# Supplementary material for: Molecular Stratification of Chronic Kidney Disease
Source: bioRxiv or medRxiv preprint supplement (doi:10.1101/2021.09.09.21263234), 2021-09-13
Supplement: Supplementary file [file media-1.pdf]

## Supplemental Acknowledgement

### Members of the Nephrotic Syndrome Study Network (NEPTUNE)

#### NEPTUNE Enrolling Centers

*Cleveland Clinic, Cleveland, OH:* K Dell\*, J Sedor\*\*, M Schachere#, J Negrey#  
*Children's Hospital, Los Angeles, CA:* K Lemley\*, E Lim#  
*Children's Mercy Hospital, Kansas City, MO:* T Srivastava\*, A Garrett#  
*Cohen Children's Hospital, New Hyde Park, NY:* C Sethna\*, K Laurent #  
*Columbia University, New York, NY:* P Canetta\*, A Pradhan#  
*Emory University, Atlanta, GA:* L Greenbaum\*, C Wang\*\*, C Kang#  
*Harbor-University of California Los Angeles Medical Center:* S Adler\*, J LaPage#  
*John H. Stroger Jr. Hospital of Cook County, Chicago, IL:* A Athavale\*, M Itteera  
*Johns Hopkins Medicine, Baltimore, MD:* M Atkinson\*, S Boynton#  
*Mayo Clinic, Rochester, MN:* F Fervenza\*, M Hogan\*\*, J Lieske\*, V Chernitskiy#  
*Montefiore Medical Center, Bronx, NY:* F Kaskel\*, M Ross\*, P Flynn#  
*NIDDK Intramural, Bethesda MD:* J Kopp\*, J Blake#  
*New York University Medical Center, New York, NY:* H Trachtman\*, O Zhdanova\*\*, F Modersitzki#, S Vento#  
*Stanford University, Stanford, CA:* R Lafayette\*, K Mehta#  
*Temple University, Philadelphia, PA:* C Gadegbeku\*, S Quinn-Boyle#  
*University Health Network Toronto:* M Hladunewich\*\*, H Reich\*\*, P Ling#, M Romano#  
*University of Miami, Miami, FL:* A Fornoni\*, C Bidot#  
*University of Michigan, Ann Arbor, MI:* M Kretzler\*, D Gipson\*, A Williams#, J LaVigne#  
*University of North Carolina, Chapel Hill, NC:* V Derebail\*, K Gibson\*, E Cole#, J Ormond-Foster#  
*University of Pennsylvania, Philadelphia, PA:* L Holzman\*, K Meyers\*\*, K Kallem#, A Swenson#  
*University of Texas Southwestern, Dallas, TX:* K Sambandam\*, Z Wang#, M Rogers#  
*University of Washington, Seattle, WA:* A Jefferson\*, S Hingorani\*\*, K Tuttle\*\*§, M Bray#, M Kelton#, A Cooper#§  
*Wake Forest University Baptist Health, Winston-Salem, NC:* JJ Lin\*, Stefanie Baker#

*Data Analysis and Coordinating Center:* M Kretzler, L Barisoni, J Bixler, H Desmond, S Eddy, D Fermin, C Gadegbeku, B Gillespie, D Gipson, L Holzman, V Kurtz, M Larkina, J Lavigne, S Li, S Li, CC Lienczewski, J Liu, T Mainieri, L Mariani, M Sampson, J Sedor, A Smith, A Williams, J Zee.

*Digital Pathology Committee:* Carmen Avila-Casado (University Health Network, Toronto), Serena Bagnasco (Johns Hopkins University), Joseph Gaut (Washington University in St Louis), Stephen Hewitt (National Cancer Institute), Jeff Hodgins (University of Michigan), Kevin Lemley (Children's Hospital of Los Angeles), Laura Mariani (University of Michigan), Matthew Palmer (University of Pennsylvania), Avi Rosenberg (Johns Hopkins University), Virginie Royal (University of Montreal), David Thomas (University of Miami), Jarcy Zee (University of Pennsylvania) Co-Chairs: Laura Barisoni (Duke University) and Cynthia Nast (Cedar Sinai).

\*Principal Investigator; \*\*Co-investigator; #Study Coordinator

§Providence Medical Research Center, Spokane, WA

**Fig S1. Gene expression levels across CKD molecular categories and healthy controls**

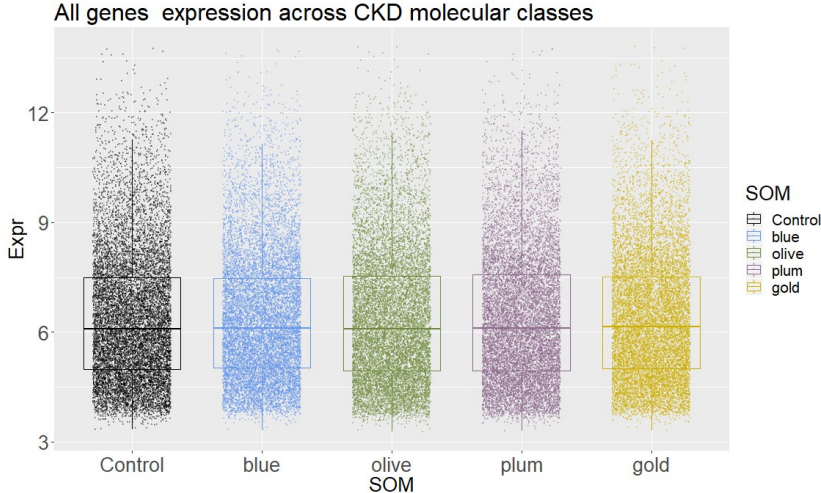

**Fig S2. eGFR by molecular category stratified by CKD stage**

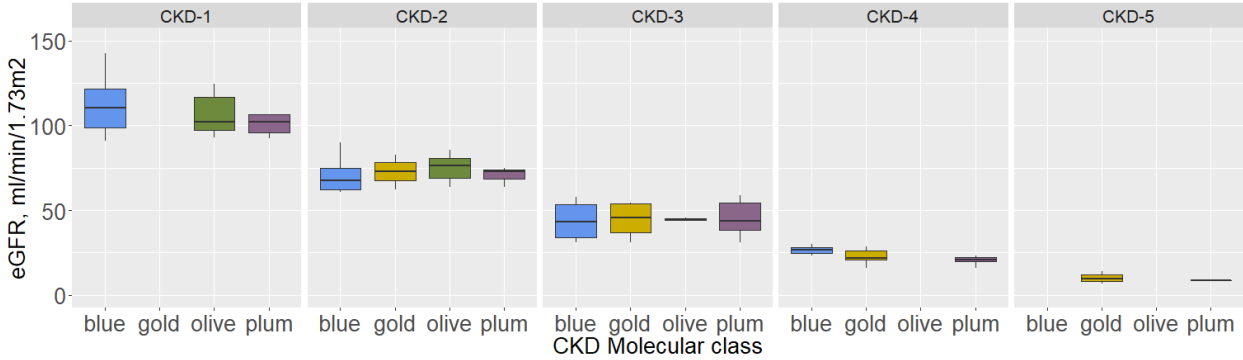

**Fig S3. Kaplan-Meier survival curves for prediction of ESKD outcome stratified by (A) CKD stage (C-PROBE) and (B) histopathological diagnosis (NEPTUNE)**

A.

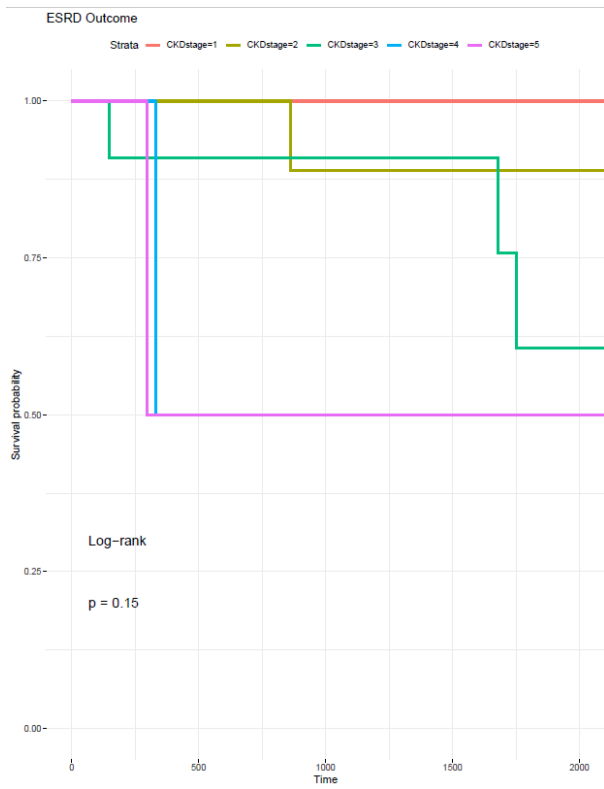

B.

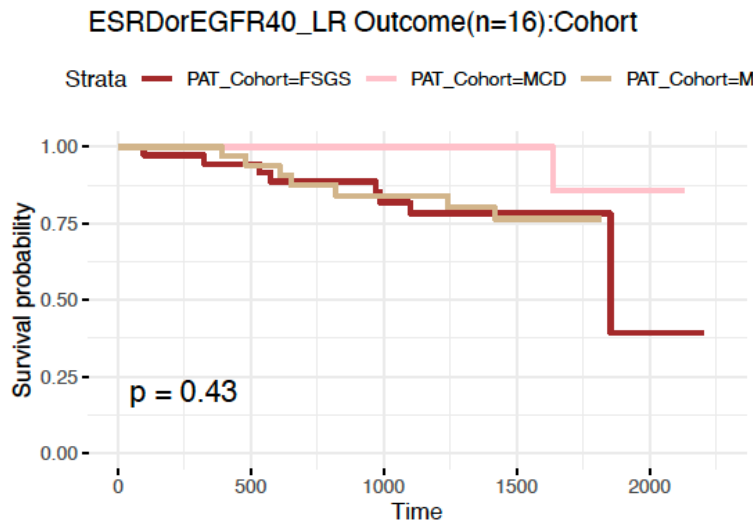

### Fig S4. Data clustering tendency assessment

(A) Pairwise Spearman correlation-based distances between samples to assess similarity between observations. (B) VAT (Visual Assessment of cluster Tendency). The value of Hopkins statistic is below 0.5, implying that the dataset is significantly clusterable, that is, contains inherent grouping structure.

A.

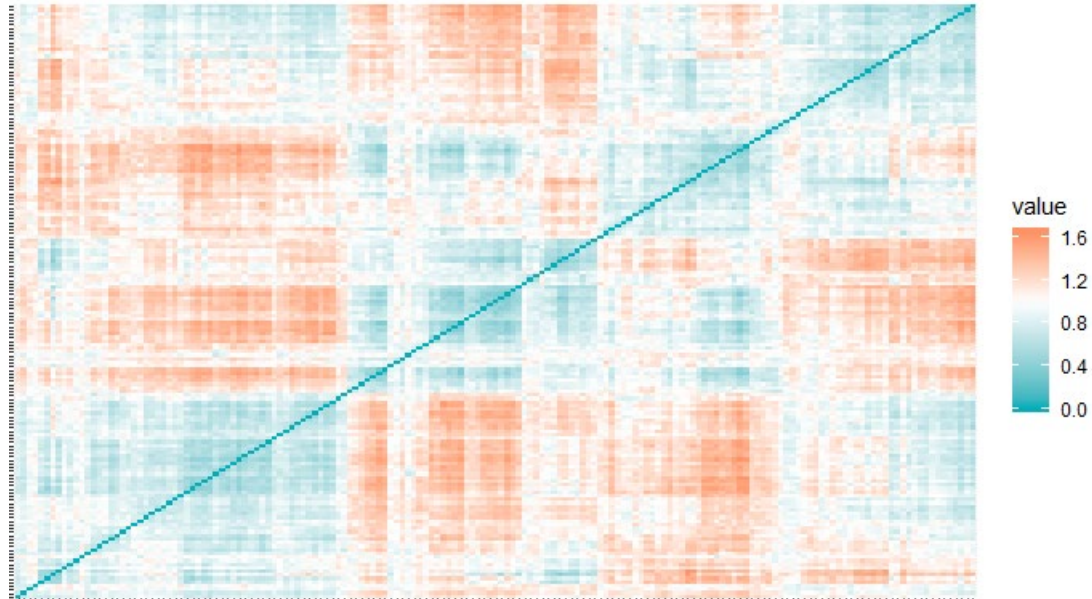

B.

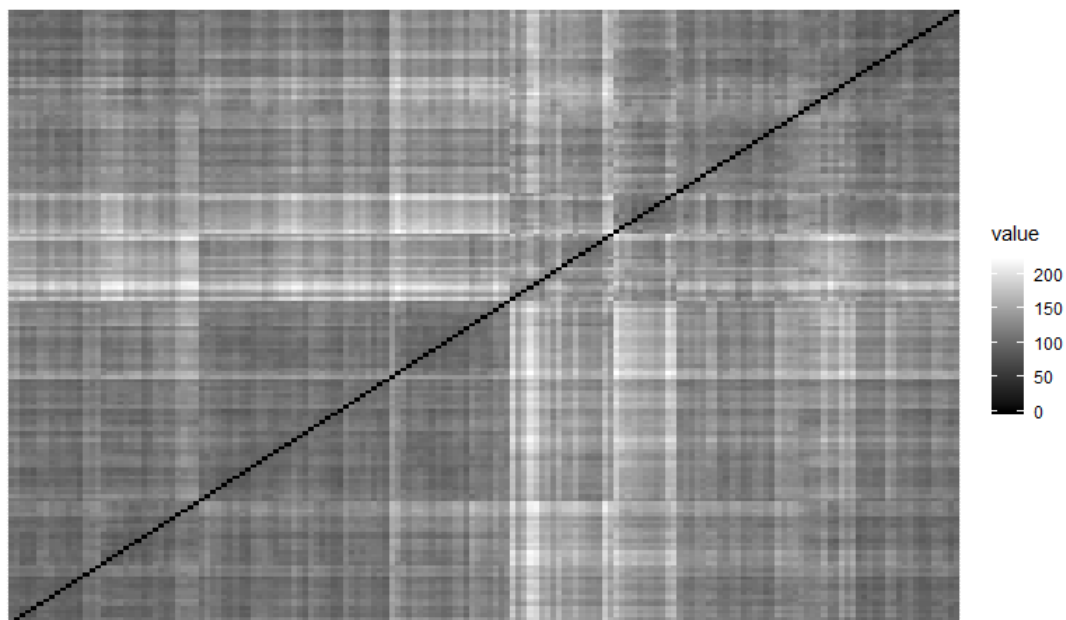

```
$hopkins_stat  
[1] 0.3526008
```

## Fig S5. Building Self-Organizing Map of CKD population

- (A) SOM mapping quality, estimated by the average distance of each data point to its corresponding codebook vector (BMU), plotted as a function of map grid size. Is a measure of map resolution. 8x8 grid is the simplest model achieving the best mapping.
- (B) Convergence as a linear combination of the two SOM quality indices, embedding accuracy and estimated topographic accuracy, was evaluated across various N iterations and reached 0.8 at 50,000. The embedding accuracy (black line) is the variance of the training data captured by the map. Evaluated by Kolmogorov-Smirnov test. Grows with the number of iterations, acceptable at 50,000. Topographic accuracy (blue line) is the proportion of data points for which first and second BMUs are adjacent units. Measures topology preservation. Is perfect already at 1,000 iterations.
- (C) Learning progress is similar across 10 independent models. Considering the random nature of SOM initialization, behaviors of SOMs from 10 independent runs were compared. The results and conclusions were not materially different.

### A. Quantization error vs map size

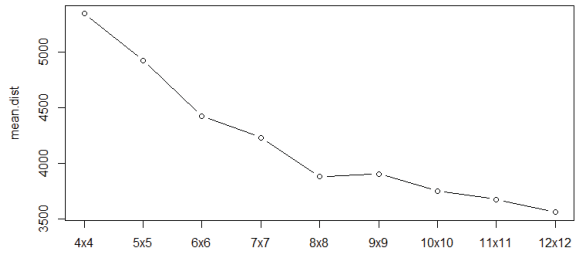

### C. Learning progress across 10 independent models

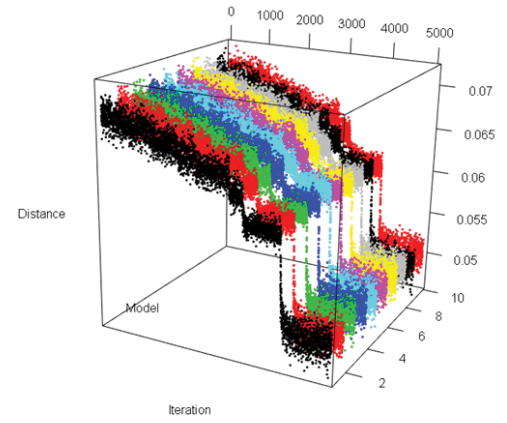

### B. Convergence vs N iterations

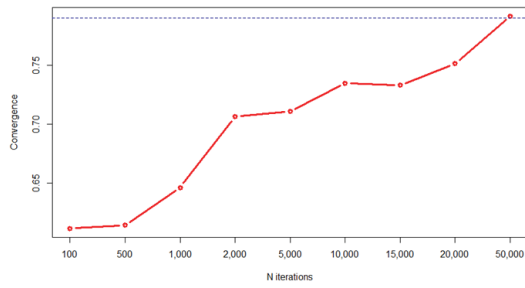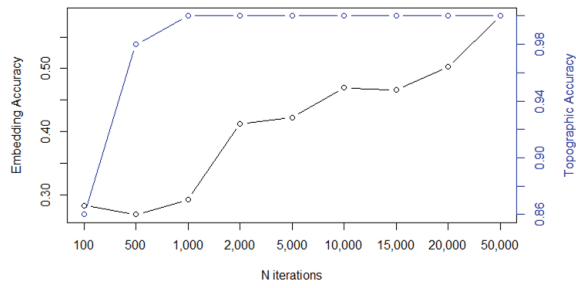

## Fig S6. Final model SOM properties

(A) Diagnostic counts plots; (B) mapping quality; (C) neighbor distances; (D) number of clusters. (E) The simplest model with the lowest within-cluster sum-of-squares is selected.

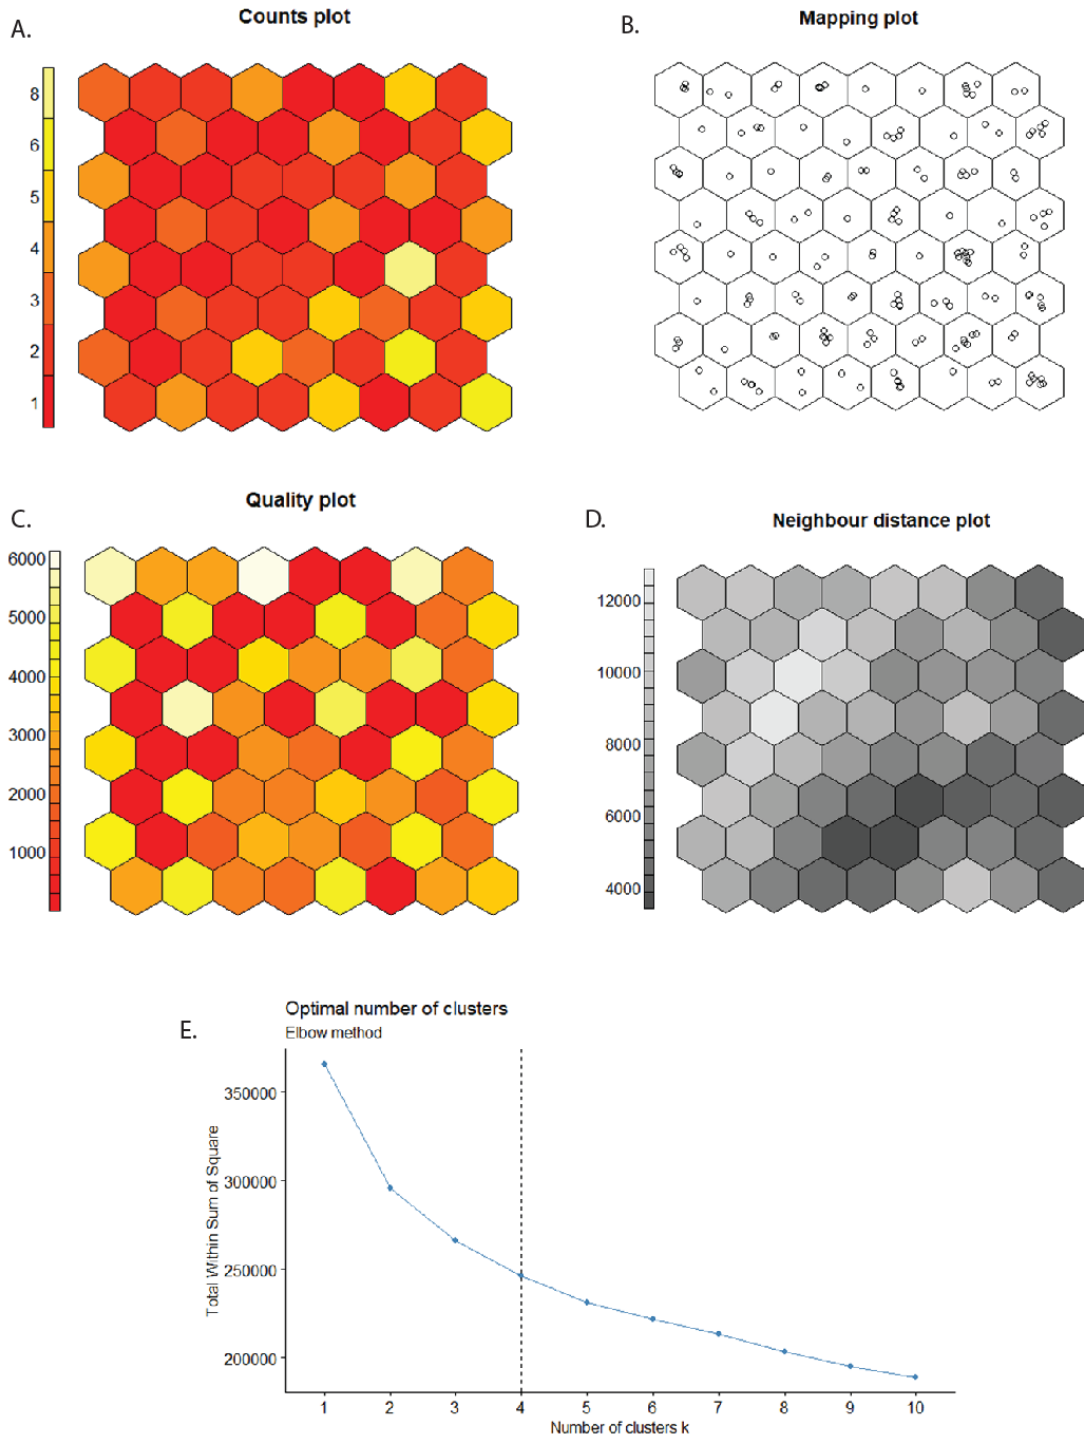



Table S1 Blue vs. Control

| Gene    | logFC    | UnlogFC  | AveExpr  | t        | P.Value  | adj.P.Val | B        |
|---------|----------|----------|----------|----------|----------|-----------|----------|
| ZFAND5  | -0.88879 | 0.540069 | 9.558462 | -13.0917 | 6.13E-24 | 5.18E-20  | 43.5909  |
| RHOB    | -1.06268 | 0.478741 | 9.158654 | -11.2635 | 7.22E-20 | 3.05E-16  | 34.53365 |
| PDK4    | -1.66283 | 0.315818 | 7.451346 | -10.986  | 3.05E-19 | 8.60E-16  | 33.13811 |
| CEBPB   | -1.01112 | 0.496159 | 8.251538 | -10.7939 | 8.29E-19 | 1.75E-15  | 32.17016 |
| PTP4A1  | -0.4373  | 0.738515 | 7.598077 | -10.5894 | 2.41E-18 | 3.68E-15  | 31.13808 |
| GADD45B | -1.42193 | 0.373214 | 7.985481 | -10.5737 | 2.61E-18 | 3.68E-15  | 31.05908 |
| NFKBIA  | -0.77826 | 0.583069 | 9.409231 | -10.5106 | 3.63E-18 | 4.38E-15  | 30.74022 |
| KLF6    | -1.2353  | 0.424754 | 8.020865 | -10.3494 | 8.40E-18 | 8.88E-15  | 29.92552 |
| SGK1    | -0.9093  | 0.532442 | 10.47702 | -10.1156 | 2.84E-17 | 2.65E-14  | 28.74337 |
| ZFP36   | -1.03391 | 0.488386 | 8.256442 | -10.0968 | 3.14E-17 | 2.65E-14  | 28.64841 |
| DUSP1   | -1.39842 | 0.379345 | 7.426635 | -10.0527 | 3.95E-17 | 3.03E-14  | 28.42551 |
| FAM134B | -0.68334 | 0.622724 | 9.235865 | -10.0278 | 4.49E-17 | 3.17E-14  | 28.29956 |
| MAFF    | -2.05172 | 0.241196 | 6.295769 | -9.99219 | 5.41E-17 | 3.52E-14  | 28.11949 |
| JUND    | -0.55109 | 0.682502 | 5.964615 | -9.662   | 3.02E-16 | 1.83E-13  | 26.45018 |
| NEDD9   | -0.65863 | 0.63348  | 7.288558 | -9.62829 | 3.61E-16 | 2.03E-13  | 26.27983 |
| SLC19A2 | -0.70598 | 0.613025 | 6.815192 | -9.55572 | 5.26E-16 | 2.78E-13  | 25.91319 |
| APOLD1  | -0.8281  | 0.563269 | 5.593173 | -9.42557 | 1.04E-15 | 5.15E-13  | 25.25613 |
| CISH    | -0.76475 | 0.588557 | 8.148942 | -9.1562  | 4.20E-15 | 1.97E-12  | 23.89821 |
| MCL1    | -0.52537 | 0.694779 | 7.715481 | -9.08681 | 6.01E-15 | 2.68E-12  | 23.54895 |
| CEBPD   | -0.82184 | 0.565718 | 9.885577 | -9.02129 | 8.45E-15 | 3.57E-12  | 23.21945 |
| RGS2    | -1.21088 | 0.432006 | 7.761442 | -8.90275 | 1.56E-14 | 6.28E-12  | 22.62399 |
| GADD45A | -0.72603 | 0.604563 | 10.4401  | -8.75949 | 3.27E-14 | 1.26E-11  | 21.9057  |
| CCNL1   | -0.48427 | 0.714857 | 7.405577 | -8.71458 | 4.12E-14 | 1.46E-11  | 21.68088 |
| CDKN1A  | -0.67052 | 0.628281 | 8.146058 | -8.71334 | 4.15E-14 | 1.46E-11  | 21.67468 |
| ZBTB10  | -0.37768 | 0.769672 | 4.810673 | -8.68999 | 4.68E-14 | 1.58E-11  | 21.55785 |
| KLF9    | -0.59654 | 0.66134  | 6.925577 | -8.64234 | 5.98E-14 | 1.95E-11  | 21.31958 |
| DUSP6   | -0.81092 | 0.570017 | 7.654712 | -8.52846 | 1.07E-13 | 3.37E-11  | 20.75096 |
| SOCS2   | -0.81054 | 0.570169 | 6.630577 | -8.4349  | 1.74E-13 | 5.25E-11  | 20.28476 |
| GDF15   | -1.37634 | 0.385194 | 7.708077 | -8.22149 | 5.18E-13 | 1.51E-10  | 19.22495 |
| MTERF1  | 0.410082 | 1.328762 | 5.079135 | 8.1929   | 6.00E-13 | 1.69E-10  | 19.08337 |
| TIPARP  | -0.95013 | 0.517587 | 8.469904 | -8.08508 | 1.04E-12 | 2.76E-10  | 18.5504  |
| JOSD1   | -0.37407 | 0.771602 | 7.318558 | -8.08399 | 1.04E-12 | 2.76E-10  | 18.54505 |
| SERTAD3 | -0.37379 | 0.771755 | 6.675673 | -7.99731 | 1.62E-12 | 4.16E-10  | 18.11773 |
| NR4A1   | -0.95534 | 0.515718 | 6.167212 | -7.98524 | 1.72E-12 | 4.29E-10  | 18.05833 |
| FILIP1L | -0.56673 | 0.675145 | 5.604808 | -7.97713 | 1.80E-12 | 4.34E-10  | 18.01837 |
| FERMT2  | -0.34543 | 0.787075 | 7.726923 | -7.9571  | 1.99E-12 | 4.67E-10  | 17.91984 |
| RGS3    | -0.46291 | 0.725522 | 6.334231 | -7.69973 | 7.30E-12 | 1.67E-09  | 16.65927 |
| FOSB    | -1.44188 | 0.368087 | 5.944135 | -7.66529 | 8.68E-12 | 1.93E-09  | 16.49141 |
| BHLHE40 | -0.60767 | 0.656256 | 7.635673 | -7.65232 | 9.27E-12 | 2.01E-09  | 16.42824 |
| RND3    | -0.61581 | 0.652564 | 7.415481 | -7.63721 | 1.00E-11 | 2.11E-09  | 16.35467 |
| TRIB1   | -0.68239 | 0.623132 | 7.171827 | -7.5131  | 1.86E-11 | 3.84E-09  | 15.75214 |
| KLF10   | -0.83191 | 0.561784 | 7.267788 | -7.50131 | 1.97E-11 | 3.97E-09  | 15.69502 |
| EGR1    | -1.26379 | 0.41645  | 6.954327 | -7.48013 | 2.19E-11 | 4.31E-09  | 15.59252 |
| IER3    | -0.94246 | 0.520345 | 8.499615 | -7.4731  | 2.27E-11 | 4.36E-09  | 15.55854 |
| CYR61   | -1.18675 | 0.439292 | 7.185769 | -7.46903 | 2.32E-11 | 4.36E-09  | 15.53885 |

|          |          |          |          |          |          |          |          |
|----------|----------|----------|----------|----------|----------|----------|----------|
| JUNB     | -0.84981 | 0.55486  | 6.403462 | -7.37635 | 3.68E-11 | 6.76E-09 | 15.09157 |
| ATF3     | -1.46087 | 0.363274 | 6.086154 | -7.35118 | 4.17E-11 | 7.50E-09 | 14.9704  |
| EIF2AK3  | -0.47436 | 0.719785 | 5.776538 | -7.33244 | 4.58E-11 | 8.06E-09 | 14.88025 |
| IL6R     | -0.48115 | 0.716404 | 6.200577 | -7.31558 | 4.98E-11 | 8.59E-09 | 14.79923 |
| CHSY1    | -0.4784  | 0.717772 | 6.752981 | -7.27611 | 6.05E-11 | 1.02E-08 | 14.60973 |
| ETS2     | -0.53504 | 0.690141 | 6.735962 | -7.08621 | 1.54E-10 | 2.56E-08 | 13.70287 |
| RAB20    | -0.52031 | 0.697223 | 8.735481 | -7.02618 | 2.07E-10 | 3.37E-08 | 13.41793 |
| SLC38A2  | -0.43419 | 0.740109 | 9.988942 | -7.01007 | 2.24E-10 | 3.58E-08 | 13.34158 |
| CYP27B1  | -0.97914 | 0.507283 | 8.498942 | -6.99558 | 2.41E-10 | 3.77E-08 | 13.273   |
| MIR22HG  | -0.54181 | 0.686907 | 8.478269 | -6.97589 | 2.65E-10 | 4.07E-08 | 13.17983 |
| VPS37B   | -0.43485 | 0.739771 | 6.345096 | -6.96576 | 2.78E-10 | 4.20E-08 | 13.13198 |
| GEM      | -0.85882 | 0.551405 | 6.338654 | -6.93276 | 3.27E-10 | 4.85E-08 | 12.97619 |
| IFRD1    | -0.42274 | 0.746008 | 5.811635 | -6.92087 | 3.47E-10 | 5.05E-08 | 12.92009 |
| JUN      | -0.98238 | 0.506143 | 6.563654 | -6.88161 | 4.20E-10 | 6.01E-08 | 12.73522 |
| JADE1    | -0.39541 | 0.760272 | 8.197308 | -6.844   | 5.04E-10 | 7.10E-08 | 12.55847 |
| IFIT2    | 0.492616 | 1.406994 | 6.43625  | 6.829115 | 5.42E-10 | 7.41E-08 | 12.48861 |
| IER2     | -0.64073 | 0.641386 | 9.377885 | -6.82729 | 5.46E-10 | 7.41E-08 | 12.48006 |
| FOS      | -1.65891 | 0.316678 | 6.64875  | -6.82501 | 5.52E-10 | 7.41E-08 | 12.46937 |
| CYP51A1  | -0.45387 | 0.730083 | 6.635577 | -6.75465 | 7.77E-10 | 1.03E-07 | 12.14004 |
| PER1     | -0.40331 | 0.75612  | 7.489423 | -6.73567 | 8.51E-10 | 1.11E-07 | 12.05144 |
| ERF      | -0.27409 | 0.826974 | 6.721058 | -6.70145 | 1.00E-09 | 1.29E-07 | 11.89191 |
| TFRC     | -0.66217 | 0.631929 | 8.032019 | -6.68937 | 1.06E-09 | 1.34E-07 | 11.83568 |
| CTGF     | -0.91728 | 0.529507 | 8.577788 | -6.65207 | 1.27E-09 | 1.58E-07 | 11.6623  |
| PQLC1    | -0.47813 | 0.717906 | 9.066827 | -6.60736 | 1.58E-09 | 1.93E-07 | 11.45499 |
| YRDC     | -0.22533 | 0.855399 | 7.067596 | -6.55147 | 2.06E-09 | 2.49E-07 | 11.19665 |
| COQ10B   | -0.21993 | 0.85861  | 8.403654 | -6.54865 | 2.09E-09 | 2.49E-07 | 11.18363 |
| ZSCAN26  | 0.249243 | 1.188583 | 6.116827 | 6.501955 | 2.61E-09 | 3.06E-07 | 10.96853 |
| SLC20A1  | -0.45942 | 0.727281 | 7.150962 | -6.47976 | 2.90E-09 | 3.36E-07 | 10.86653 |
| SMAD7    | -0.35203 | 0.78348  | 6.659327 | -6.40705 | 4.10E-09 | 4.68E-07 | 10.53336 |
| SPRY2    | -0.3183  | 0.802015 | 6.585096 | -6.39588 | 4.32E-09 | 4.87E-07 | 10.48234 |
| HNRNPA0  | -0.18567 | 0.879238 | 8.039712 | -6.37452 | 4.78E-09 | 5.31E-07 | 10.38481 |
| HES1     | -0.45954 | 0.727217 | 7.110673 | -6.36186 | 5.07E-09 | 5.56E-07 | 10.32711 |
| SLCO4A1  | -0.78788 | 0.579195 | 6.654519 | -6.35944 | 5.13E-09 | 5.56E-07 | 10.3161  |
| MYLIP    | 0.380442 | 1.301741 | 7.250865 | 6.344829 | 5.49E-09 | 5.87E-07 | 10.24954 |
| HBEGF    | -0.51239 | 0.701059 | 5.691635 | -6.34256 | 5.55E-09 | 5.87E-07 | 10.2392  |
| ARF6     | -0.25196 | 0.839757 | 7.821442 | -6.31616 | 6.29E-09 | 6.56E-07 | 10.11921 |
| SPATA2L  | -0.43485 | 0.739771 | 7.355096 | -6.31305 | 6.38E-09 | 6.58E-07 | 10.10505 |
| UPF2     | 0.223306 | 1.167406 | 6.441058 | 6.303881 | 6.66E-09 | 6.79E-07 | 10.06344 |
| RNF138   | -0.25929 | 0.8355   | 7.242788 | -6.29964 | 6.80E-09 | 6.83E-07 | 10.04421 |
| ZBED8    | 0.324978 | 1.252645 | 4.538846 | 6.297611 | 6.86E-09 | 6.83E-07 | 10.03499 |
| PPID     | 0.307781 | 1.237802 | 7.874038 | 6.287398 | 7.20E-09 | 7.08E-07 | 9.988676 |
| PRKRA    | -0.23085 | 0.852134 | 7.719519 | -6.26419 | 8.03E-09 | 7.70E-07 | 9.883563 |
| RBBP8    | -0.42292 | 0.745912 | 9.003269 | -6.26222 | 8.10E-09 | 7.70E-07 | 9.874636 |
| PPP1R15A | -0.34663 | 0.786417 | 5.91625  | -6.26208 | 8.11E-09 | 7.70E-07 | 9.874018 |
| PIM1     | -0.30756 | 0.808009 | 6.455    | -6.23519 | 9.20E-09 | 8.58E-07 | 9.752468 |
| SLC29A3  | 0.272451 | 1.207858 | 6.867596 | 6.234403 | 9.23E-09 | 8.58E-07 | 9.748897 |
| BTG3     | -0.44905 | 0.732526 | 7.564135 | -6.17096 | 1.24E-08 | 1.14E-06 | 9.463083 |

|           |          |          |          |          |          |          |          |
|-----------|----------|----------|----------|----------|----------|----------|----------|
| SDPR      | -0.31475 | 0.803989 | 5.305769 | -6.1696  | 1.25E-08 | 1.14E-06 | 9.456939 |
| KLF5      | -0.3075  | 0.808039 | 4.943942 | -6.1352  | 1.47E-08 | 1.32E-06 | 9.302553 |
| RNASEL    | 0.247886 | 1.187466 | 6.523462 | 6.129737 | 1.50E-08 | 1.34E-06 | 9.278072 |
| LIPG      | -0.5307  | 0.69222  | 5.274904 | -6.12425 | 1.54E-08 | 1.36E-06 | 9.253488 |
| LDLR      | -0.45283 | 0.730606 | 5.256154 | -6.12233 | 1.56E-08 | 1.36E-06 | 9.244896 |
| ELL2      | -0.58286 | 0.667637 | 6.212115 | -6.10425 | 1.69E-08 | 1.46E-06 | 9.163982 |
| ETF1      | -0.19114 | 0.875914 | 8.845577 | -6.10102 | 1.72E-08 | 1.47E-06 | 9.149523 |
| EPHA4     | 0.301454 | 1.232386 | 6.179423 | 6.089738 | 1.81E-08 | 1.53E-06 | 9.099124 |
| FAM102A   | -0.27332 | 0.827413 | 7.217788 | -6.08252 | 1.87E-08 | 1.56E-06 | 9.066896 |
| CD83      | -0.46983 | 0.722051 | 7.967981 | -6.08003 | 1.89E-08 | 1.56E-06 | 9.055787 |
| IFIT3     | 0.587504 | 1.502645 | 7.347212 | 6.079135 | 1.90E-08 | 1.56E-06 | 9.05178  |
| TUBB2A    | -0.44806 | 0.733029 | 9.634904 | -6.05178 | 2.16E-08 | 1.75E-06 | 8.929817 |
| MAP2K3    | -0.25314 | 0.839068 | 7.853173 | -6.03994 | 2.28E-08 | 1.84E-06 | 8.877095 |
| ZNF165    | -0.4743  | 0.719818 | 4.61875  | -5.98866 | 2.89E-08 | 2.30E-06 | 8.649433 |
| GABARAPL  | -0.30177 | 0.811257 | 8.261923 | -5.98422 | 2.95E-08 | 2.31E-06 | 8.629749 |
| FANCC     | 0.240375 | 1.1813   | 6.530577 | 5.981296 | 2.99E-08 | 2.31E-06 | 8.616797 |
| VMP1      | -0.25153 | 0.840006 | 8.682115 | -5.97993 | 3.01E-08 | 2.31E-06 | 8.610752 |
| FOSL2     | -0.27972 | 0.823749 | 5.716827 | -5.97917 | 3.02E-08 | 2.31E-06 | 8.607372 |
| SERPINE1  | -0.61939 | 0.650945 | 5.514135 | -5.97787 | 3.04E-08 | 2.31E-06 | 8.601611 |
| AMOT      | 0.272174 | 1.207626 | 10.10462 | 5.961194 | 3.28E-08 | 2.47E-06 | 8.527852 |
| TSC22D3   | -0.70821 | 0.61208  | 8.827212 | -5.95765 | 3.33E-08 | 2.49E-06 | 8.512177 |
| RCAN1     | -0.45361 | 0.730216 | 7.745288 | -5.93481 | 3.70E-08 | 2.72E-06 | 8.411335 |
| SLC39A14  | -0.33961 | 0.790255 | 8.055385 | -5.93377 | 3.72E-08 | 2.72E-06 | 8.406748 |
| AP3M2     | 0.244955 | 1.185056 | 7.056827 | 5.931913 | 3.75E-08 | 2.72E-06 | 8.39855  |
| CITED2    | 0.438448 | 1.355146 | 7.159519 | 5.9311   | 3.76E-08 | 2.72E-06 | 8.394964 |
| DDX5      | -0.23587 | 0.849173 | 9.934327 | -5.92282 | 3.91E-08 | 2.78E-06 | 8.358463 |
| SRSF2     | -0.19749 | 0.872067 | 8.043558 | -5.92073 | 3.94E-08 | 2.78E-06 | 8.34924  |
| ARG2      | -0.40979 | 0.752733 | 8.337115 | -5.92071 | 3.94E-08 | 2.78E-06 | 8.349163 |
| HMGCR     | -0.35941 | 0.779484 | 6.610865 | -5.91849 | 3.98E-08 | 2.78E-06 | 8.339388 |
| TXNL4B    | 0.231162 | 1.17378  | 6.654135 | 5.91511  | 4.05E-08 | 2.80E-06 | 8.324493 |
| MLF2      | -0.23588 | 0.849169 | 8.420192 | -5.88564 | 4.63E-08 | 3.18E-06 | 8.194854 |
| BTG2      | -0.61126 | 0.654625 | 7.130192 | -5.87731 | 4.81E-08 | 3.28E-06 | 8.158258 |
| ZNF331    | -0.48635 | 0.713829 | 6.745288 | -5.84186 | 5.65E-08 | 3.82E-06 | 8.002874 |
| EIF5      | -0.18867 | 0.877417 | 8.745    | -5.83423 | 5.85E-08 | 3.93E-06 | 7.969475 |
| YWHAZ     | -0.30143 | 0.811447 | 9.832981 | -5.82439 | 6.12E-08 | 4.07E-06 | 7.926485 |
| PNRC1     | -0.26131 | 0.834329 | 10.05644 | -5.80756 | 6.61E-08 | 4.36E-06 | 7.852977 |
| TACC1     | -0.3452  | 0.787198 | 8.345962 | -5.79254 | 7.07E-08 | 4.63E-06 | 7.787469 |
| CSNK1G1   | 0.155    | 1.113422 | 5.116442 | 5.771802 | 7.77E-08 | 5.05E-06 | 7.697182 |
| IDI1      | -0.23786 | 0.848    | 8.769519 | -5.7662  | 7.97E-08 | 5.14E-06 | 7.672813 |
| PCDH17    | 0.242961 | 1.183419 | 5.267019 | 5.746586 | 8.70E-08 | 5.57E-06 | 7.587618 |
| GCLM      | -0.34918 | 0.785029 | 6.820481 | -5.74309 | 8.84E-08 | 5.62E-06 | 7.572456 |
| ZNF227    | 0.224453 | 1.168334 | 4.748654 | 5.728319 | 9.45E-08 | 5.96E-06 | 7.508402 |
| CDKN1C    | -0.41066 | 0.752279 | 8.3275   | -5.70943 | 1.03E-07 | 6.44E-06 | 7.426622 |
| WDR13     | -0.20425 | 0.86799  | 8.849135 | -5.70468 | 1.05E-07 | 6.53E-06 | 7.40607  |
| NFIL3     | -0.52274 | 0.696047 | 8.016731 | -5.69362 | 1.10E-07 | 6.82E-06 | 7.358285 |
| LINC00472 | -0.30299 | 0.81057  | 4.962981 | -5.68783 | 1.13E-07 | 6.95E-06 | 7.333279 |
| FAN1      | 0.194243 | 1.144124 | 6.346154 | 5.678917 | 1.18E-07 | 7.18E-06 | 7.294826 |

|          |          |          |          |          |          |          |          |
|----------|----------|----------|----------|----------|----------|----------|----------|
| FAM131A  | -0.22352 | 0.856471 | 5.939038 | -5.66369 | 1.26E-07 | 7.60E-06 | 7.229209 |
| ZNF184   | -0.29417 | 0.815543 | 5.839423 | -5.66294 | 1.27E-07 | 7.60E-06 | 7.225961 |
| IARS     | -0.25405 | 0.83854  | 9.657885 | -5.6548  | 1.32E-07 | 7.83E-06 | 7.190923 |
| ZNF816   | 0.299895 | 1.231055 | 6.789423 | 5.649337 | 1.35E-07 | 7.97E-06 | 7.16741  |
| CHD1     | -0.24009 | 0.846693 | 6.166538 | -5.62994 | 1.47E-07 | 8.63E-06 | 7.084062 |
| BAG3     | -0.42401 | 0.74535  | 9.32875  | -5.60493 | 1.64E-07 | 9.58E-06 | 6.976784 |
| KCTD15   | 0.179648 | 1.132607 | 5.751058 | 5.574465 | 1.88E-07 | 1.09E-05 | 6.846486 |
| BAIAP2   | -0.26845 | 0.830212 | 5.870288 | -5.57218 | 1.90E-07 | 1.09E-05 | 6.836723 |
| PPP1R3C  | 0.483703 | 1.398328 | 7.175192 | 5.568161 | 1.94E-07 | 1.11E-05 | 6.819571 |
| ACKR3    | -0.49968 | 0.707265 | 6.273942 | -5.56645 | 1.95E-07 | 1.11E-05 | 6.81229  |
| SOWAHC   | -0.35501 | 0.781862 | 7.34375  | -5.53543 | 2.24E-07 | 1.26E-05 | 6.680082 |
| NR4A3    | -0.38197 | 0.767388 | 4.595673 | -5.53304 | 2.26E-07 | 1.27E-05 | 6.66991  |
| LIFR     | -0.22244 | 0.857112 | 5.249423 | -5.52284 | 2.37E-07 | 1.32E-05 | 6.626539 |
| GATA6    | -0.31064 | 0.806281 | 4.151538 | -5.51522 | 2.45E-07 | 1.35E-05 | 6.594183 |
| AVPI1    | -0.2752  | 0.826334 | 7.145    | -5.49834 | 2.64E-07 | 1.44E-05 | 6.522567 |
| CHIC2    | -0.22979 | 0.852759 | 7.0525   | -5.49824 | 2.64E-07 | 1.44E-05 | 6.52213  |
| MFAP1    | 0.191274 | 1.141772 | 8.278846 | 5.487861 | 2.76E-07 | 1.50E-05 | 6.478178 |
| CCDC51   | 0.246492 | 1.186319 | 8.199423 | 5.442568 | 3.37E-07 | 1.82E-05 | 6.286818 |
| LMAN2L   | 0.146432 | 1.106829 | 8.215577 | 5.434021 | 3.50E-07 | 1.87E-05 | 6.250808 |
| HECA     | -0.22323 | 0.856645 | 7.165288 | -5.42967 | 3.57E-07 | 1.90E-05 | 6.232509 |
| HNRNPDL  | -0.17711 | 0.884475 | 8.590577 | -5.41769 | 3.76E-07 | 1.99E-05 | 6.182086 |
| F3       | -0.54786 | 0.684032 | 6.121635 | -5.41213 | 3.85E-07 | 2.02E-05 | 6.158702 |
| CHI3L1   | -0.74519 | 0.59659  | 5.746154 | -5.40716 | 3.94E-07 | 2.06E-05 | 6.137825 |
| ADM      | -0.63734 | 0.642898 | 9.290865 | -5.37993 | 4.44E-07 | 2.30E-05 | 6.023636 |
| GMNN     | -0.28824 | 0.818901 | 7.749904 | -5.37831 | 4.47E-07 | 2.30E-05 | 6.016848 |
| SPTSSA   | -0.191   | 0.876    | 7.619135 | -5.37291 | 4.57E-07 | 2.34E-05 | 5.99424  |
| AKIRIN1  | -0.23972 | 0.846913 | 7.318269 | -5.34947 | 5.07E-07 | 2.58E-05 | 5.896298 |
| ATG101   | -0.2016  | 0.869583 | 7.403654 | -5.3341  | 5.42E-07 | 2.74E-05 | 5.832188 |
| KDELC1   | 0.314303 | 1.243411 | 5.031154 | 5.321353 | 5.73E-07 | 2.88E-05 | 5.779089 |
| DDX3X    | -0.33513 | 0.79271  | 7.75875  | -5.31915 | 5.78E-07 | 2.89E-05 | 5.769929 |
| DLK2     | 0.162444 | 1.119181 | 5.592115 | 5.309685 | 6.02E-07 | 3.00E-05 | 5.730557 |
| RYBP     | -0.20893 | 0.86518  | 7.604135 | -5.30399 | 6.17E-07 | 3.05E-05 | 5.706906 |
| HNF1B    | 0.249445 | 1.18875  | 9.488462 | 5.30151  | 6.24E-07 | 3.07E-05 | 5.696592 |
| RRAD     | -0.55349 | 0.681368 | 5.146538 | -5.30009 | 6.28E-07 | 3.07E-05 | 5.690676 |
| DUSP5    | -0.50522 | 0.704554 | 5.208462 | -5.29874 | 6.32E-07 | 3.07E-05 | 5.685073 |
| STEAP1   | 0.329888 | 1.256915 | 6.892019 | 5.288434 | 6.60E-07 | 3.19E-05 | 5.642328 |
| VEGFA    | -0.26213 | 0.833857 | 7.330769 | -5.27831 | 6.90E-07 | 3.30E-05 | 5.60036  |
| ADRM1    | -0.17004 | 0.888815 | 7.720385 | -5.27821 | 6.90E-07 | 3.30E-05 | 5.599963 |
| KNOP1    | 0.195067 | 1.144778 | 6.055962 | 5.240478 | 8.12E-07 | 3.86E-05 | 5.443974 |
| ATF7IP   | 0.227324 | 1.170661 | 7.062212 | 5.236065 | 8.28E-07 | 3.91E-05 | 5.425775 |
| NOL8     | 0.212796 | 1.158932 | 6.799327 | 5.232567 | 8.41E-07 | 3.94E-05 | 5.411355 |
| HOMER1   | -0.38428 | 0.766161 | 5.517212 | -5.23174 | 8.44E-07 | 3.94E-05 | 5.407929 |
| NAMPT    | -0.28504 | 0.82072  | 7.525385 | -5.2304  | 8.48E-07 | 3.94E-05 | 5.402442 |
| UAP1     | -0.42223 | 0.746272 | 7.977788 | -5.22845 | 8.56E-07 | 3.95E-05 | 5.394391 |
| MCM2     | 0.198396 | 1.147422 | 6.256731 | 5.224708 | 8.70E-07 | 4.00E-05 | 5.378978 |
| METTL21B | -0.36088 | 0.778691 | 7.780481 | -5.21524 | 9.06E-07 | 4.14E-05 | 5.34002  |
| NDUFAF4  | -0.25039 | 0.840669 | 7.595577 | -5.20519 | 9.46E-07 | 4.30E-05 | 5.298684 |

|          |          |          |          |          |          |          |          |
|----------|----------|----------|----------|----------|----------|----------|----------|
| CD55     | -0.24268 | 0.845176 | 5.760096 | -5.18671 | 1.02E-06 | 4.63E-05 | 5.222848 |
| TMEM140  | 0.347391 | 1.272258 | 8.131346 | 5.183801 | 1.04E-06 | 4.66E-05 | 5.210912 |
| CHGB     | -0.49055 | 0.711755 | 5.564904 | -5.17713 | 1.07E-06 | 4.77E-05 | 5.18358  |
| CUTC     | -0.22964 | 0.852848 | 6.650192 | -5.17128 | 1.09E-06 | 4.87E-05 | 5.159613 |
| DNAAF2   | -0.17149 | 0.887924 | 5.832404 | -5.16289 | 1.13E-06 | 5.02E-05 | 5.125313 |
| NGRN     | -0.14722 | 0.902989 | 9.445288 | -5.1448  | 1.22E-06 | 5.39E-05 | 5.051401 |
| SLC25A32 | -0.2893  | 0.818302 | 7.031923 | -5.13788 | 1.26E-06 | 5.51E-05 | 5.023184 |
| ALX1     | 0.176259 | 1.12995  | 4.917212 | 5.137338 | 1.26E-06 | 5.51E-05 | 5.020967 |
| FKBP5    | -0.9089  | 0.532592 | 7.815288 | -5.10792 | 1.43E-06 | 6.21E-05 | 4.901229 |
| ZNF606   | 0.200037 | 1.148728 | 6.102212 | 5.099481 | 1.49E-06 | 6.40E-05 | 4.866956 |
| C2orf44  | 0.156957 | 1.114933 | 5.065577 | 5.098424 | 1.49E-06 | 6.40E-05 | 4.862669 |
| JAG1     | -0.18949 | 0.876916 | 6.100192 | -5.08241 | 1.60E-06 | 6.82E-05 | 4.797734 |
| TSPYL2   | -0.26645 | 0.83136  | 6.890096 | -5.07726 | 1.63E-06 | 6.93E-05 | 4.776885 |
| WEE1     | -0.21304 | 0.862715 | 6.754231 | -5.07088 | 1.68E-06 | 7.09E-05 | 4.751072 |
| ZNF638   | 0.196304 | 1.14576  | 8.018173 | 5.06393  | 1.73E-06 | 7.26E-05 | 4.722955 |
| KIAA0753 | 0.177436 | 1.130872 | 6.851346 | 5.057181 | 1.78E-06 | 7.43E-05 | 4.695684 |
| GUCY1A3  | 0.30512  | 1.235521 | 7.19125  | 5.051284 | 1.82E-06 | 7.58E-05 | 4.671877 |
| TNFRSF1A | -0.3085  | 0.80748  | 7.754038 | -5.04473 | 1.87E-06 | 7.76E-05 | 4.645418 |
| BHLHB9   | 0.289303 | 1.22205  | 5.542212 | 5.029833 | 1.99E-06 | 8.22E-05 | 4.585416 |
| CRY1     | -0.29166 | 0.816959 | 5.865385 | -5.02193 | 2.06E-06 | 8.44E-05 | 4.553598 |
| SLBP     | -0.19403 | 0.874163 | 8.06375  | -5.02096 | 2.07E-06 | 8.44E-05 | 4.549712 |
| ZC3H7A   | 0.22976  | 1.17264  | 6.365962 | 5.020274 | 2.08E-06 | 8.44E-05 | 4.546956 |
| DLG3     | 0.131664 | 1.095557 | 6.120385 | 5.017646 | 2.10E-06 | 8.49E-05 | 4.536393 |
| UTP18    | -0.1884  | 0.877581 | 8.668846 | -5.00733 | 2.19E-06 | 8.82E-05 | 4.494946 |
| EFNA1    | -0.37932 | 0.768801 | 8.159327 | -4.99384 | 2.32E-06 | 9.29E-05 | 4.440835 |
| RAE1     | 0.167759 | 1.123312 | 7.463558 | 4.989496 | 2.36E-06 | 9.42E-05 | 4.423438 |
| FZD5     | -0.2082  | 0.865616 | 6.980192 | -4.98332 | 2.42E-06 | 9.60E-05 | 4.398702 |
| UBE2M    | -0.23996 | 0.846767 | 7.611827 | -4.98278 | 2.43E-06 | 9.60E-05 | 4.39656  |
| FOXO1    | -0.18831 | 0.877636 | 7.423462 | -4.97402 | 2.52E-06 | 9.91E-05 | 4.361508 |
| GNA13    | -0.26088 | 0.834576 | 5.852115 | -4.97272 | 2.53E-06 | 9.92E-05 | 4.3563   |

Table S1 Gold vs. Control

| Gene     | logFC    | UnlogFC  | AveExpr  | t        | P.Value  | adj.P.Val | B        |
|----------|----------|----------|----------|----------|----------|-----------|----------|
| TMSB10   | 1.591107 | 3.012804 | 11.67899 | 16.45152 | 1.35E-27 | 6.95E-24  | 52.34374 |
| HLA-B    | 1.511812 | 2.851679 | 11.53304 | 16.3997  | 1.64E-27 | 6.95E-24  | 52.14914 |
| ANXA2    | 1.508531 | 2.845202 | 10.68949 | 15.72669 | 2.21E-26 | 6.03E-23  | 49.58955 |
| PLP2     | 1.320692 | 2.497858 | 7.491899 | 15.66198 | 2.85E-26 | 6.03E-23  | 49.34028 |
| PCBP2    | -0.83478 | 0.56067  | 9.264557 | -15.4461 | 6.66E-26 | 1.13E-22  | 48.50481 |
| TIMP1    | 2.401943 | 5.285146 | 8.73443  | 15.26821 | 1.35E-25 | 1.90E-22  | 47.81162 |
| HLA-DRA  | 1.722352 | 3.299739 | 10.1962  | 15.20572 | 1.72E-25 | 2.08E-22  | 47.56713 |
| B2M      | 0.664025 | 1.584497 | 12.68759 | 15.12228 | 2.40E-25 | 2.54E-22  | 47.23987 |
| SUGCT    | -1.10625 | 0.464501 | 8.530506 | -14.9709 | 4.40E-25 | 4.13E-22  | 46.64404 |
| CYP4A11  | -1.44953 | 0.36614  | 8.146456 | -14.7802 | 9.46E-25 | 8.00E-22  | 45.88873 |
| HPD      | -2.03084 | 0.244713 | 10.95494 | -14.6378 | 1.68E-24 | 1.26E-21  | 45.32182 |
| HAGH     | -0.93465 | 0.523169 | 9.123924 | -14.6217 | 1.79E-24 | 1.26E-21  | 45.25725 |
| CRYL1    | -0.87579 | 0.544955 | 10.96177 | -14.5759 | 2.16E-24 | 1.40E-21  | 45.07436 |
| TKFC     | -1.27369 | 0.413601 | 6.800127 | -14.4798 | 3.19E-24 | 1.93E-21  | 44.68937 |
| UPB1     | -1.6622  | 0.315957 | 8.193924 | -14.2933 | 6.82E-24 | 3.84E-21  | 43.93903 |
| HDAC6    | -0.76596 | 0.588064 | 7.975696 | -14.239  | 8.52E-24 | 4.50E-21  | 43.71975 |
| HLA-DMA  | 1.503129 | 2.834568 | 8.475063 | 14.22155 | 9.15E-24 | 4.52E-21  | 43.64909 |
| ECHDC2   | -0.66067 | 0.632586 | 10.33772 | -14.2094 | 9.62E-24 | 4.52E-21  | 43.59991 |
| TNFAIP8  | 1.667536 | 3.176716 | 6.985696 | 14.17056 | 1.13E-23 | 5.02E-21  | 43.44268 |
| CTSS     | 1.627918 | 3.090667 | 5.470886 | 14.11582 | 1.41E-23 | 5.97E-21  | 43.22067 |
| CYB5A    | -0.66244 | 0.63181  | 11.77633 | -14.0122 | 2.16E-23 | 8.71E-21  | 42.79936 |
| PLSCR1   | 1.271179 | 2.413588 | 8.918608 | 13.97835 | 2.49E-23 | 9.56E-21  | 42.66147 |
| SLC25A10 | -0.88918 | 0.539922 | 6.918354 | -13.9639 | 2.64E-23 | 9.58E-21  | 42.60249 |
| ACOT13   | -1.05295 | 0.481981 | 9.721899 | -13.9569 | 2.72E-23 | 9.58E-21  | 42.57382 |
| AMT      | -0.853   | 0.553631 | 8.767595 | -13.9055 | 3.36E-23 | 1.14E-20  | 42.36429 |
| S100A11  | 1.23556  | 2.354727 | 9.261772 | 13.84791 | 4.27E-23 | 1.37E-20  | 42.12863 |
| MMP7     | 2.883379 | 7.378765 | 9.753797 | 13.83865 | 4.43E-23 | 1.37E-20  | 42.0907  |
| HLA-DMB  | 1.39726  | 2.634008 | 8.066709 | 13.83251 | 4.55E-23 | 1.37E-20  | 42.06556 |
| MAPT     | -0.92167 | 0.527899 | 7.37     | -13.8231 | 4.73E-23 | 1.38E-20  | 42.0269  |
| VIM      | 1.590435 | 3.011401 | 10.81392 | 13.79688 | 5.27E-23 | 1.49E-20  | 41.91958 |
| CLU      | 1.733248 | 3.324754 | 9.093797 | 13.69871 | 7.93E-23 | 2.16E-20  | 41.51648 |
| ALDH1L1  | -1.18194 | 0.440759 | 9.583671 | -13.6615 | 9.26E-23 | 2.45E-20  | 41.3632  |
| APOH     | -2.35253 | 0.195802 | 8.031646 | -13.653  | 9.59E-23 | 2.46E-20  | 41.32848 |
| LPCAT1   | 1.118419 | 2.171089 | 6.722405 | 13.6114  | 1.14E-22 | 2.79E-20  | 41.15694 |
| GHR      | -1.22721 | 0.427142 | 7.323671 | -13.6087 | 1.15E-22 | 2.79E-20  | 41.14588 |
| COL4A1   | 1.275323 | 2.42053  | 8.433165 | 13.48913 | 1.90E-22 | 4.47E-20  | 40.65185 |
| SERPING1 | 1.652049 | 3.142796 | 8.436835 | 13.42688 | 2.47E-22 | 5.64E-20  | 40.39398 |
| CD53     | 1.874209 | 3.666007 | 8.110506 | 13.41279 | 2.62E-22 | 5.81E-20  | 40.33554 |
| ACAA1    | -1.07428 | 0.474907 | 10.00038 | -13.4073 | 2.68E-22 | 5.81E-20  | 40.31262 |
| CD47     | 0.686943 | 1.609869 | 7.213038 | 13.3747  | 3.07E-22 | 6.27E-20  | 40.17741 |
| CDHR5    | -1.19142 | 0.437873 | 6.859494 | -13.3685 | 3.16E-22 | 6.27E-20  | 40.15171 |
| XPNPEP2  | -1.63392 | 0.322212 | 9.142911 | -13.3673 | 3.17E-22 | 6.27E-20  | 40.14651 |
| ELK3     | 0.642991 | 1.561563 | 5.187722 | 13.36126 | 3.25E-22 | 6.27E-20  | 40.1216  |
| WFDC2    | 2.51834  | 5.729225 | 9.735443 | 13.36057 | 3.26E-22 | 6.27E-20  | 40.11876 |
| CRADD    | -0.51827 | 0.698207 | 7.92481  | -13.3262 | 3.77E-22 | 7.08E-20  | 39.9757  |

|          |          |          |          |          |          |          |          |
|----------|----------|----------|----------|----------|----------|----------|----------|
| ANXA5    | 0.704519 | 1.629601 | 9.91038  | 13.31267 | 3.99E-22 | 7.33E-20 | 39.91959 |
| GPD1     | -1.12871 | 0.457325 | 8.580253 | -13.2976 | 4.25E-22 | 7.65E-20 | 39.85682 |
| AHCY     | -0.94557 | 0.519223 | 9.942405 | -13.2596 | 4.99E-22 | 8.79E-20 | 39.69881 |
| BPHL     | -1.22259 | 0.428513 | 9.137342 | -13.2459 | 5.29E-22 | 9.12E-20 | 39.64166 |
| HRSP12   | -1.13209 | 0.456253 | 11.56101 | -13.2405 | 5.41E-22 | 9.14E-20 | 39.61916 |
| PDK2     | -0.84066 | 0.558389 | 7.721013 | -13.2294 | 5.67E-22 | 9.34E-20 | 39.57277 |
| S100A10  | 0.97139  | 1.960729 | 11.05468 | 13.22611 | 5.75E-22 | 9.34E-20 | 39.55897 |
| PSMB9    | 1.853235 | 3.613093 | 7.156962 | 13.20842 | 6.19E-22 | 9.88E-20 | 39.48514 |
| MARCKS   | 0.998063 | 1.997317 | 5.534304 | 13.18794 | 6.75E-22 | 1.04E-19 | 39.39965 |
| TSPAN13  | 1.210323 | 2.313894 | 7.521013 | 13.18716 | 6.77E-22 | 1.04E-19 | 39.39641 |
| HLA-DRB1 | 1.418906 | 2.673828 | 10.83532 | 13.17825 | 7.03E-22 | 1.06E-19 | 39.3592  |
| PSMB8    | 1.376515 | 2.596404 | 7.55     | 13.16931 | 7.31E-22 | 1.08E-19 | 39.32185 |
| LAPTM5   | 2.106805 | 4.307363 | 7.598101 | 13.16584 | 7.41E-22 | 1.08E-19 | 39.30735 |
| ARPC1B   | 1.358267 | 2.563771 | 8.477595 | 13.15772 | 7.67E-22 | 1.10E-19 | 39.27339 |
| SLC12A6  | -0.90384 | 0.534462 | 6.72962  | -13.1048 | 9.60E-22 | 1.35E-19 | 39.05216 |
| LHPP     | -0.67868 | 0.624736 | 7.492152 | -13.0977 | 9.89E-22 | 1.37E-19 | 39.02227 |
| CNNM2    | -0.56078 | 0.677934 | 6.586835 | -13.0945 | 1.00E-21 | 1.37E-19 | 39.0089  |
| BHMT2    | -0.9604  | 0.513914 | 11.20165 | -13.0371 | 1.28E-21 | 1.72E-19 | 38.76842 |
| C1S      | 2.113123 | 4.326266 | 7.721392 | 13.03314 | 1.30E-21 | 1.72E-19 | 38.75174 |
| IFI16    | 1.553966 | 2.936232 | 6.433038 | 13.00475 | 1.47E-21 | 1.91E-19 | 38.6326  |
| TPBG     | 1.119466 | 2.172666 | 7.100886 | 12.98714 | 1.58E-21 | 2.01E-19 | 38.55867 |
| NMI      | 1.129908 | 2.188447 | 7.163291 | 12.9858  | 1.59E-21 | 2.01E-19 | 38.55302 |
| TGFBI    | 1.73137  | 3.32043  | 7.796709 | 12.97229 | 1.68E-21 | 2.09E-19 | 38.49626 |
| ECI2     | -0.8524  | 0.553861 | 10.39937 | -12.9542 | 1.82E-21 | 2.23E-19 | 38.42033 |
| HLA-E    | 0.869407 | 1.826912 | 9.950127 | 12.93866 | 1.94E-21 | 2.35E-19 | 38.35489 |
| PNP      | -0.89639 | 0.537229 | 9.791646 | -12.9276 | 2.04E-21 | 2.41E-19 | 38.30854 |
| FBXO7    | -0.48937 | 0.712337 | 9.979494 | -12.9206 | 2.10E-21 | 2.41E-19 | 38.27875 |
| MYOF     | 1.178281 | 2.263069 | 7.419367 | 12.91898 | 2.11E-21 | 2.41E-19 | 38.27208 |
| EAF2     | -1.10256 | 0.465689 | 8.721392 | -12.9188 | 2.11E-21 | 2.41E-19 | 38.27151 |
| LY96     | 2.215211 | 4.643494 | 5.481646 | 12.89128 | 2.38E-21 | 2.62E-19 | 38.15545 |
| CD74     | 1.227029 | 2.340844 | 9.888861 | 12.89047 | 2.39E-21 | 2.62E-19 | 38.15204 |
| CTH      | -0.98705 | 0.504509 | 6.765949 | -12.8898 | 2.39E-21 | 2.62E-19 | 38.14926 |
| TRIM22   | 1.680837 | 3.206138 | 7.818861 | 12.88712 | 2.42E-21 | 2.62E-19 | 38.1379  |
| GADD45A  | -1.27803 | 0.412358 | 10.31114 | -12.8803 | 2.49E-21 | 2.66E-19 | 38.10939 |
| ITM2C    | 1.082101 | 2.117118 | 8.986582 | 12.87556 | 2.54E-21 | 2.69E-19 | 38.08923 |
| ACTN1    | 1.219974 | 2.329425 | 7.155696 | 12.81306 | 3.32E-21 | 3.46E-19 | 37.82561 |
| PARP12   | 1.04556  | 2.064167 | 6.712405 | 12.80115 | 3.49E-21 | 3.60E-19 | 37.77531 |
| ADH6     | -1.019   | 0.493459 | 8.303038 | -12.7201 | 4.94E-21 | 4.98E-19 | 37.43265 |
| YWHAH    | 1.086324 | 2.123323 | 7.542911 | 12.71938 | 4.95E-21 | 4.98E-19 | 37.42962 |
| ARPC2    | 0.502437 | 1.416605 | 9.916835 | 12.70532 | 5.26E-21 | 5.23E-19 | 37.37009 |
| PCK2     | -1.40736 | 0.377    | 9.973418 | -12.7008 | 5.36E-21 | 5.25E-19 | 37.35103 |
| RGS10    | 1.525883 | 2.879629 | 6.498481 | 12.6992  | 5.40E-21 | 5.25E-19 | 37.34418 |
| LIPA     | 0.888959 | 1.85184  | 9.401772 | 12.68213 | 5.81E-21 | 5.58E-19 | 37.27189 |
| DPYS     | -1.32312 | 0.399669 | 10.36861 | -12.6629 | 6.31E-21 | 5.99E-19 | 37.19054 |
| PC       | -0.94918 | 0.517928 | 8.213291 | -12.6397 | 6.97E-21 | 6.54E-19 | 37.09195 |
| COL6A3   | 2.098511 | 4.282672 | 6.570506 | 12.59753 | 8.35E-21 | 7.76E-19 | 36.91301 |
| ARPC5    | 0.700751 | 1.625351 | 9.319241 | 12.57252 | 9.30E-21 | 8.54E-19 | 36.8068  |

|          |          |          |          |          |          |          |          |
|----------|----------|----------|----------|----------|----------|----------|----------|
| IFITM1   | 1.819111 | 3.528636 | 9.125316 | 12.56539 | 9.58E-21 | 8.71E-19 | 36.77649 |
| NECAP2   | 0.631238 | 1.548894 | 7.467595 | 12.55374 | 1.01E-20 | 9.06E-19 | 36.72694 |
| ARHGDI B | 1.510138 | 2.848374 | 7.898861 | 12.54858 | 1.03E-20 | 9.17E-19 | 36.705   |
| DCK      | 0.8833   | 1.84459  | 5.466582 | 12.52952 | 1.12E-20 | 9.85E-19 | 36.62395 |
| C2orf47  | -0.5624  | 0.677173 | 9.340506 | -12.5054 | 1.24E-20 | 1.08E-18 | 36.52146 |
| DCXR     | -1.41625 | 0.374686 | 11.21101 | -12.4862 | 1.35E-20 | 1.16E-18 | 36.43936 |
| HPGD     | -1.48743 | 0.356647 | 7.90519  | -12.4758 | 1.41E-20 | 1.20E-18 | 36.39522 |
| DNPH1    | -0.63682 | 0.64313  | 9.758987 | -12.4715 | 1.44E-20 | 1.21E-18 | 36.37702 |
| ACOX2    | -1.15797 | 0.448142 | 9.007595 | -12.4541 | 1.55E-20 | 1.30E-18 | 36.30257 |
| NNMT     | 2.824177 | 7.082097 | 7.614937 | 12.43686 | 1.67E-20 | 1.38E-18 | 36.22921 |
| GCHFR    | -0.78602 | 0.579941 | 8.562532 | -12.4332 | 1.69E-20 | 1.39E-18 | 36.21372 |
| MSRA     | -1.0094  | 0.496753 | 10.65987 | -12.4299 | 1.72E-20 | 1.40E-18 | 36.19961 |
| ALDH6A1  | -1.26454 | 0.416232 | 10.82025 | -12.419  | 1.80E-20 | 1.45E-18 | 36.15309 |
| COL4A2   | 1.151937 | 2.22212  | 7.753797 | 12.39345 | 2.01E-20 | 1.60E-18 | 36.04397 |
| HLA-DPA1 | 1.767292 | 3.404145 | 9.983671 | 12.38042 | 2.13E-20 | 1.67E-18 | 35.98833 |
| CASP1    | 1.446014 | 2.724543 | 5.314684 | 12.37937 | 2.14E-20 | 1.67E-18 | 35.98385 |
| LYZ      | 3.083228 | 8.475086 | 6.762278 | 12.3747  | 2.18E-20 | 1.67E-18 | 35.96389 |
| VEGFA    | -0.80362 | 0.572909 | 7.141266 | -12.3734 | 2.19E-20 | 1.67E-18 | 35.95814 |
| ALDH2    | -0.58393 | 0.667146 | 11.39304 | -12.3733 | 2.19E-20 | 1.67E-18 | 35.95782 |
| CHPT1    | -0.69771 | 0.616551 | 9.438987 | -12.3688 | 2.24E-20 | 1.69E-18 | 35.93861 |
| TES      | 0.857404 | 1.811776 | 6.837722 | 12.35086 | 2.42E-20 | 1.81E-18 | 35.862   |
| AZGP1    | -1.64496 | 0.319755 | 9.768734 | -12.3437 | 2.49E-20 | 1.85E-18 | 35.8312  |
| C1QA     | 2.051436 | 4.145184 | 6.79519  | 12.33012 | 2.64E-20 | 1.94E-18 | 35.7733  |
| GSTA1    | -1.68038 | 0.312    | 11.71633 | -12.327  | 2.68E-20 | 1.95E-18 | 35.75987 |
| SLC13A3  | -1.17769 | 0.442057 | 10.08544 | -12.3123 | 2.85E-20 | 2.06E-18 | 35.69721 |
| STUB1    | -0.37486 | 0.771179 | 9.396456 | -12.3074 | 2.91E-20 | 2.09E-18 | 35.67626 |
| TUBA1A   | 1.423979 | 2.683245 | 9.935696 | 12.30516 | 2.94E-20 | 2.09E-18 | 35.66649 |
| PEPD     | -1.00931 | 0.496784 | 11.29861 | -12.2909 | 3.13E-20 | 2.21E-18 | 35.60557 |
| PROM1    | 2.21002  | 4.626816 | 8.178608 | 12.26874 | 3.45E-20 | 2.41E-18 | 35.51055 |
| ALPL     | -0.99348 | 0.502265 | 5.828481 | -12.2654 | 3.50E-20 | 2.42E-18 | 35.49615 |
| GRPEL1   | -0.66313 | 0.631507 | 8.625823 | -12.2636 | 3.52E-20 | 2.42E-18 | 35.4887  |
| CPVL     | 1.032088 | 2.044982 | 8.428734 | 12.24752 | 3.78E-20 | 2.58E-18 | 35.41963 |
| GALK1    | -0.72653 | 0.604354 | 6.676076 | -12.2423 | 3.86E-20 | 2.61E-18 | 35.39734 |
| DHRS3    | -0.70831 | 0.612038 | 8.773038 | -12.2157 | 4.34E-20 | 2.91E-18 | 35.28331 |
| HYAL1    | -0.83424 | 0.560877 | 9.331519 | -12.2065 | 4.51E-20 | 3.00E-18 | 35.2436  |
| CKLF     | 1.371469 | 2.587339 | 6.803544 | 12.19399 | 4.77E-20 | 3.15E-18 | 35.19001 |
| SLC37A4  | -0.94013 | 0.521185 | 9.627722 | -12.19   | 4.85E-20 | 3.18E-18 | 35.17274 |
| VCAN     | 2.007227 | 4.020087 | 5.249114 | 12.18832 | 4.88E-20 | 3.18E-18 | 35.16563 |
| C11orf71 | -0.86689 | 0.548327 | 7.23962  | -12.1277 | 6.35E-20 | 4.10E-18 | 34.90522 |
| TAP1     | 1.045244 | 2.063715 | 7.305316 | 12.11406 | 6.74E-20 | 4.32E-18 | 34.84652 |
| SHMT1    | -0.97426 | 0.509002 | 9.906076 | -12.1048 | 7.02E-20 | 4.46E-18 | 34.8066  |
| DNMT1    | 0.767451 | 1.702259 | 6.419494 | 12.09019 | 7.48E-20 | 4.72E-18 | 34.74382 |
| RAB27A   | 0.783827 | 1.721692 | 6.183291 | 12.07855 | 7.87E-20 | 4.93E-18 | 34.69373 |
| HADH     | -0.92892 | 0.525252 | 9.942405 | -12.0619 | 8.46E-20 | 5.26E-18 | 34.6221  |
| PXDN     | 1.31413  | 2.486524 | 6.28481  | 12.05129 | 8.86E-20 | 5.47E-18 | 34.57632 |
| ITGB2    | 1.631798 | 3.098991 | 6.256203 | 12.02319 | 1.00E-19 | 6.13E-18 | 34.45521 |
| TYROBP   | 2.11726  | 4.33869  | 7.247468 | 12.01509 | 1.04E-19 | 6.31E-18 | 34.42031 |



|           |          |          |          |          |          |          |          |
|-----------|----------|----------|----------|----------|----------|----------|----------|
| PRODH2    | -1.37536 | 0.385456 | 10.80418 | -12.0117 | 1.05E-19 | 6.36E-18 | 34.40571 |
| TPM1      | 1.016179 | 2.022555 | 8.917089 | 12.00738 | 1.07E-19 | 6.42E-18 | 34.38706 |
| FTCD      | -1.39675 | 0.379783 | 8.706329 | -12.0063 | 1.08E-19 | 6.42E-18 | 34.38237 |
| RAB11FIP3 | -1.0764  | 0.47421  | 7.999494 | -11.9919 | 1.15E-19 | 6.79E-18 | 34.3201  |
| HLA-C     | 0.894862 | 1.859432 | 11.79076 | 11.98091 | 1.20E-19 | 7.04E-18 | 34.27285 |
| PKLR      | -0.76795 | 0.587251 | 6.455949 | -11.9803 | 1.21E-19 | 7.04E-18 | 34.27035 |
| EMP3      | 1.208794 | 2.311444 | 7.053418 | 11.97149 | 1.25E-19 | 7.26E-18 | 34.23221 |
| TRIOBP    | 0.496561 | 1.410847 | 7.911772 | 11.95257 | 1.36E-19 | 7.84E-18 | 34.1505  |
| S100A4    | 1.412069 | 2.661184 | 8.002025 | 11.95048 | 1.38E-19 | 7.85E-18 | 34.1415  |
| HCLS1     | 1.693636 | 3.23471  | 6.467468 | 11.94748 | 1.39E-19 | 7.88E-18 | 34.12854 |
| AUH       | -0.50535 | 0.70449  | 10.08456 | -11.9467 | 1.40E-19 | 7.88E-18 | 34.12524 |
| IDH3B     | -0.39673 | 0.75958  | 9.167975 | -11.926  | 1.53E-19 | 8.57E-18 | 34.0359  |
| PHYH      | -1.01472 | 0.494925 | 10.8357  | -11.9098 | 1.64E-19 | 9.13E-18 | 33.96576 |
| HLA-F     | 1.182451 | 2.26962  | 9.857848 | 11.90677 | 1.66E-19 | 9.20E-18 | 33.95262 |
| HDHD3     | -0.80088 | 0.574    | 7.847848 | -11.901  | 1.71E-19 | 9.37E-18 | 33.92752 |
| HLA-J     | 1.008847 | 2.012302 | 8.207722 | 11.89819 | 1.73E-19 | 9.42E-18 | 33.91552 |
| AFM       | -1.94978 | 0.258855 | 7.835316 | -11.8936 | 1.76E-19 | 9.55E-18 | 33.89586 |
| SDHB      | -0.67379 | 0.626859 | 9.313544 | -11.8758 | 1.91E-19 | 1.03E-17 | 33.81882 |
| G6PC      | -2.21359 | 0.215597 | 7.564684 | -11.859  | 2.05E-19 | 1.10E-17 | 33.74588 |
| MICU1     | -0.72629 | 0.604456 | 8.769873 | -11.8557 | 2.08E-19 | 1.11E-17 | 33.7316  |
| MNS1      | 1.114796 | 2.165644 | 5.587848 | 11.83108 | 2.32E-19 | 1.22E-17 | 33.62505 |
| NIT1      | -0.52138 | 0.696707 | 8.200253 | -11.8287 | 2.34E-19 | 1.23E-17 | 33.61463 |
| LRRC23    | -0.56036 | 0.678135 | 6.288101 | -11.8146 | 2.49E-19 | 1.30E-17 | 33.55344 |
| TM4SF5    | -0.91919 | 0.528806 | 8.108861 | -11.8125 | 2.51E-19 | 1.30E-17 | 33.54459 |
| QPCT      | 1.640264 | 3.117228 | 5.364304 | 11.80871 | 2.56E-19 | 1.32E-17 | 33.52811 |
| MS4A6A    | 1.719605 | 3.293462 | 7.12962  | 11.79269 | 2.74E-19 | 1.40E-17 | 33.45867 |
| HSD17B8   | -0.50185 | 0.7062   | 8.977975 | -11.7659 | 3.08E-19 | 1.57E-17 | 33.34256 |
| OCEL1     | -0.5396  | 0.687959 | 8.163291 | -11.7609 | 3.15E-19 | 1.60E-17 | 33.32078 |
| ESYT1     | 0.729552 | 1.658124 | 7.968228 | 11.75121 | 3.29E-19 | 1.65E-17 | 33.27877 |
| ASB9      | -1.20418 | 0.434015 | 6.893291 | -11.7323 | 3.57E-19 | 1.79E-17 | 33.19646 |
| LTF       | 3.889394 | 14.81918 | 8.414684 | 11.72708 | 3.66E-19 | 1.82E-17 | 33.17401 |
| LAPTM4B   | 0.668445 | 1.589359 | 9.778354 | 11.69174 | 4.27E-19 | 2.11E-17 | 33.02048 |
| CAMK2G    | -0.51746 | 0.698599 | 6.947975 | -11.6884 | 4.33E-19 | 2.13E-17 | 33.0061  |
| COL3A1    | 2.30971  | 4.957835 | 7.541772 | 11.6754  | 4.59E-19 | 2.24E-17 | 32.94945 |
| C1R       | 1.692253 | 3.23161  | 7.776456 | 11.67411 | 4.61E-19 | 2.24E-17 | 32.94385 |
| SUCLG1    | -0.69067 | 0.619565 | 12.05671 | -11.6587 | 4.93E-19 | 2.38E-17 | 32.87693 |
| CLIC1     | 0.689598 | 1.612834 | 10.12089 | 11.65488 | 5.02E-19 | 2.40E-17 | 32.8602  |
| PXMP2     | -0.88623 | 0.541025 | 9.179367 | -11.6546 | 5.02E-19 | 2.40E-17 | 32.85912 |
| TRPM3     | -0.79634 | 0.575807 | 6.992785 | -11.6373 | 5.42E-19 | 2.57E-17 | 32.78369 |
| SH2B3     | 0.873564 | 1.832183 | 7.231646 | 11.63621 | 5.45E-19 | 2.57E-17 | 32.779   |
| ETFB      | -0.59335 | 0.662804 | 9.92519  | -11.633  | 5.53E-19 | 2.60E-17 | 32.76497 |
| CTSV      | -1.59865 | 0.330186 | 8.270253 | -11.6212 | 5.82E-19 | 2.72E-17 | 32.71348 |
| SLC25A1   | -0.67941 | 0.624419 | 8.150759 | -11.6147 | 5.99E-19 | 2.78E-17 | 32.68537 |
| CD48      | 2.175428 | 4.517198 | 6.72481  | 11.61204 | 6.06E-19 | 2.80E-17 | 32.67377 |
| RBKS      | -0.57814 | 0.669829 | 8.977848 | -11.6109 | 6.09E-19 | 2.80E-17 | 32.66888 |
| ANXA1     | 1.715949 | 3.285126 | 7.532658 | 11.60785 | 6.17E-19 | 2.82E-17 | 32.65553 |
| MME       | -1.46833 | 0.3614   | 10.19165 | -11.5914 | 6.64E-19 | 3.02E-17 | 32.58378 |

|          |          |          |          |          |          |          |          |
|----------|----------|----------|----------|----------|----------|----------|----------|
| UCP2     | 1.058906 | 2.083352 | 7.074937 | 11.56592 | 7.42E-19 | 3.36E-17 | 32.47287 |
| DSE      | 1.101476 | 2.145741 | 7.039241 | 11.5595  | 7.64E-19 | 3.43E-17 | 32.44492 |
| KIAA1551 | 0.81643  | 1.761042 | 6.245823 | 11.5517  | 7.90E-19 | 3.53E-17 | 32.4109  |
| ECSIT    | -0.54187 | 0.68688  | 6.795823 | -11.5477 | 8.04E-19 | 3.58E-17 | 32.39339 |
| GLYAT    | -1.21067 | 0.432069 | 10.15797 | -11.532  | 8.62E-19 | 3.81E-17 | 32.32519 |
| ETNK2    | -1.13213 | 0.456242 | 7.148608 | -11.5237 | 8.94E-19 | 3.94E-17 | 32.28872 |
| METTL21B | -1.03022 | 0.489634 | 7.551392 | -11.5037 | 9.76E-19 | 4.28E-17 | 32.20155 |
| ACSF2    | -1.03094 | 0.48939  | 9.376962 | -11.4975 | 1.00E-18 | 4.37E-17 | 32.17434 |
| SLC22A8  | -1.48776 | 0.356566 | 9.931139 | -11.4965 | 1.01E-18 | 4.37E-17 | 32.16999 |
| CRYM     | -1.02539 | 0.491278 | 10.66646 | -11.4894 | 1.04E-18 | 4.49E-17 | 32.13896 |
| ST13     | -0.50416 | 0.705069 | 10.53114 | -11.4882 | 1.05E-18 | 4.49E-17 | 32.13383 |
| ACTR3    | 0.561324 | 1.475623 | 8.548608 | 11.48407 | 1.06E-18 | 4.55E-17 | 32.11583 |
| EPHX1    | -1.00823 | 0.497157 | 8.879494 | -11.4738 | 1.11E-18 | 4.73E-17 | 32.07114 |
| C2CD2    | 0.683603 | 1.606146 | 6.693165 | 11.45941 | 1.19E-18 | 5.02E-17 | 32.00808 |
| PSMB10   | 1.264756 | 2.402866 | 6.75962  | 11.45836 | 1.19E-18 | 5.02E-17 | 32.00352 |
| GLRX     | -0.49159 | 0.711242 | 10.21139 | -11.4534 | 1.22E-18 | 5.10E-17 | 31.98184 |
| KMO      | -1.14689 | 0.451597 | 8.862658 | -11.4451 | 1.26E-18 | 5.24E-17 | 31.94555 |
| PHF11    | 0.625356 | 1.542591 | 8.544051 | 11.44495 | 1.27E-18 | 5.24E-17 | 31.94493 |
| DDC      | -1.15312 | 0.449651 | 10.10962 | -11.435  | 1.32E-18 | 5.45E-17 | 31.90151 |
| ANKRD46  | -0.74474 | 0.596777 | 8.453038 | -11.4217 | 1.40E-18 | 5.75E-17 | 31.84333 |
| SLC22A6  | -1.35191 | 0.391773 | 9.426582 | -11.4102 | 1.48E-18 | 6.02E-17 | 31.79319 |
| TNC      | 1.586785 | 3.003793 | 6.005443 | 11.39901 | 1.55E-18 | 6.30E-17 | 31.74405 |
| RABGGTB  | -0.56632 | 0.675338 | 7.982785 | -11.3904 | 1.61E-18 | 6.51E-17 | 31.70643 |
| MRPS15   | -0.43895 | 0.737673 | 7.523165 | -11.3865 | 1.64E-18 | 6.59E-17 | 31.68946 |
| PECAM1   | 1.05832  | 2.082505 | 7.130127 | 11.38322 | 1.66E-18 | 6.64E-17 | 31.67495 |
| RTP4     | 1.017345 | 2.024191 | 5.688228 | 11.38286 | 1.67E-18 | 6.64E-17 | 31.67336 |
| PYCARD   | 1.455165 | 2.741879 | 5.47481  | 11.38037 | 1.68E-18 | 6.68E-17 | 31.66248 |
| ANXA2P2  | 0.78334  | 1.721111 | 6.255696 | 11.36195 | 1.83E-18 | 7.21E-17 | 31.58185 |
| GBP2     | 1.35695  | 2.561431 | 5.521392 | 11.35554 | 1.88E-18 | 7.39E-17 | 31.55376 |
| GALNT3   | 0.786798 | 1.725242 | 6.078228 | 11.32998 | 2.10E-18 | 8.22E-17 | 31.4418  |
| SPAG5    | -0.89533 | 0.537624 | 7.707089 | -11.3294 | 2.11E-18 | 8.22E-17 | 31.43947 |
| TLR2     | 0.811574 | 1.755126 | 5.805316 | 11.30176 | 2.38E-18 | 9.24E-17 | 31.31813 |
| HSD17B14 | -0.942   | 0.52051  | 7.729114 | -11.2928 | 2.48E-18 | 9.57E-17 | 31.27887 |
| STAT1    | 1.185567 | 2.274527 | 7.279367 | 11.2849  | 2.57E-18 | 9.87E-17 | 31.24421 |
| SFXN1    | -0.68989 | 0.619899 | 7.877468 | -11.2835 | 2.58E-18 | 9.89E-17 | 31.23805 |
| METTL1   | -0.77661 | 0.583735 | 7.983418 | -11.2796 | 2.63E-18 | 1.00E-16 | 31.22077 |
| UBE2L6   | 1.024651 | 2.034467 | 8.023671 | 11.26602 | 2.79E-18 | 1.06E-16 | 31.16141 |
| ABCC6    | -0.9417  | 0.520619 | 6.899241 | -11.2641 | 2.82E-18 | 1.06E-16 | 31.15288 |
| IQGAP1   | 0.623412 | 1.540515 | 7.862152 | 11.26274 | 2.83E-18 | 1.06E-16 | 31.14701 |
| XRCC5    | 0.442437 | 1.358898 | 9.581772 | 11.25367 | 2.95E-18 | 1.10E-16 | 31.10721 |
| CES2     | -0.79082 | 0.578017 | 9.578354 | -11.2492 | 3.01E-18 | 1.12E-16 | 31.08742 |
| FAH      | -0.84911 | 0.555127 | 8.559873 | -11.249  | 3.01E-18 | 1.12E-16 | 31.0869  |
| ALDH7A1  | -0.59052 | 0.664103 | 6.213544 | -11.2323 | 3.24E-18 | 1.20E-16 | 31.01346 |
| HRG      | -1.39023 | 0.381504 | 8.232532 | -11.2297 | 3.28E-18 | 1.21E-16 | 31.00178 |
| CKAP4    | 0.586153 | 1.501238 | 7.693544 | 11.22652 | 3.33E-18 | 1.22E-16 | 30.98802 |
| BDH2     | -0.64628 | 0.638927 | 10.74025 | -11.2216 | 3.40E-18 | 1.24E-16 | 30.9663  |
| SERPINA6 | -1.43318 | 0.370315 | 8.43481  | -11.1778 | 4.13E-18 | 1.50E-16 | 30.77403 |

|           |          |          |          |          |          |          |          |
|-----------|----------|----------|----------|----------|----------|----------|----------|
| GPS1      | -0.53125 | 0.691957 | 7.735696 | -11.1685 | 4.30E-18 | 1.56E-16 | 30.73326 |
| RUNDC3B   | -0.73428 | 0.60112  | 5.660886 | -11.1645 | 4.38E-18 | 1.58E-16 | 30.71548 |
| PDLIM1    | 0.884697 | 1.846377 | 9.434557 | 11.15281 | 4.62E-18 | 1.65E-16 | 30.66412 |
| SCRN1     | 0.804717 | 1.746803 | 7.536582 | 11.152   | 4.63E-18 | 1.65E-16 | 30.66056 |
| TREH      | -1.76458 | 0.294311 | 6.732025 | -11.148  | 4.72E-18 | 1.68E-16 | 30.6428  |
| IFNGR1    | 0.719717 | 1.646859 | 8.066076 | 11.14449 | 4.79E-18 | 1.69E-16 | 30.62752 |
| EVI2A     | 1.91643  | 3.774877 | 5.635316 | 11.13797 | 4.93E-18 | 1.74E-16 | 30.59887 |
| PLOD1     | -0.62974 | 0.646294 | 7.746076 | -11.129  | 5.13E-18 | 1.80E-16 | 30.55961 |
| CCDC109B  | 1.03529  | 2.049525 | 5.650506 | 11.12474 | 5.23E-18 | 1.83E-16 | 30.54064 |
| TLE1      | 0.531542 | 1.445473 | 6.095949 | 11.11905 | 5.36E-18 | 1.87E-16 | 30.51563 |
| FBP1      | -1.2606  | 0.41737  | 10.9319  | -11.1176 | 5.40E-18 | 1.87E-16 | 30.50927 |
| CAT       | -0.63227 | 0.645162 | 10.97937 | -11.1141 | 5.48E-18 | 1.88E-16 | 30.49385 |
| HOPX      | 1.849321 | 3.603307 | 6.359241 | 11.11402 | 5.48E-18 | 1.88E-16 | 30.49349 |
| C4orf27   | 0.49083  | 1.405253 | 7.873291 | 11.09102 | 6.07E-18 | 2.08E-16 | 30.39225 |
| LYRM1     | -0.43214 | 0.741161 | 9.634051 | -11.0901 | 6.10E-18 | 2.08E-16 | 30.388   |
| KHK       | -0.93795 | 0.521974 | 9.644937 | -11.0833 | 6.29E-18 | 2.13E-16 | 30.35807 |
| LYN       | 1.019789 | 2.027623 | 5.844684 | 11.07147 | 6.63E-18 | 2.24E-16 | 30.30613 |
| ITGB6     | 1.953775 | 3.873868 | 5.604177 | 11.05415 | 7.16E-18 | 2.41E-16 | 30.22985 |
| CFDP1     | -0.70036 | 0.61542  | 9.38962  | -11.0488 | 7.33E-18 | 2.46E-16 | 30.20613 |
| ECHS1     | -0.6002  | 0.659664 | 11.96494 | -11.048  | 7.36E-18 | 2.46E-16 | 30.20288 |
| FSTL1     | 1.160586 | 2.235483 | 8.959367 | 11.03869 | 7.67E-18 | 2.55E-16 | 30.16171 |
| SEMA3B    | -0.63843 | 0.642411 | 7.141139 | -11.037  | 7.73E-18 | 2.56E-16 | 30.1543  |
| MAOB      | -0.66926 | 0.628831 | 10.70848 | -11.0325 | 7.88E-18 | 2.60E-16 | 30.13428 |
| MPZL1     | 0.450929 | 1.36692  | 6.943797 | 11.02285 | 8.23E-18 | 2.71E-16 | 30.09186 |
| SP110     | 0.626686 | 1.544015 | 6.497215 | 11.01919 | 8.36E-18 | 2.74E-16 | 30.07572 |
| TBC1D13   | -0.50595 | 0.704197 | 7.612785 | -10.9837 | 9.80E-18 | 3.20E-16 | 29.91905 |
| IFITM2    | 1.293775 | 2.451687 | 9.328481 | 10.97974 | 9.97E-18 | 3.24E-16 | 29.90172 |
| CD44      | 0.962424 | 1.948581 | 5.972025 | 10.9785  | 1.00E-17 | 3.24E-16 | 29.89625 |
| SLC25A44  | -0.5516  | 0.682263 | 7.889367 | -10.9785 | 1.00E-17 | 3.24E-16 | 29.89611 |
| AKR1B1    | 0.764519 | 1.698804 | 9.625443 | 10.96765 | 1.05E-17 | 3.38E-16 | 29.84837 |
| S100A6    | 0.965797 | 1.953142 | 10.0043  | 10.96699 | 1.06E-17 | 3.38E-16 | 29.84546 |
| PDE10A    | -0.33292 | 0.793925 | 4.746582 | -10.9407 | 1.19E-17 | 3.79E-16 | 29.72936 |
| PARP8     | 0.631232 | 1.548887 | 6.099114 | 10.92476 | 1.27E-17 | 4.05E-16 | 29.659   |
| CCNB1IP1  | -0.64073 | 0.641388 | 9.191266 | -10.9216 | 1.29E-17 | 4.09E-16 | 29.64513 |
| CALM2     | 0.401607 | 1.320979 | 12.69646 | 10.91393 | 1.34E-17 | 4.22E-16 | 29.61114 |
| SPON2     | 1.480316 | 2.790099 | 7.465316 | 10.91299 | 1.34E-17 | 4.22E-16 | 29.60698 |
| NFS1      | -0.64706 | 0.638582 | 8.519494 | -10.9119 | 1.35E-17 | 4.22E-16 | 29.60233 |
| CFB       | 1.762378 | 3.392569 | 7.616835 | 10.90725 | 1.38E-17 | 4.30E-16 | 29.58165 |
| HLA-A     | 0.881028 | 1.841687 | 12.29063 | 10.90584 | 1.39E-17 | 4.31E-16 | 29.57538 |
| FDX1      | -0.65244 | 0.636205 | 9.020506 | -10.9023 | 1.41E-17 | 4.36E-16 | 29.55992 |
| ECH1      | -0.43603 | 0.739167 | 11.30025 | -10.8899 | 1.49E-17 | 4.59E-16 | 29.50505 |
| RAB11FIP5 | -0.54626 | 0.684791 | 8.018987 | -10.8885 | 1.50E-17 | 4.60E-16 | 29.49895 |
| DIP2C     | -0.8691  | 0.547489 | 8.298481 | -10.8781 | 1.57E-17 | 4.80E-16 | 29.45288 |
| BLNK      | 0.914236 | 1.884571 | 7.543418 | 10.87684 | 1.58E-17 | 4.80E-16 | 29.44724 |
| FABP1     | -1.63947 | 0.320974 | 10.74342 | -10.8767 | 1.58E-17 | 4.80E-16 | 29.44681 |
| CMTM6     | 0.639835 | 1.558151 | 9.125316 | 10.85806 | 1.72E-17 | 5.20E-16 | 29.36416 |
| ALOX5AP   | 1.400922 | 2.640703 | 6.732152 | 10.84686 | 1.80E-17 | 5.45E-16 | 29.31463 |

|          |          |          |          |          |          |          |          |
|----------|----------|----------|----------|----------|----------|----------|----------|
| NCF2     | 1.148617 | 2.217012 | 5.109367 | 10.84059 | 1.86E-17 | 5.57E-16 | 29.28687 |
| PTPRC    | 1.35087  | 2.550658 | 5.153418 | 10.84018 | 1.86E-17 | 5.57E-16 | 29.28508 |
| C3       | 2.445296 | 5.446375 | 8.657975 | 10.83893 | 1.87E-17 | 5.58E-16 | 29.27955 |
| CASP4    | 0.905059 | 1.872621 | 6.389367 | 10.83766 | 1.88E-17 | 5.60E-16 | 29.27394 |
| SELENBP1 | -1.02545 | 0.491255 | 8.821646 | -10.8286 | 1.96E-17 | 5.81E-16 | 29.23381 |
| S100A13  | 0.979947 | 1.972393 | 9.131519 | 10.82788 | 1.96E-17 | 5.81E-16 | 29.23065 |
| GPR137B  | -0.87329 | 0.545902 | 9.454557 | -10.8258 | 1.98E-17 | 5.84E-16 | 29.22164 |
| HAAO     | -0.65167 | 0.636545 | 7.702785 | -10.822  | 2.02E-17 | 5.92E-16 | 29.20485 |
| H2AFY    | 0.413505 | 1.331917 | 8.513165 | 10.8175  | 2.06E-17 | 6.02E-16 | 29.18474 |
| POLD3    | -0.84302 | 0.557474 | 7.476329 | -10.8109 | 2.12E-17 | 6.18E-16 | 29.15558 |
| C1QB     | 2.112727 | 4.325081 | 6.422532 | 10.80798 | 2.15E-17 | 6.24E-16 | 29.14259 |
| ITGAV    | 0.782477 | 1.720082 | 9.354684 | 10.80728 | 2.15E-17 | 6.24E-16 | 29.13947 |
| GRHPR    | -0.71552 | 0.608985 | 10.36633 | -10.8023 | 2.20E-17 | 6.33E-16 | 29.11759 |
| KLK1     | -2.0001  | 0.249983 | 8.187342 | -10.8023 | 2.20E-17 | 6.33E-16 | 29.11742 |
| PLG      | -2.02401 | 0.245875 | 10.02975 | -10.7981 | 2.24E-17 | 6.43E-16 | 29.09892 |
| AKR1A1   | -0.70559 | 0.61319  | 11.74722 | -10.7917 | 2.31E-17 | 6.59E-16 | 29.07052 |
| PAFAH1B3 | 0.541601 | 1.455587 | 7.096456 | 10.78929 | 2.33E-17 | 6.64E-16 | 29.05982 |
| PIPOX    | -1.21756 | 0.430009 | 10.09835 | -10.7797 | 2.44E-17 | 6.91E-16 | 29.01744 |
| RAC2     | 1.366785 | 2.578953 | 6.853544 | 10.76909 | 2.55E-17 | 7.22E-16 | 28.97034 |
| LGALS1   | 1.374644 | 2.59304  | 8.661392 | 10.76066 | 2.65E-17 | 7.48E-16 | 28.933   |
| CLPP     | -0.38717 | 0.764626 | 8.365443 | -10.7537 | 2.74E-17 | 7.69E-16 | 28.90198 |
| IL10RA   | 1.301924 | 2.465574 | 5.749494 | 10.75126 | 2.77E-17 | 7.75E-16 | 28.89134 |
| TUBG1    | -0.73746 | 0.599793 | 7.966076 | -10.7478 | 2.81E-17 | 7.84E-16 | 28.87592 |
| ALAD     | -0.82747 | 0.563516 | 7.43     | -10.7463 | 2.83E-17 | 7.87E-16 | 28.86957 |
| ASPA     | -1.20985 | 0.432314 | 9.05962  | -10.7431 | 2.87E-17 | 7.96E-16 | 28.85497 |
| PPP1R16B | -1.19053 | 0.438143 | 8.28443  | -10.742  | 2.88E-17 | 7.97E-16 | 28.85016 |
| NET1     | -0.83293 | 0.561387 | 8.319241 | -10.7345 | 2.98E-17 | 8.21E-16 | 28.81728 |
| TRAC     | 1.558874 | 2.946237 | 6.561392 | 10.69616 | 3.54E-17 | 9.72E-16 | 28.64709 |
| GALNT1   | 0.738636 | 1.668598 | 7.513544 | 10.69038 | 3.63E-17 | 9.92E-16 | 28.62142 |
| CIDEB    | -0.71502 | 0.609197 | 8.480886 | -10.6902 | 3.64E-17 | 9.92E-16 | 28.62065 |
| HLA-G    | 0.523577 | 1.437515 | 8.412405 | 10.68694 | 3.69E-17 | 1.00E-15 | 28.60618 |
| CYBB     | 1.242003 | 2.365266 | 5.576203 | 10.68633 | 3.70E-17 | 1.00E-15 | 28.60346 |
| DEK      | 0.512688 | 1.426706 | 9.453291 | 10.68621 | 3.70E-17 | 1.00E-15 | 28.60291 |
| PEX5     | -0.42196 | 0.746412 | 6.915696 | -10.6772 | 3.85E-17 | 1.04E-15 | 28.56315 |
| PLAC8    | 1.759901 | 3.386749 | 5.147975 | 10.67347 | 3.92E-17 | 1.05E-15 | 28.54639 |
| APMAP    | 0.462095 | 1.377541 | 8.709114 | 10.67184 | 3.95E-17 | 1.06E-15 | 28.53918 |
| CALML3   | -1.44808 | 0.366508 | 6.132278 | -10.6699 | 3.98E-17 | 1.06E-15 | 28.53062 |
| ASS1     | -1.22063 | 0.429095 | 12.1662  | -10.6682 | 4.01E-17 | 1.07E-15 | 28.5229  |
| LXN      | 0.702213 | 1.626999 | 7.682025 | 10.65367 | 4.28E-17 | 1.14E-15 | 28.45853 |
| FAM129A  | 0.897332 | 1.862618 | 4.971139 | 10.64788 | 4.40E-17 | 1.16E-15 | 28.43282 |
| SS18L1   | -0.60659 | 0.656745 | 6.679873 | -10.6364 | 4.63E-17 | 1.22E-15 | 28.38194 |
| CRIP2    | 0.910007 | 1.879054 | 7.108608 | 10.63293 | 4.70E-17 | 1.23E-15 | 28.36644 |
| RRAS     | 0.798004 | 1.738694 | 6.43443  | 10.61935 | 5.00E-17 | 1.31E-15 | 28.30614 |
| GIMAP4   | 0.968992 | 1.957473 | 6.947595 | 10.60518 | 5.33E-17 | 1.39E-15 | 28.24321 |
| TGFBR2   | 0.493123 | 1.407488 | 7.054684 | 10.59928 | 5.47E-17 | 1.42E-15 | 28.21697 |
| FUZ      | -0.66447 | 0.630922 | 6.644177 | -10.5835 | 5.87E-17 | 1.52E-15 | 28.1469  |
| SNX5     | -0.464   | 0.724974 | 9.849873 | -10.5816 | 5.92E-17 | 1.53E-15 | 28.1384  |

|          |          |          |          |          |          |          |          |
|----------|----------|----------|----------|----------|----------|----------|----------|
| RNASE6   | 1.739407 | 3.338979 | 6.293544 | 10.58076 | 5.94E-17 | 1.53E-15 | 28.13471 |
| TGFBR3   | -0.94233 | 0.520391 | 8.415063 | -10.5792 | 5.99E-17 | 1.54E-15 | 28.12765 |
| GRAMD1B  | -0.94408 | 0.519759 | 7.609114 | -10.5687 | 6.27E-17 | 1.60E-15 | 28.08124 |
| RPS19    | 0.486693 | 1.401229 | 12.90722 | 10.56839 | 6.28E-17 | 1.60E-15 | 28.07972 |
| ACO1     | -0.77219 | 0.585529 | 10.03266 | -10.5659 | 6.35E-17 | 1.62E-15 | 28.06875 |
| AMMECR1  | 0.506482 | 1.420582 | 5.764177 | 10.56553 | 6.36E-17 | 1.62E-15 | 28.06698 |
| ISOC2    | -0.75603 | 0.592124 | 8.746582 | -10.5586 | 6.57E-17 | 1.66E-15 | 28.03602 |
| PSME1    | 0.433735 | 1.350726 | 10.13835 | 10.55722 | 6.61E-17 | 1.67E-15 | 28.03007 |
| IRF7     | 0.848452 | 1.800568 | 6.032025 | 10.55449 | 6.69E-17 | 1.68E-15 | 28.01792 |
| QDPR     | -0.80044 | 0.574173 | 10.63759 | -10.5541 | 6.70E-17 | 1.68E-15 | 28.0163  |
| CD63     | 0.408986 | 1.327752 | 11.66519 | 10.54681 | 6.92E-17 | 1.73E-15 | 27.98376 |
| IVD      | -0.65657 | 0.634383 | 7.96443  | -10.5438 | 7.02E-17 | 1.75E-15 | 27.97036 |
| WDR13    | -0.40244 | 0.756579 | 8.794937 | -10.5331 | 7.36E-17 | 1.83E-15 | 27.92278 |
| RHOA     | 0.495105 | 1.409424 | 10.92747 | 10.52875 | 7.51E-17 | 1.86E-15 | 27.90344 |
| RAI2     | 0.697444 | 1.621629 | 6.211772 | 10.52015 | 7.80E-17 | 1.93E-15 | 27.8652  |
| MACROD1  | -0.9239  | 0.527082 | 7.544937 | -10.5178 | 7.89E-17 | 1.94E-15 | 27.85454 |
| ACBD4    | -0.46893 | 0.722499 | 6.667595 | -10.5159 | 7.95E-17 | 1.95E-15 | 27.84624 |
| SYT11    | 0.520132 | 1.434086 | 4.446835 | 10.51427 | 8.01E-17 | 1.96E-15 | 27.83904 |
| ACKR1    | 1.286772 | 2.439816 | 5.833165 | 10.51151 | 8.11E-17 | 1.98E-15 | 27.82675 |
| JAK1     | 0.628465 | 1.545919 | 8.657089 | 10.51146 | 8.11E-17 | 1.98E-15 | 27.82651 |
| DLEU1    | -0.55028 | 0.682886 | 7.47557  | -10.505  | 8.35E-17 | 2.03E-15 | 27.79784 |
| SNTA1    | -0.56477 | 0.676063 | 7.085823 | -10.5002 | 8.53E-17 | 2.07E-15 | 27.7766  |
| ALB      | -2.76862 | 0.146744 | 9.295443 | -10.498  | 8.62E-17 | 2.08E-15 | 27.76655 |
| DNAJB9   | -0.5918  | 0.663515 | 9.118228 | -10.4961 | 8.70E-17 | 2.09E-15 | 27.75796 |
| CBX6     | 0.482345 | 1.397013 | 8.159747 | 10.49432 | 8.76E-17 | 2.10E-15 | 27.75027 |
| SH3GL2   | -0.89326 | 0.538396 | 7.080127 | -10.489  | 8.98E-17 | 2.15E-15 | 27.72656 |
| NQO2     | -1.13941 | 0.453944 | 11.00861 | -10.4819 | 9.27E-17 | 2.21E-15 | 27.69478 |
| RPA3     | -0.49194 | 0.711067 | 9.103418 | -10.4806 | 9.32E-17 | 2.22E-15 | 27.68897 |
| CSF1R    | 0.956107 | 1.940067 | 6.708734 | 10.4614  | 1.02E-16 | 2.41E-15 | 27.6037  |
| CD24     | 0.614361 | 1.53088  | 10.64924 | 10.45615 | 1.04E-16 | 2.46E-15 | 27.58032 |
| CD52     | 2.075955 | 4.216235 | 6.051519 | 10.45534 | 1.04E-16 | 2.47E-15 | 27.57672 |
| SAMSN1   | 1.232767 | 2.350173 | 4.525823 | 10.44181 | 1.11E-16 | 2.61E-15 | 27.51648 |
| UBE2I    | 0.338551 | 1.264486 | 7.646203 | 10.4101  | 1.28E-16 | 3.01E-15 | 27.3752  |
| HAO2     | -1.51744 | 0.349306 | 10.03418 | -10.4084 | 1.29E-16 | 3.02E-15 | 27.36752 |
| RNASET2  | 0.799262 | 1.740211 | 8.284304 | 10.40764 | 1.29E-16 | 3.02E-15 | 27.36423 |
| CYP27B1  | -2.03045 | 0.244778 | 8.196835 | -10.4041 | 1.31E-16 | 3.06E-15 | 27.3486  |
| MLF2     | -0.51447 | 0.700052 | 8.336835 | -10.4035 | 1.32E-16 | 3.06E-15 | 27.34587 |
| TRAM1    | 0.609736 | 1.52598  | 9.98557  | 10.40219 | 1.33E-16 | 3.07E-15 | 27.33992 |
| UBE2E1   | 0.567174 | 1.481618 | 9.429747 | 10.39652 | 1.36E-16 | 3.14E-15 | 27.31467 |
| DAO      | -1.33914 | 0.395255 | 9.022785 | -10.391  | 1.40E-16 | 3.21E-15 | 27.28992 |
| PJA1     | 0.520731 | 1.434682 | 8.098608 | 10.37862 | 1.47E-16 | 3.39E-15 | 27.23488 |
| ANXA3    | 1.162418 | 2.238322 | 6.707089 | 10.37823 | 1.48E-16 | 3.39E-15 | 27.23313 |
| TPD52L1  | 0.720652 | 1.647927 | 8.10038  | 10.37366 | 1.51E-16 | 3.45E-15 | 27.21275 |
| MARCKSL1 | 0.915599 | 1.886353 | 7.598987 | 10.36542 | 1.57E-16 | 3.57E-15 | 27.176   |
| LAMC1    | 0.586831 | 1.501944 | 7.967089 | 10.35785 | 1.62E-16 | 3.67E-15 | 27.14225 |
| RAB31    | 1.012708 | 2.017694 | 6.907595 | 10.35777 | 1.62E-16 | 3.67E-15 | 27.1419  |
| ROGDI    | -0.59425 | 0.662389 | 7.613291 | -10.3392 | 1.76E-16 | 3.98E-15 | 27.05897 |

|          |          |          |          |          |          |          |          |
|----------|----------|----------|----------|----------|----------|----------|----------|
| SLC25A11 | -0.51616 | 0.699231 | 8.537215 | -10.3382 | 1.77E-16 | 3.99E-15 | 27.05455 |
| CD81     | 0.592207 | 1.507551 | 10.26759 | 10.3375  | 1.78E-16 | 3.99E-15 | 27.05147 |
| BAIAP2   | -0.63182 | 0.645363 | 5.756076 | -10.3285 | 1.85E-16 | 4.13E-15 | 27.01153 |
| MOXD1    | 1.435277 | 2.70434  | 6.430633 | 10.32852 | 1.85E-16 | 4.13E-15 | 27.01142 |
| HN1      | 0.841206 | 1.791547 | 7.532911 | 10.3201  | 1.92E-16 | 4.28E-15 | 26.97383 |
| HEXB     | 0.667042 | 1.587814 | 10.1619  | 10.31923 | 1.93E-16 | 4.29E-15 | 26.96998 |
| SDCBP    | 0.630257 | 1.547841 | 10.48392 | 10.31833 | 1.94E-16 | 4.29E-15 | 26.96597 |
| ETFA     | -0.48827 | 0.712881 | 9.895823 | -10.3169 | 1.95E-16 | 4.31E-15 | 26.95958 |
| COL1A2   | 1.63054  | 3.096289 | 6.916329 | 10.30578 | 2.05E-16 | 4.52E-15 | 26.90994 |
| EBP      | -0.59877 | 0.660318 | 8.535316 | -10.3048 | 2.06E-16 | 4.53E-15 | 26.90553 |
| HLA-DPB1 | 1.521515 | 2.870924 | 8.33557  | 10.30298 | 2.07E-16 | 4.55E-15 | 26.89743 |
| TACO1    | -0.55392 | 0.681167 | 8.054051 | -10.3015 | 2.09E-16 | 4.57E-15 | 26.89072 |
| ECHDC3   | -0.74582 | 0.596327 | 10.16367 | -10.2976 | 2.12E-16 | 4.64E-15 | 26.87345 |
| ENTPD5   | -0.92969 | 0.524971 | 8.250127 | -10.2954 | 2.15E-16 | 4.68E-15 | 26.86341 |
| PPIC     | 0.5861   | 1.501183 | 8.475696 | 10.28322 | 2.27E-16 | 4.93E-15 | 26.80922 |
| SLC2A5   | -1.1961  | 0.436454 | 8.049494 | -10.2828 | 2.27E-16 | 4.93E-15 | 26.80719 |
| KDEL3    | 0.535224 | 1.449167 | 5.766835 | 10.28144 | 2.29E-16 | 4.94E-15 | 26.80126 |
| PDIA6    | 0.490632 | 1.405061 | 9.828861 | 10.27943 | 2.31E-16 | 4.97E-15 | 26.79231 |
| HERC6    | 1.144993 | 2.211451 | 6.48481  | 10.2725  | 2.38E-16 | 5.12E-15 | 26.76136 |
| DIO1     | -1.39682 | 0.379764 | 10.17304 | -10.2686 | 2.42E-16 | 5.18E-15 | 26.74398 |
| NUP85    | 0.513327 | 1.427338 | 6.185949 | 10.2686  | 2.42E-16 | 5.18E-15 | 26.74397 |
| GCH1     | -1.07243 | 0.475517 | 8.993544 | -10.2645 | 2.47E-16 | 5.26E-15 | 26.72572 |
| SAR1B    | -0.49974 | 0.707233 | 8.261899 | -10.2644 | 2.47E-16 | 5.26E-15 | 26.72517 |
| ADI1     | -0.83086 | 0.562193 | 11.29228 | -10.2636 | 2.48E-16 | 5.26E-15 | 26.72173 |
| SLCO3A1  | 0.488399 | 1.402887 | 5.103797 | 10.25706 | 2.55E-16 | 5.41E-15 | 26.6924  |
| FCER1G   | 1.394466 | 2.628913 | 7.520759 | 10.25021 | 2.63E-16 | 5.56E-15 | 26.66182 |
| SLC22A4  | -1.03062 | 0.4895   | 7.552532 | -10.2459 | 2.68E-16 | 5.66E-15 | 26.64235 |
| BTN2A2   | 0.45004  | 1.366078 | 5.578861 | 10.23557 | 2.81E-16 | 5.90E-15 | 26.59644 |
| LUM      | 1.786014 | 3.448609 | 8.636709 | 10.23547 | 2.81E-16 | 5.90E-15 | 26.59596 |
| TXNDC9   | 0.472345 | 1.387363 | 8.79557  | 10.23313 | 2.84E-16 | 5.93E-15 | 26.58553 |
| GJB1     | -0.65092 | 0.636876 | 7.88962  | -10.2331 | 2.84E-16 | 5.93E-15 | 26.5853  |
| MCUR1    | -0.69873 | 0.616115 | 8.56443  | -10.2325 | 2.85E-16 | 5.94E-15 | 26.5825  |
| ABAT     | -0.9784  | 0.507543 | 9.641519 | -10.2221 | 2.99E-16 | 6.20E-15 | 26.53638 |
| FXD5     | 1.019328 | 2.026975 | 6.131013 | 10.2218  | 2.99E-16 | 6.20E-15 | 26.53487 |
| A2M      | 1.213755 | 2.319405 | 10.02962 | 10.21302 | 3.11E-16 | 6.43E-15 | 26.49565 |
| LGALS3BP | 0.677484 | 1.599348 | 8.694304 | 10.20961 | 3.16E-16 | 6.52E-15 | 26.48043 |
| BNIP3    | -0.54572 | 0.685047 | 10.04443 | -10.1904 | 3.45E-16 | 7.09E-15 | 26.39469 |
| APOBEC3C | 1.169144 | 2.248782 | 5.906203 | 10.18977 | 3.46E-16 | 7.09E-15 | 26.39173 |
| DHRS11   | -0.60903 | 0.65564  | 6.16038  | -10.1884 | 3.48E-16 | 7.12E-15 | 26.38558 |
| AKR7A3   | -1.09564 | 0.467929 | 9.894937 | -10.1871 | 3.50E-16 | 7.14E-15 | 26.37982 |
| GZMA     | 1.722095 | 3.299151 | 5.415443 | 10.17943 | 3.62E-16 | 7.38E-15 | 26.34552 |
| NXN      | 0.703946 | 1.628954 | 6.422532 | 10.17624 | 3.67E-16 | 7.45E-15 | 26.33125 |
| RNF34    | 0.44556  | 1.361843 | 7.561772 | 10.17616 | 3.68E-16 | 7.45E-15 | 26.33088 |
| APOM     | -1.34974 | 0.392362 | 10.79684 | -10.1756 | 3.69E-16 | 7.45E-15 | 26.32827 |
| CSDC2    | -0.63436 | 0.644226 | 6.932405 | -10.163  | 3.90E-16 | 7.87E-15 | 26.27214 |
| SAMHD1   | 0.770968 | 1.706415 | 6.188354 | 10.15897 | 3.97E-16 | 7.99E-15 | 26.25403 |
| CMC2     | -0.43206 | 0.741205 | 9.324304 | -10.1586 | 3.98E-16 | 7.99E-15 | 26.25243 |

|          |          |          |          |          |          |          |          |
|----------|----------|----------|----------|----------|----------|----------|----------|
| MFSD10   | 0.556212 | 1.470404 | 5.817342 | 10.15422 | 4.06E-16 | 8.13E-15 | 26.23276 |
| RENBP    | -0.67361 | 0.626936 | 7.372532 | -10.1314 | 4.50E-16 | 8.99E-15 | 26.13086 |
| RXRA     | -0.42163 | 0.746582 | 6.739747 | -10.1287 | 4.55E-16 | 9.08E-15 | 26.11881 |
| CYP3A4   | -0.55161 | 0.682256 | 6.612405 | -10.1238 | 4.66E-16 | 9.27E-15 | 26.09658 |
| BHMT     | -1.18668 | 0.439313 | 12.15734 | -10.1224 | 4.69E-16 | 9.30E-15 | 26.0904  |
| KLHDC2   | -0.48621 | 0.7139   | 10.02038 | -10.1215 | 4.71E-16 | 9.32E-15 | 26.08644 |
| ALOX5    | 1.030257 | 2.042388 | 4.761013 | 10.12071 | 4.72E-16 | 9.33E-15 | 26.08286 |
| STK10    | 0.459216 | 1.374795 | 5.532911 | 10.11084 | 4.94E-16 | 9.73E-15 | 26.03868 |
| ST5      | 0.578682 | 1.493485 | 6.086076 | 10.08518 | 5.55E-16 | 1.09E-14 | 25.92386 |
| INTS8    | 0.484526 | 1.399126 | 7.566962 | 10.08218 | 5.62E-16 | 1.10E-14 | 25.91043 |
| LHFP     | 1.284341 | 2.435708 | 7.093671 | 10.07475 | 5.81E-16 | 1.14E-14 | 25.87715 |
| ISG20    | 1.249822 | 2.378121 | 5.573165 | 10.07305 | 5.86E-16 | 1.14E-14 | 25.86957 |
| CLEC2B   | 1.111726 | 2.16104  | 6.615696 | 10.07213 | 5.88E-16 | 1.15E-14 | 25.86543 |
| ALDOB    | -1.11611 | 0.461337 | 12.64443 | -10.0661 | 6.05E-16 | 1.18E-14 | 25.83822 |
| BASP1    | 1.105837 | 2.152237 | 7.123671 | 10.05007 | 6.50E-16 | 1.26E-14 | 25.76664 |
| TST      | -0.71983 | 0.60717  | 11.03975 | -10.0439 | 6.69E-16 | 1.29E-14 | 25.73892 |
| TRAPPC6A | -0.50791 | 0.70324  | 8.035443 | -10.041  | 6.77E-16 | 1.31E-14 | 25.72602 |
| GLUD1    | -0.71321 | 0.609962 | 10.08316 | -10.0264 | 7.24E-16 | 1.39E-14 | 25.66044 |
| ALDH3A2  | -0.91175 | 0.531539 | 9.813924 | -10.0148 | 7.63E-16 | 1.47E-14 | 25.6086  |
| PTTG1IP  | 0.427503 | 1.344904 | 11.01532 | 10.00424 | 8.00E-16 | 1.53E-14 | 25.56134 |
| VWA5A    | 0.48444  | 1.399043 | 7.096709 | 10.00408 | 8.01E-16 | 1.53E-14 | 25.56062 |
| EPM2A    | -0.42003 | 0.747408 | 5.992152 | -10.003  | 8.04E-16 | 1.53E-14 | 25.55595 |
| ARSF     | -0.82026 | 0.566341 | 7.876709 | -10.0016 | 8.10E-16 | 1.54E-14 | 25.54939 |
| CYFIP1   | 0.470593 | 1.385679 | 9.95962  | 10.00103 | 8.12E-16 | 1.54E-14 | 25.54699 |
| SHMT2    | -0.34887 | 0.785201 | 7.362532 | -10.0004 | 8.14E-16 | 1.54E-14 | 25.54402 |
| ZNF207   | 0.365053 | 1.287929 | 8.945316 | 9.998185 | 8.22E-16 | 1.55E-14 | 25.53422 |
| CHST15   | 0.806614 | 1.749101 | 5.589114 | 9.991818 | 8.46E-16 | 1.60E-14 | 25.50568 |
| CD2      | 1.233715 | 2.351719 | 5.757089 | 9.986985 | 8.65E-16 | 1.62E-14 | 25.48402 |
| IQGAP2   | -0.7604  | 0.590335 | 8.463671 | -9.98681 | 8.66E-16 | 1.62E-14 | 25.48326 |
| GIMAP6   | 1.048162 | 2.067894 | 5.472405 | 9.986628 | 8.66E-16 | 1.62E-14 | 25.48243 |
| FOLR1    | -0.80527 | 0.572255 | 10.39101 | -9.98159 | 8.86E-16 | 1.66E-14 | 25.45985 |
| FBN1     | 0.546706 | 1.460747 | 5.019241 | 9.978473 | 8.99E-16 | 1.68E-14 | 25.44587 |
| ALDH4A1  | -0.82845 | 0.563136 | 9.39481  | -9.97603 | 9.09E-16 | 1.69E-14 | 25.43492 |
| RPA1     | 0.466186 | 1.381452 | 7.435823 | 9.976011 | 9.09E-16 | 1.69E-14 | 25.43484 |
| C1RL     | 0.476034 | 1.390915 | 4.874937 | 9.975354 | 9.12E-16 | 1.69E-14 | 25.43189 |
| COLEC11  | -1.00328 | 0.498864 | 9.008734 | -9.97311 | 9.21E-16 | 1.70E-14 | 25.42185 |
| CAP1     | 0.405547 | 1.324591 | 10.3181  | 9.968116 | 9.42E-16 | 1.74E-14 | 25.39945 |
| TP53BP1  | 0.365679 | 1.288487 | 6.471013 | 9.960565 | 9.75E-16 | 1.80E-14 | 25.3656  |
| CD3D     | 1.46305  | 2.756906 | 5.766582 | 9.952467 | 1.01E-15 | 1.86E-14 | 25.32929 |
| CXADR    | 1.048458 | 2.068319 | 7.354051 | 9.948004 | 1.03E-15 | 1.89E-14 | 25.30928 |
| ABCC2    | -0.83543 | 0.560417 | 6.864937 | -9.94659 | 1.04E-15 | 1.90E-14 | 25.30295 |
| ARL2     | -0.3996  | 0.758066 | 9.031772 | -9.94577 | 1.04E-15 | 1.90E-14 | 25.29928 |
| CCND2    | 0.52888  | 1.442809 | 5.13962  | 9.941831 | 1.06E-15 | 1.93E-14 | 25.2816  |
| GNAI3    | 0.41496  | 1.333262 | 7.607468 | 9.940967 | 1.07E-15 | 1.94E-14 | 25.27773 |
| HCP5     | 1.029394 | 2.041167 | 6.11     | 9.922748 | 1.16E-15 | 2.10E-14 | 25.19602 |
| GMFG     | 1.234585 | 2.353136 | 6.816582 | 9.917346 | 1.19E-15 | 2.15E-14 | 25.1718  |
| LTB      | 1.280804 | 2.429743 | 6.349367 | 9.916132 | 1.19E-15 | 2.15E-14 | 25.16635 |

|          |          |          |          |          |          |          |          |
|----------|----------|----------|----------|----------|----------|----------|----------|
| A1CF     | -0.91327 | 0.530981 | 8.303291 | -9.91327 | 1.21E-15 | 2.18E-14 | 25.15352 |
| PPP6R2   | -0.3556  | 0.781545 | 6.074937 | -9.91183 | 1.22E-15 | 2.19E-14 | 25.14707 |
| EPHX2    | -0.94447 | 0.519622 | 9.867215 | -9.9041  | 1.26E-15 | 2.26E-14 | 25.11237 |
| ETNPPL   | -1.32429 | 0.399346 | 5.537468 | -9.90006 | 1.28E-15 | 2.30E-14 | 25.09427 |
| RPLP2    | 0.647016 | 1.565926 | 11.57962 | 9.888726 | 1.35E-15 | 2.41E-14 | 25.0434  |
| PGM1     | -0.43292 | 0.740762 | 9.833291 | -9.88812 | 1.35E-15 | 2.41E-14 | 25.04069 |
| PRPF38B  | 0.425343 | 1.342891 | 6.253544 | 9.88078  | 1.40E-15 | 2.49E-14 | 25.00775 |
| IRF8     | 1.413755 | 2.664297 | 7.163165 | 9.866996 | 1.49E-15 | 2.65E-14 | 24.9459  |
| TLN2     | -0.73818 | 0.599494 | 8.181646 | -9.86599 | 1.50E-15 | 2.65E-14 | 24.94137 |
| PCYT2    | -0.59813 | 0.66061  | 7.207975 | -9.86254 | 1.52E-15 | 2.69E-14 | 24.9259  |
| TDRD7    | 0.493939 | 1.408285 | 6.626329 | 9.859627 | 1.54E-15 | 2.72E-14 | 24.91283 |
| GYPC     | 0.775323 | 1.711573 | 7.804304 | 9.855254 | 1.57E-15 | 2.77E-14 | 24.8932  |
| VSIG4    | 1.487352 | 2.803738 | 6.583038 | 9.852869 | 1.59E-15 | 2.79E-14 | 24.8825  |
| FAM3A    | -0.34681 | 0.786324 | 6.957089 | -9.84517 | 1.64E-15 | 2.88E-14 | 24.84794 |
| DUSP22   | 0.484038 | 1.398653 | 7.789367 | 9.842493 | 1.66E-15 | 2.91E-14 | 24.83592 |
| TXN2     | -0.32355 | 0.799101 | 8.815063 | -9.83307 | 1.74E-15 | 3.04E-14 | 24.7936  |
| GK       | -0.8693  | 0.547414 | 8.764051 | -9.83255 | 1.74E-15 | 3.04E-14 | 24.79128 |
| KIAA0930 | 0.43583  | 1.352689 | 5.925316 | 9.828723 | 1.77E-15 | 3.08E-14 | 24.77411 |
| SLIT2    | -0.83393 | 0.560998 | 8.120127 | -9.82273 | 1.82E-15 | 3.16E-14 | 24.74721 |
| ERF      | -0.50331 | 0.705488 | 6.663671 | -9.81494 | 1.89E-15 | 3.27E-14 | 24.71223 |
| ACOX1    | -0.58589 | 0.666239 | 7.945696 | -9.7985  | 2.03E-15 | 3.51E-14 | 24.6384  |
| HNF4A    | -0.43831 | 0.737997 | 6.267342 | -9.79638 | 2.05E-15 | 3.54E-14 | 24.62889 |
| ALDH18A1 | 0.593636 | 1.509046 | 7.887975 | 9.794184 | 2.07E-15 | 3.57E-14 | 24.61902 |
| TLR7     | 0.469453 | 1.384585 | 3.932405 | 9.792645 | 2.09E-15 | 3.59E-14 | 24.61211 |
| ABCC1    | 0.417299 | 1.335425 | 5.848228 | 9.789785 | 2.11E-15 | 3.63E-14 | 24.59926 |
| ARHGEF40 | 0.436963 | 1.353752 | 6.464051 | 9.784244 | 2.17E-15 | 3.71E-14 | 24.57437 |
| SRGN     | 1.35253  | 2.553595 | 8.420633 | 9.780437 | 2.21E-15 | 3.77E-14 | 24.55727 |
| NDUFS1   | -0.54009 | 0.68773  | 8.564177 | -9.77767 | 2.23E-15 | 3.81E-14 | 24.54485 |
| TSKU     | -0.97026 | 0.510415 | 8.164051 | -9.77423 | 2.27E-15 | 3.86E-14 | 24.5294  |
| MANSC1   | 0.646581 | 1.565454 | 5.609873 | 9.773518 | 2.28E-15 | 3.86E-14 | 24.52619 |
| FCHSD2   | 0.737727 | 1.667547 | 6.363165 | 9.769896 | 2.31E-15 | 3.92E-14 | 24.50992 |
| CDH3     | 0.803874 | 1.745782 | 6.701013 | 9.769474 | 2.32E-15 | 3.92E-14 | 24.50803 |
| ZCCHC6   | 0.436028 | 1.352874 | 6.589747 | 9.767087 | 2.34E-15 | 3.96E-14 | 24.49731 |
| MRPL40   | -0.37458 | 0.771327 | 8.912658 | -9.76603 | 2.36E-15 | 3.97E-14 | 24.49254 |
| FGL2     | 1.109644 | 2.157924 | 8.345696 | 9.749488 | 2.54E-15 | 4.27E-14 | 24.41824 |
| RNF186   | -1.21945 | 0.429447 | 8.982785 | -9.73719 | 2.68E-15 | 4.50E-14 | 24.36299 |
| NCK1     | 0.519111 | 1.433072 | 6.332278 | 9.732213 | 2.75E-15 | 4.60E-14 | 24.34062 |
| ARFIP2   | -0.39903 | 0.758371 | 8.208101 | -9.72871 | 2.79E-15 | 4.66E-14 | 24.32488 |
| EIF4G3   | 0.393544 | 1.313616 | 5.595696 | 9.728141 | 2.80E-15 | 4.66E-14 | 24.32232 |
| KDM5B    | 0.407339 | 1.326237 | 6.694937 | 9.727495 | 2.81E-15 | 4.67E-14 | 24.31942 |
| TSPO     | 0.577148 | 1.491897 | 8.34     | 9.723032 | 2.86E-15 | 4.76E-14 | 24.29936 |
| TPCN1    | -0.50923 | 0.702598 | 8.399241 | -9.71855 | 2.92E-15 | 4.84E-14 | 24.27921 |
| MRPL46   | -0.38675 | 0.764849 | 7.938228 | -9.71724 | 2.94E-15 | 4.86E-14 | 24.27335 |
| CLPTM1   | -0.53977 | 0.687881 | 8.031266 | -9.71534 | 2.97E-15 | 4.90E-14 | 24.26478 |
| SMPDL3A  | -0.98624 | 0.504792 | 9.169114 | -9.71337 | 2.99E-15 | 4.93E-14 | 24.25593 |
| CDK18    | -0.51932 | 0.6977   | 6.176329 | -9.70821 | 3.06E-15 | 5.04E-14 | 24.23273 |
| SAE1     | 0.417793 | 1.335883 | 7.954304 | 9.689626 | 3.33E-15 | 5.47E-14 | 24.14921 |



|          |          |          |          |          |          |          |          |
|----------|----------|----------|----------|----------|----------|----------|----------|
| LY86     | 1.028175 | 2.039443 | 6.741013 | 9.682249 | 3.45E-15 | 5.65E-14 | 24.11604 |
| TM6SF1   | 0.636522 | 1.554577 | 4.969367 | 9.681554 | 3.46E-15 | 5.65E-14 | 24.11292 |
| MTTP     | -1.02714 | 0.490682 | 6.220506 | -9.66826 | 3.67E-15 | 5.99E-14 | 24.05313 |
| CX3CR1   | 1.615072 | 3.06327  | 6.092911 | 9.663109 | 3.76E-15 | 6.12E-14 | 24.02999 |
| ENOSF1   | -0.47646 | 0.718738 | 7.943797 | -9.65603 | 3.88E-15 | 6.31E-14 | 23.99817 |
| IFI27    | 1.711897 | 3.275913 | 8.156835 | 9.654425 | 3.91E-15 | 6.34E-14 | 23.99094 |
| SLC22A7  | -0.84186 | 0.557925 | 7.297468 | -9.65404 | 3.92E-15 | 6.34E-14 | 23.98922 |
| SEL1L3   | 0.939289 | 1.917582 | 6.986709 | 9.645912 | 4.06E-15 | 6.57E-14 | 23.95266 |
| KCTD12   | 0.781686 | 1.719139 | 8.516962 | 9.633763 | 4.30E-15 | 6.93E-14 | 23.89802 |
| PAOX     | -0.38675 | 0.764849 | 6.408228 | -9.62513 | 4.47E-15 | 7.19E-14 | 23.85917 |
| ANGPTL3  | -1.42738 | 0.371806 | 7.968101 | -9.62079 | 4.56E-15 | 7.31E-14 | 23.83968 |
| DHX15    | 0.353847 | 1.277964 | 9.449114 | 9.620729 | 4.56E-15 | 7.31E-14 | 23.83939 |
| ADAM10   | 0.610856 | 1.527165 | 7.277342 | 9.617544 | 4.62E-15 | 7.40E-14 | 23.82507 |
| CSTA     | 1.603762 | 3.039347 | 5.061013 | 9.608247 | 4.82E-15 | 7.71E-14 | 23.78325 |
| LRRC49   | 0.454163 | 1.369988 | 5.497975 | 9.605436 | 4.89E-15 | 7.79E-14 | 23.7706  |
| KYNU     | -0.47572 | 0.719109 | 7.092152 | -9.60379 | 4.92E-15 | 7.84E-14 | 23.76319 |
| GRINA    | -0.49926 | 0.707468 | 6.931013 | -9.60168 | 4.97E-15 | 7.89E-14 | 23.75372 |
| PEBP1    | -0.47616 | 0.718889 | 11.54392 | -9.60159 | 4.97E-15 | 7.89E-14 | 23.75329 |
| FUT3     | -0.71637 | 0.608627 | 6.662278 | -9.59736 | 5.07E-15 | 8.02E-14 | 23.73427 |
| ACADSB   | -0.85903 | 0.551322 | 8.137468 | -9.59649 | 5.09E-15 | 8.04E-14 | 23.73035 |
| SLC13A2  | -0.84453 | 0.556891 | 7.274177 | -9.59462 | 5.13E-15 | 8.09E-14 | 23.72196 |
| DHRS12   | -0.30517 | 0.809346 | 6.237089 | -9.58948 | 5.25E-15 | 8.27E-14 | 23.69882 |
| ARHGAP15 | 1.198643 | 2.295237 | 6.694177 | 9.588709 | 5.27E-15 | 8.28E-14 | 23.69535 |
| EVI2B    | 1.446509 | 2.725477 | 5.010759 | 9.586641 | 5.32E-15 | 8.34E-14 | 23.68605 |
| SLC2A4RG | -0.67929 | 0.624473 | 7.441899 | -9.58651 | 5.32E-15 | 8.34E-14 | 23.68546 |
| GYPA     | -0.37476 | 0.771232 | 4.503671 | -9.57774 | 5.54E-15 | 8.66E-14 | 23.64598 |
| PIGR     | 0.93137  | 1.907086 | 8.202532 | 9.567899 | 5.79E-15 | 9.04E-14 | 23.60172 |
| IFRD2    | -0.42623 | 0.744203 | 7.981519 | -9.56746 | 5.81E-15 | 9.04E-14 | 23.59975 |
| SLC26A6  | -0.58383 | 0.667188 | 5.781772 | -9.56368 | 5.91E-15 | 9.18E-14 | 23.58271 |
| UQCRC1   | -0.44219 | 0.736015 | 10.57203 | -9.56215 | 5.95E-15 | 9.23E-14 | 23.57585 |
| STRA6    | -0.56478 | 0.67606  | 6.367342 | -9.55742 | 6.08E-15 | 9.41E-14 | 23.55454 |
| PBLD     | -0.83089 | 0.562183 | 10.78835 | -9.55551 | 6.13E-15 | 9.48E-14 | 23.54597 |
| RALYL    | -1.04416 | 0.484926 | 7.32557  | -9.55009 | 6.28E-15 | 9.69E-14 | 23.52158 |
| TPST1    | 0.528518 | 1.442446 | 6.283165 | 9.548124 | 6.34E-15 | 9.76E-14 | 23.51272 |
| BTD      | -0.47109 | 0.721421 | 7.024304 | -9.53938 | 6.60E-15 | 1.01E-13 | 23.47339 |
| ENO3     | -0.51289 | 0.700816 | 5.013797 | -9.53764 | 6.65E-15 | 1.02E-13 | 23.46554 |
| CRIP1    | 0.956383 | 1.940439 | 6.784937 | 9.533489 | 6.78E-15 | 1.04E-13 | 23.44685 |
| ZDHC13   | 0.566943 | 1.481382 | 6.092911 | 9.53196  | 6.82E-15 | 1.04E-13 | 23.43997 |
| SLC6A13  | -0.83011 | 0.562488 | 8.817595 | -9.53111 | 6.85E-15 | 1.05E-13 | 23.43613 |
| CYP3A7   | -1.34526 | 0.393582 | 6.863924 | -9.52998 | 6.89E-15 | 1.05E-13 | 23.43107 |
| TTC38    | -0.71121 | 0.61081  | 9.311392 | -9.52728 | 6.97E-15 | 1.06E-13 | 23.41889 |
| HMGCL    | -0.47874 | 0.717603 | 9.769367 | -9.5244  | 7.06E-15 | 1.07E-13 | 23.40594 |
| BCL2L2   | -0.3705  | 0.773514 | 7.210886 | -9.5182  | 7.26E-15 | 1.10E-13 | 23.37804 |
| CALM1    | -0.51269 | 0.700912 | 10.11823 | -9.51651 | 7.32E-15 | 1.11E-13 | 23.37044 |
| MX2      | 0.905758 | 1.873528 | 5.928354 | 9.510742 | 7.52E-15 | 1.13E-13 | 23.34446 |
| CRAT     | -0.43172 | 0.741378 | 7.646835 | -9.51043 | 7.53E-15 | 1.13E-13 | 23.34306 |
| NMRK1    | -0.66119 | 0.632355 | 8.189241 | -9.50259 | 7.80E-15 | 1.17E-13 | 23.30777 |

|          |          |          |          |          |          |          |          |
|----------|----------|----------|----------|----------|----------|----------|----------|
| MACF1    | 0.530823 | 1.444754 | 7.871519 | 9.49779  | 7.97E-15 | 1.20E-13 | 23.28615 |
| MAP4K4   | 0.498841 | 1.413077 | 5.416203 | 9.487893 | 8.34E-15 | 1.25E-13 | 23.24159 |
| HK1      | 0.696126 | 1.620149 | 7.94557  | 9.486394 | 8.40E-15 | 1.26E-13 | 23.23484 |
| SH3BGRL3 | 0.628808 | 1.546286 | 8.278101 | 9.482363 | 8.55E-15 | 1.28E-13 | 23.21669 |
| ACAT1    | -0.62003 | 0.650659 | 11.08709 | -9.48088 | 8.61E-15 | 1.28E-13 | 23.21002 |
| USH1C    | -0.66742 | 0.629633 | 8.814684 | -9.47755 | 8.74E-15 | 1.30E-13 | 23.19504 |
| PTPRE    | 0.699585 | 1.624038 | 5.278101 | 9.471186 | 9.00E-15 | 1.34E-13 | 23.16637 |
| CSF2RB   | 1.218953 | 2.327777 | 5.171139 | 9.467608 | 9.15E-15 | 1.36E-13 | 23.15025 |
| FAAH     | -0.55217 | 0.681992 | 6.391519 | -9.46538 | 9.24E-15 | 1.37E-13 | 23.14023 |
| ANXA4    | 0.657839 | 1.577718 | 10.71392 | 9.458082 | 9.55E-15 | 1.41E-13 | 23.10736 |
| EPB41L2  | 0.602075 | 1.517898 | 6.232152 | 9.457664 | 9.57E-15 | 1.41E-13 | 23.10547 |
| DPEP1    | -1.52493 | 0.347495 | 10.11278 | -9.45248 | 9.80E-15 | 1.44E-13 | 23.08215 |
| CCL5     | 1.439256 | 2.711809 | 5.453165 | 9.449268 | 9.94E-15 | 1.46E-13 | 23.06766 |
| ILVBL    | -0.50997 | 0.702238 | 8.179367 | -9.44663 | 1.01E-14 | 1.48E-13 | 23.05579 |
| PRKCH    | 0.442925 | 1.359357 | 5.819367 | 9.444969 | 1.01E-14 | 1.49E-13 | 23.0483  |
| SAYSD1   | 0.355929 | 1.279809 | 6.019114 | 9.437442 | 1.05E-14 | 1.53E-13 | 23.0144  |
| ACADS    | -0.37496 | 0.771127 | 7.039241 | -9.42899 | 1.09E-14 | 1.59E-13 | 22.97632 |
| GRB10    | -0.49493 | 0.709597 | 7.821519 | -9.41993 | 1.14E-14 | 1.66E-13 | 22.93551 |
| MYL6     | 0.411001 | 1.329608 | 12.19038 | 9.412776 | 1.17E-14 | 1.71E-13 | 22.9033  |
| SMC4     | 0.500889 | 1.415086 | 5.633797 | 9.408398 | 1.20E-14 | 1.74E-13 | 22.88358 |
| C1orf115 | -0.58544 | 0.666445 | 9.012405 | -9.40403 | 1.22E-14 | 1.77E-13 | 22.86389 |
| FHL1     | 1.070837 | 2.100651 | 6.524051 | 9.397163 | 1.26E-14 | 1.82E-13 | 22.83297 |
| CSNK1A1  | 0.304427 | 1.234928 | 9.034557 | 9.388434 | 1.31E-14 | 1.90E-13 | 22.79364 |
| SLC19A2  | -0.92861 | 0.525364 | 6.821013 | -9.38522 | 1.33E-14 | 1.92E-13 | 22.77916 |
| NSMAF    | 0.452233 | 1.368156 | 5.943038 | 9.383656 | 1.34E-14 | 1.93E-13 | 22.77212 |
| NAGLU    | -0.54832 | 0.683816 | 7.432911 | -9.38213 | 1.35E-14 | 1.94E-13 | 22.76523 |
| IRF9     | 0.83386  | 1.782448 | 9.016582 | 9.38121  | 1.36E-14 | 1.95E-13 | 22.76109 |
| FPR3     | 0.999552 | 1.999379 | 5.161013 | 9.377365 | 1.38E-14 | 1.98E-13 | 22.74377 |
| SLC25A28 | -0.28939 | 0.818246 | 6.919114 | -9.37567 | 1.39E-14 | 1.99E-13 | 22.73615 |
| GSS      | -0.376   | 0.77057  | 8.759241 | -9.37547 | 1.39E-14 | 1.99E-13 | 22.73524 |
| SLC22A11 | -0.82415 | 0.564815 | 8.53443  | -9.3716  | 1.42E-14 | 2.02E-13 | 22.7178  |
| TNFRSF1B | 0.596733 | 1.512288 | 5.164051 | 9.367945 | 1.44E-14 | 2.05E-13 | 22.70133 |
| DPP4     | -0.96677 | 0.51165  | 9.110506 | -9.36305 | 1.47E-14 | 2.09E-13 | 22.67928 |
| PMM1     | -0.45066 | 0.731709 | 7.983924 | -9.35753 | 1.51E-14 | 2.14E-13 | 22.65439 |
| MS4A4A   | 1.56973  | 2.968491 | 5.488101 | 9.354155 | 1.53E-14 | 2.17E-13 | 22.63919 |
| HSPA9    | -0.42574 | 0.744458 | 8.567595 | -9.35156 | 1.55E-14 | 2.19E-13 | 22.6275  |
| CD163    | 1.284486 | 2.435953 | 5.530253 | 9.346301 | 1.59E-14 | 2.24E-13 | 22.6038  |
| AP1S2    | 0.751765 | 1.683852 | 6.716203 | 9.342795 | 1.61E-14 | 2.27E-13 | 22.588   |
| CLCN6    | -0.40665 | 0.754371 | 6.677089 | -9.33414 | 1.68E-14 | 2.36E-13 | 22.54899 |
| LST1     | 1.064631 | 2.091635 | 6.624937 | 9.331374 | 1.70E-14 | 2.39E-13 | 22.53653 |
| BCKDHA   | -0.34181 | 0.78905  | 8.745696 | -9.32758 | 1.73E-14 | 2.43E-13 | 22.51944 |
| BZW2     | 0.417332 | 1.335456 | 8.550633 | 9.327006 | 1.73E-14 | 2.43E-13 | 22.51685 |
| RNF219   | 0.481094 | 1.395801 | 5.488354 | 9.32269  | 1.77E-14 | 2.47E-13 | 22.4974  |
| KIAA0355 | 0.402951 | 1.32221  | 7.016582 | 9.317687 | 1.81E-14 | 2.53E-13 | 22.47485 |
| CARD8    | 0.574816 | 1.489487 | 6.257722 | 9.315516 | 1.83E-14 | 2.54E-13 | 22.46507 |
| PPT1     | 0.443347 | 1.359755 | 9.892152 | 9.315516 | 1.83E-14 | 2.54E-13 | 22.46506 |
| PAAF1    | -0.53482 | 0.690247 | 8.078987 | -9.30891 | 1.88E-14 | 2.62E-13 | 22.43527 |

|          |          |          |          |          |          |          |          |
|----------|----------|----------|----------|----------|----------|----------|----------|
| ATP6V1B2 | -0.55208 | 0.682038 | 10.31873 | -9.29296 | 2.03E-14 | 2.81E-13 | 22.36342 |
| SMARCE1  | 0.474578 | 1.389512 | 8.580633 | 9.282937 | 2.12E-14 | 2.93E-13 | 22.31822 |
| SLC27A3  | 0.572688 | 1.487292 | 5.838354 | 9.279307 | 2.16E-14 | 2.98E-13 | 22.30186 |
| CCL19    | 2.225191 | 4.675728 | 5.82038  | 9.277805 | 2.17E-14 | 2.99E-13 | 22.29509 |
| DECR2    | -0.78038 | 0.582215 | 8.830759 | -9.2676  | 2.27E-14 | 3.13E-13 | 22.24908 |
| TSFM     | -0.36995 | 0.773811 | 6.153291 | -9.25891 | 2.37E-14 | 3.25E-13 | 22.20991 |
| SUOX     | -0.50248 | 0.705894 | 8.582278 | -9.25877 | 2.37E-14 | 3.25E-13 | 22.20927 |
| GPD1L    | -0.45811 | 0.72794  | 8.771899 | -9.25259 | 2.44E-14 | 3.34E-13 | 22.18144 |
| KCNAB2   | -0.34574 | 0.786905 | 6.121013 | -9.24856 | 2.48E-14 | 3.39E-13 | 22.16327 |
| MFAP1    | 0.397523 | 1.317244 | 8.338228 | 9.246972 | 2.50E-14 | 3.41E-13 | 22.15609 |
| LRP5     | -0.42999 | 0.742265 | 5.348861 | -9.24455 | 2.53E-14 | 3.44E-13 | 22.14515 |
| CD320    | -0.34363 | 0.788056 | 7.574937 | -9.24444 | 2.53E-14 | 3.44E-13 | 22.14469 |
| PDZD2    | -0.93439 | 0.523265 | 6.313165 | -9.24062 | 2.57E-14 | 3.50E-13 | 22.12746 |
| GALNT7   | 0.938123 | 1.916033 | 6.97557  | 9.236987 | 2.61E-14 | 3.55E-13 | 22.11107 |
| APOC3    | -1.76806 | 0.293604 | 6.482532 | -9.22679 | 2.74E-14 | 3.71E-13 | 22.06511 |
| IFI44    | 1.48054  | 2.790532 | 5.823671 | 9.224011 | 2.77E-14 | 3.75E-13 | 22.05257 |
| PNPO     | -0.40644 | 0.754485 | 8.206962 | -9.21695 | 2.86E-14 | 3.87E-13 | 22.02073 |
| APITD1   | -0.71111 | 0.610851 | 8.328608 | -9.21668 | 2.87E-14 | 3.87E-13 | 22.01952 |
| TRIM15   | -0.36417 | 0.776916 | 6.071139 | -9.21621 | 2.87E-14 | 3.87E-13 | 22.01742 |
| LCP1     | 0.967306 | 1.955186 | 7.426456 | 9.214927 | 2.89E-14 | 3.89E-13 | 22.01161 |
| ASL      | -0.62599 | 0.647973 | 9.123291 | -9.2137  | 2.91E-14 | 3.90E-13 | 22.00609 |
| CXCR4    | 1.329928 | 2.5139   | 6.382278 | 9.213359 | 2.91E-14 | 3.90E-13 | 22.00454 |
| TMEM87A  | 0.422563 | 1.340306 | 7.784557 | 9.209472 | 2.96E-14 | 3.96E-13 | 21.98702 |
| ARL6IP5  | 0.70448  | 1.629557 | 9.699494 | 9.207485 | 2.99E-14 | 3.99E-13 | 21.97806 |
| AGMAT    | -1.0891  | 0.470055 | 11.14658 | -9.20508 | 3.02E-14 | 4.03E-13 | 21.96723 |
| SLC7A7   | -1.03462 | 0.488145 | 11.65456 | -9.20012 | 3.09E-14 | 4.12E-13 | 21.94485 |
| MTHFD2   | 0.964335 | 1.951163 | 5.921519 | 9.198417 | 3.12E-14 | 4.14E-13 | 21.93717 |
| DNAJC16  | -0.51448 | 0.700045 | 7.589873 | -9.19692 | 3.14E-14 | 4.17E-13 | 21.93041 |
| PAK2     | 0.384242 | 1.305174 | 6.960506 | 9.195589 | 3.16E-14 | 4.18E-13 | 21.92442 |
| PROSC    | -0.39317 | 0.761455 | 8.937722 | -9.19422 | 3.18E-14 | 4.20E-13 | 21.91823 |
| TUSC3    | 0.719321 | 1.646408 | 6.567215 | 9.189812 | 3.24E-14 | 4.28E-13 | 21.89837 |
| YEATS2   | 0.448663 | 1.364775 | 5.266329 | 9.162814 | 3.67E-14 | 4.84E-13 | 21.77662 |
| MTFR1    | -0.49733 | 0.708419 | 8.39443  | -9.16193 | 3.68E-14 | 4.84E-13 | 21.77262 |
| IFI30    | 0.769005 | 1.704094 | 9.631013 | 9.161862 | 3.68E-14 | 4.84E-13 | 21.77233 |
| DHTKD1   | -0.66225 | 0.631894 | 8.542278 | -9.15839 | 3.74E-14 | 4.91E-13 | 21.75668 |
| CDHR2    | -0.55207 | 0.682042 | 7.687215 | -9.15569 | 3.79E-14 | 4.96E-13 | 21.74449 |
| XPO1     | 0.432213 | 1.349302 | 8.689241 | 9.155462 | 3.79E-14 | 4.96E-13 | 21.74346 |
| ATP9A    | 0.70695  | 1.632349 | 6.819873 | 9.146485 | 3.95E-14 | 5.16E-13 | 21.70298 |
| DCP2     | 0.49191  | 1.406306 | 6.284177 | 9.143666 | 4.00E-14 | 5.22E-13 | 21.69027 |
| FCGR2B   | 1.203076 | 2.302301 | 5.221899 | 9.142606 | 4.02E-14 | 5.23E-13 | 21.68549 |
| DHRS1    | -0.56713 | 0.674956 | 8.811139 | -9.14248 | 4.02E-14 | 5.23E-13 | 21.68492 |
| ZGPAT    | -1.27847 | 0.412232 | 8.292911 | -9.13923 | 4.08E-14 | 5.30E-13 | 21.67026 |
| HCK      | 1.042372 | 2.059611 | 4.977595 | 9.129434 | 4.27E-14 | 5.54E-13 | 21.62608 |
| LPXN     | 0.678287 | 1.600239 | 6.748987 | 9.124811 | 4.36E-14 | 5.64E-13 | 21.60523 |
| DYRK2    | 0.535856 | 1.449803 | 5.191013 | 9.119828 | 4.46E-14 | 5.77E-13 | 21.58275 |
| OGG1     | -0.45964 | 0.727166 | 6.905823 | -9.11632 | 4.53E-14 | 5.85E-13 | 21.56695 |
| NIT2     | -0.53322 | 0.69101  | 10.66139 | -9.11498 | 4.56E-14 | 5.88E-13 | 21.56091 |

|           |          |          |          |          |          |          |          |
|-----------|----------|----------|----------|----------|----------|----------|----------|
| GPX7      | 0.688228 | 1.611303 | 5.956835 | 9.112481 | 4.61E-14 | 5.93E-13 | 21.54962 |
| SPRY1     | 0.509578 | 1.423634 | 7.030253 | 9.10992  | 4.67E-14 | 6.00E-13 | 21.53807 |
| IGKC      | 2.990586 | 7.947969 | 10.9338  | 9.109574 | 4.67E-14 | 6.00E-13 | 21.53651 |
| ICAM2     | 0.738248 | 1.668148 | 6.573165 | 9.107045 | 4.73E-14 | 6.06E-13 | 21.5251  |
| PTMS      | -0.62406 | 0.64884  | 6.238228 | -9.10388 | 4.80E-14 | 6.13E-13 | 21.51082 |
| PMPCB     | -0.28619 | 0.820067 | 9.099367 | -9.10059 | 4.87E-14 | 6.22E-13 | 21.49601 |
| YTHDC1    | 0.374638 | 1.296514 | 7.79519  | 9.099388 | 4.90E-14 | 6.24E-13 | 21.49056 |
| PLD1      | -0.53634 | 0.689519 | 6.349873 | -9.08727 | 5.17E-14 | 6.59E-13 | 21.43592 |
| FHIT      | -0.56406 | 0.676397 | 7.601772 | -9.08668 | 5.19E-14 | 6.60E-13 | 21.43322 |
| ADIPOR1   | -0.42623 | 0.744203 | 8.251519 | -9.0801  | 5.35E-14 | 6.79E-13 | 21.40359 |
| STAU1     | -0.61202 | 0.654282 | 10.63    | -9.07451 | 5.48E-14 | 6.95E-13 | 21.37835 |
| CRLF3     | 0.807563 | 1.750252 | 6.90038  | 9.073103 | 5.52E-14 | 6.99E-13 | 21.37201 |
| PTEN      | 0.445158 | 1.361463 | 6.98443  | 9.06935  | 5.61E-14 | 7.10E-13 | 21.35508 |
| LANCL2    | -0.44482 | 0.734675 | 7.298101 | -9.06659 | 5.69E-14 | 7.17E-13 | 21.34262 |
| EIF2D     | -0.27919 | 0.824054 | 8.926203 | -9.06365 | 5.76E-14 | 7.26E-13 | 21.32935 |
| USP2      | -1.15202 | 0.449996 | 6.91443  | -9.06181 | 5.81E-14 | 7.30E-13 | 21.32107 |
| EMX1      | -0.37252 | 0.77243  | 6.227215 | -9.06177 | 5.81E-14 | 7.30E-13 | 21.32087 |
| OSMR      | 0.860955 | 1.81624  | 5.268987 | 9.061504 | 5.82E-14 | 7.30E-13 | 21.31968 |
| TMEM50B   | 0.396891 | 1.316667 | 8.684051 | 9.053115 | 6.05E-14 | 7.57E-13 | 21.28184 |
| TUBAL3    | -0.7636  | 0.589023 | 7.093418 | -9.0481  | 6.19E-14 | 7.74E-13 | 21.25921 |
| NAGK      | 0.428748 | 1.346065 | 8.768228 | 9.042515 | 6.35E-14 | 7.92E-13 | 21.23403 |
| TMEM43    | 0.405    | 1.324089 | 8.284177 | 9.042274 | 6.35E-14 | 7.92E-13 | 21.23294 |
| MNDA      | 1.475    | 2.779836 | 4.821139 | 9.040772 | 6.40E-14 | 7.96E-13 | 21.22617 |
| FHL2      | 1.167773 | 2.246647 | 7.452152 | 9.039387 | 6.44E-14 | 8.00E-13 | 21.21992 |
| LAIR1     | 0.6033   | 1.519188 | 6.02962  | 9.037044 | 6.51E-14 | 8.08E-13 | 21.20935 |
| RARS      | 0.467727 | 1.382929 | 8.85038  | 9.034957 | 6.57E-14 | 8.14E-13 | 21.19993 |
| PINK1     | -0.32883 | 0.79618  | 9.053291 | -9.02685 | 6.82E-14 | 8.43E-13 | 21.16338 |
| TCIRG1    | 0.662688 | 1.583029 | 5.545949 | 9.026723 | 6.82E-14 | 8.43E-13 | 21.16279 |
| PDZD3     | -0.5515  | 0.682309 | 7.116582 | -9.02602 | 6.84E-14 | 8.44E-13 | 21.1596  |
| ACAD8     | -0.70618 | 0.612941 | 7.692405 | -9.02557 | 6.86E-14 | 8.45E-13 | 21.15759 |
| ST3GAL6   | -0.35831 | 0.780076 | 5.140759 | -9.02398 | 6.91E-14 | 8.50E-13 | 21.15042 |
| COQ6      | -0.39986 | 0.757931 | 7.161013 | -9.02091 | 7.00E-14 | 8.61E-13 | 21.13655 |
| PRKACB    | 0.501206 | 1.415396 | 7.610886 | 9.016421 | 7.15E-14 | 8.77E-13 | 21.11632 |
| EPB41L3   | -0.76874 | 0.586932 | 7.836709 | -9.01506 | 7.19E-14 | 8.81E-13 | 21.1102  |
| HIF1A     | 0.653221 | 1.572676 | 10.61873 | 9.014728 | 7.20E-14 | 8.81E-13 | 21.10868 |
| MEF2C     | 0.501311 | 1.415499 | 5.776582 | 9.013922 | 7.23E-14 | 8.83E-13 | 21.10505 |
| CFD       | 0.875362 | 1.834469 | 5.766962 | 9.008983 | 7.39E-14 | 9.02E-13 | 21.08276 |
| UBD       | 1.580586 | 2.990914 | 7.61481  | 9.005372 | 7.52E-14 | 9.15E-13 | 21.06648 |
| ITGB3     | 0.559453 | 1.473711 | 5.52     | 9.005275 | 7.52E-14 | 9.15E-13 | 21.06604 |
| SOWAHC    | -0.70931 | 0.611611 | 7.245443 | -9.00362 | 7.58E-14 | 9.20E-13 | 21.05859 |
| GUCY1A3   | 0.752852 | 1.685121 | 7.33557  | 8.995615 | 7.86E-14 | 9.53E-13 | 21.02246 |
| EYA2      | -0.59127 | 0.663758 | 5.656709 | -8.99447 | 7.90E-14 | 9.57E-13 | 21.01729 |
| HIST1H2Bf | 1.018729 | 2.026133 | 7.199241 | 8.991746 | 8.00E-14 | 9.68E-13 | 21.005   |
| SLC4A4    | -0.81792 | 0.567257 | 9.278987 | -8.98963 | 8.08E-14 | 9.75E-13 | 20.99545 |
| SLC5A12   | -0.98674 | 0.504617 | 7.484557 | -8.98787 | 8.14E-14 | 9.82E-13 | 20.98751 |
| NDUFA2    | -0.27374 | 0.827171 | 9.68     | -8.98669 | 8.19E-14 | 9.86E-13 | 20.9822  |
| THTPA     | -0.36478 | 0.776589 | 7.700886 | -8.98528 | 8.24E-14 | 9.91E-13 | 20.97586 |

|          |          |          |          |          |          |          |          |
|----------|----------|----------|----------|----------|----------|----------|----------|
| DNAJC10  | 0.477984 | 1.392796 | 5.965316 | 8.982083 | 8.36E-14 | 1.00E-12 | 20.96141 |
| GNPTAB   | 0.56303  | 1.477369 | 6.62519  | 8.981876 | 8.37E-14 | 1.00E-12 | 20.96048 |
| SETD3    | -0.32526 | 0.798156 | 9.218481 | -8.97809 | 8.51E-14 | 1.02E-12 | 20.9434  |
| EGF      | -1.78625 | 0.289924 | 7.907975 | -8.97764 | 8.53E-14 | 1.02E-12 | 20.94136 |
| LIME1    | -0.78254 | 0.581341 | 7.710506 | -8.97676 | 8.57E-14 | 1.02E-12 | 20.9374  |
| UTP6     | 0.445474 | 1.361762 | 7.641519 | 8.972393 | 8.74E-14 | 1.04E-12 | 20.9177  |
| RNASE1   | 1.132378 | 2.192198 | 9.513671 | 8.968087 | 8.91E-14 | 1.06E-12 | 20.89827 |
| KLF9     | -0.89584 | 0.537435 | 6.884051 | -8.96507 | 9.03E-14 | 1.07E-12 | 20.88465 |
| SLC25A20 | -0.48835 | 0.712838 | 7.89557  | -8.96404 | 9.08E-14 | 1.08E-12 | 20.88003 |
| CSPP1    | -0.44084 | 0.736704 | 6.420633 | -8.96386 | 9.08E-14 | 1.08E-12 | 20.87921 |
| POLR2G   | 0.390362 | 1.310723 | 9.429367 | 8.963019 | 9.12E-14 | 1.08E-12 | 20.87541 |
| MAP7     | -0.51163 | 0.701428 | 7.953671 | -8.9629  | 9.12E-14 | 1.08E-12 | 20.87488 |
| SNX4     | -0.45282 | 0.730614 | 8.512152 | -8.96262 | 9.14E-14 | 1.08E-12 | 20.87363 |
| FBXO21   | -0.79121 | 0.577861 | 9.627975 | -8.96222 | 9.15E-14 | 1.08E-12 | 20.8718  |
| PIK3IP1  | 0.455046 | 1.370827 | 7.49443  | 8.956339 | 9.40E-14 | 1.11E-12 | 20.84527 |
| CYC1     | -0.43973 | 0.737273 | 9.893924 | -8.95325 | 9.54E-14 | 1.12E-12 | 20.83136 |
| TUBA1B   | 0.701989 | 1.626747 | 11.20367 | 8.952965 | 9.55E-14 | 1.12E-12 | 20.83005 |
| CELF2    | 0.510962 | 1.425    | 5.111266 | 8.951622 | 9.61E-14 | 1.13E-12 | 20.824   |
| YWHAB    | 0.30143  | 1.232365 | 10.0157  | 8.939402 | 1.02E-13 | 1.19E-12 | 20.76886 |
| ZNF22    | 0.355316 | 1.279266 | 7.69038  | 8.936465 | 1.03E-13 | 1.20E-12 | 20.75562 |
| HIBCH    | -0.81088 | 0.570036 | 9.763671 | -8.93445 | 1.04E-13 | 1.21E-12 | 20.74654 |
| KIAA0101 | 0.606785 | 1.522862 | 5.196076 | 8.933089 | 1.05E-13 | 1.22E-12 | 20.74038 |
| MYO7A    | -0.31891 | 0.801677 | 5.464177 | -8.93289 | 1.05E-13 | 1.22E-12 | 20.7395  |
| MMD      | 0.798933 | 1.739814 | 7.440253 | 8.932697 | 1.05E-13 | 1.22E-12 | 20.73862 |
| SLC9A3R1 | -0.5204  | 0.697181 | 9.843924 | -8.91358 | 1.14E-13 | 1.33E-12 | 20.65239 |
| ALDH1A3  | 0.738281 | 1.668187 | 6.07557  | 8.908578 | 1.17E-13 | 1.36E-12 | 20.6298  |
| CXCL6    | 2.588775 | 6.015875 | 5.10443  | 8.907646 | 1.17E-13 | 1.36E-12 | 20.6256  |
| MCM2     | 0.429065 | 1.34636  | 6.325316 | 8.905566 | 1.19E-13 | 1.37E-12 | 20.61622 |
| HSBP1    | 0.33359  | 1.260145 | 9.57     | 8.905182 | 1.19E-13 | 1.37E-12 | 20.61448 |
| LRRFIP1  | 0.505072 | 1.419195 | 7.759241 | 8.901006 | 1.21E-13 | 1.39E-12 | 20.59564 |
| SERPINF2 | -1.05325 | 0.481882 | 7.130253 | -8.90098 | 1.21E-13 | 1.39E-12 | 20.59554 |
| SLC34A1  | -1.37003 | 0.386882 | 8.735316 | -8.90037 | 1.21E-13 | 1.40E-12 | 20.59277 |
| DENND5B  | -0.30669 | 0.808493 | 4.307975 | -8.89392 | 1.25E-13 | 1.44E-12 | 20.5637  |
| HGD      | -0.62042 | 0.650484 | 9.406709 | -8.88758 | 1.29E-13 | 1.48E-12 | 20.53507 |
| PRLR     | -0.5165  | 0.699065 | 5.326203 | -8.88473 | 1.30E-13 | 1.49E-12 | 20.52221 |
| PHB      | -0.42489 | 0.744893 | 9.673165 | -8.88247 | 1.32E-13 | 1.51E-12 | 20.51203 |
| MCCC2    | -0.49213 | 0.710972 | 8.777468 | -8.87847 | 1.34E-13 | 1.53E-12 | 20.49397 |
| GMPR2    | -0.34053 | 0.789753 | 8.809494 | -8.87532 | 1.36E-13 | 1.55E-12 | 20.47978 |
| BTN3A2   | 1.029532 | 2.041362 | 5.838101 | 8.875121 | 1.36E-13 | 1.55E-12 | 20.47887 |
| VASH1    | 0.40919  | 1.32794  | 4.768101 | 8.874707 | 1.36E-13 | 1.55E-12 | 20.477   |
| SLPI     | 1.665086 | 3.171325 | 8.060759 | 8.873359 | 1.37E-13 | 1.56E-12 | 20.47092 |
| ASB8     | -0.31143 | 0.805843 | 6.840127 | -8.87232 | 1.38E-13 | 1.57E-12 | 20.46626 |
| MPC1     | -0.57038 | 0.673438 | 10.53    | -8.8678  | 1.41E-13 | 1.60E-12 | 20.44586 |
| FZD5     | -0.49449 | 0.709814 | 6.889747 | -8.86136 | 1.45E-13 | 1.64E-12 | 20.41681 |
| RFTN1    | 0.950007 | 1.931881 | 7.535316 | 8.854364 | 1.50E-13 | 1.69E-12 | 20.38523 |
| SLC12A3  | -1.01163 | 0.495987 | 7.683291 | -8.85123 | 1.52E-13 | 1.71E-12 | 20.37111 |
| SLA      | 0.789967 | 1.729035 | 6.047595 | 8.850394 | 1.52E-13 | 1.72E-12 | 20.36732 |

|          |          |          |          |          |          |          |          |
|----------|----------|----------|----------|----------|----------|----------|----------|
| VCAM1    | 1.222345 | 2.333257 | 10.56886 | 8.842    | 1.58E-13 | 1.78E-12 | 20.32945 |
| F11      | -0.6451  | 0.639449 | 6.768354 | -8.83926 | 1.60E-13 | 1.80E-12 | 20.3171  |
| AVPI1    | -0.57696 | 0.670373 | 7.057468 | -8.83673 | 1.62E-13 | 1.82E-12 | 20.3057  |
| DDX50    | 0.547477 | 1.461527 | 8.031519 | 8.83439  | 1.64E-13 | 1.84E-12 | 20.29512 |
| C1GALT1  | -0.41654 | 0.749219 | 6.587089 | -8.83076 | 1.67E-13 | 1.87E-12 | 20.27873 |
| APOL1    | 0.470916 | 1.385989 | 6.51519  | 8.830228 | 1.67E-13 | 1.87E-12 | 20.27634 |
| SPHK2    | -0.44291 | 0.735652 | 7.056076 | -8.82524 | 1.71E-13 | 1.91E-12 | 20.25384 |
| HSDL2    | -0.52223 | 0.696296 | 7.726203 | -8.81957 | 1.75E-13 | 1.96E-12 | 20.22827 |
| BNIP3L   | -0.3972  | 0.75933  | 9.357342 | -8.81562 | 1.79E-13 | 1.99E-12 | 20.21046 |
| CYP27A1  | -0.53174 | 0.69172  | 9.07962  | -8.81476 | 1.79E-13 | 2.00E-12 | 20.20657 |
| GGH      | -0.94592 | 0.519098 | 10.12291 | -8.81383 | 1.80E-13 | 2.00E-12 | 20.20238 |
| RGS19    | 0.546667 | 1.460707 | 6.328354 | 8.808623 | 1.84E-13 | 2.05E-12 | 20.17888 |
| P3H1     | 0.345277 | 1.270395 | 6.515316 | 8.808174 | 1.85E-13 | 2.05E-12 | 20.17686 |
| SLC25A36 | -0.4585  | 0.727744 | 8.371519 | -8.80657 | 1.86E-13 | 2.06E-12 | 20.1696  |
| DCTPP1   | 0.313123 | 1.242394 | 8.579494 | 8.802541 | 1.90E-13 | 2.10E-12 | 20.15144 |
| CD99     | 0.596785 | 1.512343 | 8.561899 | 8.800409 | 1.92E-13 | 2.11E-12 | 20.14183 |
| NDRG1    | -0.51283 | 0.700845 | 11.12013 | -8.79565 | 1.96E-13 | 2.16E-12 | 20.12036 |
| PRKCZ    | -0.63367 | 0.644535 | 8.262911 | -8.79184 | 1.99E-13 | 2.19E-12 | 20.10318 |
| MLX      | -0.3085  | 0.807482 | 8.454177 | -8.79077 | 2.00E-13 | 2.20E-12 | 20.09833 |
| SOD1     | -0.2879  | 0.819094 | 12.1143  | -8.79007 | 2.01E-13 | 2.20E-12 | 20.09518 |
| SELP     | 0.608314 | 1.524476 | 6.523671 | 8.787233 | 2.03E-13 | 2.23E-12 | 20.08239 |
| CBFB     | 0.45836  | 1.373979 | 7.18038  | 8.77772  | 2.12E-13 | 2.33E-12 | 20.03948 |
| PDZK1IP1 | -0.71069 | 0.61103  | 12.61139 | -8.77386 | 2.16E-13 | 2.36E-12 | 20.02208 |
| RBP1     | 0.831113 | 1.779058 | 6.12     | 8.772977 | 2.17E-13 | 2.37E-12 | 20.01809 |
| FOXO4    | -0.39329 | 0.761393 | 5.695063 | -8.77053 | 2.19E-13 | 2.39E-12 | 20.00706 |
| RORA     | -0.58922 | 0.664701 | 6.284304 | -8.76841 | 2.22E-13 | 2.41E-12 | 19.99749 |
| CCR2     | 0.955217 | 1.938872 | 4.683797 | 8.768399 | 2.22E-13 | 2.41E-12 | 19.99743 |
| REV3L    | 0.503491 | 1.41764  | 5.863797 | 8.758677 | 2.32E-13 | 2.52E-12 | 19.95358 |
| IFT46    | -0.36539 | 0.77626  | 7.632152 | -8.75671 | 2.34E-13 | 2.54E-12 | 19.94469 |
| SLC25A16 | -0.43525 | 0.739565 | 5.471013 | -8.7561  | 2.34E-13 | 2.54E-12 | 19.94197 |
| CLEC4A   | 0.663294 | 1.583694 | 4.376203 | 8.755422 | 2.35E-13 | 2.55E-12 | 19.9389  |
| RAB11A   | 0.345231 | 1.270354 | 8.755949 | 8.754015 | 2.37E-13 | 2.56E-12 | 19.93255 |
| TESC     | 1.053452 | 2.07549  | 6.252658 | 8.751384 | 2.40E-13 | 2.59E-12 | 19.92069 |
| TLR3     | 0.625744 | 1.543007 | 6.30443  | 8.74958  | 2.41E-13 | 2.60E-12 | 19.91255 |
| REEP4    | 0.36691  | 1.289588 | 6.766962 | 8.746797 | 2.45E-13 | 2.63E-12 | 19.89999 |
| PEX7     | -0.44667 | 0.733736 | 7.173418 | -8.74469 | 2.47E-13 | 2.66E-12 | 19.89048 |
| RORC     | -0.75657 | 0.591903 | 7.071139 | -8.74354 | 2.48E-13 | 2.67E-12 | 19.88531 |
| RAE1     | 0.360909 | 1.284235 | 7.520759 | 8.740536 | 2.52E-13 | 2.70E-12 | 19.87176 |
| ALDH3B1  | -0.40875 | 0.753277 | 6.620127 | -8.73868 | 2.54E-13 | 2.72E-12 | 19.86339 |
| ANXA11   | 0.412997 | 1.331449 | 7.050127 | 8.734839 | 2.58E-13 | 2.76E-12 | 19.84606 |
| DOCK2    | 0.974223 | 1.964582 | 4.771519 | 8.73338  | 2.60E-13 | 2.78E-12 | 19.83948 |
| CALML4   | -0.66146 | 0.63224  | 8.51     | -8.73081 | 2.63E-13 | 2.81E-12 | 19.82788 |
| HHEX     | 0.548419 | 1.462482 | 4.214304 | 8.730025 | 2.64E-13 | 2.81E-12 | 19.82435 |
| ZNF816   | 0.559341 | 1.473596 | 6.855823 | 8.729848 | 2.64E-13 | 2.81E-12 | 19.82355 |
| MGAM     | -1.22207 | 0.428668 | 8.527342 | -8.72972 | 2.64E-13 | 2.81E-12 | 19.82298 |
| DDR1     | 0.491528 | 1.405933 | 8.992278 | 8.728496 | 2.66E-13 | 2.82E-12 | 19.81745 |
| AXL      | 0.37946  | 1.300855 | 6.503291 | 8.727206 | 2.67E-13 | 2.84E-12 | 19.81163 |

|          |          |          |          |          |          |          |          |
|----------|----------|----------|----------|----------|----------|----------|----------|
| C3orf18  | -0.37231 | 0.772543 | 6.828608 | -8.72371 | 2.72E-13 | 2.88E-12 | 19.79588 |
| HSPA12A  | -0.49204 | 0.711018 | 7.726203 | -8.72288 | 2.73E-13 | 2.89E-12 | 19.79212 |
| PTH1R    | -0.8111  | 0.569947 | 10.20532 | -8.72236 | 2.73E-13 | 2.89E-12 | 19.78976 |
| AGXT     | -1.46547 | 0.362116 | 7.082405 | -8.7213  | 2.75E-13 | 2.90E-12 | 19.78497 |
| GATM     | -0.79567 | 0.576075 | 12.12785 | -8.72021 | 2.76E-13 | 2.91E-12 | 19.7801  |
| MYL5     | -0.45469 | 0.729667 | 6.213544 | -8.71267 | 2.86E-13 | 3.01E-12 | 19.74609 |
| HNRNPM   | 0.439578 | 1.356208 | 9.071013 | 8.710118 | 2.89E-13 | 3.04E-12 | 19.73456 |
| TCF4     | 0.64886  | 1.567929 | 5.574304 | 8.70977  | 2.90E-13 | 3.04E-12 | 19.73299 |
| STK26    | 0.441831 | 1.358327 | 4.281519 | 8.706819 | 2.94E-13 | 3.08E-12 | 19.71968 |
| IFNGR2   | 0.422767 | 1.340496 | 8.377468 | 8.702671 | 2.99E-13 | 3.13E-12 | 19.70097 |
| SLC39A4  | -0.67278 | 0.627297 | 8.321139 | -8.70104 | 3.01E-13 | 3.15E-12 | 19.69361 |
| SLC7A9   | -1.13547 | 0.455187 | 10.67873 | -8.68452 | 3.25E-13 | 3.40E-12 | 19.61912 |
| DERA     | -0.42957 | 0.742482 | 9.741646 | -8.68252 | 3.28E-13 | 3.42E-12 | 19.6101  |
| CYP4F12  | -0.54983 | 0.683101 | 6.550759 | -8.67316 | 3.42E-13 | 3.57E-12 | 19.5679  |
| PEX19    | -0.29918 | 0.812712 | 7.806329 | -8.6715  | 3.45E-13 | 3.59E-12 | 19.5604  |
| CCDC106  | -0.33026 | 0.795391 | 5.382911 | -8.66768 | 3.51E-13 | 3.65E-12 | 19.54318 |
| THEMIS2  | 0.769124 | 1.704234 | 5.133671 | 8.666869 | 3.52E-13 | 3.66E-12 | 19.53951 |
| PSTPIP2  | 0.51166  | 1.42569  | 4.750253 | 8.664679 | 3.56E-13 | 3.69E-12 | 19.52964 |
| GPR65    | 0.866647 | 1.82342  | 4.406582 | 8.662622 | 3.59E-13 | 3.72E-12 | 19.52036 |
| LAMTOR5  | -0.45871 | 0.727637 | 11.37013 | -8.65765 | 3.67E-13 | 3.80E-12 | 19.49796 |
| TUBG2    | -0.42416 | 0.745274 | 5.353038 | -8.65192 | 3.77E-13 | 3.90E-12 | 19.47208 |
| SLC25A46 | -0.41091 | 0.752149 | 8.388354 | -8.64838 | 3.83E-13 | 3.96E-12 | 19.45612 |
| COQ4     | -0.4053  | 0.755078 | 7.965696 | -8.64667 | 3.86E-13 | 3.98E-12 | 19.44841 |
| NOTCH2   | 0.315797 | 1.244699 | 6.832785 | 8.646636 | 3.86E-13 | 3.98E-12 | 19.44828 |
| BBS1     | -0.36404 | 0.776987 | 8.040759 | -8.6444  | 3.90E-13 | 4.01E-12 | 19.43817 |
| IL10RB   | 0.510455 | 1.424499 | 5.298228 | 8.639957 | 3.98E-13 | 4.09E-12 | 19.41816 |
| GPNMB    | 1.098564 | 2.141414 | 7.850633 | 8.634441 | 4.08E-13 | 4.19E-12 | 19.39329 |
| TLR1     | 0.776173 | 1.712581 | 4.528354 | 8.627852 | 4.21E-13 | 4.31E-12 | 19.36358 |
| SACS     | 0.660573 | 1.58071  | 4.333544 | 8.626239 | 4.24E-13 | 4.34E-12 | 19.3563  |
| CD93     | 0.639848 | 1.558166 | 7.362278 | 8.620368 | 4.35E-13 | 4.45E-12 | 19.32983 |
| COASY    | -0.36099 | 0.778631 | 8.627468 | -8.61933 | 4.38E-13 | 4.47E-12 | 19.32517 |
| FGGY     | -0.4447  | 0.734739 | 7.589241 | -8.61767 | 4.41E-13 | 4.50E-12 | 19.31765 |
| HMOX2    | -0.36016 | 0.779079 | 7.706076 | -8.61384 | 4.49E-13 | 4.57E-12 | 19.30041 |
| TRAM2    | 0.384769 | 1.305651 | 6.188987 | 8.609282 | 4.58E-13 | 4.66E-12 | 19.27985 |
| GZMK     | 1.381258 | 2.604955 | 6.316329 | 8.607958 | 4.61E-13 | 4.68E-12 | 19.27388 |
| SUCLG2   | -0.54564 | 0.685088 | 9.414684 | -8.60433 | 4.68E-13 | 4.75E-12 | 19.25752 |
| YRDC     | -0.39235 | 0.761887 | 7.029367 | -8.60118 | 4.75E-13 | 4.82E-12 | 19.2433  |
| GSTK1    | -0.35925 | 0.77957  | 10.35646 | -8.5951  | 4.89E-13 | 4.95E-12 | 19.21592 |
| ARAP2    | 0.488564 | 1.403048 | 5.335823 | 8.591847 | 4.96E-13 | 5.02E-12 | 19.20124 |
| DUS1L    | -0.39221 | 0.76196  | 7.797468 | -8.58981 | 5.01E-13 | 5.06E-12 | 19.19206 |
| ACSL5    | 0.504644 | 1.418773 | 5.707975 | 8.588628 | 5.03E-13 | 5.08E-12 | 19.18673 |
| VTI1B    | -0.31658 | 0.802971 | 9.967975 | -8.58819 | 5.04E-13 | 5.08E-12 | 19.18476 |
| SLC39A6  | 0.670125 | 1.591211 | 7.641013 | 8.588074 | 5.05E-13 | 5.08E-12 | 19.18424 |
| PCK1     | -1.23353 | 0.425275 | 11.88038 | -8.58726 | 5.06E-13 | 5.09E-12 | 19.18056 |
| C3AR1    | 0.883544 | 1.844902 | 6.28038  | 8.58721  | 5.07E-13 | 5.09E-12 | 19.18034 |
| ALS2CL   | -0.45099 | 0.731542 | 6.719873 | -8.5863  | 5.09E-13 | 5.10E-12 | 19.17623 |
| SYNGR2   | 0.412358 | 1.33086  | 8.867468 | 8.583901 | 5.14E-13 | 5.15E-12 | 19.16542 |

|          |          |          |          |          |          |          |          |
|----------|----------|----------|----------|----------|----------|----------|----------|
| HSP90B1  | 0.640145 | 1.558486 | 9.803924 | 8.575287 | 5.35E-13 | 5.35E-12 | 19.12659 |
| UPF2     | 0.394993 | 1.314937 | 6.481519 | 8.570202 | 5.47E-13 | 5.47E-12 | 19.10367 |
| DDX58    | 0.729901 | 1.658525 | 5.387722 | 8.565713 | 5.59E-13 | 5.58E-12 | 19.08343 |
| CRY2     | -0.46134 | 0.726309 | 7.067722 | -8.55645 | 5.83E-13 | 5.81E-12 | 19.04166 |
| FAM13B   | 0.557767 | 1.471989 | 7.348861 | 8.553222 | 5.91E-13 | 5.89E-12 | 19.02713 |
| ACO2     | -0.5401  | 0.687724 | 9.997215 | -8.5527  | 5.93E-13 | 5.90E-12 | 19.02479 |
| ACTG1    | 0.501733 | 1.415913 | 12.30937 | 8.54708  | 6.08E-13 | 6.04E-12 | 18.99945 |
| SIRT2    | -0.32405 | 0.798823 | 8.270506 | -8.54647 | 6.10E-13 | 6.05E-12 | 18.9967  |
| COL15A1  | 1.019625 | 2.027391 | 5.502658 | 8.545186 | 6.14E-13 | 6.08E-12 | 18.99091 |
| DBN1     | 0.402227 | 1.321546 | 6.823671 | 8.544973 | 6.14E-13 | 6.08E-12 | 18.98995 |
| TRIM38   | 0.549967 | 1.464052 | 7.727342 | 8.541802 | 6.23E-13 | 6.16E-12 | 18.97566 |
| GNAS     | 0.32388  | 1.251692 | 11.21899 | 8.541438 | 6.24E-13 | 6.16E-12 | 18.97401 |
| AGRN     | 0.377549 | 1.299133 | 6.853797 | 8.54088  | 6.26E-13 | 6.17E-12 | 18.9715  |
| ISG15    | 1.558235 | 2.944932 | 7.328734 | 8.539402 | 6.30E-13 | 6.21E-12 | 18.96484 |
| PERP     | 0.68083  | 1.603062 | 6.422658 | 8.537023 | 6.37E-13 | 6.27E-12 | 18.95412 |
| PIGV     | -0.32835 | 0.796449 | 7.540886 | -8.5356  | 6.41E-13 | 6.30E-12 | 18.94771 |
| P4HA2    | -0.85936 | 0.551197 | 9.133418 | -8.52054 | 6.87E-13 | 6.74E-12 | 18.87983 |
| TDP2     | -0.45377 | 0.730133 | 10.27089 | -8.51987 | 6.89E-13 | 6.75E-12 | 18.87682 |
| SLC15A3  | 0.464045 | 1.379404 | 5.899494 | 8.518138 | 6.94E-13 | 6.80E-12 | 18.869   |
| VGLL4    | 0.313426 | 1.242655 | 7.70962  | 8.507777 | 7.28E-13 | 7.12E-12 | 18.82231 |
| SARDH    | -0.39999 | 0.757865 | 5.359873 | -8.50749 | 7.29E-13 | 7.12E-12 | 18.821   |
| MUT      | -0.4916  | 0.711235 | 8.27443  | -8.50627 | 7.33E-13 | 7.15E-12 | 18.81553 |
| ACOT11   | -0.51708 | 0.698784 | 7.289873 | -8.50164 | 7.48E-13 | 7.30E-12 | 18.79464 |
| GSTM4    | -0.66005 | 0.632858 | 6.484937 | -8.49359 | 7.76E-13 | 7.56E-12 | 18.75837 |
| PTPRN2   | 0.384967 | 1.30583  | 6.173418 | 8.489825 | 7.90E-13 | 7.68E-12 | 18.74142 |
| RSPH14   | -0.46509 | 0.724428 | 6.350506 | -8.48758 | 7.98E-13 | 7.75E-12 | 18.73132 |
| HPRT1    | 0.485059 | 1.399643 | 8.473924 | 8.486377 | 8.02E-13 | 7.79E-12 | 18.72589 |
| EHHADH   | -0.82379 | 0.564957 | 8.610886 | -8.48019 | 8.25E-13 | 8.00E-12 | 18.69802 |
| LRPPRC   | -0.40724 | 0.754065 | 8.952278 | -8.47911 | 8.29E-13 | 8.02E-12 | 18.69312 |
| ARHGAP25 | 0.651897 | 1.571233 | 9.124051 | 8.478818 | 8.30E-13 | 8.02E-12 | 18.69183 |
| VSIG10   | 0.339756 | 1.265543 | 5.228228 | 8.478647 | 8.31E-13 | 8.02E-12 | 18.69105 |
| FAM57A   | 0.456087 | 1.371816 | 5.90443  | 8.47854  | 8.31E-13 | 8.02E-12 | 18.69057 |
| FKBP8    | -0.36675 | 0.775526 | 6.206582 | -8.4766  | 8.39E-13 | 8.09E-12 | 18.68184 |
| ADGRE5   | 0.672569 | 1.593909 | 5.747468 | 8.474309 | 8.48E-13 | 8.16E-12 | 18.67151 |
| NEK11    | 0.368966 | 1.291427 | 6.103038 | 8.472606 | 8.54E-13 | 8.22E-12 | 18.66384 |
| EED      | 0.365441 | 1.288276 | 4.645696 | 8.471243 | 8.60E-13 | 8.26E-12 | 18.6577  |
| SLC1A1   | -0.66848 | 0.629167 | 8.730759 | -8.46514 | 8.84E-13 | 8.48E-12 | 18.6302  |
| SULT1C2  | -0.52841 | 0.693317 | 8.682532 | -8.46282 | 8.93E-13 | 8.56E-12 | 18.61973 |
| SLC22A13 | -0.74986 | 0.594661 | 5.79481  | -8.45553 | 9.23E-13 | 8.84E-12 | 18.58693 |
| IFIT3    | 0.957101 | 1.941405 | 7.419367 | 8.455338 | 9.24E-13 | 8.84E-12 | 18.58604 |
| KLRB1    | 1.258393 | 2.392291 | 5.966962 | 8.454947 | 9.26E-13 | 8.84E-12 | 18.58428 |
| MRPL49   | -0.26358 | 0.833016 | 9.977722 | -8.45471 | 9.27E-13 | 8.84E-12 | 18.5832  |
| TLR5     | 0.568037 | 1.482505 | 5.460759 | 8.453783 | 9.31E-13 | 8.87E-12 | 18.57904 |
| SUN2     | -0.37291 | 0.772226 | 8.135316 | -8.45178 | 9.39E-13 | 8.94E-12 | 18.57003 |
| DHPS     | -0.28749 | 0.819326 | 7.170127 | -8.45093 | 9.43E-13 | 8.97E-12 | 18.56617 |
| ABHD6    | -0.70325 | 0.614188 | 7.906456 | -8.45007 | 9.47E-13 | 8.99E-12 | 18.56233 |
| TXNRD2   | -0.38723 | 0.764598 | 6.807595 | -8.44639 | 9.63E-13 | 9.13E-12 | 18.54572 |



|          |          |          |          |          |          |          |          |
|----------|----------|----------|----------|----------|----------|----------|----------|
| RAB32    | 0.461482 | 1.376956 | 8.07038  | 8.444476 | 9.71E-13 | 9.20E-12 | 18.53711 |
| FBXL5    | -0.43774 | 0.73829  | 9.09519  | -8.44441 | 9.71E-13 | 9.20E-12 | 18.5368  |
| DPY19L1  | 0.430896 | 1.34807  | 5.433038 | 8.444193 | 9.72E-13 | 9.20E-12 | 18.53584 |
| PROZ     | -1.04502 | 0.484638 | 7.273038 | -8.44315 | 9.77E-13 | 9.23E-12 | 18.53115 |
| DNAJA3   | -0.2931  | 0.816145 | 9.264304 | -8.44254 | 9.80E-13 | 9.24E-12 | 18.52841 |
| CRTC3    | 0.388248 | 1.308803 | 7.856962 | 8.442459 | 9.80E-13 | 9.24E-12 | 18.52803 |
| PKP2     | -0.45242 | 0.730817 | 5.189494 | -8.43154 | 1.03E-12 | 9.70E-12 | 18.47882 |
| GATB     | -0.36974 | 0.773924 | 6.904684 | -8.42886 | 1.04E-12 | 9.80E-12 | 18.46677 |
| HSD17B10 | -0.34482 | 0.787405 | 10.09987 | -8.42867 | 1.04E-12 | 9.80E-12 | 18.46591 |
| POLDIP2  | -0.3358  | 0.792346 | 8.768861 | -8.42694 | 1.05E-12 | 9.87E-12 | 18.45811 |
| CCS      | -0.40366 | 0.75594  | 7.635949 | -8.42608 | 1.06E-12 | 9.90E-12 | 18.45426 |
| CALHM2   | 0.393379 | 1.313467 | 5.523671 | 8.423403 | 1.07E-12 | 1.00E-11 | 18.44219 |
| CD83     | -0.71818 | 0.607863 | 7.93     | -8.42213 | 1.08E-12 | 1.01E-11 | 18.43646 |
| CCT6B    | -0.56931 | 0.67394  | 5.402405 | -8.42005 | 1.09E-12 | 1.01E-11 | 18.42709 |
| TNFSF10  | 0.955988 | 1.939908 | 9.786076 | 8.412758 | 1.12E-12 | 1.05E-11 | 18.39425 |
| PLOD2    | 0.623762 | 1.540887 | 7.151646 | 8.412292 | 1.12E-12 | 1.05E-11 | 18.39215 |
| PMVK     | -0.39034 | 0.762952 | 8.474557 | -8.41128 | 1.13E-12 | 1.05E-11 | 18.38759 |
| ARG2     | -0.75565 | 0.592279 | 8.25     | -8.40916 | 1.14E-12 | 1.06E-11 | 18.37804 |
| PFKP     | 0.869987 | 1.827646 | 7.916456 | 8.404903 | 1.16E-12 | 1.08E-11 | 18.35887 |
| RARRES1  | 1.573287 | 2.97582  | 5.957848 | 8.404853 | 1.16E-12 | 1.08E-11 | 18.35865 |
| GLRX5    | -0.35728 | 0.780635 | 10.60228 | -8.40284 | 1.17E-12 | 1.09E-11 | 18.34959 |
| PALM     | -0.48866 | 0.712685 | 7.416962 | -8.39638 | 1.21E-12 | 1.12E-11 | 18.32049 |
| MRC1     | 1.368379 | 2.581804 | 6.825949 | 8.389293 | 1.25E-12 | 1.16E-11 | 18.28858 |
| ARL4C    | 1.27139  | 2.41394  | 6.35     | 8.38565  | 1.27E-12 | 1.17E-11 | 18.27218 |
| MAPKAP1  | -0.48317 | 0.715405 | 7.440127 | -8.37991 | 1.30E-12 | 1.20E-11 | 18.24635 |
| SUPV3L1  | -0.33497 | 0.792799 | 7.108987 | -8.3794  | 1.31E-12 | 1.20E-11 | 18.24405 |
| MUC1     | 0.773274 | 1.709144 | 8.126709 | 8.376896 | 1.32E-12 | 1.22E-11 | 18.23276 |
| ACAA2    | -0.34991 | 0.784631 | 7.044051 | -8.37346 | 1.34E-12 | 1.23E-11 | 18.2173  |
| LCP2     | 0.786331 | 1.724682 | 4.576076 | 8.369642 | 1.37E-12 | 1.25E-11 | 18.2001  |
| ZNF358   | -0.38738 | 0.764518 | 6.152532 | -8.36954 | 1.37E-12 | 1.25E-11 | 18.19964 |
| IMPDH1   | 0.674717 | 1.596283 | 7.532278 | 8.364418 | 1.40E-12 | 1.28E-11 | 18.17658 |
| ZNF200   | 0.330428 | 1.257387 | 5.219114 | 8.361634 | 1.42E-12 | 1.30E-11 | 18.16405 |
| IL7R     | 1.26639  | 2.405589 | 5.572911 | 8.360002 | 1.43E-12 | 1.31E-11 | 18.1567  |
| ADM      | -1.1957  | 0.436575 | 9.146835 | -8.35962 | 1.43E-12 | 1.31E-11 | 18.15498 |
| TRIM32   | 0.339071 | 1.264942 | 6.116203 | 8.355571 | 1.46E-12 | 1.33E-11 | 18.13675 |
| AOAH     | 0.795949 | 1.736219 | 5.088354 | 8.350233 | 1.49E-12 | 1.36E-11 | 18.11272 |
| GCDH     | -0.75402 | 0.59295  | 7.603291 | -8.34672 | 1.52E-12 | 1.38E-11 | 18.09692 |
| ATXN7L1  | -0.37419 | 0.771539 | 4.661519 | -8.34667 | 1.52E-12 | 1.38E-11 | 18.09669 |
| IDH3G    | -0.31547 | 0.803587 | 8.862785 | -8.34368 | 1.54E-12 | 1.40E-11 | 18.08323 |
| SURF1    | -0.3947  | 0.760649 | 9.280127 | -8.34227 | 1.55E-12 | 1.41E-11 | 18.07688 |
| TSC22D1  | 0.391482 | 1.31174  | 8.661139 | 8.337664 | 1.58E-12 | 1.43E-11 | 18.05614 |
| CSTB     | 0.686726 | 1.609626 | 10.92316 | 8.336113 | 1.59E-12 | 1.44E-11 | 18.04916 |
| IL7      | 0.492497 | 1.406877 | 3.888987 | 8.335048 | 1.60E-12 | 1.45E-11 | 18.04437 |
| STOML2   | -0.31538 | 0.803642 | 8.83     | -8.33396 | 1.61E-12 | 1.45E-11 | 18.03949 |
| P4HA1    | -0.81328 | 0.569086 | 8.058101 | -8.33309 | 1.61E-12 | 1.46E-11 | 18.03557 |
| FRAT2    | 0.48865  | 1.403131 | 5.516076 | 8.329944 | 1.64E-12 | 1.48E-11 | 18.0214  |
| IGHM     | 2.435507 | 5.409545 | 6.80519  | 8.328614 | 1.65E-12 | 1.48E-11 | 18.01541 |

|           |          |          |          |          |          |          |          |
|-----------|----------|----------|----------|----------|----------|----------|----------|
| PLXND1    | 0.423162 | 1.340863 | 5.796329 | 8.328037 | 1.65E-12 | 1.49E-11 | 18.01282 |
| OAT       | -0.69288 | 0.618618 | 10.58557 | -8.32106 | 1.70E-12 | 1.53E-11 | 17.98142 |
| AURKAIP1  | -0.28479 | 0.820862 | 9.567342 | -8.31801 | 1.73E-12 | 1.55E-11 | 17.96769 |
| HYI       | -0.34615 | 0.786683 | 7.46519  | -8.29963 | 1.88E-12 | 1.69E-11 | 17.88499 |
| MYO1F     | 0.666304 | 1.587002 | 6.122025 | 8.298233 | 1.89E-12 | 1.70E-11 | 17.87869 |
| PANX1     | 0.343155 | 1.268528 | 5.30443  | 8.294434 | 1.92E-12 | 1.72E-11 | 17.8616  |
| SWAP70    | 0.497444 | 1.411171 | 6.088228 | 8.29432  | 1.93E-12 | 1.72E-11 | 17.86109 |
| NDUFAB3   | -0.34853 | 0.785383 | 8.975063 | -8.28851 | 1.98E-12 | 1.77E-11 | 17.83497 |
| DEXI      | -0.43871 | 0.737795 | 7.948481 | -8.28717 | 1.99E-12 | 1.78E-11 | 17.82891 |
| APOC1     | 1.53691  | 2.901724 | 8.375696 | 8.286707 | 1.99E-12 | 1.78E-11 | 17.82683 |
| SLC35D1   | -0.45614 | 0.728934 | 6.907722 | -8.28594 | 2.00E-12 | 1.78E-11 | 17.82337 |
| IGSF6     | 0.896653 | 1.861742 | 4.127595 | 8.284079 | 2.02E-12 | 1.80E-11 | 17.81501 |
| PPAP2C    | 0.672207 | 1.593509 | 4.871013 | 8.278482 | 2.07E-12 | 1.84E-11 | 17.78983 |
| MIR22HG   | -0.76074 | 0.590194 | 8.462658 | -8.27562 | 2.10E-12 | 1.86E-11 | 17.77697 |
| MID1      | 0.587563 | 1.502706 | 6.438481 | 8.274914 | 2.10E-12 | 1.87E-11 | 17.77378 |
| ELF2      | 0.385744 | 1.306534 | 6.844177 | 8.274753 | 2.10E-12 | 1.87E-11 | 17.77305 |
| FN1       | 0.616779 | 1.533447 | 6.171772 | 8.274445 | 2.11E-12 | 1.87E-11 | 17.77167 |
| ARHGAP25  | 0.568327 | 1.482803 | 5.603924 | 8.273213 | 2.12E-12 | 1.87E-11 | 17.76613 |
| ACSM3     | -0.8264  | 0.563933 | 8.173924 | -8.26054 | 2.25E-12 | 1.98E-11 | 17.70913 |
| TUBB      | 0.515178 | 1.42917  | 9.199114 | 8.259179 | 2.26E-12 | 1.99E-11 | 17.703   |
| TMED3     | 0.449914 | 1.365959 | 7.827722 | 8.254869 | 2.30E-12 | 2.03E-11 | 17.68361 |
| DDX60     | 0.862253 | 1.817875 | 6.679747 | 8.253815 | 2.32E-12 | 2.04E-11 | 17.67887 |
| NSMF      | -0.44108 | 0.736583 | 6.735316 | -8.25035 | 2.35E-12 | 2.07E-11 | 17.66329 |
| GABARAPL  | -0.58173 | 0.668161 | 8.187215 | -8.24745 | 2.38E-12 | 2.09E-11 | 17.65026 |
| AGBL5     | -0.26945 | 0.829634 | 7.081139 | -8.24709 | 2.39E-12 | 2.10E-11 | 17.64863 |
| CCL21     | 1.029506 | 2.041325 | 6.174177 | 8.246814 | 2.39E-12 | 2.10E-11 | 17.64738 |
| TOLLIP    | -0.36346 | 0.777299 | 7.347089 | -8.24591 | 2.40E-12 | 2.10E-11 | 17.64334 |
| LCK       | 0.687681 | 1.610693 | 4.902911 | 8.242767 | 2.43E-12 | 2.13E-11 | 17.62919 |
| KRT19     | 1.199453 | 2.296526 | 8.017342 | 8.238942 | 2.48E-12 | 2.17E-11 | 17.61198 |
| KIAA0226L | 0.520863 | 1.434813 | 4.058228 | 8.234942 | 2.52E-12 | 2.20E-11 | 17.59399 |
| COX6A2    | -0.50188 | 0.706187 | 5.904051 | -8.23238 | 2.55E-12 | 2.23E-11 | 17.58247 |
| GOS2      | -1.20002 | 0.435269 | 9.013291 | -8.23038 | 2.58E-12 | 2.25E-11 | 17.57348 |
| PPL       | 0.614895 | 1.531446 | 6.666203 | 8.224997 | 2.64E-12 | 2.30E-11 | 17.54927 |
| ITGAM     | 0.775547 | 1.711839 | 4.922658 | 8.220919 | 2.69E-12 | 2.34E-11 | 17.53094 |
| ENPP2     | -0.53154 | 0.691815 | 9.464051 | -8.22075 | 2.69E-12 | 2.34E-11 | 17.53018 |
| SLC2A10   | 0.605184 | 1.521173 | 4.89519  | 8.215114 | 2.76E-12 | 2.40E-11 | 17.50484 |
| PARP1     | 0.294592 | 1.226538 | 7.862405 | 8.212808 | 2.79E-12 | 2.42E-11 | 17.49447 |
| PDIA4     | 0.471008 | 1.386077 | 7.533924 | 8.212162 | 2.80E-12 | 2.42E-11 | 17.49157 |
| GHITM     | -0.30102 | 0.811678 | 11.33013 | -8.21053 | 2.82E-12 | 2.44E-11 | 17.48421 |
| PIIB      | 0.448215 | 1.364351 | 10.22962 | 8.208991 | 2.84E-12 | 2.45E-11 | 17.47731 |
| CY5R1     | -0.41072 | 0.752249 | 9.334304 | -8.20874 | 2.84E-12 | 2.45E-11 | 17.4762  |
| GSTA3     | -0.56591 | 0.67553  | 7.178608 | -8.20749 | 2.86E-12 | 2.47E-11 | 17.47055 |
| GNB5      | -0.49196 | 0.711057 | 7.767975 | -8.20693 | 2.87E-12 | 2.47E-11 | 17.46805 |
| NIPSNAP1  | -0.53141 | 0.691878 | 9.233671 | -8.20377 | 2.91E-12 | 2.50E-11 | 17.45382 |
| BAZ1A     | 0.48749  | 1.402004 | 4.873418 | 8.200454 | 2.95E-12 | 2.54E-11 | 17.43893 |
| CECR1     | 1.103742 | 2.149114 | 7.526709 | 8.197694 | 2.99E-12 | 2.57E-11 | 17.42652 |
| KLHL3     | -0.65321 | 0.635862 | 7.619747 | -8.19515 | 3.02E-12 | 2.60E-11 | 17.41508 |

|          |          |          |          |          |          |          |          |
|----------|----------|----------|----------|----------|----------|----------|----------|
| NECAB3   | -0.31992 | 0.801114 | 6.368101 | -8.19392 | 3.04E-12 | 2.61E-11 | 17.40958 |
| SMAD1    | 0.506107 | 1.420212 | 7.240759 | 8.193854 | 3.04E-12 | 2.61E-11 | 17.40926 |
| CUBN     | -1.0715  | 0.475826 | 11.17785 | -8.19337 | 3.05E-12 | 2.61E-11 | 17.40709 |
| FAM110B  | 0.55419  | 1.468344 | 6.053671 | 8.190842 | 3.08E-12 | 2.64E-11 | 17.39573 |
| MXI1     | -0.3936  | 0.761229 | 9.186456 | -8.18873 | 3.11E-12 | 2.66E-11 | 17.38625 |
| PEX10    | -0.20341 | 0.868498 | 6.281772 | -8.17988 | 3.24E-12 | 2.77E-11 | 17.34644 |
| PEA15    | 0.511166 | 1.425202 | 7.534177 | 8.176588 | 3.29E-12 | 2.80E-11 | 17.33166 |
| ACADM    | -0.6484  | 0.637988 | 10.29937 | -8.17606 | 3.30E-12 | 2.81E-11 | 17.32927 |
| TOP2B    | 0.417437 | 1.335553 | 7.916329 | 8.174273 | 3.33E-12 | 2.83E-11 | 17.32125 |
| CCND3    | 0.430237 | 1.347455 | 8.334937 | 8.170917 | 3.38E-12 | 2.87E-11 | 17.30617 |
| MX1      | 1.21805  | 2.326321 | 7.239241 | 8.170705 | 3.38E-12 | 2.87E-11 | 17.30522 |
| IGFBP7   | 0.337457 | 1.263528 | 12.04835 | 8.16945  | 3.40E-12 | 2.88E-11 | 17.29958 |
| NFKB1    | 0.369657 | 1.292046 | 7.623544 | 8.168967 | 3.41E-12 | 2.89E-11 | 17.29741 |
| BCKDHB   | -0.42779 | 0.743401 | 6.97     | -8.16821 | 3.42E-12 | 2.89E-11 | 17.29403 |
| COL1A1   | 0.743439 | 1.674162 | 5.266203 | 8.165519 | 3.46E-12 | 2.93E-11 | 17.28192 |
| CLPB     | -0.43137 | 0.741557 | 5.996329 | -8.16393 | 3.49E-12 | 2.94E-11 | 17.27478 |
| SLC38A10 | -0.34102 | 0.789482 | 7.093418 | -8.16372 | 3.49E-12 | 2.94E-11 | 17.27384 |
| VPS13C   | 0.459084 | 1.374669 | 7.633291 | 8.161273 | 3.53E-12 | 2.97E-11 | 17.26283 |
| MSH3     | -0.45257 | 0.73074  | 6.09443  | -8.16105 | 3.53E-12 | 2.97E-11 | 17.26185 |
| TOR4A    | 0.430369 | 1.347578 | 6.154557 | 8.15836  | 3.58E-12 | 3.01E-11 | 17.24975 |
| CRELD2   | 0.465474 | 1.380771 | 8.209873 | 8.152894 | 3.67E-12 | 3.08E-11 | 17.22519 |
| CLTB     | -0.37245 | 0.772469 | 7.770506 | -8.1499  | 3.72E-12 | 3.12E-11 | 17.21175 |
| MCCC1    | -0.46775 | 0.72309  | 8.665696 | -8.14769 | 3.75E-12 | 3.15E-11 | 17.20182 |
| KL       | -1.01449 | 0.495005 | 10.10253 | -8.14618 | 3.78E-12 | 3.17E-11 | 17.19503 |
| NOX4     | -0.96573 | 0.512019 | 10.40051 | -8.14235 | 3.85E-12 | 3.22E-11 | 17.17781 |
| KIF2A    | 0.300356 | 1.231448 | 5.413291 | 8.140726 | 3.87E-12 | 3.24E-11 | 17.17052 |
| VAMP2    | -0.28879 | 0.81859  | 6.199367 | -8.13877 | 3.91E-12 | 3.27E-11 | 17.16171 |
| GLS      | -0.46094 | 0.726512 | 10.22506 | -8.13658 | 3.95E-12 | 3.29E-11 | 17.15189 |
| NME1     | 0.495184 | 1.409501 | 9.209241 | 8.132767 | 4.02E-12 | 3.35E-11 | 17.13477 |
| IPO13    | -0.33486 | 0.792864 | 7.211646 | -8.13148 | 4.04E-12 | 3.36E-11 | 17.129   |
| HLA-DQB1 | 1.726061 | 3.308232 | 6.771013 | 8.131467 | 4.04E-12 | 3.36E-11 | 17.12892 |
| NECAB2   | -0.808   | 0.571174 | 7.479873 | -8.1308  | 4.05E-12 | 3.37E-11 | 17.12595 |
| FUBP1    | 0.34836  | 1.273112 | 7.62443  | 8.126441 | 4.13E-12 | 3.43E-11 | 17.10635 |
| THEM6    | -0.38956 | 0.763363 | 6.775316 | -8.12463 | 4.17E-12 | 3.46E-11 | 17.09823 |
| CERS2    | -0.3551  | 0.781816 | 10.24949 | -8.12429 | 4.17E-12 | 3.46E-11 | 17.09669 |
| RHOF     | 0.407971 | 1.326818 | 6.459114 | 8.123454 | 4.19E-12 | 3.47E-11 | 17.09293 |
| RPS3     | 0.424816 | 1.342401 | 12.22506 | 8.1213   | 4.23E-12 | 3.50E-11 | 17.08326 |
| IGLL3P   | 2.995264 | 7.973778 | 6.225316 | 8.116548 | 4.32E-12 | 3.57E-11 | 17.06192 |
| TMEM123  | 0.595481 | 1.510976 | 8.712658 | 8.113379 | 4.39E-12 | 3.62E-11 | 17.04769 |
| BNIP2    | 0.358491 | 1.282085 | 5.668228 | 8.11104  | 4.43E-12 | 3.66E-11 | 17.03718 |
| CUTC     | -0.37129 | 0.77309  | 6.623165 | -8.10704 | 4.52E-12 | 3.72E-11 | 17.0192  |
| BTN3A3   | 0.617668 | 1.534393 | 4.776709 | 8.098656 | 4.69E-12 | 3.86E-11 | 16.98157 |
| SNX27    | -0.30689 | 0.808382 | 7.063544 | -8.09842 | 4.70E-12 | 3.86E-11 | 16.98052 |
| MAPK13   | 0.410296 | 1.328959 | 6.102911 | 8.09731  | 4.72E-12 | 3.88E-11 | 16.97553 |
| HNRNPR   | 0.37081  | 1.293079 | 8.387722 | 8.097107 | 4.72E-12 | 3.88E-11 | 16.97461 |
| GPHN     | -0.54181 | 0.686911 | 7.420633 | -8.09597 | 4.75E-12 | 3.89E-11 | 16.96953 |
| SLC39A14 | -0.58115 | 0.668432 | 8.002025 | -8.08241 | 5.05E-12 | 4.14E-11 | 16.90862 |

|         |          |          |          |          |          |          |          |
|---------|----------|----------|----------|----------|----------|----------|----------|
| ST7     | -0.34866 | 0.785315 | 6.763924 | -8.08067 | 5.09E-12 | 4.17E-11 | 16.9008  |
| AGPAT3  | -0.39819 | 0.758811 | 7.21519  | -8.07968 | 5.11E-12 | 4.18E-11 | 16.89637 |
| ABHD14A | -0.78701 | 0.579544 | 8.21038  | -8.07866 | 5.14E-12 | 4.20E-11 | 16.89178 |
| VPS35   | 0.350771 | 1.275242 | 10.01848 | 8.078025 | 5.15E-12 | 4.20E-11 | 16.88894 |
| TYRO3   | -0.38094 | 0.767936 | 5.738481 | -8.07615 | 5.20E-12 | 4.24E-11 | 16.88053 |
| XPO7    | -0.37599 | 0.770577 | 7.676203 | -8.07482 | 5.23E-12 | 4.26E-11 | 16.87455 |
| SELL    | 1.080784 | 2.115185 | 5.35038  | 8.074181 | 5.24E-12 | 4.27E-11 | 16.87169 |
| BTF3    | 0.353742 | 1.277871 | 10.09342 | 8.073681 | 5.25E-12 | 4.27E-11 | 16.86944 |
| NAP1L1  | 0.507154 | 1.421244 | 8.329241 | 8.067268 | 5.41E-12 | 4.39E-11 | 16.84066 |
| PDE8A   | -0.4214  | 0.746698 | 8.098101 | -8.06652 | 5.43E-12 | 4.40E-11 | 16.83729 |
| MDFIC   | 0.279381 | 1.213674 | 4.589747 | 8.066153 | 5.44E-12 | 4.41E-11 | 16.83565 |
| CDK14   | -0.36321 | 0.777434 | 6.929367 | -8.06526 | 5.46E-12 | 4.42E-11 | 16.83165 |
| WDR45   | -0.37281 | 0.772279 | 7.412532 | -8.05898 | 5.62E-12 | 4.55E-11 | 16.80346 |
| ESM1    | -0.90796 | 0.532937 | 5.510506 | -8.04935 | 5.87E-12 | 4.74E-11 | 16.76023 |
| LGALS1  | -0.36214 | 0.778009 | 6.523291 | -8.04798 | 5.91E-12 | 4.77E-11 | 16.75409 |
| CD247   | 0.653577 | 1.573064 | 4.716709 | 8.047244 | 5.93E-12 | 4.78E-11 | 16.75079 |
| SPECC1L | 0.314816 | 1.243853 | 6.899114 | 8.046471 | 5.95E-12 | 4.79E-11 | 16.74732 |
| MYL12A  | 0.535988 | 1.449935 | 10.73063 | 8.045548 | 5.97E-12 | 4.81E-11 | 16.74318 |
| MAN2B1  | 0.63865  | 1.556871 | 7.188734 | 8.043086 | 6.04E-12 | 4.86E-11 | 16.73213 |
| KCNH6   | -0.5031  | 0.705591 | 5.025063 | -8.04149 | 6.08E-12 | 4.89E-11 | 16.72499 |
| GALT    | -0.3603  | 0.779001 | 7.159494 | -8.04005 | 6.12E-12 | 4.92E-11 | 16.71851 |
| PVALB   | -1.45486 | 0.364792 | 7.643797 | -8.03963 | 6.13E-12 | 4.92E-11 | 16.71661 |
| TEX264  | -0.40623 | 0.754592 | 7.859873 | -8.03893 | 6.15E-12 | 4.93E-11 | 16.71348 |
| FLNA    | 0.520573 | 1.434525 | 6.745063 | 8.038318 | 6.17E-12 | 4.94E-11 | 16.71074 |
| AK2     | -0.38414 | 0.766234 | 7.006709 | -8.03468 | 6.27E-12 | 5.02E-11 | 16.69441 |
| GNAI1   | 0.83753  | 1.786988 | 6.210506 | 8.033972 | 6.29E-12 | 5.03E-11 | 16.69124 |
| GSTP1   | 0.615303 | 1.53188  | 9.102025 | 8.029848 | 6.41E-12 | 5.12E-11 | 16.67274 |
| MFNG    | 0.500119 | 1.41433  | 5.151519 | 8.029006 | 6.44E-12 | 5.13E-11 | 16.66896 |
| LRRC19  | -0.70122 | 0.615052 | 8.608608 | -8.02699 | 6.50E-12 | 5.18E-11 | 16.65992 |
| PON2    | 0.78193  | 1.71943  | 8.490759 | 8.024684 | 6.57E-12 | 5.23E-11 | 16.64957 |
| TMEM50A | 0.34809  | 1.272874 | 8.906709 | 8.018279 | 6.76E-12 | 5.38E-11 | 16.62084 |
| ZCCHC24 | 0.595975 | 1.511494 | 6.338734 | 8.015637 | 6.84E-12 | 5.44E-11 | 16.60899 |
| GUSBP11 | 2.808663 | 7.006348 | 8.072152 | 8.014207 | 6.89E-12 | 5.46E-11 | 16.60257 |
| AKAP12  | 1.012602 | 2.017547 | 8.301899 | 8.014176 | 6.89E-12 | 5.46E-11 | 16.60243 |
| SMARCD3 | 0.616818 | 1.533489 | 5.742658 | 8.013541 | 6.91E-12 | 5.47E-11 | 16.59959 |
| ADCY7   | 0.370237 | 1.292565 | 4.319873 | 8.01173  | 6.96E-12 | 5.51E-11 | 16.59146 |
| APOE    | -0.90149 | 0.535334 | 11.24734 | -8.00938 | 7.04E-12 | 5.57E-11 | 16.58093 |
| AGAP1   | -0.40621 | 0.754602 | 6.515316 | -8.00771 | 7.09E-12 | 5.60E-11 | 16.57343 |
| CLIC2   | 0.706166 | 1.631463 | 4.530633 | 8.007448 | 7.10E-12 | 5.60E-11 | 16.57226 |
| FAM89B  | 0.261673 | 1.198868 | 7.002785 | 8.005636 | 7.16E-12 | 5.65E-11 | 16.56413 |
| SMARCA5 | 0.333142 | 1.259754 | 6.333291 | 7.995917 | 7.48E-12 | 5.90E-11 | 16.52054 |
| PMP22   | 0.716285 | 1.642945 | 7.207468 | 7.992393 | 7.60E-12 | 5.98E-11 | 16.50474 |
| FANCL   | 0.468452 | 1.383624 | 5.583291 | 7.992246 | 7.61E-12 | 5.98E-11 | 16.50408 |
| CST6    | 0.640909 | 1.559311 | 4.577722 | 7.988542 | 7.74E-12 | 6.08E-11 | 16.48748 |
| VSTM4   | -0.49061 | 0.711723 | 5.836582 | -7.98778 | 7.76E-12 | 6.09E-11 | 16.48405 |
| POSTN   | 1.798241 | 3.477959 | 6.317468 | 7.987461 | 7.78E-12 | 6.10E-11 | 16.48263 |
| C9orf16 | 0.317358 | 1.246047 | 7.772785 | 7.985799 | 7.83E-12 | 6.14E-11 | 16.47518 |

|         |          |          |          |          |          |          |          |
|---------|----------|----------|----------|----------|----------|----------|----------|
| MAP3K12 | -0.24993 | 0.840935 | 6.52038  | -7.98179 | 7.98E-12 | 6.25E-11 | 16.4572  |
| RARRES3 | 0.975922 | 1.966898 | 9.19962  | 7.981259 | 8.00E-12 | 6.25E-11 | 16.45482 |
| IFNAR2  | 0.379855 | 1.301211 | 5.652152 | 7.975918 | 8.19E-12 | 6.40E-11 | 16.43088 |
| ERGIC2  | 0.43222  | 1.349308 | 7.797722 | 7.973175 | 8.30E-12 | 6.48E-11 | 16.41858 |
| ATP10D  | 0.556416 | 1.470612 | 7.920253 | 7.971488 | 8.36E-12 | 6.52E-11 | 16.41102 |
| TMED9   | 0.299914 | 1.231071 | 9.435063 | 7.96902  | 8.45E-12 | 6.59E-11 | 16.39996 |
| DLG3    | 0.272437 | 1.207847 | 6.160759 | 7.967985 | 8.49E-12 | 6.61E-11 | 16.39532 |
| SRPK2   | 0.285059 | 1.21846  | 6.68038  | 7.966071 | 8.57E-12 | 6.66E-11 | 16.38674 |
| HPN     | -0.5164  | 0.699113 | 9.103418 | -7.96573 | 8.58E-12 | 6.67E-11 | 16.38522 |
| TXNIP   | 0.647602 | 1.566562 | 10.74443 | 7.963563 | 8.67E-12 | 6.73E-11 | 16.3755  |
| GAMT    | -0.48456 | 0.714716 | 7.390633 | -7.96186 | 8.73E-12 | 6.77E-11 | 16.36785 |
| CDK10   | -0.26426 | 0.832628 | 6.742658 | -7.96052 | 8.79E-12 | 6.81E-11 | 16.36187 |
| RASSF2  | 1.007925 | 2.011016 | 5.17038  | 7.960315 | 8.80E-12 | 6.81E-11 | 16.36094 |
| MPI     | -0.37282 | 0.772272 | 6.70557  | -7.95633 | 8.96E-12 | 6.93E-11 | 16.3431  |
| STC2    | -0.39436 | 0.760826 | 5.712658 | -7.95348 | 9.07E-12 | 7.01E-11 | 16.3303  |
| COA4    | -0.27504 | 0.826428 | 8.629241 | -7.94546 | 9.41E-12 | 7.26E-11 | 16.29437 |
| AP1AR   | -0.5521  | 0.682026 | 5.51481  | -7.94435 | 9.46E-12 | 7.29E-11 | 16.28939 |
| BIN1    | -0.46839 | 0.722769 | 8.483038 | -7.94197 | 9.56E-12 | 7.37E-11 | 16.27874 |
| MECR    | -0.33528 | 0.792628 | 6.85038  | -7.94079 | 9.61E-12 | 7.40E-11 | 16.27344 |
| TP53    | 0.367813 | 1.290395 | 5.168861 | 7.937321 | 9.76E-12 | 7.51E-11 | 16.2579  |
| ESRRA   | -0.33165 | 0.794625 | 6.343418 | -7.93441 | 9.89E-12 | 7.60E-11 | 16.24483 |
| CEL     | -0.63275 | 0.644944 | 5.091772 | -7.93335 | 9.94E-12 | 7.63E-11 | 16.2401  |
| NDUFA10 | -0.34377 | 0.787977 | 7.958354 | -7.93222 | 9.99E-12 | 7.67E-11 | 16.23506 |
| UBE2C   | 0.692009 | 1.615532 | 5.734937 | 7.925234 | 1.03E-11 | 7.91E-11 | 16.20374 |
| MCM3    | 0.382181 | 1.30331  | 6.985949 | 7.924615 | 1.03E-11 | 7.92E-11 | 16.20097 |
| MYDGF   | 0.321087 | 1.249271 | 8.213038 | 7.923581 | 1.04E-11 | 7.95E-11 | 16.19634 |
| PSMA6   | 0.444328 | 1.36068  | 10.41582 | 7.921141 | 1.05E-11 | 8.03E-11 | 16.18541 |
| ZNF91   | -0.58325 | 0.66746  | 7.706582 | -7.92025 | 1.06E-11 | 8.06E-11 | 16.18142 |
| NSUN5   | 0.410777 | 1.329402 | 5.742025 | 7.92     | 1.06E-11 | 8.06E-11 | 16.1803  |
| NETO2   | 0.361271 | 1.284557 | 4.307215 | 7.91667  | 1.07E-11 | 8.17E-11 | 16.16538 |
| PNMAL1  | 0.775514 | 1.7118   | 6.430253 | 7.91197  | 1.10E-11 | 8.34E-11 | 16.14433 |
| ACOT7   | -0.88891 | 0.540023 | 8.886076 | -7.90891 | 1.11E-11 | 8.45E-11 | 16.13061 |
| UQCRC2  | -0.28239 | 0.822227 | 9.98443  | -7.90704 | 1.12E-11 | 8.52E-11 | 16.12225 |
| CA2     | -0.56293 | 0.676925 | 11.26203 | -7.90319 | 1.14E-11 | 8.66E-11 | 16.10502 |
| PPP4R1  | 0.398979 | 1.318574 | 8.012532 | 7.89994  | 1.16E-11 | 8.78E-11 | 16.09046 |
| ALDH9A1 | -0.41649 | 0.749246 | 11.01494 | -7.89935 | 1.16E-11 | 8.80E-11 | 16.0878  |
| CCNA2   | 0.335599 | 1.261902 | 4.416709 | 7.888772 | 1.22E-11 | 9.22E-11 | 16.04045 |
| LOXL1   | 1.070145 | 2.099644 | 5.823544 | 7.888609 | 1.22E-11 | 9.22E-11 | 16.03972 |
| DCAF8   | -0.25767 | 0.836439 | 6.653671 | -7.88636 | 1.23E-11 | 9.30E-11 | 16.02967 |
| EGOT    | -0.78952 | 0.578537 | 6.509114 | -7.88263 | 1.25E-11 | 9.45E-11 | 16.01297 |
| PHF21A  | 0.331667 | 1.258466 | 6.023544 | 7.882252 | 1.25E-11 | 9.46E-11 | 16.01126 |
| CLDN3   | 0.779552 | 1.716598 | 6.919114 | 7.880843 | 1.26E-11 | 9.51E-11 | 16.00496 |
| OGDHL   | -0.53551 | 0.689916 | 9.938481 | -7.87683 | 1.28E-11 | 9.68E-11 | 15.987   |
| FH      | -0.31635 | 0.803099 | 7.54481  | -7.87558 | 1.29E-11 | 9.73E-11 | 15.9814  |
| MCAM    | 0.445343 | 1.361637 | 6.081899 | 7.87198  | 1.31E-11 | 9.88E-11 | 15.96528 |
| RAPGEF6 | 0.328353 | 1.255579 | 5.277595 | 7.871725 | 1.31E-11 | 9.88E-11 | 15.96414 |
| DNAJC12 | -0.62395 | 0.648894 | 8.470886 | -7.86651 | 1.35E-11 | 1.01E-10 | 15.94078 |

|         |          |          |          |          |          |          |          |
|---------|----------|----------|----------|----------|----------|----------|----------|
| GPX3    | -0.4597  | 0.727139 | 13.53797 | -7.86557 | 1.35E-11 | 1.01E-10 | 15.9366  |
| TPI1    | -0.30119 | 0.811581 | 10.67962 | -7.86495 | 1.36E-11 | 1.02E-10 | 15.93383 |
| SLC27A2 | -0.90702 | 0.533287 | 10.73177 | -7.86479 | 1.36E-11 | 1.02E-10 | 15.9331  |
| SET     | 0.303162 | 1.233846 | 10.4062  | 7.864561 | 1.36E-11 | 1.02E-10 | 15.93208 |
| DYNLL1  | 0.340553 | 1.266242 | 11.68443 | 7.863226 | 1.37E-11 | 1.02E-10 | 15.9261  |
| NDUFS8  | -0.36411 | 0.776948 | 8.697468 | -7.86239 | 1.37E-11 | 1.02E-10 | 15.92237 |
| ARHGEF6 | 0.589572 | 1.5048   | 6.61519  | 7.862366 | 1.37E-11 | 1.02E-10 | 15.92225 |
| SGK1    | -0.87777 | 0.544209 | 10.61747 | -7.86216 | 1.37E-11 | 1.02E-10 | 15.92133 |
| EXT1    | 0.419144 | 1.337134 | 7.202911 | 7.860238 | 1.39E-11 | 1.03E-10 | 15.91273 |
| CYFIP2  | -0.71895 | 0.607541 | 9.006203 | -7.85211 | 1.44E-11 | 1.07E-10 | 15.87638 |
| STK16   | -0.40942 | 0.752926 | 6.745063 | -7.85017 | 1.45E-11 | 1.08E-10 | 15.86768 |
| GLIPR1  | 0.720619 | 1.647889 | 6.407975 | 7.848926 | 1.46E-11 | 1.08E-10 | 15.86211 |
| CAMK2N1 | -0.37793 | 0.76954  | 9.684304 | -7.84765 | 1.47E-11 | 1.09E-10 | 15.85639 |
| CD27    | 0.799262 | 1.740211 | 5.224304 | 7.843997 | 1.49E-11 | 1.11E-10 | 15.84006 |
| SNN     | 0.326719 | 1.254158 | 5.404304 | 7.842001 | 1.50E-11 | 1.11E-10 | 15.83113 |
| NPLOC4  | -0.2852  | 0.820625 | 8.703038 | -7.83463 | 1.56E-11 | 1.15E-10 | 15.79817 |
| MYOM2   | -0.62146 | 0.650015 | 7.396709 | -7.83443 | 1.56E-11 | 1.15E-10 | 15.79728 |
| EC1     | -0.36296 | 0.777565 | 9.183165 | -7.82245 | 1.64E-11 | 1.21E-10 | 15.74366 |
| HAX1    | -0.29829 | 0.813217 | 9.049747 | -7.81957 | 1.67E-11 | 1.23E-10 | 15.73082 |
| FNTA    | 0.348491 | 1.273229 | 8.114051 | 7.817958 | 1.68E-11 | 1.24E-10 | 15.72359 |
| ISOC1   | -0.47629 | 0.718823 | 8.104304 | -7.8173  | 1.68E-11 | 1.24E-10 | 15.72064 |
| CAPN2   | 0.451667 | 1.367619 | 10.78367 | 7.817161 | 1.68E-11 | 1.24E-10 | 15.72002 |
| PRNP    | -0.48493 | 0.71453  | 9.057215 | -7.81352 | 1.71E-11 | 1.26E-10 | 15.70376 |
| MOCS1   | -0.38608 | 0.765206 | 6.423291 | -7.81339 | 1.71E-11 | 1.26E-10 | 15.70316 |
| PHKA2   | -0.27561 | 0.826103 | 6.129873 | -7.80829 | 1.75E-11 | 1.29E-10 | 15.68035 |
| SH3BGR  | -0.37976 | 0.768564 | 6.106582 | -7.80639 | 1.77E-11 | 1.30E-10 | 15.67187 |
| HRH1    | 0.352563 | 1.276827 | 4.935316 | 7.802669 | 1.80E-11 | 1.32E-10 | 15.65522 |
| PRKCDBP | 0.529038 | 1.442967 | 5.873165 | 7.800377 | 1.82E-11 | 1.33E-10 | 15.64498 |
| PLTP    | 1.364025 | 2.574023 | 7.45     | 7.798922 | 1.83E-11 | 1.34E-10 | 15.63847 |
| SPP1    | 0.481153 | 1.395859 | 12.72468 | 7.797837 | 1.84E-11 | 1.34E-10 | 15.63362 |
| SMAGP   | 0.559967 | 1.474236 | 6.741519 | 7.797645 | 1.84E-11 | 1.34E-10 | 15.63276 |
| ACADL   | -0.48682 | 0.713597 | 7.151646 | -7.79512 | 1.86E-11 | 1.36E-10 | 15.62149 |
| MGAT4B  | 0.439934 | 1.356542 | 7.728987 | 7.793773 | 1.87E-11 | 1.37E-10 | 15.61545 |
| QPRT    | -0.71165 | 0.61062  | 9.584684 | -7.79327 | 1.88E-11 | 1.37E-10 | 15.6132  |
| BAG3    | -0.74582 | 0.596327 | 9.253671 | -7.79006 | 1.90E-11 | 1.39E-10 | 15.59886 |
| SLC26A2 | 0.577635 | 1.492401 | 5.357595 | 7.786773 | 1.93E-11 | 1.41E-10 | 15.58417 |
| ENAH    | 0.395356 | 1.315267 | 6.177975 | 7.78603  | 1.94E-11 | 1.41E-10 | 15.58084 |
| TFPI2   | 1.341627 | 2.53437  | 5.614557 | 7.781649 | 1.98E-11 | 1.44E-10 | 15.56127 |
| AASS    | -0.54627 | 0.684788 | 6.100506 | -7.78022 | 1.99E-11 | 1.44E-10 | 15.55487 |
| MRPS2   | -0.37016 | 0.773698 | 7.271899 | -7.77974 | 2.00E-11 | 1.45E-10 | 15.55275 |
| PDLIM2  | -0.52682 | 0.694084 | 6.834937 | -7.77397 | 2.05E-11 | 1.48E-10 | 15.52695 |
| TP53TG1 | -0.29057 | 0.817577 | 6.701013 | -7.77309 | 2.06E-11 | 1.49E-10 | 15.52303 |
| MAOA    | -0.7287  | 0.603446 | 9.665823 | -7.77253 | 2.06E-11 | 1.49E-10 | 15.5205  |
| GLB1L2  | -0.67092 | 0.628105 | 8.652785 | -7.76884 | 2.10E-11 | 1.51E-10 | 15.50401 |
| CDH6    | 1.001298 | 2.0018   | 7.008481 | 7.767263 | 2.11E-11 | 1.52E-10 | 15.49698 |
| JCHAIN  | 2.301126 | 4.928424 | 7.421013 | 7.766416 | 2.12E-11 | 1.53E-10 | 15.49319 |
| PIGH    | -0.47101 | 0.72146  | 8.266076 | -7.76364 | 2.15E-11 | 1.55E-10 | 15.4808  |

|          |          |          |          |          |          |          |          |
|----------|----------|----------|----------|----------|----------|----------|----------|
| C1orf216 | 0.421054 | 1.338905 | 5.282405 | 7.761848 | 2.16E-11 | 1.56E-10 | 15.47278 |
| TPMT     | -0.39837 | 0.758714 | 7.837722 | -7.76123 | 2.17E-11 | 1.56E-10 | 15.47003 |
| RMND1    | -0.61201 | 0.654285 | 7.168481 | -7.76008 | 2.18E-11 | 1.57E-10 | 15.46491 |
| MRPS34   | -0.29362 | 0.815854 | 7.772785 | -7.7503  | 2.28E-11 | 1.64E-10 | 15.42122 |
| GAL3ST1  | -0.64429 | 0.639808 | 6.861519 | -7.74756 | 2.31E-11 | 1.66E-10 | 15.40896 |
| SDC3     | 0.273676 | 1.208884 | 5.10519  | 7.746354 | 2.32E-11 | 1.66E-10 | 15.40357 |
| SLC31A1  | -0.39449 | 0.76076  | 8.101519 | -7.73562 | 2.44E-11 | 1.75E-10 | 15.35565 |
| OAS3     | 0.647444 | 1.566391 | 5.490886 | 7.732691 | 2.47E-11 | 1.77E-10 | 15.34256 |
| RITA1    | -0.34194 | 0.788978 | 7.026076 | -7.72847 | 2.52E-11 | 1.80E-10 | 15.3237  |
| GTPBP6   | -0.37551 | 0.770834 | 7.765316 | -7.72545 | 2.55E-11 | 1.82E-10 | 15.31021 |
| IFIT2    | 0.732418 | 1.661421 | 6.467468 | 7.721364 | 2.60E-11 | 1.85E-10 | 15.29199 |
| FMO5     | -0.83647 | 0.560013 | 6.894937 | -7.72133 | 2.60E-11 | 1.85E-10 | 15.29186 |
| WDR82    | 0.327661 | 1.254977 | 8.577089 | 7.714389 | 2.68E-11 | 1.91E-10 | 15.26085 |
| KCNK5    | -0.87073 | 0.54687  | 8.26519  | -7.71334 | 2.69E-11 | 1.92E-10 | 15.25617 |
| MTHFD1   | -0.50949 | 0.702473 | 9.678481 | -7.71153 | 2.72E-11 | 1.93E-10 | 15.24809 |
| NKG7     | 0.633972 | 1.551832 | 4.577215 | 7.711163 | 2.72E-11 | 1.93E-10 | 15.24645 |
| XAF1     | 0.907879 | 1.876285 | 5.419241 | 7.709786 | 2.74E-11 | 1.95E-10 | 15.24031 |
| CYB5R4   | 0.438939 | 1.355607 | 6.748354 | 7.696806 | 2.90E-11 | 2.06E-10 | 15.18238 |
| SLC25A13 | -0.48158 | 0.716192 | 7.184051 | -7.69558 | 2.92E-11 | 2.07E-10 | 15.17689 |
| SLAMF8   | 0.613485 | 1.52995  | 4.821266 | 7.6955   | 2.92E-11 | 2.07E-10 | 15.17655 |
| GLUD2    | -0.35622 | 0.781209 | 7.347722 | -7.69435 | 2.94E-11 | 2.08E-10 | 15.17144 |
| CDC25B   | 0.494592 | 1.408922 | 6.645949 | 7.694327 | 2.94E-11 | 2.08E-10 | 15.17132 |
| TRPV1    | -0.32769 | 0.796809 | 5.390506 | -7.68884 | 3.01E-11 | 2.13E-10 | 15.14683 |
| TRAF5    | 0.489407 | 1.403868 | 5.491392 | 7.686367 | 3.04E-11 | 2.15E-10 | 15.1358  |
| ECT2     | 0.448867 | 1.364968 | 4.239241 | 7.683901 | 3.08E-11 | 2.17E-10 | 15.1248  |
| CLEC10A  | 0.952866 | 1.935714 | 5.076076 | 7.681898 | 3.11E-11 | 2.19E-10 | 15.11587 |
| TBC1D2B  | 0.706891 | 1.632282 | 7.163544 | 7.680435 | 3.13E-11 | 2.20E-10 | 15.10934 |
| CD38     | 0.912213 | 1.881931 | 5.859747 | 7.675495 | 3.20E-11 | 2.25E-10 | 15.0873  |
| PTTG1    | 0.644868 | 1.563596 | 7.57481  | 7.672738 | 3.24E-11 | 2.28E-10 | 15.07501 |
| BTN2A1   | 0.255599 | 1.193832 | 7.003291 | 7.67026  | 3.27E-11 | 2.30E-10 | 15.06396 |
| RAC1     | 0.256028 | 1.194186 | 11.14456 | 7.668965 | 3.29E-11 | 2.31E-10 | 15.05818 |
| MAP2K3   | -0.41859 | 0.748155 | 7.819494 | -7.65943 | 3.44E-11 | 2.41E-10 | 15.01565 |
| SLC28A1  | -0.5041  | 0.705098 | 7.017468 | -7.6587  | 3.45E-11 | 2.42E-10 | 15.01242 |
| SLC17A5  | -0.53843 | 0.688519 | 8.262911 | -7.65762 | 3.47E-11 | 2.43E-10 | 15.00758 |
| IGHV4-28 | 2.193498 | 4.574132 | 4.798228 | 7.654012 | 3.52E-11 | 2.47E-10 | 14.99151 |
| BIRC3    | 0.938103 | 1.916007 | 5.020127 | 7.652669 | 3.55E-11 | 2.48E-10 | 14.98552 |
| PRKCA    | -0.23666 | 0.848708 | 5.79962  | -7.64646 | 3.65E-11 | 2.55E-10 | 14.95782 |
| SIGIRR   | -0.67877 | 0.624696 | 8.973418 | -7.64423 | 3.68E-11 | 2.57E-10 | 14.94792 |
| FNBP1    | 0.409308 | 1.328049 | 6.420759 | 7.641905 | 3.72E-11 | 2.60E-10 | 14.93754 |
| GCLC     | -0.55044 | 0.682811 | 7.912025 | -7.64184 | 3.72E-11 | 2.60E-10 | 14.93725 |
| HTR2B    | 1.044097 | 2.062076 | 4.69962  | 7.640329 | 3.75E-11 | 2.61E-10 | 14.93051 |
| GALK2    | -0.40842 | 0.753449 | 6.564177 | -7.63643 | 3.82E-11 | 2.65E-10 | 14.91315 |
| SMTN     | -0.33366 | 0.793519 | 6.056709 | -7.63428 | 3.85E-11 | 2.68E-10 | 14.90357 |
| QSOX1    | 0.347516 | 1.272368 | 6.928861 | 7.633876 | 3.86E-11 | 2.68E-10 | 14.90175 |
| CLCN5    | -0.58802 | 0.665254 | 7.917848 | -7.63268 | 3.88E-11 | 2.69E-10 | 14.89644 |
| PRDX3    | -0.28775 | 0.819177 | 11.39089 | -7.63008 | 3.93E-11 | 2.72E-10 | 14.88483 |
| AKR7A2   | -0.49843 | 0.707879 | 9.988101 | -7.62493 | 4.02E-11 | 2.79E-10 | 14.86188 |

|          |          |          |          |          |          |          |          |
|----------|----------|----------|----------|----------|----------|----------|----------|
| FYN      | -0.39057 | 0.76283  | 6.757722 | -7.62385 | 4.04E-11 | 2.80E-10 | 14.85706 |
| ERAL1    | -0.30343 | 0.810322 | 6.506076 | -7.62269 | 4.06E-11 | 2.81E-10 | 14.85189 |
| DDX10    | -0.65301 | 0.635952 | 8.802658 | -7.61978 | 4.11E-11 | 2.84E-10 | 14.83894 |
| ADCY9    | -0.31303 | 0.804949 | 7.069241 | -7.61882 | 4.13E-11 | 2.85E-10 | 14.83464 |
| MRPL34   | -0.40632 | 0.754543 | 8.911139 | -7.61751 | 4.16E-11 | 2.87E-10 | 14.82885 |
| PSMB7    | -0.22947 | 0.85295  | 10.48089 | -7.61678 | 4.17E-11 | 2.88E-10 | 14.82559 |
| LCN2     | 1.469532 | 2.769321 | 5.941899 | 7.615942 | 4.19E-11 | 2.88E-10 | 14.82184 |
| DNASE1L1 | -0.33327 | 0.793733 | 7.617089 | -7.61002 | 4.30E-11 | 2.96E-10 | 14.79547 |
| CASP6    | 0.38668  | 1.307381 | 6.858481 | 7.609774 | 4.30E-11 | 2.96E-10 | 14.79436 |
| FAM208B  | 0.34307  | 1.268453 | 5.994177 | 7.60901  | 4.32E-11 | 2.97E-10 | 14.79096 |
| MPST     | -0.39356 | 0.761247 | 8.348861 | -7.60863 | 4.33E-11 | 2.97E-10 | 14.78928 |
| CD14     | 1.030876 | 2.043265 | 7.658228 | 7.60667  | 4.36E-11 | 3.00E-10 | 14.78054 |
| MCM5     | 0.373123 | 1.295153 | 5.244557 | 7.603104 | 4.44E-11 | 3.04E-10 | 14.76466 |
| THBS2    | 1.177437 | 2.261747 | 7.073797 | 7.596353 | 4.57E-11 | 3.13E-10 | 14.73459 |
| MSMO1    | -0.49493 | 0.709594 | 9.023038 | -7.59207 | 4.66E-11 | 3.19E-10 | 14.71553 |
| PRKCD    | -0.44213 | 0.736048 | 6.256835 | -7.59126 | 4.68E-11 | 3.20E-10 | 14.71119 |
| MLLT3    | 0.37749  | 1.29908  | 5.607468 | 7.589191 | 4.72E-11 | 3.23E-10 | 14.7027  |
| BOLA1    | -0.31588 | 0.803363 | 6.525443 | -7.58298 | 4.86E-11 | 3.32E-10 | 14.67506 |
| NRP1     | 0.762075 | 1.695928 | 6.988987 | 7.582286 | 4.87E-11 | 3.32E-10 | 14.67196 |
| DTL      | 0.326482 | 1.253952 | 3.858987 | 7.579928 | 4.92E-11 | 3.36E-10 | 14.66146 |
| ACSM5    | -0.62055 | 0.650424 | 7.297089 | -7.57955 | 4.93E-11 | 3.36E-10 | 14.6598  |
| SPINT2   | 0.315889 | 1.244779 | 9.901519 | 7.577016 | 4.99E-11 | 3.40E-10 | 14.6485  |
| CDC7     | 0.478788 | 1.393572 | 4.5      | 7.576368 | 5.00E-11 | 3.40E-10 | 14.64561 |
| EXTL1    | -0.2781  | 0.824675 | 4.75557  | -7.57517 | 5.03E-11 | 3.42E-10 | 14.64028 |
| SERPINE2 | 0.96197  | 1.947968 | 9.656835 | 7.571646 | 5.11E-11 | 3.47E-10 | 14.6246  |
| NPR3     | -0.82385 | 0.564933 | 9.104557 | -7.56931 | 5.17E-11 | 3.51E-10 | 14.6142  |
| NUDT6    | -0.53191 | 0.691638 | 6.759114 | -7.56695 | 5.22E-11 | 3.54E-10 | 14.60371 |
| PLK2     | 0.968399 | 1.956668 | 4.934304 | 7.565181 | 5.26E-11 | 3.57E-10 | 14.59582 |
| ACSS3    | -0.42653 | 0.74405  | 7.639873 | -7.56344 | 5.31E-11 | 3.59E-10 | 14.58808 |
| IFT52    | 0.305665 | 1.235989 | 7.888987 | 7.560166 | 5.38E-11 | 3.64E-10 | 14.57351 |
| NCALD    | -0.50163 | 0.706306 | 6.797848 | -7.55769 | 5.44E-11 | 3.68E-10 | 14.56251 |
| AHR      | 0.504763 | 1.41889  | 6.610633 | 7.556565 | 5.47E-11 | 3.70E-10 | 14.55749 |
| TRIM21   | 0.337022 | 1.263147 | 6.598608 | 7.555901 | 5.49E-11 | 3.70E-10 | 14.55453 |
| RUNX3    | 0.469065 | 1.384212 | 4.702025 | 7.552431 | 5.58E-11 | 3.76E-10 | 14.5391  |
| MAGI2    | -0.35127 | 0.783893 | 5.216962 | -7.55067 | 5.62E-11 | 3.79E-10 | 14.53127 |
| FNDC3B   | 0.55139  | 1.465497 | 7.689241 | 7.550391 | 5.63E-11 | 3.79E-10 | 14.53002 |
| DOK5     | 0.512681 | 1.426699 | 6.69481  | 7.55034  | 5.63E-11 | 3.79E-10 | 14.52979 |
| C1GALT1C | 0.41166  | 1.330216 | 7.638481 | 7.548002 | 5.69E-11 | 3.82E-10 | 14.51939 |
| KPTN     | -0.31895 | 0.801655 | 6.313291 | -7.54623 | 5.73E-11 | 3.85E-10 | 14.51152 |
| HNF1A    | -0.4074  | 0.753982 | 6.408734 | -7.54546 | 5.75E-11 | 3.86E-10 | 14.50807 |
| TMEM254  | -0.26604 | 0.831599 | 5.114304 | -7.54235 | 5.84E-11 | 3.91E-10 | 14.49425 |
| NDUFAB1  | -0.27057 | 0.828994 | 11.18785 | -7.54078 | 5.88E-11 | 3.94E-10 | 14.48729 |
| VIL1     | -0.89566 | 0.537502 | 7.293038 | -7.53939 | 5.91E-11 | 3.96E-10 | 14.48107 |
| SEC61G   | 0.369177 | 1.291615 | 9.60443  | 7.538669 | 5.93E-11 | 3.97E-10 | 14.47788 |
| MAP4K2   | -0.34097 | 0.789511 | 5.021266 | -7.53779 | 5.96E-11 | 3.98E-10 | 14.47397 |
| TRMT61B  | -0.47899 | 0.717479 | 7.567089 | -7.53608 | 6.00E-11 | 4.01E-10 | 14.46636 |
| GDPD3    | -0.99838 | 0.500562 | 7.678608 | -7.53444 | 6.05E-11 | 4.03E-10 | 14.45905 |



|          |          |          |          |          |          |          |          |
|----------|----------|----------|----------|----------|----------|----------|----------|
| CYP2B6   | -0.59178 | 0.663524 | 5.723671 | -7.53442 | 6.05E-11 | 4.03E-10 | 14.45899 |
| INSR     | -0.42607 | 0.744288 | 7.543544 | -7.53372 | 6.07E-11 | 4.04E-10 | 14.45585 |
| ATP5SL   | -0.23103 | 0.852024 | 8.752405 | -7.53163 | 6.12E-11 | 4.08E-10 | 14.44658 |
| ZNF331   | -0.79228 | 0.577431 | 6.68557  | -7.52788 | 6.23E-11 | 4.14E-10 | 14.42991 |
| WARS     | 0.403505 | 1.322717 | 8.468987 | 7.525319 | 6.30E-11 | 4.19E-10 | 14.41852 |
| BCL2L13  | -0.32081 | 0.80062  | 7.623165 | -7.52504 | 6.31E-11 | 4.19E-10 | 14.41729 |
| NPY1R    | 1.292227 | 2.449057 | 8.175443 | 7.524554 | 6.32E-11 | 4.20E-10 | 14.41511 |
| DDB2     | 0.43386  | 1.350843 | 5.759494 | 7.52347  | 6.35E-11 | 4.21E-10 | 14.41029 |
| BLVRA    | 0.246397 | 1.186241 | 8.815316 | 7.518198 | 6.51E-11 | 4.31E-10 | 14.38686 |
| PNMA2    | 0.503202 | 1.417355 | 5.370633 | 7.515189 | 6.60E-11 | 4.37E-10 | 14.37348 |
| FAM102A  | -0.41143 | 0.751878 | 7.198354 | -7.51447 | 6.62E-11 | 4.38E-10 | 14.37029 |
| ASNS     | 0.648735 | 1.567793 | 5.423165 | 7.513881 | 6.63E-11 | 4.39E-10 | 14.36767 |
| SP140L   | 0.616568 | 1.533223 | 5.40038  | 7.51324  | 6.65E-11 | 4.39E-10 | 14.36481 |
| REG1A    | 1.951706 | 3.868317 | 5.821139 | 7.510929 | 6.72E-11 | 4.44E-10 | 14.35454 |
| BST1     | -0.55935 | 0.678606 | 5.977215 | -7.51082 | 6.73E-11 | 4.44E-10 | 14.35404 |
| GUCY1B3  | 0.696034 | 1.620045 | 6.176835 | 7.510686 | 6.73E-11 | 4.44E-10 | 14.35346 |
| CST7     | 0.665211 | 1.5858   | 6.094177 | 7.506966 | 6.84E-11 | 4.51E-10 | 14.33693 |
| RBM7     | 0.413768 | 1.332161 | 7.362405 | 7.505699 | 6.88E-11 | 4.53E-10 | 14.3313  |
| FRYL     | 0.329881 | 1.25691  | 6.46519  | 7.505088 | 6.90E-11 | 4.54E-10 | 14.32859 |
| EOGT     | 0.381568 | 1.302757 | 4.297215 | 7.504863 | 6.91E-11 | 4.54E-10 | 14.32758 |
| CAPN1    | 0.340823 | 1.266479 | 6.582152 | 7.496741 | 7.17E-11 | 4.70E-10 | 14.29149 |
| CD300A   | 0.521126 | 1.435075 | 4.927468 | 7.495417 | 7.21E-11 | 4.73E-10 | 14.28561 |
| UBE2M    | -0.45565 | 0.72918  | 7.555316 | -7.49173 | 7.33E-11 | 4.80E-10 | 14.26921 |
| MAN1B1   | 0.267161 | 1.203437 | 6.927468 | 7.487391 | 7.48E-11 | 4.89E-10 | 14.24995 |
| CDC14B   | -0.23692 | 0.848553 | 6.59038  | -7.48725 | 7.48E-11 | 4.89E-10 | 14.24933 |
| CTNNBIP1 | -0.31629 | 0.803132 | 7.781139 | -7.48388 | 7.60E-11 | 4.97E-10 | 14.23435 |
| SEC22A   | 0.279875 | 1.21409  | 4.945823 | 7.483701 | 7.60E-11 | 4.97E-10 | 14.23357 |
| CHST8    | -0.30178 | 0.811252 | 5.51481  | -7.48337 | 7.61E-11 | 4.97E-10 | 14.23209 |
| RRM2     | 0.913702 | 1.883874 | 4.746456 | 7.482141 | 7.66E-11 | 4.99E-10 | 14.22663 |
| DENND5A  | 0.325935 | 1.253477 | 7.815063 | 7.479357 | 7.75E-11 | 5.05E-10 | 14.21427 |
| LBR      | 0.49747  | 1.411736 | 8.452152 | 7.479052 | 7.76E-11 | 5.06E-10 | 14.21291 |
| PLEKHO1  | 0.716258 | 1.642915 | 5.333544 | 7.478336 | 7.79E-11 | 5.07E-10 | 14.20974 |
| TUFM     | -0.25171 | 0.839899 | 9.140506 | -7.47704 | 7.83E-11 | 5.09E-10 | 14.20397 |
| PNPLA3   | -0.64956 | 0.637475 | 6.086709 | -7.47034 | 8.07E-11 | 5.25E-10 | 14.17422 |
| C2       | 0.841588 | 1.792021 | 6.64481  | 7.468935 | 8.12E-11 | 5.28E-10 | 14.16799 |
| FKBP11   | 1.015626 | 2.02178  | 7.504684 | 7.46311  | 8.34E-11 | 5.41E-10 | 14.14212 |
| VDR      | -0.53483 | 0.690241 | 7.142025 | -7.45829 | 8.52E-11 | 5.53E-10 | 14.12074 |
| TMEM258  | 0.351924 | 1.276261 | 10.53266 | 7.457764 | 8.54E-11 | 5.53E-10 | 14.11839 |
| MET      | 0.430784 | 1.347966 | 7.528861 | 7.457695 | 8.55E-11 | 5.53E-10 | 14.11809 |
| FZD6     | 0.528597 | 1.442526 | 7.054937 | 7.45764  | 8.55E-11 | 5.53E-10 | 14.11784 |
| MDK      | 0.460935 | 1.376434 | 5.646456 | 7.447291 | 8.96E-11 | 5.79E-10 | 14.07191 |
| SLC3A2   | -0.63039 | 0.646002 | 9.426456 | -7.44599 | 9.01E-11 | 5.82E-10 | 14.06614 |
| PRKD2    | 0.282404 | 1.21622  | 6.912532 | 7.443724 | 9.10E-11 | 5.87E-10 | 14.05607 |
| TUBB6    | 0.813412 | 1.757363 | 7.291519 | 7.438127 | 9.33E-11 | 6.02E-10 | 14.03124 |
| SUB1     | 0.276831 | 1.211531 | 9.597595 | 7.432864 | 9.56E-11 | 6.16E-10 | 14.00789 |
| KLC1     | 0.325066 | 1.252722 | 5.49557  | 7.432333 | 9.58E-11 | 6.17E-10 | 14.00553 |
| DLST     | -0.5775  | 0.670122 | 8.982025 | -7.4308  | 9.65E-11 | 6.21E-10 | 13.99874 |

|         |          |          |          |          |          |          |          |
|---------|----------|----------|----------|----------|----------|----------|----------|
| RAP2B   | 0.397497 | 1.31722  | 4.874304 | 7.429426 | 9.71E-11 | 6.24E-10 | 13.99264 |
| MALT1   | 0.541779 | 1.455766 | 6.225443 | 7.427568 | 9.79E-11 | 6.28E-10 | 13.98439 |
| PCCB    | -0.45426 | 0.729883 | 9.16481  | -7.42754 | 9.79E-11 | 6.28E-10 | 13.98426 |
| CRABP1  | -0.47647 | 0.718735 | 5.405316 | -7.42678 | 9.82E-11 | 6.30E-10 | 13.98091 |
| POLR2I  | -0.29383 | 0.815731 | 9.262911 | -7.42382 | 9.95E-11 | 6.38E-10 | 13.96776 |
| ELF1    | 0.35525  | 1.279208 | 7.47557  | 7.423175 | 9.98E-11 | 6.39E-10 | 13.96491 |
| FBXO9   | -0.25688 | 0.836893 | 8.122911 | -7.4197  | 1.01E-10 | 6.49E-10 | 13.94952 |
| ST3GAL1 | -0.60147 | 0.659082 | 6.908101 | -7.41563 | 1.03E-10 | 6.60E-10 | 13.93144 |
| MAST2   | -0.26008 | 0.835042 | 6.30962  | -7.41344 | 1.04E-10 | 6.67E-10 | 13.92174 |
| TTF1    | 0.290303 | 1.222897 | 5.951266 | 7.413048 | 1.04E-10 | 6.67E-10 | 13.92    |
| NROB2   | -0.56829 | 0.674414 | 6.498481 | -7.41036 | 1.06E-10 | 6.75E-10 | 13.90809 |
| TRIB3   | 0.292971 | 1.225161 | 5.786076 | 7.406276 | 1.08E-10 | 6.87E-10 | 13.88997 |
| NPDC1   | 0.575804 | 1.490508 | 5.879873 | 7.405447 | 1.08E-10 | 6.89E-10 | 13.8863  |
| CHTOP   | 0.272484 | 1.207885 | 7.710127 | 7.4042   | 1.09E-10 | 6.92E-10 | 13.88077 |
| NR4A1   | -1.10848 | 0.463781 | 6.236962 | -7.40264 | 1.09E-10 | 6.97E-10 | 13.87385 |
| SLC38A3 | -0.43121 | 0.741642 | 5.538354 | -7.40047 | 1.11E-10 | 7.03E-10 | 13.86422 |
| KIF20A  | 0.40697  | 1.325898 | 4.34     | 7.398934 | 1.11E-10 | 7.07E-10 | 13.85743 |
| CD151   | 0.542958 | 1.456957 | 7.803544 | 7.397571 | 1.12E-10 | 7.11E-10 | 13.85138 |
| BST2    | 0.947879 | 1.929034 | 7.475949 | 7.395353 | 1.13E-10 | 7.18E-10 | 13.84155 |
| NDUFAF1 | -0.3429  | 0.788456 | 9.286329 | -7.38946 | 1.16E-10 | 7.36E-10 | 13.81544 |
| CD86    | 0.431047 | 1.348212 | 4.558101 | 7.38638  | 1.18E-10 | 7.46E-10 | 13.80179 |
| EXT2    | 0.260942 | 1.198261 | 7.651392 | 7.38557  | 1.18E-10 | 7.48E-10 | 13.7982  |
| TWF2    | 0.387372 | 1.308008 | 6.718987 | 7.385369 | 1.18E-10 | 7.48E-10 | 13.79731 |
| PFKL    | -0.27738 | 0.825085 | 8.05     | -7.38518 | 1.18E-10 | 7.48E-10 | 13.79645 |
| TMEM45A | 0.601377 | 1.517164 | 4.533165 | 7.384725 | 1.19E-10 | 7.49E-10 | 13.79445 |
| PGPEP1  | -0.48181 | 0.716081 | 7.835696 | -7.38119 | 1.21E-10 | 7.61E-10 | 13.7788  |
| NDUFC1  | -0.29158 | 0.817006 | 10.58342 | -7.38095 | 1.21E-10 | 7.61E-10 | 13.77771 |
| CTBP2   | 0.336186 | 1.262415 | 7.341519 | 7.380557 | 1.21E-10 | 7.62E-10 | 13.77599 |
| ALDH5A1 | -0.46347 | 0.725239 | 6.828354 | -7.37789 | 1.22E-10 | 7.70E-10 | 13.76415 |
| MTCH2   | -0.33165 | 0.794629 | 9.881899 | -7.37754 | 1.23E-10 | 7.71E-10 | 13.76261 |
| TRIM37  | 0.323709 | 1.251544 | 7.578481 | 7.375211 | 1.24E-10 | 7.79E-10 | 13.7523  |
| IL13RA1 | 0.384137 | 1.305079 | 7.11481  | 7.369446 | 1.27E-10 | 7.98E-10 | 13.72676 |
| VTCN1   | 0.887661 | 1.850175 | 6.561013 | 7.368287 | 1.28E-10 | 8.02E-10 | 13.72163 |
| CYP1B1  | 0.78193  | 1.71943  | 6.620759 | 7.368186 | 1.28E-10 | 8.02E-10 | 13.72118 |
| PVRIG   | 0.661653 | 1.581895 | 5.59443  | 7.364951 | 1.30E-10 | 8.13E-10 | 13.70685 |
| FAM49A  | 0.419137 | 1.337127 | 4.13443  | 7.360903 | 1.32E-10 | 8.27E-10 | 13.68893 |
| RPL3    | 0.447879 | 1.364033 | 11.56709 | 7.359449 | 1.33E-10 | 8.32E-10 | 13.68249 |
| TXN     | -0.33337 | 0.793679 | 11.49987 | -7.35878 | 1.33E-10 | 8.34E-10 | 13.67955 |
| CISH    | -0.70604 | 0.613    | 8.280506 | -7.35847 | 1.34E-10 | 8.34E-10 | 13.67816 |
| SGCE    | 0.431818 | 1.348933 | 8.17038  | 7.353097 | 1.37E-10 | 8.54E-10 | 13.65436 |
| DEFB1   | -0.69132 | 0.619288 | 12.03557 | -7.35263 | 1.37E-10 | 8.55E-10 | 13.65228 |
| GADD45B | -1.25272 | 0.419656 | 8.25519  | -7.35061 | 1.38E-10 | 8.63E-10 | 13.64338 |
| ARL6IP4 | -0.29065 | 0.817536 | 8.807722 | -7.34841 | 1.40E-10 | 8.70E-10 | 13.63364 |
| NDUFS7  | -0.32661 | 0.797406 | 9.271392 | -7.34821 | 1.40E-10 | 8.71E-10 | 13.63273 |
| ZNF227  | 0.374401 | 1.296301 | 4.779873 | 7.348058 | 1.40E-10 | 8.71E-10 | 13.63206 |
| IGKV4-1 | 1.74164  | 3.344152 | 6.528608 | 7.347549 | 1.40E-10 | 8.72E-10 | 13.6298  |
| PER1    | -0.55495 | 0.680679 | 7.482532 | -7.34612 | 1.41E-10 | 8.77E-10 | 13.62349 |

|          |          |          |          |          |          |          |          |
|----------|----------|----------|----------|----------|----------|----------|----------|
| FLI1     | 0.396456 | 1.31627  | 4.484304 | 7.344996 | 1.42E-10 | 8.81E-10 | 13.6185  |
| PRC1     | 0.517128 | 1.431103 | 4.519494 | 7.336573 | 1.47E-10 | 9.14E-10 | 13.58122 |
| IGHV3-21 | 2.020613 | 4.057561 | 4.742532 | 7.33463  | 1.49E-10 | 9.21E-10 | 13.57262 |
| CAPN6    | 0.562121 | 1.476438 | 4.39481  | 7.333373 | 1.49E-10 | 9.26E-10 | 13.56706 |
| TIMM17B  | -0.3007  | 0.811859 | 7.795696 | -7.33145 | 1.51E-10 | 9.33E-10 | 13.55854 |
| KRT81    | -0.33146 | 0.794734 | 5.697848 | -7.33051 | 1.51E-10 | 9.36E-10 | 13.55441 |
| ARHGAP32 | -0.26553 | 0.831895 | 5.685823 | -7.32908 | 1.52E-10 | 9.42E-10 | 13.54805 |
| DDIT3    | -0.47832 | 0.717813 | 7.642152 | -7.32545 | 1.55E-10 | 9.57E-10 | 13.53199 |
| EFHD1    | -0.45319 | 0.730423 | 10.34873 | -7.32393 | 1.56E-10 | 9.62E-10 | 13.52526 |
| ERI3     | -0.42567 | 0.744495 | 6.780886 | -7.32379 | 1.56E-10 | 9.62E-10 | 13.52467 |
| SNRPB    | 0.381976 | 1.303126 | 8.713038 | 7.323417 | 1.56E-10 | 9.63E-10 | 13.52301 |
| CHN1     | 0.357253 | 1.280984 | 6.243797 | 7.321273 | 1.58E-10 | 9.72E-10 | 13.51353 |
| MYLIP    | 0.521001 | 1.434951 | 7.256329 | 7.320117 | 1.59E-10 | 9.76E-10 | 13.50841 |
| AFP      | -0.41597 | 0.749516 | 5.284937 | -7.31981 | 1.59E-10 | 9.77E-10 | 13.50706 |
| FCMR     | 0.426153 | 1.343646 | 5.176709 | 7.313684 | 1.63E-10 | 1.00E-09 | 13.47996 |
| DOK1     | 0.315283 | 1.244256 | 5.521266 | 7.308765 | 1.67E-10 | 1.03E-09 | 13.45821 |
| PIK3CB   | -0.30329 | 0.810404 | 6.342658 | -7.30431 | 1.70E-10 | 1.04E-09 | 13.43849 |
| OGFOD2   | -0.22166 | 0.857578 | 6.780886 | -7.30259 | 1.72E-10 | 1.05E-09 | 13.43091 |
| PTPN12   | 0.347852 | 1.272665 | 5.481392 | 7.297049 | 1.76E-10 | 1.08E-09 | 13.4064  |
| PLCB4    | 0.584868 | 1.499902 | 4.579747 | 7.296936 | 1.76E-10 | 1.08E-09 | 13.4059  |
| CXCL9    | 1.672701 | 3.188109 | 6.16481  | 7.294885 | 1.78E-10 | 1.09E-09 | 13.39683 |
| L2HGDH   | -0.46663 | 0.723654 | 5.495949 | -7.29354 | 1.79E-10 | 1.09E-09 | 13.3909  |
| CPT2     | -0.36231 | 0.777917 | 7.752785 | -7.29306 | 1.79E-10 | 1.09E-09 | 13.38877 |
| ICT1     | -0.36937 | 0.774122 | 7.76962  | -7.29245 | 1.80E-10 | 1.10E-09 | 13.38608 |
| CDH11    | 0.834196 | 1.782864 | 5.929114 | 7.291164 | 1.81E-10 | 1.10E-09 | 13.38039 |
| CD84     | 0.371693 | 1.29387  | 5.094177 | 7.285193 | 1.86E-10 | 1.13E-09 | 13.354   |
| BAG1     | -0.29397 | 0.815657 | 8.453291 | -7.28388 | 1.87E-10 | 1.14E-09 | 13.34822 |
| TPGS2    | 0.345329 | 1.270441 | 6.853165 | 7.281577 | 1.89E-10 | 1.15E-09 | 13.33802 |
| ASB13    | -0.42292 | 0.745911 | 9.358987 | -7.2768  | 1.93E-10 | 1.17E-09 | 13.31692 |
| ADIRF    | -0.93171 | 0.524238 | 9.894937 | -7.27397 | 1.95E-10 | 1.19E-09 | 13.30441 |
| UBA5     | -0.28447 | 0.821045 | 7.662911 | -7.27309 | 1.96E-10 | 1.19E-09 | 13.30053 |
| ITPR3    | 0.331014 | 1.257898 | 5.873924 | 7.271332 | 1.97E-10 | 1.20E-09 | 13.29275 |
| UROS     | -0.40196 | 0.756828 | 6.85557  | -7.26959 | 1.99E-10 | 1.21E-09 | 13.28505 |
| PTP4A2   | 0.274038 | 1.209188 | 8.941646 | 7.268848 | 2.00E-10 | 1.21E-09 | 13.28178 |
| ZMYM6NB  | 0.384796 | 1.305675 | 8.192911 | 7.268157 | 2.00E-10 | 1.21E-09 | 13.27873 |
| ADAMDEC  | 1.134256 | 2.195053 | 4.350759 | 7.2666   | 2.02E-10 | 1.22E-09 | 13.27185 |
| NUAK1    | 0.595784 | 1.511294 | 6.602785 | 7.266237 | 2.02E-10 | 1.22E-09 | 13.27025 |
| NDUFS3   | -0.29013 | 0.817827 | 9.919241 | -7.26517 | 2.03E-10 | 1.23E-09 | 13.26553 |
| DENND2D  | 0.502833 | 1.416993 | 7.345696 | 7.264986 | 2.03E-10 | 1.23E-09 | 13.26472 |
| SSR4     | 0.452648 | 1.36855  | 10.14734 | 7.26272  | 2.05E-10 | 1.24E-09 | 13.25471 |
| GAD1     | -0.30445 | 0.809749 | 4.501519 | -7.26096 | 2.07E-10 | 1.25E-09 | 13.24693 |
| B4GAT1   | -0.38292 | 0.766885 | 8.614177 | -7.26078 | 2.07E-10 | 1.25E-09 | 13.24615 |
| LETMD1   | -0.34008 | 0.789998 | 8.236203 | -7.25889 | 2.09E-10 | 1.26E-09 | 13.23778 |
| CTSZ     | 0.637984 | 1.556153 | 6.032152 | 7.252158 | 2.15E-10 | 1.30E-09 | 13.20807 |
| FUT6     | -0.53757 | 0.688931 | 8.183924 | -7.24582 | 2.21E-10 | 1.33E-09 | 13.1801  |
| SFN      | 0.732391 | 1.661391 | 7.233544 | 7.243408 | 2.24E-10 | 1.34E-09 | 13.16945 |
| TNFRSF17 | 1.087793 | 2.125487 | 4.204177 | 7.243286 | 2.24E-10 | 1.34E-09 | 13.16891 |

|          |          |          |          |          |          |          |          |
|----------|----------|----------|----------|----------|----------|----------|----------|
| EHD4     | 0.406509 | 1.325474 | 7.626329 | 7.242782 | 2.24E-10 | 1.35E-09 | 13.16668 |
| CD40     | 0.351001 | 1.275446 | 5.885316 | 7.24141  | 2.26E-10 | 1.35E-09 | 13.16063 |
| GOT1     | -0.46593 | 0.724005 | 9.924937 | -7.23907 | 2.28E-10 | 1.37E-09 | 13.15031 |
| SAMD9    | 0.365356 | 1.288199 | 4.415443 | 7.23829  | 2.29E-10 | 1.37E-09 | 13.14686 |
| GLUL     | 0.513676 | 1.427683 | 8.395443 | 7.23754  | 2.30E-10 | 1.37E-09 | 13.14355 |
| WBP2     | -0.2904  | 0.817678 | 7.05     | -7.23225 | 2.35E-10 | 1.41E-09 | 13.12018 |
| PHTF1    | 0.286957 | 1.220064 | 4.972911 | 7.23183  | 2.36E-10 | 1.41E-09 | 13.11835 |
| TRPV5    | -0.32601 | 0.797737 | 5.233165 | -7.23135 | 2.36E-10 | 1.41E-09 | 13.11623 |
| GLI3     | -0.39569 | 0.760125 | 7.109494 | -7.22798 | 2.40E-10 | 1.43E-09 | 13.10136 |
| FGF7     | 0.643709 | 1.56234  | 4.482152 | 7.225193 | 2.43E-10 | 1.45E-09 | 13.08906 |
| IQSEC2   | -0.2779  | 0.824792 | 5.758481 | -7.21878 | 2.50E-10 | 1.49E-09 | 13.06078 |
| CASP3    | 0.498393 | 1.412639 | 6.369494 | 7.21741  | 2.51E-10 | 1.50E-09 | 13.05473 |
| BHLHE41  | 0.345856 | 1.270905 | 5.041646 | 7.214905 | 2.54E-10 | 1.51E-09 | 13.04368 |
| BHLHE40  | -0.7085  | 0.611954 | 7.678608 | -7.21312 | 2.56E-10 | 1.52E-09 | 13.0358  |
| APOBEC3B | 0.867997 | 1.825128 | 4.48519  | 7.211387 | 2.58E-10 | 1.53E-09 | 13.02817 |
| DMPK     | -0.38999 | 0.763137 | 5.804051 | -7.21002 | 2.60E-10 | 1.54E-09 | 13.02212 |
| SENP2    | -0.30784 | 0.807851 | 6.952278 | -7.20993 | 2.60E-10 | 1.54E-09 | 13.02172 |
| CAPRIN1  | 0.315323 | 1.24429  | 8.002152 | 7.209476 | 2.61E-10 | 1.54E-09 | 13.01974 |
| PHYHIP   | -0.35994 | 0.779197 | 5.175949 | -7.20819 | 2.62E-10 | 1.55E-09 | 13.01408 |
| COX8A    | -0.2593  | 0.835492 | 11.66038 | -7.20778 | 2.63E-10 | 1.55E-09 | 13.01225 |
| SH3YL1   | -0.59507 | 0.662011 | 10.11316 | -7.20521 | 2.66E-10 | 1.57E-09 | 13.00091 |
| OPTN     | -0.34495 | 0.787337 | 8.818734 | -7.20251 | 2.69E-10 | 1.59E-09 | 12.98902 |
| CDK5     | -0.35854 | 0.779951 | 7.233924 | -7.20109 | 2.71E-10 | 1.60E-09 | 12.98275 |
| BLVRB    | -0.33071 | 0.795144 | 9.066203 | -7.2     | 2.72E-10 | 1.61E-09 | 12.97796 |
| RBBP7    | 0.280995 | 1.215032 | 9.167595 | 7.199808 | 2.72E-10 | 1.61E-09 | 12.97712 |
| PDCD4    | 0.392563 | 1.312723 | 6.472025 | 7.199251 | 2.73E-10 | 1.61E-09 | 12.97466 |
| LY75     | 0.971522 | 1.960908 | 5.184304 | 7.193422 | 2.80E-10 | 1.65E-09 | 12.94896 |
| ASCC3    | 0.337319 | 1.263406 | 5.370253 | 7.190893 | 2.83E-10 | 1.67E-09 | 12.93782 |
| SORBS3   | -0.27475 | 0.826594 | 5.972405 | -7.18515 | 2.91E-10 | 1.71E-09 | 12.91249 |
| NUP37    | 0.362925 | 1.286031 | 7.615949 | 7.173247 | 3.06E-10 | 1.80E-09 | 12.86007 |
| RBFOX2   | 0.332286 | 1.259007 | 7.320759 | 7.172489 | 3.07E-10 | 1.81E-09 | 12.85673 |
| AGFG1    | 0.237391 | 1.178859 | 6.611772 | 7.168843 | 3.13E-10 | 1.83E-09 | 12.84067 |
| UROD     | -0.23038 | 0.852413 | 9.200506 | -7.16783 | 3.14E-10 | 1.84E-09 | 12.83621 |
| CD1D     | 0.424414 | 1.342027 | 3.927722 | 7.157788 | 3.28E-10 | 1.93E-09 | 12.79199 |
| PQLC1    | -0.62469 | 0.648559 | 9.072532 | -7.15525 | 3.32E-10 | 1.95E-09 | 12.7808  |
| NUP93    | 0.302411 | 1.233204 | 7.259367 | 7.155091 | 3.32E-10 | 1.95E-09 | 12.78012 |
| C11orf63 | -0.31972 | 0.801224 | 5.472532 | -7.15444 | 3.33E-10 | 1.95E-09 | 12.77723 |
| VRK2     | 0.309163 | 1.238989 | 7.052405 | 7.154356 | 3.33E-10 | 1.95E-09 | 12.77688 |
| OXA1L    | -0.26638 | 0.831401 | 9.763291 | -7.15241 | 3.36E-10 | 1.97E-09 | 12.76831 |
| OSBPL1A  | -0.39022 | 0.763011 | 8.298734 | -7.14885 | 3.42E-10 | 2.00E-09 | 12.75263 |
| SMYD2    | 0.399776 | 1.319303 | 8.558734 | 7.148331 | 3.43E-10 | 2.00E-09 | 12.75036 |
| PBX3     | 0.41614  | 1.334352 | 5.87557  | 7.146779 | 3.45E-10 | 2.01E-09 | 12.74352 |
| MLST8    | -0.27992 | 0.823636 | 6.61481  | -7.14398 | 3.49E-10 | 2.04E-09 | 12.7312  |
| BLOC1S1  | -0.30406 | 0.809967 | 8.971899 | -7.14336 | 3.50E-10 | 2.04E-09 | 12.72848 |
| CD69     | 0.758445 | 1.691667 | 4.245949 | 7.142368 | 3.52E-10 | 2.05E-09 | 12.72411 |
| ABCC10   | 0.285112 | 1.218505 | 6.588228 | 7.137632 | 3.59E-10 | 2.09E-09 | 12.70327 |
| SLC5A2   | -0.74327 | 0.597385 | 9.134304 | -7.13271 | 3.67E-10 | 2.13E-09 | 12.6816  |

|           |          |          |          |          |          |          |          |
|-----------|----------|----------|----------|----------|----------|----------|----------|
| SORBS2    | 0.4533   | 1.369169 | 7.696962 | 7.131819 | 3.69E-10 | 2.14E-09 | 12.67769 |
| GPC4      | 0.589269 | 1.504484 | 7.495063 | 7.130003 | 3.72E-10 | 2.16E-09 | 12.66971 |
| ROBO1     | 0.474295 | 1.389239 | 5.645949 | 7.128408 | 3.74E-10 | 2.17E-09 | 12.66269 |
| LRRC16A   | 0.449368 | 1.365442 | 7.623797 | 7.127653 | 3.76E-10 | 2.18E-09 | 12.65937 |
| PSMG1     | -0.39427 | 0.760875 | 8.431392 | -7.122   | 3.85E-10 | 2.23E-09 | 12.63451 |
| TRPV4     | -0.46126 | 0.726353 | 5.637975 | -7.12169 | 3.86E-10 | 2.23E-09 | 12.63315 |
| PFN1      | 0.54191  | 1.455899 | 8.675063 | 7.117959 | 3.92E-10 | 2.27E-09 | 12.61673 |
| TIAM1     | 0.326805 | 1.254233 | 5.004557 | 7.112088 | 4.03E-10 | 2.33E-09 | 12.59092 |
| FANCG     | 0.261713 | 1.198901 | 6.043671 | 7.112038 | 4.03E-10 | 2.33E-09 | 12.5907  |
| NUCB1     | -0.39181 | 0.762175 | 8.153291 | -7.11173 | 4.03E-10 | 2.33E-09 | 12.58935 |
| MRPS22    | -0.20474 | 0.867693 | 8.830127 | -7.10953 | 4.07E-10 | 2.35E-09 | 12.57969 |
| ZNF688    | -0.24457 | 0.844066 | 5.803924 | -7.10731 | 4.11E-10 | 2.37E-09 | 12.56992 |
| TAGLN2    | 0.476219 | 1.391093 | 8.502405 | 7.107042 | 4.12E-10 | 2.37E-09 | 12.56873 |
| IMPA2     | -0.37896 | 0.768992 | 10.76127 | -7.10098 | 4.23E-10 | 2.44E-09 | 12.5421  |
| GNPDA1    | -0.53663 | 0.689381 | 9.056709 | -7.09984 | 4.25E-10 | 2.45E-09 | 12.53709 |
| PRKD3     | 0.302286 | 1.233097 | 5.968228 | 7.09799  | 4.29E-10 | 2.47E-09 | 12.52895 |
| MRPL2     | -0.36984 | 0.773867 | 7.378987 | -7.09165 | 4.41E-10 | 2.53E-09 | 12.5011  |
| IL2RB     | 0.60641  | 1.522466 | 6.282658 | 7.089014 | 4.47E-10 | 2.56E-09 | 12.48951 |
| ST6GAL1   | 0.662095 | 1.582379 | 7.252658 | 7.087756 | 4.49E-10 | 2.58E-09 | 12.48398 |
| RFNG      | -0.32871 | 0.796249 | 6.70443  | -7.08743 | 4.50E-10 | 2.58E-09 | 12.48256 |
| FKBP3     | 0.362233 | 1.285414 | 7.795443 | 7.086164 | 4.52E-10 | 2.59E-09 | 12.47699 |
| COPZ2     | -0.38404 | 0.766286 | 7.593924 | -7.08394 | 4.57E-10 | 2.61E-09 | 12.46722 |
| CHP2      | -0.94218 | 0.520446 | 6.370127 | -7.0832  | 4.58E-10 | 2.62E-09 | 12.46395 |
| FAM96B    | -0.26685 | 0.831132 | 9.621139 | -7.08107 | 4.63E-10 | 2.64E-09 | 12.4546  |
| HPCAL1    | -0.34462 | 0.787517 | 7.992785 | -7.07822 | 4.69E-10 | 2.68E-09 | 12.44208 |
| PSMB6     | -0.24457 | 0.844066 | 9.323924 | -7.07791 | 4.69E-10 | 2.68E-09 | 12.44075 |
| NUP214    | 0.285665 | 1.218972 | 6.140633 | 7.077701 | 4.70E-10 | 2.68E-09 | 12.43982 |
| TCEB3-AS1 | -0.37988 | 0.768501 | 6.463924 | -7.07439 | 4.77E-10 | 2.72E-09 | 12.42528 |
| GM2A      | 0.292174 | 1.224484 | 6.839873 | 7.072834 | 4.80E-10 | 2.73E-09 | 12.41844 |
| POMGNT1   | -0.30632 | 0.8087   | 6.102911 | -7.07126 | 4.83E-10 | 2.75E-09 | 12.41155 |
| HACD1     | 0.484427 | 1.39903  | 5.169747 | 7.069772 | 4.87E-10 | 2.77E-09 | 12.405   |
| SRI       | 0.335343 | 1.261677 | 8.485949 | 7.068567 | 4.89E-10 | 2.78E-09 | 12.39971 |
| PCYOX1    | -0.68566 | 0.621722 | 8.050759 | -7.06564 | 4.96E-10 | 2.82E-09 | 12.38687 |
| ROCK1     | 0.407846 | 1.326703 | 6.417975 | 7.061465 | 5.05E-10 | 2.87E-09 | 12.36853 |
| ABCB7     | -0.29699 | 0.813949 | 7.560506 | -7.05958 | 5.09E-10 | 2.89E-09 | 12.36025 |
| FAM214B   | -0.28558 | 0.820412 | 6.70962  | -7.05653 | 5.16E-10 | 2.93E-09 | 12.34687 |
| P3H4      | 0.287721 | 1.22071  | 5.326709 | 7.054142 | 5.22E-10 | 2.95E-09 | 12.33639 |
| NFKBIE    | 0.628551 | 1.546011 | 6.137342 | 7.054094 | 5.22E-10 | 2.95E-09 | 12.33618 |
| NDUFA3    | -0.26885 | 0.829979 | 10.75291 | -7.05233 | 5.26E-10 | 2.98E-09 | 12.32846 |
| MMP2      | 0.453498 | 1.369356 | 6.601392 | 7.050521 | 5.30E-10 | 3.00E-09 | 12.3205  |
| ESR1      | -0.19738 | 0.872134 | 5.251899 | -7.04843 | 5.35E-10 | 3.02E-09 | 12.31134 |
| IGLV3-19  | 1.657536 | 3.154773 | 5.521519 | 7.047605 | 5.37E-10 | 3.03E-09 | 12.30771 |
| RPAP3     | 0.322312 | 1.250333 | 5.220506 | 7.046797 | 5.39E-10 | 3.04E-09 | 12.30416 |
| MAST3     | -0.30801 | 0.807755 | 6.321772 | -7.04488 | 5.44E-10 | 3.07E-09 | 12.29577 |
| UPF3B     | 0.308696 | 1.238587 | 5.580253 | 7.044621 | 5.44E-10 | 3.07E-09 | 12.29461 |
| CEP68     | 0.286318 | 1.219523 | 6.010253 | 7.040727 | 5.54E-10 | 3.12E-09 | 12.27753 |
| DDR GK1   | 0.296647 | 1.228286 | 8.028481 | 7.040564 | 5.54E-10 | 3.12E-09 | 12.27682 |

|          |          |          |          |          |          |          |          |
|----------|----------|----------|----------|----------|----------|----------|----------|
| DCTD     | 0.295889 | 1.227642 | 7.943165 | 7.038951 | 5.58E-10 | 3.14E-09 | 12.26974 |
| SDHD     | -0.45133 | 0.731368 | 10.73886 | -7.03791 | 5.61E-10 | 3.15E-09 | 12.26517 |
| NRL      | -0.25648 | 0.837127 | 5.400253 | -7.03226 | 5.75E-10 | 3.23E-09 | 12.24041 |
| CLEC7A   | 0.662984 | 1.583354 | 4.707595 | 7.029984 | 5.81E-10 | 3.26E-09 | 12.23042 |
| CLIC4    | -0.53435 | 0.690471 | 9.741139 | -7.02988 | 5.81E-10 | 3.26E-09 | 12.22997 |
| LGALS2   | -0.76375 | 0.588964 | 10.10684 | -7.02901 | 5.83E-10 | 3.27E-09 | 12.22615 |
| DDN      | -0.48522 | 0.714386 | 7.194051 | -7.02774 | 5.87E-10 | 3.29E-09 | 12.22058 |
| NDUFB7   | -0.35229 | 0.783342 | 10.00089 | -7.0253  | 5.93E-10 | 3.32E-09 | 12.20988 |
| GOSR2    | -0.27866 | 0.824355 | 6.784684 | -7.02527 | 5.93E-10 | 3.32E-09 | 12.20975 |
| RNF19B   | -0.32645 | 0.797497 | 6.813418 | -7.02423 | 5.96E-10 | 3.33E-09 | 12.20519 |
| AFTPH    | -0.30738 | 0.808105 | 9.837468 | -7.01936 | 6.09E-10 | 3.40E-09 | 12.18386 |
| LUC7L3   | 0.39892  | 1.31852  | 7.806203 | 7.018804 | 6.11E-10 | 3.41E-09 | 12.18141 |
| RB1      | 0.275435 | 1.210359 | 5.53962  | 7.016351 | 6.17E-10 | 3.44E-09 | 12.17066 |
| RNF123   | -0.30269 | 0.810737 | 6.745949 | -7.01245 | 6.28E-10 | 3.50E-09 | 12.15356 |
| MGP      | 1.064644 | 2.091654 | 10.3519  | 7.011445 | 6.31E-10 | 3.52E-09 | 12.14916 |
| DROSHA   | 0.287358 | 1.220404 | 7.130253 | 7.009144 | 6.37E-10 | 3.55E-09 | 12.13907 |
| PIBF1    | 0.385382 | 1.306206 | 5.137722 | 7.00819  | 6.40E-10 | 3.56E-09 | 12.13489 |
| CD96     | 0.350283 | 1.274811 | 3.910886 | 7.006227 | 6.46E-10 | 3.59E-09 | 12.12629 |
| TMX1     | 0.467859 | 1.383055 | 7.87     | 7.005788 | 6.47E-10 | 3.59E-09 | 12.12437 |
| HIPK3    | -0.46877 | 0.722581 | 5.41962  | -7.00578 | 6.47E-10 | 3.59E-09 | 12.12432 |
| CPN2     | -0.75939 | 0.590744 | 5.432785 | -7.00164 | 6.59E-10 | 3.66E-09 | 12.10619 |
| CYP2A13  | -0.33517 | 0.79269  | 5.604557 | -6.99932 | 6.66E-10 | 3.69E-09 | 12.09603 |
| THAP7    | -0.28758 | 0.819274 | 6.401392 | -6.99774 | 6.71E-10 | 3.72E-09 | 12.0891  |
| RNF167   | -0.23636 | 0.848882 | 8.091266 | -6.99734 | 6.72E-10 | 3.72E-09 | 12.08735 |
| PITX3    | -0.29646 | 0.81425  | 5.947468 | -6.99672 | 6.74E-10 | 3.73E-09 | 12.08465 |
| MDH2     | -0.26499 | 0.832206 | 9.281266 | -6.99461 | 6.80E-10 | 3.76E-09 | 12.07541 |
| ARHGEF16 | -0.30079 | 0.811807 | 6.666962 | -6.9909  | 6.91E-10 | 3.82E-09 | 12.05917 |
| TMBIM6   | -0.32879 | 0.796202 | 12.09418 | -6.98945 | 6.96E-10 | 3.85E-09 | 12.05279 |
| TRANK1   | 0.400132 | 1.319628 | 5.066709 | 6.98453  | 7.11E-10 | 3.93E-09 | 12.03127 |
| SLC12A9  | -0.26763 | 0.830684 | 6.37038  | -6.98325 | 7.15E-10 | 3.95E-09 | 12.02566 |
| PRPSAP2  | -0.3133  | 0.804799 | 7.531519 | -6.98296 | 7.16E-10 | 3.95E-09 | 12.02438 |
| APOL3    | 0.32247  | 1.25047  | 5.894051 | 6.980588 | 7.24E-10 | 3.99E-09 | 12.01401 |
| IGHV3-23 | 1.699888 | 3.248757 | 5.185949 | 6.979324 | 7.28E-10 | 4.01E-09 | 12.00848 |
| SERPINA4 | -0.56775 | 0.674666 | 5.883924 | -6.97652 | 7.37E-10 | 4.06E-09 | 11.99619 |
| GTF2E1   | 0.358597 | 1.282178 | 7.033924 | 6.976269 | 7.38E-10 | 4.06E-09 | 11.9951  |
| USP3     | 0.349664 | 1.274264 | 7.753671 | 6.975712 | 7.40E-10 | 4.07E-09 | 11.99267 |
| TLR4     | 0.333702 | 1.260243 | 4.594177 | 6.975611 | 7.40E-10 | 4.07E-09 | 11.99223 |
| TP53TG5  | -0.39183 | 0.762162 | 5.739367 | -6.97449 | 7.44E-10 | 4.08E-09 | 11.98732 |
| ADCK3    | -0.38791 | 0.764239 | 7.674051 | -6.9732  | 7.48E-10 | 4.10E-09 | 11.98167 |
| RYK      | 0.246884 | 1.186641 | 6.712911 | 6.971861 | 7.53E-10 | 4.13E-09 | 11.97581 |
| DYNLT1   | 0.273999 | 1.209155 | 10.85076 | 6.971626 | 7.53E-10 | 4.13E-09 | 11.97479 |
| GPR183   | 0.509954 | 1.424005 | 4.643671 | 6.968735 | 7.63E-10 | 4.18E-09 | 11.96214 |
| TMPRSS4  | 0.611845 | 1.528212 | 6.639494 | 6.96846  | 7.64E-10 | 4.18E-09 | 11.96093 |
| PTRF     | 0.310494 | 1.240132 | 6.33557  | 6.96712  | 7.69E-10 | 4.20E-09 | 11.95507 |
| MYB      | 0.332885 | 1.25953  | 4.172532 | 6.96669  | 7.70E-10 | 4.21E-09 | 11.95319 |
| CANT1    | 0.228643 | 1.171732 | 6.758987 | 6.966519 | 7.71E-10 | 4.21E-09 | 11.95244 |
| SERPINB1 | 0.427016 | 1.34445  | 7.357722 | 6.964893 | 7.76E-10 | 4.24E-09 | 11.94533 |

|          |          |          |          |          |          |          |          |
|----------|----------|----------|----------|----------|----------|----------|----------|
| PDK4     | -1.42021 | 0.373658 | 7.785443 | -6.96096 | 7.90E-10 | 4.31E-09 | 11.92812 |
| PCCA     | -0.42248 | 0.746142 | 9.805696 | -6.96052 | 7.91E-10 | 4.31E-09 | 11.92621 |
| CORO1A   | 0.877708 | 1.837453 | 5.736203 | 6.960139 | 7.93E-10 | 4.32E-09 | 11.92453 |
| SAMM50   | -0.39493 | 0.760524 | 9.06481  | -6.95992 | 7.94E-10 | 4.32E-09 | 11.92359 |
| AEBP1    | 0.830626 | 1.778457 | 6.842405 | 6.959715 | 7.94E-10 | 4.32E-09 | 11.92268 |
| CTSO     | 0.410744 | 1.329372 | 7.88962  | 6.959599 | 7.95E-10 | 4.32E-09 | 11.92217 |
| INVS     | -0.39576 | 0.760087 | 6.316203 | -6.95944 | 7.95E-10 | 4.32E-09 | 11.92145 |
| DDX25    | -0.38007 | 0.768403 | 5.506456 | -6.95791 | 8.01E-10 | 4.35E-09 | 11.91476 |
| DDO      | -0.40236 | 0.756617 | 6.128228 | -6.9559  | 8.08E-10 | 4.38E-09 | 11.90597 |
| IK       | 0.271383 | 1.206965 | 9.063797 | 6.955832 | 8.08E-10 | 4.38E-09 | 11.90569 |
| PAPSS1   | 0.390343 | 1.310705 | 8.843924 | 6.951803 | 8.23E-10 | 4.46E-09 | 11.88807 |
| CFH      | 1.00168  | 2.00233  | 6.30038  | 6.951734 | 8.23E-10 | 4.46E-09 | 11.88777 |
| TM7SF3   | -0.45605 | 0.728981 | 6.066456 | -6.95167 | 8.23E-10 | 4.46E-09 | 11.88749 |
| SRPX     | 0.815125 | 1.759451 | 5.066582 | 6.950841 | 8.26E-10 | 4.47E-09 | 11.88386 |
| HDAC1    | 0.38052  | 1.301811 | 7.248734 | 6.948644 | 8.34E-10 | 4.51E-09 | 11.87426 |
| GNG11    | 0.67496  | 1.596553 | 7.936076 | 6.944542 | 8.50E-10 | 4.59E-09 | 11.85632 |
| CDC123   | 0.28247  | 1.216276 | 8.587342 | 6.941833 | 8.60E-10 | 4.64E-09 | 11.84448 |
| LPPR1    | -0.72455 | 0.605188 | 8.747342 | -6.93983 | 8.68E-10 | 4.68E-09 | 11.83574 |
| IFIH1    | 0.714025 | 1.640374 | 5.848481 | 6.938731 | 8.72E-10 | 4.70E-09 | 11.83092 |
| ABHD10   | -0.49409 | 0.710009 | 8.858608 | -6.93799 | 8.75E-10 | 4.71E-09 | 11.82769 |
| NUP62    | 0.330099 | 1.257099 | 5.845063 | 6.937038 | 8.79E-10 | 4.73E-09 | 11.82352 |
| SPATA2L  | -0.60549 | 0.657249 | 7.344684 | -6.93699 | 8.79E-10 | 4.73E-09 | 11.8233  |
| MR1      | 0.264236 | 1.201    | 5.831899 | 6.936873 | 8.79E-10 | 4.73E-09 | 11.8228  |
| RLN2     | 0.343386 | 1.268731 | 4.161266 | 6.930694 | 9.04E-10 | 4.86E-09 | 11.7958  |
| SHARPIN  | -0.23724 | 0.848367 | 6.973291 | -6.93003 | 9.06E-10 | 4.87E-09 | 11.79289 |
| PIK3R3   | 0.294308 | 1.226297 | 5.637722 | 6.928183 | 9.14E-10 | 4.90E-09 | 11.78483 |
| DARS2    | -0.33458 | 0.793016 | 6.947848 | -6.92744 | 9.17E-10 | 4.92E-09 | 11.78158 |
| SEMA4G   | -0.3019  | 0.811185 | 5.772152 | -6.9264  | 9.21E-10 | 4.94E-09 | 11.77702 |
| SHANK2   | -0.3701  | 0.77373  | 6.148228 | -6.92515 | 9.26E-10 | 4.96E-09 | 11.77159 |
| IGLV1-40 | 1.433393 | 2.700811 | 7.325063 | 6.921911 | 9.40E-10 | 5.03E-09 | 11.75743 |
| MANF     | 0.442899 | 1.359333 | 9.285443 | 6.919652 | 9.49E-10 | 5.08E-09 | 11.74756 |
| SHBG     | -0.40362 | 0.755957 | 6.158354 | -6.91871 | 9.53E-10 | 5.10E-09 | 11.74344 |
| TM7SF2   | -0.40211 | 0.756748 | 7.700506 | -6.91588 | 9.65E-10 | 5.16E-09 | 11.73108 |
| CDK1     | 0.403333 | 1.32256  | 4.658481 | 6.915676 | 9.66E-10 | 5.16E-09 | 11.73019 |
| PARK2    | -0.28621 | 0.820052 | 5.105443 | -6.91437 | 9.72E-10 | 5.19E-09 | 11.72449 |
| TNNC1    | -0.56381 | 0.676514 | 4.964051 | -6.91394 | 9.73E-10 | 5.19E-09 | 11.7226  |
| PFKFB2   | -0.49236 | 0.710859 | 6.660633 | -6.90999 | 9.91E-10 | 5.28E-09 | 11.70536 |
| XBP1     | 0.527971 | 1.4419   | 7.889241 | 6.905817 | 1.01E-09 | 5.38E-09 | 11.68715 |
| SAFB2    | -0.2316  | 0.851689 | 7.623038 | -6.90488 | 1.01E-09 | 5.40E-09 | 11.68303 |
| KCNK10   | -0.42657 | 0.744026 | 5.300506 | -6.90462 | 1.01E-09 | 5.40E-09 | 11.68192 |
| ZNHIT1   | -0.29789 | 0.81344  | 9.688608 | -6.89804 | 1.04E-09 | 5.55E-09 | 11.6532  |
| TRHDE    | -0.59372 | 0.662631 | 6.801772 | -6.89799 | 1.04E-09 | 5.55E-09 | 11.65296 |
| BCAS3    | -0.27166 | 0.828366 | 6.88     | -6.8942  | 1.06E-09 | 5.64E-09 | 11.63643 |
| CALU     | 0.244519 | 1.184698 | 7.088228 | 6.893733 | 1.06E-09 | 5.65E-09 | 11.6344  |
| SOD2     | 0.980613 | 1.973303 | 7.998101 | 6.892667 | 1.07E-09 | 5.67E-09 | 11.62975 |
| COL5A1   | 0.313702 | 1.242893 | 4.645823 | 6.889858 | 1.08E-09 | 5.74E-09 | 11.61749 |
| POU2AF1  | 1.328874 | 2.512065 | 4.925316 | 6.888542 | 1.09E-09 | 5.77E-09 | 11.61175 |

|           |          |          |          |          |          |          |          |
|-----------|----------|----------|----------|----------|----------|----------|----------|
| OGDH      | -0.40105 | 0.757308 | 7.38443  | -6.88799 | 1.09E-09 | 5.78E-09 | 11.60932 |
| RPL36     | 0.443603 | 1.359997 | 10.04291 | 6.887933 | 1.09E-09 | 5.78E-09 | 11.60909 |
| MPDZ      | -0.46623 | 0.723853 | 7.85481  | -6.88229 | 1.12E-09 | 5.92E-09 | 11.58448 |
| CCDC90B   | 0.319361 | 1.247778 | 7.401013 | 6.8814   | 1.12E-09 | 5.94E-09 | 11.5806  |
| TNNT2     | -0.56242 | 0.677163 | 5.715063 | -6.88109 | 1.13E-09 | 5.95E-09 | 11.57926 |
| MGAT3     | -0.232   | 0.851452 | 5.215696 | -6.87961 | 1.13E-09 | 5.98E-09 | 11.57277 |
| COPG2IT1  | -0.34451 | 0.787578 | 4.846962 | -6.87803 | 1.14E-09 | 6.02E-09 | 11.56592 |
| MICAL2    | 0.25917  | 1.19679  | 5.2      | 6.87563  | 1.15E-09 | 6.08E-09 | 11.55543 |
| EMD       | -0.29024 | 0.817768 | 7.263544 | -6.87522 | 1.16E-09 | 6.09E-09 | 11.55365 |
| FOSB      | -1.66735 | 0.314831 | 6.051772 | -6.87364 | 1.16E-09 | 6.13E-09 | 11.54673 |
| MS4A1     | 0.82334  | 1.769498 | 4.892405 | 6.872904 | 1.17E-09 | 6.14E-09 | 11.54354 |
| FCN1      | 0.770547 | 1.705916 | 4.95557  | 6.87256  | 1.17E-09 | 6.15E-09 | 11.54205 |
| RHOG      | 0.334776 | 1.261182 | 7.586582 | 6.872478 | 1.17E-09 | 6.15E-09 | 11.54169 |
| TFB2M     | -0.38968 | 0.763297 | 7.914177 | -6.8717  | 1.17E-09 | 6.17E-09 | 11.53828 |
| ADA       | 0.421673 | 1.33948  | 5.29962  | 6.868622 | 1.19E-09 | 6.25E-09 | 11.52487 |
| SLC1A3    | 0.449618 | 1.365679 | 5.506076 | 6.864305 | 1.21E-09 | 6.36E-09 | 11.50606 |
| TAPBP     | 0.298037 | 1.22947  | 6.927975 | 6.862795 | 1.22E-09 | 6.40E-09 | 11.49947 |
| PCTP      | -0.51843 | 0.698133 | 8.189747 | -6.86277 | 1.22E-09 | 6.40E-09 | 11.49938 |
| PTPN6     | 0.412055 | 1.33058  | 5.777342 | 6.860764 | 1.23E-09 | 6.45E-09 | 11.49062 |
| LPGAT1    | 0.509447 | 1.423504 | 5.500633 | 6.860395 | 1.23E-09 | 6.46E-09 | 11.48901 |
| COQ9      | -0.30621 | 0.808762 | 9.657089 | -6.85975 | 1.24E-09 | 6.47E-09 | 11.48619 |
| GLB1      | 0.330962 | 1.257852 | 8.896076 | 6.859526 | 1.24E-09 | 6.47E-09 | 11.48522 |
| CSK       | 0.34946  | 1.274083 | 7.070759 | 6.858095 | 1.25E-09 | 6.51E-09 | 11.47899 |
| TEX30     | -0.33632 | 0.79206  | 6.998861 | -6.85608 | 1.26E-09 | 6.57E-09 | 11.4702  |
| MTRR      | -0.3915  | 0.762336 | 8.093418 | -6.85511 | 1.26E-09 | 6.59E-09 | 11.46599 |
| SLC30A9   | -0.38053 | 0.768153 | 9.254304 | -6.85169 | 1.28E-09 | 6.69E-09 | 11.45108 |
| NELFCD    | -0.29487 | 0.815147 | 8.841392 | -6.85129 | 1.29E-09 | 6.69E-09 | 11.44935 |
| HTR6      | -0.23371 | 0.850446 | 4.749114 | -6.84928 | 1.30E-09 | 6.75E-09 | 11.44058 |
| CCBL1     | -0.31588 | 0.803359 | 6.906962 | -6.84767 | 1.31E-09 | 6.79E-09 | 11.43358 |
| FLRT3     | 0.76307  | 1.697098 | 8.34962  | 6.847052 | 1.31E-09 | 6.81E-09 | 11.43087 |
| TNFAIP2   | 0.450422 | 1.36644  | 6.550759 | 6.845614 | 1.32E-09 | 6.85E-09 | 11.42461 |
| MPP1      | -0.33756 | 0.791377 | 8.575949 | -6.8385  | 1.36E-09 | 7.06E-09 | 11.39362 |
| PGRMC2    | -0.3491  | 0.785071 | 8.317215 | -6.83764 | 1.37E-09 | 7.09E-09 | 11.38987 |
| WDR1      | 0.275863 | 1.210718 | 9.020886 | 6.835459 | 1.38E-09 | 7.15E-09 | 11.38038 |
| UBE2D2    | 0.194302 | 1.14417  | 7.467468 | 6.834947 | 1.38E-09 | 7.16E-09 | 11.37816 |
| PKIG      | -0.25491 | 0.838041 | 8.997215 | -6.83359 | 1.39E-09 | 7.20E-09 | 11.37225 |
| LOC100131 | 0.879895 | 1.840241 | 6.411899 | 6.833202 | 1.39E-09 | 7.21E-09 | 11.37056 |
| LSM14B    | -0.28128 | 0.822858 | 5.369241 | -6.83253 | 1.40E-09 | 7.23E-09 | 11.36764 |
| R3HCC1    | -0.22502 | 0.855583 | 8.16557  | -6.83218 | 1.40E-09 | 7.23E-09 | 11.36613 |
| ZNF468    | 0.32892  | 1.256072 | 5.436962 | 6.827267 | 1.43E-09 | 7.39E-09 | 11.34472 |
| DENR      | 0.339104 | 1.264971 | 8.668608 | 6.827001 | 1.43E-09 | 7.39E-09 | 11.34356 |
| ENDOG     | -0.44044 | 0.736909 | 7.537975 | -6.82675 | 1.43E-09 | 7.40E-09 | 11.34248 |
| ESRRG     | -0.49831 | 0.707934 | 7.992278 | -6.8254  | 1.44E-09 | 7.43E-09 | 11.33659 |
| LAMA5     | 0.351028 | 1.275469 | 7.679241 | 6.824652 | 1.45E-09 | 7.46E-09 | 11.33334 |
| ATP6V1G2  | -0.35736 | 0.780593 | 4.940506 | -6.82273 | 1.46E-09 | 7.51E-09 | 11.32496 |
| CAV1      | 0.675955 | 1.597654 | 6.416709 | 6.815351 | 1.51E-09 | 7.76E-09 | 11.29287 |
| RAB17     | -0.4735  | 0.720213 | 8.711772 | -6.81498 | 1.51E-09 | 7.77E-09 | 11.29124 |



|          |          |          |          |          |          |          |          |
|----------|----------|----------|----------|----------|----------|----------|----------|
| CYP46A1  | -0.44026 | 0.737003 | 6.015443 | -6.81457 | 1.51E-09 | 7.78E-09 | 11.28947 |
| ETFDH    | -0.45068 | 0.731699 | 6.778481 | -6.81195 | 1.53E-09 | 7.86E-09 | 11.27807 |
| APOBEC3F | 0.348426 | 1.27317  | 4.279241 | 6.811929 | 1.53E-09 | 7.86E-09 | 11.27798 |
| MAF      | -0.61319 | 0.65375  | 7.60038  | -6.8085  | 1.55E-09 | 7.97E-09 | 11.26308 |
| ITGA3    | 0.554328 | 1.468485 | 6.671772 | 6.806699 | 1.57E-09 | 8.03E-09 | 11.25523 |
| PLXNA1   | 0.204493 | 1.152281 | 5.657595 | 6.804517 | 1.58E-09 | 8.11E-09 | 11.24574 |
| DDX56    | -0.22298 | 0.856791 | 7.376203 | -6.80007 | 1.61E-09 | 8.26E-09 | 11.22639 |
| RMDN1    | -0.35715 | 0.780707 | 7.491899 | -6.79959 | 1.62E-09 | 8.27E-09 | 11.22431 |
| ATF7IP   | 0.338505 | 1.264445 | 7.076835 | 6.797174 | 1.63E-09 | 8.36E-09 | 11.21381 |
| RNF44    | 0.273333 | 1.208597 | 7.604177 | 6.796888 | 1.64E-09 | 8.36E-09 | 11.21257 |
| MAP3K1   | 0.359236 | 1.282746 | 5.256582 | 6.795645 | 1.64E-09 | 8.40E-09 | 11.20717 |
| GIN51    | 0.466542 | 1.381793 | 5.443797 | 6.793171 | 1.66E-09 | 8.49E-09 | 11.19641 |
| PLEKHO2  | 0.460165 | 1.375699 | 7.324177 | 6.792942 | 1.66E-09 | 8.49E-09 | 11.19542 |
| ZBED5    | 0.366278 | 1.289023 | 8.362785 | 6.792216 | 1.67E-09 | 8.52E-09 | 11.19226 |
| HSD11B2  | -0.6761  | 0.625855 | 9.526709 | -6.78759 | 1.70E-09 | 8.69E-09 | 11.17214 |
| CENPM    | 0.431291 | 1.34844  | 5.071899 | 6.786917 | 1.71E-09 | 8.71E-09 | 11.16923 |
| ZNHIT6   | 0.325797 | 1.253357 | 5.716962 | 6.778095 | 1.78E-09 | 9.05E-09 | 11.1309  |
| COMT     | 0.240066 | 1.181047 | 8.155063 | 6.777346 | 1.78E-09 | 9.07E-09 | 11.12764 |
| CCNG1    | -0.2949  | 0.815128 | 10.96899 | -6.77524 | 1.80E-09 | 9.15E-09 | 11.11848 |
| PTOV1    | -0.34718 | 0.786119 | 8.263671 | -6.77523 | 1.80E-09 | 9.15E-09 | 11.11846 |
| TCEA2    | -0.2998  | 0.812367 | 6.527595 | -6.7751  | 1.80E-09 | 9.15E-09 | 11.1179  |
| CPA3     | 1.398524 | 2.636318 | 5.835063 | 6.774464 | 1.81E-09 | 9.17E-09 | 11.11512 |
| PDXDC1   | -0.25676 | 0.836966 | 8.954051 | -6.77422 | 1.81E-09 | 9.17E-09 | 11.11408 |
| MICB     | 0.531976 | 1.445909 | 4.775696 | 6.773653 | 1.81E-09 | 9.19E-09 | 11.1116  |
| FBRS     | -0.24378 | 0.844529 | 5.621646 | -6.77129 | 1.83E-09 | 9.28E-09 | 11.10132 |
| SGPL1    | 0.230198 | 1.172996 | 6.450506 | 6.770162 | 1.84E-09 | 9.32E-09 | 11.09644 |
| RGN      | -0.78323 | 0.581063 | 8.49     | -6.76915 | 1.85E-09 | 9.36E-09 | 11.09205 |
| FAM49B   | 0.310132 | 1.239821 | 7.099114 | 6.760991 | 1.92E-09 | 9.70E-09 | 11.05661 |
| TXLNA    | 0.312286 | 1.241674 | 6.132405 | 6.756315 | 1.96E-09 | 9.89E-09 | 11.03632 |
| VPS51    | -0.25912 | 0.835599 | 9.127848 | -6.75382 | 1.98E-09 | 1.00E-08 | 11.0255  |
| FIP1L1   | 0.295395 | 1.227221 | 5.617089 | 6.753238 | 1.98E-09 | 1.00E-08 | 11.02296 |
| PRF1     | 0.347115 | 1.272014 | 5.591519 | 6.751387 | 2.00E-09 | 1.01E-08 | 11.01493 |
| CHN2     | -0.42858 | 0.742991 | 6.243797 | -6.74871 | 2.02E-09 | 1.02E-08 | 11.00331 |
| PDCD5    | 0.43307  | 1.350103 | 6.171772 | 6.748702 | 2.02E-09 | 1.02E-08 | 11.00328 |
| ADH5     | -0.36653 | 0.775643 | 10.15646 | -6.74302 | 2.07E-09 | 1.05E-08 | 10.97864 |
| MLXIPL   | -0.42671 | 0.743955 | 6.802405 | -6.74222 | 2.08E-09 | 1.05E-08 | 10.97517 |
| NELL1    | -0.66718 | 0.629736 | 6.25     | -6.73813 | 2.12E-09 | 1.07E-08 | 10.95742 |
| ST6GALNA | 0.336561 | 1.262743 | 5.234937 | 6.736737 | 2.13E-09 | 1.07E-08 | 10.95137 |
| SERPINC1 | -0.54919 | 0.683404 | 4.793418 | -6.73296 | 2.17E-09 | 1.09E-08 | 10.935   |
| FOLR2    | 0.58166  | 1.49657  | 7.389494 | 6.73229  | 2.18E-09 | 1.09E-08 | 10.93209 |
| ORC6     | 0.361733 | 1.284968 | 4.240886 | 6.730304 | 2.19E-09 | 1.10E-08 | 10.92348 |
| TDO2     | 0.768498 | 1.703495 | 4.577975 | 6.729802 | 2.20E-09 | 1.10E-08 | 10.9213  |
| IL32     | 1.226054 | 2.339263 | 7.733671 | 6.728271 | 2.21E-09 | 1.11E-08 | 10.91466 |
| MSH2     | 0.404855 | 1.323956 | 5.447595 | 6.719259 | 2.30E-09 | 1.15E-08 | 10.8756  |
| SMPD1    | -0.39883 | 0.758471 | 7.334051 | -6.71749 | 2.32E-09 | 1.16E-08 | 10.86792 |
| SYK      | 0.363874 | 1.286876 | 5.417215 | 6.715384 | 2.34E-09 | 1.17E-08 | 10.85881 |
| ENTPD7   | 0.34251  | 1.267961 | 5.563291 | 6.714426 | 2.35E-09 | 1.18E-08 | 10.85465 |

|          |          |          |          |          |          |          |          |
|----------|----------|----------|----------|----------|----------|----------|----------|
| PPARA    | -0.27648 | 0.825602 | 5.521899 | -6.71293 | 2.37E-09 | 1.18E-08 | 10.84815 |
| PTP4A1   | -0.36499 | 0.776476 | 7.689494 | -6.71256 | 2.37E-09 | 1.19E-08 | 10.84656 |
| PBX2     | -0.26276 | 0.833492 | 5.577848 | -6.71006 | 2.40E-09 | 1.20E-08 | 10.83573 |
| MYH9     | 0.310487 | 1.240127 | 7.987089 | 6.703655 | 2.47E-09 | 1.23E-08 | 10.80799 |
| SLC27A5  | -0.25811 | 0.836183 | 6.105443 | -6.70334 | 2.47E-09 | 1.23E-08 | 10.80663 |
| HECA     | 0.401126 | 1.320539 | 7.457342 | 6.702645 | 2.48E-09 | 1.24E-08 | 10.80362 |
| TPK1     | 0.420389 | 1.338288 | 5.245823 | 6.701774 | 2.49E-09 | 1.24E-08 | 10.79985 |
| ENTPD4   | 0.230586 | 1.173312 | 5.950886 | 6.701168 | 2.50E-09 | 1.24E-08 | 10.79722 |
| HNMT     | -0.29355 | 0.815892 | 7.647595 | -6.70089 | 2.50E-09 | 1.24E-08 | 10.79603 |
| C17orf62 | 0.406831 | 1.325771 | 5.901899 | 6.699615 | 2.51E-09 | 1.25E-08 | 10.7905  |
| SSBP2    | 0.349756 | 1.274345 | 5.632405 | 6.699538 | 2.51E-09 | 1.25E-08 | 10.79016 |
| METTL7A  | -0.43322 | 0.740606 | 9.353165 | -6.69806 | 2.53E-09 | 1.26E-08 | 10.78374 |
| ZBED8    | 0.429664 | 1.34692  | 4.537089 | 6.696493 | 2.55E-09 | 1.26E-08 | 10.77698 |
| TBKBP1   | -0.25191 | 0.839784 | 5.686076 | -6.68609 | 2.67E-09 | 1.32E-08 | 10.73193 |
| COL5A2   | 0.358682 | 1.282254 | 4.744177 | 6.685189 | 2.68E-09 | 1.33E-08 | 10.72805 |
| SIGLEC1  | 0.335369 | 1.2617   | 5.279873 | 6.683185 | 2.70E-09 | 1.34E-08 | 10.71937 |
| MIOS     | 0.27415  | 1.209282 | 6.855823 | 6.679556 | 2.74E-09 | 1.36E-08 | 10.70367 |
| ANP32B   | 0.317938 | 1.246548 | 9.259114 | 6.679129 | 2.75E-09 | 1.36E-08 | 10.70182 |
| RBX1     | 0.290718 | 1.223249 | 9.73557  | 6.677437 | 2.77E-09 | 1.37E-08 | 10.6945  |
| SIK3     | -0.22014 | 0.858483 | 6.31     | -6.67609 | 2.79E-09 | 1.38E-08 | 10.68867 |
| ADGRL4   | 0.568762 | 1.48325  | 5.323671 | 6.675158 | 2.80E-09 | 1.38E-08 | 10.68465 |
| CXCL12   | 0.813617 | 1.757612 | 8.71443  | 6.674218 | 2.81E-09 | 1.39E-08 | 10.68058 |
| KIAA0753 | 0.303669 | 1.23428  | 6.879241 | 6.673778 | 2.82E-09 | 1.39E-08 | 10.67868 |
| LHFPL2   | 0.416482 | 1.334669 | 6.626582 | 6.671987 | 2.84E-09 | 1.40E-08 | 10.67093 |
| ZFP36    | -0.89244 | 0.538703 | 8.460253 | -6.67192 | 2.84E-09 | 1.40E-08 | 10.67064 |
| AGPAT1   | -0.27521 | 0.82633  | 8.008734 | -6.66456 | 2.93E-09 | 1.44E-08 | 10.63879 |
| DNASE2   | 0.322859 | 1.250807 | 6.52443  | 6.664466 | 2.93E-09 | 1.44E-08 | 10.6384  |
| KDELC1   | 0.663827 | 1.58428  | 5.133165 | 6.658935 | 3.01E-09 | 1.48E-08 | 10.61449 |
| PLIN3    | 0.430652 | 1.347843 | 7.999241 | 6.655741 | 3.05E-09 | 1.50E-08 | 10.60068 |
| LAMP3    | 0.849381 | 1.801727 | 4.727848 | 6.653282 | 3.08E-09 | 1.51E-08 | 10.59006 |
| COPB1    | 0.236238 | 1.177917 | 9.887595 | 6.651846 | 3.10E-09 | 1.52E-08 | 10.58385 |
| ARFIP1   | 0.314993 | 1.244006 | 6.708101 | 6.651372 | 3.11E-09 | 1.53E-08 | 10.5818  |
| AOC1     | -1.44853 | 0.366394 | 10.43557 | -6.65045 | 3.12E-09 | 1.53E-08 | 10.57783 |
| ASAP1    | 0.265224 | 1.201823 | 5.284051 | 6.646596 | 3.17E-09 | 1.56E-08 | 10.56117 |
| NAE1     | 0.384348 | 1.30527  | 8.916203 | 6.64616  | 3.18E-09 | 1.56E-08 | 10.55928 |
| MAFB     | 0.772095 | 1.707748 | 7.758608 | 6.645756 | 3.18E-09 | 1.56E-08 | 10.55754 |
| ZDHHC4   | -0.25377 | 0.838699 | 8.125949 | -6.64495 | 3.20E-09 | 1.56E-08 | 10.55404 |
| SHC1     | 0.25747  | 1.195381 | 7.311899 | 6.644163 | 3.21E-09 | 1.57E-08 | 10.55066 |
| CXCL1    | 0.796897 | 1.737361 | 4.97962  | 6.641651 | 3.24E-09 | 1.59E-08 | 10.5398  |
| GRAMD1C  | -0.48111 | 0.716425 | 6.896203 | -6.64073 | 3.26E-09 | 1.59E-08 | 10.53581 |
| SLC25A32 | -0.49872 | 0.707737 | 6.984937 | -6.6401  | 3.26E-09 | 1.59E-08 | 10.53309 |
| C12orf10 | -0.30897 | 0.80722  | 7.922025 | -6.63902 | 3.28E-09 | 1.60E-08 | 10.52846 |
| CTSK     | 0.641871 | 1.560351 | 6.355949 | 6.636297 | 3.32E-09 | 1.62E-08 | 10.51668 |
| MBIP     | -0.23366 | 0.850477 | 5.786962 | -6.63536 | 3.33E-09 | 1.63E-08 | 10.51263 |
| SIPA1L1  | -0.20292 | 0.868787 | 6.490886 | -6.63474 | 3.34E-09 | 1.63E-08 | 10.50994 |
| PTGS1    | 0.394776 | 1.314739 | 5.071646 | 6.634183 | 3.35E-09 | 1.63E-08 | 10.50755 |
| NHEJ1    | -0.26951 | 0.829604 | 7.553291 | -6.63413 | 3.35E-09 | 1.63E-08 | 10.5073  |

|          |          |          |          |          |          |          |          |
|----------|----------|----------|----------|----------|----------|----------|----------|
| LIN7A    | -0.34036 | 0.789847 | 5.16     | -6.63306 | 3.37E-09 | 1.64E-08 | 10.50268 |
| TIA1     | 0.298142 | 1.22956  | 6.123671 | 6.632772 | 3.37E-09 | 1.64E-08 | 10.50145 |
| ACSBG2   | -0.42704 | 0.743789 | 5.336835 | -6.63198 | 3.38E-09 | 1.64E-08 | 10.49806 |
| NCF4     | 0.412701 | 1.331176 | 4.898481 | 6.63067  | 3.40E-09 | 1.65E-08 | 10.49238 |
| TYK2     | -0.2686  | 0.830123 | 7.67519  | -6.62973 | 3.42E-09 | 1.66E-08 | 10.48831 |
| PLEK2    | 0.310152 | 1.239838 | 6.884557 | 6.628386 | 3.44E-09 | 1.67E-08 | 10.48252 |
| TM4SF1   | 0.708682 | 1.634311 | 6.69038  | 6.627661 | 3.45E-09 | 1.67E-08 | 10.47939 |
| DNAJC6   | -0.2253  | 0.855415 | 6.270886 | -6.6253  | 3.48E-09 | 1.69E-08 | 10.46918 |
| PARM1    | -0.48189 | 0.716039 | 8.155443 | -6.62472 | 3.49E-09 | 1.69E-08 | 10.46671 |
| SERPINA3 | 1.932128 | 3.816176 | 8.18557  | 6.616814 | 3.62E-09 | 1.75E-08 | 10.43258 |
| BCLAF1   | 0.285889 | 1.219162 | 7.198987 | 6.613513 | 3.67E-09 | 1.77E-08 | 10.41833 |
| STAG1    | 0.303669 | 1.23428  | 6.429241 | 6.612732 | 3.68E-09 | 1.78E-08 | 10.41496 |
| SLC10A2  | -0.90055 | 0.535681 | 7.951646 | -6.61176 | 3.70E-09 | 1.79E-08 | 10.41078 |
| MAPK10   | -0.24238 | 0.845347 | 6.42962  | -6.61048 | 3.72E-09 | 1.80E-08 | 10.40523 |
| FTO      | -0.23778 | 0.848049 | 8.857848 | -6.60854 | 3.75E-09 | 1.81E-08 | 10.39689 |
| GCC2     | 0.380204 | 1.301526 | 7.871646 | 6.604471 | 3.82E-09 | 1.84E-08 | 10.37933 |
| TAPBPL   | 0.526113 | 1.440044 | 6.487595 | 6.60065  | 3.88E-09 | 1.87E-08 | 10.36286 |
| ALDH1B1  | -0.60599 | 0.657018 | 7.551646 | -6.59996 | 3.89E-09 | 1.88E-08 | 10.3599  |
| ANXA9    | -0.65063 | 0.637004 | 6.922785 | -6.59666 | 3.95E-09 | 1.90E-08 | 10.34565 |
| CNOT8    | 0.278478 | 1.212915 | 6.657848 | 6.596404 | 3.96E-09 | 1.90E-08 | 10.34455 |
| DOCK10   | 0.442233 | 1.358706 | 4.138861 | 6.595175 | 3.98E-09 | 1.91E-08 | 10.33925 |
| ST3GAL5  | 0.354756 | 1.27877  | 6.119494 | 6.593214 | 4.01E-09 | 1.93E-08 | 10.3308  |
| NOP16    | -0.32443 | 0.798616 | 6.327089 | -6.59215 | 4.03E-09 | 1.94E-08 | 10.3262  |
| PLA2G4C  | 0.720211 | 1.647423 | 6.622152 | 6.589659 | 4.07E-09 | 1.96E-08 | 10.31548 |
| PRDX4    | 0.483037 | 1.397683 | 9.230253 | 6.587629 | 4.11E-09 | 1.97E-08 | 10.30673 |
| ACACB    | -0.37933 | 0.768796 | 6.886329 | -6.58687 | 4.12E-09 | 1.98E-08 | 10.30348 |
| RPS24    | 0.254829 | 1.193194 | 13.04101 | 6.584268 | 4.17E-09 | 2.00E-08 | 10.29225 |
| BRD3     | 0.342431 | 1.267891 | 7.661519 | 6.583845 | 4.18E-09 | 2.00E-08 | 10.29042 |
| AHNAK    | 0.361206 | 1.284499 | 7.342405 | 6.578931 | 4.27E-09 | 2.04E-08 | 10.26926 |
| PLEKHB2  | -0.34502 | 0.787297 | 9.265443 | -6.57818 | 4.29E-09 | 2.05E-08 | 10.26602 |
| AGR2     | 0.998511 | 1.997937 | 5.511013 | 6.578096 | 4.29E-09 | 2.05E-08 | 10.26566 |
| KCNN2    | -1.01779 | 0.493871 | 5.245063 | -6.57588 | 4.33E-09 | 2.07E-08 | 10.2561  |
| RHCG     | -0.97589 | 0.508426 | 8.242785 | -6.57359 | 4.37E-09 | 2.09E-08 | 10.24624 |
| SSTR2    | -0.38015 | 0.768357 | 5.116203 | -6.57118 | 4.42E-09 | 2.11E-08 | 10.23588 |
| GNA11    | -0.23762 | 0.848142 | 7.541392 | -6.57036 | 4.43E-09 | 2.12E-08 | 10.23234 |
| PAH      | -1.05329 | 0.481869 | 11.75937 | -6.5698  | 4.45E-09 | 2.12E-08 | 10.22995 |
| FAM198B  | 0.403636 | 1.322838 | 4.308608 | 6.569413 | 4.45E-09 | 2.12E-08 | 10.22826 |
| LPAR6    | 0.457365 | 1.373032 | 7.479747 | 6.568967 | 4.46E-09 | 2.13E-08 | 10.22635 |
| CPNE6    | -1.0669  | 0.477342 | 5.739114 | -6.568   | 4.48E-09 | 2.13E-08 | 10.22219 |
| LYPD1    | 0.593478 | 1.50888  | 5.23443  | 6.566979 | 4.50E-09 | 2.14E-08 | 10.21778 |
| CTSB     | -0.42505 | 0.744812 | 10.83962 | -6.56509 | 4.54E-09 | 2.16E-08 | 10.20963 |
| NDUFS4   | -0.27074 | 0.828896 | 9.387342 | -6.56315 | 4.58E-09 | 2.18E-08 | 10.20129 |
| LETM1    | -0.27305 | 0.827568 | 7.220506 | -6.56088 | 4.62E-09 | 2.20E-08 | 10.19153 |
| TOX      | 0.283742 | 1.217348 | 4.234177 | 6.557873 | 4.68E-09 | 2.22E-08 | 10.17859 |
| OFD1     | 0.384018 | 1.304972 | 7.702152 | 6.556835 | 4.71E-09 | 2.23E-08 | 10.17413 |
| OPA1     | -0.25684 | 0.836916 | 6.623797 | -6.55435 | 4.76E-09 | 2.26E-08 | 10.16345 |
| TCF12    | 0.349736 | 1.274328 | 8.166962 | 6.554014 | 4.76E-09 | 2.26E-08 | 10.16198 |

|           |          |          |          |          |          |          |          |
|-----------|----------|----------|----------|----------|----------|----------|----------|
| NDUFV1    | -0.23628 | 0.848933 | 10.69152 | -6.55165 | 4.81E-09 | 2.28E-08 | 10.15181 |
| PMS1      | 0.369578 | 1.291975 | 6.681772 | 6.54657  | 4.92E-09 | 2.33E-08 | 10.12996 |
| GGTLC1    | -0.44821 | 0.732953 | 9.318861 | -6.54473 | 4.96E-09 | 2.35E-08 | 10.12205 |
| DECR1     | -0.27163 | 0.828385 | 10.54241 | -6.54248 | 5.01E-09 | 2.37E-08 | 10.11236 |
| CAPG      | 0.635679 | 1.553668 | 8.163797 | 6.536424 | 5.15E-09 | 2.43E-08 | 10.08633 |
| NPHS1     | -0.61253 | 0.654049 | 5.448481 | -6.53319 | 5.22E-09 | 2.46E-08 | 10.07241 |
| FAS       | 0.651113 | 1.57038  | 6.34481  | 6.53066  | 5.28E-09 | 2.49E-08 | 10.06156 |
| PSIP1     | 0.35365  | 1.277789 | 7.204684 | 6.52674  | 5.37E-09 | 2.53E-08 | 10.04471 |
| RAC3      | -0.31375 | 0.804545 | 4.436329 | -6.52634 | 5.38E-09 | 2.54E-08 | 10.04299 |
| CDK2AP1   | 0.262391 | 1.199465 | 9.917215 | 6.524146 | 5.43E-09 | 2.56E-08 | 10.03356 |
| BPI       | -1.21841 | 0.429755 | 5.824304 | -6.5239  | 5.44E-09 | 2.56E-08 | 10.0325  |
| TRAP1     | -0.28996 | 0.817924 | 9.449747 | -6.52156 | 5.49E-09 | 2.58E-08 | 10.02247 |
| ALDH3A1   | -0.27411 | 0.82696  | 4.925063 | -6.52109 | 5.50E-09 | 2.59E-08 | 10.02044 |
| HDCC2     | -0.33941 | 0.790366 | 7.721266 | -6.52041 | 5.52E-09 | 2.60E-08 | 10.01751 |
| TEX10     | 0.231542 | 1.174089 | 6.690633 | 6.519519 | 5.54E-09 | 2.60E-08 | 10.01368 |
| DENND1A   | -0.35742 | 0.780557 | 5.355696 | -6.51608 | 5.62E-09 | 2.64E-08 | 9.998893 |
| HMGNA4    | 0.267951 | 1.204097 | 8.60519  | 6.512923 | 5.70E-09 | 2.68E-08 | 9.985353 |
| KCNJ8     | 0.661258 | 1.581461 | 5.89557  | 6.511012 | 5.75E-09 | 2.70E-08 | 9.97715  |
| EFHC1     | 0.409157 | 1.327909 | 5.375696 | 6.508836 | 5.81E-09 | 2.72E-08 | 9.967805 |
| NR2F2     | 0.354381 | 1.278437 | 7.656076 | 6.506866 | 5.86E-09 | 2.74E-08 | 9.959349 |
| PCSK1N    | -0.5986  | 0.660396 | 8.325823 | -6.50423 | 5.92E-09 | 2.77E-08 | 9.948047 |
| USE1      | -0.24951 | 0.841184 | 7.011646 | -6.50403 | 5.93E-09 | 2.78E-08 | 9.947185 |
| PRR5      | -0.32254 | 0.799659 | 6.742658 | -6.50291 | 5.96E-09 | 2.79E-08 | 9.942364 |
| SETX      | 0.260086 | 1.19755  | 6.608861 | 6.500657 | 6.02E-09 | 2.81E-08 | 9.932696 |
| IMPDH2    | 0.407833 | 1.326691 | 9.051013 | 6.49959  | 6.05E-09 | 2.83E-08 | 9.928116 |
| FOLH1     | -0.98631 | 0.504767 | 7.635823 | -6.49816 | 6.08E-09 | 2.84E-08 | 9.921996 |
| TBP       | 0.239631 | 1.180691 | 6.685316 | 6.494108 | 6.19E-09 | 2.89E-08 | 9.904592 |
| PLIN2     | -0.67543 | 0.626143 | 10.59329 | -6.4908  | 6.28E-09 | 2.93E-08 | 9.890386 |
| ATP6VOE2  | -0.58521 | 0.666552 | 8.629241 | -6.48632 | 6.41E-09 | 2.99E-08 | 9.871185 |
| PKM       | 0.525896 | 1.439827 | 8.487722 | 6.485804 | 6.42E-09 | 2.99E-08 | 9.868972 |
| C9orf91   | 0.309783 | 1.239521 | 4.65962  | 6.484927 | 6.45E-09 | 3.00E-08 | 9.865209 |
| TNFRSF10I | -0.34992 | 0.784627 | 5.28557  | -6.48457 | 6.46E-09 | 3.01E-08 | 9.863661 |
| CSGALNAC  | 0.629032 | 1.546527 | 6.076456 | 6.482068 | 6.53E-09 | 3.04E-08 | 9.852949 |
| GADD45GI  | -0.33889 | 0.790651 | 6.591266 | -6.4814  | 6.55E-09 | 3.04E-08 | 9.850088 |
| ZKSCAN7   | 0.259209 | 1.196823 | 4.810886 | 6.480335 | 6.58E-09 | 3.06E-08 | 9.845519 |
| TIPARP    | -0.99766 | 0.500811 | 8.583038 | -6.47896 | 6.62E-09 | 3.07E-08 | 9.839625 |
| STAB1     | 0.386752 | 1.307447 | 6.081772 | 6.477278 | 6.66E-09 | 3.09E-08 | 9.832412 |
| GYS1      | -0.28704 | 0.819581 | 6.976835 | -6.47159 | 6.83E-09 | 3.17E-08 | 9.808021 |
| SLCO2A1   | 0.465646 | 1.380935 | 7.11038  | 6.470444 | 6.87E-09 | 3.18E-08 | 9.803121 |
| EVX1      | -0.36308 | 0.777501 | 5.030506 | -6.46939 | 6.90E-09 | 3.20E-08 | 9.798585 |
| OXSM      | -0.29493 | 0.815113 | 7.585063 | -6.4693  | 6.90E-09 | 3.20E-08 | 9.798227 |
| CHFR      | 0.333748 | 1.260284 | 6.153544 | 6.469162 | 6.91E-09 | 3.20E-08 | 9.797625 |
| ENG       | 0.335949 | 1.262207 | 6.156203 | 6.467835 | 6.95E-09 | 3.21E-08 | 9.791938 |
| RPA2      | 0.359974 | 1.283402 | 7.796456 | 6.466075 | 7.00E-09 | 3.24E-08 | 9.784397 |
| ITK       | 0.42365  | 1.341316 | 4.193924 | 6.464208 | 7.06E-09 | 3.26E-08 | 9.776397 |
| RHBDF2    | 0.3511   | 1.275533 | 5.312532 | 6.462209 | 7.12E-09 | 3.29E-08 | 9.767835 |
| TMEM184   | 0.319091 | 1.247544 | 6.973291 | 6.461991 | 7.12E-09 | 3.29E-08 | 9.7669   |

|          |          |          |          |          |          |          |          |
|----------|----------|----------|----------|----------|----------|----------|----------|
| ESRP2    | -0.34555 | 0.787006 | 6.848481 | -6.46152 | 7.14E-09 | 3.29E-08 | 9.764905 |
| SPARC    | 0.70444  | 1.629512 | 8.428608 | 6.460345 | 7.18E-09 | 3.31E-08 | 9.75985  |
| CALCOCO1 | -0.27644 | 0.825624 | 6.962785 | -6.45863 | 7.23E-09 | 3.33E-08 | 9.752498 |
| PPT2     | -0.24643 | 0.84298  | 7.712278 | -6.45788 | 7.25E-09 | 3.34E-08 | 9.74931  |
| ARSA     | -0.27177 | 0.828302 | 6.175823 | -6.45625 | 7.31E-09 | 3.36E-08 | 9.742318 |
| MCAT     | -0.4191  | 0.747892 | 7.686456 | -6.45484 | 7.35E-09 | 3.38E-08 | 9.736276 |
| NLGN4X   | 0.359025 | 1.282559 | 3.89519  | 6.450587 | 7.49E-09 | 3.44E-08 | 9.718061 |
| HMG3     | 0.349888 | 1.274462 | 10.86203 | 6.449058 | 7.54E-09 | 3.47E-08 | 9.711517 |
| DUSP1    | -1.14864 | 0.451049 | 7.726709 | -6.44763 | 7.59E-09 | 3.49E-08 | 9.705416 |
| CCRN4L   | -0.34161 | 0.789158 | 5.430127 | -6.44708 | 7.60E-09 | 3.49E-08 | 9.70303  |
| NT5M     | -0.2531  | 0.83909  | 5.091013 | -6.44261 | 7.75E-09 | 3.56E-08 | 9.683925 |
| GIPC2    | -0.71606 | 0.608757 | 9.330886 | -6.44208 | 7.77E-09 | 3.56E-08 | 9.681665 |
| TRIM26   | -0.27715 | 0.825221 | 7.545316 | -6.43667 | 7.96E-09 | 3.65E-08 | 9.658478 |
| CCR5     | 0.448709 | 1.364818 | 6.655696 | 6.434097 | 8.05E-09 | 3.69E-08 | 9.647488 |
| TIMM10   | -0.30457 | 0.809682 | 8.268861 | -6.42741 | 8.28E-09 | 3.79E-08 | 9.618892 |
| CENPU    | 0.382833 | 1.303899 | 4.40557  | 6.426788 | 8.31E-09 | 3.80E-08 | 9.616227 |
| GBA3     | -0.64498 | 0.639502 | 10.21101 | -6.4266  | 8.31E-09 | 3.80E-08 | 9.615442 |
| TEX2     | -0.30964 | 0.806844 | 7.676962 | -6.42634 | 8.32E-09 | 3.81E-08 | 9.614307 |
| RPL35A   | 0.382668 | 1.303751 | 11.88354 | 6.423977 | 8.41E-09 | 3.84E-08 | 9.604205 |
| IFIT5    | 0.43193  | 1.349037 | 7.204557 | 6.422977 | 8.45E-09 | 3.86E-08 | 9.599932 |
| OLFM4    | 1.720982 | 3.296606 | 5.622152 | 6.420524 | 8.54E-09 | 3.90E-08 | 9.589445 |
| SLC31A2  | -0.61318 | 0.653753 | 8.108861 | -6.42009 | 8.55E-09 | 3.90E-08 | 9.587598 |
| DNPEP    | -0.20419 | 0.868026 | 8.342532 | -6.41912 | 8.59E-09 | 3.92E-08 | 9.583423 |
| YBX3     | 0.479914 | 1.394661 | 9.590253 | 6.418322 | 8.62E-09 | 3.93E-08 | 9.580032 |
| IGFBP6   | 1.063347 | 2.089773 | 7.461139 | 6.416832 | 8.68E-09 | 3.95E-08 | 9.57366  |
| ARNTL2   | 0.277148 | 1.211797 | 4.344684 | 6.416319 | 8.69E-09 | 3.96E-08 | 9.571467 |
| SAP18    | -0.21903 | 0.859146 | 8.853291 | -6.41498 | 8.75E-09 | 3.98E-08 | 9.565759 |
| KRT10    | 0.24832  | 1.187823 | 8.841772 | 6.41068  | 8.91E-09 | 4.05E-08 | 9.54737  |
| INPP5D   | 0.310613 | 1.240234 | 5.288228 | 6.410392 | 8.92E-09 | 4.06E-08 | 9.546138 |
| SHTN1    | 0.497582 | 1.411846 | 6.986329 | 6.40987  | 8.94E-09 | 4.06E-08 | 9.543909 |
| GOLGA3   | 0.26139  | 1.198633 | 6.728101 | 6.403298 | 9.20E-09 | 4.18E-08 | 9.515831 |
| LMNB1    | 0.295797 | 1.227563 | 4.54443  | 6.403064 | 9.21E-09 | 4.18E-08 | 9.514832 |
| C2orf72  | -0.27132 | 0.828559 | 5.382532 | -6.40063 | 9.31E-09 | 4.22E-08 | 9.504436 |
| IL1R1    | 0.313169 | 1.242434 | 5.628861 | 6.400452 | 9.32E-09 | 4.22E-08 | 9.503678 |
| PRKCQ    | 0.466825 | 1.382064 | 6.438481 | 6.398247 | 9.41E-09 | 4.26E-08 | 9.494262 |
| MYL3     | -0.31043 | 0.806402 | 7.409241 | -6.39161 | 9.68E-09 | 4.38E-08 | 9.465942 |
| PYGB     | 0.280777 | 1.214849 | 7.907722 | 6.386234 | 9.91E-09 | 4.49E-08 | 9.442976 |
| SKIV2L2  | 0.261574 | 1.198786 | 7.88557  | 6.385681 | 9.94E-09 | 4.49E-08 | 9.440618 |
| SLC22A5  | -0.48736 | 0.713327 | 9.067722 | -6.38447 | 9.99E-09 | 4.52E-08 | 9.435447 |
| SLFN12   | 0.37087  | 1.293132 | 4.464051 | 6.384059 | 1.00E-08 | 4.52E-08 | 9.433696 |
| GZMH     | 0.614592 | 1.531124 | 5.296076 | 6.383809 | 1.00E-08 | 4.52E-08 | 9.432628 |
| EFEMP1   | 0.559374 | 1.47363  | 8.228228 | 6.383214 | 1.00E-08 | 4.53E-08 | 9.430088 |
| SLC16A4  | -0.42416 | 0.745274 | 10.04304 | -6.38319 | 1.00E-08 | 4.53E-08 | 9.429981 |
| SEC11A   | 0.230527 | 1.173263 | 10.71456 | 6.381002 | 1.01E-08 | 4.57E-08 | 9.420651 |
| TESK1    | -0.29194 | 0.816801 | 7.196962 | -6.37899 | 1.02E-08 | 4.61E-08 | 9.412082 |
| HMGB2    | 0.537556 | 1.451511 | 7.949114 | 6.378187 | 1.03E-08 | 4.62E-08 | 9.408643 |
| NAB2     | -0.33037 | 0.795333 | 5.947215 | -6.37786 | 1.03E-08 | 4.63E-08 | 9.407254 |

|          |          |          |          |          |          |          |          |
|----------|----------|----------|----------|----------|----------|----------|----------|
| SRPX2    | 0.336812 | 1.262962 | 4.367215 | 6.376614 | 1.03E-08 | 4.65E-08 | 9.401932 |
| NUP155   | 0.263801 | 1.200638 | 5.422152 | 6.376022 | 1.04E-08 | 4.66E-08 | 9.399405 |
| GNL3     | 0.353636 | 1.277777 | 7.167722 | 6.375535 | 1.04E-08 | 4.67E-08 | 9.397329 |
| RNF128   | -0.43352 | 0.740451 | 9.183038 | -6.37473 | 1.04E-08 | 4.68E-08 | 9.393897 |
| FGF1     | -0.82715 | 0.56364  | 6.677089 | -6.37283 | 1.05E-08 | 4.72E-08 | 9.385808 |
| B4GALT5  | 0.621067 | 1.538012 | 8.182911 | 6.367162 | 1.08E-08 | 4.83E-08 | 9.361622 |
| RBM22    | 0.232918 | 1.17521  | 7.323165 | 6.366751 | 1.08E-08 | 4.84E-08 | 9.35987  |
| LEPROT   | 0.375217 | 1.297035 | 10.08152 | 6.366724 | 1.08E-08 | 4.84E-08 | 9.359755 |
| AP1M2    | -0.42088 | 0.746967 | 8.358101 | -6.35992 | 1.11E-08 | 4.98E-08 | 9.330747 |
| TCN2     | -0.43931 | 0.737488 | 9.106709 | -6.35942 | 1.11E-08 | 4.99E-08 | 9.328618 |
| MPZL2    | 0.345718 | 1.270783 | 4.893544 | 6.356827 | 1.13E-08 | 5.04E-08 | 9.317572 |
| EXOSC10  | 0.396476 | 1.316288 | 5.679747 | 6.356005 | 1.13E-08 | 5.06E-08 | 9.31407  |
| ADAR     | 0.333702 | 1.260243 | 9.784177 | 6.355184 | 1.13E-08 | 5.07E-08 | 9.310573 |
| NTAN1    | 0.270949 | 1.206601 | 6.864051 | 6.354621 | 1.14E-08 | 5.08E-08 | 9.308171 |
| KAT5     | -0.20664 | 0.866553 | 7.737595 | -6.35155 | 1.15E-08 | 5.15E-08 | 9.295085 |
| FAM193A  | 0.312312 | 1.241696 | 5.966329 | 6.349485 | 1.16E-08 | 5.19E-08 | 9.286294 |
| FOCAD    | 0.454974 | 1.370758 | 6.401139 | 6.349402 | 1.16E-08 | 5.19E-08 | 9.285937 |
| CUL1     | 0.293103 | 1.225273 | 7.135696 | 6.347905 | 1.17E-08 | 5.22E-08 | 9.279562 |
| DDX39A   | 0.290909 | 1.223411 | 6.871519 | 6.342137 | 1.20E-08 | 5.35E-08 | 9.254999 |
| SH3BP2   | -0.30188 | 0.811192 | 6.579114 | -6.34187 | 1.20E-08 | 5.35E-08 | 9.253857 |
| SLC17A1  | -0.70917 | 0.611672 | 9.542025 | -6.34016 | 1.21E-08 | 5.39E-08 | 9.246564 |
| C1orf116 | 0.299196 | 1.230459 | 5.290633 | 6.338742 | 1.22E-08 | 5.42E-08 | 9.240543 |
| FERMT2   | -0.37714 | 0.769962 | 7.762025 | -6.33865 | 1.22E-08 | 5.42E-08 | 9.240155 |
| TG       | -0.44302 | 0.735591 | 6.023418 | -6.33847 | 1.22E-08 | 5.42E-08 | 9.2394   |
| IRF1     | 0.757628 | 1.690709 | 6.544304 | 6.337172 | 1.23E-08 | 5.45E-08 | 9.23386  |
| SEPHS2   | -0.33569 | 0.792408 | 10.34304 | -6.33451 | 1.24E-08 | 5.51E-08 | 9.222533 |
| SDC1     | -0.5125  | 0.701005 | 9.544177 | -6.33281 | 1.25E-08 | 5.55E-08 | 9.215275 |
| TNS1     | -0.29202 | 0.81676  | 7.503671 | -6.33224 | 1.25E-08 | 5.56E-08 | 9.212868 |
| ACACA    | 0.309941 | 1.239657 | 6.613165 | 6.331468 | 1.26E-08 | 5.57E-08 | 9.209585 |
| INPPL1   | -0.21684 | 0.860445 | 7.150506 | -6.33117 | 1.26E-08 | 5.58E-08 | 9.208299 |
| TBCB     | 0.240481 | 1.181386 | 8.829367 | 6.330815 | 1.26E-08 | 5.58E-08 | 9.206804 |
| DHODH    | -0.26291 | 0.833408 | 5.091266 | -6.32885 | 1.27E-08 | 5.63E-08 | 9.19846  |
| TMEM248  | 0.236871 | 1.178434 | 8.561772 | 6.327385 | 1.28E-08 | 5.66E-08 | 9.192209 |
| GLYR1    | -0.23974 | 0.8469   | 5.878987 | -6.32707 | 1.28E-08 | 5.67E-08 | 9.190859 |
| NCKAP1L  | 0.549084 | 1.463157 | 6.310886 | 6.325799 | 1.29E-08 | 5.70E-08 | 9.185462 |
| TREM2    | 0.446937 | 1.363143 | 6.304304 | 6.321967 | 1.31E-08 | 5.79E-08 | 9.169159 |
| ADD3     | -0.35208 | 0.783453 | 10.0838  | -6.31803 | 1.33E-08 | 5.88E-08 | 9.152429 |
| HSPA4L   | -0.44593 | 0.734112 | 6.873291 | -6.31779 | 1.33E-08 | 5.89E-08 | 9.1514   |
| SH2D1A   | 0.337385 | 1.263464 | 4.515063 | 6.315884 | 1.35E-08 | 5.93E-08 | 9.143292 |
| RSRP1    | 0.485474 | 1.400046 | 7.288228 | 6.315768 | 1.35E-08 | 5.93E-08 | 9.142797 |
| C11orf73 | 0.296212 | 1.227916 | 4.468734 | 6.314876 | 1.35E-08 | 5.95E-08 | 9.139004 |
| APOA1    | -0.30918 | 0.807102 | 5.120633 | -6.31127 | 1.37E-08 | 6.04E-08 | 9.123658 |
| HOXA10   | 0.337971 | 1.263978 | 6.979873 | 6.309536 | 1.38E-08 | 6.09E-08 | 9.116303 |
| HIP1R    | -0.30501 | 0.809435 | 6.130633 | -6.30329 | 1.42E-08 | 6.25E-08 | 9.08978  |
| SUCLA2   | -0.4304  | 0.742055 | 8.903038 | -6.30329 | 1.42E-08 | 6.25E-08 | 9.089768 |
| TMED10   | 0.247108 | 1.186826 | 9.551266 | 6.29999  | 1.44E-08 | 6.33E-08 | 9.075737 |
| PTPRK    | 0.381008 | 1.302251 | 9.126329 | 6.299808 | 1.44E-08 | 6.33E-08 | 9.074966 |

|          |          |          |          |          |          |          |          |
|----------|----------|----------|----------|----------|----------|----------|----------|
| RNF139   | 0.260817 | 1.198157 | 8.240253 | 6.299722 | 1.44E-08 | 6.33E-08 | 9.074602 |
| FAR2     | 0.415929 | 1.334157 | 5.284177 | 6.29844  | 1.45E-08 | 6.37E-08 | 9.069153 |
| MPHOSPH  | 0.246206 | 1.186083 | 8.149367 | 6.297251 | 1.46E-08 | 6.39E-08 | 9.064104 |
| GCNT3    | 0.746001 | 1.677138 | 6.035316 | 6.297201 | 1.46E-08 | 6.39E-08 | 9.063891 |
| CXCL10   | 1.234868 | 2.353599 | 6.351266 | 6.296555 | 1.46E-08 | 6.41E-08 | 9.061145 |
| ZBTB7B   | -0.28512 | 0.820674 | 5.383291 | -6.29312 | 1.48E-08 | 6.50E-08 | 9.046564 |
| GPN3     | -0.23372 | 0.850438 | 7.902152 | -6.29253 | 1.49E-08 | 6.51E-08 | 9.044034 |
| FAM212B  | -0.27385 | 0.827111 | 5.794304 | -6.29056 | 1.50E-08 | 6.57E-08 | 9.035702 |
| JADE3    | 0.312095 | 1.241509 | 5.266456 | 6.288931 | 1.51E-08 | 6.61E-08 | 9.028769 |
| ACADVL   | -0.28094 | 0.823057 | 10.52873 | -6.28884 | 1.51E-08 | 6.61E-08 | 9.028376 |
| LAX1     | 0.374071 | 1.296005 | 4.315823 | 6.288672 | 1.51E-08 | 6.61E-08 | 9.027668 |
| S100A8   | 2.071601 | 4.203528 | 6.85557  | 6.286271 | 1.53E-08 | 6.68E-08 | 9.017475 |
| IGFBP4   | -0.56012 | 0.678246 | 9.483418 | -6.28598 | 1.53E-08 | 6.68E-08 | 9.016229 |
| WIF1     | -0.35969 | 0.779332 | 4.138228 | -6.28593 | 1.53E-08 | 6.68E-08 | 9.016017 |
| PIK3C2B  | 0.332503 | 1.259196 | 7.400633 | 6.282026 | 1.56E-08 | 6.79E-08 | 8.999455 |
| ABCG1    | 0.439058 | 1.355719 | 5.841013 | 6.280928 | 1.57E-08 | 6.82E-08 | 8.994797 |
| GDAP2    | -0.23823 | 0.847786 | 5.441139 | -6.27812 | 1.58E-08 | 6.90E-08 | 8.982869 |
| BCL11A   | 0.271535 | 1.207091 | 4.668861 | 6.277336 | 1.59E-08 | 6.92E-08 | 8.97955  |
| RAB8B    | 0.329407 | 1.256497 | 6.664557 | 6.27516  | 1.60E-08 | 6.98E-08 | 8.970318 |
| IRF2BP1  | -0.2481  | 0.842007 | 7.346582 | -6.27513 | 1.61E-08 | 6.98E-08 | 8.970176 |
| CDADC1   | -0.3027  | 0.810733 | 5.427468 | -6.27507 | 1.61E-08 | 6.98E-08 | 8.969949 |
| MAGED1   | 0.253939 | 1.192459 | 9.886076 | 6.274948 | 1.61E-08 | 6.98E-08 | 8.969419 |
| SERPINA5 | -0.62212 | 0.649715 | 10.07013 | -6.27348 | 1.62E-08 | 7.02E-08 | 8.963197 |
| ALDH8A1  | -0.59697 | 0.661141 | 10.17063 | -6.27287 | 1.62E-08 | 7.03E-08 | 8.960597 |
| GPC3     | -0.91132 | 0.531697 | 7.59519  | -6.27186 | 1.63E-08 | 7.06E-08 | 8.956319 |
| ARF3     | -0.21802 | 0.859742 | 8.732405 | -6.26884 | 1.65E-08 | 7.15E-08 | 8.943526 |
| STS      | 0.323603 | 1.251452 | 5.222785 | 6.268359 | 1.65E-08 | 7.16E-08 | 8.941469 |
| FEV      | -0.29877 | 0.812946 | 5.080633 | -6.2681  | 1.65E-08 | 7.16E-08 | 8.940372 |
| VAMP5    | 0.479967 | 1.394712 | 6.558101 | 6.266006 | 1.67E-08 | 7.22E-08 | 8.931492 |
| NEU1     | 0.405711 | 1.324742 | 8.640127 | 6.265511 | 1.67E-08 | 7.24E-08 | 8.929394 |
| XYLB     | -0.1981  | 0.871696 | 3.848987 | -6.26056 | 1.71E-08 | 7.39E-08 | 8.9084   |
| IER5     | 0.641159 | 1.559582 | 5.9      | 6.259649 | 1.72E-08 | 7.41E-08 | 8.904537 |
| ADGRG1   | 0.483893 | 1.398513 | 8.572785 | 6.258264 | 1.73E-08 | 7.46E-08 | 8.898669 |
| PCDH1    | -0.23831 | 0.84774  | 5.219367 | -6.25557 | 1.75E-08 | 7.54E-08 | 8.887269 |
| SSPN     | 0.36222  | 1.285402 | 5.118481 | 6.254083 | 1.76E-08 | 7.58E-08 | 8.880945 |
| STK17B   | 0.322062 | 1.250116 | 4.288228 | 6.252563 | 1.77E-08 | 7.63E-08 | 8.874505 |
| ZNF14    | 0.274137 | 1.209271 | 6.778861 | 6.250315 | 1.79E-08 | 7.70E-08 | 8.86498  |
| NDUFB11  | -0.21617 | 0.860846 | 9.42557  | -6.24952 | 1.79E-08 | 7.72E-08 | 8.861625 |
| FSCN1    | 0.256271 | 1.194388 | 5.768354 | 6.249425 | 1.79E-08 | 7.72E-08 | 8.861211 |
| NEDD4L   | -0.33812 | 0.791074 | 7.583544 | -6.24911 | 1.80E-08 | 7.73E-08 | 8.859892 |
| EFNB2    | 0.440777 | 1.357335 | 6.134557 | 6.245131 | 1.83E-08 | 7.86E-08 | 8.84302  |
| SOX4     | 0.823373 | 1.769538 | 7.46481  | 6.244596 | 1.83E-08 | 7.87E-08 | 8.840751 |
| ATOX1    | -0.29558 | 0.814745 | 10.35544 | -6.24454 | 1.83E-08 | 7.87E-08 | 8.840529 |
| RPL13A   | 0.196146 | 1.145634 | 13.67215 | 6.243516 | 1.84E-08 | 7.90E-08 | 8.836177 |
| SLC6A20  | 0.506462 | 1.420563 | 4.568734 | 6.24219  | 1.85E-08 | 7.94E-08 | 8.830561 |
| SLC35G2  | 0.292826 | 1.225038 | 4.739494 | 6.240846 | 1.86E-08 | 7.99E-08 | 8.824871 |
| PPP1R11  | -0.23689 | 0.848572 | 9.362785 | -6.23678 | 1.89E-08 | 8.12E-08 | 8.80766  |

|           |          |          |          |          |          |          |          |
|-----------|----------|----------|----------|----------|----------|----------|----------|
| TUBB4B    | -0.34559 | 0.786988 | 10.61608 | -6.23621 | 1.90E-08 | 8.14E-08 | 8.805247 |
| APEH      | -0.28216 | 0.822358 | 8.661266 | -6.2302  | 1.95E-08 | 8.35E-08 | 8.779786 |
| FYB       | 0.353274 | 1.277456 | 5.251266 | 6.227206 | 1.97E-08 | 8.45E-08 | 8.767129 |
| TBC1D16   | 0.432661 | 1.349721 | 6.455949 | 6.225682 | 1.99E-08 | 8.50E-08 | 8.760682 |
| CLMN      | -0.37327 | 0.772028 | 7.44038  | -6.21849 | 2.05E-08 | 8.77E-08 | 8.730263 |
| MRPL4     | -0.25931 | 0.835488 | 7.131899 | -6.21532 | 2.08E-08 | 8.88E-08 | 8.716832 |
| VAC14     | -0.21756 | 0.860017 | 6.336076 | -6.21445 | 2.09E-08 | 8.91E-08 | 8.713178 |
| LZTS3     | -0.28783 | 0.819132 | 8.559114 | -6.21427 | 2.09E-08 | 8.92E-08 | 8.712429 |
| ACTL8     | -0.31559 | 0.803521 | 6.730127 | -6.21361 | 2.09E-08 | 8.94E-08 | 8.709621 |
| ADRA2A    | 0.430231 | 1.347449 | 4.336456 | 6.212888 | 2.10E-08 | 8.96E-08 | 8.706569 |
| LONP1     | -0.27612 | 0.825809 | 8.218354 | -6.21224 | 2.11E-08 | 8.98E-08 | 8.703843 |
| PHACTR2   | 0.345046 | 1.270192 | 5.778481 | 6.212042 | 2.11E-08 | 8.98E-08 | 8.702992 |
| CLDN1     | 0.539163 | 1.45313  | 5.288481 | 6.211916 | 2.11E-08 | 8.98E-08 | 8.702459 |
| KITLG     | 0.405843 | 1.324863 | 4.709747 | 6.210807 | 2.12E-08 | 9.02E-08 | 8.697768 |
| SETD1B    | 0.278768 | 1.213159 | 8.911013 | 6.209179 | 2.13E-08 | 9.08E-08 | 8.690888 |
| TRA2A     | 0.365296 | 1.288146 | 8.199114 | 6.208468 | 2.14E-08 | 9.10E-08 | 8.687883 |
| SPON1     | 0.503208 | 1.417362 | 5.029114 | 6.207605 | 2.15E-08 | 9.13E-08 | 8.684235 |
| ATAD2B    | 0.263788 | 1.200627 | 4.87519  | 6.206545 | 2.16E-08 | 9.17E-08 | 8.679753 |
| IGLV2-14  | 1.535652 | 2.899195 | 8.055823 | 6.203392 | 2.19E-08 | 9.29E-08 | 8.66643  |
| SGMS1     | 0.468287 | 1.383466 | 6.261266 | 6.202503 | 2.20E-08 | 9.32E-08 | 8.662674 |
| NCK2      | 0.238557 | 1.179812 | 7.882911 | 6.202432 | 2.20E-08 | 9.32E-08 | 8.662374 |
| CD37      | 0.655    | 1.574616 | 4.808608 | 6.200574 | 2.22E-08 | 9.39E-08 | 8.654519 |
| ANG       | -0.50698 | 0.703696 | 7.289747 | -6.19908 | 2.23E-08 | 9.45E-08 | 8.648212 |
| CTCF      | 0.277668 | 1.212234 | 7.654684 | 6.196284 | 2.26E-08 | 9.56E-08 | 8.636397 |
| PECR      | -0.50321 | 0.705533 | 7.722405 | -6.19464 | 2.27E-08 | 9.62E-08 | 8.62947  |
| PLEK      | 0.61193  | 1.528303 | 5.859747 | 6.193826 | 2.28E-08 | 9.65E-08 | 8.626016 |
| RBM12     | 0.311871 | 1.241316 | 6.258101 | 6.192329 | 2.30E-08 | 9.71E-08 | 8.619695 |
| MRPS35    | -0.21252 | 0.863031 | 9.782532 | -6.18791 | 2.34E-08 | 9.89E-08 | 8.601017 |
| IDI1      | -0.3243  | 0.798689 | 8.766709 | -6.18713 | 2.35E-08 | 9.92E-08 | 8.597729 |
| CYTIP     | 0.757273 | 1.690292 | 5.106329 | 6.186544 | 2.35E-08 | 9.94E-08 | 8.595265 |
| MTNR1A    | -0.60461 | 0.657649 | 5.072658 | -6.18518 | 2.37E-08 | 9.99E-08 | 8.589517 |
| ISCA1     | -0.27781 | 0.824844 | 9.437215 | -6.18486 | 2.37E-08 | 1.00E-07 | 8.588139 |
| EIF4ENIF1 | 0.251087 | 1.190103 | 6.763797 | 6.182925 | 2.39E-08 | 1.01E-07 | 8.579986 |
| IL4R      | 0.372905 | 1.294958 | 6.574684 | 6.182454 | 2.40E-08 | 1.01E-07 | 8.578    |
| AKAP1     | -0.1963  | 0.872787 | 6.972785 | -6.18192 | 2.40E-08 | 1.01E-07 | 8.575764 |
| PLA2G12A  | -0.25353 | 0.838841 | 6.619747 | -6.17912 | 2.43E-08 | 1.02E-07 | 8.563946 |
| IHH       | -0.29328 | 0.816044 | 6.465316 | -6.17692 | 2.45E-08 | 1.03E-07 | 8.554666 |
| MOCS2     | -0.27773 | 0.824886 | 7.760506 | -6.17544 | 2.47E-08 | 1.04E-07 | 8.548421 |
| SIRT3     | -0.22019 | 0.858452 | 6.522152 | -6.17399 | 2.48E-08 | 1.04E-07 | 8.54229  |
| CLDN15    | -0.2691  | 0.829835 | 8.090633 | -6.17326 | 2.49E-08 | 1.05E-07 | 8.539204 |
| ZNF76     | -0.219   | 0.859162 | 6.997215 | -6.17183 | 2.51E-08 | 1.05E-07 | 8.533155 |
| ATP2B4    | 0.218043 | 1.163155 | 5.973038 | 6.170832 | 2.52E-08 | 1.06E-07 | 8.528963 |
| PTPRCAP   | 0.47809  | 1.392898 | 5.681013 | 6.169872 | 2.53E-08 | 1.06E-07 | 8.524915 |
| HLA-DQB2  | 0.400935 | 1.320364 | 5.681392 | 6.166356 | 2.57E-08 | 1.08E-07 | 8.510085 |
| RPIA      | 0.298327 | 1.229717 | 6.871139 | 6.165919 | 2.57E-08 | 1.08E-07 | 8.508242 |
| DZIP1     | -0.30132 | 0.811507 | 6.59     | -6.1636  | 2.60E-08 | 1.09E-07 | 8.498484 |
| DLGAP5    | 0.347299 | 1.272177 | 3.728987 | 6.16266  | 2.61E-08 | 1.09E-07 | 8.494503 |



|          |          |          |          |          |          |          |          |
|----------|----------|----------|----------|----------|----------|----------|----------|
| PNPLA4   | -0.47187 | 0.721029 | 7.945063 | -6.16171 | 2.62E-08 | 1.10E-07 | 8.490494 |
| GARS     | 0.268011 | 1.204146 | 8.981519 | 6.161225 | 2.62E-08 | 1.10E-07 | 8.488451 |
| MAP3K13  | -0.22122 | 0.85784  | 5.079114 | -6.16081 | 2.63E-08 | 1.10E-07 | 8.486689 |
| HN1L     | 0.245659 | 1.185634 | 7.255443 | 6.160594 | 2.63E-08 | 1.10E-07 | 8.485791 |
| MAML1    | 0.224717 | 1.168548 | 6.814304 | 6.160341 | 2.63E-08 | 1.10E-07 | 8.484723 |
| NEIL1    | -0.21715 | 0.860261 | 5.921899 | -6.1596  | 2.64E-08 | 1.10E-07 | 8.481612 |
| UBA6     | 0.297187 | 1.228746 | 5.473924 | 6.159289 | 2.65E-08 | 1.10E-07 | 8.480291 |
| LSP1     | 0.332708 | 1.259375 | 5.303544 | 6.159185 | 2.65E-08 | 1.10E-07 | 8.479853 |
| PIGP     | -0.26538 | 0.831982 | 9.240886 | -6.15754 | 2.67E-08 | 1.11E-07 | 8.4729   |
| ZMAT3    | 0.261653 | 1.198852 | 6.537342 | 6.155541 | 2.69E-08 | 1.12E-07 | 8.464495 |
| CDCP1    | 0.265758 | 1.202267 | 4.891013 | 6.155401 | 2.69E-08 | 1.12E-07 | 8.463903 |
| PIP4K2A  | 0.271976 | 1.207461 | 6.837089 | 6.155034 | 2.70E-08 | 1.12E-07 | 8.462359 |
| GZMB     | 0.763188 | 1.697237 | 4.402278 | 6.154408 | 2.70E-08 | 1.12E-07 | 8.459721 |
| ZNF292   | 0.305408 | 1.235768 | 5.948228 | 6.154289 | 2.70E-08 | 1.12E-07 | 8.45922  |
| VWF      | 0.478366 | 1.393165 | 5.777215 | 6.15113  | 2.74E-08 | 1.14E-07 | 8.445906 |
| CAST     | 0.284282 | 1.217804 | 8.70962  | 6.149842 | 2.76E-08 | 1.14E-07 | 8.440479 |
| CELF3    | -0.23326 | 0.85071  | 6.205823 | -6.14568 | 2.81E-08 | 1.17E-07 | 8.422962 |
| RSU1     | 0.35888  | 1.28243  | 7.298608 | 6.144343 | 2.82E-08 | 1.17E-07 | 8.41732  |
| VEZF1    | 0.27392  | 1.209088 | 7.758987 | 6.143181 | 2.84E-08 | 1.18E-07 | 8.412423 |
| BAZ2B    | 0.308142 | 1.238112 | 6.717848 | 6.142727 | 2.84E-08 | 1.18E-07 | 8.410512 |
| MILR1    | 0.332628 | 1.259306 | 4.121772 | 6.139598 | 2.88E-08 | 1.19E-07 | 8.397338 |
| PLCL1    | -0.69916 | 0.615932 | 7.203165 | -6.13957 | 2.88E-08 | 1.19E-07 | 8.397233 |
| INADL    | -0.23425 | 0.850127 | 4.673671 | -6.13956 | 2.88E-08 | 1.19E-07 | 8.397191 |
| SEC31A   | -0.24625 | 0.843084 | 9.581266 | -6.1374  | 2.91E-08 | 1.20E-07 | 8.38808  |
| EFNA4    | 0.372286 | 1.294402 | 5.527468 | 6.136773 | 2.92E-08 | 1.21E-07 | 8.385445 |
| ATP5D    | -0.28089 | 0.823083 | 7.798101 | -6.13613 | 2.92E-08 | 1.21E-07 | 8.382753 |
| TBXAS1   | 0.389934 | 1.310334 | 5.288101 | 6.136105 | 2.92E-08 | 1.21E-07 | 8.382631 |
| INPP4B   | 0.35614  | 1.279996 | 4.270506 | 6.135014 | 2.94E-08 | 1.21E-07 | 8.378041 |
| DNAJB5   | -0.37343 | 0.771947 | 5.385316 | -6.13365 | 2.95E-08 | 1.22E-07 | 8.372314 |
| GNAI2    | 0.294545 | 1.226498 | 7.533038 | 6.133253 | 2.96E-08 | 1.22E-07 | 8.370629 |
| FAM65B   | 0.354183 | 1.278262 | 4.511646 | 6.126373 | 3.05E-08 | 1.26E-07 | 8.341677 |
| PILRA    | 0.296713 | 1.228342 | 4.833291 | 6.126366 | 3.05E-08 | 1.26E-07 | 8.341647 |
| CTDP1    | -0.24537 | 0.8436   | 6.277722 | -6.12239 | 3.10E-08 | 1.28E-07 | 8.32494  |
| SUV420H1 | 0.38581  | 1.306593 | 7.088987 | 6.121296 | 3.12E-08 | 1.28E-07 | 8.320323 |
| IL2RG    | 0.576746 | 1.491481 | 6.132658 | 6.120564 | 3.13E-08 | 1.29E-07 | 8.317245 |
| SPAST    | 0.237134 | 1.178649 | 4.861013 | 6.120458 | 3.13E-08 | 1.29E-07 | 8.3168   |
| BACH2    | 0.22025  | 1.164936 | 4.244177 | 6.120033 | 3.13E-08 | 1.29E-07 | 8.315011 |
| EIF4EBP2 | -0.24371 | 0.844571 | 7.444937 | -6.11964 | 3.14E-08 | 1.29E-07 | 8.313365 |
| CAP2     | 0.437945 | 1.354673 | 6.917722 | 6.119474 | 3.14E-08 | 1.29E-07 | 8.31266  |
| FCGRT    | -0.3584  | 0.78003  | 9.490506 | -6.11683 | 3.18E-08 | 1.30E-07 | 8.301523 |
| LONRF3   | -0.40729 | 0.754041 | 5.642911 | -6.11597 | 3.19E-08 | 1.31E-07 | 8.29793  |
| ZNF638   | 0.306456 | 1.236666 | 8.036709 | 6.11321  | 3.23E-08 | 1.32E-07 | 8.286322 |
| GBP1     | 0.77307  | 1.708902 | 6.393797 | 6.109566 | 3.28E-08 | 1.34E-07 | 8.271008 |
| TARS     | 0.274578 | 1.209641 | 8.097089 | 6.108628 | 3.29E-08 | 1.35E-07 | 8.267066 |
| C9orf78  | -0.22265 | 0.856987 | 7.760253 | -6.10413 | 3.35E-08 | 1.37E-07 | 8.248178 |
| EZH2     | 0.3639   | 1.2869   | 4.141139 | 6.102954 | 3.37E-08 | 1.38E-07 | 8.243221 |
| MAPK8    | -0.26536 | 0.831994 | 6.156329 | -6.10161 | 3.39E-08 | 1.39E-07 | 8.237585 |

|           |          |          |          |          |          |          |          |
|-----------|----------|----------|----------|----------|----------|----------|----------|
| SEMA4C    | 0.236864 | 1.178429 | 7.023291 | 6.101421 | 3.39E-08 | 1.39E-07 | 8.236784 |
| COL16A1   | 0.526805 | 1.440735 | 5.198101 | 6.101357 | 3.39E-08 | 1.39E-07 | 8.236511 |
| TFDP2     | -0.24194 | 0.845609 | 7.366329 | -6.09882 | 3.43E-08 | 1.40E-07 | 8.225867 |
| BBOX1     | -0.57518 | 0.671203 | 11.60582 | -6.09408 | 3.50E-08 | 1.43E-07 | 8.205934 |
| CD59      | 0.29585  | 1.227608 | 10.48228 | 6.094038 | 3.50E-08 | 1.43E-07 | 8.205777 |
| COPS7A    | -0.23655 | 0.84877  | 8.135316 | -6.09391 | 3.50E-08 | 1.43E-07 | 8.205249 |
| FZD2      | 0.319137 | 1.247584 | 4.682658 | 6.093425 | 3.51E-08 | 1.43E-07 | 8.203202 |
| RPL39L    | 0.301186 | 1.232157 | 4.471899 | 6.093253 | 3.51E-08 | 1.43E-07 | 8.202477 |
| BACE1     | -0.22352 | 0.856471 | 6.730759 | -6.09304 | 3.52E-08 | 1.43E-07 | 8.201585 |
| ADNP      | 0.329743 | 1.25679  | 7.857089 | 6.091921 | 3.53E-08 | 1.44E-07 | 8.196885 |
| S100A9    | 0.97552  | 1.96635  | 5.372278 | 6.091099 | 3.55E-08 | 1.44E-07 | 8.193438 |
| PAQR5     | -0.39138 | 0.762398 | 6.926076 | -6.09042 | 3.56E-08 | 1.45E-07 | 8.19057  |
| CLIC5     | -0.71069 | 0.611027 | 6.492911 | -6.08674 | 3.61E-08 | 1.47E-07 | 8.175157 |
| GCA       | 0.346713 | 1.27166  | 6.134177 | 6.086605 | 3.62E-08 | 1.47E-07 | 8.17457  |
| SEC24D    | 0.329256 | 1.256365 | 4.179494 | 6.085094 | 3.64E-08 | 1.48E-07 | 8.168228 |
| RECK      | 0.390395 | 1.310752 | 5.121772 | 6.084613 | 3.65E-08 | 1.48E-07 | 8.166214 |
| CDH9      | -0.26129 | 0.834341 | 5.329114 | -6.07373 | 3.82E-08 | 1.55E-07 | 8.120555 |
| PLCH2     | -0.362   | 0.778084 | 5.521392 | -6.07014 | 3.88E-08 | 1.57E-07 | 8.105523 |
| INHA      | -0.25496 | 0.83801  | 4.589367 | -6.06905 | 3.90E-08 | 1.58E-07 | 8.100936 |
| RPARP-AS1 | -0.34248 | 0.788682 | 5.590633 | -6.0627  | 4.01E-08 | 1.62E-07 | 8.074328 |
| DGAT1     | -0.24043 | 0.846494 | 6.658481 | -6.05837 | 4.08E-08 | 1.65E-07 | 8.056187 |
| HIRIP3    | -0.21383 | 0.862247 | 7.37481  | -6.05759 | 4.09E-08 | 1.66E-07 | 8.052903 |
| CLCN7     | -0.19773 | 0.871923 | 7.102405 | -6.05628 | 4.12E-08 | 1.67E-07 | 8.04743  |
| MIF       | -0.25006 | 0.840862 | 11.73924 | -6.05396 | 4.16E-08 | 1.68E-07 | 8.0377   |
| NDNF      | -1.1043  | 0.46513  | 6.630886 | -6.04868 | 4.25E-08 | 1.72E-07 | 8.015576 |
| CXorf21   | 0.349335 | 1.273973 | 3.82962  | 6.047985 | 4.27E-08 | 1.72E-07 | 8.012675 |
| SRD5A2    | -0.24966 | 0.841096 | 5.386582 | -6.04686 | 4.29E-08 | 1.73E-07 | 8.007975 |
| MT1X      | -1.02463 | 0.491536 | 11.62177 | -6.04606 | 4.30E-08 | 1.74E-07 | 8.004604 |
| WIP1      | -0.43675 | 0.738799 | 8.065823 | -6.04554 | 4.31E-08 | 1.74E-07 | 8.002444 |
| THOC1     | 0.238327 | 1.179624 | 7.356076 | 6.044858 | 4.32E-08 | 1.74E-07 | 7.999584 |
| FUS       | 0.277339 | 1.211957 | 7.280633 | 6.042219 | 4.37E-08 | 1.76E-07 | 7.988534 |
| DMXL1     | -0.5793  | 0.669291 | 8.17519  | -6.03924 | 4.43E-08 | 1.78E-07 | 7.976063 |
| ERAP1     | 0.270059 | 1.205857 | 5.179114 | 6.038872 | 4.44E-08 | 1.79E-07 | 7.974528 |
| CD1C      | 0.594526 | 1.509976 | 6.472911 | 6.038384 | 4.44E-08 | 1.79E-07 | 7.972486 |
| DDAH1     | -0.24235 | 0.845366 | 11.00203 | -6.03682 | 4.47E-08 | 1.80E-07 | 7.96595  |
| ZWILCH    | 0.281581 | 1.215526 | 4.762405 | 6.036229 | 4.49E-08 | 1.80E-07 | 7.963467 |
| NUP107    | 0.310547 | 1.240178 | 7.573418 | 6.033228 | 4.54E-08 | 1.83E-07 | 7.950914 |
| ING2      | -0.30795 | 0.807788 | 6.798101 | -6.0319  | 4.57E-08 | 1.84E-07 | 7.945369 |
| ZZZ3      | 0.39193  | 1.312148 | 7.087848 | 6.031608 | 4.58E-08 | 1.84E-07 | 7.944139 |
| NR1I3     | -0.71414 | 0.60957  | 5.127342 | -6.03136 | 4.58E-08 | 1.84E-07 | 7.943118 |
| NPPA      | -0.30691 | 0.808371 | 6.088101 | -6.03117 | 4.58E-08 | 1.84E-07 | 7.942317 |
| OAS2      | 0.480968 | 1.39568  | 5.107215 | 6.029294 | 4.62E-08 | 1.85E-07 | 7.934458 |
| NR2F6     | -0.21582 | 0.861058 | 6.573544 | -6.02815 | 4.64E-08 | 1.86E-07 | 7.929679 |
| GALNT10   | 0.253689 | 1.192252 | 6.143797 | 6.027192 | 4.66E-08 | 1.87E-07 | 7.925667 |
| CETN3     | 0.422866 | 1.340588 | 7.424684 | 6.025647 | 4.69E-08 | 1.88E-07 | 7.919208 |
| PCBD1     | -0.42728 | 0.743663 | 9.173038 | -6.02467 | 4.71E-08 | 1.89E-07 | 7.915137 |
| RRM1      | 0.264809 | 1.201477 | 6.539747 | 6.023025 | 4.75E-08 | 1.90E-07 | 7.908247 |

|           |          |          |          |          |          |          |          |
|-----------|----------|----------|----------|----------|----------|----------|----------|
| ELOVL6    | 0.323202 | 1.251104 | 5.245443 | 6.021663 | 4.77E-08 | 1.91E-07 | 7.90255  |
| PIGN      | 0.265092 | 1.201713 | 5.93443  | 6.019242 | 4.82E-08 | 1.93E-07 | 7.892434 |
| COX7B     | -0.27716 | 0.825213 | 11.31835 | -6.01798 | 4.85E-08 | 1.94E-07 | 7.887163 |
| CSHL1     | -0.33302 | 0.793871 | 5.429367 | -6.01592 | 4.89E-08 | 1.95E-07 | 7.878532 |
| ERMP1     | 0.420711 | 1.338588 | 8.451392 | 6.0137   | 4.94E-08 | 1.97E-07 | 7.869272 |
| USP1      | 0.283913 | 1.217493 | 7.234684 | 6.009309 | 5.03E-08 | 2.01E-07 | 7.850928 |
| CEBPA-AS1 | -0.29616 | 0.814418 | 6.489114 | -6.00644 | 5.09E-08 | 2.03E-07 | 7.838948 |
| HMX1      | -0.31927 | 0.801476 | 6.437722 | -6.00348 | 5.16E-08 | 2.06E-07 | 7.826566 |
| ECHDC1    | -0.34834 | 0.785487 | 8.951013 | -6.00321 | 5.17E-08 | 2.06E-07 | 7.825441 |
| NMT2      | 0.439631 | 1.356257 | 5.968861 | 6.001327 | 5.21E-08 | 2.07E-07 | 7.817595 |
| SERPINB9  | 0.491805 | 1.406203 | 5.658481 | 6.000899 | 5.22E-08 | 2.08E-07 | 7.81581  |
| PHF1      | -0.19834 | 0.871553 | 8.313671 | -6.00069 | 5.22E-08 | 2.08E-07 | 7.81493  |
| POGLUT1   | 0.266542 | 1.202921 | 6.580253 | 5.994235 | 5.37E-08 | 2.13E-07 | 7.787995 |
| MAT2A     | -0.56788 | 0.674608 | 7.632785 | -5.98922 | 5.48E-08 | 2.18E-07 | 7.767088 |
| IFI44L    | 1.324275 | 2.504071 | 5.99557  | 5.989014 | 5.49E-08 | 2.18E-07 | 7.766213 |
| C18orf8   | -0.3275  | 0.796914 | 7.106456 | -5.98739 | 5.53E-08 | 2.19E-07 | 7.759455 |
| SKAP2     | 0.284539 | 1.218021 | 7.26038  | 5.98722  | 5.53E-08 | 2.19E-07 | 7.758727 |
| HADHA     | -0.18715 | 0.878337 | 9.39443  | -5.98561 | 5.57E-08 | 2.21E-07 | 7.752003 |
| TRIM24    | 0.331212 | 1.25807  | 6.118354 | 5.984853 | 5.59E-08 | 2.22E-07 | 7.748857 |
| APBB1     | -0.25187 | 0.839807 | 5.746962 | -5.9837  | 5.61E-08 | 2.22E-07 | 7.744048 |
| NPHS2     | -1.26985 | 0.414703 | 8.474557 | -5.98218 | 5.65E-08 | 2.24E-07 | 7.737695 |
| HMGXB4    | 0.224756 | 1.16858  | 6.47519  | 5.981578 | 5.66E-08 | 2.24E-07 | 7.735201 |
| RALGDS    | 0.23442  | 1.176434 | 6.006835 | 5.980461 | 5.69E-08 | 2.25E-07 | 7.730541 |
| HOXB1     | -0.32958 | 0.795765 | 5.816456 | -5.98026 | 5.70E-08 | 2.25E-07 | 7.729703 |
| IFI6      | 1.239545 | 2.361241 | 8.112785 | 5.980195 | 5.70E-08 | 2.25E-07 | 7.729431 |
| LRRC1     | 0.395968 | 1.315826 | 7.526709 | 5.978731 | 5.73E-08 | 2.27E-07 | 7.723328 |
| ID3       | 0.580982 | 1.495867 | 6.665949 | 5.977402 | 5.77E-08 | 2.28E-07 | 7.71779  |
| PSMD1     | 0.199592 | 1.148373 | 8.667722 | 5.975551 | 5.81E-08 | 2.29E-07 | 7.710074 |
| PCOLCE2   | -1.008   | 0.497236 | 5.676329 | -5.97523 | 5.82E-08 | 2.30E-07 | 7.708737 |
| FOXN1     | -0.21466 | 0.861751 | 4.896203 | -5.97278 | 5.88E-08 | 2.32E-07 | 7.698526 |
| PRKAG2    | -0.34682 | 0.786316 | 7.220127 | -5.97261 | 5.89E-08 | 2.32E-07 | 7.697806 |
| TLR8      | 0.392009 | 1.31222  | 4.29962  | 5.970005 | 5.95E-08 | 2.35E-07 | 7.68696  |
| TRA2B     | 0.216621 | 1.162008 | 6.541139 | 5.968152 | 6.00E-08 | 2.36E-07 | 7.679241 |
| POLE2     | 0.354045 | 1.278139 | 4.963544 | 5.965899 | 6.06E-08 | 2.38E-07 | 7.669856 |
| IRF2      | 0.259987 | 1.197468 | 6.331646 | 5.963197 | 6.13E-08 | 2.41E-07 | 7.6586   |
| HECW1     | -0.28411 | 0.821248 | 4.870886 | -5.963   | 6.13E-08 | 2.41E-07 | 7.657768 |
| VWA8      | -0.3554  | 0.781655 | 7.277848 | -5.95642 | 6.31E-08 | 2.48E-07 | 7.630384 |
| ANKRD6    | 0.26807  | 1.204196 | 5.407848 | 5.956129 | 6.31E-08 | 2.48E-07 | 7.629171 |
| ZCCHC14   | -0.21063 | 0.864162 | 5.926582 | -5.95601 | 6.32E-08 | 2.48E-07 | 7.628695 |
| POLR1E    | 0.301601 | 1.232511 | 6.336203 | 5.95254  | 6.41E-08 | 2.52E-07 | 7.614236 |
| UBE2J1    | 0.312451 | 1.241815 | 6.45443  | 5.952194 | 6.42E-08 | 2.52E-07 | 7.612796 |
| RPP40     | 0.294901 | 1.226801 | 6.591013 | 5.951715 | 6.43E-08 | 2.52E-07 | 7.610803 |
| PDGFRA    | 0.591225 | 1.506526 | 7.013924 | 5.950182 | 6.47E-08 | 2.54E-07 | 7.60442  |
| PCDH17    | 0.364539 | 1.28747  | 5.283797 | 5.949738 | 6.49E-08 | 2.54E-07 | 7.602574 |
| PGRMC1    | -0.31347 | 0.804707 | 10.93949 | -5.946   | 6.59E-08 | 2.58E-07 | 7.587041 |
| CASP8     | 0.246897 | 1.186652 | 5.839873 | 5.940374 | 6.75E-08 | 2.64E-07 | 7.563622 |
| DMTN      | -0.22946 | 0.852954 | 7.169367 | -5.93968 | 6.77E-08 | 2.65E-07 | 7.560727 |

|         |          |          |          |          |          |          |          |
|---------|----------|----------|----------|----------|----------|----------|----------|
| PBK     | 0.484104 | 1.398717 | 3.824177 | 5.93308  | 6.96E-08 | 2.72E-07 | 7.533298 |
| ELF4    | 0.335296 | 1.261637 | 5.486582 | 5.932674 | 6.98E-08 | 2.73E-07 | 7.531609 |
| GFPT1   | 0.340336 | 1.266051 | 7.374557 | 5.93255  | 6.98E-08 | 2.73E-07 | 7.531093 |
| SLC2A11 | -0.23207 | 0.851413 | 5.170886 | -5.93232 | 6.99E-08 | 2.73E-07 | 7.530159 |
| NOL8    | 0.327833 | 1.255126 | 6.817595 | 5.931632 | 7.01E-08 | 2.74E-07 | 7.527279 |
| PLEKHA6 | -0.27866 | 0.824355 | 6.414684 | -5.92855 | 7.10E-08 | 2.77E-07 | 7.514492 |
| SEMA4D  | 0.383241 | 1.304269 | 6.981392 | 5.928234 | 7.11E-08 | 2.77E-07 | 7.513157 |
| PFKFB3  | 0.774137 | 1.710167 | 8.147722 | 5.928048 | 7.11E-08 | 2.77E-07 | 7.512386 |
| GGA2    | -0.20295 | 0.868772 | 7.176962 | -5.92721 | 7.14E-08 | 2.78E-07 | 7.508894 |
| GMDS    | 0.282022 | 1.215898 | 6.050633 | 5.926233 | 7.17E-08 | 2.79E-07 | 7.504846 |
| CRISP2  | -0.36556 | 0.776168 | 4.181646 | -5.92418 | 7.23E-08 | 2.82E-07 | 7.49632  |
| COL18A1 | 0.396225 | 1.31606  | 7.657468 | 5.923592 | 7.25E-08 | 2.82E-07 | 7.493873 |
| TGM5    | -0.26539 | 0.831975 | 6.193924 | -5.92354 | 7.25E-08 | 2.82E-07 | 7.493657 |
| XYLT2   | 0.275145 | 1.210116 | 6.076456 | 5.922684 | 7.28E-08 | 2.83E-07 | 7.490101 |
| PSAT1   | -0.6467  | 0.63874  | 9.567468 | -5.92179 | 7.31E-08 | 2.84E-07 | 7.486407 |
| SLC38A6 | -0.48579 | 0.714106 | 5.944684 | -5.92105 | 7.33E-08 | 2.85E-07 | 7.483299 |
| AGO1    | -0.20489 | 0.867602 | 6.735063 | -5.91925 | 7.38E-08 | 2.87E-07 | 7.475819 |
| HSF4    | -0.29924 | 0.812683 | 6.578481 | -5.9166  | 7.47E-08 | 2.90E-07 | 7.464826 |
| MCM7    | 0.193689 | 1.143684 | 6.388734 | 5.913095 | 7.58E-08 | 2.94E-07 | 7.450285 |
| KRT7    | 0.70946  | 1.635192 | 6.391139 | 5.912811 | 7.59E-08 | 2.94E-07 | 7.449106 |
| ZNF646  | -0.27609 | 0.825828 | 5.340759 | -5.91256 | 7.60E-08 | 2.94E-07 | 7.44805  |
| QARS    | 0.243676 | 1.184006 | 9.372658 | 5.911909 | 7.62E-08 | 2.95E-07 | 7.445362 |
| EIF5    | -0.2281  | 0.853761 | 8.754937 | -5.90806 | 7.74E-08 | 3.00E-07 | 7.429389 |
| PSD3    | 0.340204 | 1.265936 | 4.504937 | 5.906671 | 7.79E-08 | 3.02E-07 | 7.423626 |
| DVL1    | -0.21697 | 0.860371 | 6.349367 | -5.90539 | 7.83E-08 | 3.03E-07 | 7.418328 |
| NBEA    | 0.35058  | 1.275073 | 5.492532 | 5.905148 | 7.84E-08 | 3.03E-07 | 7.417307 |
| PRKD1   | 0.408472 | 1.327279 | 6.713671 | 5.90455  | 7.86E-08 | 3.04E-07 | 7.414825 |
| PIGG    | 0.290744 | 1.223271 | 6.999494 | 5.904232 | 7.87E-08 | 3.04E-07 | 7.413506 |
| PRX     | -0.27692 | 0.825353 | 6.272152 | -5.90374 | 7.89E-08 | 3.05E-07 | 7.41146  |
| SLC38A1 | 0.523702 | 1.43764  | 7.613544 | 5.902941 | 7.91E-08 | 3.05E-07 | 7.408151 |
| ZFAND1  | -0.32984 | 0.795627 | 7.744177 | -5.89882 | 8.05E-08 | 3.11E-07 | 7.391077 |
| ADAM17  | 0.239216 | 1.180351 | 5.021013 | 5.89668  | 8.13E-08 | 3.13E-07 | 7.382182 |
| TFEC    | -0.4859  | 0.714054 | 7.258987 | -5.89599 | 8.15E-08 | 3.14E-07 | 7.379318 |
| DIMT1   | 0.215046 | 1.160741 | 7.084177 | 5.889706 | 8.37E-08 | 3.23E-07 | 7.353275 |
| TRIL    | 0.381686 | 1.302864 | 5.799873 | 5.888602 | 8.41E-08 | 3.24E-07 | 7.348699 |
| ZNF787  | -0.267   | 0.831044 | 5.466076 | -5.88856 | 8.41E-08 | 3.24E-07 | 7.34851  |
| NUCB2   | 0.384097 | 1.305043 | 6.823924 | 5.886338 | 8.49E-08 | 3.27E-07 | 7.339315 |
| PRKX    | 0.493037 | 1.407404 | 4.92443  | 5.881814 | 8.66E-08 | 3.33E-07 | 7.320573 |
| CCR7    | 0.453123 | 1.369    | 4.497975 | 5.880002 | 8.72E-08 | 3.35E-07 | 7.31307  |
| QTRT1   | -0.25292 | 0.839193 | 6.96     | -5.87923 | 8.75E-08 | 3.36E-07 | 7.309861 |
| CRYBG3  | 0.222497 | 1.166751 | 7.156203 | 5.875664 | 8.88E-08 | 3.41E-07 | 7.295104 |
| CACNB3  | 0.228841 | 1.171893 | 5.473418 | 5.869819 | 9.11E-08 | 3.50E-07 | 7.270907 |
| SCAND1  | -0.22471 | 0.855767 | 8.704177 | -5.86868 | 9.15E-08 | 3.51E-07 | 7.266186 |
| MFSD1   | 0.264091 | 1.200879 | 9.515316 | 5.865388 | 9.28E-08 | 3.56E-07 | 7.252571 |
| NKX2-5  | -0.23091 | 0.852098 | 5.203544 | -5.86348 | 9.35E-08 | 3.59E-07 | 7.244663 |
| PLS3    | 0.31587  | 1.244762 | 9.936076 | 5.863369 | 9.36E-08 | 3.59E-07 | 7.244215 |
| TRBC1   | 0.976331 | 1.967455 | 6.875443 | 5.861251 | 9.44E-08 | 3.62E-07 | 7.235455 |

|           |          |          |          |          |          |          |          |
|-----------|----------|----------|----------|----------|----------|----------|----------|
| PEMT      | -0.51422 | 0.700173 | 7.709114 | -5.86017 | 9.49E-08 | 3.63E-07 | 7.230989 |
| FASTKD3   | -0.40895 | 0.75317  | 7.287215 | -5.85969 | 9.51E-08 | 3.64E-07 | 7.229017 |
| MLLT11    | 0.339868 | 1.265641 | 5.772405 | 5.85935  | 9.52E-08 | 3.64E-07 | 7.22759  |
| ZXDC      | -0.20783 | 0.865837 | 6.442532 | -5.8588  | 9.54E-08 | 3.65E-07 | 7.225335 |
| PDLIM4    | 0.239447 | 1.18054  | 4.597848 | 5.855979 | 9.66E-08 | 3.69E-07 | 7.213652 |
| TTLL7     | 0.375211 | 1.297029 | 4.713038 | 5.855741 | 9.67E-08 | 3.69E-07 | 7.212666 |
| MT1F      | -0.66308 | 0.63153  | 12.14367 | -5.85424 | 9.73E-08 | 3.71E-07 | 7.206449 |
| P2RY13    | 0.522899 | 1.436839 | 4.528861 | 5.85193  | 9.82E-08 | 3.75E-07 | 7.196912 |
| TTC39A    | 0.857009 | 1.81128  | 6.258861 | 5.846131 | 1.01E-07 | 3.84E-07 | 7.172946 |
| IL33      | 0.471989 | 1.387021 | 3.977595 | 5.846111 | 1.01E-07 | 3.84E-07 | 7.172861 |
| VLDLR     | 0.401364 | 1.320756 | 6.522658 | 5.844195 | 1.01E-07 | 3.87E-07 | 7.164945 |
| ZNF423    | 0.335415 | 1.26174  | 4.669241 | 5.841608 | 1.03E-07 | 3.91E-07 | 7.154256 |
| MRPS33    | -0.23285 | 0.850951 | 9.011646 | -5.84099 | 1.03E-07 | 3.92E-07 | 7.151723 |
| CACNA2D5  | 0.425264 | 1.342818 | 4.531772 | 5.835858 | 1.05E-07 | 4.00E-07 | 7.130509 |
| ACTR1B    | -0.21341 | 0.862495 | 7.809114 | -5.83549 | 1.05E-07 | 4.01E-07 | 7.12899  |
| TNFRSF11F | 0.660033 | 1.580119 | 7.428101 | 5.834567 | 1.06E-07 | 4.02E-07 | 7.12518  |
| LSM4      | -0.26195 | 0.83396  | 8.821013 | -5.83426 | 1.06E-07 | 4.02E-07 | 7.123916 |
| C10orf10  | 0.41915  | 1.33714  | 6.541392 | 5.833904 | 1.06E-07 | 4.03E-07 | 7.12244  |
| SCML1     | -0.31553 | 0.803557 | 5.314937 | -5.83374 | 1.06E-07 | 4.03E-07 | 7.121758 |
| SDHAF3    | -0.27094 | 0.828782 | 5.912911 | -5.8326  | 1.07E-07 | 4.05E-07 | 7.117044 |
| FAM149A   | -0.55646 | 0.679971 | 7.438861 | -5.83126 | 1.07E-07 | 4.07E-07 | 7.111523 |
| UHRF1BP1  | -0.23944 | 0.847074 | 5.310633 | -5.82778 | 1.09E-07 | 4.12E-07 | 7.097165 |
| TBX2      | -0.24655 | 0.842907 | 6.491139 | -5.82775 | 1.09E-07 | 4.12E-07 | 7.097042 |
| C19orf24  | -0.22043 | 0.858311 | 7.336835 | -5.82696 | 1.09E-07 | 4.14E-07 | 7.093758 |
| CDH15     | -0.23361 | 0.850504 | 4.806329 | -5.82612 | 1.10E-07 | 4.15E-07 | 7.090317 |
| SHFM1     | 0.223755 | 1.167769 | 7.056076 | 5.823689 | 1.11E-07 | 4.19E-07 | 7.080282 |
| TNFRSF21  | -0.50026 | 0.706981 | 8.83038  | -5.8231  | 1.11E-07 | 4.20E-07 | 7.077852 |
| UBE2Z     | 0.188656 | 1.139702 | 8.389241 | 5.819363 | 1.13E-07 | 4.26E-07 | 7.062437 |
| MAPK12    | -0.33495 | 0.792809 | 5.63443  | -5.81737 | 1.14E-07 | 4.30E-07 | 7.054228 |
| HOOK2     | -0.26516 | 0.832108 | 8.100759 | -5.81079 | 1.17E-07 | 4.42E-07 | 7.027092 |
| DNAJB1    | -0.77923 | 0.582678 | 9.106456 | -5.80969 | 1.17E-07 | 4.44E-07 | 7.02255  |
| IQSEC3    | -0.25523 | 0.837853 | 5.471646 | -5.80882 | 1.18E-07 | 4.45E-07 | 7.018958 |
| PTPRD     | -0.44946 | 0.732317 | 7.327468 | -5.80776 | 1.18E-07 | 4.47E-07 | 7.01458  |
| BID       | 0.332951 | 1.259587 | 5.987342 | 5.805788 | 1.19E-07 | 4.50E-07 | 7.00647  |
| DTYMK     | 0.269005 | 1.204977 | 6.542152 | 5.804897 | 1.20E-07 | 4.52E-07 | 7.002801 |
| CRYBB3    | -0.35322 | 0.782834 | 5.356582 | -5.80454 | 1.20E-07 | 4.52E-07 | 7.001336 |
| ZC3H7B    | -0.20269 | 0.868926 | 6.647722 | -5.80345 | 1.21E-07 | 4.54E-07 | 6.996844 |
| ORMDL2    | 0.265942 | 1.202421 | 8.468481 | 5.801935 | 1.21E-07 | 4.57E-07 | 6.990597 |
| IFRD1     | -0.43588 | 0.739245 | 5.865316 | -5.80097 | 1.22E-07 | 4.59E-07 | 6.986613 |
| CD58      | 0.31448  | 1.243563 | 7.056582 | 5.800251 | 1.22E-07 | 4.60E-07 | 6.983661 |
| LEPR      | 0.31473  | 1.243779 | 5.138861 | 5.799067 | 1.23E-07 | 4.62E-07 | 6.978784 |
| METRNL    | -0.36136 | 0.778432 | 6.432532 | -5.79821 | 1.23E-07 | 4.63E-07 | 6.975271 |
| NARS2     | -0.29337 | 0.815996 | 7.995063 | -5.79779 | 1.23E-07 | 4.64E-07 | 6.97353  |
| CPNE7     | -0.25115 | 0.840225 | 5.701392 | -5.79658 | 1.24E-07 | 4.66E-07 | 6.968526 |
| MSRB2     | -0.20336 | 0.868526 | 8.551139 | -5.79578 | 1.25E-07 | 4.67E-07 | 6.965237 |
| WT1       | -0.45787 | 0.728063 | 5.695696 | -5.79464 | 1.25E-07 | 4.69E-07 | 6.960539 |
| ZNF146    | 0.269183 | 1.205125 | 7.151139 | 5.794226 | 1.25E-07 | 4.70E-07 | 6.958851 |

|          |          |          |          |          |          |          |          |
|----------|----------|----------|----------|----------|----------|----------|----------|
| PLA2G7   | 0.414552 | 1.332885 | 3.711646 | 5.79337  | 1.26E-07 | 4.72E-07 | 6.955323 |
| CDKL1    | -0.30232 | 0.810948 | 5.699367 | -5.7921  | 1.26E-07 | 4.74E-07 | 6.950103 |
| AQP1     | -0.45176 | 0.731151 | 11.59759 | -5.78839 | 1.28E-07 | 4.81E-07 | 6.934823 |
| SERTAD3  | -0.31655 | 0.802985 | 6.751899 | -5.78643 | 1.30E-07 | 4.85E-07 | 6.926739 |
| PLA2G4A  | 0.617701 | 1.534428 | 4.589114 | 5.786395 | 1.30E-07 | 4.85E-07 | 6.926614 |
| MRPS7    | -0.2476  | 0.842299 | 8.601139 | -5.78599 | 1.30E-07 | 4.85E-07 | 6.924948 |
| ZC3H4    | 0.325856 | 1.253408 | 8.503291 | 5.785563 | 1.30E-07 | 4.86E-07 | 6.92319  |
| FAM50B   | -0.25987 | 0.83516  | 7.682532 | -5.78366 | 1.31E-07 | 4.90E-07 | 6.915342 |
| WBP1L    | 0.31865  | 1.247163 | 8.465063 | 5.780512 | 1.33E-07 | 4.96E-07 | 6.902411 |
| MYO5C    | 0.480455 | 1.395183 | 7.725696 | 5.775182 | 1.36E-07 | 5.07E-07 | 6.880492 |
| ATP6V1B1 | -0.44854 | 0.732782 | 7.136329 | -5.77481 | 1.36E-07 | 5.08E-07 | 6.878972 |
| GPR18    | 0.683808 | 1.606374 | 4.296076 | 5.774179 | 1.36E-07 | 5.09E-07 | 6.87637  |
| UBQLN2   | 0.431304 | 1.348452 | 7.198861 | 5.773863 | 1.37E-07 | 5.09E-07 | 6.875069 |
| FMO4     | -0.69292 | 0.618601 | 9.144684 | -5.77381 | 1.37E-07 | 5.09E-07 | 6.874837 |
| TM9SF4   | -0.2326  | 0.851098 | 7.253924 | -5.77042 | 1.39E-07 | 5.16E-07 | 6.860934 |
| SLC26A1  | -0.222   | 0.857378 | 4.568354 | -5.77033 | 1.39E-07 | 5.16E-07 | 6.860527 |
| DLAT     | -0.34034 | 0.789857 | 7.145443 | -5.76999 | 1.39E-07 | 5.17E-07 | 6.859163 |
| PCGF2    | -0.21609 | 0.860897 | 6.985823 | -5.76895 | 1.39E-07 | 5.19E-07 | 6.854871 |
| NFIL3    | -0.61675 | 0.65214  | 8.050633 | -5.76853 | 1.40E-07 | 5.19E-07 | 6.853146 |
| C7       | 0.791094 | 1.730386 | 9.697848 | 5.768171 | 1.40E-07 | 5.20E-07 | 6.851675 |
| TTC13    | 0.207754 | 1.154889 | 5.465696 | 5.766254 | 1.41E-07 | 5.24E-07 | 6.843797 |
| BAG5     | 0.237879 | 1.179258 | 7.379367 | 5.76522  | 1.42E-07 | 5.26E-07 | 6.839546 |
| TRDC     | 0.258788 | 1.196473 | 4.398101 | 5.764992 | 1.42E-07 | 5.26E-07 | 6.838609 |
| ANAPC15  | -0.20183 | 0.869446 | 7.708734 | -5.76305 | 1.43E-07 | 5.30E-07 | 6.830646 |
| PLEKHF2  | -0.35834 | 0.780062 | 7.986835 | -5.7619  | 1.44E-07 | 5.33E-07 | 6.825919 |
| GAS2     | -0.63684 | 0.643118 | 6.025063 | -5.76182 | 1.44E-07 | 5.33E-07 | 6.825579 |
| MAPK1IP1 | -0.19882 | 0.871262 | 8.554557 | -5.76026 | 1.45E-07 | 5.36E-07 | 6.819175 |
| PRR36    | -0.29379 | 0.815754 | 5.763797 | -5.75961 | 1.45E-07 | 5.37E-07 | 6.816497 |
| ALKBH4   | -0.2348  | 0.849801 | 5.451266 | -5.75822 | 1.46E-07 | 5.40E-07 | 6.810806 |
| SASH3    | 0.438801 | 1.355477 | 5.500253 | 5.755409 | 1.48E-07 | 5.46E-07 | 6.799252 |
| IGHV1-2  | 1.040679 | 2.057195 | 4.547975 | 5.754107 | 1.48E-07 | 5.49E-07 | 6.793905 |
| RAB40B   | -0.37075 | 0.77338  | 8.288608 | -5.75039 | 1.51E-07 | 5.57E-07 | 6.778651 |
| GPATCH3  | -0.24271 | 0.845154 | 6.48557  | -5.74926 | 1.51E-07 | 5.60E-07 | 6.774011 |
| COX11    | -0.22158 | 0.857625 | 7.922658 | -5.74318 | 1.55E-07 | 5.74E-07 | 6.749055 |
| METTL9   | -0.20735 | 0.866126 | 10.22165 | -5.74244 | 1.56E-07 | 5.76E-07 | 6.746019 |
| WNT10B   | -0.37497 | 0.771123 | 6.650759 | -5.74182 | 1.56E-07 | 5.77E-07 | 6.74349  |
| CTSF     | -0.24059 | 0.846397 | 8.126456 | -5.74128 | 1.57E-07 | 5.78E-07 | 6.741251 |
| CLCN3    | 0.307273 | 1.237366 | 7.648354 | 5.740148 | 1.57E-07 | 5.80E-07 | 6.736629 |
| CCNB1    | 0.415375 | 1.333646 | 4.931772 | 5.739694 | 1.58E-07 | 5.81E-07 | 6.734765 |
| ITGA2    | 0.431838 | 1.348951 | 7.655823 | 5.737902 | 1.59E-07 | 5.85E-07 | 6.727418 |
| SLC2A9   | -0.6387  | 0.64229  | 8.753418 | -5.73651 | 1.60E-07 | 5.88E-07 | 6.721726 |
| EPN1     | -0.30111 | 0.811626 | 6.341392 | -5.73351 | 1.62E-07 | 5.95E-07 | 6.70943  |
| PPFIBP1  | 0.447661 | 1.363828 | 5.437215 | 5.733491 | 1.62E-07 | 5.95E-07 | 6.709331 |
| STAT3    | 0.301686 | 1.232584 | 8.816456 | 5.732453 | 1.63E-07 | 5.98E-07 | 6.705077 |
| KIR3DL2  | -0.26016 | 0.834993 | 4.999367 | -5.73182 | 1.63E-07 | 5.99E-07 | 6.702482 |
| PDIA5    | 0.388281 | 1.308833 | 7.219367 | 5.730402 | 1.64E-07 | 6.02E-07 | 6.696672 |
| CACNA1F  | -0.24475 | 0.843962 | 5.734937 | -5.72981 | 1.64E-07 | 6.04E-07 | 6.69424  |

|           |          |          |          |          |          |          |          |
|-----------|----------|----------|----------|----------|----------|----------|----------|
| ATP1A3    | -0.17358 | 0.886642 | 4.273797 | -5.72927 | 1.65E-07 | 6.05E-07 | 6.69203  |
| HOXB6     | 0.411838 | 1.33038  | 6.447468 | 5.727832 | 1.66E-07 | 6.08E-07 | 6.686137 |
| SOCS7     | -0.19484 | 0.873669 | 5.097089 | -5.72748 | 1.66E-07 | 6.09E-07 | 6.684679 |
| NR1H2     | -0.22316 | 0.85669  | 6.695696 | -5.72673 | 1.66E-07 | 6.11E-07 | 6.681604 |
| POR       | -0.44301 | 0.735598 | 7.53038  | -5.72577 | 1.67E-07 | 6.13E-07 | 6.677686 |
| EVL       | 0.357134 | 1.280879 | 6.241139 | 5.722354 | 1.70E-07 | 6.21E-07 | 6.663697 |
| SLC22A18A | -0.44385 | 0.735168 | 7.79481  | -5.7202  | 1.71E-07 | 6.27E-07 | 6.654891 |
| PTPRM     | -0.27182 | 0.828271 | 8.497975 | -5.71944 | 1.72E-07 | 6.28E-07 | 6.651768 |
| NABP2     | -0.19082 | 0.876106 | 5.390506 | -5.71736 | 1.73E-07 | 6.34E-07 | 6.643256 |
| BIRC2     | 0.232411 | 1.174797 | 9.330127 | 5.716666 | 1.74E-07 | 6.35E-07 | 6.640406 |
| NYX       | -0.20929 | 0.864964 | 5.048228 | -5.71506 | 1.75E-07 | 6.39E-07 | 6.633845 |
| GTPBP4    | 0.199769 | 1.148515 | 6.606709 | 5.71495  | 1.75E-07 | 6.39E-07 | 6.633381 |
| SLCO4C1   | -0.44772 | 0.7332   | 6.986456 | -5.71431 | 1.75E-07 | 6.41E-07 | 6.630745 |
| NOS2      | -0.35556 | 0.781566 | 5.835823 | -5.71175 | 1.77E-07 | 6.47E-07 | 6.62027  |
| TUG1      | 0.268669 | 1.204696 | 8.03962  | 5.706345 | 1.81E-07 | 6.62E-07 | 6.598166 |
| ASPSCR1   | -0.40159 | 0.757025 | 5.638987 | -5.70577 | 1.82E-07 | 6.63E-07 | 6.595815 |
| VPS13A    | -0.26521 | 0.832077 | 5.422911 | -5.70464 | 1.83E-07 | 6.66E-07 | 6.591202 |
| ARNT2     | 0.399671 | 1.319207 | 6.543038 | 5.701392 | 1.85E-07 | 6.75E-07 | 6.577903 |
| VAV1      | 0.294578 | 1.226526 | 4.535443 | 5.70124  | 1.85E-07 | 6.75E-07 | 6.577282 |
| BCAP29    | 0.226825 | 1.170256 | 5.778228 | 5.70024  | 1.86E-07 | 6.78E-07 | 6.573196 |
| ZNF574    | -0.22659 | 0.85465  | 6.728608 | -5.69744 | 1.88E-07 | 6.85E-07 | 6.561731 |
| THBS4     | -0.2952  | 0.814961 | 5.397342 | -5.69743 | 1.88E-07 | 6.85E-07 | 6.561686 |
| DRAM1     | 0.348966 | 1.273647 | 8.424684 | 5.697111 | 1.88E-07 | 6.85E-07 | 6.560402 |
| EHBP1     | -0.23344 | 0.850605 | 7.376835 | -5.6971  | 1.88E-07 | 6.85E-07 | 6.560365 |
| SOX13     | -0.23587 | 0.849173 | 6.397342 | -5.69625 | 1.89E-07 | 6.87E-07 | 6.556899 |
| MT1G      | -0.6861  | 0.621532 | 13.48253 | -5.69615 | 1.89E-07 | 6.87E-07 | 6.556463 |
| UGCG      | 0.677062 | 1.59888  | 7.951519 | 5.695228 | 1.90E-07 | 6.90E-07 | 6.5527   |
| COMMD3    | 0.320237 | 1.248536 | 8.988987 | 5.694684 | 1.90E-07 | 6.91E-07 | 6.550479 |
| PEX1      | -0.22895 | 0.853258 | 6.220886 | -5.69344 | 1.91E-07 | 6.94E-07 | 6.545404 |
| F2RL1     | 0.339513 | 1.265329 | 7.92443  | 5.691712 | 1.93E-07 | 6.99E-07 | 6.538334 |
| ITGB8     | 0.328603 | 1.255797 | 4.629873 | 5.68903  | 1.95E-07 | 7.07E-07 | 6.527373 |
| AOX1      | -0.71959 | 0.607269 | 9.415063 | -5.68871 | 1.95E-07 | 7.07E-07 | 6.52605  |
| ZBTB10    | -0.31433 | 0.804222 | 4.89     | -5.68829 | 1.96E-07 | 7.08E-07 | 6.524356 |
| ANKMY2    | 0.348755 | 1.273461 | 8.263291 | 5.684367 | 1.99E-07 | 7.20E-07 | 6.508322 |
| APOO      | -0.29472 | 0.815229 | 9.677975 | -5.68346 | 2.00E-07 | 7.22E-07 | 6.504602 |
| THG1L     | 0.258906 | 1.196571 | 6.200759 | 5.683447 | 2.00E-07 | 7.22E-07 | 6.504565 |
| KNG1      | -0.84228 | 0.557762 | 7.814684 | -5.68009 | 2.02E-07 | 7.32E-07 | 6.490859 |
| WIPF1     | 0.310995 | 1.240563 | 5.450127 | 5.677919 | 2.04E-07 | 7.38E-07 | 6.481994 |
| MTMR14    | -0.22531 | 0.855411 | 7.482405 | -5.67681 | 2.05E-07 | 7.41E-07 | 6.477452 |
| TOM1L2    | -0.21588 | 0.861023 | 6.587215 | -5.67644 | 2.05E-07 | 7.42E-07 | 6.475952 |
| INPP5J    | -0.34123 | 0.789371 | 6.780506 | -5.67607 | 2.06E-07 | 7.43E-07 | 6.474444 |
| SPTLC2    | 0.285804 | 1.219089 | 6.648734 | 5.674879 | 2.07E-07 | 7.46E-07 | 6.469587 |
| GPM6B     | 0.342134 | 1.267631 | 4.639873 | 5.674742 | 2.07E-07 | 7.46E-07 | 6.469027 |
| ATP1B2    | -0.29845 | 0.813128 | 5.876203 | -5.67164 | 2.10E-07 | 7.56E-07 | 6.456349 |
| ELMO1     | 0.284038 | 1.217598 | 4.945823 | 5.670978 | 2.10E-07 | 7.58E-07 | 6.453666 |
| RPP14     | -0.25179 | 0.839853 | 7.478734 | -5.67063 | 2.11E-07 | 7.58E-07 | 6.452239 |
| MICALL2   | 0.428129 | 1.345488 | 5.451013 | 5.669727 | 2.11E-07 | 7.61E-07 | 6.448562 |

|         |          |          |          |          |          |          |          |
|---------|----------|----------|----------|----------|----------|----------|----------|
| HS3ST1  | 0.621831 | 1.538827 | 5.036709 | 5.667884 | 2.13E-07 | 7.66E-07 | 6.441044 |
| PTGER3  | -0.43982 | 0.737229 | 6.943671 | -5.66779 | 2.13E-07 | 7.66E-07 | 6.440661 |
| TIMM23  | -0.22041 | 0.858322 | 7.792278 | -5.66667 | 2.14E-07 | 7.70E-07 | 6.436089 |
| PDSS2   | -0.34774 | 0.785814 | 8.092785 | -5.66561 | 2.15E-07 | 7.73E-07 | 6.431753 |
| IZUMO4  | -0.25891 | 0.835721 | 5.489241 | -5.66339 | 2.17E-07 | 7.80E-07 | 6.422733 |
| NDN     | 0.404157 | 1.323315 | 7.498608 | 5.660494 | 2.20E-07 | 7.89E-07 | 6.410904 |
| MRPL48  | -0.25024 | 0.840754 | 8.551772 | -5.6595  | 2.21E-07 | 7.92E-07 | 6.406865 |
| MAP7D1  | 0.298241 | 1.229644 | 6.500886 | 5.65892  | 2.21E-07 | 7.93E-07 | 6.404488 |
| CORO1C  | 0.320329 | 1.248616 | 8.807722 | 5.654739 | 2.25E-07 | 8.07E-07 | 6.387448 |
| ANK2    | -0.70735 | 0.612443 | 9.032785 | -5.65449 | 2.25E-07 | 8.08E-07 | 6.386432 |
| TRIM5   | 0.27247  | 1.207874 | 4.333165 | 5.654201 | 2.26E-07 | 8.08E-07 | 6.385256 |
| HSD3B2  | -0.25204 | 0.839711 | 4.924937 | -5.65364 | 2.26E-07 | 8.10E-07 | 6.382973 |
| ADAMTS1 | 1.104065 | 2.149595 | 6.942278 | 5.651365 | 2.28E-07 | 8.17E-07 | 6.373699 |
| TXNL4B  | 0.252661 | 1.191403 | 6.630759 | 5.64869  | 2.31E-07 | 8.26E-07 | 6.362804 |
| YARS2   | 0.255758 | 1.193963 | 6.846835 | 5.646727 | 2.33E-07 | 8.32E-07 | 6.354808 |
| PXMP4   | -0.21449 | 0.861853 | 7.046709 | -5.64482 | 2.35E-07 | 8.38E-07 | 6.347054 |
| CALCRL  | 0.289506 | 1.222222 | 6.005063 | 5.644806 | 2.35E-07 | 8.38E-07 | 6.346985 |
| RBM4B   | 0.3      | 1.231144 | 6.895316 | 5.644047 | 2.35E-07 | 8.41E-07 | 6.343891 |
| CAPN3   | -1.03221 | 0.488959 | 8.950127 | -5.63965 | 2.40E-07 | 8.56E-07 | 6.326001 |
| ITM2A   | 0.540402 | 1.454378 | 6.722911 | 5.638862 | 2.40E-07 | 8.58E-07 | 6.322783 |
| GRN     | 0.296601 | 1.228247 | 8.899114 | 5.637711 | 2.42E-07 | 8.62E-07 | 6.3181   |
| ABHD8   | -0.20617 | 0.866838 | 5.118228 | -5.63743 | 2.42E-07 | 8.62E-07 | 6.316969 |
| LIMA1   | 0.282549 | 1.216342 | 8.399114 | 5.637425 | 2.42E-07 | 8.62E-07 | 6.316936 |
| JAM2    | 0.397141 | 1.316896 | 5.486329 | 5.635257 | 2.44E-07 | 8.70E-07 | 6.308115 |
| YOD1    | -0.26113 | 0.834436 | 4.271139 | -5.63394 | 2.45E-07 | 8.74E-07 | 6.302748 |
| ACOT8   | -0.28303 | 0.821863 | 7.381772 | -5.63334 | 2.46E-07 | 8.76E-07 | 6.300304 |
| ZCCHC10 | 0.285501 | 1.218833 | 5.698608 | 5.632873 | 2.46E-07 | 8.77E-07 | 6.298415 |
| ST8SIA4 | 0.310672 | 1.240285 | 3.974557 | 5.631492 | 2.48E-07 | 8.82E-07 | 6.292795 |
| WDR18   | -0.38976 | 0.763255 | 7.152405 | -5.62893 | 2.51E-07 | 8.91E-07 | 6.282373 |
| MT1HL1  | -0.30685 | 0.808404 | 7.65443  | -5.62775 | 2.52E-07 | 8.95E-07 | 6.277589 |
| MEIS2   | 0.67973  | 1.60184  | 6.306329 | 5.62733  | 2.52E-07 | 8.96E-07 | 6.275866 |
| GEMIN6  | -0.21553 | 0.861231 | 7.746709 | -5.62675 | 2.53E-07 | 8.98E-07 | 6.273515 |
| TUT1    | -0.25219 | 0.839623 | 5.789873 | -5.62627 | 2.53E-07 | 9.00E-07 | 6.27155  |
| WVOX    | -0.22978 | 0.852767 | 7.202278 | -5.62567 | 2.54E-07 | 9.02E-07 | 6.269112 |
| CACNB2  | -0.25791 | 0.836301 | 4.978354 | -5.62543 | 2.54E-07 | 9.02E-07 | 6.26813  |
| EXOC1   | 0.31496  | 1.243978 | 8.035696 | 5.625371 | 2.54E-07 | 9.02E-07 | 6.2679   |
| SPAG9   | -0.23146 | 0.851775 | 7.18962  | -5.62358 | 2.56E-07 | 9.08E-07 | 6.260635 |
| IDH1    | -0.49589 | 0.709124 | 11.24329 | -5.6213  | 2.59E-07 | 9.17E-07 | 6.251338 |
| P4HB    | 0.305949 | 1.236231 | 9.793671 | 5.619487 | 2.61E-07 | 9.23E-07 | 6.243981 |
| TMEM127 | 0.210534 | 1.157116 | 7.804684 | 5.614839 | 2.66E-07 | 9.41E-07 | 6.225097 |
| ERCC2   | -0.25967 | 0.835279 | 6.315443 | -5.61363 | 2.67E-07 | 9.45E-07 | 6.220203 |
| TAC1    | 1.140705 | 2.204887 | 4.573671 | 5.609535 | 2.72E-07 | 9.61E-07 | 6.203551 |
| NDUFA7  | -0.22299 | 0.856787 | 8.697722 | -5.60868 | 2.73E-07 | 9.64E-07 | 6.200078 |
| RECQL   | 0.247905 | 1.187482 | 6.067468 | 5.607047 | 2.74E-07 | 9.70E-07 | 6.193448 |
| ZDHHC14 | 0.268906 | 1.204894 | 6.374937 | 5.604129 | 2.78E-07 | 9.82E-07 | 6.181602 |
| NPL     | -0.65974 | 0.632991 | 8.845063 | -5.60291 | 2.79E-07 | 9.86E-07 | 6.176637 |
| NUDT13  | -0.35923 | 0.779581 | 5.031899 | -5.60236 | 2.80E-07 | 9.88E-07 | 6.174418 |



|          |          |          |          |          |          |          |          |
|----------|----------|----------|----------|----------|----------|----------|----------|
| IGSF3    | 0.283874 | 1.217459 | 7.153797 | 5.601666 | 2.81E-07 | 9.90E-07 | 6.171606 |
| FBXW4    | -0.24534 | 0.843615 | 7.721646 | -5.60134 | 2.81E-07 | 9.91E-07 | 6.170296 |
| VNN2     | 0.561765 | 1.476074 | 5.066835 | 5.599806 | 2.83E-07 | 9.97E-07 | 6.164056 |
| TACSTD2  | 0.600514 | 1.516257 | 9.752152 | 5.599597 | 2.83E-07 | 9.98E-07 | 6.163207 |
| NINL     | -0.33264 | 0.794085 | 7.459747 | -5.59899 | 2.84E-07 | 1.00E-06 | 6.160728 |
| COTL1    | -0.6504  | 0.637103 | 9.381139 | -5.59782 | 2.85E-07 | 1.00E-06 | 6.155996 |
| UIMC1    | 0.25332  | 1.191947 | 6.478861 | 5.594719 | 2.89E-07 | 1.02E-06 | 6.143415 |
| BTNL3    | -0.25874 | 0.83582  | 6.469747 | -5.59429 | 2.89E-07 | 1.02E-06 | 6.141668 |
| AIFM1    | -0.36638 | 0.775728 | 9.78     | -5.59326 | 2.91E-07 | 1.02E-06 | 6.137495 |
| GRK5     | 0.233379 | 1.175585 | 5.376835 | 5.59284  | 2.91E-07 | 1.02E-06 | 6.135794 |
| TMEM115  | -0.25858 | 0.835912 | 6.653291 | -5.5911  | 2.93E-07 | 1.03E-06 | 6.128751 |
| CTSD     | 0.378024 | 1.29956  | 8.44443  | 5.590452 | 2.94E-07 | 1.03E-06 | 6.12611  |
| TSTA3    | 0.287095 | 1.220181 | 7.391013 | 5.589872 | 2.95E-07 | 1.03E-06 | 6.123761 |
| PNMA1    | 0.270975 | 1.206623 | 8.437975 | 5.589849 | 2.95E-07 | 1.03E-06 | 6.123666 |
| FOXO1    | -0.27848 | 0.82446  | 7.412152 | -5.58963 | 2.95E-07 | 1.04E-06 | 6.122798 |
| BAX      | 0.426285 | 1.343768 | 6.216329 | 5.589057 | 2.96E-07 | 1.04E-06 | 6.120453 |
| PPA2     | -0.20886 | 0.86522  | 10.06949 | -5.58793 | 2.97E-07 | 1.04E-06 | 6.115871 |
| CA4      | -0.48328 | 0.715349 | 7.525949 | -5.58222 | 3.04E-07 | 1.07E-06 | 6.092758 |
| BCL2A1   | 0.613729 | 1.530209 | 4.045063 | 5.5801   | 3.07E-07 | 1.08E-06 | 6.084151 |
| HBB      | 1.936515 | 3.827799 | 8.793924 | 5.579947 | 3.07E-07 | 1.08E-06 | 6.083531 |
| SLC7A8   | -0.49939 | 0.707404 | 9.291392 | -5.57975 | 3.07E-07 | 1.08E-06 | 6.082737 |
| PPP1R10  | -0.30628 | 0.808725 | 7.092278 | -5.57954 | 3.08E-07 | 1.08E-06 | 6.081863 |
| ADAM9    | 0.465072 | 1.380387 | 8.622532 | 5.578888 | 3.09E-07 | 1.08E-06 | 6.079242 |
| CCNB2    | 0.432016 | 1.349117 | 4.81481  | 5.575223 | 3.13E-07 | 1.10E-06 | 6.064396 |
| PHLDA3   | 0.287253 | 1.220314 | 6.624557 | 5.57479  | 3.14E-07 | 1.10E-06 | 6.06264  |
| WDR3     | 0.244559 | 1.18473  | 6.979114 | 5.574775 | 3.14E-07 | 1.10E-06 | 6.062582 |
| DHRS9    | 0.231653 | 1.17418  | 5.37481  | 5.573147 | 3.16E-07 | 1.10E-06 | 6.055987 |
| KIAA0391 | -0.21445 | 0.861877 | 8.197595 | -5.57112 | 3.19E-07 | 1.11E-06 | 6.047784 |
| HLA-DQA1 | 1.869921 | 3.655126 | 6.609367 | 5.568173 | 3.23E-07 | 1.13E-06 | 6.035851 |
| MTG1     | -0.22702 | 0.8544   | 7.745823 | -5.56561 | 3.26E-07 | 1.14E-06 | 6.025487 |
| SH3BGRL  | 0.269618 | 1.205489 | 9.120886 | 5.562265 | 3.31E-07 | 1.15E-06 | 6.011941 |
| IL18     | 0.439631 | 1.356257 | 5.158861 | 5.55876  | 3.35E-07 | 1.17E-06 | 5.997761 |
| STK39    | 0.387154 | 1.307811 | 5.469114 | 5.558502 | 3.36E-07 | 1.17E-06 | 5.996719 |
| CYP4F2   | -1.10434 | 0.465115 | 8.741519 | -5.55607 | 3.39E-07 | 1.18E-06 | 5.986897 |
| EIF5B    | 0.191686 | 1.142098 | 7.010506 | 5.556019 | 3.39E-07 | 1.18E-06 | 5.986677 |
| PCOLCE   | 0.387701 | 1.308307 | 5.803038 | 5.554532 | 3.41E-07 | 1.19E-06 | 5.980665 |
| TBC1D17  | -0.24481 | 0.843928 | 6.038608 | -5.5496  | 3.48E-07 | 1.21E-06 | 5.96073  |
| DUSP26   | -0.28643 | 0.819929 | 5.18557  | -5.54847 | 3.50E-07 | 1.22E-06 | 5.956175 |
| IGKV1D-8 | 0.573399 | 1.488025 | 4.344304 | 5.547847 | 3.51E-07 | 1.22E-06 | 5.953641 |
| TACR2    | -0.2543  | 0.838393 | 5.367468 | -5.54778 | 3.51E-07 | 1.22E-06 | 5.953375 |
| CCL8     | 0.758887 | 1.692184 | 5.184177 | 5.546338 | 3.53E-07 | 1.23E-06 | 5.947541 |
| CCDC25   | -0.22065 | 0.858177 | 7.648481 | -5.54519 | 3.55E-07 | 1.23E-06 | 5.942891 |
| KIAA0895 | -0.26311 | 0.83329  | 4.958354 | -5.54188 | 3.60E-07 | 1.25E-06 | 5.929526 |
| BAAT     | -0.21455 | 0.861818 | 5.23038  | -5.53552 | 3.69E-07 | 1.28E-06 | 5.903861 |
| REXO2    | -0.26955 | 0.829577 | 10.29392 | -5.53285 | 3.74E-07 | 1.29E-06 | 5.893058 |
| MMP25    | -0.22457 | 0.855853 | 6.020759 | -5.53188 | 3.75E-07 | 1.30E-06 | 5.88916  |
| MTERF4   | -0.1896  | 0.876846 | 5.889494 | -5.53171 | 3.75E-07 | 1.30E-06 | 5.888485 |

|          |          |          |          |          |          |          |          |
|----------|----------|----------|----------|----------|----------|----------|----------|
| SCP2     | -0.2453  | 0.843639 | 9.892532 | -5.53042 | 3.77E-07 | 1.31E-06 | 5.883269 |
| ARAF     | -0.18861 | 0.877451 | 7.050127 | -5.52995 | 3.78E-07 | 1.31E-06 | 5.881376 |
| RPL23    | 0.212885 | 1.159004 | 12.51241 | 5.529343 | 3.79E-07 | 1.31E-06 | 5.878916 |
| SNRNP70  | 0.298393 | 1.229773 | 7.555949 | 5.528898 | 3.80E-07 | 1.31E-06 | 5.877121 |
| LPO      | -0.20928 | 0.864972 | 4.83519  | -5.52627 | 3.84E-07 | 1.33E-06 | 5.866501 |
| TSPAN8   | 1.01361  | 2.018957 | 8.039494 | 5.525955 | 3.84E-07 | 1.33E-06 | 5.865248 |
| CPPED1   | -0.20378 | 0.868272 | 5.738354 | -5.52572 | 3.85E-07 | 1.33E-06 | 5.864305 |
| RAB5C    | -0.24807 | 0.842022 | 8.510506 | -5.52469 | 3.86E-07 | 1.33E-06 | 5.860145 |
| PPCDC    | 0.25195  | 1.190816 | 5.61481  | 5.524179 | 3.87E-07 | 1.34E-06 | 5.858085 |
| RAB6B    | 0.21448  | 1.160285 | 6.11481  | 5.521103 | 3.92E-07 | 1.35E-06 | 5.84568  |
| GOLIM4   | -0.21089 | 0.864004 | 5.877342 | -5.51991 | 3.94E-07 | 1.36E-06 | 5.840847 |
| CDA      | -0.39242 | 0.761848 | 5.716076 | -5.51988 | 3.94E-07 | 1.36E-06 | 5.840755 |
| ID2      | -0.56026 | 0.678181 | 8.765316 | -5.51691 | 3.99E-07 | 1.37E-06 | 5.82877  |
| FAM134B  | -0.45514 | 0.72944  | 9.426835 | -5.5166  | 4.00E-07 | 1.38E-06 | 5.827512 |
| TONSL    | -0.25382 | 0.838672 | 5.086582 | -5.51268 | 4.06E-07 | 1.40E-06 | 5.811715 |
| TMEM59L  | -0.29785 | 0.813466 | 6.007975 | -5.51028 | 4.10E-07 | 1.41E-06 | 5.802035 |
| POLM     | -0.25729 | 0.83666  | 5.36557  | -5.50888 | 4.12E-07 | 1.42E-06 | 5.796426 |
| LILRB2   | 0.309091 | 1.238927 | 3.989114 | 5.507013 | 4.16E-07 | 1.43E-06 | 5.788893 |
| GABARAPI | -0.24011 | 0.84668  | 4.58557  | -5.50581 | 4.18E-07 | 1.44E-06 | 5.784036 |
| RAB21    | -0.27378 | 0.827149 | 8.969114 | -5.50534 | 4.19E-07 | 1.44E-06 | 5.78216  |
| CD200    | 0.226502 | 1.169995 | 5.042658 | 5.504005 | 4.21E-07 | 1.44E-06 | 5.77678  |
| ACTR2    | 0.358333 | 1.281944 | 8.634684 | 5.502165 | 4.24E-07 | 1.45E-06 | 5.769369 |
| CLUH     | -0.24208 | 0.845524 | 9.129747 | -5.50194 | 4.24E-07 | 1.46E-06 | 5.768475 |
| RBM15    | 0.352134 | 1.276448 | 7.354051 | 5.496905 | 4.33E-07 | 1.49E-06 | 5.748194 |
| HABP4    | -0.20302 | 0.868728 | 6.893671 | -5.49424 | 4.38E-07 | 1.50E-06 | 5.737464 |
| SLC12A2  | -0.27547 | 0.826182 | 6.997975 | -5.49335 | 4.40E-07 | 1.51E-06 | 5.733903 |
| DKK3     | 0.658063 | 1.577963 | 4.932278 | 5.493093 | 4.40E-07 | 1.51E-06 | 5.732856 |
| SLC47A1  | -0.54739 | 0.684256 | 10.69873 | -5.49295 | 4.41E-07 | 1.51E-06 | 5.732295 |
| HAUS4    | -0.39436 | 0.760826 | 7.822658 | -5.49157 | 4.43E-07 | 1.52E-06 | 5.72673  |
| BORA     | 0.246509 | 1.186333 | 4.739494 | 5.491282 | 4.44E-07 | 1.52E-06 | 5.72557  |
| CTPS1    | -0.5431  | 0.686296 | 6.498354 | -5.49034 | 4.45E-07 | 1.52E-06 | 5.721781 |
| WDR41    | 0.370744 | 1.29302  | 6.552911 | 5.490332 | 4.45E-07 | 1.52E-06 | 5.721751 |
| EIF4G2   | 0.203155 | 1.151214 | 10.26595 | 5.489781 | 4.46E-07 | 1.52E-06 | 5.719533 |
| ACTB     | 0.410929 | 1.329542 | 11.45709 | 5.489591 | 4.47E-07 | 1.53E-06 | 5.718768 |
| HNF1B    | 0.329137 | 1.256262 | 9.486835 | 5.489279 | 4.47E-07 | 1.53E-06 | 5.717513 |
| URGCP    | -0.21086 | 0.864024 | 7.809747 | -5.48818 | 4.49E-07 | 1.53E-06 | 5.7131   |
| ALG5     | 0.215942 | 1.161462 | 9.507595 | 5.487783 | 4.50E-07 | 1.53E-06 | 5.711496 |
| SQRDL    | 0.298801 | 1.230122 | 9.561772 | 5.487154 | 4.51E-07 | 1.54E-06 | 5.708968 |
| ABCG2    | -0.52861 | 0.693222 | 5.978101 | -5.48411 | 4.57E-07 | 1.56E-06 | 5.696739 |
| MPDU1    | -0.24929 | 0.841311 | 8.861519 | -5.48367 | 4.58E-07 | 1.56E-06 | 5.694979 |
| DCLK1    | 0.223623 | 1.167662 | 3.966456 | 5.483004 | 4.59E-07 | 1.56E-06 | 5.692283 |
| MAP3K10  | -0.21663 | 0.860571 | 6.821899 | -5.48294 | 4.59E-07 | 1.56E-06 | 5.692038 |
| ETV2     | -0.20729 | 0.866165 | 4.346456 | -5.48088 | 4.63E-07 | 1.58E-06 | 5.683741 |
| OXR1     | 0.338524 | 1.264463 | 5.852278 | 5.480124 | 4.64E-07 | 1.58E-06 | 5.680706 |
| PTDSS1   | -0.24952 | 0.841177 | 9.474684 | -5.47677 | 4.71E-07 | 1.60E-06 | 5.667221 |
| GBAS     | 0.330949 | 1.25784  | 8.569114 | 5.475437 | 4.74E-07 | 1.61E-06 | 5.661877 |
| KRAS     | 0.28886  | 1.221675 | 7.603924 | 5.474954 | 4.74E-07 | 1.61E-06 | 5.659935 |

|          |          |          |          |          |          |          |          |
|----------|----------|----------|----------|----------|----------|----------|----------|
| SOAT1    | 0.259875 | 1.197375 | 5.267468 | 5.474596 | 4.75E-07 | 1.61E-06 | 5.658494 |
| PPP1R3C  | 0.540323 | 1.454298 | 7.131139 | 5.473979 | 4.76E-07 | 1.62E-06 | 5.65602  |
| SSRP1    | 0.185593 | 1.137284 | 7.56557  | 5.473287 | 4.78E-07 | 1.62E-06 | 5.653239 |
| PLAG1    | 0.241476 | 1.182201 | 4.23     | 5.472598 | 4.79E-07 | 1.62E-06 | 5.650469 |
| MAD2L1   | 0.286337 | 1.21954  | 4.205696 | 5.472533 | 4.79E-07 | 1.62E-06 | 5.650209 |
| ZEB2     | 0.287167 | 1.220242 | 4.124304 | 5.471376 | 4.82E-07 | 1.63E-06 | 5.645564 |
| NAT8B    | -0.80256 | 0.573333 | 8.18519  | -5.47107 | 4.82E-07 | 1.63E-06 | 5.64435  |
| ALG6     | 0.252734 | 1.191463 | 7.004051 | 5.469532 | 4.85E-07 | 1.64E-06 | 5.638157 |
| PCNA     | 0.295072 | 1.226947 | 8.701519 | 5.468355 | 4.88E-07 | 1.65E-06 | 5.633433 |
| NT5DC2   | 0.31612  | 1.244978 | 5.108354 | 5.46691  | 4.90E-07 | 1.66E-06 | 5.627633 |
| ARID4B   | 0.267747 | 1.203926 | 7.062278 | 5.464396 | 4.96E-07 | 1.68E-06 | 5.61754  |
| IL13     | -0.26395 | 0.832803 | 5.632785 | -5.46071 | 5.03E-07 | 1.70E-06 | 5.60273  |
| EXOC2    | 0.265659 | 1.202185 | 5.583797 | 5.459993 | 5.05E-07 | 1.71E-06 | 5.599871 |
| KLF15    | -0.31282 | 0.805067 | 6.860633 | -5.45871 | 5.07E-07 | 1.71E-06 | 5.594726 |
| CIRBP    | -0.27117 | 0.828646 | 9.517595 | -5.45435 | 5.17E-07 | 1.74E-06 | 5.577241 |
| C1orf54  | 0.589295 | 1.504511 | 8.008987 | 5.453882 | 5.18E-07 | 1.75E-06 | 5.575357 |
| SHPK     | -0.22155 | 0.857645 | 5.715063 | -5.45345 | 5.18E-07 | 1.75E-06 | 5.573613 |
| CDKN1C   | -0.4541  | 0.729967 | 8.366835 | -5.45109 | 5.23E-07 | 1.77E-06 | 5.564159 |
| RNF126   | -0.21914 | 0.859075 | 5.940633 | -5.4419  | 5.44E-07 | 1.83E-06 | 5.527316 |
| FKBP6    | -0.20462 | 0.867768 | 5.281266 | -5.44038 | 5.47E-07 | 1.84E-06 | 5.521256 |
| ZNF839   | -0.18709 | 0.878373 | 5.650759 | -5.43905 | 5.50E-07 | 1.85E-06 | 5.515926 |
| CHUK     | -0.29157 | 0.817014 | 5.61038  | -5.43651 | 5.56E-07 | 1.87E-06 | 5.505728 |
| TNFAIP6  | 0.379223 | 1.300641 | 4.197975 | 5.431872 | 5.67E-07 | 1.91E-06 | 5.487179 |
| BMP8B    | -0.29562 | 0.814723 | 4.914557 | -5.43133 | 5.68E-07 | 1.91E-06 | 5.485019 |
| SMCO4    | 0.364295 | 1.287253 | 7.9      | 5.429977 | 5.71E-07 | 1.92E-06 | 5.479596 |
| SPATA7   | -0.25899 | 0.835675 | 6.037468 | -5.42706 | 5.78E-07 | 1.94E-06 | 5.467919 |
| MT4      | -0.54405 | 0.685842 | 9.608608 | -5.42557 | 5.81E-07 | 1.95E-06 | 5.461956 |
| FBXL15   | -0.23584 | 0.849189 | 6.641266 | -5.42478 | 5.83E-07 | 1.96E-06 | 5.458792 |
| CXCL11   | 0.587727 | 1.502877 | 3.790506 | 5.422553 | 5.89E-07 | 1.98E-06 | 5.449896 |
| DPF1     | -0.24206 | 0.84554  | 6.023671 | -5.42103 | 5.92E-07 | 1.99E-06 | 5.443806 |
| HHAT     | 0.34722  | 1.272107 | 5.617215 | 5.420307 | 5.94E-07 | 1.99E-06 | 5.440912 |
| TOB1     | -0.42432 | 0.745189 | 9.891013 | -5.41481 | 6.08E-07 | 2.04E-06 | 5.41895  |
| ARSB     | -0.36254 | 0.777792 | 5.895949 | -5.41334 | 6.11E-07 | 2.05E-06 | 5.413077 |
| ST14     | 0.321621 | 1.249734 | 6.52     | 5.411785 | 6.15E-07 | 2.06E-06 | 5.406846 |
| GPT      | -0.40018 | 0.757765 | 6.843924 | -5.4112  | 6.17E-07 | 2.07E-06 | 5.404492 |
| APRT     | -0.23752 | 0.848204 | 8.097089 | -5.40775 | 6.26E-07 | 2.09E-06 | 5.390745 |
| LARP4    | -0.34554 | 0.787013 | 5.615443 | -5.40559 | 6.31E-07 | 2.11E-06 | 5.382103 |
| TMCO3    | 0.348347 | 1.273101 | 6.467468 | 5.405258 | 6.32E-07 | 2.11E-06 | 5.380774 |
| ADAMTSL1 | 0.353169 | 1.277363 | 5.07557  | 5.405112 | 6.32E-07 | 2.11E-06 | 5.380194 |
| ZMYND8   | 0.316173 | 1.245023 | 6.336203 | 5.4046   | 6.34E-07 | 2.12E-06 | 5.378147 |
| PRPF19   | 0.21558  | 1.16117  | 7.751139 | 5.404077 | 6.35E-07 | 2.12E-06 | 5.376059 |
| ASF1A    | 0.304631 | 1.235103 | 6.877468 | 5.401905 | 6.41E-07 | 2.14E-06 | 5.367387 |
| RAB38    | 0.323689 | 1.251527 | 6.503038 | 5.401833 | 6.41E-07 | 2.14E-06 | 5.367099 |
| ORAI3    | -0.23752 | 0.848204 | 8.187089 | -5.39988 | 6.46E-07 | 2.16E-06 | 5.359291 |
| PYGL     | 0.331074 | 1.257949 | 5.190253 | 5.396172 | 6.56E-07 | 2.19E-06 | 5.344503 |
| ATP8B2   | 0.269974 | 1.205786 | 5.908861 | 5.39513  | 6.59E-07 | 2.20E-06 | 5.340345 |
| RSAD2    | 0.733162 | 1.662278 | 4.685823 | 5.394643 | 6.60E-07 | 2.20E-06 | 5.338405 |

|         |          |          |          |          |          |          |          |
|---------|----------|----------|----------|----------|----------|----------|----------|
| DBR1    | 0.268702 | 1.204724 | 5.032025 | 5.394433 | 6.61E-07 | 2.20E-06 | 5.337568 |
| NUP133  | 0.229196 | 1.172182 | 7.231392 | 5.393943 | 6.62E-07 | 2.21E-06 | 5.33561  |
| TSPYL2  | -0.33082 | 0.795086 | 6.900506 | -5.39343 | 6.63E-07 | 2.21E-06 | 5.333555 |
| FZD4    | -0.25855 | 0.835927 | 8.007215 | -5.39268 | 6.65E-07 | 2.21E-06 | 5.330584 |
| NR4A3   | -0.48567 | 0.714168 | 4.605823 | -5.39251 | 6.66E-07 | 2.22E-06 | 5.329885 |
| CYP2C8  | -0.60586 | 0.657081 | 4.179747 | -5.39162 | 6.68E-07 | 2.22E-06 | 5.326331 |
| SPTBN4  | -0.19493 | 0.873617 | 5.586835 | -5.39114 | 6.70E-07 | 2.23E-06 | 5.324421 |
| ST3GAL4 | -0.35165 | 0.783685 | 5.825063 | -5.38849 | 6.77E-07 | 2.25E-06 | 5.313874 |
| CFHR2   | 0.347273 | 1.272153 | 4.355063 | 5.387254 | 6.80E-07 | 2.26E-06 | 5.308932 |
| UCKL1   | -0.19379 | 0.874303 | 6.39557  | -5.38636 | 6.83E-07 | 2.27E-06 | 5.305382 |
| FARP1   | 0.268399 | 1.204471 | 8.681899 | 5.38622  | 6.83E-07 | 2.27E-06 | 5.30481  |
| MELK    | 0.32753  | 1.254863 | 4.857468 | 5.385985 | 6.84E-07 | 2.27E-06 | 5.303875 |
| MOK     | -0.26123 | 0.834379 | 6.373924 | -5.38542 | 6.86E-07 | 2.27E-06 | 5.301617 |
| CALB1   | -0.80086 | 0.574006 | 10.93481 | -5.3825  | 6.94E-07 | 2.30E-06 | 5.28999  |
| PHIP    | 0.278155 | 1.212643 | 6.872278 | 5.38006  | 7.01E-07 | 2.32E-06 | 5.280259 |
| UBE2D1  | 0.223129 | 1.167263 | 4.99038  | 5.374632 | 7.16E-07 | 2.37E-06 | 5.258636 |
| FAM117A | -0.29284 | 0.816294 | 7.463544 | -5.37371 | 7.19E-07 | 2.38E-06 | 5.254966 |
| FGFR3   | -0.27171 | 0.828339 | 7.540633 | -5.37316 | 7.21E-07 | 2.39E-06 | 5.25279  |
| HECTD3  | -0.29211 | 0.816708 | 6.954937 | -5.37294 | 7.21E-07 | 2.39E-06 | 5.251889 |
| PIKFYVE | -0.26772 | 0.830631 | 5.961646 | -5.36883 | 7.34E-07 | 2.43E-06 | 5.235515 |
| LTBP3   | 0.343913 | 1.269194 | 5.659747 | 5.368547 | 7.35E-07 | 2.43E-06 | 5.234404 |
| ATP13A1 | 0.245264 | 1.185309 | 6.836582 | 5.366286 | 7.41E-07 | 2.45E-06 | 5.225406 |
| PRPF4   | -0.27905 | 0.824133 | 7.614304 | -5.36235 | 7.53E-07 | 2.49E-06 | 5.209747 |
| FRZB    | 0.62809  | 1.545517 | 5.603671 | 5.361737 | 7.55E-07 | 2.49E-06 | 5.207303 |
| KIF22   | -0.20402 | 0.868129 | 5.563038 | -5.35664 | 7.71E-07 | 2.55E-06 | 5.187032 |
| OXT     | -0.30616 | 0.808792 | 5.994937 | -5.35402 | 7.79E-07 | 2.57E-06 | 5.176633 |
| MPP5    | -0.3676  | 0.77507  | 6.992532 | -5.35376 | 7.80E-07 | 2.57E-06 | 5.175577 |
| TOP2A   | 0.393202 | 1.313305 | 3.814684 | 5.352486 | 7.84E-07 | 2.59E-06 | 5.170517 |
| CHST12  | 0.218874 | 1.163824 | 5.941646 | 5.351881 | 7.86E-07 | 2.59E-06 | 5.16811  |
| RCAN1   | -0.48856 | 0.712734 | 7.794177 | -5.35152 | 7.87E-07 | 2.59E-06 | 5.166664 |
| PPP6R1  | -0.18596 | 0.879063 | 7.069494 | -5.34977 | 7.93E-07 | 2.61E-06 | 5.159705 |
| SMARCA1 | 0.258057 | 1.195867 | 6.726709 | 5.348632 | 7.97E-07 | 2.62E-06 | 5.155199 |
| CPE     | 0.774354 | 1.710424 | 6.467595 | 5.346374 | 8.04E-07 | 2.65E-06 | 5.146227 |
| CUL9    | -0.15781 | 0.896387 | 5.887342 | -5.34559 | 8.07E-07 | 2.65E-06 | 5.14313  |
| ABCC8   | -0.26116 | 0.834417 | 5.058734 | -5.34534 | 8.08E-07 | 2.66E-06 | 5.142116 |
| AGO4    | 0.202642 | 1.150804 | 4.82443  | 5.342652 | 8.16E-07 | 2.68E-06 | 5.131443 |
| EXOSC8  | 0.274776 | 1.209806 | 6.271519 | 5.342312 | 8.18E-07 | 2.69E-06 | 5.130094 |
| TCF20   | 0.212101 | 1.158374 | 7.183165 | 5.340462 | 8.24E-07 | 2.71E-06 | 5.122744 |
| LSM7    | 0.324374 | 1.252121 | 8.015063 | 5.3389   | 8.29E-07 | 2.72E-06 | 5.116542 |
| ELMO3   | -0.31024 | 0.806505 | 6.016709 | -5.33717 | 8.35E-07 | 2.74E-06 | 5.109695 |
| TMEM160 | -0.32437 | 0.798648 | 6.913418 | -5.33709 | 8.35E-07 | 2.74E-06 | 5.109345 |
| ANKH    | -0.1679  | 0.890138 | 4.62443  | -5.33466 | 8.44E-07 | 2.77E-06 | 5.099732 |
| PLA2G16 | -0.37564 | 0.770764 | 9.805696 | -5.33456 | 8.44E-07 | 2.77E-06 | 5.099316 |
| TNNI1   | -0.28336 | 0.821675 | 4.527722 | -5.33392 | 8.46E-07 | 2.77E-06 | 5.096757 |
| NCOA6   | 0.233366 | 1.175575 | 7.309873 | 5.333457 | 8.48E-07 | 2.78E-06 | 5.094938 |
| SUPT16H | 0.255619 | 1.193848 | 8.208734 | 5.327648 | 8.68E-07 | 2.84E-06 | 5.071893 |
| CTF1    | -0.30245 | 0.810874 | 6.209747 | -5.32705 | 8.70E-07 | 2.85E-06 | 5.069522 |

|           |          |          |          |          |          |          |          |
|-----------|----------|----------|----------|----------|----------|----------|----------|
| MLLT4-AS: | -0.29739 | 0.813722 | 5.103165 | -5.32688 | 8.71E-07 | 2.85E-06 | 5.068843 |
| EVPL      | -0.213   | 0.862743 | 6.063418 | -5.32539 | 8.76E-07 | 2.87E-06 | 5.06294  |
| STT3A     | 0.351634 | 1.276005 | 8.229494 | 5.325229 | 8.77E-07 | 2.87E-06 | 5.062301 |
| NAPA      | -0.23465 | 0.849891 | 7.756329 | -5.32382 | 8.82E-07 | 2.88E-06 | 5.056695 |
| PARP6     | -0.18755 | 0.878096 | 7.37557  | -5.32321 | 8.84E-07 | 2.89E-06 | 5.05431  |
| ME1       | 0.420949 | 1.338808 | 4.926709 | 5.323003 | 8.85E-07 | 2.89E-06 | 5.053474 |
| DKFZP586I | 0.361324 | 1.284604 | 7.185063 | 5.322196 | 8.88E-07 | 2.90E-06 | 5.050274 |
| ESPL1     | -0.55943 | 0.678572 | 6.443924 | -5.31701 | 9.07E-07 | 2.96E-06 | 5.029714 |
| SAMD4B    | -0.22336 | 0.856568 | 5.952785 | -5.31629 | 9.09E-07 | 2.97E-06 | 5.026856 |
| C16orf95  | -0.20963 | 0.864758 | 5.457215 | -5.3156  | 9.12E-07 | 2.97E-06 | 5.024141 |
| LITAF     | 0.381443 | 1.302644 | 9.366076 | 5.315468 | 9.12E-07 | 2.97E-06 | 5.023611 |
| SLC43A3   | 0.259842 | 1.197347 | 6.075063 | 5.31375  | 9.19E-07 | 2.99E-06 | 5.016805 |
| CCDC28A   | -0.22773 | 0.853979 | 9.339873 | -5.31005 | 9.33E-07 | 3.04E-06 | 5.002132 |
| RHOB      | -0.6113  | 0.654605 | 9.495949 | -5.30709 | 9.44E-07 | 3.07E-06 | 4.990417 |
| CCL18     | 0.568623 | 1.483108 | 4.13557  | 5.307007 | 9.44E-07 | 3.07E-06 | 4.990101 |
| CAV2      | 0.60504  | 1.52102  | 6.268608 | 5.306803 | 9.45E-07 | 3.07E-06 | 4.989294 |
| CNOT6     | 0.264499 | 1.201219 | 7.051139 | 5.304871 | 9.52E-07 | 3.10E-06 | 4.981645 |
| CIB2      | 0.232484 | 1.174856 | 6.483418 | 5.304264 | 9.55E-07 | 3.10E-06 | 4.979242 |
| CGRRF1    | -0.2069  | 0.866399 | 7.106835 | -5.304   | 9.56E-07 | 3.11E-06 | 4.978192 |
| TBRG4     | -0.21304 | 0.862715 | 6.604051 | -5.30205 | 9.63E-07 | 3.13E-06 | 4.970468 |
| IL15RA    | 0.276311 | 1.211094 | 5.967595 | 5.301957 | 9.64E-07 | 3.13E-06 | 4.970112 |
| NAT1      | -0.3092  | 0.807088 | 7.566709 | -5.30173 | 9.65E-07 | 3.13E-06 | 4.969212 |
| PANK2     | 0.240889 | 1.181721 | 7.80519  | 5.301653 | 9.65E-07 | 3.13E-06 | 4.968911 |
| FABP2     | -0.20449 | 0.867844 | 4.672405 | -5.30026 | 9.70E-07 | 3.15E-06 | 4.9634   |
| BZRAP1    | -0.22214 | 0.857292 | 5.481772 | -5.29709 | 9.83E-07 | 3.19E-06 | 4.950849 |
| SNX10     | 0.506166 | 1.420271 | 8.037089 | 5.296952 | 9.84E-07 | 3.19E-06 | 4.950311 |
| HNRNPH3   | 0.211495 | 1.157888 | 7.702911 | 5.296848 | 9.84E-07 | 3.19E-06 | 4.949901 |
| MZB1      | 0.800975 | 1.742278 | 6.279367 | 5.29522  | 9.91E-07 | 3.21E-06 | 4.943464 |
| CTNS      | -0.22067 | 0.858166 | 7.273038 | -5.29373 | 9.97E-07 | 3.23E-06 | 4.937573 |
| STK25     | -0.25975 | 0.835233 | 6.773671 | -5.28815 | 1.02E-06 | 3.30E-06 | 4.915514 |
| LPAR1     | 0.30751  | 1.23757  | 5.413671 | 5.287669 | 1.02E-06 | 3.30E-06 | 4.913613 |
| AVP       | -0.316   | 0.803293 | 5.514304 | -5.28364 | 1.04E-06 | 3.36E-06 | 4.897701 |
| PSMG2     | 0.183228 | 1.135421 | 9.700886 | 5.283092 | 1.04E-06 | 3.36E-06 | 4.895527 |
| CYP17A1   | -1.31575 | 0.401716 | 8.358861 | -5.28289 | 1.04E-06 | 3.36E-06 | 4.894725 |
| NSF       | 0.23722  | 1.178719 | 8.301266 | 5.28233  | 1.04E-06 | 3.37E-06 | 4.892518 |
| CDH5      | 0.306765 | 1.236931 | 5.245316 | 5.280509 | 1.05E-06 | 3.39E-06 | 4.885326 |
| MSRB1     | -0.48438 | 0.714804 | 10.34962 | -5.27593 | 1.07E-06 | 3.46E-06 | 4.86723  |
| SPG21     | -0.21321 | 0.862613 | 9.803544 | -5.27163 | 1.09E-06 | 3.52E-06 | 4.850261 |
| ATP6V0D1  | -0.23125 | 0.851899 | 10.05101 | -5.27024 | 1.10E-06 | 3.54E-06 | 4.844772 |
| ENPEP     | -0.64572 | 0.639175 | 9.921139 | -5.26954 | 1.10E-06 | 3.54E-06 | 4.842008 |
| OSBPL8    | -0.33036 | 0.79534  | 8.884177 | -5.26932 | 1.10E-06 | 3.55E-06 | 4.841148 |
| DUSP3     | -0.21688 | 0.860426 | 7.708101 | -5.26747 | 1.11E-06 | 3.57E-06 | 4.833869 |
| PROCR     | 0.341482 | 1.267058 | 5.020253 | 5.264903 | 1.12E-06 | 3.61E-06 | 4.823737 |
| GLB1L     | -0.27173 | 0.828328 | 7.96519  | -5.25953 | 1.15E-06 | 3.68E-06 | 4.802565 |
| HMG20B    | -0.21802 | 0.859742 | 7.712405 | -5.25905 | 1.15E-06 | 3.69E-06 | 4.800666 |
| AZIN1     | 0.259018 | 1.196664 | 8.124937 | 5.258616 | 1.15E-06 | 3.70E-06 | 4.798952 |
| MFSD5     | 0.23247  | 1.174845 | 7.126456 | 5.25538  | 1.16E-06 | 3.74E-06 | 4.7862   |

|          |          |          |          |          |          |          |          |
|----------|----------|----------|----------|----------|----------|----------|----------|
| RND3     | 0.555329 | 1.469504 | 7.990886 | 5.255216 | 1.17E-06 | 3.74E-06 | 4.785551 |
| PRODH    | -0.46481 | 0.724567 | 5.746709 | -5.25371 | 1.17E-06 | 3.77E-06 | 4.779637 |
| LRP10    | 0.22502  | 1.168793 | 8.53443  | 5.252395 | 1.18E-06 | 3.78E-06 | 4.774438 |
| POMT1    | -0.23315 | 0.850776 | 6.41     | -5.24988 | 1.19E-06 | 3.82E-06 | 4.764523 |
| MGST2    | -0.23885 | 0.847418 | 9.465443 | -5.24974 | 1.19E-06 | 3.82E-06 | 4.763964 |
| DCN      | 0.741265 | 1.671641 | 9.597468 | 5.246499 | 1.21E-06 | 3.87E-06 | 4.751222 |
| GSTZ1    | -0.27287 | 0.827674 | 7.377975 | -5.24637 | 1.21E-06 | 3.87E-06 | 4.750723 |
| PNPLA2   | -0.19929 | 0.87098  | 7.352405 | -5.24563 | 1.21E-06 | 3.88E-06 | 4.747804 |
| CD36     | 0.438775 | 1.355453 | 4.416329 | 5.244414 | 1.22E-06 | 3.90E-06 | 4.743011 |
| DLGAP2   | -0.22106 | 0.857934 | 4.962658 | -5.24279 | 1.23E-06 | 3.92E-06 | 4.736625 |
| NUDT1    | 0.270665 | 1.206364 | 5.259367 | 5.241424 | 1.23E-06 | 3.94E-06 | 4.731246 |
| GABRR2   | -0.25358 | 0.838814 | 6.34038  | -5.24141 | 1.23E-06 | 3.94E-06 | 4.731172 |
| SLC1A5   | -0.29379 | 0.815757 | 6.682278 | -5.24063 | 1.24E-06 | 3.95E-06 | 4.728132 |
| SPATS2   | 0.237793 | 1.179188 | 5.159114 | 5.240384 | 1.24E-06 | 3.96E-06 | 4.727152 |
| TSPAN1   | 0.426884 | 1.344327 | 11.5781  | 5.238476 | 1.25E-06 | 3.99E-06 | 4.719645 |
| IGBP1    | -0.20924 | 0.864991 | 8.857595 | -5.2343  | 1.27E-06 | 4.05E-06 | 4.703239 |
| ITGAL    | 0.255791 | 1.19399  | 4.509241 | 5.233197 | 1.27E-06 | 4.07E-06 | 4.698884 |
| SSR1     | 0.233215 | 1.175451 | 7.92481  | 5.232224 | 1.28E-06 | 4.08E-06 | 4.69506  |
| NAT10    | 0.184361 | 1.136314 | 6.91962  | 5.23201  | 1.28E-06 | 4.09E-06 | 4.694217 |
| HSD17B11 | -0.37852 | 0.769224 | 9.591013 | -5.23166 | 1.28E-06 | 4.09E-06 | 4.692825 |
| ARHGEF17 | -0.24596 | 0.843253 | 7.10443  | -5.23161 | 1.28E-06 | 4.09E-06 | 4.692626 |
| FOXRED2  | -0.23049 | 0.852343 | 5.537848 | -5.23015 | 1.29E-06 | 4.11E-06 | 4.686908 |
| FKBP4    | -0.20881 | 0.865252 | 6.747342 | -5.22616 | 1.31E-06 | 4.18E-06 | 4.671221 |
| EIF4A3   | 0.199203 | 1.148064 | 9.087342 | 5.226077 | 1.31E-06 | 4.18E-06 | 4.670899 |
| SMARCA4  | 0.193597 | 1.143611 | 6.85     | 5.225906 | 1.31E-06 | 4.18E-06 | 4.670228 |
| TRMT1    | 0.196937 | 1.146262 | 4.679873 | 5.223535 | 1.32E-06 | 4.22E-06 | 4.660911 |
| C19orf57 | -0.2107  | 0.864115 | 6.50481  | -5.22225 | 1.33E-06 | 4.24E-06 | 4.655845 |
| XPC      | -0.24841 | 0.841826 | 8.407975 | -5.22055 | 1.34E-06 | 4.26E-06 | 4.649173 |
| ATP6V1D  | -0.23827 | 0.847763 | 10.18025 | -5.21768 | 1.36E-06 | 4.31E-06 | 4.63791  |
| PPP1R26  | -0.22669 | 0.854595 | 6.459873 | -5.21609 | 1.37E-06 | 4.34E-06 | 4.63169  |
| CD55     | 0.340626 | 1.266306 | 6.037722 | 5.215709 | 1.37E-06 | 4.34E-06 | 4.630181 |
| PHGDH    | -0.57571 | 0.670955 | 7.948861 | -5.21386 | 1.38E-06 | 4.37E-06 | 4.622923 |
| RFC2     | 0.220962 | 1.16551  | 5.890127 | 5.213307 | 1.38E-06 | 4.38E-06 | 4.620753 |
| GAK      | -0.18659 | 0.878678 | 8.125316 | -5.21279 | 1.38E-06 | 4.39E-06 | 4.618737 |
| LSM8     | 0.211884 | 1.1582   | 6.613291 | 5.211871 | 1.39E-06 | 4.41E-06 | 4.615115 |
| STAT4    | 0.416133 | 1.334346 | 5.447089 | 5.210441 | 1.40E-06 | 4.43E-06 | 4.609504 |
| USP33    | 0.203814 | 1.151739 | 8.154051 | 5.209073 | 1.40E-06 | 4.45E-06 | 4.604138 |
| TFEB     | -0.19108 | 0.87595  | 6.589747 | -5.20752 | 1.41E-06 | 4.48E-06 | 4.598048 |
| GPB1     | -0.32061 | 0.80073  | 5.017595 | -5.20726 | 1.41E-06 | 4.48E-06 | 4.597032 |
| PPP1R12A | 0.244796 | 1.184925 | 6.30443  | 5.206958 | 1.42E-06 | 4.48E-06 | 4.595843 |
| SFRP1    | 0.575283 | 1.48997  | 7.729873 | 5.206134 | 1.42E-06 | 4.50E-06 | 4.592611 |
| MAN2A2   | -0.18911 | 0.877146 | 6.30557  | -5.20564 | 1.42E-06 | 4.51E-06 | 4.590675 |
| HPGDS    | 0.397194 | 1.316944 | 4.834177 | 5.204151 | 1.43E-06 | 4.53E-06 | 4.584835 |
| SGSH     | 0.204881 | 1.152592 | 5.867975 | 5.20361  | 1.44E-06 | 4.54E-06 | 4.582711 |
| TRIM13   | -0.31402 | 0.804398 | 7.437089 | -5.20098 | 1.45E-06 | 4.59E-06 | 4.572405 |
| CHMP6    | -0.19929 | 0.87098  | 6.412405 | -5.19994 | 1.46E-06 | 4.60E-06 | 4.56834  |
| IFI35    | 0.454466 | 1.370276 | 7.378101 | 5.197701 | 1.47E-06 | 4.64E-06 | 4.559548 |

|         |          |          |          |          |          |          |          |
|---------|----------|----------|----------|----------|----------|----------|----------|
| NDUFAF4 | -0.31704 | 0.802718 | 7.602785 | -5.19624 | 1.48E-06 | 4.67E-06 | 4.553819 |
| ALLC    | -0.28904 | 0.818444 | 4.898608 | -5.19507 | 1.49E-06 | 4.69E-06 | 4.549231 |
| TSR2    | -0.17425 | 0.886229 | 7.808734 | -5.19492 | 1.49E-06 | 4.69E-06 | 4.548651 |
| OR1D2   | -0.21316 | 0.862644 | 5.731392 | -5.19232 | 1.50E-06 | 4.74E-06 | 4.538458 |
| ASIC4   | -0.20891 | 0.865193 | 5.490127 | -5.19175 | 1.51E-06 | 4.75E-06 | 4.536228 |
| IL36A   | -0.2187  | 0.859338 | 5.008861 | -5.19155 | 1.51E-06 | 4.75E-06 | 4.535446 |
| AIM2    | 0.415224 | 1.333506 | 5.136709 | 5.187868 | 1.53E-06 | 4.82E-06 | 4.521035 |
| RIN1    | -0.22729 | 0.854237 | 6.10962  | -5.18758 | 1.53E-06 | 4.82E-06 | 4.519903 |
| STARD8  | -0.3309  | 0.795043 | 6.948734 | -5.18729 | 1.53E-06 | 4.82E-06 | 4.518779 |
| PRKACG  | -0.21503 | 0.861526 | 5.162785 | -5.18727 | 1.53E-06 | 4.82E-06 | 4.518675 |
| PRSS16  | 0.284835 | 1.218271 | 4.582025 | 5.185474 | 1.54E-06 | 4.86E-06 | 4.511662 |
| KANK2   | 0.264374 | 1.201115 | 7.63     | 5.184198 | 1.55E-06 | 4.88E-06 | 4.50667  |
| F12     | 0.36031  | 1.283701 | 5.778987 | 5.183203 | 1.56E-06 | 4.90E-06 | 4.502776 |
| PRIM1   | 0.320152 | 1.248462 | 5.958734 | 5.182863 | 1.56E-06 | 4.90E-06 | 4.501446 |
| ZDHHC24 | -0.1737  | 0.886569 | 7.181139 | -5.17927 | 1.58E-06 | 4.97E-06 | 4.487391 |
| SOCS2   | -0.70109 | 0.615106 | 6.789747 | -5.17656 | 1.60E-06 | 5.03E-06 | 4.476768 |
| UBE2B   | -0.16039 | 0.894784 | 8.392785 | -5.17626 | 1.60E-06 | 5.03E-06 | 4.475605 |
| ABHD11  | 0.244084 | 1.184341 | 7.058481 | 5.175997 | 1.60E-06 | 5.03E-06 | 4.474586 |
| KCNG2   | -0.21791 | 0.859809 | 4.726582 | -5.17595 | 1.61E-06 | 5.03E-06 | 4.474388 |
| APOLD1  | -0.64894 | 0.637749 | 5.783924 | -5.17543 | 1.61E-06 | 5.04E-06 | 4.472377 |
| CRMP1   | -0.2435  | 0.844695 | 6.616329 | -5.17451 | 1.61E-06 | 5.06E-06 | 4.468789 |
| TPPP3   | -0.37511 | 0.771046 | 5.824177 | -5.17217 | 1.63E-06 | 5.10E-06 | 4.459623 |
| DPAGT1  | 0.224638 | 1.168484 | 7.242532 | 5.170913 | 1.64E-06 | 5.13E-06 | 4.454708 |
| S1PR1   | 0.414618 | 1.332946 | 5.206456 | 5.169171 | 1.65E-06 | 5.16E-06 | 4.4479   |
| TMBIM1  | 0.233162 | 1.175408 | 8.676962 | 5.167366 | 1.66E-06 | 5.20E-06 | 4.440847 |
| ADGRE2  | 0.308248 | 1.238203 | 4.083544 | 5.166738 | 1.67E-06 | 5.21E-06 | 4.438394 |
| FEZ2    | 0.210547 | 1.157127 | 8.831646 | 5.165992 | 1.67E-06 | 5.22E-06 | 4.435481 |
| DPYSL2  | 0.326285 | 1.25378  | 9.464557 | 5.164832 | 1.68E-06 | 5.25E-06 | 4.430949 |
| SNAPC2  | -0.2116  | 0.863578 | 6.031392 | -5.16455 | 1.68E-06 | 5.25E-06 | 4.429855 |
| NDC80   | 0.273933 | 1.209099 | 3.825949 | 5.1644   | 1.68E-06 | 5.25E-06 | 4.429259 |
| KBTBD2  | 0.253057 | 1.191729 | 7.06962  | 5.162718 | 1.69E-06 | 5.28E-06 | 4.42269  |
| SLC16A5 | 0.387437 | 1.308068 | 5.843797 | 5.160405 | 1.71E-06 | 5.33E-06 | 4.413659 |
| CSE1L   | 0.221087 | 1.165611 | 7.811266 | 5.159124 | 1.72E-06 | 5.36E-06 | 4.408656 |
| SNRPF   | 0.234071 | 1.176149 | 8.527342 | 5.15896  | 1.72E-06 | 5.36E-06 | 4.408017 |
| OPLAH   | -0.3058  | 0.808995 | 5.781392 | -5.15877 | 1.72E-06 | 5.36E-06 | 4.407268 |
| MISP    | -0.27374 | 0.827171 | 7.81     | -5.1578  | 1.73E-06 | 5.38E-06 | 4.403499 |
| CARHSP1 | 0.331377 | 1.258214 | 8.27038  | 5.157768 | 1.73E-06 | 5.38E-06 | 4.403362 |
| NPRL2   | -0.167   | 0.890695 | 7.876329 | -5.15515 | 1.75E-06 | 5.43E-06 | 4.393132 |
| TP53BP2 | 0.326001 | 1.253534 | 6.669873 | 5.153869 | 1.75E-06 | 5.46E-06 | 4.388143 |
| MYD88   | 0.259671 | 1.197205 | 8.704557 | 5.153386 | 1.76E-06 | 5.47E-06 | 4.386262 |
| PPP1R8  | 0.184163 | 1.136158 | 8.42519  | 5.153228 | 1.76E-06 | 5.47E-06 | 4.385645 |
| MFAP2   | 0.365646 | 1.288458 | 5.518608 | 5.152179 | 1.77E-06 | 5.49E-06 | 4.381551 |
| UAP1L1  | -0.29107 | 0.817297 | 4.864937 | -5.15137 | 1.77E-06 | 5.51E-06 | 4.378378 |
| GRAMD4  | 0.216574 | 1.161971 | 5.591772 | 5.15094  | 1.77E-06 | 5.51E-06 | 4.376715 |
| PPIH    | 0.358966 | 1.282506 | 7.028861 | 5.150907 | 1.78E-06 | 5.51E-06 | 4.376588 |
| AMZ2    | -0.23525 | 0.849538 | 8.324557 | -5.15017 | 1.78E-06 | 5.53E-06 | 4.373722 |
| ABCC3   | 0.480883 | 1.395597 | 6.596962 | 5.147154 | 1.80E-06 | 5.59E-06 | 4.361949 |

|           |          |          |          |          |          |          |          |
|-----------|----------|----------|----------|----------|----------|----------|----------|
| TSPYL5    | 0.411225 | 1.329815 | 6.958734 | 5.144381 | 1.82E-06 | 5.65E-06 | 4.351137 |
| WASF2     | 0.303228 | 1.233902 | 7.131013 | 5.143973 | 1.83E-06 | 5.66E-06 | 4.349548 |
| CEND1     | -0.21748 | 0.860068 | 6.096329 | -5.14237 | 1.84E-06 | 5.70E-06 | 4.343304 |
| ASCC2     | -0.19759 | 0.872007 | 5.650506 | -5.14206 | 1.84E-06 | 5.70E-06 | 4.342094 |
| GCAT      | -0.32174 | 0.800105 | 7.647342 | -5.14161 | 1.84E-06 | 5.71E-06 | 4.340318 |
| KRT4      | -0.23903 | 0.847314 | 5.396456 | -5.1406  | 1.85E-06 | 5.73E-06 | 4.336387 |
| MYL10     | -0.2044  | 0.867899 | 5.961139 | -5.13873 | 1.86E-06 | 5.77E-06 | 4.329102 |
| SH3GLB1   | 0.187431 | 1.138734 | 8.671772 | 5.138068 | 1.87E-06 | 5.78E-06 | 4.326533 |
| BMP7      | -0.18671 | 0.878605 | 5.202658 | -5.13775 | 1.87E-06 | 5.79E-06 | 4.325313 |
| CD8A      | 0.477563 | 1.392389 | 5.952532 | 5.137683 | 1.87E-06 | 5.79E-06 | 4.325034 |
| ANOS1     | 0.31195  | 1.241384 | 4.759873 | 5.137154 | 1.88E-06 | 5.80E-06 | 4.322973 |
| SEZ6L2    | 0.312984 | 1.242275 | 5.791392 | 5.137082 | 1.88E-06 | 5.80E-06 | 4.322691 |
| DDX47     | 0.192167 | 1.142479 | 9.04962  | 5.1348   | 1.89E-06 | 5.85E-06 | 4.313805 |
| SEMA6C    | -0.26495 | 0.832229 | 6.482152 | -5.13407 | 1.90E-06 | 5.86E-06 | 4.310979 |
| HOXB5     | 0.224578 | 1.168436 | 6.556203 | 5.13391  | 1.90E-06 | 5.87E-06 | 4.310337 |
| GAR1      | 0.219677 | 1.164473 | 7.406329 | 5.133477 | 1.90E-06 | 5.87E-06 | 4.30865  |
| BTBD1     | 0.268623 | 1.204658 | 8.920253 | 5.130767 | 1.92E-06 | 5.94E-06 | 4.298097 |
| INTS9     | 0.218788 | 1.163755 | 6.741392 | 5.130474 | 1.93E-06 | 5.94E-06 | 4.296959 |
| AURKA     | 0.233511 | 1.175693 | 5.086456 | 5.129664 | 1.93E-06 | 5.96E-06 | 4.293804 |
| CMAHP     | -0.40267 | 0.756458 | 5.278101 | -5.1283  | 1.94E-06 | 5.99E-06 | 4.288476 |
| BCCIP     | -0.29707 | 0.813905 | 7.428734 | -5.12819 | 1.94E-06 | 5.99E-06 | 4.28807  |
| ULK1      | -0.26041 | 0.834852 | 6.26557  | -5.12467 | 1.97E-06 | 6.07E-06 | 4.274351 |
| SDR39U1   | -0.1952  | 0.873449 | 8.650633 | -5.12452 | 1.97E-06 | 6.07E-06 | 4.273801 |
| HEPH      | 0.459018 | 1.374606 | 4.958481 | 5.121023 | 2.00E-06 | 6.16E-06 | 4.260179 |
| DYNC1L1   | -0.21417 | 0.862042 | 7.203797 | -5.11995 | 2.01E-06 | 6.18E-06 | 4.255994 |
| TRPM6     | -0.25571 | 0.837574 | 5.122532 | -5.11826 | 2.02E-06 | 6.22E-06 | 4.249431 |
| SLC25A3   | -0.14457 | 0.904648 | 12.1557  | -5.11637 | 2.04E-06 | 6.27E-06 | 4.242072 |
| RIOK3     | -0.18415 | 0.880167 | 7.431772 | -5.1127  | 2.07E-06 | 6.36E-06 | 4.22781  |
| CDX2      | -0.2445  | 0.844109 | 5.337215 | -5.11156 | 2.08E-06 | 6.38E-06 | 4.223394 |
| PSMA4     | 0.192819 | 1.142995 | 9.129241 | 5.109855 | 2.09E-06 | 6.42E-06 | 4.216765 |
| CA10      | -0.27513 | 0.826375 | 4.600506 | -5.10879 | 2.10E-06 | 6.45E-06 | 4.212624 |
| CXCL14    | -0.43872 | 0.737788 | 12.12152 | -5.10784 | 2.11E-06 | 6.47E-06 | 4.20895  |
| CSNK1G3   | 0.24386  | 1.184157 | 6.840127 | 5.10613  | 2.12E-06 | 6.51E-06 | 4.202297 |
| MORN1     | -0.21175 | 0.863488 | 5.316329 | -5.10342 | 2.15E-06 | 6.58E-06 | 4.191781 |
| FAHD2A    | -0.26062 | 0.83473  | 6.024177 | -5.10329 | 2.15E-06 | 6.58E-06 | 4.191253 |
| GPX5      | -0.16979 | 0.888973 | 4.23038  | -5.10144 | 2.16E-06 | 6.63E-06 | 4.184079 |
| FLII      | 0.219598 | 1.164409 | 7.244557 | 5.099478 | 2.18E-06 | 6.68E-06 | 4.176469 |
| WNT8B     | -0.27158 | 0.828411 | 5.581772 | -5.09825 | 2.19E-06 | 6.71E-06 | 4.17169  |
| HIST1H2AI | -0.29536 | 0.814871 | 4.763797 | -5.0978  | 2.20E-06 | 6.72E-06 | 4.169975 |
| BARD1     | 0.216008 | 1.161515 | 4.832405 | 5.096482 | 2.21E-06 | 6.75E-06 | 4.164843 |
| CKAP2     | 0.264104 | 1.20089  | 4.572278 | 5.095721 | 2.21E-06 | 6.77E-06 | 4.161892 |
| ENO1      | 0.260909 | 1.198234 | 10.60899 | 5.095168 | 2.22E-06 | 6.78E-06 | 4.159745 |
| DCAF11    | -0.1874  | 0.878188 | 7.780633 | -5.0938  | 2.23E-06 | 6.82E-06 | 4.15442  |
| RAB3A     | -0.20049 | 0.870252 | 5.18038  | -5.09345 | 2.23E-06 | 6.83E-06 | 4.153098 |
| MRPL44    | -0.29942 | 0.812579 | 6.291013 | -5.08928 | 2.27E-06 | 6.94E-06 | 4.13692  |
| MTOR      | -0.24096 | 0.846181 | 7.401519 | -5.08924 | 2.27E-06 | 6.94E-06 | 4.136757 |
| SMYD5     | -0.22859 | 0.853468 | 6.638861 | -5.08729 | 2.29E-06 | 6.99E-06 | 4.129184 |



|          |          |          |          |          |          |          |          |
|----------|----------|----------|----------|----------|----------|----------|----------|
| ADRB2    | 0.305553 | 1.235893 | 4.62481  | 5.08687  | 2.29E-06 | 7.00E-06 | 4.127565 |
| FAM111A  | 0.242095 | 1.182709 | 7.497215 | 5.086626 | 2.30E-06 | 7.00E-06 | 4.12662  |
| ACOX3    | -0.20327 | 0.868577 | 5.921392 | -5.08316 | 2.33E-06 | 7.10E-06 | 4.113178 |
| CCT2     | 0.215823 | 1.161367 | 9.424937 | 5.081764 | 2.34E-06 | 7.13E-06 | 4.107777 |
| SCNN1B   | -0.49297 | 0.71056  | 6.42038  | -5.08056 | 2.35E-06 | 7.17E-06 | 4.10311  |
| USP22    | 0.211337 | 1.157761 | 8.449367 | 5.07927  | 2.37E-06 | 7.20E-06 | 4.098119 |
| STX18    | 0.204895 | 1.152602 | 7.964937 | 5.07684  | 2.39E-06 | 7.27E-06 | 4.088707 |
| SNW1     | 0.195883 | 1.145425 | 7.542911 | 5.076413 | 2.39E-06 | 7.28E-06 | 4.087053 |
| SMARCAL1 | 0.241311 | 1.182066 | 6.407975 | 5.075054 | 2.41E-06 | 7.31E-06 | 4.081792 |
| PGAM2    | -0.24607 | 0.843188 | 4.620253 | -5.07471 | 2.41E-06 | 7.32E-06 | 4.080452 |
| CPD      | 0.323076 | 1.250995 | 6.834304 | 5.074567 | 2.41E-06 | 7.32E-06 | 4.079905 |
| OTUD3    | -0.27219 | 0.828059 | 5.793038 | -5.07376 | 2.42E-06 | 7.34E-06 | 4.076776 |
| FRAT1    | 0.31108  | 1.240636 | 5.40038  | 5.07289  | 2.43E-06 | 7.37E-06 | 4.073412 |
| ALPPL2   | -0.24271 | 0.845158 | 5.484051 | -5.07233 | 2.43E-06 | 7.38E-06 | 4.071259 |
| CCT5     | 0.2517   | 1.190609 | 9.002532 | 5.071415 | 2.44E-06 | 7.41E-06 | 4.067704 |
| NID2     | 0.5122   | 1.426224 | 6.455696 | 5.070813 | 2.45E-06 | 7.42E-06 | 4.065374 |
| PARD3    | 0.181133 | 1.133774 | 7.283924 | 5.069729 | 2.46E-06 | 7.45E-06 | 4.061179 |
| NEDD9    | -0.45102 | 0.731525 | 7.467468 | -5.06886 | 2.47E-06 | 7.47E-06 | 4.057817 |
| SLC48A1  | 0.254631 | 1.193031 | 6.536582 | 5.068845 | 2.47E-06 | 7.47E-06 | 4.057759 |
| CA11     | -0.22843 | 0.853562 | 5.452405 | -5.06563 | 2.50E-06 | 7.56E-06 | 4.045314 |
| ARHGEF28 | -0.28428 | 0.82115  | 7.97038  | -5.06463 | 2.51E-06 | 7.59E-06 | 4.041447 |
| CA8      | -0.40441 | 0.755543 | 5.350633 | -5.06304 | 2.52E-06 | 7.64E-06 | 4.035293 |
| JUND     | -0.38408 | 0.766269 | 6.111519 | -5.06221 | 2.53E-06 | 7.66E-06 | 4.032077 |
| TTK      | 0.214025 | 1.15992  | 3.78962  | 5.059595 | 2.56E-06 | 7.74E-06 | 4.021988 |
| MSN      | 0.2911   | 1.223573 | 8.497468 | 5.058718 | 2.57E-06 | 7.76E-06 | 4.018594 |
| RNF208   | -0.23063 | 0.852265 | 5.608228 | -5.05857 | 2.57E-06 | 7.76E-06 | 4.018019 |
| KDM7A    | 0.220112 | 1.164824 | 5.786076 | 5.058452 | 2.57E-06 | 7.76E-06 | 4.017567 |
| SGPP1    | -0.47993 | 0.71701  | 7.694304 | -5.05842 | 2.57E-06 | 7.76E-06 | 4.017452 |
| TMC6     | 0.254848 | 1.19321  | 5.336456 | 5.058247 | 2.57E-06 | 7.77E-06 | 4.016774 |
| FN3K     | -0.23357 | 0.850527 | 4.217215 | -5.05651 | 2.59E-06 | 7.82E-06 | 4.010065 |
| ABCC5    | 0.242352 | 1.182919 | 7.177975 | 5.05172  | 2.64E-06 | 7.96E-06 | 3.991559 |
| MAP1LC3C | 0.283768 | 1.21737  | 4.458101 | 5.051711 | 2.64E-06 | 7.96E-06 | 3.991524 |
| RIN2     | 0.309895 | 1.239617 | 9.513797 | 5.043296 | 2.73E-06 | 8.23E-06 | 3.959035 |
| RBM10    | 0.207793 | 1.15492  | 6.856582 | 5.042941 | 2.73E-06 | 8.24E-06 | 3.957662 |
| AREL1    | 0.294183 | 1.226191 | 7.096582 | 5.041076 | 2.75E-06 | 8.30E-06 | 3.950468 |
| TRAPPC13 | -0.24256 | 0.845243 | 4.750633 | -5.04084 | 2.76E-06 | 8.30E-06 | 3.949548 |
| TRAF3IP3 | 0.480876 | 1.395591 | 4.938481 | 5.039359 | 2.77E-06 | 8.35E-06 | 3.943845 |
| OIP5     | 0.184137 | 1.136137 | 4.121266 | 5.038527 | 2.78E-06 | 8.37E-06 | 3.940634 |
| PYROXD1  | -0.34472 | 0.787459 | 9.317089 | -5.03655 | 2.80E-06 | 8.44E-06 | 3.932999 |
| ICE2     | 0.235237 | 1.1771   | 5.718481 | 5.035947 | 2.81E-06 | 8.45E-06 | 3.930682 |
| COX15    | -0.19673 | 0.872524 | 6.983038 | -5.03453 | 2.83E-06 | 8.50E-06 | 3.925233 |
| STK38    | 0.307121 | 1.237236 | 7.093291 | 5.033801 | 2.83E-06 | 8.52E-06 | 3.922409 |
| SSBP3    | -0.35593 | 0.781366 | 6.910886 | -5.03063 | 2.87E-06 | 8.62E-06 | 3.910169 |
| WTAP     | 0.234315 | 1.176348 | 8.291139 | 5.029572 | 2.88E-06 | 8.66E-06 | 3.906108 |
| ENC1     | 0.256324 | 1.194431 | 5.236203 | 5.029063 | 2.89E-06 | 8.67E-06 | 3.904148 |
| NRXN2    | -0.28735 | 0.819409 | 5.296709 | -5.02868 | 2.89E-06 | 8.68E-06 | 3.902685 |
| CELSR2   | 0.207885 | 1.154994 | 6.305316 | 5.028663 | 2.89E-06 | 8.68E-06 | 3.902606 |

|           |          |          |          |          |          |          |          |
|-----------|----------|----------|----------|----------|----------|----------|----------|
| ARHGEF9   | -0.27637 | 0.825666 | 6.156076 | -5.02865 | 2.89E-06 | 8.68E-06 | 3.902556 |
| ARF4      | 0.206186 | 1.153634 | 9.907215 | 5.028448 | 2.90E-06 | 8.68E-06 | 3.901778 |
| GNLY      | 0.314223 | 1.243342 | 4.715823 | 5.027641 | 2.91E-06 | 8.71E-06 | 3.898669 |
| C1QL1     | -0.22606 | 0.854966 | 6.23557  | -5.02569 | 2.93E-06 | 8.77E-06 | 3.891169 |
| LINC00472 | -0.34984 | 0.784674 | 4.985823 | -5.0253  | 2.93E-06 | 8.78E-06 | 3.889647 |
| TMEM53    | -0.26873 | 0.830051 | 7.314051 | -5.02436 | 2.94E-06 | 8.81E-06 | 3.886031 |
| NSDHL     | -0.21479 | 0.861672 | 6.406582 | -5.02351 | 2.95E-06 | 8.84E-06 | 3.882768 |
| SIDT1     | 0.22776  | 1.171016 | 3.962532 | 5.021931 | 2.97E-06 | 8.89E-06 | 3.876674 |
| PCDHGB5   | -0.2124  | 0.863098 | 5.756709 | -5.02134 | 2.98E-06 | 8.91E-06 | 3.874415 |
| MIA3      | -0.18182 | 0.881587 | 5.94557  | -5.02028 | 2.99E-06 | 8.94E-06 | 3.870337 |
| TEF       | -0.22353 | 0.856467 | 5.362278 | -5.01302 | 3.08E-06 | 9.20E-06 | 3.842389 |
| ASMTL     | -0.21898 | 0.859173 | 7.472658 | -5.0111  | 3.10E-06 | 9.27E-06 | 3.834988 |
| BCL7A     | -0.20841 | 0.865493 | 6.314684 | -5.01091 | 3.10E-06 | 9.27E-06 | 3.834249 |
| RASAL1    | 0.225    | 1.168777 | 6.638987 | 5.010871 | 3.11E-06 | 9.27E-06 | 3.834114 |
| CLN6      | -0.19002 | 0.876594 | 5.92519  | -5.01004 | 3.12E-06 | 9.30E-06 | 3.830905 |
| GPRASP1   | -0.35773 | 0.780389 | 6.247089 | -5.00858 | 3.13E-06 | 9.35E-06 | 3.825289 |
| RPS20     | 0.344427 | 1.269647 | 11.15127 | 4.999007 | 3.25E-06 | 9.70E-06 | 3.788509 |
| THY1      | -0.8066  | 0.571727 | 9.447848 | -4.99899 | 3.25E-06 | 9.70E-06 | 3.788451 |
| SLC29A1   | 0.249381 | 1.188697 | 5.907215 | 4.997099 | 3.28E-06 | 9.77E-06 | 3.781182 |
| ARMCX1    | 0.30025  | 1.231358 | 7.717595 | 4.994245 | 3.32E-06 | 9.88E-06 | 3.770221 |
| FAM63A    | 0.208452 | 1.155448 | 7.934684 | 4.992811 | 3.34E-06 | 9.93E-06 | 3.764715 |
| BLCAP     | -0.17194 | 0.887646 | 9.277089 | -4.99263 | 3.34E-06 | 9.94E-06 | 3.76404  |
| GPR32     | -0.22202 | 0.857367 | 4.072911 | -4.99078 | 3.36E-06 | 1.00E-05 | 3.756903 |
| MAN2C1    | -0.19088 | 0.876074 | 6.922658 | -4.9894  | 3.38E-06 | 1.01E-05 | 3.751631 |
| KCNK15    | 0.30807  | 1.23805  | 4.204557 | 4.988896 | 3.39E-06 | 1.01E-05 | 3.74969  |
| CCL20     | 0.838386 | 1.788049 | 4.963038 | 4.987265 | 3.41E-06 | 1.01E-05 | 3.743434 |
| NAP1L3    | 0.297424 | 1.228948 | 4.799241 | 4.986525 | 3.42E-06 | 1.02E-05 | 3.740594 |
| HMGCS2    | -0.85443 | 0.553085 | 7.565696 | -4.98444 | 3.45E-06 | 1.02E-05 | 3.732593 |
| ICAM1     | 0.342148 | 1.267642 | 6.066835 | 4.983592 | 3.46E-06 | 1.03E-05 | 3.729346 |
| BEGAIN    | -0.26674 | 0.831196 | 5.315316 | -4.98274 | 3.47E-06 | 1.03E-05 | 3.726091 |
| PTPRF     | 0.245145 | 1.185212 | 7.063924 | 4.98267  | 3.47E-06 | 1.03E-05 | 3.725808 |
| CDC37L1   | -0.28586 | 0.820251 | 7.194937 | -4.98143 | 3.49E-06 | 1.04E-05 | 3.721038 |
| TBC1D15   | -0.24857 | 0.84173  | 7.135949 | -4.98056 | 3.50E-06 | 1.04E-05 | 3.717727 |
| PDE6A     | -0.27417 | 0.826926 | 4.858734 | -4.97867 | 3.53E-06 | 1.05E-05 | 3.710487 |
| R3HDM2    | -0.34848 | 0.785412 | 8.302911 | -4.97849 | 3.53E-06 | 1.05E-05 | 3.709778 |
| VPS4B     | 0.266028 | 1.202492 | 7.708734 | 4.977693 | 3.54E-06 | 1.05E-05 | 3.706728 |
| F3        | -0.57354 | 0.671967 | 6.187595 | -4.97669 | 3.56E-06 | 1.05E-05 | 3.7029   |
| SNRPD1    | 0.175962 | 1.129717 | 7.326329 | 4.976362 | 3.56E-06 | 1.05E-05 | 3.701627 |
| CYP2J2    | -0.37496 | 0.771127 | 6.279241 | -4.97559 | 3.57E-06 | 1.06E-05 | 3.69867  |
| MGAT2     | 0.217951 | 1.163081 | 6.344304 | 4.97474  | 3.58E-06 | 1.06E-05 | 3.695412 |
| NOD2      | 0.201989 | 1.150283 | 4.03481  | 4.974736 | 3.58E-06 | 1.06E-05 | 3.695395 |
| HTR1B     | -0.19301 | 0.874778 | 4.92481  | -4.97383 | 3.60E-06 | 1.06E-05 | 3.691925 |
| OAS1      | 0.658083 | 1.577984 | 6.227722 | 4.973079 | 3.61E-06 | 1.07E-05 | 3.689047 |
| RBM38     | -0.22981 | 0.852748 | 6.169873 | -4.97284 | 3.61E-06 | 1.07E-05 | 3.688126 |
| HMHA1     | 0.255758 | 1.193963 | 5.866835 | 4.972445 | 3.62E-06 | 1.07E-05 | 3.686619 |
| AP3M2     | 0.218267 | 1.163336 | 7.011392 | 4.969908 | 3.65E-06 | 1.08E-05 | 3.676901 |
| FOSL1     | -0.4148  | 0.750122 | 4.086076 | -4.96953 | 3.66E-06 | 1.08E-05 | 3.675436 |

|          |          |          |          |          |          |          |          |
|----------|----------|----------|----------|----------|----------|----------|----------|
| TIMP2    | 0.365896 | 1.288682 | 7.290886 | 4.968439 | 3.67E-06 | 1.08E-05 | 3.671278 |
| UBA7     | 0.228142 | 1.171326 | 6.64443  | 4.967902 | 3.68E-06 | 1.09E-05 | 3.66922  |
| TAOK3    | 0.246298 | 1.186159 | 7.178101 | 4.967215 | 3.69E-06 | 1.09E-05 | 3.666593 |
| ARL5A    | -0.25933 | 0.835477 | 8.466456 | -4.96629 | 3.70E-06 | 1.09E-05 | 3.663033 |
| TMEM140  | 0.415119 | 1.333408 | 8.111013 | 4.965703 | 3.71E-06 | 1.09E-05 | 3.660801 |
| EBAG9    | -0.18742 | 0.878176 | 8.03519  | -4.96393 | 3.74E-06 | 1.10E-05 | 3.654017 |
| GCLM     | -0.37794 | 0.769533 | 6.857342 | -4.96256 | 3.76E-06 | 1.11E-05 | 3.648757 |
| VEGFC    | 0.339901 | 1.26567  | 5.52481  | 4.96102  | 3.78E-06 | 1.11E-05 | 3.642884 |
| NFE2L1   | -0.26257 | 0.833602 | 9.553797 | -4.96095 | 3.78E-06 | 1.11E-05 | 3.642616 |
| EHBP1L1  | 0.215072 | 1.160762 | 5.028101 | 4.960888 | 3.78E-06 | 1.11E-05 | 3.642378 |
| ELL2     | -0.5599  | 0.678349 | 6.303291 | -4.96033 | 3.79E-06 | 1.11E-05 | 3.640249 |
| MCTP1    | 0.234262 | 1.176305 | 4.093291 | 4.960288 | 3.79E-06 | 1.11E-05 | 3.640082 |
| TLE2     | 0.24448  | 1.184665 | 5.527342 | 4.959113 | 3.81E-06 | 1.12E-05 | 3.635588 |
| C2orf44  | 0.20529  | 1.152918 | 5.063797 | 4.956513 | 3.85E-06 | 1.13E-05 | 3.625642 |
| P2RY14   | 0.339605 | 1.26541  | 4.273165 | 4.95561  | 3.86E-06 | 1.13E-05 | 3.622191 |
| ABCA5    | -0.21404 | 0.862117 | 6.354937 | -4.95473 | 3.88E-06 | 1.14E-05 | 3.618843 |
| B3GNT4   | -0.27818 | 0.82463  | 6.933797 | -4.95459 | 3.88E-06 | 1.14E-05 | 3.618297 |
| PNMA3    | -0.24221 | 0.845451 | 5.528608 | -4.95332 | 3.90E-06 | 1.14E-05 | 3.613418 |
| HSPA8    | -0.2099  | 0.864596 | 12.15949 | -4.9523  | 3.92E-06 | 1.15E-05 | 3.609536 |
| SRSF6    | -0.23995 | 0.846776 | 9.007595 | -4.95156 | 3.93E-06 | 1.15E-05 | 3.606695 |
| FGR      | 0.35836  | 1.281967 | 5.248608 | 4.949282 | 3.96E-06 | 1.16E-05 | 3.598002 |
| PEX3     | -0.2502  | 0.840777 | 8.132658 | -4.94813 | 3.98E-06 | 1.17E-05 | 3.593601 |
| ACSL1    | -0.37294 | 0.772205 | 10.01443 | -4.94757 | 3.99E-06 | 1.17E-05 | 3.591457 |
| HR       | -0.20281 | 0.868855 | 5.295063 | -4.94742 | 3.99E-06 | 1.17E-05 | 3.590889 |
| MPC2     | -0.22107 | 0.857931 | 10.46418 | -4.94697 | 4.00E-06 | 1.17E-05 | 3.589161 |
| COA7     | -0.2184  | 0.859519 | 7.248987 | -4.94633 | 4.01E-06 | 1.17E-05 | 3.586738 |
| KCNJ2    | 0.498287 | 1.412536 | 5.713797 | 4.944116 | 4.04E-06 | 1.18E-05 | 3.578268 |
| HOXA1    | 0.193406 | 1.14346  | 4.734051 | 4.944043 | 4.04E-06 | 1.18E-05 | 3.57799  |
| MAFF     | -1.30303 | 0.405274 | 6.895696 | -4.94327 | 4.06E-06 | 1.19E-05 | 3.575037 |
| MSH6     | 0.263808 | 1.200643 | 6.640633 | 4.941473 | 4.09E-06 | 1.19E-05 | 3.568178 |
| DDOST    | 0.213992 | 1.159893 | 10.12722 | 4.939267 | 4.12E-06 | 1.20E-05 | 3.559754 |
| UBXN6    | -0.21503 | 0.861526 | 7.482785 | -4.93925 | 4.12E-06 | 1.20E-05 | 3.559685 |
| PIGL     | -0.2791  | 0.824106 | 5.724937 | -4.93906 | 4.12E-06 | 1.20E-05 | 3.558963 |
| ITPKC    | -0.26024 | 0.834951 | 6.176076 | -4.93857 | 4.13E-06 | 1.21E-05 | 3.557111 |
| ABTB2    | -0.22518 | 0.85549  | 6.542025 | -4.93828 | 4.14E-06 | 1.21E-05 | 3.555998 |
| STX4     | 0.246126 | 1.186018 | 7.927595 | 4.938214 | 4.14E-06 | 1.21E-05 | 3.555735 |
| THNSL2   | -0.6228  | 0.649409 | 7.036582 | -4.93297 | 4.22E-06 | 1.23E-05 | 3.535746 |
| MUC13    | -0.78797 | 0.579158 | 6.222152 | -4.92986 | 4.28E-06 | 1.25E-05 | 3.523884 |
| PSORS1C2 | -0.23947 | 0.847055 | 5.278228 | -4.92964 | 4.28E-06 | 1.25E-05 | 3.523023 |
| TAF7     | 0.23581  | 1.177568 | 8.626329 | 4.926983 | 4.33E-06 | 1.26E-05 | 3.5129   |
| SMAD2    | 0.173689 | 1.127939 | 7.70038  | 4.925567 | 4.35E-06 | 1.27E-05 | 3.507502 |
| GJA3     | -0.19225 | 0.875238 | 4.790127 | -4.92536 | 4.35E-06 | 1.27E-05 | 3.506717 |
| KLRD1    | 0.212391 | 1.158607 | 4.616329 | 4.924734 | 4.36E-06 | 1.27E-05 | 3.504329 |
| RTEL1    | -0.24642 | 0.842984 | 7.370759 | -4.92384 | 4.38E-06 | 1.27E-05 | 3.500913 |
| FLRT1    | -0.25825 | 0.836099 | 5.388861 | -4.92377 | 4.38E-06 | 1.27E-05 | 3.500658 |
| PROC     | -0.54725 | 0.684325 | 7.515316 | -4.92282 | 4.40E-06 | 1.28E-05 | 3.497039 |
| GALE     | -0.2487  | 0.841657 | 8.03481  | -4.92243 | 4.40E-06 | 1.28E-05 | 3.495551 |

|          |          |          |          |          |          |          |          |
|----------|----------|----------|----------|----------|----------|----------|----------|
| GOT2     | -0.21301 | 0.862735 | 10.36646 | -4.92007 | 4.45E-06 | 1.29E-05 | 3.486571 |
| BCL6     | 0.400784 | 1.320225 | 6.346329 | 4.917358 | 4.49E-06 | 1.30E-05 | 3.476229 |
| TAC3     | -0.25669 | 0.837004 | 6.908861 | -4.91691 | 4.50E-06 | 1.30E-05 | 3.474521 |
| CHRND    | -0.18628 | 0.878866 | 4.363924 | -4.9169  | 4.50E-06 | 1.30E-05 | 3.474476 |
| PPM1D    | 0.258913 | 1.196577 | 5.769241 | 4.916462 | 4.51E-06 | 1.31E-05 | 3.472818 |
| SPRY2    | -0.32291 | 0.799455 | 6.627722 | -4.91591 | 4.52E-06 | 1.31E-05 | 3.470709 |
| GDPD2    | -0.28518 | 0.820637 | 6.328481 | -4.91382 | 4.56E-06 | 1.32E-05 | 3.462742 |
| CDC42SE1 | 0.297095 | 1.228668 | 8.08519  | 4.911605 | 4.60E-06 | 1.33E-05 | 3.454329 |
| GUCA2A   | -0.2425  | 0.845281 | 5.655443 | -4.91141 | 4.60E-06 | 1.33E-05 | 3.453603 |
| MAPK8IP2 | -0.19377 | 0.874315 | 4.951013 | -4.91106 | 4.61E-06 | 1.33E-05 | 3.452274 |
| DACT1    | 0.451871 | 1.367813 | 5.066582 | 4.91092  | 4.61E-06 | 1.33E-05 | 3.451725 |
| TCTN2    | 0.285804 | 1.219089 | 8.708734 | 4.909181 | 4.64E-06 | 1.34E-05 | 3.445108 |
| FAM182B  | -0.40016 | 0.757775 | 5.589367 | -4.90843 | 4.65E-06 | 1.34E-05 | 3.442268 |
| ACKR3    | -0.56625 | 0.675372 | 6.316076 | -4.90843 | 4.65E-06 | 1.34E-05 | 3.44226  |
| LMAN2    | 0.219361 | 1.164218 | 8.139241 | 4.908259 | 4.66E-06 | 1.34E-05 | 3.441598 |
| ITGA7    | -0.22287 | 0.856862 | 6.168861 | -4.90723 | 4.68E-06 | 1.35E-05 | 3.437683 |
| HOXC10   | -0.27696 | 0.825327 | 7.892785 | -4.90718 | 4.68E-06 | 1.35E-05 | 3.437512 |
| GNMT     | -0.25504 | 0.837964 | 4.907595 | -4.90677 | 4.68E-06 | 1.35E-05 | 3.435944 |
| STMN1    | 0.183412 | 1.135567 | 6.338354 | 4.904474 | 4.73E-06 | 1.36E-05 | 3.427203 |
| AHCYL2   | -0.22963 | 0.852853 | 6.868861 | -4.90268 | 4.76E-06 | 1.37E-05 | 3.42038  |
| CEP135   | -0.23507 | 0.849646 | 5.402025 | -4.90132 | 4.79E-06 | 1.38E-05 | 3.415222 |
| NSUN5P1  | 0.352951 | 1.277171 | 5.595696 | 4.897024 | 4.87E-06 | 1.40E-05 | 3.398887 |
| CLTCL1   | -0.19528 | 0.873401 | 5.928861 | -4.89683 | 4.87E-06 | 1.40E-05 | 3.398161 |
| FKBP5    | -1.03581 | 0.487742 | 7.889494 | -4.89621 | 4.88E-06 | 1.41E-05 | 3.395803 |
| SLC25A24 | 0.26475  | 1.201428 | 7.883418 | 4.893116 | 4.94E-06 | 1.42E-05 | 3.384043 |
| RPN2     | 0.160652 | 1.117792 | 10.36646 | 4.891589 | 4.97E-06 | 1.43E-05 | 3.378244 |
| DHX9     | 0.200329 | 1.148961 | 6.217595 | 4.891397 | 4.98E-06 | 1.43E-05 | 3.377516 |
| ABHD17B  | -0.24003 | 0.846726 | 6.807342 | -4.89138 | 4.98E-06 | 1.43E-05 | 3.377462 |
| LEMD3    | 0.189078 | 1.140035 | 7.662025 | 4.890205 | 5.00E-06 | 1.44E-05 | 3.372991 |
| C10orf2  | 0.230198 | 1.172996 | 5.970506 | 4.889888 | 5.00E-06 | 1.44E-05 | 3.371788 |
| COQ2     | 0.27552  | 1.210431 | 6.099873 | 4.889278 | 5.02E-06 | 1.44E-05 | 3.369473 |
| FUT4     | 0.297497 | 1.22901  | 5.462532 | 4.888185 | 5.04E-06 | 1.45E-05 | 3.365323 |
| NOV      | 0.438109 | 1.354828 | 5.369747 | 4.885841 | 5.08E-06 | 1.46E-05 | 3.356425 |
| GALNT6   | 0.23527  | 1.177127 | 4.560886 | 4.885558 | 5.09E-06 | 1.46E-05 | 3.355352 |
| ARHGAP28 | -0.21492 | 0.861593 | 4.516962 | -4.88449 | 5.11E-06 | 1.47E-05 | 3.351317 |
| SMAD7    | -0.36292 | 0.777587 | 6.704051 | -4.88361 | 5.13E-06 | 1.47E-05 | 3.347966 |
| PDCD10   | 0.195086 | 1.144792 | 9.806709 | 4.88223  | 5.16E-06 | 1.48E-05 | 3.342726 |
| TSPAN15  | 0.237615 | 1.179042 | 5.220127 | 4.881888 | 5.16E-06 | 1.48E-05 | 3.341429 |
| KIAA1467 | -0.2599  | 0.835145 | 6.478608 | -4.8817  | 5.17E-06 | 1.48E-05 | 3.340712 |
| GJB4     | -0.25845 | 0.835984 | 5.68443  | -4.88009 | 5.20E-06 | 1.49E-05 | 3.334608 |
| MTERF1   | 0.25108  | 1.190098 | 4.955316 | 4.880088 | 5.20E-06 | 1.49E-05 | 3.334604 |
| CACNA2D1 | -0.20628 | 0.866767 | 6.04557  | -4.8789  | 5.23E-06 | 1.50E-05 | 3.3301   |
| TMSB15A  | 0.366713 | 1.289412 | 5.042532 | 4.878621 | 5.23E-06 | 1.50E-05 | 3.329042 |
| ATR      | 0.232312 | 1.174716 | 5.842911 | 4.878315 | 5.24E-06 | 1.50E-05 | 3.327881 |
| MRPL24   | -0.19129 | 0.875822 | 10.11835 | -4.87633 | 5.28E-06 | 1.51E-05 | 3.320344 |
| RHBDL1   | -0.22385 | 0.856279 | 4.68519  | -4.87606 | 5.28E-06 | 1.51E-05 | 3.319316 |
| ZNF267   | 0.320698 | 1.248935 | 5.112658 | 4.874507 | 5.32E-06 | 1.52E-05 | 3.313447 |

|          |          |          |          |          |          |          |          |
|----------|----------|----------|----------|----------|----------|----------|----------|
| FCGR3B   | 0.919466 | 1.891416 | 4.907342 | 4.874038 | 5.33E-06 | 1.52E-05 | 3.311666 |
| CDV3     | 0.243933 | 1.184216 | 6.803418 | 4.873655 | 5.33E-06 | 1.52E-05 | 3.310218 |
| KIAA0907 | 0.321304 | 1.24946  | 7.302911 | 4.873349 | 5.34E-06 | 1.52E-05 | 3.309057 |
| HAUS3    | 0.217003 | 1.162316 | 5.563038 | 4.871995 | 5.37E-06 | 1.53E-05 | 3.303927 |
| RDX      | -0.25301 | 0.839144 | 8.229747 | -4.8718  | 5.37E-06 | 1.53E-05 | 3.303191 |
| CASP8AP2 | 0.210395 | 1.157005 | 5.306582 | 4.870783 | 5.39E-06 | 1.54E-05 | 3.299336 |
| NFKBIL1  | -0.20355 | 0.868411 | 6.33519  | -4.86898 | 5.43E-06 | 1.55E-05 | 3.292507 |
| SST      | -0.42111 | 0.746851 | 4.759747 | -4.86891 | 5.43E-06 | 1.55E-05 | 3.292236 |
| GNB2     | 0.195764 | 1.145331 | 7.760253 | 4.867745 | 5.46E-06 | 1.55E-05 | 3.287829 |
| ADAP2    | 0.385909 | 1.306683 | 6.336203 | 4.8663   | 5.49E-06 | 1.56E-05 | 3.282358 |
| RMI1     | 0.234868 | 1.176799 | 6.163544 | 4.866079 | 5.49E-06 | 1.56E-05 | 3.281519 |
| RRAS2    | -0.37792 | 0.769547 | 7.371266 | -4.86543 | 5.51E-06 | 1.57E-05 | 3.279049 |
| NASP     | 0.165184 | 1.121309 | 6.491392 | 4.864991 | 5.52E-06 | 1.57E-05 | 3.2774   |
| CEP83    | 0.219466 | 1.164303 | 4.434937 | 4.862604 | 5.57E-06 | 1.58E-05 | 3.268363 |
| OLFML2B  | 0.310652 | 1.240268 | 4.879114 | 4.857305 | 5.69E-06 | 1.62E-05 | 3.248316 |
| MECOM    | 0.51751  | 1.431482 | 8.171392 | 4.856523 | 5.70E-06 | 1.62E-05 | 3.245358 |
| SURF2    | -0.2144  | 0.861904 | 5.766962 | -4.85545 | 5.73E-06 | 1.63E-05 | 3.241288 |
| PRDX2    | -0.20435 | 0.867931 | 10.50899 | -4.85483 | 5.74E-06 | 1.63E-05 | 3.238936 |
| RPS16    | 0.175    | 1.128964 | 12.9381  | 4.854571 | 5.75E-06 | 1.63E-05 | 3.237977 |
| PRSS8    | -0.35417 | 0.78232  | 7.395316 | -4.85435 | 5.75E-06 | 1.63E-05 | 3.237127 |
| LIMD1    | 0.190237 | 1.140951 | 5.804684 | 4.851468 | 5.82E-06 | 1.65E-05 | 3.226246 |
| GPR21    | -0.18026 | 0.882542 | 6.14557  | -4.85071 | 5.83E-06 | 1.65E-05 | 3.223362 |
| FCER1A   | 0.973689 | 1.963856 | 4.744557 | 4.848605 | 5.88E-06 | 1.67E-05 | 3.215423 |
| MINA     | 0.207918 | 1.15502  | 6.497722 | 4.848054 | 5.90E-06 | 1.67E-05 | 3.213342 |
| HARS2    | 0.219921 | 1.16467  | 7.410127 | 4.84709  | 5.92E-06 | 1.68E-05 | 3.2097   |
| ITGB1BP1 | 0.235731 | 1.177503 | 6.194557 | 4.84698  | 5.92E-06 | 1.68E-05 | 3.209284 |
| PRRG2    | -0.22618 | 0.854896 | 5.932911 | -4.84693 | 5.92E-06 | 1.68E-05 | 3.209078 |
| FRMD1    | -0.19092 | 0.87605  | 5.691772 | -4.84322 | 6.01E-06 | 1.70E-05 | 3.195081 |
| NR1H3    | -0.24211 | 0.845509 | 6.765823 | -4.84117 | 6.06E-06 | 1.71E-05 | 3.187322 |
| FGF13    | 0.377213 | 1.298831 | 6.841266 | 4.840299 | 6.08E-06 | 1.72E-05 | 3.184051 |
| IQCA1    | 0.274875 | 1.209889 | 5.308734 | 4.838004 | 6.13E-06 | 1.73E-05 | 3.17539  |
| DLD      | -0.24013 | 0.846672 | 9.028608 | -4.83743 | 6.14E-06 | 1.74E-05 | 3.173212 |
| NCS1     | -0.27046 | 0.829055 | 5.123544 | -4.83719 | 6.15E-06 | 1.74E-05 | 3.172308 |
| ZP2      | -0.28796 | 0.819057 | 5.059494 | -4.8354  | 6.19E-06 | 1.75E-05 | 3.165552 |
| PMPCA    | -0.20906 | 0.865098 | 7.886582 | -4.8349  | 6.21E-06 | 1.75E-05 | 3.163675 |
| TMEM47   | 0.284895 | 1.218321 | 7.988354 | 4.831742 | 6.28E-06 | 1.77E-05 | 3.151762 |
| ADGRL2   | 0.242378 | 1.182941 | 6.901899 | 4.830535 | 6.31E-06 | 1.78E-05 | 3.14721  |
| UCHL1    | 0.598307 | 1.513939 | 8.691013 | 4.829452 | 6.34E-06 | 1.79E-05 | 3.143128 |
| TOR3A    | 0.251594 | 1.190522 | 6.716835 | 4.828373 | 6.37E-06 | 1.80E-05 | 3.139057 |
| CD3G     | 0.377233 | 1.298849 | 4.896709 | 4.827904 | 6.38E-06 | 1.80E-05 | 3.13729  |
| HSPB8    | 0.568366 | 1.482843 | 8.60481  | 4.826712 | 6.41E-06 | 1.81E-05 | 3.132795 |
| SULT2B1  | -0.23135 | 0.851837 | 6.035316 | -4.82628 | 6.42E-06 | 1.81E-05 | 3.131159 |
| RAB29    | -0.32549 | 0.798029 | 8.191646 | -4.8249  | 6.45E-06 | 1.82E-05 | 3.125958 |
| CRYZ     | -0.20405 | 0.868109 | 11.44063 | -4.82459 | 6.46E-06 | 1.82E-05 | 3.124802 |
| SREK1    | 0.220758 | 1.165345 | 6.697215 | 4.823862 | 6.48E-06 | 1.82E-05 | 3.122053 |
| MTO1     | -0.24608 | 0.843184 | 7.771772 | -4.8237  | 6.48E-06 | 1.82E-05 | 3.121432 |
| PRDM14   | -0.23094 | 0.852078 | 5.701139 | -4.82336 | 6.49E-06 | 1.83E-05 | 3.120179 |

|          |          |          |          |          |          |          |          |
|----------|----------|----------|----------|----------|----------|----------|----------|
| OR7E12P  | -0.36817 | 0.774765 | 5.983165 | -4.82331 | 6.49E-06 | 1.83E-05 | 3.119992 |
| NAA60    | -0.17111 | 0.888157 | 8.415696 | -4.81926 | 6.60E-06 | 1.85E-05 | 3.104702 |
| MRAS     | 0.312352 | 1.24173  | 6.307215 | 4.819159 | 6.60E-06 | 1.85E-05 | 3.10434  |
| OVOL1    | -0.24967 | 0.841088 | 6.38962  | -4.81897 | 6.60E-06 | 1.85E-05 | 3.103608 |
| DAB2     | -0.2603  | 0.834913 | 10.63127 | -4.8176  | 6.64E-06 | 1.86E-05 | 3.098449 |
| GLDC     | -0.38438 | 0.766108 | 9.611392 | -4.81748 | 6.64E-06 | 1.86E-05 | 3.098009 |
| UBFD1    | 0.313887 | 1.243052 | 6.143291 | 4.817407 | 6.64E-06 | 1.86E-05 | 3.097741 |
| TACC3    | 0.288155 | 1.221078 | 4.926456 | 4.817045 | 6.65E-06 | 1.87E-05 | 3.096379 |
| GTF2IRD1 | 0.226719 | 1.170171 | 8.022532 | 4.814854 | 6.71E-06 | 1.88E-05 | 3.088129 |
| IFT122   | 0.266304 | 1.202723 | 7.364937 | 4.814656 | 6.72E-06 | 1.88E-05 | 3.087384 |
| SALL2    | 0.225053 | 1.16882  | 7.276835 | 4.813847 | 6.74E-06 | 1.89E-05 | 3.08434  |
| GDF2     | -0.20383 | 0.86824  | 5.880506 | -4.81273 | 6.77E-06 | 1.90E-05 | 3.080121 |
| GSTO1    | -0.2574  | 0.836595 | 10.72139 | -4.81252 | 6.77E-06 | 1.90E-05 | 3.079333 |
| SNCG     | -0.23731 | 0.848328 | 6.618481 | -4.81227 | 6.78E-06 | 1.90E-05 | 3.078409 |
| COLEC12  | 0.358808 | 1.282366 | 4.955316 | 4.810799 | 6.82E-06 | 1.91E-05 | 3.072868 |
| UTRN     | 0.187332 | 1.138656 | 5.584557 | 4.810059 | 6.84E-06 | 1.91E-05 | 3.070085 |
| ACE2     | -0.61893 | 0.651155 | 9.193418 | -4.80958 | 6.85E-06 | 1.92E-05 | 3.06827  |
| TRMT11   | -0.22628 | 0.854837 | 6.545696 | -4.80875 | 6.87E-06 | 1.92E-05 | 3.065176 |
| ITPA     | 0.193979 | 1.143914 | 8.331899 | 4.808166 | 6.89E-06 | 1.92E-05 | 3.062963 |
| TOM1L1   | -0.22783 | 0.853921 | 9.222658 | -4.80766 | 6.90E-06 | 1.93E-05 | 3.061053 |
| HLA-DOA  | 0.212207 | 1.158459 | 5.838861 | 4.806944 | 6.92E-06 | 1.93E-05 | 3.058367 |
| CCDC176  | 0.256897 | 1.194906 | 6.824051 | 4.806543 | 6.93E-06 | 1.94E-05 | 3.056857 |
| RPL8     | 0.184592 | 1.136495 | 12.44646 | 4.806447 | 6.93E-06 | 1.94E-05 | 3.056497 |
| DUSP9    | -0.52734 | 0.693833 | 6.364937 | -4.79895 | 7.14E-06 | 1.99E-05 | 3.028328 |
| C1orf50  | -0.16308 | 0.893119 | 6.992532 | -4.79859 | 7.15E-06 | 1.99E-05 | 3.02695  |
| SIRPG    | 0.252266 | 1.191077 | 4.191899 | 4.797697 | 7.17E-06 | 2.00E-05 | 3.023609 |
| CCND1    | -0.31326 | 0.804821 | 6.772405 | -4.79767 | 7.17E-06 | 2.00E-05 | 3.023515 |
| CPSF6    | 0.165204 | 1.121325 | 6.446835 | 4.795742 | 7.23E-06 | 2.01E-05 | 3.016263 |
| IL6R     | -0.42225 | 0.746262 | 6.292532 | -4.79542 | 7.24E-06 | 2.02E-05 | 3.01507  |
| RBFA     | -0.17976 | 0.882852 | 6.888608 | -4.79468 | 7.26E-06 | 2.02E-05 | 3.012285 |
| PTGES2   | -0.16807 | 0.890033 | 7.893924 | -4.79406 | 7.28E-06 | 2.02E-05 | 3.009948 |
| CD2AP    | 0.238129 | 1.179462 | 7.541646 | 4.794053 | 7.28E-06 | 2.02E-05 | 3.00992  |
| LPIN1    | 0.214177 | 1.160042 | 6.344684 | 4.793022 | 7.30E-06 | 2.03E-05 | 3.006049 |
| CHPF2    | 0.178775 | 1.131922 | 6.547722 | 4.791901 | 7.34E-06 | 2.04E-05 | 3.001841 |
| ERLIN2   | -0.25265 | 0.83935  | 7.107722 | -4.78926 | 7.41E-06 | 2.06E-05 | 2.99192  |
| PIGT     | 0.194592 | 1.1444   | 8.410633 | 4.788196 | 7.44E-06 | 2.07E-05 | 2.987932 |
| UPK2     | -0.16987 | 0.888924 | 4.488608 | -4.78593 | 7.51E-06 | 2.09E-05 | 2.979431 |
| SCN4A    | -0.18559 | 0.879288 | 4.50443  | -4.78498 | 7.54E-06 | 2.09E-05 | 2.975858 |
| HERC1    | -0.25929 | 0.8355   | 6.487342 | -4.78333 | 7.59E-06 | 2.11E-05 | 2.969661 |
| FNDC8    | -0.20258 | 0.868998 | 4.77038  | -4.78256 | 7.61E-06 | 2.11E-05 | 2.966798 |
| SAP30L   | -0.19843 | 0.871501 | 5.963418 | -4.78154 | 7.64E-06 | 2.12E-05 | 2.962979 |
| IDO1     | 0.537668 | 1.451624 | 5.573291 | 4.780696 | 7.66E-06 | 2.13E-05 | 2.959802 |
| RPAP1    | -0.16325 | 0.893013 | 6.172025 | -4.78049 | 7.67E-06 | 2.13E-05 | 2.959029 |
| TMPRSS2  | -0.38421 | 0.766199 | 7.141899 | -4.78009 | 7.68E-06 | 2.13E-05 | 2.957534 |
| AKIP1    | 0.190138 | 1.140873 | 6.047468 | 4.779763 | 7.69E-06 | 2.13E-05 | 2.956302 |
| TMEM259  | -0.19247 | 0.875106 | 4.950253 | -4.77831 | 7.73E-06 | 2.14E-05 | 2.950864 |
| SRSF7    | 0.285231 | 1.218605 | 7.600886 | 4.775392 | 7.82E-06 | 2.17E-05 | 2.93992  |

|           |          |          |          |          |          |          |          |
|-----------|----------|----------|----------|----------|----------|----------|----------|
| CRYZL1    | -0.23822 | 0.84779  | 6.98962  | -4.77333 | 7.89E-06 | 2.18E-05 | 2.932187 |
| ERVMER34  | -0.30455 | 0.809694 | 5.234304 | -4.77291 | 7.90E-06 | 2.19E-05 | 2.93063  |
| RUFY1     | 0.17695  | 1.130491 | 8.188481 | 4.772155 | 7.92E-06 | 2.19E-05 | 2.927792 |
| UBXN7     | 0.193333 | 1.143402 | 5.920759 | 4.771992 | 7.93E-06 | 2.19E-05 | 2.927183 |
| SLC34A2   | 0.567062 | 1.481503 | 5.42557  | 4.771283 | 7.95E-06 | 2.20E-05 | 2.924525 |
| DSCR3     | -0.21849 | 0.859464 | 6.330253 | -4.77104 | 7.96E-06 | 2.20E-05 | 2.923611 |
| ZNF771    | -0.23907 | 0.847291 | 6.89557  | -4.76965 | 8.00E-06 | 2.21E-05 | 2.918394 |
| CSTF2T    | 0.205744 | 1.153281 | 6.458987 | 4.766768 | 8.09E-06 | 2.23E-05 | 2.907622 |
| ATG4A     | -0.18449 | 0.879962 | 7.399241 | -4.7653  | 8.13E-06 | 2.25E-05 | 2.902113 |
| ARHGAP33  | -0.17992 | 0.882751 | 5.856582 | -4.76375 | 8.18E-06 | 2.26E-05 | 2.896314 |
| ERH       | 0.172365 | 1.126904 | 10.9057  | 4.763548 | 8.19E-06 | 2.26E-05 | 2.895569 |
| STK19     | 0.510995 | 1.425032 | 7.463671 | 4.762894 | 8.21E-06 | 2.26E-05 | 2.893123 |
| LIN7B     | -0.24877 | 0.841611 | 6.083038 | -4.76122 | 8.26E-06 | 2.28E-05 | 2.886868 |
| RAB25     | 0.359308 | 1.282811 | 6.929873 | 4.760658 | 8.28E-06 | 2.28E-05 | 2.884759 |
| AGPAT2    | 0.196311 | 1.145765 | 6.904177 | 4.757734 | 8.38E-06 | 2.31E-05 | 2.87382  |
| CAPZA2    | 0.233004 | 1.17528  | 9.123418 | 4.757306 | 8.39E-06 | 2.31E-05 | 2.872222 |
| MCTS1     | 0.203491 | 1.151482 | 7.988481 | 4.755914 | 8.44E-06 | 2.32E-05 | 2.867016 |
| TRIM45    | 0.215007 | 1.160709 | 5.743291 | 4.754386 | 8.49E-06 | 2.34E-05 | 2.861304 |
| GINS2     | 0.263439 | 1.200336 | 4.825696 | 4.754335 | 8.49E-06 | 2.34E-05 | 2.861113 |
| TBC1D8B   | -0.59829 | 0.660538 | 6.08443  | -4.75082 | 8.60E-06 | 2.37E-05 | 2.847988 |
| ACP5      | -0.54096 | 0.687313 | 9.436203 | -4.74963 | 8.64E-06 | 2.38E-05 | 2.84352  |
| NDUFS2    | -0.17635 | 0.884939 | 10.43329 | -4.74848 | 8.68E-06 | 2.39E-05 | 2.839244 |
| ARHGEF10  | 0.202134 | 1.150399 | 6.891392 | 4.748073 | 8.70E-06 | 2.39E-05 | 2.837717 |
| HSPA5     | 0.380217 | 1.301538 | 9.698608 | 4.747536 | 8.71E-06 | 2.39E-05 | 2.835709 |
| HIST1H2BI | -0.18285 | 0.880963 | 3.761013 | -4.74574 | 8.77E-06 | 2.41E-05 | 2.828996 |
| C12orf29  | -0.23059 | 0.852288 | 7.159114 | -4.74262 | 8.88E-06 | 2.44E-05 | 2.817349 |
| SLC16A3   | 0.388538 | 1.309066 | 5.770127 | 4.741677 | 8.91E-06 | 2.45E-05 | 2.813835 |
| CLCN1     | -0.19106 | 0.875962 | 5.09519  | -4.74129 | 8.93E-06 | 2.45E-05 | 2.812383 |
| RNPS1     | 0.230527 | 1.173263 | 8.274557 | 4.741241 | 8.93E-06 | 2.45E-05 | 2.812206 |
| CEP55     | 0.262978 | 1.199953 | 3.822025 | 4.73664  | 9.09E-06 | 2.49E-05 | 2.79504  |
| FTL       | -0.20516 | 0.86744  | 13.48734 | -4.7358  | 9.12E-06 | 2.50E-05 | 2.7919   |
| COX5B     | -0.20717 | 0.866232 | 11.27063 | -4.73572 | 9.12E-06 | 2.50E-05 | 2.791625 |
| NCL       | 0.20975  | 1.156487 | 10.55544 | 4.73569  | 9.12E-06 | 2.50E-05 | 2.791499 |
| PDIA3     | 0.283656 | 1.217276 | 9.223924 | 4.73535  | 9.13E-06 | 2.50E-05 | 2.790232 |
| CHP1      | -0.26886 | 0.829975 | 8.92443  | -4.73434 | 9.17E-06 | 2.51E-05 | 2.786479 |
| COQ3      | -0.24442 | 0.844155 | 7.388987 | -4.73421 | 9.17E-06 | 2.51E-05 | 2.785965 |
| CLPX      | -0.27889 | 0.824223 | 6.167848 | -4.73325 | 9.21E-06 | 2.52E-05 | 2.782386 |
| AGPAT4    | 0.21863  | 1.163628 | 4.967848 | 4.726285 | 9.46E-06 | 2.59E-05 | 2.75644  |
| ZNF264    | 0.245856 | 1.185796 | 6.449873 | 4.724926 | 9.51E-06 | 2.60E-05 | 2.751377 |
| C3orf14   | 0.23724  | 1.178735 | 6.576709 | 4.724837 | 9.51E-06 | 2.60E-05 | 2.751046 |
| PRRG1     | 0.354578 | 1.278612 | 6.830506 | 4.723973 | 9.54E-06 | 2.61E-05 | 2.747829 |
| RGR       | -0.19313 | 0.874706 | 4.532152 | -4.72287 | 9.58E-06 | 2.62E-05 | 2.743718 |
| PAPPA     | 0.351594 | 1.27597  | 5.868608 | 4.722773 | 9.59E-06 | 2.62E-05 | 2.743359 |
| GOLGA4    | -0.18951 | 0.876902 | 9.038228 | -4.72142 | 9.64E-06 | 2.63E-05 | 2.738335 |
| TMEM110   | -0.25227 | 0.839577 | 6.708101 | -4.72084 | 9.66E-06 | 2.64E-05 | 2.736148 |
| PARD6A    | -0.2121  | 0.863279 | 6.536835 | -4.71873 | 9.74E-06 | 2.66E-05 | 2.728305 |
| LY6G6D    | -0.17442 | 0.886124 | 4.568228 | -4.71844 | 9.75E-06 | 2.66E-05 | 2.72722  |

|          |          |          |          |          |          |          |          |
|----------|----------|----------|----------|----------|----------|----------|----------|
| CACNA1I  | -0.17599 | 0.885161 | 5.009747 | -4.71743 | 9.79E-06 | 2.67E-05 | 2.723455 |
| OSGIN1   | -0.25208 | 0.839688 | 6.054051 | -4.71592 | 9.84E-06 | 2.68E-05 | 2.717846 |
| SECTM1   | 0.348762 | 1.273467 | 6.181772 | 4.715007 | 9.88E-06 | 2.69E-05 | 2.714452 |
| AAMDC    | -0.19099 | 0.876002 | 6.86     | -4.71233 | 9.98E-06 | 2.72E-05 | 2.704479 |
| GADD45G  | -0.47619 | 0.718872 | 5.341519 | -4.7097  | 1.01E-05 | 2.75E-05 | 2.69473  |
| SLC22A1  | -0.25118 | 0.840209 | 4.787468 | -4.70927 | 1.01E-05 | 2.75E-05 | 2.69311  |
| OGFRL1   | 0.237819 | 1.179209 | 5.233038 | 4.709182 | 1.01E-05 | 2.75E-05 | 2.69279  |
| PALLD    | 0.376357 | 1.29806  | 8.498734 | 4.708353 | 1.01E-05 | 2.76E-05 | 2.689707 |
| SLC12A8  | 0.2883   | 1.221201 | 4.883038 | 4.707445 | 1.02E-05 | 2.77E-05 | 2.686332 |
| MMP9     | 0.518972 | 1.432934 | 5.134177 | 4.707081 | 1.02E-05 | 2.77E-05 | 2.68498  |
| MPPE1    | 0.198821 | 1.14776  | 8.495443 | 4.706664 | 1.02E-05 | 2.77E-05 | 2.683429 |
| LGSN     | -0.28112 | 0.822952 | 3.851266 | -4.70616 | 1.02E-05 | 2.78E-05 | 2.68156  |
| UBAC1    | -0.18204 | 0.881454 | 7.405696 | -4.70599 | 1.02E-05 | 2.78E-05 | 2.680934 |
| HOMER3   | 0.306726 | 1.236898 | 6.93443  | 4.705026 | 1.03E-05 | 2.79E-05 | 2.677342 |
| LIM2     | -0.21168 | 0.863531 | 5.22962  | -4.70442 | 1.03E-05 | 2.79E-05 | 2.675108 |
| APBB3    | -0.21744 | 0.860088 | 6.578734 | -4.70426 | 1.03E-05 | 2.79E-05 | 2.674489 |
| SLC37A1  | 0.221403 | 1.165867 | 5.338354 | 4.703876 | 1.03E-05 | 2.80E-05 | 2.673069 |
| TEAD4    | 0.302484 | 1.233266 | 6.092658 | 4.703547 | 1.03E-05 | 2.80E-05 | 2.671846 |
| CNN2     | 0.257655 | 1.195534 | 7.419367 | 4.703475 | 1.03E-05 | 2.80E-05 | 2.671581 |
| GLRB     | 0.208966 | 1.155859 | 4.116203 | 4.703276 | 1.03E-05 | 2.80E-05 | 2.67084  |
| CAMK2A   | -0.23013 | 0.852561 | 5.862785 | -4.70291 | 1.04E-05 | 2.80E-05 | 2.669463 |
| SHC3     | -0.16663 | 0.890923 | 5.531266 | -4.70217 | 1.04E-05 | 2.81E-05 | 2.666716 |
| SASH1    | 0.257536 | 1.195435 | 7.276709 | 4.700784 | 1.04E-05 | 2.82E-05 | 2.661585 |
| HDGFRP3  | 0.226041 | 1.169621 | 6.158987 | 4.699817 | 1.05E-05 | 2.83E-05 | 2.657994 |
| NAMPT    | 0.362622 | 1.28576  | 7.835823 | 4.699784 | 1.05E-05 | 2.83E-05 | 2.657869 |
| GRPR     | -0.21914 | 0.859075 | 6.880633 | -4.69944 | 1.05E-05 | 2.84E-05 | 2.656608 |
| C1QBP    | -0.21798 | 0.859766 | 9.333291 | -4.6987  | 1.05E-05 | 2.84E-05 | 2.653834 |
| PRRX1    | 0.323149 | 1.251058 | 4.497595 | 4.69832  | 1.05E-05 | 2.85E-05 | 2.652436 |
| PRSS3    | -0.43511 | 0.73964  | 6.827595 | -4.69799 | 1.05E-05 | 2.85E-05 | 2.65119  |
| GUK1     | -0.17864 | 0.883534 | 9.181899 | -4.69648 | 1.06E-05 | 2.87E-05 | 2.645594 |
| SPRYD7   | -0.21621 | 0.860823 | 4.914684 | -4.69596 | 1.06E-05 | 2.87E-05 | 2.643673 |
| ARMCX3   | 0.226318 | 1.169845 | 7.69519  | 4.695157 | 1.07E-05 | 2.88E-05 | 2.640693 |
| RETSAT   | -0.3751  | 0.771053 | 9.401139 | -4.69499 | 1.07E-05 | 2.88E-05 | 2.64007  |
| CD180    | 0.228426 | 1.171556 | 4.809114 | 4.692427 | 1.08E-05 | 2.91E-05 | 2.63056  |
| FAU      | 0.195494 | 1.145116 | 11.95253 | 4.689422 | 1.09E-05 | 2.94E-05 | 2.619414 |
| CD9      | 0.388814 | 1.309317 | 9.976329 | 4.688368 | 1.09E-05 | 2.95E-05 | 2.615505 |
| SLC16A7  | -0.35993 | 0.779204 | 5.812911 | -4.68787 | 1.10E-05 | 2.96E-05 | 2.613672 |
| RDH11    | -0.23431 | 0.850092 | 9.417342 | -4.68351 | 1.12E-05 | 3.00E-05 | 2.597502 |
| CFAP45   | -0.22108 | 0.857923 | 6.317215 | -4.68106 | 1.13E-05 | 3.03E-05 | 2.588402 |
| GAB2     | 0.187101 | 1.138474 | 6.087722 | 4.680279 | 1.13E-05 | 3.04E-05 | 2.585522 |
| IRAK1    | 0.257062 | 1.195042 | 9.166076 | 4.678663 | 1.14E-05 | 3.06E-05 | 2.579536 |
| EDRF1    | 0.183162 | 1.13537  | 5.266076 | 4.678561 | 1.14E-05 | 3.06E-05 | 2.579161 |
| CDKN3    | 0.275132 | 1.210105 | 4.729494 | 4.676444 | 1.15E-05 | 3.08E-05 | 2.571318 |
| FMO1     | -0.67854 | 0.624798 | 11.05873 | -4.67607 | 1.15E-05 | 3.09E-05 | 2.569947 |
| MMP1     | 0.338452 | 1.264399 | 3.758987 | 4.6759   | 1.15E-05 | 3.09E-05 | 2.569305 |
| TRAPPC2L | -0.17254 | 0.887277 | 7.945316 | -4.67495 | 1.15E-05 | 3.10E-05 | 2.565803 |
| ZC2HC1C  | -0.21167 | 0.863535 | 5.878101 | -4.6706  | 1.17E-05 | 3.15E-05 | 2.549693 |



|          |          |          |          |          |          |          |          |
|----------|----------|----------|----------|----------|----------|----------|----------|
| TSPAN7   | -0.32804 | 0.79662  | 7.819494 | -4.66999 | 1.17E-05 | 3.15E-05 | 2.547432 |
| DLG5     | 0.274941 | 1.209944 | 6.623544 | 4.668258 | 1.18E-05 | 3.17E-05 | 2.541023 |
| TMEM246  | 0.29081  | 1.223327 | 5.624304 | 4.668206 | 1.18E-05 | 3.17E-05 | 2.540829 |
| MIA2     | -0.20831 | 0.865548 | 4.413418 | -4.66705 | 1.19E-05 | 3.19E-05 | 2.536548 |
| RIC8A    | 0.15303  | 1.111903 | 8.143924 | 4.666976 | 1.19E-05 | 3.19E-05 | 2.536279 |
| IFNA10   | 0.26475  | 1.201428 | 4.253418 | 4.666233 | 1.19E-05 | 3.19E-05 | 2.53353  |
| NTRK2    | 0.237661 | 1.17908  | 4.919494 | 4.664358 | 1.20E-05 | 3.22E-05 | 2.526598 |
| SGK2     | -0.42696 | 0.743829 | 7.498608 | -4.6641  | 1.20E-05 | 3.22E-05 | 2.525654 |
| SCAF8    | 0.210613 | 1.157179 | 7.626456 | 4.662627 | 1.21E-05 | 3.24E-05 | 2.5202   |
| ZFC3H1   | 0.223709 | 1.167732 | 6.896709 | 4.661674 | 1.21E-05 | 3.25E-05 | 2.516677 |
| BAIAP3   | -0.18655 | 0.878706 | 6.574684 | -4.66145 | 1.21E-05 | 3.25E-05 | 2.515829 |
| NOX5     | -0.17119 | 0.888108 | 5.793924 | -4.66049 | 1.22E-05 | 3.26E-05 | 2.512316 |
| GTF3C1   | -0.18922 | 0.877082 | 7.489873 | -4.66019 | 1.22E-05 | 3.26E-05 | 2.511203 |
| DNM1L    | 0.199717 | 1.148473 | 7.038861 | 4.659372 | 1.22E-05 | 3.27E-05 | 2.508169 |
| CBR3     | 0.278972 | 1.21333  | 5.393924 | 4.65864  | 1.23E-05 | 3.28E-05 | 2.505463 |
| GMFB     | 0.23747  | 1.178924 | 8.083544 | 4.658214 | 1.23E-05 | 3.28E-05 | 2.503888 |
| RASGRP1  | 0.49226  | 1.406646 | 6.313671 | 4.657467 | 1.23E-05 | 3.29E-05 | 2.50113  |
| KLHL20   | -0.22159 | 0.857617 | 5.925696 | -4.65746 | 1.23E-05 | 3.29E-05 | 2.501116 |
| CGA      | -0.49035 | 0.711853 | 5.495823 | -4.65691 | 1.23E-05 | 3.30E-05 | 2.499063 |
| ATP2C2   | -0.33868 | 0.790763 | 5.094177 | -4.65639 | 1.24E-05 | 3.30E-05 | 2.497136 |
| GCNT2    | -0.22293 | 0.856823 | 5.344051 | -4.65491 | 1.24E-05 | 3.32E-05 | 2.491684 |
| SLC9A3   | -0.18628 | 0.878866 | 4.473924 | -4.65188 | 1.26E-05 | 3.36E-05 | 2.480507 |
| AKAP3    | -0.20828 | 0.865568 | 5.245823 | -4.65183 | 1.26E-05 | 3.36E-05 | 2.480315 |
| UBP1     | 0.26359  | 1.200462 | 7.000759 | 4.650355 | 1.27E-05 | 3.38E-05 | 2.474865 |
| MAP6D1   | -0.19353 | 0.874463 | 5.59481  | -4.64957 | 1.27E-05 | 3.39E-05 | 2.471966 |
| C6orf15  | -0.28497 | 0.82076  | 6.468354 | -4.64876 | 1.27E-05 | 3.39E-05 | 2.468986 |
| C8B      | -0.21575 | 0.861098 | 5.528354 | -4.64866 | 1.27E-05 | 3.39E-05 | 2.468598 |
| RNASEL   | 0.225389 | 1.169092 | 6.479367 | 4.648084 | 1.28E-05 | 3.40E-05 | 2.466485 |
| DDX1     | -0.15304 | 0.899355 | 9.677595 | -4.64741 | 1.28E-05 | 3.41E-05 | 2.463995 |
| TRAT1    | 0.284638 | 1.218104 | 3.697595 | 4.647363 | 1.28E-05 | 3.41E-05 | 2.463825 |
| CBR4     | -0.26808 | 0.830426 | 8.033671 | -4.6469  | 1.28E-05 | 3.41E-05 | 2.462099 |
| TTLL1    | 0.226891 | 1.17031  | 5.943038 | 4.645699 | 1.29E-05 | 3.43E-05 | 2.457684 |
| PPP1R15A | -0.33381 | 0.79344  | 5.970127 | -4.64564 | 1.29E-05 | 3.43E-05 | 2.457457 |
| ZNF184   | -0.28499 | 0.820745 | 5.88443  | -4.64525 | 1.29E-05 | 3.43E-05 | 2.456018 |
| CDKN1B   | 0.336548 | 1.262732 | 8.087975 | 4.644989 | 1.29E-05 | 3.43E-05 | 2.455068 |
| PTGES    | 0.226772 | 1.170214 | 5.58038  | 4.644984 | 1.29E-05 | 3.43E-05 | 2.455048 |
| HBQ1     | -0.21661 | 0.860583 | 5.127342 | -4.64489 | 1.29E-05 | 3.43E-05 | 2.454687 |
| STAM     | 0.261258 | 1.198524 | 7.228481 | 4.643294 | 1.30E-05 | 3.45E-05 | 2.448816 |
| ZNHIT2   | -0.16852 | 0.889756 | 5.697215 | -4.64131 | 1.31E-05 | 3.48E-05 | 2.441514 |
| DSG2     | 0.337115 | 1.263228 | 8.277342 | 4.639441 | 1.32E-05 | 3.50E-05 | 2.434608 |
| ZNF112   | 0.242721 | 1.183222 | 4.862911 | 4.637679 | 1.33E-05 | 3.52E-05 | 2.428113 |
| UQCR11   | -0.15918 | 0.895536 | 9.913291 | -4.63754 | 1.33E-05 | 3.53E-05 | 2.427621 |
| PSENNEN  | 0.245283 | 1.185325 | 7.932025 | 4.63748  | 1.33E-05 | 3.53E-05 | 2.427381 |
| HYAL2    | 0.212055 | 1.158337 | 7.133797 | 4.63594  | 1.34E-05 | 3.55E-05 | 2.421707 |
| MCM6     | 0.29143  | 1.223852 | 5.901519 | 4.63397  | 1.35E-05 | 3.57E-05 | 2.41445  |
| LAMB1    | 0.307787 | 1.237807 | 7.819873 | 4.63383  | 1.35E-05 | 3.57E-05 | 2.413934 |
| SLC4A1   | -0.51524 | 0.699675 | 8.326076 | -4.63145 | 1.36E-05 | 3.60E-05 | 2.405171 |

|          |          |          |          |          |          |          |          |
|----------|----------|----------|----------|----------|----------|----------|----------|
| H1FX     | 0.308959 | 1.238814 | 6.179494 | 4.627251 | 1.38E-05 | 3.66E-05 | 2.389711 |
| TBC1D9   | 0.30643  | 1.236643 | 7.502785 | 4.626943 | 1.38E-05 | 3.66E-05 | 2.388577 |
| EHD1     | -0.18534 | 0.87944  | 7.036709 | -4.62615 | 1.39E-05 | 3.67E-05 | 2.385676 |
| THAP1    | 0.247569 | 1.187205 | 5.894937 | 4.624616 | 1.40E-05 | 3.69E-05 | 2.380014 |
| SND1     | 0.197899 | 1.147026 | 8.388101 | 4.62186  | 1.41E-05 | 3.73E-05 | 2.369876 |
| STEAP4   | 0.324137 | 1.251915 | 4.019747 | 4.620743 | 1.42E-05 | 3.75E-05 | 2.365767 |
| BIN2     | 0.364592 | 1.287517 | 5.391646 | 4.620197 | 1.42E-05 | 3.75E-05 | 2.363758 |
| GPR171   | 0.411542 | 1.330106 | 4.345823 | 4.616183 | 1.44E-05 | 3.81E-05 | 2.349002 |
| ACE      | -0.27329 | 0.827432 | 4.95519  | -4.61581 | 1.44E-05 | 3.81E-05 | 2.347635 |
| SDF2L1   | 0.329506 | 1.256583 | 7.871772 | 4.615365 | 1.45E-05 | 3.82E-05 | 2.345994 |
| ARHGAP17 | 0.194783 | 1.144552 | 7.286582 | 4.615076 | 1.45E-05 | 3.82E-05 | 2.344933 |
| RPF1     | 0.174453 | 1.128537 | 9.024177 | 4.614038 | 1.45E-05 | 3.84E-05 | 2.341118 |
| PLEKHG6  | -0.20326 | 0.868585 | 4.698354 | -4.61377 | 1.46E-05 | 3.84E-05 | 2.340146 |
| UNC13B   | -0.20225 | 0.869192 | 8.475949 | -4.6085  | 1.49E-05 | 3.92E-05 | 2.320792 |
| BTN3A1   | 0.219776 | 1.164553 | 5.973544 | 4.608388 | 1.49E-05 | 3.92E-05 | 2.320365 |
| TTF2     | 0.210072 | 1.156746 | 4.041013 | 4.607739 | 1.49E-05 | 3.92E-05 | 2.317982 |
| TACC2    | -0.33339 | 0.793668 | 7.03443  | -4.60737 | 1.49E-05 | 3.93E-05 | 2.316629 |
| HMGB3    | 0.245639 | 1.185618 | 7.02     | 4.605503 | 1.50E-05 | 3.96E-05 | 2.309776 |
| NXF1     | 0.204526 | 1.152307 | 7.41     | 4.604823 | 1.51E-05 | 3.96E-05 | 2.307278 |
| STXBP1   | 0.24054  | 1.181435 | 7.235696 | 4.604548 | 1.51E-05 | 3.97E-05 | 2.30627  |
| CLPS     | -0.19233 | 0.875194 | 4.596835 | -4.60222 | 1.52E-05 | 4.00E-05 | 2.297717 |
| P4HTM    | -0.20852 | 0.865426 | 8.070506 | -4.60109 | 1.53E-05 | 4.02E-05 | 2.293579 |
| GPSM2    | 0.199335 | 1.148169 | 5.066962 | 4.600405 | 1.53E-05 | 4.03E-05 | 2.29107  |
| SLC2A8   | -0.17876 | 0.883461 | 6.219241 | -4.60022 | 1.53E-05 | 4.03E-05 | 2.290375 |
| NGF      | -0.21551 | 0.861239 | 5.133671 | -4.59967 | 1.54E-05 | 4.03E-05 | 2.288367 |
| SEC24C   | 0.193636 | 1.143643 | 7.480886 | 4.599654 | 1.54E-05 | 4.03E-05 | 2.288314 |
| SC5D     | -0.16812 | 0.89     | 6.266076 | -4.59613 | 1.56E-05 | 4.09E-05 | 2.275399 |
| SULT1B1  | -0.21848 | 0.859472 | 5.447215 | -4.596   | 1.56E-05 | 4.09E-05 | 2.274929 |
| THOC6    | 0.230145 | 1.172953 | 5.902658 | 4.595267 | 1.56E-05 | 4.10E-05 | 2.272228 |
| MCF2L    | -0.17781 | 0.884046 | 6.898987 | -4.59465 | 1.57E-05 | 4.11E-05 | 2.269978 |
| HLA-DOB  | 0.271113 | 1.206739 | 5.716076 | 4.594027 | 1.57E-05 | 4.11E-05 | 2.267684 |
| GNB3     | -0.21716 | 0.860257 | 6.273418 | -4.59398 | 1.57E-05 | 4.11E-05 | 2.267515 |
| CNPY3    | 0.227141 | 1.170513 | 6.155316 | 4.593789 | 1.57E-05 | 4.12E-05 | 2.266812 |
| STK32B   | -0.31993 | 0.80111  | 7.37962  | -4.59323 | 1.57E-05 | 4.12E-05 | 2.26478  |
| ZBTB48   | -0.17949 | 0.883013 | 5.627848 | -4.59269 | 1.58E-05 | 4.13E-05 | 2.262771 |
| RTCA     | -0.31182 | 0.805626 | 8.989747 | -4.59147 | 1.59E-05 | 4.15E-05 | 2.258322 |
| MYL7     | -0.21529 | 0.861373 | 5.782025 | -4.58454 | 1.63E-05 | 4.26E-05 | 2.23295  |
| HPSE     | 0.329328 | 1.256428 | 5.152785 | 4.58319  | 1.64E-05 | 4.28E-05 | 2.227991 |
| ARR3     | -0.26377 | 0.832906 | 6.181772 | -4.58297 | 1.64E-05 | 4.28E-05 | 2.227192 |
| NFATC4   | -0.16328 | 0.892992 | 5.74962  | -4.58254 | 1.64E-05 | 4.29E-05 | 2.225603 |
| SLC22A18 | -0.60528 | 0.657345 | 9.976076 | -4.58236 | 1.64E-05 | 4.29E-05 | 2.224945 |
| GGCX     | -0.15918 | 0.895532 | 6.81481  | -4.58208 | 1.64E-05 | 4.29E-05 | 2.223927 |
| NFE2L2   | 0.254717 | 1.193101 | 9.296835 | 4.581095 | 1.65E-05 | 4.31E-05 | 2.220328 |
| FIS1     | -0.16455 | 0.89221  | 9.881266 | -4.58007 | 1.66E-05 | 4.32E-05 | 2.216587 |
| PRKCI    | 0.256225 | 1.19435  | 7.968987 | 4.579682 | 1.66E-05 | 4.33E-05 | 2.215158 |
| TAP2     | 0.169137 | 1.124386 | 5.21     | 4.578168 | 1.67E-05 | 4.35E-05 | 2.209618 |
| POLR2H   | -0.15664 | 0.897112 | 8.358481 | -4.57802 | 1.67E-05 | 4.35E-05 | 2.209081 |

|          |          |          |          |          |          |          |          |
|----------|----------|----------|----------|----------|----------|----------|----------|
| HNRNPA3  | 0.189144 | 1.140087 | 7.816835 | 4.57726  | 1.67E-05 | 4.36E-05 | 2.206296 |
| SIRT4    | -0.18099 | 0.882099 | 4.762658 | -4.57713 | 1.67E-05 | 4.36E-05 | 2.205823 |
| SPCS3    | 0.258702 | 1.196402 | 7.807848 | 4.576152 | 1.68E-05 | 4.38E-05 | 2.202245 |
| CCDC91   | 0.23444  | 1.17645  | 6.532278 | 4.574355 | 1.69E-05 | 4.41E-05 | 2.195677 |
| TOPBP1   | 0.20807  | 1.155142 | 5.902785 | 4.572156 | 1.71E-05 | 4.44E-05 | 2.187637 |
| BUD31    | 0.225422 | 1.169119 | 8.081772 | 4.570195 | 1.72E-05 | 4.47E-05 | 2.180469 |
| CCNH     | -0.17738 | 0.884305 | 8.461772 | -4.56903 | 1.73E-05 | 4.49E-05 | 2.176209 |
| TERT     | -0.18764 | 0.878044 | 5.055316 | -4.56825 | 1.73E-05 | 4.51E-05 | 2.173365 |
| IL15     | 0.169842 | 1.124935 | 4.307468 | 4.567463 | 1.74E-05 | 4.52E-05 | 2.170489 |
| UGT2A3   | -0.43534 | 0.739522 | 7.690759 | -4.56715 | 1.74E-05 | 4.52E-05 | 2.169345 |
| ZNF165   | -0.47841 | 0.717767 | 4.683418 | -4.56634 | 1.74E-05 | 4.53E-05 | 2.166395 |
| CRTAP    | -0.19733 | 0.872166 | 7.539747 | -4.56538 | 1.75E-05 | 4.55E-05 | 2.162885 |
| PPID     | 0.263366 | 1.200276 | 7.812405 | 4.563096 | 1.77E-05 | 4.59E-05 | 2.154544 |
| KLHDC4   | -0.19252 | 0.875078 | 6.000886 | -4.56276 | 1.77E-05 | 4.59E-05 | 2.153303 |
| KIN      | 0.207516 | 1.154699 | 4.71038  | 4.56245  | 1.77E-05 | 4.60E-05 | 2.152187 |
| PLA2R1   | -0.32439 | 0.798637 | 4.207975 | -4.56197 | 1.77E-05 | 4.60E-05 | 2.150432 |
| PARG     | -0.20939 | 0.864904 | 7.651013 | -4.561   | 1.78E-05 | 4.62E-05 | 2.146875 |
| HAO1     | -0.31497 | 0.803869 | 4.475823 | -4.56083 | 1.78E-05 | 4.62E-05 | 2.146262 |
| ABCD4    | -0.1658  | 0.891432 | 6.101392 | -4.56037 | 1.78E-05 | 4.63E-05 | 2.144604 |
| PLAGL2   | -0.17014 | 0.888757 | 5.650886 | -4.56025 | 1.78E-05 | 4.63E-05 | 2.144169 |
| CDKN2C   | -0.18421 | 0.880131 | 6.355443 | -4.55997 | 1.79E-05 | 4.63E-05 | 2.143145 |
| IGHV4-34 | 0.782721 | 1.720372 | 5.038481 | 4.558776 | 1.79E-05 | 4.65E-05 | 2.138778 |
| CEBPE    | -0.19257 | 0.875046 | 4.843038 | -4.55856 | 1.80E-05 | 4.65E-05 | 2.138007 |
| GLT8D2   | 0.348781 | 1.273484 | 5.487215 | 4.555989 | 1.81E-05 | 4.70E-05 | 2.128611 |
| GJA1     | 0.694829 | 1.618692 | 7.28481  | 4.554696 | 1.82E-05 | 4.72E-05 | 2.123894 |
| C2orf54  | -0.47023 | 0.721849 | 5.586835 | -4.55456 | 1.82E-05 | 4.72E-05 | 2.123393 |
| IQCC     | -0.2065  | 0.866636 | 5.255696 | -4.5529  | 1.84E-05 | 4.75E-05 | 2.117341 |
| DSTN     | 0.148524 | 1.108435 | 11.51291 | 4.55285  | 1.84E-05 | 4.75E-05 | 2.117165 |
| SMUG1    | -0.22825 | 0.853667 | 6.371392 | -4.55261 | 1.84E-05 | 4.75E-05 | 2.116275 |
| TUBB2A   | -0.40266 | 0.756462 | 9.716582 | -4.55131 | 1.85E-05 | 4.77E-05 | 2.111553 |
| SLC33A1  | -0.23981 | 0.846857 | 6.925696 | -4.55073 | 1.85E-05 | 4.78E-05 | 2.109427 |
| CBX3     | 0.273485 | 1.208724 | 7.869241 | 4.550495 | 1.85E-05 | 4.78E-05 | 2.10858  |
| EIF3D    | 0.212747 | 1.158893 | 9.424304 | 4.550266 | 1.85E-05 | 4.79E-05 | 2.107744 |
| RGS7     | -0.57964 | 0.669129 | 4.925696 | -4.54965 | 1.86E-05 | 4.80E-05 | 2.105494 |
| USP14    | 0.144921 | 1.10567  | 7.993797 | 4.549332 | 1.86E-05 | 4.80E-05 | 2.104342 |
| RHOH     | 0.337721 | 1.263758 | 5.917595 | 4.54887  | 1.86E-05 | 4.81E-05 | 2.102659 |
| WNK1     | -0.24159 | 0.84581  | 8.377342 | -4.54802 | 1.87E-05 | 4.82E-05 | 2.099545 |
| HAUS7    | -0.49825 | 0.707966 | 6.307089 | -4.54791 | 1.87E-05 | 4.82E-05 | 2.099168 |
| TFF3     | 0.376957 | 1.298599 | 5.710506 | 4.546778 | 1.88E-05 | 4.84E-05 | 2.095035 |
| PDK3     | -0.16864 | 0.889683 | 6.324557 | -4.5461  | 1.88E-05 | 4.85E-05 | 2.092556 |
| LRRC3    | -0.14289 | 0.905706 | 4.196835 | -4.54354 | 1.90E-05 | 4.90E-05 | 2.083247 |
| ZNF84    | 0.223379 | 1.167465 | 5.532658 | 4.543518 | 1.90E-05 | 4.90E-05 | 2.083162 |
| GPS2     | -0.23366 | 0.850473 | 7.448481 | -4.54074 | 1.92E-05 | 4.95E-05 | 2.073037 |
| RWDD2B   | -0.16514 | 0.891839 | 7.979494 | -4.53937 | 1.93E-05 | 4.97E-05 | 2.068074 |
| PTPRT    | -0.22875 | 0.853375 | 5.425316 | -4.53844 | 1.94E-05 | 4.99E-05 | 2.064681 |
| HNRNPF   | 0.195349 | 1.145001 | 8.195949 | 4.538181 | 1.94E-05 | 4.99E-05 | 2.063737 |
| PAPD7    | 0.204216 | 1.15206  | 7.211392 | 4.53489  | 1.96E-05 | 5.05E-05 | 2.051763 |

|         |          |          |          |          |          |          |          |
|---------|----------|----------|----------|----------|----------|----------|----------|
| MYO1B   | 0.268999 | 1.204971 | 7.703671 | 4.534383 | 1.97E-05 | 5.06E-05 | 2.049919 |
| GPR3    | -0.21173 | 0.8635   | 5.141772 | -4.53382 | 1.97E-05 | 5.07E-05 | 2.047875 |
| CYBRD1  | 0.370191 | 1.292524 | 5.710506 | 4.52959  | 2.00E-05 | 5.15E-05 | 2.032494 |
| TJP1    | 0.240026 | 1.181014 | 7.994177 | 4.526058 | 2.03E-05 | 5.22E-05 | 2.019658 |
| CCT6A   | 0.232121 | 1.174561 | 7.926962 | 4.524114 | 2.05E-05 | 5.25E-05 | 2.012597 |
| CARKD   | -0.19821 | 0.871628 | 8.93481  | -4.52406 | 2.05E-05 | 5.25E-05 | 2.012387 |
| LCN1    | -0.22655 | 0.854677 | 4.587975 | -4.52385 | 2.05E-05 | 5.25E-05 | 2.011653 |
| MGRN1   | 0.17774  | 1.131111 | 7.796203 | 4.523318 | 2.05E-05 | 5.26E-05 | 2.009707 |
| SERINC3 | 0.207872 | 1.154983 | 8.628354 | 4.523107 | 2.05E-05 | 5.27E-05 | 2.008939 |
| NOP10   | 0.163221 | 1.119785 | 10.32405 | 4.522886 | 2.06E-05 | 5.27E-05 | 2.008138 |
| CD164   | -0.26377 | 0.832906 | 10.11177 | -4.52179 | 2.06E-05 | 5.29E-05 | 2.004159 |
| CKM     | -0.18268 | 0.881064 | 4.633038 | -4.51976 | 2.08E-05 | 5.33E-05 | 1.996788 |
| ZNF266  | 0.308814 | 1.238689 | 6.892911 | 4.519397 | 2.08E-05 | 5.33E-05 | 1.995469 |
| METTL4  | 0.173636 | 1.127898 | 5.162532 | 4.519334 | 2.08E-05 | 5.33E-05 | 1.995241 |
| WDR61   | -0.17637 | 0.884927 | 8.867848 | -4.51643 | 2.11E-05 | 5.39E-05 | 1.984713 |
| LHB     | -0.22003 | 0.85855  | 5.644177 | -4.51607 | 2.11E-05 | 5.40E-05 | 1.983394 |
| RPL28   | 0.167207 | 1.122882 | 7.855063 | 4.515296 | 2.12E-05 | 5.41E-05 | 1.980587 |
| TSC22D4 | -0.20949 | 0.864841 | 5.845316 | -4.51528 | 2.12E-05 | 5.41E-05 | 1.980523 |
| VRK1    | 0.210863 | 1.15738  | 5.528734 | 4.514947 | 2.12E-05 | 5.41E-05 | 1.979323 |
| FAM76A  | -0.18322 | 0.880734 | 4.847595 | -4.51374 | 2.13E-05 | 5.44E-05 | 1.974931 |
| ME3     | -0.27412 | 0.826956 | 6.526582 | -4.51165 | 2.14E-05 | 5.48E-05 | 1.967375 |
| ZMAT5   | -0.16601 | 0.891302 | 6.46     | -4.51155 | 2.15E-05 | 5.48E-05 | 1.967005 |
| FAM98A  | 0.260968 | 1.198283 | 8.535316 | 4.511125 | 2.15E-05 | 5.49E-05 | 1.96546  |
| S100A2  | 0.844018 | 1.795043 | 9.474304 | 4.511013 | 2.15E-05 | 5.49E-05 | 1.965052 |
| PSMB5   | -0.19947 | 0.870873 | 9.723418 | -4.50567 | 2.19E-05 | 5.60E-05 | 1.945673 |
| DAPK2   | -0.15359 | 0.89901  | 4.99519  | -4.50549 | 2.19E-05 | 5.60E-05 | 1.945041 |
| SP3     | 0.291324 | 1.223763 | 7.415823 | 4.505022 | 2.20E-05 | 5.61E-05 | 1.943339 |
| RARG    | -0.18278 | 0.881004 | 7.015823 | -4.5027  | 2.22E-05 | 5.65E-05 | 1.934942 |
| TOPORS  | -0.19233 | 0.875194 | 5.806835 | -4.4995  | 2.24E-05 | 5.72E-05 | 1.923335 |
| LRRC8D  | -0.21871 | 0.859334 | 8.70038  | -4.49906 | 2.25E-05 | 5.73E-05 | 1.921757 |
| NDST2   | 0.189177 | 1.140113 | 6.969241 | 4.498981 | 2.25E-05 | 5.73E-05 | 1.921461 |
| GSR     | -0.27526 | 0.826303 | 7.819367 | -4.49867 | 2.25E-05 | 5.73E-05 | 1.920354 |
| USP34   | 0.184723 | 1.136599 | 7.036076 | 4.495186 | 2.28E-05 | 5.81E-05 | 1.907729 |
| LAT     | 0.226667 | 1.170128 | 5.244684 | 4.494752 | 2.29E-05 | 5.82E-05 | 1.906159 |
| MMADHC  | -0.18136 | 0.881873 | 9.877722 | -4.49177 | 2.31E-05 | 5.88E-05 | 1.895374 |
| LARP7   | 0.241561 | 1.182271 | 7.550253 | 4.488747 | 2.34E-05 | 5.94E-05 | 1.88444  |
| MFHAS1  | 0.296515 | 1.228174 | 6.898861 | 4.488233 | 2.34E-05 | 5.95E-05 | 1.882584 |
| SP140   | 0.238755 | 1.179974 | 4.187342 | 4.487038 | 2.35E-05 | 5.98E-05 | 1.878263 |
| AMBN    | -0.18559 | 0.879292 | 4.482911 | -4.48568 | 2.36E-05 | 6.01E-05 | 1.873361 |
| ZFP30   | 0.200501 | 1.149097 | 6.028101 | 4.484084 | 2.38E-05 | 6.04E-05 | 1.867588 |
| ERBB3   | -0.31511 | 0.803792 | 8.047722 | -4.48188 | 2.40E-05 | 6.09E-05 | 1.859629 |
| HOXB7   | 0.275336 | 1.210276 | 7.732405 | 4.481715 | 2.40E-05 | 6.09E-05 | 1.859031 |
| CLCNKB  | -0.41101 | 0.752094 | 8.132658 | -4.48026 | 2.41E-05 | 6.12E-05 | 1.853783 |
| SLC35B1 | -0.19236 | 0.875174 | 8.42443  | -4.47991 | 2.42E-05 | 6.13E-05 | 1.852531 |
| RAB8A   | 0.211166 | 1.157623 | 9.058861 | 4.479912 | 2.42E-05 | 6.13E-05 | 1.852521 |
| C1orf95 | -0.21019 | 0.864423 | 5.556329 | -4.47984 | 2.42E-05 | 6.13E-05 | 1.852256 |
| BANK1   | 0.262009 | 1.199148 | 4.925316 | 4.478801 | 2.43E-05 | 6.15E-05 | 1.84851  |

|          |          |          |          |          |          |          |          |
|----------|----------|----------|----------|----------|----------|----------|----------|
| EIF6     | -0.16797 | 0.890094 | 9.601139 | -4.4785  | 2.43E-05 | 6.16E-05 | 1.847427 |
| PLEKHF1  | 0.230896 | 1.173564 | 6.279494 | 4.478286 | 2.43E-05 | 6.16E-05 | 1.846651 |
| MFN1     | 0.205777 | 1.153308 | 6.091392 | 4.477313 | 2.44E-05 | 6.18E-05 | 1.843139 |
| PLS1     | 0.244506 | 1.184687 | 8.771266 | 4.475545 | 2.46E-05 | 6.22E-05 | 1.836755 |
| PROP1    | -0.2208  | 0.858091 | 5.261899 | -4.47531 | 2.46E-05 | 6.22E-05 | 1.83591  |
| HHLA3    | -0.26848 | 0.830191 | 5.247848 | -4.47442 | 2.47E-05 | 6.24E-05 | 1.832704 |
| GTF3C4   | 0.194664 | 1.144458 | 6.533924 | 4.471948 | 2.49E-05 | 6.30E-05 | 1.823778 |
| KPNB1    | 0.20722  | 1.154461 | 8.738734 | 4.471812 | 2.49E-05 | 6.30E-05 | 1.823287 |
| TOR1B    | 0.182536 | 1.134877 | 6.91038  | 4.47169  | 2.49E-05 | 6.30E-05 | 1.822848 |
| DPEP2    | 0.267892 | 1.204047 | 4.428861 | 4.470994 | 2.50E-05 | 6.31E-05 | 1.820338 |
| ATP5G2   | -0.18524 | 0.879504 | 10.25241 | -4.47098 | 2.50E-05 | 6.31E-05 | 1.820279 |
| WWC1     | 0.259677 | 1.197211 | 7.893038 | 4.470622 | 2.50E-05 | 6.32E-05 | 1.818996 |
| CEP192   | 0.247464 | 1.187118 | 5.429241 | 4.469925 | 2.51E-05 | 6.33E-05 | 1.816485 |
| HOXB2    | 0.308551 | 1.238463 | 8.783671 | 4.46852  | 2.52E-05 | 6.37E-05 | 1.811417 |
| PPWD1    | 0.264361 | 1.201104 | 5.643038 | 4.468347 | 2.52E-05 | 6.37E-05 | 1.810792 |
| USP5     | -0.21599 | 0.860952 | 6.184557 | -4.46814 | 2.53E-05 | 6.37E-05 | 1.810063 |
| CLCC1    | 0.162319 | 1.119084 | 5.032152 | 4.467164 | 2.53E-05 | 6.39E-05 | 1.806528 |
| C7orf43  | -0.18376 | 0.880405 | 6.192152 | -4.46497 | 2.56E-05 | 6.44E-05 | 1.798607 |
| PTDSS2   | -0.20014 | 0.870467 | 6.848354 | -4.46296 | 2.58E-05 | 6.49E-05 | 1.791363 |
| KCNA6    | -0.21478 | 0.86168  | 5.253544 | -4.46282 | 2.58E-05 | 6.49E-05 | 1.790872 |
| MORF4L2  | 0.172233 | 1.126801 | 11.47608 | 4.461282 | 2.59E-05 | 6.53E-05 | 1.785335 |
| RHCE     | -0.22662 | 0.854634 | 4.864684 | -4.4604  | 2.60E-05 | 6.55E-05 | 1.782147 |
| C8orf33  | 0.283986 | 1.217554 | 5.977975 | 4.460027 | 2.60E-05 | 6.55E-05 | 1.780817 |
| TPP2     | 0.17749  | 1.130915 | 6.863924 | 4.458979 | 2.61E-05 | 6.58E-05 | 1.777042 |
| UBL3     | -0.22711 | 0.854342 | 8.528608 | -4.45772 | 2.63E-05 | 6.61E-05 | 1.772506 |
| HABP2    | 0.787233 | 1.725762 | 7.217975 | 4.455133 | 2.65E-05 | 6.67E-05 | 1.763199 |
| PUS7L    | 0.17195  | 1.12658  | 5.651392 | 4.454388 | 2.66E-05 | 6.69E-05 | 1.760515 |
| ETV7     | -0.21044 | 0.864273 | 5.654051 | -4.45149 | 2.69E-05 | 6.76E-05 | 1.7501   |
| ECM2     | -0.4537  | 0.730167 | 7.505696 | -4.451   | 2.69E-05 | 6.77E-05 | 1.748319 |
| APOA4    | -0.20182 | 0.86945  | 5.347215 | -4.44981 | 2.70E-05 | 6.80E-05 | 1.744056 |
| EIF2B2   | -0.19419 | 0.874064 | 8.096709 | -4.44785 | 2.72E-05 | 6.84E-05 | 1.736988 |
| SLC22A17 | -0.23046 | 0.852362 | 7.120253 | -4.44707 | 2.73E-05 | 6.86E-05 | 1.73419  |
| POLL     | -0.16739 | 0.890451 | 6.007468 | -4.44706 | 2.73E-05 | 6.86E-05 | 1.734147 |
| OSTF1    | 0.327187 | 1.254565 | 8.156456 | 4.446261 | 2.74E-05 | 6.88E-05 | 1.731289 |
| GNG7     | -0.17937 | 0.883086 | 6.380506 | -4.44551 | 2.75E-05 | 6.90E-05 | 1.728592 |
| FANCF    | 0.210507 | 1.157095 | 6.410759 | 4.443278 | 2.77E-05 | 6.95E-05 | 1.720567 |
| SPSB1    | -0.35289 | 0.783013 | 5.360633 | -4.44265 | 2.78E-05 | 6.97E-05 | 1.718324 |
| PRMT1    | 0.158491 | 1.116119 | 7.334684 | 4.439083 | 2.82E-05 | 7.06E-05 | 1.705501 |
| ARL15    | -0.22487 | 0.855669 | 4.892152 | -4.43854 | 2.82E-05 | 7.07E-05 | 1.703547 |
| FPR1     | 0.544209 | 1.458221 | 5.964937 | 4.437602 | 2.83E-05 | 7.09E-05 | 1.700181 |
| TPX2     | 0.288307 | 1.221206 | 4.621519 | 4.437596 | 2.83E-05 | 7.09E-05 | 1.70016  |
| TKT      | 0.385863 | 1.306641 | 8.546835 | 4.437219 | 2.84E-05 | 7.10E-05 | 1.698806 |
| SMC3     | 0.244974 | 1.185071 | 5.363418 | 4.437015 | 2.84E-05 | 7.10E-05 | 1.698077 |
| TMEM14A  | -0.24316 | 0.844891 | 9.668861 | -4.43607 | 2.85E-05 | 7.12E-05 | 1.694699 |
| MGA      | 0.250514 | 1.189631 | 5.815949 | 4.434911 | 2.86E-05 | 7.15E-05 | 1.690523 |
| C21orf2  | -0.18773 | 0.877984 | 6.338101 | -4.43451 | 2.86E-05 | 7.16E-05 | 1.68907  |
| SFXN3    | -0.21546 | 0.861271 | 7.281519 | -4.43296 | 2.88E-05 | 7.20E-05 | 1.683523 |

|          |          |          |          |          |          |          |          |
|----------|----------|----------|----------|----------|----------|----------|----------|
| RBM28    | 0.184111 | 1.136116 | 5.977342 | 4.432322 | 2.89E-05 | 7.22E-05 | 1.681233 |
| ME2      | 0.20002  | 1.148714 | 7.408987 | 4.430277 | 2.91E-05 | 7.27E-05 | 1.673898 |
| NUP54    | 0.202615 | 1.150783 | 7.210506 | 4.429469 | 2.92E-05 | 7.29E-05 | 1.671001 |
| PLCE1    | -0.32085 | 0.800598 | 5.172278 | -4.42589 | 2.96E-05 | 7.38E-05 | 1.658176 |
| PPARGC1A | -0.3741  | 0.771588 | 7.770253 | -4.42544 | 2.96E-05 | 7.40E-05 | 1.656541 |
| CREB5    | 0.421831 | 1.339627 | 4.943165 | 4.425037 | 2.97E-05 | 7.40E-05 | 1.655112 |
| BEST1    | -0.20838 | 0.865509 | 5.468608 | -4.42436 | 2.97E-05 | 7.42E-05 | 1.652671 |
| CECR5    | -0.18438 | 0.880027 | 7.564937 | -4.42333 | 2.99E-05 | 7.45E-05 | 1.648989 |
| DICER1   | 0.228544 | 1.171652 | 7.371772 | 4.422922 | 2.99E-05 | 7.46E-05 | 1.64753  |
| C22orf46 | -0.1302  | 0.913706 | 4.431266 | -4.42221 | 3.00E-05 | 7.47E-05 | 1.644964 |
| ZNF573   | 0.271772 | 1.20729  | 4.984177 | 4.421551 | 3.01E-05 | 7.49E-05 | 1.642621 |
| AQP3     | -0.43692 | 0.738708 | 9.286835 | -4.42016 | 3.02E-05 | 7.53E-05 | 1.637638 |
| CIDEC    | -0.22021 | 0.85844  | 5.336709 | -4.41977 | 3.03E-05 | 7.54E-05 | 1.636247 |
| RBPMS    | 0.23724  | 1.178735 | 7.756709 | 4.41748  | 3.05E-05 | 7.60E-05 | 1.628042 |
| SCN3A    | 0.221528 | 1.165968 | 4.159494 | 4.416789 | 3.06E-05 | 7.61E-05 | 1.625566 |
| GPR162   | -0.18758 | 0.878076 | 5.353165 | -4.41582 | 3.07E-05 | 7.64E-05 | 1.622115 |
| NAT8     | -0.49043 | 0.711811 | 12.67557 | -4.41445 | 3.09E-05 | 7.68E-05 | 1.61718  |
| ZWINT    | 0.382747 | 1.303822 | 6.635316 | 4.414244 | 3.09E-05 | 7.68E-05 | 1.616456 |
| FOS      | -1.30179 | 0.405622 | 7.030127 | -4.41423 | 3.09E-05 | 7.68E-05 | 1.61642  |
| UAP1     | -0.43569 | 0.739343 | 8.031266 | -4.4136  | 3.10E-05 | 7.69E-05 | 1.614157 |
| EFCC1    | -0.24298 | 0.845    | 5.196329 | -4.41359 | 3.10E-05 | 7.69E-05 | 1.614115 |
| AUP1     | -0.18273 | 0.881036 | 7.733671 | -4.41209 | 3.11E-05 | 7.73E-05 | 1.608764 |
| SERPINF1 | 0.832984 | 1.781366 | 7.408608 | 4.411097 | 3.13E-05 | 7.76E-05 | 1.605199 |
| TMEM134  | -0.18607 | 0.878999 | 6.893797 | -4.4109  | 3.13E-05 | 7.76E-05 | 1.604511 |
| SLC2A2   | -0.55937 | 0.6786   | 8.100253 | -4.40835 | 3.16E-05 | 7.83E-05 | 1.595359 |
| RNMTL1   | -0.15505 | 0.898104 | 7.120886 | -4.40834 | 3.16E-05 | 7.83E-05 | 1.595342 |
| CUL5     | -0.17298 | 0.887006 | 7.037089 | -4.40792 | 3.16E-05 | 7.84E-05 | 1.593848 |
| GTF2A2   | 0.195171 | 1.14486  | 8.086962 | 4.407879 | 3.16E-05 | 7.84E-05 | 1.593691 |
| PPEF1    | -0.25445 | 0.838309 | 4.130886 | -4.40705 | 3.17E-05 | 7.86E-05 | 1.59074  |
| KLHL2    | 0.197062 | 1.146361 | 7.831013 | 4.405505 | 3.19E-05 | 7.91E-05 | 1.585204 |
| SNRNP25  | -0.2154  | 0.86131  | 7.896329 | -4.40474 | 3.20E-05 | 7.93E-05 | 1.582462 |
| RRP1     | -0.16366 | 0.89276  | 6.216203 | -4.40457 | 3.20E-05 | 7.93E-05 | 1.58187  |
| RHBDF1   | 0.167872 | 1.1234   | 5.721646 | 4.403213 | 3.22E-05 | 7.97E-05 | 1.577013 |
| MTMR6    | 0.189592 | 1.140441 | 6.223544 | 4.40071  | 3.25E-05 | 8.04E-05 | 1.568071 |
| DRP2     | -0.17076 | 0.888372 | 5.00519  | -4.40064 | 3.25E-05 | 8.04E-05 | 1.567813 |
| DERL1    | 0.186094 | 1.137679 | 7.180127 | 4.399008 | 3.27E-05 | 8.09E-05 | 1.561991 |
| GNB1     | 0.149545 | 1.10922  | 9.147468 | 4.398871 | 3.27E-05 | 8.09E-05 | 1.561501 |
| NFYB     | 0.179025 | 1.132119 | 5.83     | 4.397085 | 3.29E-05 | 8.14E-05 | 1.555125 |
| CYBA     | 0.367813 | 1.290395 | 9.778861 | 4.396213 | 3.30E-05 | 8.16E-05 | 1.552012 |
| SNRPD2   | 0.242628 | 1.183146 | 10.55418 | 4.395408 | 3.31E-05 | 8.19E-05 | 1.549137 |
| EXPH5    | -0.25351 | 0.838852 | 5.70519  | -4.3953  | 3.31E-05 | 8.19E-05 | 1.548752 |
| MRPS12   | -0.14986 | 0.901337 | 5.635443 | -4.39475 | 3.32E-05 | 8.20E-05 | 1.546789 |
| SCD      | -0.24092 | 0.846204 | 7.112405 | -4.39461 | 3.32E-05 | 8.20E-05 | 1.546306 |
| SUGP1    | 0.204605 | 1.152371 | 6.291772 | 4.394094 | 3.33E-05 | 8.22E-05 | 1.544447 |
| ELP4     | -0.17798 | 0.883937 | 7.4      | -4.38992 | 3.38E-05 | 8.34E-05 | 1.529543 |
| HTATIP2  | 0.276423 | 1.211188 | 7.071772 | 4.389222 | 3.39E-05 | 8.36E-05 | 1.527067 |
| SOBP     | -0.26192 | 0.833975 | 6.414937 | -4.38873 | 3.40E-05 | 8.37E-05 | 1.52533  |

|          |          |          |          |          |          |          |          |
|----------|----------|----------|----------|----------|----------|----------|----------|
| RGS6     | -0.14057 | 0.907163 | 5.032152 | -4.38786 | 3.41E-05 | 8.40E-05 | 1.522196 |
| AGPS     | 0.294657 | 1.226594 | 6.887215 | 4.387404 | 3.41E-05 | 8.41E-05 | 1.520585 |
| CALR     | 0.188893 | 1.139889 | 6.914557 | 4.386295 | 3.43E-05 | 8.44E-05 | 1.516631 |
| MLYCD    | -0.21372 | 0.86231  | 7.780506 | -4.38584 | 3.43E-05 | 8.45E-05 | 1.51502  |
| ID1      | 0.619348 | 1.536181 | 8.229367 | 4.38513  | 3.44E-05 | 8.47E-05 | 1.51248  |
| RPS21    | 0.270909 | 1.206568 | 11.64316 | 4.381832 | 3.48E-05 | 8.58E-05 | 1.500727 |
| NINJ2    | 0.23056  | 1.17329  | 4.606962 | 4.380402 | 3.50E-05 | 8.62E-05 | 1.495633 |
| APOBEC3A | 0.328808 | 1.255975 | 3.882785 | 4.380184 | 3.51E-05 | 8.62E-05 | 1.494856 |
| RTN3     | 0.237194 | 1.178698 | 9.467342 | 4.379833 | 3.51E-05 | 8.63E-05 | 1.493608 |
| PRLH     | -0.27315 | 0.827511 | 5.463291 | -4.37929 | 3.52E-05 | 8.65E-05 | 1.491657 |
| MRPL16   | -0.21592 | 0.860996 | 8.647848 | -4.37683 | 3.55E-05 | 8.72E-05 | 1.482924 |
| PITPNC1  | -0.2091  | 0.865078 | 6.894177 | -4.37592 | 3.56E-05 | 8.75E-05 | 1.479657 |
| VWA7     | -0.2014  | 0.869704 | 5.83     | -4.37533 | 3.57E-05 | 8.77E-05 | 1.477584 |
| ATF3     | -1.11208 | 0.462626 | 6.436329 | -4.3746  | 3.58E-05 | 8.79E-05 | 1.474991 |
| ADRBK1   | 0.161627 | 1.118548 | 5.811646 | 4.372415 | 3.61E-05 | 8.86E-05 | 1.467202 |
| EHF      | 0.351469 | 1.275859 | 4.447468 | 4.371477 | 3.62E-05 | 8.89E-05 | 1.463865 |
| HPSE2    | -0.2164  | 0.860713 | 5.127215 | -4.36952 | 3.65E-05 | 8.95E-05 | 1.456913 |
| DYNLT3   | -0.22608 | 0.854955 | 10.52013 | -4.36872 | 3.66E-05 | 8.97E-05 | 1.454047 |
| PCSK5    | 0.197958 | 1.147074 | 4.35443  | 4.366819 | 3.68E-05 | 9.03E-05 | 1.4473   |
| SLC25A5  | -0.18049 | 0.882401 | 12.38873 | -4.36631 | 3.69E-05 | 9.05E-05 | 1.445475 |
| TM9SF1   | 0.211482 | 1.157877 | 7.935949 | 4.365593 | 3.70E-05 | 9.07E-05 | 1.442943 |
| KIF13B   | -0.22748 | 0.854123 | 7.663671 | -4.36418 | 3.72E-05 | 9.11E-05 | 1.437925 |
| ADH1B    | 0.942859 | 1.922334 | 8.003418 | 4.364085 | 3.72E-05 | 9.11E-05 | 1.437581 |
| CCT3     | 0.160474 | 1.117655 | 9.787468 | 4.361147 | 3.76E-05 | 9.21E-05 | 1.427145 |
| IGLV3-25 | 0.856976 | 1.811238 | 4.396456 | 4.359212 | 3.79E-05 | 9.27E-05 | 1.420272 |
| C19orf73 | -0.14158 | 0.906525 | 4.836076 | -4.35819 | 3.80E-05 | 9.31E-05 | 1.416635 |
| MAL      | 0.30664  | 1.236824 | 10.49418 | 4.356555 | 3.83E-05 | 9.36E-05 | 1.410837 |
| TRIP12   | 0.181733 | 1.134245 | 8.805696 | 4.356275 | 3.83E-05 | 9.37E-05 | 1.409843 |
| ZDHHC6   | -0.21484 | 0.861641 | 8.618734 | -4.35626 | 3.83E-05 | 9.37E-05 | 1.409796 |
| DHCR7    | -0.23027 | 0.852475 | 6.336203 | -4.35614 | 3.83E-05 | 9.37E-05 | 1.409355 |
| MED8     | -0.1329  | 0.911997 | 6.844051 | -4.35482 | 3.85E-05 | 9.41E-05 | 1.404694 |
| HTRA1    | -0.42244 | 0.74616  | 8.898101 | -4.35426 | 3.86E-05 | 9.43E-05 | 1.402682 |
| ZBTB22   | -0.18217 | 0.881374 | 6.286076 | -4.35211 | 3.89E-05 | 9.50E-05 | 1.395049 |
| GLTSCR2  | 0.225237 | 1.168969 | 11.4143  | 4.350473 | 3.91E-05 | 9.55E-05 | 1.389258 |
| NEMF     | 0.279137 | 1.213469 | 6.975949 | 4.34884  | 3.94E-05 | 9.61E-05 | 1.383466 |
| YWHAE    | -0.25428 | 0.838408 | 9.411392 | -4.34802 | 3.95E-05 | 9.64E-05 | 1.380558 |
| ATP6V1E1 | -0.16466 | 0.89214  | 10.66709 | -4.34471 | 4.00E-05 | 9.75E-05 | 1.368842 |
| GNB2L1   | 0.180929 | 1.133614 | 12.31101 | 4.343578 | 4.01E-05 | 9.79E-05 | 1.364813 |
| RPL14    | 0.183188 | 1.13539  | 11.96    | 4.341126 | 4.05E-05 | 9.88E-05 | 1.356129 |
| SGCA     | -0.1752  | 0.885642 | 4.218987 | -4.34016 | 4.07E-05 | 9.91E-05 | 1.352707 |
| ARC      | -0.23328 | 0.850698 | 4.53038  | -4.33975 | 4.07E-05 | 9.92E-05 | 1.351239 |
| LYRM9    | -0.21675 | 0.8605   | 6.239241 | -4.3396  | 4.07E-05 | 9.92E-05 | 1.35073  |
| THRB     | -0.21543 | 0.86129  | 6.493924 | -4.33859 | 4.09E-05 | 9.96E-05 | 1.347137 |

Table S1 Olive vs. Control

| Gene    | logFC    | UnlogFC  | AveExpr  | t        | P.Value  | adj.P.Val | B        |
|---------|----------|----------|----------|----------|----------|-----------|----------|
| DUSP1   | -1.73342 | 0.300739 | 7.536267 | -10.0838 | 9.26E-16 | 7.83E-12  | 25.41705 |
| CEBPB   | -1.15716 | 0.448395 | 8.368    | -9.62969 | 6.89E-15 | 2.15E-11  | 23.47789 |
| RHOB    | -1.0913  | 0.469337 | 9.329333 | -9.6068  | 7.62E-15 | 2.15E-11  | 23.37979 |
| ZFP36   | -1.28408 | 0.410633 | 8.336533 | -9.50602 | 1.19E-14 | 2.52E-11  | 22.94751 |
| TDP2    | 0.383703 | 1.304686 | 10.6088  | 9.314425 | 2.79E-14 | 4.72E-11  | 22.12436 |
| NFKBIA  | -0.92085 | 0.528199 | 9.4872   | -9.21982 | 4.25E-14 | 5.99E-11  | 21.71729 |
| FOSL2   | -0.51765 | 0.698507 | 5.672667 | -9.14681 | 5.88E-14 | 6.51E-11  | 21.40292 |
| SGK1    | -1.03516 | 0.48796  | 10.58387 | -9.13633 | 6.16E-14 | 6.51E-11  | 21.3578  |
| FILIP1L | -0.78501 | 0.580349 | 5.617333 | -8.89322 | 1.82E-13 | 1.71E-10  | 20.30971 |
| MTERF1  | 0.4906   | 1.405029 | 5.040133 | 8.866635 | 2.05E-13 | 1.73E-10  | 20.19502 |
| ZZZ3    | 0.524835 | 1.438769 | 7.127067 | 8.666232 | 5.00E-13 | 3.61E-10  | 19.33003 |
| CCDC51  | 0.447354 | 1.363537 | 8.234933 | 8.646126 | 5.47E-13 | 3.61E-10  | 19.24323 |
| ABCG1   | 0.742046 | 1.672547 | 5.944533 | 8.64266  | 5.56E-13 | 3.61E-10  | 19.22826 |
| RGS2    | -1.46122 | 0.363185 | 7.871733 | -8.6266  | 5.97E-13 | 3.61E-10  | 19.15891 |
| KLF6    | -1.37289 | 0.386118 | 8.178933 | -8.52847 | 9.25E-13 | 4.82E-10  | 18.73522 |
| MAFF    | -2.44483 | 0.183668 | 6.494667 | -8.50376 | 1.03E-12 | 4.82E-10  | 18.62853 |
| ZSCAN26 | 0.397001 | 1.316768 | 6.131333 | 8.502699 | 1.04E-12 | 4.82E-10  | 18.62394 |
| PDK4    | -1.76525 | 0.294176 | 7.696133 | -8.49614 | 1.07E-12 | 4.82E-10  | 18.59563 |
| ZBED8   | 0.531012 | 1.444942 | 4.562933 | 8.493184 | 1.08E-12 | 4.82E-10  | 18.58285 |
| ZFAND5  | -0.78275 | 0.581257 | 9.751467 | -8.46295 | 1.24E-12 | 5.24E-10  | 18.45231 |
| CITED2  | 0.785345 | 1.723504 | 7.218667 | 8.434438 | 1.41E-12 | 5.45E-10  | 18.32921 |
| SYNJ1   | 0.410802 | 1.329425 | 5.5308   | 8.432451 | 1.42E-12 | 5.45E-10  | 18.32063 |
| CDKN1A  | -0.88862 | 0.54013  | 8.1764   | -8.38359 | 1.76E-12 | 6.48E-10  | 18.10967 |
| PER1    | -0.60814 | 0.656042 | 7.4792   | -8.33809 | 2.16E-12 | 7.61E-10  | 17.91326 |
| USP8    | 0.335067 | 1.261436 | 7.301733 | 8.317989 | 2.36E-12 | 7.94E-10  | 17.8265  |
| MGAT2   | 0.339843 | 1.265618 | 6.384667 | 8.310749 | 2.44E-12 | 7.94E-10  | 17.79525 |
| CRNKL1  | 0.436027 | 1.352874 | 7.199467 | 8.2705   | 2.92E-12 | 9.02E-10  | 17.62154 |
| FBXO28  | 0.456619 | 1.372322 | 7.853733 | 8.265278 | 2.99E-12 | 9.02E-10  | 17.59901 |
| FOS     | -2.26564 | 0.207958 | 6.697867 | -8.22734 | 3.54E-12 | 1.03E-09  | 17.4353  |
| B4GALT4 | 0.364033 | 1.287019 | 6.812933 | 8.133298 | 5.38E-12 | 1.52E-09  | 17.02964 |
| CDC23   | 0.401634 | 1.321003 | 7.355733 | 8.113522 | 5.88E-12 | 1.57E-09  | 16.94437 |
| GOLPH3L | 0.342091 | 1.267593 | 8.744667 | 8.104148 | 6.13E-12 | 1.57E-09  | 16.90395 |
| EGR1    | -1.68223 | 0.3116   | 7.008667 | -8.10358 | 6.14E-12 | 1.57E-09  | 16.90151 |
| CNOT6   | 0.339348 | 1.265185 | 7.071867 | 8.096794 | 6.33E-12 | 1.57E-09  | 16.87224 |
| ZC3H7A  | 0.446312 | 1.362553 | 6.4104   | 8.075952 | 6.95E-12 | 1.65E-09  | 16.78239 |
| SPRY4   | -0.52864 | 0.693206 | 6.3532   | -8.07333 | 7.03E-12 | 1.65E-09  | 16.77111 |
| PPID    | 0.470022 | 1.385131 | 7.884133 | 8.038422 | 8.21E-12 | 1.88E-09  | 16.62063 |
| APOLD1  | -0.96534 | 0.512156 | 5.681733 | -7.99261 | 1.01E-11 | 2.24E-09  | 16.42323 |
| IER3    | -1.28487 | 0.410407 | 8.5284   | -7.95711 | 1.18E-11 | 2.48E-09  | 16.27034 |
| DUSP6   | -0.88558 | 0.541271 | 7.764533 | -7.95591 | 1.18E-11 | 2.48E-09  | 16.26519 |
| TOMM70A | 0.344475 | 1.269689 | 8.299067 | 7.952934 | 1.20E-11 | 2.48E-09  | 16.25236 |
| ARMC1   | 0.382474 | 1.303575 | 7.820933 | 7.886222 | 1.61E-11 | 3.25E-09  | 15.96517 |
| RTCA    | 0.447586 | 1.363757 | 9.293067 | 7.823605 | 2.13E-11 | 4.13E-09  | 15.6958  |
| KMO     | 0.562054 | 1.47637  | 9.559067 | 7.822111 | 2.15E-11 | 4.13E-09  | 15.68938 |
| CEBPD   | -0.8615  | 0.55038  | 10.0108  | -7.80242 | 2.34E-11 | 4.40E-09  | 15.60469 |



|         |          |          |          |          |          |          |          |
|---------|----------|----------|----------|----------|----------|----------|----------|
| NOL11   | 0.375712 | 1.29748  | 8.262667 | 7.780669 | 2.58E-11 | 4.74E-09 | 15.51121 |
| JUNB    | -1.15153 | 0.450148 | 6.432133 | -7.74963 | 2.96E-11 | 5.33E-09 | 15.37784 |
| GADD45B | -1.4271  | 0.371878 | 8.226667 | -7.74018 | 3.09E-11 | 5.44E-09 | 15.33722 |
| CISH    | -0.8913  | 0.539129 | 8.2308   | -7.69013 | 3.86E-11 | 6.65E-09 | 15.12231 |
| RGS3    | -0.58136 | 0.668335 | 6.3676   | -7.65644 | 4.48E-11 | 7.57E-09 | 14.97768 |
| ARMT1   | 0.579063 | 1.493879 | 8.5276   | 7.637015 | 4.88E-11 | 8.09E-09 | 14.89436 |
| MYLIP   | 0.525097 | 1.439031 | 7.241733 | 7.54733  | 7.26E-11 | 1.18E-08 | 14.50993 |
| PLCL2   | 0.528276 | 1.442205 | 7.364267 | 7.532895 | 7.74E-11 | 1.23E-08 | 14.44811 |
| AIF1    | -0.41814 | 0.748388 | 7.662667 | -7.49056 | 9.33E-11 | 1.46E-08 | 14.26688 |
| PRKACB  | 0.366754 | 1.289448 | 7.543333 | 7.486892 | 9.48E-11 | 1.46E-08 | 14.2512  |
| BHLHB9  | 0.497751 | 1.412011 | 5.573333 | 7.477307 | 9.89E-11 | 1.49E-08 | 14.21019 |
| ANGPTL3 | 0.804273 | 1.746265 | 8.875333 | 7.45947  | 1.07E-10 | 1.59E-08 | 14.1339  |
| CCT6A   | 0.364138 | 1.287112 | 7.9708   | 7.430684 | 1.22E-10 | 1.77E-08 | 14.01083 |
| ETS2    | -0.65055 | 0.637035 | 6.7828   | -7.40756 | 1.35E-10 | 1.93E-08 | 13.91202 |
| MTMR4   | 0.408201 | 1.32703  | 7.916533 | 7.377191 | 1.54E-10 | 2.17E-08 | 13.78231 |
| RASA1   | 0.28404  | 1.2176   | 7.296133 | 7.349151 | 1.74E-10 | 2.41E-08 | 13.66263 |
| ANK3    | 0.274775 | 1.209805 | 8.917333 | 7.336559 | 1.84E-10 | 2.51E-08 | 13.60891 |
| MTIF2   | 0.290517 | 1.223079 | 8.087333 | 7.324977 | 1.94E-10 | 2.60E-08 | 13.55951 |
| OARD1   | 0.4203   | 1.338206 | 8.227733 | 7.307481 | 2.09E-10 | 2.76E-08 | 13.4849  |
| POLR3B  | 0.355982 | 1.279856 | 7.293733 | 7.273405 | 2.43E-10 | 3.16E-08 | 13.33969 |
| DHX40   | 0.360682 | 1.284033 | 7.955333 | 7.265738 | 2.51E-10 | 3.22E-08 | 13.30703 |
| CTGF    | -1.12693 | 0.457888 | 8.6536   | -7.23744 | 2.85E-10 | 3.59E-08 | 13.18652 |
| JUND    | -0.5754  | 0.671098 | 6.049467 | -7.22707 | 2.98E-10 | 3.71E-08 | 13.14239 |
| DRAM1   | 0.385915 | 1.306688 | 8.428133 | 7.198059 | 3.39E-10 | 4.15E-08 | 13.019   |
| RCBTB1  | 0.621732 | 1.538721 | 6.444533 | 7.193375 | 3.46E-10 | 4.17E-08 | 12.99909 |
| CYR61   | -1.38416 | 0.383112 | 7.3124   | -7.18618 | 3.57E-10 | 4.22E-08 | 12.96852 |
| STX3    | 0.499385 | 1.413611 | 7.2844   | 7.184382 | 3.60E-10 | 4.22E-08 | 12.96085 |
| FAM134B | -0.58765 | 0.665428 | 9.389733 | -7.11138 | 4.95E-10 | 5.74E-08 | 12.65084 |
| ALDH8A1 | 0.375862 | 1.297615 | 10.56533 | 7.104775 | 5.10E-10 | 5.80E-08 | 12.6228  |
| TRMT1L  | 0.408051 | 1.326892 | 6.053867 | 7.102511 | 5.15E-10 | 5.80E-08 | 12.6132  |
| ZBED5   | 0.3847   | 1.305588 | 8.358533 | 7.098275 | 5.25E-10 | 5.84E-08 | 12.59523 |
| TMEM135 | 0.466207 | 1.381473 | 7.730267 | 7.079374 | 5.70E-10 | 6.26E-08 | 12.51509 |
| BBS10   | 0.486057 | 1.400612 | 5.895333 | 7.045026 | 6.62E-10 | 7.18E-08 | 12.36955 |
| NR4A1   | -1.12069 | 0.459874 | 6.266667 | -7.02655 | 7.18E-10 | 7.69E-08 | 12.29133 |
| TUBAL3  | 0.478298 | 1.3931   | 7.597333 | 7.012436 | 7.64E-10 | 8.07E-08 | 12.23159 |
| ABCA1   | 0.613171 | 1.529617 | 8.554267 | 6.984247 | 8.64E-10 | 9.02E-08 | 12.11237 |
| MOSPD1  | 0.290397 | 1.222977 | 7.0912   | 6.978916 | 8.84E-10 | 9.12E-08 | 12.08983 |
| NUP107  | 0.311132 | 1.240681 | 7.564    | 6.972686 | 9.09E-10 | 9.26E-08 | 12.0635  |
| CCNL1   | -0.49289 | 0.710598 | 7.485067 | -6.96485 | 9.41E-10 | 9.47E-08 | 12.0304  |
| ZNF268  | 0.419048 | 1.337045 | 6.167467 | 6.936414 | 1.06E-09 | 1.06E-07 | 11.91029 |
| RND3    | -0.74926 | 0.59491  | 7.4692   | -6.92875 | 1.10E-09 | 1.08E-07 | 11.87795 |
| C2orf42 | 0.33599  | 1.262243 | 6.620133 | 6.91362  | 1.18E-09 | 1.14E-07 | 11.8141  |
| GDF15   | -1.38082 | 0.383999 | 7.941733 | -6.90462 | 1.22E-09 | 1.16E-07 | 11.77613 |
| GLT8D1  | 0.235022 | 1.176925 | 7.728267 | 6.904176 | 1.23E-09 | 1.16E-07 | 11.77426 |
| FOSB    | -1.73757 | 0.299874 | 6.0764   | -6.87274 | 1.41E-09 | 1.32E-07 | 11.64175 |
| TSPYL2  | -0.44111 | 0.736568 | 6.868133 | -6.86112 | 1.48E-09 | 1.37E-07 | 11.59281 |
| RAB40B  | 0.378591 | 1.300071 | 8.589867 | 6.8541   | 1.52E-09 | 1.39E-07 | 11.56325 |

|          |          |          |          |          |          |          |          |
|----------|----------|----------|----------|----------|----------|----------|----------|
| MTTP     | 0.546987 | 1.461031 | 6.861067 | 6.853511 | 1.53E-09 | 1.39E-07 | 11.56077 |
| ASF1A    | 0.378058 | 1.299592 | 6.8964   | 6.84382  | 1.59E-09 | 1.43E-07 | 11.51997 |
| FAM98A   | 0.358868 | 1.282419 | 8.565067 | 6.806242 | 1.88E-09 | 1.67E-07 | 11.3619  |
| ZNF302   | 0.415735 | 1.333978 | 5.880533 | 6.796281 | 1.96E-09 | 1.73E-07 | 11.32003 |
| METTL9   | 0.206567 | 1.153939 | 10.38813 | 6.793351 | 1.99E-09 | 1.73E-07 | 11.30772 |
| LIPG     | -0.78535 | 0.58021  | 5.2672   | -6.78832 | 2.03E-09 | 1.75E-07 | 11.28658 |
| PIK3R3   | 0.291079 | 1.223555 | 5.627333 | 6.778257 | 2.12E-09 | 1.81E-07 | 11.24431 |
| NUP37    | 0.313583 | 1.242791 | 7.5856   | 6.771382 | 2.18E-09 | 1.85E-07 | 11.21545 |
| CSTF2T   | 0.284198 | 1.217733 | 6.482933 | 6.7691   | 2.21E-09 | 1.85E-07 | 11.20586 |
| PPP1R15A | -0.49681 | 0.708674 | 5.917467 | -6.727   | 2.65E-09 | 2.18E-07 | 11.02925 |
| COMMD8   | 0.314423 | 1.243514 | 9.698533 | 6.726027 | 2.66E-09 | 2.18E-07 | 11.02517 |
| ATF7IP   | 0.339393 | 1.265224 | 7.066667 | 6.702292 | 2.95E-09 | 2.40E-07 | 10.92572 |
| JUN      | -1.28773 | 0.409595 | 6.6136   | -6.69869 | 2.99E-09 | 2.41E-07 | 10.91064 |
| EXOC1    | 0.352766 | 1.277007 | 8.040533 | 6.694232 | 3.05E-09 | 2.43E-07 | 10.89196 |
| PHKB     | 0.329145 | 1.256269 | 7.7664   | 6.67218  | 3.36E-09 | 2.65E-07 | 10.79967 |
| DNAJC13  | 0.259153 | 1.196776 | 6.023467 | 6.62411  | 4.13E-09 | 3.24E-07 | 10.59875 |
| PPCS     | 0.224783 | 1.168601 | 9.552133 | 6.608056 | 4.43E-09 | 3.43E-07 | 10.53174 |
| TERF1    | 0.247594 | 1.187225 | 7.659867 | 6.606066 | 4.47E-09 | 3.43E-07 | 10.52343 |
| RAB29    | 0.396874 | 1.316652 | 8.481067 | 6.585288 | 4.89E-09 | 3.72E-07 | 10.43676 |
| SUOX     | 0.278171 | 1.212656 | 8.899733 | 6.582209 | 4.95E-09 | 3.74E-07 | 10.42393 |
| BAIAP2   | -0.41103 | 0.752084 | 5.861067 | -6.56808 | 5.27E-09 | 3.94E-07 | 10.36506 |
| FPGT     | 0.367429 | 1.290052 | 5.945333 | 6.542059 | 5.89E-09 | 4.37E-07 | 10.25668 |
| PTGDS    | -0.97798 | 0.507691 | 7.947067 | -6.53067 | 6.19E-09 | 4.55E-07 | 10.20929 |
| VPS45    | 0.268598 | 1.204637 | 7.381467 | 6.522995 | 6.39E-09 | 4.64E-07 | 10.17737 |
| DCP2     | 0.320615 | 1.248863 | 6.202667 | 6.521896 | 6.42E-09 | 4.64E-07 | 10.1728  |
| KRIT1    | 0.291919 | 1.224268 | 5.420267 | 6.514565 | 6.63E-09 | 4.75E-07 | 10.14232 |
| TNS2     | -0.36036 | 0.77897  | 6.5924   | -6.5033  | 6.96E-09 | 4.94E-07 | 10.09552 |
| CHI3L1   | -1.01484 | 0.494882 | 5.769333 | -6.50157 | 7.01E-09 | 4.94E-07 | 10.08832 |
| MCL1     | -0.49469 | 0.709717 | 7.8172   | -6.49907 | 7.09E-09 | 4.95E-07 | 10.07793 |
| RCBTB2   | 0.287811 | 1.220787 | 8.1452   | 6.49476  | 7.22E-09 | 5.00E-07 | 10.06002 |
| FAM69A   | 0.483906 | 1.398525 | 7.129067 | 6.487514 | 7.45E-09 | 5.12E-07 | 10.02992 |
| RARS     | 0.321207 | 1.249375 | 8.7792   | 6.469711 | 8.04E-09 | 5.48E-07 | 9.956027 |
| NR4A3    | -0.60214 | 0.658774 | 4.575867 | -6.46395 | 8.24E-09 | 5.57E-07 | 9.932111 |
| GPATCH1  | 0.274858 | 1.209875 | 5.5228   | 6.462096 | 8.31E-09 | 5.57E-07 | 9.924436 |
| ATF3     | -1.71259 | 0.305111 | 6.238667 | -6.45483 | 8.57E-09 | 5.71E-07 | 9.894298 |
| TSC22D3  | -0.93804 | 0.521943 | 8.859467 | -6.42049 | 9.93E-09 | 6.54E-07 | 9.752022 |
| FNTA     | 0.252211 | 1.191031 | 8.066    | 6.419318 | 9.98E-09 | 6.54E-07 | 9.747166 |
| KIAA0391 | 0.227309 | 1.170649 | 8.375067 | 6.400797 | 1.08E-08 | 7.03E-07 | 9.670518 |
| NROB2    | -0.50346 | 0.705415 | 6.5412   | -6.38038 | 1.18E-08 | 7.57E-07 | 9.586116 |
| LDLR     | -0.65249 | 0.636182 | 5.2564   | -6.37994 | 1.18E-08 | 7.57E-07 | 9.584292 |
| BTG2     | -0.84591 | 0.556358 | 7.144    | -6.36792 | 1.24E-08 | 7.91E-07 | 9.53461  |
| BET1     | 0.278951 | 1.213312 | 7.9496   | 6.353078 | 1.33E-08 | 8.36E-07 | 9.473341 |
| FASTKD3  | 0.431957 | 1.349062 | 7.625067 | 6.34523  | 1.37E-08 | 8.58E-07 | 9.440957 |
| STX7     | 0.276499 | 1.211252 | 8.958    | 6.337978 | 1.41E-08 | 8.79E-07 | 9.411039 |
| RBM47    | 0.281094 | 1.215116 | 9.771733 | 6.327599 | 1.48E-08 | 9.12E-07 | 9.368241 |
| RWDD3    | 0.378823 | 1.300281 | 6.218    | 6.312195 | 1.58E-08 | 9.63E-07 | 9.304765 |
| TAOK3    | 0.298576 | 1.22993  | 7.190667 | 6.31137  | 1.58E-08 | 9.63E-07 | 9.301366 |

|          |          |          |          |          |          |          |          |
|----------|----------|----------|----------|----------|----------|----------|----------|
| SEPHS2   | 0.261222 | 1.198493 | 10.58427 | 6.307814 | 1.61E-08 | 9.71E-07 | 9.286717 |
| DENR     | 0.286147 | 1.219379 | 8.6376   | 6.302435 | 1.65E-08 | 9.85E-07 | 9.264568 |
| CCNG2    | 0.357774 | 1.281447 | 8.3216   | 6.301106 | 1.65E-08 | 9.85E-07 | 9.259096 |
| STEAP1   | 0.518853 | 1.432816 | 6.908667 | 6.287775 | 1.75E-08 | 1.04E-06 | 9.204228 |
| TRIP4    | 0.31593  | 1.244813 | 8.319333 | 6.276594 | 1.84E-08 | 1.08E-06 | 9.158233 |
| SDPR     | -0.42372 | 0.745501 | 5.317467 | -6.27052 | 1.89E-08 | 1.09E-06 | 9.13325  |
| FAM179B  | 0.35994  | 1.283373 | 7.166133 | 6.270195 | 1.89E-08 | 1.09E-06 | 9.131925 |
| MINPP1   | 0.385862 | 1.30664  | 7.7592   | 6.266021 | 1.92E-08 | 1.11E-06 | 9.114766 |
| NEDD9    | -0.54104 | 0.687274 | 7.446667 | -6.2643  | 1.94E-08 | 1.11E-06 | 9.107679 |
| NR3C1    | 0.306004 | 1.236279 | 7.4768   | 6.261997 | 1.96E-08 | 1.11E-06 | 9.098228 |
| NUDT9    | 0.258793 | 1.196477 | 8.315067 | 6.257761 | 1.99E-08 | 1.12E-06 | 9.080825 |
| NOC3L    | 0.332339 | 1.259053 | 6.6172   | 6.247308 | 2.08E-08 | 1.17E-06 | 9.037889 |
| RAB20    | -0.59565 | 0.661745 | 8.795333 | -6.23886 | 2.16E-08 | 1.20E-06 | 9.003223 |
| LAMTOR3  | 0.28063  | 1.214725 | 8.435467 | 6.23586  | 2.19E-08 | 1.21E-06 | 8.990895 |
| CTCF     | 0.232684 | 1.175019 | 7.628667 | 6.230252 | 2.24E-08 | 1.23E-06 | 8.967881 |
| CHSY1    | -0.47702 | 0.718458 | 6.835333 | -6.22359 | 2.30E-08 | 1.26E-06 | 8.940548 |
| CDK7     | 0.375262 | 1.297075 | 7.584667 | 6.211235 | 2.43E-08 | 1.31E-06 | 8.889897 |
| NAT1     | 0.380682 | 1.301957 | 7.843067 | 6.209225 | 2.45E-08 | 1.32E-06 | 8.881659 |
| TYRO3    | -0.30968 | 0.806822 | 5.777867 | -6.20665 | 2.47E-08 | 1.32E-06 | 8.871092 |
| ZBTB11   | 0.367361 | 1.289991 | 6.788133 | 6.19697  | 2.58E-08 | 1.37E-06 | 8.831451 |
| MGEA5    | 0.344393 | 1.269617 | 8.1336   | 6.191873 | 2.63E-08 | 1.39E-06 | 8.810579 |
| SLCO4A1  | -1.00253 | 0.499123 | 6.706267 | -6.18024 | 2.77E-08 | 1.45E-06 | 8.762949 |
| VAV3     | 0.415885 | 1.334116 | 8.6032   | 6.178868 | 2.78E-08 | 1.45E-06 | 8.757345 |
| KANSL1L  | 0.300517 | 1.231586 | 5.9212   | 6.173973 | 2.84E-08 | 1.47E-06 | 8.737316 |
| TBL1XR1  | 0.378966 | 1.300409 | 6.616533 | 6.16774  | 2.92E-08 | 1.49E-06 | 8.711824 |
| HBEGF    | -0.69636 | 0.617129 | 5.708133 | -6.16692 | 2.93E-08 | 1.49E-06 | 8.708479 |
| CDK8     | 0.25521  | 1.193509 | 5.429333 | 6.166478 | 2.93E-08 | 1.49E-06 | 8.706665 |
| RGS16    | -0.23771 | 0.848088 | 5.177867 | -6.16097 | 3.00E-08 | 1.52E-06 | 8.684159 |
| DAB2     | 0.23931  | 1.180428 | 10.83253 | 6.15664  | 3.06E-08 | 1.54E-06 | 8.666444 |
| SLC35A5  | 0.29967  | 1.230863 | 7.134133 | 6.152741 | 3.11E-08 | 1.56E-06 | 8.650508 |
| TFEC     | 0.478388 | 1.393186 | 7.646933 | 6.128928 | 3.44E-08 | 1.71E-06 | 8.553268 |
| TMEM251  | 0.340315 | 1.266033 | 7.685067 | 6.128176 | 3.45E-08 | 1.71E-06 | 8.550198 |
| RIOK3    | 0.193718 | 1.143708 | 7.5836   | 6.122689 | 3.53E-08 | 1.73E-06 | 8.52781  |
| ZNF112   | 0.293651 | 1.225738 | 4.875067 | 6.122491 | 3.53E-08 | 1.73E-06 | 8.527    |
| HES1     | -0.56868 | 0.674233 | 7.147067 | -6.09663 | 3.94E-08 | 1.92E-06 | 8.421561 |
| GNPDA1   | 0.378441 | 1.299936 | 9.4272   | 6.089625 | 4.06E-08 | 1.96E-06 | 8.393045 |
| GEM      | -0.97451 | 0.508914 | 6.4408   | -6.07298 | 4.36E-08 | 2.09E-06 | 8.325311 |
| NAA35    | 0.237159 | 1.178669 | 5.766267 | 6.071695 | 4.38E-08 | 2.09E-06 | 8.320065 |
| DHX29    | 0.435862 | 1.352719 | 7.828533 | 6.063531 | 4.53E-08 | 2.15E-06 | 8.28686  |
| NPL      | 0.466934 | 1.382169 | 9.3012   | 6.051487 | 4.77E-08 | 2.25E-06 | 8.237903 |
| YARS2    | 0.224483 | 1.168358 | 6.8268   | 6.047154 | 4.86E-08 | 2.28E-06 | 8.220295 |
| UBXN8    | 0.248418 | 1.187904 | 7.204533 | 6.046514 | 4.87E-08 | 2.28E-06 | 8.217694 |
| KIAA0430 | 0.307309 | 1.237397 | 6.776    | 6.029468 | 5.23E-08 | 2.43E-06 | 8.148484 |
| DMXL1    | 0.535585 | 1.44953  | 8.624267 | 6.025803 | 5.32E-08 | 2.46E-06 | 8.133611 |
| IER2     | -0.71142 | 0.610717 | 9.460133 | -6.01429 | 5.58E-08 | 2.56E-06 | 8.0869   |
| ZNF638   | 0.30096  | 1.231964 | 8.025067 | 6.013291 | 5.60E-08 | 2.56E-06 | 8.082858 |
| IFIH1    | 0.697024 | 1.621157 | 5.819733 | 6.007975 | 5.73E-08 | 2.60E-06 | 8.06131  |

|          |          |          |          |          |          |          |          |
|----------|----------|----------|----------|----------|----------|----------|----------|
| NUP54    | 0.24413  | 1.184379 | 7.220267 | 6.006858 | 5.76E-08 | 2.60E-06 | 8.05678  |
| FMR1     | 0.283478 | 1.217126 | 9.116133 | 5.959308 | 7.03E-08 | 3.15E-06 | 7.864323 |
| LPCAT3   | 0.323576 | 1.251428 | 6.765333 | 5.957981 | 7.07E-08 | 3.15E-06 | 7.858959 |
| COPB2    | 0.184888 | 1.136728 | 9.324533 | 5.957721 | 7.08E-08 | 3.15E-06 | 7.857909 |
| TIPARP   | -0.89047 | 0.539438 | 8.655467 | -5.94987 | 7.31E-08 | 3.24E-06 | 7.826175 |
| ACVR1    | 0.343411 | 1.268753 | 8.372133 | 5.941959 | 7.56E-08 | 3.33E-06 | 7.794239 |
| SOCS2    | -0.77295 | 0.585218 | 6.783733 | -5.93857 | 7.67E-08 | 3.36E-06 | 7.780551 |
| NFASC    | -0.38217 | 0.767281 | 5.0544   | -5.93666 | 7.73E-08 | 3.37E-06 | 7.772836 |
| DUSP5    | -0.70953 | 0.61152  | 5.215867 | -5.93452 | 7.80E-08 | 3.38E-06 | 7.764194 |
| UNC119B  | 0.207661 | 1.154815 | 9.2416   | 5.932121 | 7.88E-08 | 3.40E-06 | 7.754533 |
| GMFB     | 0.297721 | 1.229201 | 8.099467 | 5.926513 | 8.06E-08 | 3.46E-06 | 7.731906 |
| FYCO1    | 0.278036 | 1.212543 | 6.525333 | 5.924539 | 8.13E-08 | 3.47E-06 | 7.723945 |
| SKAP2    | 0.242961 | 1.183419 | 7.235467 | 5.919665 | 8.30E-08 | 3.53E-06 | 7.704288 |
| WDFY3    | 0.266469 | 1.20286  | 7.3676   | 5.903578 | 8.88E-08 | 3.75E-06 | 7.639458 |
| NAT8B    | 0.717496 | 1.644326 | 8.797867 | 5.866231 | 1.04E-07 | 4.36E-06 | 7.489195 |
| NLGN1    | 0.354048 | 1.278142 | 5.167333 | 5.855222 | 1.09E-07 | 4.53E-06 | 7.44497  |
| ZNF33B   | 0.30003  | 1.23117  | 6.082533 | 5.854681 | 1.09E-07 | 4.53E-06 | 7.442797 |
| PDSS2    | 0.316784 | 1.245551 | 8.360533 | 5.842651 | 1.14E-07 | 4.74E-06 | 7.394507 |
| EIF2B1   | 0.172016 | 1.126632 | 8.1376   | 5.836776 | 1.17E-07 | 4.84E-06 | 7.370935 |
| SLC25A38 | 0.20422  | 1.152064 | 7.9844   | 5.830991 | 1.20E-07 | 4.93E-06 | 7.347735 |
| GPRC5A   | -0.34169 | 0.789118 | 6.288533 | -5.81862 | 1.27E-07 | 5.17E-06 | 7.298141 |
| COX15    | 0.236852 | 1.178418 | 7.1568   | 5.808282 | 1.32E-07 | 5.37E-06 | 7.256748 |
| CKAP2    | 0.272871 | 1.20821  | 4.567467 | 5.807069 | 1.33E-07 | 5.37E-06 | 7.251892 |
| AP3M2    | 0.264265 | 1.201024 | 7.0224   | 5.797478 | 1.38E-07 | 5.56E-06 | 7.213505 |
| NARS     | 0.176612 | 1.130226 | 11.10133 | 5.78045  | 1.48E-07 | 5.94E-06 | 7.145416 |
| STAMBP   | 0.207114 | 1.154377 | 7.709867 | 5.770322 | 1.55E-07 | 6.17E-06 | 7.104954 |
| SPOCK2   | -0.36736 | 0.775199 | 6.741867 | -5.76218 | 1.60E-07 | 6.30E-06 | 7.072443 |
| WDR12    | 0.296649 | 1.228288 | 8.7084   | 5.761838 | 1.60E-07 | 6.30E-06 | 7.071083 |
| THAP10   | 0.261882 | 1.199041 | 6.748    | 5.761748 | 1.60E-07 | 6.30E-06 | 7.070724 |
| FGFR1OP  | 0.306754 | 1.236922 | 6.760133 | 5.756924 | 1.63E-07 | 6.40E-06 | 7.051473 |
| ADD3     | 0.292579 | 1.224828 | 10.344   | 5.753826 | 1.66E-07 | 6.42E-06 | 7.039111 |
| JADE1    | -0.38162 | 0.767576 | 8.270267 | -5.7538  | 1.66E-07 | 6.42E-06 | 7.039014 |
| LIAS     | 0.431019 | 1.348186 | 6.3884   | 5.750015 | 1.68E-07 | 6.49E-06 | 7.023911 |
| DPP6     | -0.56463 | 0.676131 | 5.5832   | -5.7365  | 1.78E-07 | 6.84E-06 | 6.97005  |
| POT1     | 0.231694 | 1.174213 | 6.363067 | 5.72598  | 1.86E-07 | 7.11E-06 | 6.928131 |
| AVPI1    | -0.38606 | 0.765214 | 7.1492   | -5.72381 | 1.88E-07 | 7.14E-06 | 6.919478 |
| ZNF573   | 0.300382 | 1.231471 | 4.9868   | 5.715704 | 1.94E-07 | 7.35E-06 | 6.887228 |
| PCTP     | 0.381972 | 1.303121 | 8.554    | 5.705021 | 2.03E-07 | 7.65E-06 | 6.844738 |
| RFC4     | 0.28404  | 1.2176   | 6.566133 | 5.701412 | 2.06E-07 | 7.71E-06 | 6.830389 |
| ATF1     | 0.272256 | 1.207695 | 6.788533 | 5.701085 | 2.06E-07 | 7.71E-06 | 6.829089 |
| RNF14    | 0.270742 | 1.206428 | 7.4236   | 5.696041 | 2.10E-07 | 7.83E-06 | 6.809044 |
| RAB22A   | 0.201484 | 1.149881 | 7.545733 | 5.694063 | 2.12E-07 | 7.86E-06 | 6.801185 |
| MYO1C    | -0.21195 | 0.86337  | 7.724133 | -5.69087 | 2.15E-07 | 7.93E-06 | 6.788483 |
| DTX4     | 0.427811 | 1.345191 | 8.059333 | 5.6853   | 2.20E-07 | 8.08E-06 | 6.766379 |
| PRPF18   | 0.277931 | 1.212455 | 7.207467 | 5.682194 | 2.23E-07 | 8.15E-06 | 6.754049 |
| MFAP1    | 0.232654 | 1.174994 | 8.262133 | 5.676847 | 2.28E-07 | 8.27E-06 | 6.732826 |
| RNF146   | 0.277369 | 1.211982 | 7.067467 | 5.676419 | 2.28E-07 | 8.27E-06 | 6.731128 |

|          |          |          |          |          |          |          |          |
|----------|----------|----------|----------|----------|----------|----------|----------|
| MSH3     | 0.336867 | 1.26301  | 6.413733 | 5.672743 | 2.32E-07 | 8.37E-06 | 6.716545 |
| MAP7     | 0.297436 | 1.228959 | 8.2824   | 5.668534 | 2.36E-07 | 8.47E-06 | 6.69985  |
| MYO6     | 0.250397 | 1.189535 | 8.275733 | 5.667531 | 2.37E-07 | 8.47E-06 | 6.695872 |
| MKL2     | 0.289078 | 1.221859 | 7.363733 | 5.664868 | 2.39E-07 | 8.53E-06 | 6.685312 |
| ALS2CL   | -0.29723 | 0.813815 | 6.793333 | -5.66027 | 2.44E-07 | 8.66E-06 | 6.667102 |
| OSGEPL1  | 0.27533  | 1.210271 | 6.8232   | 5.653726 | 2.50E-07 | 8.86E-06 | 6.641154 |
| NDNF     | -1.12597 | 0.458195 | 6.6568   | -5.63619 | 2.69E-07 | 9.48E-06 | 6.571711 |
| PEX3     | 0.269378 | 1.205288 | 8.341333 | 5.628601 | 2.78E-07 | 9.74E-06 | 6.541705 |
| SMIM10L1 | 0.26946  | 1.205357 | 7.6368   | 5.627319 | 2.79E-07 | 9.75E-06 | 6.536637 |
| STAM     | 0.290997 | 1.223485 | 7.231867 | 5.624887 | 2.82E-07 | 9.81E-06 | 6.52702  |
| VPS4B    | 0.272736 | 1.208097 | 7.703067 | 5.621082 | 2.86E-07 | 9.90E-06 | 6.511977 |
| PPP2R3C  | 0.365817 | 1.288611 | 6.846667 | 5.620757 | 2.87E-07 | 9.90E-06 | 6.510694 |
| MAP3K4   | 0.259048 | 1.196689 | 7.4656   | 5.617315 | 2.91E-07 | 9.98E-06 | 6.497092 |
| MED8     | 0.168366 | 1.123785 | 6.964667 | 5.615782 | 2.93E-07 | 9.98E-06 | 6.491036 |
| NOL8     | 0.274865 | 1.209881 | 6.786933 | 5.615666 | 2.93E-07 | 9.98E-06 | 6.490576 |
| SHTN1    | 0.390832 | 1.311149 | 6.9296   | 5.608119 | 3.02E-07 | 1.03E-05 | 6.460766 |
| HARS2    | 0.223808 | 1.167812 | 7.4048   | 5.606854 | 3.04E-07 | 1.03E-05 | 6.455773 |
| RBM22    | 0.187579 | 1.138851 | 7.2984   | 5.604573 | 3.07E-07 | 1.03E-05 | 6.446766 |
| NSL1     | 0.237541 | 1.178982 | 7.027067 | 5.603724 | 3.08E-07 | 1.03E-05 | 6.443416 |
| VAMP2    | -0.19828 | 0.871592 | 6.243333 | -5.59781 | 3.15E-07 | 1.05E-05 | 6.420084 |
| PIM1     | -0.33652 | 0.791948 | 6.4964   | -5.59141 | 3.24E-07 | 1.08E-05 | 6.394836 |
| ECD      | 0.187076 | 1.138454 | 7.391467 | 5.59015  | 3.25E-07 | 1.08E-05 | 6.389858 |
| HTR1E    | -0.21795 | 0.859784 | 4.463333 | -5.58268 | 3.35E-07 | 1.11E-05 | 6.360427 |
| MFSD1    | 0.205    | 1.152686 | 9.484267 | 5.578909 | 3.41E-07 | 1.12E-05 | 6.34555  |
| GRAMD1C  | 0.421792 | 1.33959  | 7.260267 | 5.572552 | 3.50E-07 | 1.15E-05 | 6.320507 |
| SORBS2   | 0.328253 | 1.255492 | 7.634533 | 5.570112 | 3.53E-07 | 1.15E-05 | 6.310899 |
| NAT8     | 0.379565 | 1.30095  | 13.0272  | 5.568982 | 3.55E-07 | 1.15E-05 | 6.306448 |
| BTG3     | -0.51594 | 0.699335 | 7.615067 | -5.56364 | 3.63E-07 | 1.17E-05 | 6.285424 |
| ITPKC    | -0.27616 | 0.825785 | 6.178    | -5.55976 | 3.68E-07 | 1.19E-05 | 6.270135 |
| STK38    | 0.319483 | 1.247883 | 7.088533 | 5.55744  | 3.72E-07 | 1.19E-05 | 6.261025 |
| SPSB1    | -0.47908 | 0.717436 | 5.3228   | -5.55726 | 3.72E-07 | 1.19E-05 | 6.260298 |
| FLRT3    | 0.618096 | 1.534848 | 8.269867 | 5.556325 | 3.74E-07 | 1.19E-05 | 6.256638 |
| POP5     | 0.255352 | 1.193627 | 8.937867 | 5.556125 | 3.74E-07 | 1.19E-05 | 6.255853 |
| CPPED1   | 0.201694 | 1.150048 | 5.901467 | 5.551257 | 3.81E-07 | 1.21E-05 | 6.236707 |
| YTHDF3   | 0.30482  | 1.235265 | 7.873733 | 5.550291 | 3.83E-07 | 1.21E-05 | 6.232907 |
| GTF3C3   | 0.226199 | 1.169749 | 6.443333 | 5.548309 | 3.86E-07 | 1.21E-05 | 6.225117 |
| NXT1     | -0.30599 | 0.808887 | 7.301467 | -5.54441 | 3.92E-07 | 1.23E-05 | 6.209806 |
| KPNA4    | 0.24006  | 1.181042 | 6.015867 | 5.542735 | 3.95E-07 | 1.23E-05 | 6.203207 |
| PDHX     | 0.28928  | 1.222031 | 7.805333 | 5.541468 | 3.97E-07 | 1.23E-05 | 6.198229 |
| PROS1    | 0.314033 | 1.243178 | 7.5236   | 5.537109 | 4.04E-07 | 1.25E-05 | 6.181105 |
| SLC25A13 | 0.327541 | 1.254873 | 7.511867 | 5.534748 | 4.08E-07 | 1.26E-05 | 6.171832 |
| COL4A3   | -0.31754 | 0.802436 | 5.112    | -5.53408 | 4.09E-07 | 1.26E-05 | 6.169209 |
| BBIP1    | 0.198996 | 1.147899 | 7.893467 | 5.532565 | 4.12E-07 | 1.26E-05 | 6.16326  |
| MTUS1    | 0.231927 | 1.174402 | 7.2212   | 5.531946 | 4.13E-07 | 1.26E-05 | 6.160831 |
| CAND1    | 0.244655 | 1.18481  | 7.3396   | 5.528317 | 4.19E-07 | 1.27E-05 | 6.146582 |
| FANCF    | 0.250622 | 1.18972  | 6.419733 | 5.525447 | 4.24E-07 | 1.28E-05 | 6.135318 |
| CFDP1    | 0.291964 | 1.224306 | 9.795067 | 5.522329 | 4.29E-07 | 1.29E-05 | 6.123084 |

|          |          |          |          |          |          |          |          |
|----------|----------|----------|----------|----------|----------|----------|----------|
| ATG14    | 0.259108 | 1.196739 | 6.768667 | 5.521357 | 4.31E-07 | 1.29E-05 | 6.119272 |
| GADD45A  | -0.56466 | 0.676117 | 10.62667 | -5.52107 | 4.31E-07 | 1.29E-05 | 6.118151 |
| ZC3H15   | 0.233778 | 1.17591  | 8.752133 | 5.514671 | 4.43E-07 | 1.32E-05 | 6.093047 |
| TLR3     | 0.36937  | 1.291789 | 6.185867 | 5.514397 | 4.43E-07 | 1.32E-05 | 6.091975 |
| AMOT     | 0.322001 | 1.250064 | 10.07733 | 5.513903 | 4.44E-07 | 1.32E-05 | 6.090037 |
| ZNF271P  | 0.282249 | 1.216089 | 6.098267 | 5.510741 | 4.50E-07 | 1.33E-05 | 6.07764  |
| ZNF331   | -0.61618 | 0.652397 | 6.778267 | -5.50893 | 4.53E-07 | 1.33E-05 | 6.070556 |
| SNX2     | 0.226439 | 1.169944 | 8.6656   | 5.507964 | 4.55E-07 | 1.33E-05 | 6.066757 |
| GTF2H1   | 0.288148 | 1.221072 | 7.0412   | 5.507528 | 4.56E-07 | 1.33E-05 | 6.065045 |
| AKAP9    | 0.281664 | 1.215596 | 7.745867 | 5.505102 | 4.61E-07 | 1.34E-05 | 6.055541 |
| ANKRD17  | 0.218711 | 1.163693 | 7.474133 | 5.504165 | 4.62E-07 | 1.34E-05 | 6.051869 |
| SYNPO    | -0.3295  | 0.795813 | 6.429333 | -5.50256 | 4.65E-07 | 1.34E-05 | 6.045564 |
| SAP18    | 0.171079 | 1.125901 | 9.010933 | 5.502428 | 4.66E-07 | 1.34E-05 | 6.045064 |
| ANGEL2   | 0.272699 | 1.208065 | 6.1024   | 5.501863 | 4.67E-07 | 1.34E-05 | 6.042852 |
| CDC123   | 0.213066 | 1.159149 | 8.551733 | 5.501791 | 4.67E-07 | 1.34E-05 | 6.04257  |
| SCAF8    | 0.242556 | 1.183087 | 7.632267 | 5.500246 | 4.70E-07 | 1.34E-05 | 6.036517 |
| TNFAIP3  | -0.41765 | 0.748645 | 6.355467 | -5.49746 | 4.75E-07 | 1.35E-05 | 6.025587 |
| IARS2    | 0.253703 | 1.192264 | 9.398533 | 5.497261 | 4.76E-07 | 1.35E-05 | 6.024826 |
| CD58     | 0.298921 | 1.230224 | 7.0408   | 5.494245 | 4.81E-07 | 1.36E-05 | 6.013018 |
| SACM1L   | 0.238516 | 1.179778 | 9.0544   | 5.494171 | 4.82E-07 | 1.36E-05 | 6.012728 |
| PPWD1    | 0.259805 | 1.197317 | 5.633067 | 5.492194 | 4.85E-07 | 1.36E-05 | 6.004989 |
| NBR1     | 0.262354 | 1.199434 | 8.7384   | 5.489684 | 4.90E-07 | 1.37E-05 | 5.995165 |
| PSPH     | 0.408351 | 1.327168 | 5.5092   | 5.488046 | 4.94E-07 | 1.38E-05 | 5.988756 |
| CXCL2    | -1.07333 | 0.475221 | 4.971067 | -5.48102 | 5.08E-07 | 1.41E-05 | 5.961253 |
| DBR1     | 0.295735 | 1.22751  | 5.034133 | 5.479226 | 5.12E-07 | 1.42E-05 | 5.954254 |
| AIFM1    | 0.274543 | 1.209611 | 10.0392  | 5.478749 | 5.13E-07 | 1.42E-05 | 5.952388 |
| TACC1    | -0.40606 | 0.754679 | 8.381467 | -5.47444 | 5.22E-07 | 1.44E-05 | 5.935537 |
| PCOLCE2  | -0.98325 | 0.505838 | 5.7172   | -5.46929 | 5.33E-07 | 1.46E-05 | 5.915414 |
| CASP6    | 0.245802 | 1.185752 | 6.792    | 5.461715 | 5.50E-07 | 1.50E-05 | 5.885827 |
| KLK7     | -0.42133 | 0.746738 | 5.526    | -5.46036 | 5.53E-07 | 1.50E-05 | 5.880539 |
| LRRC40   | 0.311912 | 1.241351 | 7.713867 | 5.459937 | 5.54E-07 | 1.50E-05 | 5.878883 |
| TACSTD2  | -0.54406 | 0.685837 | 9.290933 | -5.45957 | 5.54E-07 | 1.50E-05 | 5.877467 |
| SUV420H1 | 0.304933 | 1.235361 | 7.045733 | 5.459278 | 5.55E-07 | 1.50E-05 | 5.876311 |
| LIPT1    | 0.345817 | 1.270871 | 6.918933 | 5.455836 | 5.63E-07 | 1.52E-05 | 5.862875 |
| UROD     | 0.169813 | 1.124912 | 9.3624   | 5.44778  | 5.82E-07 | 1.56E-05 | 5.831439 |
| DDN      | -0.41019 | 0.752526 | 7.238133 | -5.43824 | 6.05E-07 | 1.62E-05 | 5.794258 |
| CUL5     | 0.19479  | 1.144558 | 7.184667 | 5.435749 | 6.11E-07 | 1.63E-05 | 5.784533 |
| ZNF587B  | 0.410742 | 1.329369 | 5.447733 | 5.435401 | 6.12E-07 | 1.63E-05 | 5.783178 |
| SMARCE1  | 0.221402 | 1.165866 | 8.468    | 5.434273 | 6.14E-07 | 1.63E-05 | 5.77878  |
| MYL9     | -0.43475 | 0.739824 | 6.717333 | -5.4276  | 6.31E-07 | 1.67E-05 | 5.752803 |
| OXSM     | 0.198981 | 1.147887 | 7.7852   | 5.418746 | 6.54E-07 | 1.72E-05 | 5.718318 |
| THAP1    | 0.28572  | 1.219018 | 5.902    | 5.414983 | 6.64E-07 | 1.74E-05 | 5.703678 |
| ZNF226   | 0.233156 | 1.175403 | 5.409067 | 5.412134 | 6.72E-07 | 1.76E-05 | 5.692595 |
| EI24     | 0.188546 | 1.139614 | 7.6716   | 5.411879 | 6.73E-07 | 1.76E-05 | 5.691604 |
| ATP6V1C1 | 0.240217 | 1.181171 | 7.402667 | 5.404039 | 6.94E-07 | 1.80E-05 | 5.661118 |
| NES      | -0.34257 | 0.788635 | 7.0108   | -5.40376 | 6.95E-07 | 1.80E-05 | 5.660033 |
| COPS4    | 0.171454 | 1.126193 | 8.8176   | 5.400958 | 7.03E-07 | 1.81E-05 | 5.649147 |

|           |          |          |          |          |          |          |          |
|-----------|----------|----------|----------|----------|----------|----------|----------|
| JOSD1     | -0.33062 | 0.795193 | 7.399333 | -5.4002  | 7.05E-07 | 1.81E-05 | 5.646208 |
| CNN2      | -0.27415 | 0.826936 | 7.205733 | -5.40012 | 7.06E-07 | 1.81E-05 | 5.645905 |
| TPRKB     | 0.290405 | 1.222983 | 8.185333 | 5.395526 | 7.19E-07 | 1.84E-05 | 5.628043 |
| KATNA1    | 0.259588 | 1.197137 | 7.2632   | 5.39283  | 7.27E-07 | 1.86E-05 | 5.617573 |
| KRBOX4    | 0.310525 | 1.240159 | 6.7592   | 5.391457 | 7.31E-07 | 1.86E-05 | 5.612239 |
| TRIM14    | 0.269865 | 1.205695 | 6.62     | 5.39074  | 7.33E-07 | 1.86E-05 | 5.609457 |
| VPS37B    | -0.43588 | 0.73924  | 6.419067 | -5.37616 | 7.77E-07 | 1.97E-05 | 5.552898 |
| PTGER4    | -0.3742  | 0.771534 | 5.872267 | -5.37418 | 7.84E-07 | 1.98E-05 | 5.545191 |
| TNFRSF11I | 0.532436 | 1.44637  | 7.358267 | 5.371036 | 7.94E-07 | 2.00E-05 | 5.533013 |
| SMARCAL1  | 0.262481 | 1.19954  | 6.408667 | 5.36393  | 8.17E-07 | 2.05E-05 | 5.505475 |
| ABHD6     | 0.3553   | 1.279251 | 8.3376   | 5.361506 | 8.25E-07 | 2.06E-05 | 5.496085 |
| DCHS2     | -0.17839 | 0.88369  | 4.899067 | -5.35945 | 8.32E-07 | 2.07E-05 | 5.488131 |
| FAM206A   | 0.21958  | 1.164395 | 7.3736   | 5.351583 | 8.58E-07 | 2.13E-05 | 5.457666 |
| SULT1C2   | 0.248118 | 1.187657 | 8.9992   | 5.349679 | 8.65E-07 | 2.14E-05 | 5.450297 |
| TRIB1     | -0.60308 | 0.658347 | 7.3192   | -5.34887 | 8.68E-07 | 2.15E-05 | 5.447155 |
| ERBB3     | 0.304445 | 1.234944 | 8.297067 | 5.348027 | 8.71E-07 | 2.15E-05 | 5.443906 |
| MGA       | 0.330075 | 1.257079 | 5.838933 | 5.337003 | 9.10E-07 | 2.24E-05 | 5.401274 |
| AGA       | 0.298298 | 1.229693 | 6.987733 | 5.325885 | 9.52E-07 | 2.33E-05 | 5.358319 |
| KIAA1033  | 0.245705 | 1.185672 | 7.858267 | 5.322151 | 9.67E-07 | 2.36E-05 | 5.343902 |
| UTP14C    | 0.254063 | 1.192561 | 8.186933 | 5.321996 | 9.67E-07 | 2.36E-05 | 5.343306 |
| UBE2L3    | 0.213711 | 1.159667 | 7.9572   | 5.320331 | 9.74E-07 | 2.36E-05 | 5.336876 |
| DDAH1     | 0.176739 | 1.130326 | 11.1716  | 5.320026 | 9.75E-07 | 2.36E-05 | 5.335698 |
| DET1      | 0.218036 | 1.163149 | 5.872133 | 5.319045 | 9.79E-07 | 2.36E-05 | 5.331913 |
| TMEM184   | 0.210367 | 1.156983 | 7.853733 | 5.314962 | 9.95E-07 | 2.40E-05 | 5.316157 |
| SERPINI1  | 0.518568 | 1.432533 | 8.7416   | 5.31302  | 1.00E-06 | 2.41E-05 | 5.308666 |
| PREPL     | 0.209625 | 1.156388 | 8.104533 | 5.312402 | 1.01E-06 | 2.41E-05 | 5.30628  |
| PLA1A     | 0.45587  | 1.371609 | 6.9604   | 5.302666 | 1.05E-06 | 2.50E-05 | 5.268744 |
| RB1CC1    | 0.264123 | 1.200906 | 7.343867 | 5.295745 | 1.07E-06 | 2.56E-05 | 5.242077 |
| ATG5      | 0.202489 | 1.150682 | 6.8096   | 5.293813 | 1.08E-06 | 2.57E-05 | 5.234634 |
| NAB2      | -0.28384 | 0.821403 | 5.975467 | -5.29325 | 1.09E-06 | 2.57E-05 | 5.232472 |
| GNAI3     | 0.191732 | 1.142134 | 7.508267 | 5.292993 | 1.09E-06 | 2.57E-05 | 5.231478 |
| SERPINE1  | -0.7537  | 0.593079 | 5.568133 | -5.28475 | 1.12E-06 | 2.65E-05 | 5.199754 |
| F3        | -0.66269 | 0.631699 | 6.170933 | -5.28185 | 1.14E-06 | 2.67E-05 | 5.18859  |
| IL6R      | -0.47857 | 0.71769  | 6.283867 | -5.27792 | 1.15E-06 | 2.70E-05 | 5.173456 |
| DROSHA    | 0.202886 | 1.150999 | 7.088667 | 5.274861 | 1.17E-06 | 2.73E-05 | 5.161707 |
| TEFM      | 0.334483 | 1.260925 | 7.339333 | 5.272216 | 1.18E-06 | 2.75E-05 | 5.151542 |
| PRDM14    | -0.23761 | 0.84815  | 5.705733 | -5.26865 | 1.20E-06 | 2.78E-05 | 5.137849 |
| SMC4      | 0.223021 | 1.167175 | 5.5108   | 5.259545 | 1.24E-06 | 2.88E-05 | 5.10286  |
| GIN1      | 0.245675 | 1.185647 | 6.291733 | 5.258336 | 1.25E-06 | 2.88E-05 | 5.098218 |
| GLCE      | 0.281897 | 1.215792 | 5.554    | 5.254741 | 1.27E-06 | 2.92E-05 | 5.084418 |
| CSE1L     | 0.208673 | 1.155625 | 7.7996   | 5.25328  | 1.27E-06 | 2.93E-05 | 5.078814 |
| B4GALT5   | 0.456522 | 1.372229 | 8.1      | 5.252276 | 1.28E-06 | 2.93E-05 | 5.074959 |
| YRDC      | -0.2405  | 0.846451 | 7.100267 | -5.24987 | 1.29E-06 | 2.95E-05 | 5.065743 |
| BDKRB2    | -0.43798 | 0.738166 | 6.191733 | -5.24478 | 1.32E-06 | 3.00E-05 | 5.046188 |
| TRIP12    | 0.177804 | 1.13116  | 8.798533 | 5.243966 | 1.32E-06 | 3.01E-05 | 5.043085 |
| ZNF544    | 0.238793 | 1.180005 | 7.147333 | 5.242857 | 1.33E-06 | 3.01E-05 | 5.038833 |
| SNX13     | 0.174483 | 1.12856  | 6.987467 | 5.241263 | 1.34E-06 | 3.02E-05 | 5.032721 |

|          |          |          |          |          |          |          |          |
|----------|----------|----------|----------|----------|----------|----------|----------|
| HBB      | 1.761552 | 3.390626 | 8.666133 | 5.240176 | 1.34E-06 | 3.03E-05 | 5.028554 |
| FAM46C   | 0.272519 | 1.207915 | 6.3132   | 5.239331 | 1.35E-06 | 3.03E-05 | 5.025314 |
| CHGB     | -0.60848 | 0.655888 | 5.6032   | -5.23888 | 1.35E-06 | 3.03E-05 | 5.023573 |
| PLK3     | -0.3213  | 0.800346 | 5.157067 | -5.22666 | 1.42E-06 | 3.17E-05 | 4.976769 |
| MIS18A   | 0.188576 | 1.139638 | 5.998133 | 5.226393 | 1.42E-06 | 3.17E-05 | 4.975755 |
| UPF2     | 0.26003  | 1.197504 | 6.417067 | 5.225469 | 1.42E-06 | 3.17E-05 | 4.972219 |
| FRK      | 0.309925 | 1.239643 | 5.078533 | 5.223607 | 1.43E-06 | 3.18E-05 | 4.965089 |
| APOE     | 0.341259 | 1.266862 | 11.75587 | 5.221758 | 1.45E-06 | 3.19E-05 | 4.958012 |
| LARS2    | 0.267631 | 1.20383  | 7.178267 | 5.221756 | 1.45E-06 | 3.19E-05 | 4.958006 |
| C3orf14  | 0.306529 | 1.236729 | 6.596133 | 5.220911 | 1.45E-06 | 3.19E-05 | 4.954771 |
| PSMD1    | 0.147031 | 1.107289 | 8.6412   | 5.21736  | 1.47E-06 | 3.23E-05 | 4.941188 |
| ELL2     | -0.56476 | 0.676068 | 6.3188   | -5.21445 | 1.49E-06 | 3.26E-05 | 4.93007  |
| DPP8     | 0.235787 | 1.177549 | 8.339867 | 5.207146 | 1.53E-06 | 3.35E-05 | 4.902134 |
| TUG1     | 0.234333 | 1.176363 | 8.018    | 5.200593 | 1.57E-06 | 3.43E-05 | 4.877096 |
| ZNF106   | 0.276649 | 1.211378 | 7.920667 | 5.197407 | 1.59E-06 | 3.46E-05 | 4.864931 |
| USP11    | -0.21514 | 0.861461 | 7.893333 | -5.19571 | 1.60E-06 | 3.48E-05 | 4.858451 |
| SREBF2   | -0.19195 | 0.875422 | 6.341867 | -5.18814 | 1.65E-06 | 3.57E-05 | 4.829554 |
| ZNF468   | 0.269745 | 1.205595 | 5.403867 | 5.181497 | 1.70E-06 | 3.66E-05 | 4.804225 |
| CBR4     | 0.314693 | 1.243747 | 8.267333 | 5.180226 | 1.71E-06 | 3.67E-05 | 4.799379 |
| TRIM8    | 0.184865 | 1.136711 | 8.362133 | 5.177797 | 1.72E-06 | 3.70E-05 | 4.79012  |
| ATR      | 0.213786 | 1.159727 | 5.828533 | 5.165976 | 1.81E-06 | 3.86E-05 | 4.745085 |
| CEP57    | 0.20982  | 1.156544 | 6.482    | 5.16306  | 1.83E-06 | 3.90E-05 | 4.733985 |
| SERPINE2 | 0.613621 | 1.530094 | 9.492267 | 5.162169 | 1.83E-06 | 3.90E-05 | 4.730594 |
| SPATA7   | 0.235382 | 1.177219 | 6.236667 | 5.158456 | 1.86E-06 | 3.94E-05 | 4.716465 |
| FRY      | -0.34551 | 0.78703  | 4.990533 | -5.1567  | 1.87E-06 | 3.94E-05 | 4.709775 |
| NUP43    | 0.30422  | 1.234751 | 6.793067 | 5.156114 | 1.88E-06 | 3.94E-05 | 4.707556 |
| PMS1     | 0.238471 | 1.179741 | 6.6196   | 5.155902 | 1.88E-06 | 3.94E-05 | 4.706748 |
| NIF3L1   | 0.199768 | 1.148513 | 8.5392   | 5.155753 | 1.88E-06 | 3.94E-05 | 4.70618  |
| WDR37    | 0.218928 | 1.163868 | 7.004    | 5.155727 | 1.88E-06 | 3.94E-05 | 4.706083 |
| SPRY2    | -0.3033  | 0.810398 | 6.645333 | -5.15498 | 1.89E-06 | 3.95E-05 | 4.703241 |
| GATA6    | -0.39685 | 0.759514 | 4.171333 | -5.15181 | 1.91E-06 | 3.99E-05 | 4.691194 |
| NSF      | 0.201274 | 1.149713 | 8.28     | 5.147019 | 1.95E-06 | 4.05E-05 | 4.672972 |
| GNS      | 0.310735 | 1.240339 | 9.474933 | 5.136996 | 2.03E-06 | 4.21E-05 | 4.634897 |
| DYNC1LI1 | 0.210877 | 1.157392 | 7.3748   | 5.136178 | 2.03E-06 | 4.21E-05 | 4.63179  |
| TMEM140  | 0.456874 | 1.372565 | 8.114267 | 5.134813 | 2.04E-06 | 4.22E-05 | 4.626607 |
| UBE2B    | 0.141597 | 1.103125 | 8.514533 | 5.132536 | 2.06E-06 | 4.25E-05 | 4.617963 |
| DBT      | 0.308178 | 1.238143 | 6.905467 | 5.129651 | 2.09E-06 | 4.29E-05 | 4.607016 |
| MRS2     | 0.269048 | 1.205012 | 6.369467 | 5.128694 | 2.09E-06 | 4.30E-05 | 4.603383 |
| SPATA5L1 | 0.228718 | 1.171793 | 6.062133 | 5.125728 | 2.12E-06 | 4.34E-05 | 4.592133 |
| THSD4    | -0.22915 | 0.85314  | 5.072267 | -5.12452 | 2.13E-06 | 4.34E-05 | 4.587537 |
| CALML4   | 0.308868 | 1.238735 | 8.905733 | 5.124072 | 2.13E-06 | 4.34E-05 | 4.585851 |
| GRSF1    | 0.18012  | 1.132978 | 7.615733 | 5.12241  | 2.15E-06 | 4.36E-05 | 4.579548 |
| PEX12    | 0.193471 | 1.143511 | 7.3072   | 5.118334 | 2.18E-06 | 4.42E-05 | 4.564093 |
| AK2      | 0.239723 | 1.180766 | 7.259867 | 5.11347  | 2.22E-06 | 4.50E-05 | 4.545662 |
| CETN3    | 0.340577 | 1.266263 | 7.379733 | 5.110464 | 2.25E-06 | 4.54E-05 | 4.534276 |
| CETN2    | 0.168321 | 1.12375  | 9.839867 | 5.108816 | 2.26E-06 | 4.56E-05 | 4.528034 |
| EPHA2    | -0.4475  | 0.733314 | 5.876533 | -5.10791 | 2.27E-06 | 4.56E-05 | 4.524615 |



|           |          |          |          |          |          |          |          |
|-----------|----------|----------|----------|----------|----------|----------|----------|
| ERBB2IP   | 0.342504 | 1.267955 | 8.272    | 5.107544 | 2.28E-06 | 4.56E-05 | 4.523215 |
| XPNPEP1   | 0.191552 | 1.141991 | 8.239067 | 5.104913 | 2.30E-06 | 4.60E-05 | 4.513255 |
| PHF1      | -0.17756 | 0.884199 | 8.327867 | -5.10161 | 2.33E-06 | 4.65E-05 | 4.50075  |
| PDE6G     | -0.18753 | 0.878106 | 6.6764   | -5.09532 | 2.39E-06 | 4.75E-05 | 4.476968 |
| ZNF83     | 0.238103 | 1.179441 | 5.607067 | 5.094737 | 2.39E-06 | 4.75E-05 | 4.474751 |
| FRYL      | 0.208816 | 1.155739 | 6.408133 | 5.088753 | 2.45E-06 | 4.85E-05 | 4.452126 |
| DUSP2     | -0.30486 | 0.809522 | 5.2256   | -5.08747 | 2.46E-06 | 4.87E-05 | 4.447281 |
| DRG1      | 0.140735 | 1.102466 | 9.4892   | 5.083352 | 2.50E-06 | 4.94E-05 | 4.431713 |
| CDKN1C    | -0.38169 | 0.767536 | 8.408933 | -5.08003 | 2.54E-06 | 4.99E-05 | 4.419186 |
| LSM5      | 0.198426 | 1.147446 | 5.819333 | 5.079574 | 2.54E-06 | 4.99E-05 | 4.417444 |
| PIK3C2A   | 0.201027 | 1.149516 | 7.5836   | 5.078836 | 2.55E-06 | 4.99E-05 | 4.41466  |
| NEDD4     | 0.268853 | 1.20485  | 6.562    | 5.074381 | 2.59E-06 | 5.07E-05 | 4.397838 |
| KIDINS220 | 0.23066  | 1.173371 | 7.272667 | 5.072875 | 2.61E-06 | 5.08E-05 | 4.392153 |
| TNFAIP8   | 0.55949  | 1.473748 | 6.505467 | 5.070791 | 2.63E-06 | 5.11E-05 | 4.384289 |
| ERGC2     | 0.257309 | 1.195247 | 7.716667 | 5.069009 | 2.65E-06 | 5.14E-05 | 4.377568 |
| FBXL4     | 0.223081 | 1.167224 | 5.743867 | 5.064704 | 2.70E-06 | 5.21E-05 | 4.361328 |
| BRCC3     | 0.315322 | 1.24429  | 6.054533 | 5.058789 | 2.76E-06 | 5.32E-05 | 4.339029 |
| NUP133    | 0.202624 | 1.150789 | 7.214    | 5.058672 | 2.76E-06 | 5.32E-05 | 4.338586 |
| GAS6      | -0.25191 | 0.839783 | 7.649333 | -5.05668 | 2.78E-06 | 5.35E-05 | 4.331063 |
| PFAS      | 0.211439 | 1.157843 | 7.1948   | 5.055763 | 2.79E-06 | 5.35E-05 | 4.327625 |
| PDZRN3    | 0.348786 | 1.273488 | 5.905733 | 5.054259 | 2.81E-06 | 5.37E-05 | 4.321959 |
| RBBP8     | -0.39499 | 0.760493 | 9.0864   | -5.05063 | 2.85E-06 | 5.44E-05 | 4.308301 |
| ZNF146    | 0.216822 | 1.16217  | 7.122533 | 5.04965  | 2.86E-06 | 5.45E-05 | 4.304599 |
| RNF128    | 0.240697 | 1.181563 | 9.4572   | 5.048815 | 2.87E-06 | 5.45E-05 | 4.301455 |
| RIN2      | 0.313583 | 1.242791 | 9.5056   | 5.044628 | 2.92E-06 | 5.53E-05 | 4.285694 |
| DNAJC22   | 0.278688 | 1.213091 | 7.324933 | 5.043093 | 2.94E-06 | 5.54E-05 | 4.279919 |
| GGA2      | 0.166882 | 1.122629 | 7.326267 | 5.042892 | 2.94E-06 | 5.54E-05 | 4.27916  |
| KIFAP3    | 0.202789 | 1.150921 | 8.164933 | 5.042681 | 2.94E-06 | 5.54E-05 | 4.278369 |
| GEMIN6    | 0.206709 | 1.154053 | 7.916667 | 5.040137 | 2.97E-06 | 5.58E-05 | 4.268796 |
| CTR9      | 0.296042 | 1.227771 | 7.6336   | 5.036387 | 3.01E-06 | 5.65E-05 | 4.254692 |
| RNF34     | 0.214003 | 1.159902 | 7.4584   | 5.03334  | 3.05E-06 | 5.70E-05 | 4.243233 |
| E2F4      | -0.18374 | 0.880417 | 8.237867 | -5.03094 | 3.08E-06 | 5.74E-05 | 4.234211 |
| RAD23B    | 0.164393 | 1.120694 | 8.684    | 5.030156 | 3.09E-06 | 5.74E-05 | 4.231265 |
| LINC00963 | -0.20445 | 0.867868 | 4.687467 | -5.03014 | 3.09E-06 | 5.74E-05 | 4.231198 |
| IMPACT    | 0.212339 | 1.158565 | 5.3408   | 5.029043 | 3.10E-06 | 5.74E-05 | 4.227083 |
| SNAP23    | 0.257496 | 1.195402 | 6.76     | 5.028742 | 3.11E-06 | 5.74E-05 | 4.225949 |
| KLF4      | -0.46905 | 0.722441 | 5.4332   | -5.02681 | 3.13E-06 | 5.78E-05 | 4.218691 |
| SSX2IP    | 0.23997  | 1.180968 | 6.996267 | 5.025028 | 3.15E-06 | 5.80E-05 | 4.211996 |
| ZNF84     | 0.228238 | 1.171404 | 5.5276   | 5.024149 | 3.16E-06 | 5.81E-05 | 4.208694 |
| GDI1      | -0.17196 | 0.887638 | 7.415467 | -5.02345 | 3.17E-06 | 5.81E-05 | 4.206075 |
| RHOBTB3   | -0.34648 | 0.786502 | 6.467333 | -5.02081 | 3.20E-06 | 5.86E-05 | 4.196146 |
| CINP      | 0.250892 | 1.189943 | 7.108533 | 5.019823 | 3.22E-06 | 5.87E-05 | 4.192451 |
| AMPH      | -0.22598 | 0.855013 | 4.866533 | -5.01932 | 3.22E-06 | 5.87E-05 | 4.190566 |
| EGR3      | -0.59053 | 0.664098 | 4.4284   | -5.01281 | 3.31E-06 | 6.01E-05 | 4.166114 |
| ATP10A    | -0.27999 | 0.823595 | 5.965867 | -5.01146 | 3.32E-06 | 6.03E-05 | 4.161054 |
| TNNT2     | -0.41759 | 0.748676 | 5.788533 | -5.0101  | 3.34E-06 | 6.05E-05 | 4.155949 |
| MAEA      | 0.188741 | 1.139768 | 8.699067 | 5.009643 | 3.35E-06 | 6.05E-05 | 4.154249 |

|          |          |          |          |          |          |          |          |
|----------|----------|----------|----------|----------|----------|----------|----------|
| R3HDM1   | 0.185052 | 1.136858 | 7.595467 | 5.004961 | 3.41E-06 | 6.13E-05 | 4.136692 |
| CCNC     | 0.194295 | 1.144165 | 9.781867 | 5.004933 | 3.41E-06 | 6.13E-05 | 4.136587 |
| PTP4A1   | -0.25506 | 0.837952 | 7.743333 | -5.00343 | 3.43E-06 | 6.16E-05 | 4.130953 |
| PRELP    | -0.18778 | 0.877955 | 6.51     | -5.00159 | 3.45E-06 | 6.19E-05 | 4.124041 |
| RPE      | 0.181042 | 1.133702 | 7.084133 | 4.998692 | 3.49E-06 | 6.25E-05 | 4.113197 |
| ATOX1    | 0.212466 | 1.158667 | 10.56107 | 4.997834 | 3.51E-06 | 6.25E-05 | 4.109983 |
| CFAP45   | -0.21715 | 0.860262 | 6.3256   | -4.99537 | 3.54E-06 | 6.30E-05 | 4.10076  |
| CCL4     | -0.65236 | 0.636238 | 6.646667 | -4.9897  | 3.62E-06 | 6.43E-05 | 4.07954  |
| PLCE1    | -0.36251 | 0.777809 | 5.166133 | -4.98517 | 3.68E-06 | 6.53E-05 | 4.062555 |
| GLS      | 0.192736 | 1.142929 | 10.49213 | 4.984402 | 3.70E-06 | 6.54E-05 | 4.059699 |
| ACTR6    | 0.28066  | 1.21475  | 6.962    | 4.983214 | 3.71E-06 | 6.55E-05 | 4.055255 |
| IL1RAPL2 | -0.21006 | 0.864501 | 5.085733 | -4.98054 | 3.75E-06 | 6.61E-05 | 4.045243 |
| MXRA8    | -0.25551 | 0.837691 | 7.305333 | -4.97909 | 3.77E-06 | 6.63E-05 | 4.039822 |
| PDCD10   | 0.193403 | 1.143458 | 9.8      | 4.97119  | 3.89E-06 | 6.82E-05 | 4.010303 |
| NME5     | 0.265142 | 1.201755 | 8.726    | 4.970799 | 3.90E-06 | 6.82E-05 | 4.008843 |
| KIAA0040 | -0.19782 | 0.871868 | 5.715467 | -4.96697 | 3.96E-06 | 6.91E-05 | 3.994548 |
| PLSCR4   | 0.292609 | 1.224853 | 8.310533 | 4.965287 | 3.98E-06 | 6.94E-05 | 3.988256 |
| SMAP1    | 0.248186 | 1.187713 | 8.0864   | 4.960778 | 4.05E-06 | 7.05E-05 | 3.971424 |
| KLF9     | -0.44481 | 0.73468  | 7.086267 | -4.95656 | 4.12E-06 | 7.15E-05 | 3.955674 |
| RPA1     | 0.21512  | 1.1608   | 7.324267 | 4.952244 | 4.19E-06 | 7.26E-05 | 3.939587 |
| SEMA3G   | -0.43278 | 0.740832 | 5.650267 | -4.94287 | 4.35E-06 | 7.51E-05 | 3.904643 |
| FERMT2   | -0.25508 | 0.837939 | 7.820933 | -4.94143 | 4.37E-06 | 7.54E-05 | 3.899299 |
| ARHGEF17 | -0.21442 | 0.861895 | 7.124267 | -4.93965 | 4.40E-06 | 7.58E-05 | 3.892636 |
| METTL18  | 0.263411 | 1.200313 | 5.6912   | 4.93741  | 4.44E-06 | 7.63E-05 | 3.884313 |
| KHK      | 0.27533  | 1.210271 | 10.1432  | 4.936224 | 4.46E-06 | 7.65E-05 | 3.879897 |
| USP47    | 0.202271 | 1.150508 | 7.739733 | 4.934473 | 4.49E-06 | 7.69E-05 | 3.873382 |
| SLC20A1  | -0.45855 | 0.727716 | 7.229867 | -4.93322 | 4.51E-06 | 7.71E-05 | 3.868724 |
| FAM8A1   | 0.232151 | 1.174585 | 9.0552   | 4.92836  | 4.60E-06 | 7.84E-05 | 3.850633 |
| RIT1     | 0.439475 | 1.356111 | 6.7208   | 4.926629 | 4.63E-06 | 7.88E-05 | 3.844194 |
| CSRP1    | -0.32164 | 0.800159 | 8.911067 | -4.92133 | 4.73E-06 | 8.02E-05 | 3.824481 |
| UBR2     | 0.173921 | 1.12812  | 7.227467 | 4.918183 | 4.78E-06 | 8.08E-05 | 3.812799 |
| XPOT     | 0.235742 | 1.177512 | 7.995067 | 4.918165 | 4.79E-06 | 8.08E-05 | 3.812732 |
| RRAGC    | 0.226034 | 1.169616 | 8.6224   | 4.917924 | 4.79E-06 | 8.08E-05 | 3.811837 |
| GGCT     | 0.222241 | 1.166545 | 9.160933 | 4.915575 | 4.83E-06 | 8.11E-05 | 3.803108 |
| ZNF277   | 0.283711 | 1.217322 | 6.994267 | 4.915334 | 4.84E-06 | 8.11E-05 | 3.802215 |
| DNAJC16  | 0.267976 | 1.204117 | 7.9084   | 4.915089 | 4.84E-06 | 8.11E-05 | 3.801305 |
| MPP3     | -0.24049 | 0.846455 | 5.6644   | -4.91472 | 4.85E-06 | 8.11E-05 | 3.799917 |
| TIMP3    | -0.34644 | 0.786523 | 7.478    | -4.91443 | 4.86E-06 | 8.11E-05 | 3.798853 |
| SKIV2L2  | 0.195075 | 1.144784 | 7.851733 | 4.912485 | 4.89E-06 | 8.16E-05 | 3.791633 |
| EDN1     | -0.35689 | 0.780847 | 5.906133 | -4.91097 | 4.92E-06 | 8.19E-05 | 3.786002 |
| CAPN7    | 0.253951 | 1.192468 | 7.024933 | 4.909441 | 4.95E-06 | 8.22E-05 | 3.780331 |
| FABP3    | 0.442556 | 1.35901  | 8.7696   | 4.907456 | 4.99E-06 | 8.26E-05 | 3.772961 |
| OSBPL9   | 0.237091 | 1.178614 | 9.559067 | 4.907289 | 4.99E-06 | 8.26E-05 | 3.772344 |
| PSMD14   | 0.200172 | 1.148836 | 9.7924   | 4.906397 | 5.01E-06 | 8.27E-05 | 3.769033 |
| PPFIBP2  | 0.294798 | 1.226713 | 7.737467 | 4.90512  | 5.03E-06 | 8.30E-05 | 3.764293 |
| UBA6     | 0.197804 | 1.146951 | 5.426267 | 4.901614 | 5.10E-06 | 8.38E-05 | 3.751286 |
| TPMT     | 0.217249 | 1.162515 | 8.088133 | 4.901589 | 5.10E-06 | 8.38E-05 | 3.751193 |

|           |          |          |          |          |          |          |          |
|-----------|----------|----------|----------|----------|----------|----------|----------|
| ZNF330    | 0.181222 | 1.133844 | 6.963333 | 4.900366 | 5.13E-06 | 8.40E-05 | 3.746658 |
| USP16     | 0.177729 | 1.131102 | 7.6172   | 4.899583 | 5.14E-06 | 8.41E-05 | 3.743751 |
| CDKN1B    | 0.353988 | 1.278089 | 8.084267 | 4.898037 | 5.17E-06 | 8.44E-05 | 3.738019 |
| CRISPLD2  | -0.5466  | 0.68463  | 7.609733 | -4.89714 | 5.19E-06 | 8.46E-05 | 3.734698 |
| GPR183    | -0.24169 | 0.845756 | 4.3372   | -4.89464 | 5.24E-06 | 8.52E-05 | 3.725434 |
| GPR137B   | 0.277549 | 1.212134 | 9.926667 | 4.890814 | 5.32E-06 | 8.64E-05 | 3.711249 |
| C1orf21   | -0.22028 | 0.858396 | 5.407867 | -4.88913 | 5.36E-06 | 8.68E-05 | 3.704996 |
| ACP2      | 0.208546 | 1.155523 | 8.699333 | 4.887501 | 5.39E-06 | 8.71E-05 | 3.698974 |
| ITPR2     | 0.173021 | 1.127417 | 5.741467 | 4.884723 | 5.45E-06 | 8.79E-05 | 3.688687 |
| ZNF185    | -0.2145  | 0.861846 | 6.5788   | -4.87876 | 5.58E-06 | 8.98E-05 | 3.666617 |
| CTSA      | 0.233201 | 1.17544  | 10.99387 | 4.877243 | 5.61E-06 | 9.02E-05 | 3.661003 |
| LDAH      | 0.217496 | 1.162714 | 6.454533 | 4.876134 | 5.63E-06 | 9.03E-05 | 3.6569   |
| IL4R      | -0.25926 | 0.835518 | 6.318667 | -4.87594 | 5.64E-06 | 9.03E-05 | 3.656165 |
| CPT2      | 0.23449  | 1.176491 | 7.9948   | 4.873426 | 5.69E-06 | 9.08E-05 | 3.646884 |
| TFB2M     | 0.295112 | 1.226981 | 8.191067 | 4.873338 | 5.69E-06 | 9.08E-05 | 3.646556 |
| PQLC1     | -0.44762 | 0.733253 | 9.1604   | -4.87183 | 5.73E-06 | 9.12E-05 | 3.64097  |
| TRPM6     | -0.26107 | 0.834468 | 5.1284   | -4.87041 | 5.76E-06 | 9.15E-05 | 3.635723 |
| WDR11     | 0.301177 | 1.232149 | 6.984933 | 4.869368 | 5.78E-06 | 9.17E-05 | 3.631881 |
| ICE1      | 0.240142 | 1.181109 | 7.521333 | 4.866995 | 5.84E-06 | 9.24E-05 | 3.623109 |
| VDAC3     | 0.186394 | 1.137916 | 10.40533 | 4.863531 | 5.92E-06 | 9.33E-05 | 3.610308 |
| RBM7      | 0.245607 | 1.185592 | 7.284533 | 4.863406 | 5.92E-06 | 9.33E-05 | 3.609849 |
| SMARCA5   | 0.190352 | 1.141042 | 6.267733 | 4.85577  | 6.10E-06 | 9.57E-05 | 3.58165  |
| HIST1H2BI | 0.364708 | 1.287621 | 9.644933 | 4.855619 | 6.10E-06 | 9.57E-05 | 3.581094 |
| UEVLD     | 0.195367 | 1.145016 | 5.942933 | 4.855488 | 6.10E-06 | 9.57E-05 | 3.580607 |
| PPP1R3C   | 0.482841 | 1.397493 | 7.092133 | 4.854294 | 6.13E-06 | 9.60E-05 | 3.5762   |
| DENND4B   | -0.18374 | 0.880417 | 6.837867 | -4.85326 | 6.15E-06 | 9.62E-05 | 3.572373 |
| BACE2     | -0.41673 | 0.74912  | 7.079733 | -4.85271 | 6.17E-06 | 9.62E-05 | 3.570363 |
| SYNRG     | 0.186792 | 1.13823  | 7.6644   | 4.849612 | 6.24E-06 | 9.72E-05 | 3.558926 |
| TNFSF8    | -0.17633 | 0.884953 | 5.065733 | -4.84608 | 6.33E-06 | 9.83E-05 | 3.545887 |
| RUFY1     | 0.173021 | 1.127417 | 8.181467 | 4.843206 | 6.40E-06 | 9.93E-05 | 3.535305 |
| CCDC90B   | 0.19446  | 1.144296 | 7.3428   | 4.842662 | 6.41E-06 | 9.93E-05 | 3.533297 |

Table S1 Plum vs. Control

| Gene     | logFC    | UnlogFC  | AveExpr  | t        | P.Value  | adj.P.Val | B        |
|----------|----------|----------|----------|----------|----------|-----------|----------|
| COL4A2   | 1.08828  | 2.126204 | 7.810769 | 12.60573 | 7.54E-22 | 3.22E-18  | 39.1825  |
| COL4A1   | 1.136454 | 2.1984   | 8.462418 | 12.60372 | 7.61E-22 | 3.22E-18  | 39.17328 |
| LPCAT1   | 0.908783 | 1.877461 | 6.704615 | 12.42445 | 1.77E-21 | 4.98E-18  | 38.34874 |
| TMSB10   | 1.18343  | 2.271161 | 11.59956 | 12.26851 | 3.68E-21 | 7.78E-18  | 37.62882 |
| TNFAIP8  | 1.249314 | 2.377284 | 6.906923 | 12.21801 | 4.67E-21 | 7.90E-18  | 37.39518 |
| WFDC2    | 2.002077 | 4.005764 | 9.673516 | 12.13636 | 6.88E-21 | 9.69E-18  | 37.01683 |
| HEXB     | 0.793406 | 1.733161 | 10.2756  | 12.04328 | 1.07E-20 | 1.29E-17  | 36.58472 |
| LAPTM4B  | 0.582203 | 1.497134 | 9.787033 | 11.87544 | 2.37E-20 | 2.51E-17  | 35.80352 |
| CASP6    | 0.480821 | 1.395538 | 6.934725 | 11.81967 | 3.09E-20 | 2.91E-17  | 35.54335 |
| MYOF     | 0.853048 | 1.806314 | 7.349011 | 11.79576 | 3.47E-20 | 2.93E-17  | 35.43175 |
| S100A11  | 1.026126 | 2.036548 | 9.253077 | 11.75861 | 4.14E-20 | 3.18E-17  | 35.2582  |
| PLOD2    | 0.659135 | 1.579136 | 7.217033 | 11.71166 | 5.18E-20 | 3.65E-17  | 35.03874 |
| TXNDC9   | 0.487739 | 1.402246 | 8.839451 | 11.60129 | 8.77E-20 | 5.70E-17  | 34.52201 |
| YWHAH    | 0.844647 | 1.795826 | 7.506813 | 11.43275 | 1.96E-19 | 1.19E-16  | 33.73102 |
| GALNT1   | 0.582778 | 1.49773  | 7.493187 | 11.35318 | 2.88E-19 | 1.61E-16  | 33.35677 |
| MAPT     | -0.68789 | 0.620762 | 7.414835 | -11.341  | 3.05E-19 | 1.61E-16  | 33.29965 |
| SERPINE2 | 1.155222 | 2.227186 | 9.826264 | 11.32055 | 3.37E-19 | 1.67E-16  | 33.20315 |
| PDIA6    | 0.515198 | 1.42919  | 9.878681 | 11.25638 | 4.58E-19 | 2.11E-16  | 32.90083 |
| PPIC     | 0.582019 | 1.496943 | 8.518681 | 11.24936 | 4.74E-19 | 2.11E-16  | 32.8677  |
| PROM1    | 1.731454 | 3.320623 | 8.111648 | 11.19072 | 6.28E-19 | 2.65E-16  | 32.59112 |
| ANXA2    | 1.074874 | 2.106539 | 10.59088 | 11.16691 | 7.04E-19 | 2.84E-16  | 32.47878 |
| ARPC2    | 0.394599 | 1.314577 | 9.902088 | 11.06853 | 1.13E-18 | 4.35E-16  | 32.01405 |
| GALNT7   | 0.930527 | 1.905972 | 7.043846 | 10.93094 | 2.20E-18 | 8.07E-16  | 31.36299 |
| NROB2    | -0.72054 | 0.606872 | 6.37956  | -10.8591 | 3.11E-18 | 1.09E-15  | 31.02231 |
| RAB11A   | 0.32915  | 1.256273 | 8.774505 | 10.78483 | 4.45E-18 | 1.50E-15  | 30.67026 |
| CMTM6    | 0.55129  | 1.465395 | 9.130659 | 10.77642 | 4.63E-18 | 1.51E-15  | 30.63033 |
| PPIB     | 0.516275 | 1.430258 | 10.29769 | 10.76234 | 4.96E-18 | 1.52E-15  | 30.56352 |
| YWHAB    | 0.319773 | 1.248134 | 10.04791 | 10.75963 | 5.03E-18 | 1.52E-15  | 30.55067 |
| NMI      | 0.866473 | 1.823201 | 7.11978  | 10.75246 | 5.20E-18 | 1.52E-15  | 30.51664 |
| VIM      | 1.181101 | 2.267498 | 10.73363 | 10.72857 | 5.84E-18 | 1.65E-15  | 30.40319 |
| QPCT     | 1.423758 | 2.682835 | 5.383187 | 10.69301 | 6.94E-18 | 1.89E-15  | 30.23427 |
| LTF      | 3.318444 | 9.975882 | 8.430989 | 10.67257 | 7.66E-18 | 2.02E-15  | 30.13719 |
| PLSCR1   | 0.876614 | 1.83606  | 8.821099 | 10.62418 | 9.69E-18 | 2.48E-15  | 29.90718 |
| PHF1     | -0.30941 | 0.806971 | 8.243516 | -10.5846 | 1.17E-17 | 2.92E-15  | 29.71906 |
| TPM1     | 0.806502 | 1.748966 | 8.891429 | 10.52197 | 1.59E-17 | 3.84E-15  | 29.42094 |
| PDIA4    | 0.517493 | 1.431465 | 7.593077 | 10.51067 | 1.68E-17 | 3.94E-15  | 29.36715 |
| PSMB8    | 0.957667 | 1.942166 | 7.448571 | 10.50406 | 1.73E-17 | 3.96E-15  | 29.33567 |
| LAMC1    | 0.450932 | 1.366923 | 7.944945 | 10.44027 | 2.36E-17 | 5.26E-15  | 29.03191 |
| CFB      | 1.547126 | 2.922343 | 7.645714 | 10.41763 | 2.64E-17 | 5.72E-15  | 28.92408 |
| HLA-B    | 0.898256 | 1.863812 | 11.34571 | 10.4022  | 2.84E-17 | 6.01E-15  | 28.85054 |
| MMP7     | 2.002652 | 4.00736  | 9.53967  | 10.35906 | 3.51E-17 | 7.23E-15  | 28.64493 |
| ARFIP1   | 0.376145 | 1.297869 | 6.762527 | 10.31619 | 4.32E-17 | 8.69E-15  | 28.44054 |
| FARP1    | 0.450662 | 1.366667 | 8.792637 | 10.28645 | 4.99E-17 | 9.81E-15  | 28.29869 |
| S100A10  | 0.761976 | 1.695812 | 11.02571 | 10.23226 | 6.49E-17 | 1.25E-14  | 28.04014 |
| APOH     | -1.65368 | 0.317828 | 8.196593 | -10.2054 | 7.40E-17 | 1.39E-14  | 27.91218 |

|          |          |          |          |          |          |          |          |
|----------|----------|----------|----------|----------|----------|----------|----------|
| NEU1     | 0.527126 | 1.441055 | 8.731319 | 10.19252 | 7.88E-17 | 1.45E-14 | 27.85048 |
| ACTN1    | 0.939246 | 1.917526 | 7.110549 | 10.17285 | 8.67E-17 | 1.56E-14 | 27.75657 |
| ALDH18A1 | 0.565333 | 1.479729 | 7.91956  | 10.11667 | 1.14E-16 | 2.01E-14 | 27.4883  |
| IL32     | 1.5747   | 2.978736 | 8.00022  | 10.09868 | 1.24E-16 | 2.14E-14 | 27.40236 |
| PLP2     | 0.878894 | 1.838965 | 7.374835 | 10.09427 | 1.27E-16 | 2.15E-14 | 27.38131 |
| HRG      | -1.13659 | 0.454832 | 8.251209 | -10.0774 | 1.38E-16 | 2.29E-14 | 27.30092 |
| FKBP3    | 0.47587  | 1.390756 | 7.879451 | 10.07326 | 1.41E-16 | 2.29E-14 | 27.28094 |
| VWA5A    | 0.411874 | 1.330413 | 7.098022 | 10.04402 | 1.62E-16 | 2.59E-14 | 27.14124 |
| SHTN1    | 0.667522 | 1.588342 | 7.108571 | 10.01838 | 1.84E-16 | 2.88E-14 | 27.0187  |
| WWC1     | 0.464546 | 1.379883 | 8.014286 | 10.01235 | 1.89E-16 | 2.91E-14 | 26.98988 |
| ESYT1    | 0.608744 | 1.524931 | 7.964505 | 9.99276  | 2.08E-16 | 3.14E-14 | 26.89624 |
| CLIC1    | 0.599396 | 1.515082 | 10.12923 | 9.963284 | 2.40E-16 | 3.56E-14 | 26.75534 |
| P4HB     | 0.44813  | 1.364271 | 9.887473 | 9.956426 | 2.49E-16 | 3.62E-14 | 26.72256 |
| TIMP1    | 1.592691 | 3.016114 | 8.518681 | 9.949645 | 2.57E-16 | 3.68E-14 | 26.69014 |
| S100A13  | 0.848048 | 1.800064 | 9.141538 | 9.94205  | 2.67E-16 | 3.76E-14 | 26.65383 |
| GNAI3    | 0.373425 | 1.295425 | 7.618791 | 9.936932 | 2.73E-16 | 3.79E-14 | 26.62936 |
| SMARCE1  | 0.424053 | 1.341692 | 8.592088 | 9.926727 | 2.87E-16 | 3.92E-14 | 26.58056 |
| JAK1     | 0.54499  | 1.459011 | 8.664066 | 9.906654 | 3.17E-16 | 4.25E-14 | 26.48459 |
| CD63     | 0.334986 | 1.261365 | 11.66    | 9.891579 | 3.41E-16 | 4.50E-14 | 26.4125  |
| DCK      | 0.580836 | 1.495715 | 5.384835 | 9.887118 | 3.48E-16 | 4.53E-14 | 26.39116 |
| FTCD     | -1.03689 | 0.487376 | 8.777033 | -9.87895 | 3.62E-16 | 4.64E-14 | 26.35212 |
| CBX6     | 0.405295 | 1.324359 | 8.158681 | 9.872352 | 3.74E-16 | 4.72E-14 | 26.32055 |
| PON2     | 0.784758 | 1.722804 | 8.552198 | 9.857227 | 4.03E-16 | 5.01E-14 | 26.24821 |
| SERPING1 | 1.126372 | 2.183091 | 8.303736 | 9.83807  | 4.42E-16 | 5.42E-14 | 26.15658 |
| CLU      | 1.172217 | 2.253578 | 8.949451 | 9.824115 | 4.73E-16 | 5.72E-14 | 26.08983 |
| TUBA1A   | 1.124686 | 2.180541 | 9.897033 | 9.807418 | 5.14E-16 | 6.12E-14 | 26.00995 |
| NAGK     | 0.387536 | 1.308157 | 8.780769 | 9.774912 | 6.02E-16 | 7.07E-14 | 25.85444 |
| RPA1     | 0.382913 | 1.303972 | 7.43044  | 9.765957 | 6.29E-16 | 7.28E-14 | 25.8116  |
| MANSC1   | 0.619995 | 1.53687  | 5.646374 | 9.733756 | 7.36E-16 | 8.40E-14 | 25.65753 |
| RARS     | 0.493444 | 1.407802 | 8.899011 | 9.727985 | 7.56E-16 | 8.53E-14 | 25.62991 |
| HN1      | 0.863812 | 1.81984  | 7.608681 | 9.678824 | 9.61E-16 | 1.07E-13 | 25.39466 |
| PIGG     | 0.40529  | 1.324355 | 7.078462 | 9.654627 | 1.08E-15 | 1.19E-13 | 25.27886 |
| HOMER3   | 0.601473 | 1.517265 | 7.103736 | 9.643305 | 1.14E-15 | 1.24E-13 | 25.22467 |
| DNAJC10  | 0.41057  | 1.329211 | 5.968681 | 9.636397 | 1.18E-15 | 1.27E-13 | 25.19161 |
| ZNF22    | 0.347377 | 1.272245 | 7.713736 | 9.609606 | 1.35E-15 | 1.42E-13 | 25.06339 |
| LIPA     | 0.634232 | 1.552111 | 9.344066 | 9.607265 | 1.36E-15 | 1.42E-13 | 25.05218 |
| NME1     | 0.530275 | 1.444205 | 9.264615 | 9.595744 | 1.44E-15 | 1.49E-13 | 24.99704 |
| DHX15    | 0.321362 | 1.24951  | 9.46022  | 9.586042 | 1.51E-15 | 1.54E-13 | 24.95061 |
| ANKRD6   | 0.36013  | 1.283542 | 5.473956 | 9.574126 | 1.60E-15 | 1.61E-13 | 24.89357 |
| CDH3     | 0.687894 | 1.61093  | 6.705385 | 9.555727 | 1.75E-15 | 1.74E-13 | 24.80551 |
| BAIAP2   | -0.52622 | 0.694371 | 5.75978  | -9.5477  | 1.82E-15 | 1.79E-13 | 24.7671  |
| ALS2CL   | -0.42893 | 0.742814 | 6.696154 | -9.54207 | 1.87E-15 | 1.82E-13 | 24.74015 |
| C2CD2    | 0.485502 | 1.400073 | 6.647692 | 9.539921 | 1.89E-15 | 1.82E-13 | 24.72985 |
| ZZZ3     | 0.534314 | 1.448253 | 7.188352 | 9.532539 | 1.96E-15 | 1.86E-13 | 24.69451 |
| ADAM9    | 0.657739 | 1.577608 | 8.753516 | 9.52569  | 2.03E-15 | 1.91E-13 | 24.66173 |
| UBE2E1   | 0.459618 | 1.375178 | 9.42011  | 9.522085 | 2.06E-15 | 1.92E-13 | 24.64447 |
| PTTG1IP  | 0.356372 | 1.280202 | 11.01297 | 9.513022 | 2.16E-15 | 1.98E-13 | 24.60109 |

|          |          |          |          |   |          |          |          |          |
|----------|----------|----------|----------|---|----------|----------|----------|----------|
| ATP10D   | 0.631285 | 1.548944 |          | 8 | 9.497839 | 2.32E-15 | 2.08E-13 | 24.52842 |
| C1GALT1C | 0.427478 | 1.344881 | 7.677912 |   | 9.497219 | 2.33E-15 | 2.08E-13 | 24.52545 |
| SDCBP    | 0.480459 | 1.395187 | 10.45824 |   | 9.496585 | 2.34E-15 | 2.08E-13 | 24.52241 |
| AMMECR1  | 0.459614 | 1.375173 | 5.77989  |   | 9.481649 | 2.51E-15 | 2.21E-13 | 24.45092 |
| B2M      | 0.414449 | 1.33279  | 12.61516 |   | 9.476061 | 2.58E-15 | 2.25E-13 | 24.42417 |
| APMAP    | 0.339024 | 1.264901 | 8.683736 |   | 9.46434  | 2.74E-15 | 2.36E-13 | 24.36807 |
| CD47     | 0.418802 | 1.336817 | 7.133187 |   | 9.460532 | 2.79E-15 | 2.37E-13 | 24.34984 |
| GCNT3    | 0.987415 | 1.98263  | 6.211978 |   | 9.459412 | 2.80E-15 | 2.37E-13 | 24.34448 |
| TSPAN13  | 0.649676 | 1.568816 | 7.336703 |   | 9.453689 | 2.88E-15 | 2.41E-13 | 24.31709 |
| XRCC5    | 0.347266 | 1.272147 | 9.568681 |   | 9.444788 | 3.01E-15 | 2.49E-13 | 24.27448 |
| CKLF     | 1.03557  | 2.049923 | 6.742747 |   | 9.439864 | 3.08E-15 | 2.53E-13 | 24.25091 |
| PJA1     | 0.39558  | 1.315471 | 8.076703 |   | 9.401791 | 3.71E-15 | 3.02E-13 | 24.06867 |
| PTPRK    | 0.398604 | 1.318232 | 9.164286 |   | 9.384317 | 4.04E-15 | 3.25E-13 | 23.98503 |
| DEK      | 0.381314 | 1.302528 | 9.427692 |   | 9.378898 | 4.15E-15 | 3.29E-13 | 23.95909 |
| GMDS     | 0.352063 | 1.276384 | 6.106923 |   | 9.378334 | 4.16E-15 | 3.29E-13 | 23.95639 |
| PRKACB   | 0.464478 | 1.379818 | 7.631209 |   | 9.344103 | 4.92E-15 | 3.85E-13 | 23.79255 |
| XPNPEP1  | 0.354556 | 1.278592 | 8.34033  |   | 9.327602 | 5.33E-15 | 4.13E-13 | 23.71358 |
| SPON2    | 1.20171  | 2.300122 | 7.441209 |   | 9.323716 | 5.43E-15 | 4.17E-13 | 23.69498 |
| PIGR     | 0.760077 | 1.693581 | 8.189341 |   | 9.315448 | 5.66E-15 | 4.31E-13 | 23.65541 |
| VAMP2    | -0.31311 | 0.804904 | 6.165165 |   | -9.3111  | 5.78E-15 | 4.34E-13 | 23.63462 |
| YARS2    | 0.368444 | 1.29096  | 6.922198 |   | 9.310104 | 5.81E-15 | 4.34E-13 | 23.62983 |
| CDH6     | 1.062227 | 2.088152 | 7.115495 |   | 9.290199 | 6.40E-15 | 4.71E-13 | 23.53457 |
| ARHGEF40 | 0.411145 | 1.329741 | 6.484835 |   | 9.289741 | 6.41E-15 | 4.71E-13 | 23.53238 |
| TGFBR3   | -0.7647  | 0.588578 | 8.430549 |   | -9.26449 | 7.25E-15 | 5.27E-13 | 23.41153 |
| CSTB     | 0.727696 | 1.655992 | 10.99615 |   | 9.262994 | 7.30E-15 | 5.27E-13 | 23.40438 |
| C1RL     | 0.383469 | 1.304474 | 4.865714 |   | 9.261703 | 7.35E-15 | 5.27E-13 | 23.3982  |
| ADAM10   | 0.478715 | 1.393502 | 7.258901 |   | 9.240096 | 8.17E-15 | 5.78E-13 | 23.29481 |
| H2AFY    | 0.344676 | 1.269866 | 8.510879 |   | 9.239198 | 8.20E-15 | 5.78E-13 | 23.29051 |
| B4GALT5  | 0.755633 | 1.688372 | 8.297143 |   | 9.226796 | 8.71E-15 | 6.09E-13 | 23.23117 |
| HSP90B1  | 0.600367 | 1.516102 | 9.833407 |   | 9.221922 | 8.92E-15 | 6.18E-13 | 23.20785 |
| MGAT4B   | 0.589449 | 1.504672 | 7.836703 |   | 9.209175 | 9.50E-15 | 6.53E-13 | 23.14685 |
| ANXA4    | 0.509092 | 1.423154 | 10.69088 |   | 9.2075   | 9.57E-15 | 6.53E-13 | 23.13884 |
| RAB32    | 0.429947 | 1.347184 | 8.09022  |   | 9.193815 | 1.02E-14 | 6.92E-13 | 23.07336 |
| GYPA     | -0.31688 | 0.802802 | 4.503516 |   | -9.18507 | 1.07E-14 | 7.17E-13 | 23.03153 |
| RUFY1    | 0.281657 | 1.21559  | 8.253846 |   | 9.157594 | 1.22E-14 | 8.13E-13 | 22.90008 |
| IL10RB   | 0.479    | 1.393777 | 5.321868 |   | 9.144338 | 1.30E-14 | 8.59E-13 | 22.83667 |
| MTMR2    | 0.325324 | 1.252946 | 6.57044  |   | 9.143105 | 1.31E-14 | 8.59E-13 | 22.83077 |
| HSBP1    | 0.282237 | 1.216079 | 9.57022  |   | 9.137769 | 1.34E-14 | 8.75E-13 | 22.80525 |
| TTC39A   | 1.285797 | 2.438167 | 6.536703 |   | 9.125103 | 1.43E-14 | 9.23E-13 | 22.74466 |
| TNFSF10  | 0.914372 | 1.884748 | 9.838901 |   | 9.122541 | 1.45E-14 | 9.28E-13 | 22.73241 |
| MFAP1    | 0.336048 | 1.262294 | 8.338352 |   | 9.116553 | 1.49E-14 | 9.40E-13 | 22.70377 |
| TPD52L1  | 0.603986 | 1.51991  | 8.098022 |   | 9.115519 | 1.50E-14 | 9.40E-13 | 22.69882 |
| SPP1     | 0.491193 | 1.405607 | 12.76659 |   | 9.115217 | 1.50E-14 | 9.40E-13 | 22.69738 |
| CD83     | -0.76089 | 0.590133 | 7.853736 |   | -9.11105 | 1.53E-14 | 9.52E-13 | 22.67744 |
| COQ2     | 0.434551 | 1.35149  | 6.19967  |   | 9.109391 | 1.54E-14 | 9.53E-13 | 22.66951 |
| SEL1L3   | 0.80143  | 1.742828 | 6.990659 |   | 9.085824 | 1.73E-14 | 1.06E-12 | 22.5568  |
| PRDX4    | 0.499966 | 1.41418  | 9.275714 |   | 9.083086 | 1.76E-14 | 1.07E-12 | 22.54371 |

|          |          |          |          |          |          |          |          |
|----------|----------|----------|----------|----------|----------|----------|----------|
| NUP37    | 0.410986 | 1.329594 | 7.667582 | 9.080684 | 1.78E-14 | 1.07E-12 | 22.53222 |
| MYO6     | 0.347976 | 1.272774 | 8.350989 | 9.070374 | 1.87E-14 | 1.12E-12 | 22.48292 |
| GMFB     | 0.477874 | 1.39269  | 8.220659 | 9.049327 | 2.07E-14 | 1.23E-12 | 22.38228 |
| CXADR    | 0.773246 | 1.709111 | 7.298462 | 9.045514 | 2.11E-14 | 1.25E-12 | 22.36405 |
| ANXA5    | 0.48658  | 1.401119 | 9.856703 | 9.040936 | 2.16E-14 | 1.27E-12 | 22.34216 |
| NECAP2   | 0.423865 | 1.341516 | 7.413516 | 9.03863  | 2.18E-14 | 1.27E-12 | 22.33114 |
| ZFP36    | -1.04082 | 0.486051 | 8.318352 | -9.03014 | 2.27E-14 | 1.31E-12 | 22.29054 |
| HAGH     | -0.50079 | 0.706719 | 9.266703 | -9.02961 | 2.28E-14 | 1.31E-12 | 22.28799 |
| PAFAH1B3 | 0.440449 | 1.357027 | 7.088022 | 9.007853 | 2.53E-14 | 1.45E-12 | 22.184   |
| ACBD4    | -0.35437 | 0.782213 | 6.688242 | -8.98119 | 2.88E-14 | 1.64E-12 | 22.05657 |
| MNS1     | 0.840271 | 1.790386 | 5.537692 | 8.966041 | 3.11E-14 | 1.75E-12 | 21.98415 |
| TPGS2    | 0.395087 | 1.315022 | 6.904286 | 8.96277  | 3.16E-14 | 1.77E-12 | 21.96852 |
| DPYS     | -0.66575 | 0.630361 | 10.59209 | -8.96005 | 3.20E-14 | 1.78E-12 | 21.95554 |
| STRA6    | -0.50015 | 0.707033 | 6.355934 | -8.95762 | 3.24E-14 | 1.78E-12 | 21.9439  |
| G6PC     | -1.50601 | 0.352083 | 7.744615 | -8.95736 | 3.24E-14 | 1.78E-12 | 21.94264 |
| SMARCA5  | 0.318314 | 1.246873 | 6.351538 | 8.950388 | 3.35E-14 | 1.83E-12 | 21.90935 |
| PSMB10   | 0.876473 | 1.835882 | 6.664725 | 8.94136  | 3.50E-14 | 1.90E-12 | 21.86621 |
| IQGAP1   | 0.418928 | 1.336933 | 7.808901 | 8.924862 | 3.79E-14 | 2.04E-12 | 21.78738 |
| CDC123   | 0.313763 | 1.242946 | 8.624505 | 8.913849 | 4.00E-14 | 2.14E-12 | 21.73476 |
| LHPP     | -0.46232 | 0.725819 | 7.547033 | -8.91298 | 4.02E-14 | 2.14E-12 | 21.73064 |
| NR4A1    | -1.16156 | 0.44703  | 6.125604 | -8.89654 | 4.36E-14 | 2.30E-12 | 21.65209 |
| ACTR3    | 0.410758 | 1.329385 | 8.517253 | 8.891219 | 4.47E-14 | 2.35E-12 | 21.62666 |
| TRIM37   | 0.364295 | 1.287252 | 7.623407 | 8.870738 | 4.94E-14 | 2.57E-12 | 21.52884 |
| SRP54    | 0.31258  | 1.241926 | 8.580659 | 8.869808 | 4.96E-14 | 2.57E-12 | 21.5244  |
| CLCN3    | 0.353111 | 1.277312 | 7.694615 | 8.859914 | 5.21E-14 | 2.68E-12 | 21.47715 |
| HDAC6    | -0.42076 | 0.747029 | 8.087582 | -8.85363 | 5.37E-14 | 2.74E-12 | 21.44715 |
| PARP12   | 0.66257  | 1.5829   | 6.603297 | 8.852834 | 5.39E-14 | 2.74E-12 | 21.44334 |
| TFEB     | -0.26734 | 0.830848 | 6.537363 | -8.84673 | 5.55E-14 | 2.81E-12 | 21.41421 |
| GADD45A  | -0.76478 | 0.588544 | 10.46681 | -8.83025 | 6.01E-14 | 3.03E-12 | 21.33551 |
| FOXO4    | -0.30268 | 0.810744 | 5.70967  | -8.82394 | 6.20E-14 | 3.10E-12 | 21.30537 |
| ZNF331   | -0.8163  | 0.567897 | 6.612857 | -8.81378 | 6.52E-14 | 3.24E-12 | 21.25686 |
| CAP1     | 0.371749 | 1.29392  | 10.33253 | 8.807429 | 6.72E-14 | 3.32E-12 | 21.22656 |
| VPS35    | 0.351377 | 1.275778 | 10.04571 | 8.796875 | 7.08E-14 | 3.48E-12 | 21.17618 |
| AMPH     | -0.35725 | 0.780653 | 4.777253 | -8.79152 | 7.26E-14 | 3.53E-12 | 21.15062 |
| MME      | -0.90322 | 0.534691 | 10.35835 | -8.79115 | 7.27E-14 | 3.53E-12 | 21.14887 |
| COPB2    | 0.243401 | 1.18378  | 9.373407 | 8.790018 | 7.32E-14 | 3.53E-12 | 21.14346 |
| MFSD5    | 0.337319 | 1.263406 | 7.196154 | 8.777587 | 7.77E-14 | 3.73E-12 | 21.08413 |
| CAP2     | 0.524773 | 1.438707 | 6.994286 | 8.771948 | 7.99E-14 | 3.81E-12 | 21.05722 |
| CNNM2    | -0.34598 | 0.786776 | 6.65     | -8.75135 | 8.83E-14 | 4.19E-12 | 20.95893 |
| LPCAT3   | 0.444894 | 1.361214 | 6.86022  | 8.749615 | 8.90E-14 | 4.21E-12 | 20.95066 |
| NNMT     | 1.951005 | 3.866437 | 7.4      | 8.742414 | 9.22E-14 | 4.29E-12 | 20.91631 |
| CYFIP1   | 0.375179 | 1.297    | 9.948571 | 8.742291 | 9.23E-14 | 4.29E-12 | 20.91572 |
| CCT6A    | 0.408    | 1.326845 | 8.031758 | 8.742021 | 9.24E-14 | 4.29E-12 | 20.91443 |
| DYRK2    | 0.410159 | 1.328833 | 5.17     | 8.739495 | 9.35E-14 | 4.32E-12 | 20.90239 |
| SGCE     | 0.418889 | 1.336898 | 8.197143 | 8.736432 | 9.49E-14 | 4.36E-12 | 20.88777 |
| MGAT2    | 0.30585  | 1.236147 | 6.404505 | 8.728471 | 9.87E-14 | 4.51E-12 | 20.8498  |
| RNF34    | 0.369014 | 1.29147  | 7.558132 | 8.726327 | 9.97E-14 | 4.53E-12 | 20.83957 |

|          |          |          |          |          |          |          |          |
|----------|----------|----------|----------|----------|----------|----------|----------|
| EXOC1    | 0.397647 | 1.317358 | 8.100769 | 8.718439 | 1.04E-13 | 4.68E-12 | 20.80195 |
| RBM7     | 0.41999  | 1.337919 | 7.397253 | 8.711141 | 1.07E-13 | 4.83E-12 | 20.76714 |
| HLA-A    | 0.632502 | 1.550252 | 12.23538 | 8.698369 | 1.14E-13 | 5.11E-12 | 20.70623 |
| EAF2     | -0.67551 | 0.62611  | 8.847912 | -8.69622 | 1.15E-13 | 5.14E-12 | 20.69598 |
| TMED10   | 0.268179 | 1.204287 | 9.580659 | 8.692138 | 1.18E-13 | 5.20E-12 | 20.67652 |
| RPN2     | 0.237319 | 1.1788   | 10.4167  | 8.69135  | 1.18E-13 | 5.20E-12 | 20.67276 |
| PRODH2   | -0.8707  | 0.546883 | 10.94813 | -8.67954 | 1.25E-13 | 5.48E-12 | 20.61645 |
| ANXA11   | 0.35928  | 1.282786 | 7.055275 | 8.676641 | 1.27E-13 | 5.52E-12 | 20.60263 |
| C1S      | 1.189527 | 2.280779 | 7.426923 | 8.676158 | 1.27E-13 | 5.52E-12 | 20.60033 |
| VCAM1    | 1.022628 | 2.031616 | 10.56396 | 8.665029 | 1.34E-13 | 5.77E-12 | 20.54728 |
| APOC3    | -1.53331 | 0.345484 | 6.462857 | -8.66477 | 1.34E-13 | 5.77E-12 | 20.54603 |
| CD99     | 0.518947 | 1.432909 | 8.569231 | 8.656469 | 1.40E-13 | 5.98E-12 | 20.50647 |
| SMAP1    | 0.370454 | 1.29276  | 8.173626 | 8.65337  | 1.42E-13 | 6.04E-12 | 20.4917  |
| SLC39A6  | 0.569135 | 1.483634 | 7.642527 | 8.643663 | 1.49E-13 | 6.30E-12 | 20.44544 |
| ITGB6    | 1.55529  | 2.938928 | 5.557143 | 8.632611 | 1.57E-13 | 6.60E-12 | 20.39277 |
| LEPROT   | 0.430995 | 1.348163 | 10.13791 | 8.631393 | 1.58E-13 | 6.60E-12 | 20.38697 |
| CYP3A4   | -0.47905 | 0.717451 | 6.605934 | -8.63104 | 1.58E-13 | 6.60E-12 | 20.38531 |
| SLC19A2  | -0.7018  | 0.614804 | 6.861868 | -8.62563 | 1.63E-13 | 6.74E-12 | 20.35949 |
| FAM13B   | 0.467686 | 1.38289  | 7.347143 | 8.623432 | 1.64E-13 | 6.78E-12 | 20.34903 |
| FAM98A   | 0.429696 | 1.346949 | 8.638791 | 8.620466 | 1.67E-13 | 6.84E-12 | 20.3349  |
| GFPT1    | 0.394498 | 1.314485 | 7.427473 | 8.610769 | 1.75E-13 | 7.12E-12 | 20.2887  |
| TMEM50A  | 0.327585 | 1.254911 | 8.923297 | 8.610428 | 1.75E-13 | 7.12E-12 | 20.28708 |
| BLNK     | 0.642478 | 1.561008 | 7.479231 | 8.593983 | 1.90E-13 | 7.67E-12 | 20.20874 |
| SH3BGRL3 | 0.499454 | 1.413679 | 8.262418 | 8.586266 | 1.97E-13 | 7.93E-12 | 20.17199 |
| VEGFA    | -0.45896 | 0.727512 | 7.25     | -8.58215 | 2.01E-13 | 8.05E-12 | 20.1524  |
| DENR     | 0.370377 | 1.29269  | 8.71011  | 8.580833 | 2.02E-13 | 8.06E-12 | 20.14611 |
| DCTD     | 0.318879 | 1.247361 | 7.977253 | 8.574092 | 2.09E-13 | 8.29E-12 | 20.11401 |
| ECT2     | 0.500039 | 1.414251 | 4.299011 | 8.5609   | 2.23E-13 | 8.80E-12 | 20.0512  |
| MAPK13   | 0.425589 | 1.343121 | 6.141978 | 8.555843 | 2.28E-13 | 8.98E-12 | 20.02712 |
| PFN1     | 0.600193 | 1.51592  | 8.745495 | 8.547905 | 2.37E-13 | 9.28E-12 | 19.98933 |
| RSU1     | 0.399527 | 1.319075 | 7.346264 | 8.54709  | 2.38E-13 | 9.28E-12 | 19.98545 |
| ITM2C    | 0.629213 | 1.546721 | 8.845714 | 8.536315 | 2.51E-13 | 9.73E-12 | 19.93416 |
| HLA-DMA  | 0.928826 | 1.903726 | 8.306484 | 8.532162 | 2.56E-13 | 9.88E-12 | 19.91439 |
| METTL21B | -0.66796 | 0.629395 | 7.651429 | -8.52666 | 2.63E-13 | 1.01E-11 | 19.88819 |
| BAX      | 0.560406 | 1.474684 | 6.315385 | 8.524252 | 2.66E-13 | 1.02E-11 | 19.87675 |
| TNS2     | -0.41707 | 0.748943 | 6.525495 | -8.51398 | 2.80E-13 | 1.07E-11 | 19.82786 |
| UBE2D2   | 0.215918 | 1.161443 | 7.493077 | 8.510733 | 2.84E-13 | 1.08E-11 | 19.81241 |
| RASA1    | 0.292807 | 1.225021 | 7.331099 | 8.505846 | 2.91E-13 | 1.10E-11 | 19.78916 |
| GUCA2A   | -0.32563 | 0.797951 | 5.595714 | -8.50499 | 2.92E-13 | 1.10E-11 | 19.78507 |
| TRAM1    | 0.440686 | 1.35725  | 9.948791 | 8.486538 | 3.20E-13 | 1.20E-11 | 19.69731 |
| UBE2K    | 0.292005 | 1.22434  | 7.774615 | 8.467326 | 3.51E-13 | 1.31E-11 | 19.60593 |
| EIF4G3   | 0.326029 | 1.253558 | 5.592527 | 8.464464 | 3.56E-13 | 1.32E-11 | 19.59232 |
| IFI30    | 0.605106 | 1.521091 | 9.609011 | 8.463578 | 3.57E-13 | 1.32E-11 | 19.58811 |
| USP3     | 0.307502 | 1.237563 | 7.75967  | 8.462118 | 3.60E-13 | 1.32E-11 | 19.58117 |
| PCBP2    | -0.42393 | 0.745393 | 9.403626 | -8.45739 | 3.68E-13 | 1.35E-11 | 19.55868 |
| KLHL3    | -0.66883 | 0.629016 | 7.561868 | -8.44775 | 3.86E-13 | 1.41E-11 | 19.51286 |
| ANXA3    | 0.875812 | 1.83504  | 6.654615 | 8.443368 | 3.94E-13 | 1.43E-11 | 19.49202 |



|         |          |          |          |          |          |          |          |
|---------|----------|----------|----------|----------|----------|----------|----------|
| NARS    | 0.249179 | 1.18853  | 11.15626 | 8.439796 | 4.01E-13 | 1.45E-11 | 19.47504 |
| CISH    | -0.69743 | 0.616668 | 8.230549 | -8.43494 | 4.10E-13 | 1.47E-11 | 19.45195 |
| STAT1   | 0.761203 | 1.694903 | 7.160549 | 8.434631 | 4.11E-13 | 1.47E-11 | 19.45049 |
| C4orf27 | 0.330406 | 1.257367 | 7.831648 | 8.433713 | 4.13E-13 | 1.47E-11 | 19.44613 |
| CAPRIN1 | 0.309121 | 1.238952 | 8.023297 | 8.428382 | 4.24E-13 | 1.50E-11 | 19.42079 |
| PER1    | -0.56124 | 0.677721 | 7.436813 | -8.42393 | 4.33E-13 | 1.53E-11 | 19.39962 |
| HNRNPR  | 0.270952 | 1.206604 | 8.366813 | 8.408128 | 4.67E-13 | 1.65E-11 | 19.32454 |
| PSMB9   | 1.014729 | 2.020524 | 6.884615 | 8.405057 | 4.74E-13 | 1.66E-11 | 19.30994 |
| ZNF207  | 0.292729 | 1.224956 | 8.937582 | 8.39792  | 4.91E-13 | 1.71E-11 | 19.27604 |
| GALNT3  | 0.613768 | 1.530251 | 6.053077 | 8.397683 | 4.92E-13 | 1.71E-11 | 19.27491 |
| MICU1   | -0.51882 | 0.697944 | 8.816703 | -8.39041 | 5.09E-13 | 1.76E-11 | 19.24034 |
| FLRT3   | 0.841797 | 1.792281 | 8.447143 | 8.389614 | 5.11E-13 | 1.76E-11 | 19.23658 |
| CTCF    | 0.273527 | 1.208759 | 7.673956 | 8.388924 | 5.13E-13 | 1.76E-11 | 19.2333  |
| DPAGT1  | 0.304193 | 1.234728 | 7.299121 | 8.384118 | 5.25E-13 | 1.80E-11 | 19.21047 |
| DNMT1   | 0.499754 | 1.413972 | 6.346044 | 8.373946 | 5.51E-13 | 1.88E-11 | 19.16216 |
| CD58    | 0.495005 | 1.409325 | 7.17     | 8.371543 | 5.58E-13 | 1.89E-11 | 19.15075 |
| GNAI1   | 0.805126 | 1.747298 | 6.258791 | 8.369982 | 5.62E-13 | 1.90E-11 | 19.14334 |
| AVPI1   | -0.45848 | 0.727753 | 7.071758 | -8.36526 | 5.75E-13 | 1.93E-11 | 19.1209  |
| FKBP8   | -0.30067 | 0.811874 | 6.211099 | -8.36474 | 5.77E-13 | 1.93E-11 | 19.11846 |
| KLK1    | -1.72705 | 0.302069 | 8.168791 | -8.36325 | 5.81E-13 | 1.94E-11 | 19.11138 |
| PSENN   | 0.363768 | 1.286782 | 8.009451 | 8.362392 | 5.83E-13 | 1.94E-11 | 19.1073  |
| VPS4B   | 0.345058 | 1.270202 | 7.768242 | 8.36     | 5.90E-13 | 1.96E-11 | 19.09594 |
| BLVRA   | 0.261164 | 1.198445 | 8.841538 | 8.347105 | 6.28E-13 | 2.07E-11 | 19.03472 |
| AGPS    | 0.567203 | 1.481648 | 7.044615 | 8.347024 | 6.28E-13 | 2.07E-11 | 19.03434 |
| DTYMK   | 0.387551 | 1.308171 | 6.621429 | 8.34294  | 6.41E-13 | 2.10E-11 | 19.01495 |
| PNMA1   | 0.357884 | 1.281545 | 8.501758 | 8.333111 | 6.72E-13 | 2.19E-11 | 18.9683  |
| PMS1    | 0.359498 | 1.282979 | 6.705165 | 8.331531 | 6.77E-13 | 2.20E-11 | 18.9608  |
| FZD6    | 0.529425 | 1.443354 | 7.095934 | 8.327462 | 6.91E-13 | 2.24E-11 | 18.94149 |
| ADGRA3  | 0.280155 | 1.214325 | 5.995495 | 8.322847 | 7.06E-13 | 2.28E-11 | 18.91959 |
| FNTA    | 0.336855 | 1.263    | 8.135055 | 8.321371 | 7.11E-13 | 2.29E-11 | 18.91259 |
| UBQLN2  | 0.48686  | 1.401391 | 7.259451 | 8.314879 | 7.34E-13 | 2.35E-11 | 18.88178 |
| GLB1    | 0.363729 | 1.286748 | 8.937692 | 8.313157 | 7.40E-13 | 2.36E-11 | 18.87361 |
| BCAP29  | 0.316966 | 1.245708 | 5.84022  | 8.311751 | 7.45E-13 | 2.36E-11 | 18.86694 |
| DSE     | 0.763092 | 1.697124 | 6.956484 | 8.311604 | 7.46E-13 | 2.36E-11 | 18.86624 |
| AKR1B1  | 0.624802 | 1.541999 | 9.615055 | 8.306507 | 7.64E-13 | 2.41E-11 | 18.84206 |
| FOSB    | -1.71604 | 0.304383 | 5.89967  | -8.30468 | 7.71E-13 | 2.42E-11 | 18.83341 |
| ASCC3   | 0.331541 | 1.258357 | 5.393297 | 8.302094 | 7.81E-13 | 2.44E-11 | 18.82113 |
| PHF11   | 0.410063 | 1.328744 | 8.485604 | 8.294843 | 8.09E-13 | 2.52E-11 | 18.78673 |
| SKAP2   | 0.351812 | 1.276162 | 7.315495 | 8.289234 | 8.31E-13 | 2.58E-11 | 18.76013 |
| ORMDL2  | 0.392609 | 1.312765 | 8.551538 | 8.280057 | 8.69E-13 | 2.69E-11 | 18.71661 |
| CORO1C  | 0.470976 | 1.386047 | 8.906813 | 8.278814 | 8.74E-13 | 2.70E-11 | 18.71071 |
| DUSP1   | -1.24386 | 0.422243 | 7.591429 | -8.2708  | 9.08E-13 | 2.79E-11 | 18.67272 |
| CRY2    | -0.44843 | 0.732837 | 7.038681 | -8.2661  | 9.29E-13 | 2.85E-11 | 18.65046 |
| EOGT    | 0.381507 | 1.302702 | 4.326484 | 8.252741 | 9.91E-13 | 3.03E-11 | 18.58711 |
| HLA-DRA | 0.925928 | 1.899905 | 9.934615 | 8.25005  | 1.00E-12 | 3.05E-11 | 18.57435 |
| MFN1    | 0.306787 | 1.23695  | 6.157143 | 8.243151 | 1.04E-12 | 3.15E-11 | 18.54166 |
| CPVL    | 0.706169 | 1.631466 | 8.346813 | 8.239235 | 1.06E-12 | 3.19E-11 | 18.5231  |

|          |          |          |          |          |          |          |          |
|----------|----------|----------|----------|----------|----------|----------|----------|
| TSPYL2   | -0.4507  | 0.73169  | 6.815824 | -8.23345 | 1.09E-12 | 3.27E-11 | 18.49568 |
| INHA     | -0.26654 | 0.831313 | 4.564066 | -8.23192 | 1.10E-12 | 3.29E-11 | 18.48843 |
| ZBED5    | 0.367329 | 1.289962 | 8.391429 | 8.225989 | 1.13E-12 | 3.37E-11 | 18.46034 |
| GTPBP4   | 0.294517 | 1.226474 | 6.668901 | 8.224627 | 1.14E-12 | 3.38E-11 | 18.45388 |
| NOP10    | 0.294575 | 1.226524 | 10.40154 | 8.221229 | 1.15E-12 | 3.42E-11 | 18.43779 |
| WDR1     | 0.305459 | 1.235812 | 9.056703 | 8.214096 | 1.19E-12 | 3.53E-11 | 18.404   |
| FAM208B  | 0.347353 | 1.272224 | 6.022637 | 8.212372 | 1.20E-12 | 3.55E-11 | 18.39583 |
| LSM1     | 0.250179 | 1.189354 | 9.171758 | 8.211117 | 1.21E-12 | 3.56E-11 | 18.38989 |
| IL7      | 0.480517 | 1.395243 | 3.920879 | 8.210146 | 1.22E-12 | 3.56E-11 | 18.38529 |
| RARRES3  | 0.973377 | 1.963431 | 9.273297 | 8.207379 | 1.23E-12 | 3.58E-11 | 18.37218 |
| COL3A1   | 1.553043 | 2.934355 | 7.344945 | 8.207366 | 1.23E-12 | 3.58E-11 | 18.37213 |
| CLCN6    | -0.35896 | 0.779728 | 6.669451 | -8.20678 | 1.24E-12 | 3.58E-11 | 18.36935 |
| TES      | 0.548657 | 1.462723 | 6.750879 | 8.204664 | 1.25E-12 | 3.61E-11 | 18.35933 |
| MVP      | 0.515754 | 1.429741 | 8.663956 | 8.19989  | 1.28E-12 | 3.68E-11 | 18.33672 |
| HPGD     | -0.84986 | 0.55484  | 8.106264 | -8.19475 | 1.31E-12 | 3.76E-11 | 18.3124  |
| ARMCX3   | 0.340681 | 1.266354 | 7.769121 | 8.192603 | 1.33E-12 | 3.79E-11 | 18.30222 |
| CCDC90B  | 0.300614 | 1.231668 | 7.416264 | 8.185362 | 1.37E-12 | 3.91E-11 | 18.26793 |
| NSF      | 0.278493 | 1.212927 | 8.33989  | 8.183053 | 1.39E-12 | 3.94E-11 | 18.257   |
| DYNLL1   | 0.330271 | 1.257249 | 11.70549 | 8.181477 | 1.40E-12 | 3.95E-11 | 18.24954 |
| TARS     | 0.336053 | 1.262299 | 8.148571 | 8.167764 | 1.49E-12 | 4.21E-11 | 18.18464 |
| NUDT9    | 0.320111 | 1.248427 | 8.373297 | 8.166052 | 1.51E-12 | 4.23E-11 | 18.17653 |
| CD2AP    | 0.355159 | 1.279127 | 7.617802 | 8.162182 | 1.54E-12 | 4.30E-11 | 18.15822 |
| ERGIC2   | 0.390604 | 1.310942 | 7.81033  | 8.15718  | 1.57E-12 | 4.39E-11 | 18.13455 |
| ARPC1B   | 0.841338 | 1.791711 | 8.326264 | 8.155417 | 1.59E-12 | 4.41E-11 | 18.12621 |
| NRP1     | 0.743126 | 1.673798 | 7.038132 | 8.153454 | 1.60E-12 | 4.44E-11 | 18.11692 |
| CSNK1A1  | 0.258831 | 1.196509 | 9.035385 | 8.15148  | 1.62E-12 | 4.46E-11 | 18.10758 |
| TLR3     | 0.545845 | 1.459876 | 6.312967 | 8.151201 | 1.62E-12 | 4.46E-11 | 18.10626 |
| KLF9     | -0.67093 | 0.628103 | 6.926484 | -8.14911 | 1.64E-12 | 4.49E-11 | 18.09636 |
| XPNPEP2  | -0.8441  | 0.557058 | 9.408022 | -8.14099 | 1.70E-12 | 4.65E-11 | 18.05794 |
| PAK2     | 0.329111 | 1.256239 | 6.962747 | 8.137748 | 1.73E-12 | 4.71E-11 | 18.04262 |
| PYCARD   | 0.837488 | 1.786936 | 5.281099 | 8.136659 | 1.74E-12 | 4.72E-11 | 18.03748 |
| ATF7IP   | 0.376343 | 1.298047 | 7.121538 | 8.133367 | 1.76E-12 | 4.78E-11 | 18.0219  |
| GINS1    | 0.545309 | 1.459333 | 5.518571 | 8.130233 | 1.79E-12 | 4.84E-11 | 18.00708 |
| HLA-F    | 0.71542  | 1.641961 | 9.717692 | 8.127222 | 1.82E-12 | 4.88E-11 | 17.99284 |
| GALK1    | -0.49734 | 0.70841  | 6.733626 | -8.12698 | 1.82E-12 | 4.88E-11 | 17.99172 |
| TRIOBP   | 0.324763 | 1.252459 | 7.864945 | 8.125343 | 1.83E-12 | 4.91E-11 | 17.98396 |
| HMGN3    | 0.35013  | 1.274676 | 10.88901 | 8.11697  | 1.91E-12 | 5.08E-11 | 17.94436 |
| DROSHA   | 0.274227 | 1.209346 | 7.145824 | 8.116875 | 1.91E-12 | 5.08E-11 | 17.94392 |
| AFM      | -1.16512 | 0.445928 | 8.073626 | -8.11627 | 1.92E-12 | 5.08E-11 | 17.94106 |
| FANCF    | 0.319396 | 1.247808 | 6.480769 | 8.111732 | 1.96E-12 | 5.17E-11 | 17.9196  |
| TNC      | 1.059169 | 2.083731 | 5.866374 | 8.107596 | 2.00E-12 | 5.26E-11 | 17.90005 |
| GUCY1B3  | 0.731913 | 1.66084  | 6.248022 | 8.105062 | 2.02E-12 | 5.31E-11 | 17.88807 |
| ARPC5    | 0.4497   | 1.365757 | 9.248901 | 8.102587 | 2.05E-12 | 5.35E-11 | 17.87637 |
| C17orf62 | 0.389821 | 1.310231 | 5.924725 | 8.102189 | 2.05E-12 | 5.35E-11 | 17.87449 |
| RBPMS    | 0.43128  | 1.34843  | 7.870879 | 8.100128 | 2.07E-12 | 5.39E-11 | 17.86475 |
| CALM2    | 0.255527 | 1.193771 | 12.65505 | 8.099368 | 2.08E-12 | 5.39E-11 | 17.86116 |
| CD24     | 0.499614 | 1.413835 | 10.63967 | 8.097186 | 2.10E-12 | 5.43E-11 | 17.85085 |

|         |          |          |          |          |          |          |          |
|---------|----------|----------|----------|----------|----------|----------|----------|
| SLC26A6 | -0.45587 | 0.729068 | 5.80022  | -8.09111 | 2.16E-12 | 5.58E-11 | 17.82214 |
| CLCC1   | 0.231208 | 1.173817 | 5.078681 | 8.090381 | 2.17E-12 | 5.58E-11 | 17.81869 |
| MCTS1   | 0.291633 | 1.224025 | 8.047692 | 8.086009 | 2.22E-12 | 5.68E-11 | 17.79803 |
| KDELC1  | 0.62813  | 1.545561 | 5.166484 | 8.083078 | 2.25E-12 | 5.74E-11 | 17.78418 |
| CDHR5   | -0.6634  | 0.63139  | 7.029121 | -8.08009 | 2.28E-12 | 5.81E-11 | 17.77006 |
| TRIM38  | 0.526169 | 1.4401   | 7.757802 | 8.079019 | 2.29E-12 | 5.82E-11 | 17.765   |
| TM9SF1  | 0.302614 | 1.233377 | 7.997253 | 8.077501 | 2.31E-12 | 5.85E-11 | 17.75783 |
| HNF4A   | -0.29843 | 0.813134 | 6.302857 | -8.06919 | 2.40E-12 | 6.07E-11 | 17.71858 |
| ARL6IP5 | 0.56256  | 1.476888 | 9.683407 | 8.067977 | 2.42E-12 | 6.08E-11 | 17.71284 |
| RGS16   | -0.28089 | 0.823081 | 5.130879 | -8.06198 | 2.49E-12 | 6.24E-11 | 17.68449 |
| CNOT6   | 0.35557  | 1.279491 | 7.116484 | 8.056909 | 2.55E-12 | 6.38E-11 | 17.66057 |
| NOL11   | 0.33172  | 1.258513 | 8.281429 | 8.054786 | 2.58E-12 | 6.43E-11 | 17.65054 |
| TNNT2   | -0.58044 | 0.668758 | 5.662967 | -8.05298 | 2.60E-12 | 6.46E-11 | 17.642   |
| GSPT2   | 0.498372 | 1.412619 | 6.753187 | 8.049146 | 2.65E-12 | 6.56E-11 | 17.62391 |
| DRP2    | -0.2483  | 0.841888 | 4.953736 | -8.04598 | 2.69E-12 | 6.65E-11 | 17.60898 |
| DDN     | -0.52518 | 0.694871 | 7.137033 | -8.03467 | 2.84E-12 | 7.00E-11 | 17.55555 |
| UBE2I   | 0.214106 | 1.159985 | 7.610659 | 8.032322 | 2.87E-12 | 7.06E-11 | 17.54449 |
| C1R     | 0.915101 | 1.885702 | 7.522088 | 8.031467 | 2.88E-12 | 7.07E-11 | 17.54046 |
| ALDH2   | -0.33251 | 0.794152 | 11.47253 | -8.02303 | 3.00E-12 | 7.34E-11 | 17.50066 |
| DRAM1   | 0.405754 | 1.324781 | 8.47956  | 8.015672 | 3.11E-12 | 7.58E-11 | 17.46591 |
| TPBG    | 0.595406 | 1.510898 | 6.927692 | 8.012549 | 3.16E-12 | 7.67E-11 | 17.45118 |
| PANX1   | 0.317135 | 1.245854 | 5.317912 | 8.01104  | 3.18E-12 | 7.71E-11 | 17.44406 |
| TALDO1  | 0.337179 | 1.263284 | 10.21978 | 8.007979 | 3.23E-12 | 7.80E-11 | 17.42962 |
| HMGNA4  | 0.259184 | 1.196801 | 8.621429 | 8.00583  | 3.26E-12 | 7.86E-11 | 17.41948 |
| TSTA3   | 0.378691 | 1.300161 | 7.458352 | 8.002792 | 3.31E-12 | 7.95E-11 | 17.40515 |
| STAM    | 0.387541 | 1.308162 | 7.310989 | 8.001589 | 3.33E-12 | 7.97E-11 | 17.39948 |
| GATM    | -0.47555 | 0.719192 | 12.22505 | -7.99852 | 3.38E-12 | 8.07E-11 | 17.38501 |
| SYDE1   | -0.22073 | 0.858131 | 6.198022 | -7.998   | 3.39E-12 | 8.07E-11 | 17.38254 |
| EIF5B   | 0.231787 | 1.174289 | 7.045055 | 7.989883 | 3.52E-12 | 8.36E-11 | 17.34427 |
| SIRT2   | -0.26876 | 0.830034 | 8.272967 | -7.98406 | 3.62E-12 | 8.58E-11 | 17.31679 |
| KDELR2  | 0.269246 | 1.205178 | 9.249231 | 7.981657 | 3.66E-12 | 8.65E-11 | 17.30549 |
| GSTA1   | -1.18604 | 0.439508 | 11.83176 | -7.98105 | 3.68E-12 | 8.65E-11 | 17.30263 |
| CKAP4   | 0.349971 | 1.274535 | 7.621758 | 7.977234 | 3.74E-12 | 8.78E-11 | 17.28463 |
| NAE1    | 0.414792 | 1.333107 | 8.960769 | 7.976893 | 3.75E-12 | 8.78E-11 | 17.28302 |
| NUP85   | 0.396034 | 1.315885 | 6.167363 | 7.970411 | 3.87E-12 | 9.03E-11 | 17.25247 |
| DNAH3   | -0.23692 | 0.848556 | 5.791538 | -7.96518 | 3.97E-12 | 9.24E-11 | 17.22779 |
| TRIM32  | 0.304768 | 1.23522  | 6.125275 | 7.964042 | 3.99E-12 | 9.26E-11 | 17.22245 |
| RBM22   | 0.22413  | 1.168073 | 7.336703 | 7.95977  | 4.07E-12 | 9.43E-11 | 17.20232 |
| DCP2    | 0.327527 | 1.25486  | 6.240659 | 7.955259 | 4.16E-12 | 9.61E-11 | 17.18106 |
| SLPI    | 1.502116 | 2.832579 | 8.108022 | 7.952103 | 4.22E-12 | 9.73E-11 | 17.16619 |
| PDK2    | -0.4824  | 0.715788 | 7.833626 | -7.94316 | 4.41E-12 | 1.01E-10 | 17.12406 |
| CDH15   | -0.27236 | 0.827965 | 4.769231 | -7.93546 | 4.58E-12 | 1.05E-10 | 17.08779 |
| IRF9    | 0.652184 | 1.571545 | 8.990769 | 7.935066 | 4.58E-12 | 1.05E-10 | 17.08593 |
| PSMD1   | 0.228541 | 1.17165  | 8.697363 | 7.934936 | 4.59E-12 | 1.05E-10 | 17.08532 |
| ANXA2P2 | 0.531966 | 1.445898 | 6.191538 | 7.927954 | 4.74E-12 | 1.08E-10 | 17.05244 |
| PRKD1   | 0.439179 | 1.355832 | 6.76022  | 7.92537  | 4.80E-12 | 1.09E-10 | 17.04027 |
| GNPTAB  | 0.355333 | 1.279281 | 6.565714 | 7.915618 | 5.03E-12 | 1.14E-10 | 16.99435 |

|           |          |          |          |          |          |          |          |
|-----------|----------|----------|----------|----------|----------|----------|----------|
| TGFBI     | 0.942077 | 1.921293 | 7.539341 | 7.91488  | 5.05E-12 | 1.14E-10 | 16.99088 |
| F2RL1     | 0.400058 | 1.319561 | 7.98044  | 7.911315 | 5.14E-12 | 1.16E-10 | 16.9741  |
| LYZ       | 1.904097 | 3.742745 | 6.415934 | 7.909615 | 5.18E-12 | 1.16E-10 | 16.96609 |
| C3        | 1.566812 | 2.962493 | 8.411319 | 7.90756  | 5.23E-12 | 1.17E-10 | 16.95642 |
| MIOS      | 0.280918 | 1.214968 | 6.88022  | 7.903963 | 5.32E-12 | 1.19E-10 | 16.93949 |
| TP53TG5   | -0.36571 | 0.776087 | 5.722198 | -7.8905  | 5.68E-12 | 1.26E-10 | 16.87612 |
| TAP1      | 0.587304 | 1.502437 | 7.159121 | 7.88788  | 5.75E-12 | 1.28E-10 | 16.86381 |
| KIDINS220 | 0.288077 | 1.221012 | 7.325934 | 7.884192 | 5.85E-12 | 1.30E-10 | 16.84646 |
| PLS1      | 0.363536 | 1.286576 | 8.848901 | 7.883353 | 5.88E-12 | 1.30E-10 | 16.84251 |
| GPC4      | 0.569531 | 1.484041 | 7.530549 | 7.878478 | 6.02E-12 | 1.32E-10 | 16.81958 |
| PXDN      | 0.72213  | 1.649616 | 6.092967 | 7.87686  | 6.06E-12 | 1.33E-10 | 16.81197 |
| STK38     | 0.411222 | 1.329812 | 7.168352 | 7.876764 | 6.07E-12 | 1.33E-10 | 16.81152 |
| NOL8      | 0.34557  | 1.270653 | 6.851538 | 7.876632 | 6.07E-12 | 1.33E-10 | 16.8109  |
| DYNLT1    | 0.325696 | 1.253269 | 10.89736 | 7.874907 | 6.12E-12 | 1.33E-10 | 16.80278 |
| CASP8     | 0.29815  | 1.229566 | 5.884176 | 7.872022 | 6.21E-12 | 1.35E-10 | 16.78922 |
| GAD1      | -0.28803 | 0.81902  | 4.486264 | -7.87152 | 6.22E-12 | 1.35E-10 | 16.78685 |
| NUP107    | 0.328527 | 1.25573  | 7.606154 | 7.871319 | 6.23E-12 | 1.35E-10 | 16.78591 |
| SMAD1     | 0.403541 | 1.322751 | 7.228901 | 7.864208 | 6.44E-12 | 1.39E-10 | 16.75247 |
| HAAO      | -0.46478 | 0.724583 | 7.745165 | -7.85695 | 6.67E-12 | 1.43E-10 | 16.71834 |
| RFC4      | 0.401696 | 1.32106  | 6.654945 | 7.856745 | 6.68E-12 | 1.43E-10 | 16.71738 |
| NR4A3     | -0.59647 | 0.661369 | 4.513736 | -7.83422 | 7.44E-12 | 1.59E-10 | 16.61154 |
| NCK1      | 0.31301  | 1.242297 | 6.27022  | 7.825226 | 7.77E-12 | 1.66E-10 | 16.56926 |
| RARG      | -0.26217 | 0.833831 | 6.962527 | -7.82512 | 7.77E-12 | 1.66E-10 | 16.56877 |
| TKFC      | -0.70373 | 0.613983 | 6.984176 | -7.82309 | 7.85E-12 | 1.67E-10 | 16.55921 |
| AMT       | -0.43769 | 0.738315 | 8.907473 | -7.82115 | 7.92E-12 | 1.68E-10 | 16.5501  |
| ZNF112    | 0.345367 | 1.270474 | 4.932308 | 7.820209 | 7.96E-12 | 1.68E-10 | 16.5457  |
| TMEM258   | 0.31257  | 1.241918 | 10.54022 | 7.816477 | 8.10E-12 | 1.71E-10 | 16.52817 |
| SMARCA1   | 0.325754 | 1.253319 | 6.78     | 7.813439 | 8.22E-12 | 1.73E-10 | 16.5139  |
| MTERF1    | 0.384676 | 1.305567 | 5.040659 | 7.813018 | 8.24E-12 | 1.73E-10 | 16.51192 |
| SLIT2     | -0.62559 | 0.648155 | 8.159121 | -7.81047 | 8.34E-12 | 1.74E-10 | 16.49993 |
| PTEN      | 0.318633 | 1.247148 | 6.956044 | 7.809846 | 8.36E-12 | 1.75E-10 | 16.49703 |
| MYL12A    | 0.409261 | 1.328005 | 10.70912 | 7.807441 | 8.46E-12 | 1.76E-10 | 16.48573 |
| RNF219    | 0.31572  | 1.244632 | 5.443516 | 7.802705 | 8.65E-12 | 1.80E-10 | 16.4635  |
| TYRO3     | -0.34316 | 0.78831  | 5.727912 | -7.8004  | 8.75E-12 | 1.81E-10 | 16.45268 |
| SRSF10    | 0.35815  | 1.281781 | 7.443846 | 7.799069 | 8.81E-12 | 1.82E-10 | 16.44643 |
| STAG1     | 0.307609 | 1.237655 | 6.454505 | 7.798935 | 8.81E-12 | 1.82E-10 | 16.4458  |
| C19orf57  | -0.26216 | 0.833839 | 6.463187 | -7.78774 | 9.30E-12 | 1.91E-10 | 16.39323 |
| FANCL     | 0.416836 | 1.334996 | 5.593736 | 7.7873   | 9.32E-12 | 1.91E-10 | 16.39119 |
| SGPL1     | 0.216097 | 1.161587 | 6.461209 | 7.785505 | 9.40E-12 | 1.92E-10 | 16.38276 |
| NCBP2     | 0.257159 | 1.195123 | 7.379341 | 7.779346 | 9.68E-12 | 1.98E-10 | 16.35386 |
| ARHGEF17  | -0.3054  | 0.80922  | 7.056154 | -7.77622 | 9.82E-12 | 2.00E-10 | 16.3392  |
| CLDN3     | 0.681411 | 1.603707 | 6.93044  | 7.772982 | 9.98E-12 | 2.03E-10 | 16.324   |
| COPB1     | 0.244643 | 1.184799 | 9.90989  | 7.763479 | 1.04E-11 | 2.12E-10 | 16.27943 |
| GPX7      | 0.585763 | 1.500833 | 5.959011 | 7.762573 | 1.05E-11 | 2.12E-10 | 16.27518 |
| SLC12A6   | -0.47717 | 0.718383 | 6.871209 | -7.75687 | 1.08E-11 | 2.17E-10 | 16.24845 |
| UBD       | 1.308324 | 2.476536 | 7.601538 | 7.75503  | 1.09E-11 | 2.19E-10 | 16.2398  |
| SAE1      | 0.382884 | 1.303946 | 7.969121 | 7.749315 | 1.12E-11 | 2.24E-10 | 16.21301 |

|           |          |          |          |          |          |          |          |
|-----------|----------|----------|----------|----------|----------|----------|----------|
| FBXO7     | -0.28925 | 0.818329 | 10.04088 | -7.74223 | 1.16E-11 | 2.32E-10 | 16.17978 |
| TMX1      | 0.406546 | 1.325508 | 7.875604 | 7.737007 | 1.19E-11 | 2.37E-10 | 16.15531 |
| MYL6      | 0.302638 | 1.233397 | 12.16835 | 7.729129 | 1.23E-11 | 2.45E-10 | 16.11839 |
| NEIL1     | -0.23794 | 0.847954 | 5.894945 | -7.72702 | 1.24E-11 | 2.47E-10 | 16.10849 |
| TMEM50B   | 0.39085  | 1.311166 | 8.711538 | 7.722635 | 1.27E-11 | 2.52E-10 | 16.08796 |
| HSF4      | -0.29992 | 0.812296 | 6.555165 | -7.71503 | 1.32E-11 | 2.61E-10 | 16.05236 |
| BTN2A2    | 0.27113  | 1.206753 | 5.524945 | 7.705842 | 1.38E-11 | 2.72E-10 | 16.0093  |
| MYL10     | -0.24474 | 0.843966 | 5.925495 | -7.69819 | 1.43E-11 | 2.81E-10 | 15.97347 |
| CALML3    | -1.05406 | 0.48161  | 6.215934 | -7.6955  | 1.45E-11 | 2.84E-10 | 15.9609  |
| USP8      | 0.268271 | 1.204363 | 7.304835 | 7.692157 | 1.47E-11 | 2.88E-10 | 15.94523 |
| KLHL2     | 0.265971 | 1.202445 | 7.88022  | 7.682959 | 1.54E-11 | 3.00E-10 | 15.90217 |
| HLA-DMB   | 0.656957 | 1.576753 | 7.807912 | 7.678949 | 1.56E-11 | 3.05E-10 | 15.88341 |
| CTSV      | -0.8636  | 0.54958  | 8.510989 | -7.67598 | 1.59E-11 | 3.09E-10 | 15.86954 |
| ALDOB     | -0.47243 | 0.72075  | 12.87703 | -7.67382 | 1.60E-11 | 3.12E-10 | 15.85942 |
| HTR6      | -0.22274 | 0.856937 | 4.736593 | -7.67256 | 1.61E-11 | 3.13E-10 | 15.85351 |
| NRL       | -0.22784 | 0.853915 | 5.394725 | -7.66864 | 1.64E-11 | 3.17E-10 | 15.83516 |
| LONRF3    | -0.41082 | 0.752195 | 5.60989  | -7.6685  | 1.64E-11 | 3.17E-10 | 15.83451 |
| NAA35     | 0.293435 | 1.225555 | 5.81967  | 7.661667 | 1.70E-11 | 3.27E-10 | 15.80255 |
| DDX58     | 0.589174 | 1.504385 | 5.374176 | 7.661607 | 1.70E-11 | 3.27E-10 | 15.80227 |
| MACROD1   | -0.59043 | 0.664147 | 7.638901 | -7.66051 | 1.71E-11 | 3.28E-10 | 15.79713 |
| SERPINB1  | 0.380652 | 1.30193  | 7.367582 | 7.649703 | 1.80E-11 | 3.44E-10 | 15.74661 |
| RPF1      | 0.209362 | 1.156177 | 9.054835 | 7.648831 | 1.81E-11 | 3.45E-10 | 15.74253 |
| NECAB3    | -0.27685 | 0.825391 | 6.364835 | -7.64732 | 1.82E-11 | 3.47E-10 | 15.73545 |
| TNFRSF11I | 0.766053 | 1.700611 | 7.531209 | 7.644947 | 1.84E-11 | 3.50E-10 | 15.72437 |
| PNMA2     | 0.499565 | 1.413787 | 5.407473 | 7.639872 | 1.89E-11 | 3.57E-10 | 15.70065 |
| ACAA1     | -0.51046 | 0.701997 | 10.1967  | -7.63584 | 1.92E-11 | 3.64E-10 | 15.6818  |
| STEAP1    | 0.581068 | 1.495956 | 6.995385 | 7.624812 | 2.03E-11 | 3.82E-10 | 15.63026 |
| FEV       | -0.29877 | 0.812946 | 5.057692 | -7.62339 | 2.04E-11 | 3.84E-10 | 15.6236  |
| SMYD2     | 0.438928 | 1.355596 | 8.608791 | 7.620881 | 2.06E-11 | 3.88E-10 | 15.6119  |
| UCHL3     | 0.311362 | 1.240879 | 8.595275 | 7.620542 | 2.07E-11 | 3.88E-10 | 15.61031 |
| SLC5A5    | -0.2362  | 0.848977 | 7.144066 | -7.61975 | 2.08E-11 | 3.88E-10 | 15.60663 |
| RPAP3     | 0.32213  | 1.250175 | 5.245165 | 7.616237 | 2.11E-11 | 3.94E-10 | 15.5902  |
| BECN1     | 0.19643  | 1.145859 | 8.036484 | 7.612205 | 2.15E-11 | 4.01E-10 | 15.57137 |
| PPP1R16B  | -0.76729 | 0.587518 | 8.402308 | -7.61096 | 2.16E-11 | 4.01E-10 | 15.56554 |
| CD59      | 0.31086  | 1.240447 | 10.51242 | 7.610923 | 2.17E-11 | 4.01E-10 | 15.56538 |
| COL6A3    | 1.224976 | 2.337515 | 6.29967  | 7.60962  | 2.18E-11 | 4.03E-10 | 15.55929 |
| UBXN8     | 0.298633 | 1.229978 | 7.256154 | 7.608517 | 2.19E-11 | 4.04E-10 | 15.55414 |
| SNX10     | 0.688792 | 1.611934 | 8.166264 | 7.607762 | 2.20E-11 | 4.05E-10 | 15.55062 |
| C6orf15   | -0.35561 | 0.781537 | 6.411538 | -7.6044  | 2.23E-11 | 4.10E-10 | 15.53492 |
| PLA2G6    | -0.22759 | 0.854061 | 6.745934 | -7.60029 | 2.28E-11 | 4.18E-10 | 15.51573 |
| TSPAN1    | 0.519773 | 1.43373  | 11.65681 | 7.599788 | 2.28E-11 | 4.18E-10 | 15.51338 |
| ZNF200    | 0.257357 | 1.195287 | 5.208352 | 7.592752 | 2.36E-11 | 4.31E-10 | 15.48053 |
| PDK4      | -1.3887  | 0.38191  | 7.691978 | -7.59005 | 2.39E-11 | 4.36E-10 | 15.46794 |
| DNAJB6    | 0.317783 | 1.246413 | 6.477363 | 7.58298  | 2.47E-11 | 4.50E-10 | 15.43493 |
| ERF       | -0.34769 | 0.785841 | 6.701978 | -7.57775 | 2.54E-11 | 4.60E-10 | 15.4105  |
| SCN4A     | -0.23485 | 0.849776 | 4.465824 | -7.57715 | 2.54E-11 | 4.60E-10 | 15.40771 |
| KDELR3    | 0.334295 | 1.260761 | 5.708571 | 7.572531 | 2.60E-11 | 4.70E-10 | 15.38617 |

|          |          |          |          |          |          |          |          |
|----------|----------|----------|----------|----------|----------|----------|----------|
| CHTOP    | 0.243918 | 1.184204 | 7.716923 | 7.571319 | 2.62E-11 | 4.71E-10 | 15.38052 |
| DCTPP1   | 0.294193 | 1.226199 | 8.594176 | 7.569814 | 2.63E-11 | 4.74E-10 | 15.37349 |
| CDK18    | -0.37259 | 0.772392 | 6.209011 | -7.56587 | 2.68E-11 | 4.82E-10 | 15.35511 |
| GCC2     | 0.363174 | 1.286253 | 7.892418 | 7.558801 | 2.78E-11 | 4.97E-10 | 15.32213 |
| SLC12A3  | -0.9192  | 0.528801 | 7.651319 | -7.55685 | 2.80E-11 | 5.01E-10 | 15.31305 |
| TBXA2R   | -0.21314 | 0.862658 | 5.553297 | -7.55482 | 2.83E-11 | 5.05E-10 | 15.30358 |
| ELK3     | 0.293536 | 1.225641 | 5.064286 | 7.554326 | 2.84E-11 | 5.05E-10 | 15.30126 |
| UBAP2    | 0.258778 | 1.196465 | 7.282967 | 7.552636 | 2.86E-11 | 5.08E-10 | 15.29338 |
| CASP4    | 0.549585 | 1.463664 | 6.283077 | 7.548003 | 2.92E-11 | 5.18E-10 | 15.27178 |
| CPNE7    | -0.2843  | 0.821137 | 5.665714 | -7.54621 | 2.95E-11 | 5.21E-10 | 15.26343 |
| CAMK2G   | -0.32369 | 0.799026 | 7.004066 | -7.53984 | 3.04E-11 | 5.36E-10 | 15.23374 |
| RAB27A   | 0.450575 | 1.366585 | 6.078681 | 7.538135 | 3.06E-11 | 5.39E-10 | 15.22578 |
| SEC61G   | 0.334227 | 1.260702 | 9.615495 | 7.53644  | 3.09E-11 | 5.43E-10 | 15.21789 |
| SPINT2   | 0.268435 | 1.2045   | 9.902308 | 7.532488 | 3.15E-11 | 5.52E-10 | 15.19947 |
| ATR      | 0.287908 | 1.220869 | 5.888242 | 7.530323 | 3.18E-11 | 5.56E-10 | 15.18938 |
| BPHL     | -0.59982 | 0.659836 | 9.351429 | -7.50681 | 3.56E-11 | 6.21E-10 | 15.07987 |
| CLDN15   | -0.29527 | 0.814922 | 8.057033 | -7.50593 | 3.57E-11 | 6.22E-10 | 15.07576 |
| FAM102A  | -0.38377 | 0.766431 | 7.18044  | -7.49974 | 3.68E-11 | 6.40E-10 | 15.04697 |
| MET      | 0.374865 | 1.296718 | 7.534286 | 7.498879 | 3.69E-11 | 6.41E-10 | 15.04295 |
| TXLNA    | 0.327821 | 1.255116 | 6.164066 | 7.48965  | 3.86E-11 | 6.68E-10 | 15       |
| FOXN1    | -0.22831 | 0.853632 | 4.872967 | -7.48862 | 3.88E-11 | 6.70E-10 | 14.99518 |
| FLII     | 0.294507 | 1.226466 | 7.298462 | 7.48749  | 3.90E-11 | 6.72E-10 | 14.98995 |
| DBR1     | 0.334662 | 1.261082 | 5.085275 | 7.484726 | 3.95E-11 | 6.80E-10 | 14.97709 |
| TGM5     | -0.26612 | 0.831555 | 6.173187 | -7.48418 | 3.96E-11 | 6.80E-10 | 14.97456 |
| EXT2     | 0.215831 | 1.161373 | 7.649121 | 7.481226 | 4.01E-11 | 6.88E-10 | 14.9608  |
| PLK2     | 0.782662 | 1.720302 | 4.916813 | 7.478761 | 4.06E-11 | 6.95E-10 | 14.94933 |
| AGA      | 0.392275 | 1.312462 | 7.066374 | 7.474517 | 4.15E-11 | 7.08E-10 | 14.92959 |
| DAPK2    | -0.22557 | 0.855257 | 4.947802 | -7.47374 | 4.16E-11 | 7.09E-10 | 14.926   |
| DERL2    | 0.285343 | 1.2187   | 8.501538 | 7.473227 | 4.17E-11 | 7.09E-10 | 14.9236  |
| NAB2     | -0.34966 | 0.784768 | 5.912308 | -7.47236 | 4.19E-11 | 7.11E-10 | 14.91958 |
| AGFG1    | 0.278502 | 1.212935 | 6.65033  | 7.469411 | 4.25E-11 | 7.19E-10 | 14.90585 |
| GOS2     | -0.96012 | 0.514014 | 9.03978  | -7.4688  | 4.26E-11 | 7.20E-10 | 14.903   |
| IFNGR2   | 0.338464 | 1.264409 | 8.368242 | 7.465613 | 4.32E-11 | 7.30E-10 | 14.88819 |
| TP53     | 0.330116 | 1.257114 | 5.178462 | 7.465028 | 4.34E-11 | 7.30E-10 | 14.88547 |
| MAP9     | 0.3547   | 1.27872  | 5.366923 | 7.462306 | 4.39E-11 | 7.38E-10 | 14.87281 |
| HN1L     | 0.282507 | 1.216307 | 7.292527 | 7.45838  | 4.48E-11 | 7.51E-10 | 14.85456 |
| SERPINA4 | -0.56753 | 0.67477  | 5.84044  | -7.45647 | 4.52E-11 | 7.56E-10 | 14.84566 |
| HLA-C    | 0.532155 | 1.446087 | 11.68011 | 7.455428 | 4.54E-11 | 7.58E-10 | 14.84083 |
| ALAS1    | 0.415826 | 1.334062 | 7.787802 | 7.449463 | 4.67E-11 | 7.79E-10 | 14.81311 |
| SRPK2    | 0.222251 | 1.166552 | 6.671209 | 7.443608 | 4.80E-11 | 7.99E-10 | 14.7859  |
| ZDHHC13  | 0.374357 | 1.296262 | 6.041209 | 7.439046 | 4.91E-11 | 8.15E-10 | 14.76471 |
| HHAT     | 0.331604 | 1.258412 | 5.636154 | 7.43793  | 4.93E-11 | 8.17E-10 | 14.75952 |
| SORBS3   | -0.2374  | 0.848275 | 5.96978  | -7.43739 | 4.94E-11 | 8.18E-10 | 14.75704 |
| PLA2G4C  | 0.730251 | 1.658928 | 6.682418 | 7.434497 | 5.01E-11 | 8.28E-10 | 14.74358 |
| FBRS     | -0.23192 | 0.851499 | 5.608791 | -7.4341  | 5.02E-11 | 8.28E-10 | 14.74174 |
| ARF4     | 0.282691 | 1.216462 | 9.960879 | 7.433157 | 5.04E-11 | 8.30E-10 | 14.73735 |
| TRPM6    | -0.32468 | 0.798475 | 5.068791 | -7.43204 | 5.07E-11 | 8.33E-10 | 14.73215 |

|          |          |          |          |          |          |          |          |
|----------|----------|----------|----------|----------|----------|----------|----------|
| PPID     | 0.420942 | 1.338801 | 7.910549 | 7.429265 | 5.14E-11 | 8.42E-10 | 14.71927 |
| RBBP7    | 0.246894 | 1.186649 | 9.172308 | 7.427604 | 5.18E-11 | 8.47E-10 | 14.71156 |
| ZNF816   | 0.414493 | 1.33283  | 6.827143 | 7.425644 | 5.23E-11 | 8.53E-10 | 14.70246 |
| GSTA3    | -0.48878 | 0.712629 | 7.173297 | -7.4233  | 5.29E-11 | 8.61E-10 | 14.69157 |
| SCARB2   | 0.401928 | 1.321272 | 7.575495 | 7.421198 | 5.34E-11 | 8.68E-10 | 14.68182 |
| MAP4K4   | 0.367285 | 1.289923 | 5.389451 | 7.42004  | 5.37E-11 | 8.71E-10 | 14.67644 |
| IQSEC2   | -0.24323 | 0.844851 | 5.754286 | -7.41849 | 5.41E-11 | 8.76E-10 | 14.66926 |
| LRRFIP1  | 0.381739 | 1.302912 | 7.737033 | 7.41238  | 5.57E-11 | 9.00E-10 | 14.64088 |
| XPO1     | 0.327082 | 1.254474 | 8.67044  | 7.411863 | 5.58E-11 | 9.00E-10 | 14.63848 |
| MAP3K10  | -0.22972 | 0.852798 | 6.798791 | -7.40962 | 5.64E-11 | 9.08E-10 | 14.62807 |
| HIF1A    | 0.521908 | 1.435853 | 10.60396 | 7.408862 | 5.66E-11 | 9.10E-10 | 14.62455 |
| KDM5B    | 0.292773 | 1.224993 | 6.66956  | 7.405141 | 5.76E-11 | 9.24E-10 | 14.60728 |
| PRX      | -0.28894 | 0.818505 | 6.244945 | -7.39474 | 6.05E-11 | 9.69E-10 | 14.55901 |
| KIAA0930 | 0.306072 | 1.236337 | 5.894615 | 7.394225 | 6.07E-11 | 9.70E-10 | 14.55663 |
| ZP2      | -0.39178 | 0.762187 | 4.986044 | -7.39287 | 6.11E-11 | 9.74E-10 | 14.55036 |
| C3orf18  | -0.30457 | 0.809681 | 6.833516 | -7.39087 | 6.17E-11 | 9.82E-10 | 14.54108 |
| MAPK1    | 0.300043 | 1.231182 | 7.00033  | 7.389564 | 6.20E-11 | 9.84E-10 | 14.53501 |
| TSPO     | 0.417976 | 1.336052 | 8.305604 | 7.389538 | 6.20E-11 | 9.84E-10 | 14.53489 |
| TUBG2    | -0.35955 | 0.779407 | 5.352418 | -7.38843 | 6.24E-11 | 9.87E-10 | 14.52977 |
| CD74     | 0.755918 | 1.688706 | 9.75011  | 7.385465 | 6.33E-11 | 9.98E-10 | 14.516   |
| LPGAT1   | 0.536618 | 1.450568 | 5.553187 | 7.385385 | 6.33E-11 | 9.98E-10 | 14.51563 |
| EPHX1    | -0.61621 | 0.652384 | 8.995934 | -7.3835  | 6.38E-11 | 1.01E-09 | 14.50687 |
| DBI      | 0.333845 | 1.260368 | 11.86813 | 7.38165  | 6.44E-11 | 1.01E-09 | 14.49831 |
| TRIM24   | 0.412444 | 1.330939 | 6.183956 | 7.378092 | 6.55E-11 | 1.03E-09 | 14.48181 |
| CCDC51   | 0.372932 | 1.294982 | 8.246374 | 7.375792 | 6.62E-11 | 1.04E-09 | 14.47115 |
| RXRA     | -0.31631 | 0.803119 | 6.759451 | -7.37284 | 6.71E-11 | 1.05E-09 | 14.45747 |
| BZRAP1   | -0.28301 | 0.821875 | 5.434615 | -7.37138 | 6.76E-11 | 1.05E-09 | 14.4507  |
| TUG1     | 0.30572  | 1.236035 | 8.078571 | 7.369932 | 6.81E-11 | 1.06E-09 | 14.44399 |
| C2orf72  | -0.2492  | 0.841361 | 5.372637 | -7.36507 | 6.97E-11 | 1.08E-09 | 14.42144 |
| GAR1     | 0.309435 | 1.239222 | 7.467582 | 7.363825 | 7.01E-11 | 1.09E-09 | 14.41568 |
| KIAA0101 | 0.588058 | 1.503222 | 5.233407 | 7.362697 | 7.05E-11 | 1.09E-09 | 14.41045 |
| SQRDL    | 0.318377 | 1.246927 | 9.594396 | 7.362283 | 7.06E-11 | 1.09E-09 | 14.40854 |
| FAM3A    | -0.23707 | 0.848468 | 6.984725 | -7.35354 | 7.36E-11 | 1.14E-09 | 14.36803 |
| ARHGAP29 | 0.529816 | 1.443745 | 9.113736 | 7.350621 | 7.46E-11 | 1.15E-09 | 14.35451 |
| HNRNPM   | 0.339942 | 1.265706 | 9.055495 | 7.3506   | 7.46E-11 | 1.15E-09 | 14.35441 |
| ADNP     | 0.332208 | 1.258938 | 7.883626 | 7.349396 | 7.50E-11 | 1.15E-09 | 14.34883 |
| RB1      | 0.238101 | 1.17944  | 5.542308 | 7.346733 | 7.60E-11 | 1.16E-09 | 14.3365  |
| TMEM87A  | 0.258179 | 1.195968 | 7.735714 | 7.344886 | 7.67E-11 | 1.17E-09 | 14.32795 |
| C3orf14  | 0.364169 | 1.28714  | 6.657692 | 7.343817 | 7.70E-11 | 1.17E-09 | 14.323   |
| UPB1     | -0.82448 | 0.564684 | 8.480549 | -7.34361 | 7.71E-11 | 1.17E-09 | 14.32206 |
| FOCAD    | 0.457802 | 1.373448 | 6.437473 | 7.343037 | 7.73E-11 | 1.18E-09 | 14.31938 |
| MACF1    | 0.383773 | 1.30475  | 7.83956  | 7.33771  | 7.93E-11 | 1.20E-09 | 14.29472 |
| PRR36    | -0.29941 | 0.812584 | 5.738462 | -7.33595 | 8.00E-11 | 1.21E-09 | 14.28655 |
| SUV420H1 | 0.366618 | 1.289327 | 7.109121 | 7.334754 | 8.04E-11 | 1.22E-09 | 14.28103 |
| RAB38    | 0.319952 | 1.248289 | 6.526044 | 7.331067 | 8.18E-11 | 1.24E-09 | 14.26397 |
| BUB3     | 0.237512 | 1.178958 | 7.835495 | 7.325892 | 8.39E-11 | 1.26E-09 | 14.24001 |
| DDRGK1   | 0.303435 | 1.234079 | 8.054615 | 7.317246 | 8.74E-11 | 1.31E-09 | 14.20001 |

|          |          |          |          |          |          |          |          |
|----------|----------|----------|----------|----------|----------|----------|----------|
| TRA2B    | 0.231126 | 1.17375  | 6.564945 | 7.316026 | 8.79E-11 | 1.32E-09 | 14.19436 |
| TMEM140  | 0.535725 | 1.44967  | 8.202527 | 7.31476  | 8.84E-11 | 1.32E-09 | 14.18851 |
| CDK14    | -0.3042  | 0.809892 | 6.930659 | -7.31426 | 8.86E-11 | 1.33E-09 | 14.1862  |
| IRAK1    | 0.372638 | 1.294718 | 9.242967 | 7.308183 | 9.12E-11 | 1.36E-09 | 14.15808 |
| CYP27B1  | -1.28678 | 0.409865 | 8.408681 | -7.30322 | 9.34E-11 | 1.39E-09 | 14.13513 |
| CCNB1    | 0.617295 | 1.533996 | 5.063516 | 7.301675 | 9.40E-11 | 1.40E-09 | 14.12799 |
| CRELD2   | 0.338343 | 1.264304 | 8.182747 | 7.297827 | 9.58E-11 | 1.42E-09 | 14.1102  |
| SEC22A   | 0.255976 | 1.194143 | 4.955495 | 7.293661 | 9.77E-11 | 1.45E-09 | 14.09094 |
| PIK3R3   | 0.271662 | 1.207198 | 5.649121 | 7.292574 | 9.82E-11 | 1.45E-09 | 14.08591 |
| SEMA3G   | -0.53472 | 0.690293 | 5.553187 | -7.28749 | 1.01E-10 | 1.49E-09 | 14.0624  |
| RAB22A   | 0.249952 | 1.189167 | 7.591429 | 7.28195  | 1.03E-10 | 1.52E-09 | 14.03681 |
| ZNF146   | 0.279749 | 1.213983 | 7.177033 | 7.27925  | 1.05E-10 | 1.54E-09 | 14.02433 |
| HTATIP2  | 0.462362 | 1.377796 | 7.184945 | 7.277099 | 1.06E-10 | 1.55E-09 | 14.01439 |
| FAM212B  | -0.26514 | 0.832118 | 5.777582 | -7.27431 | 1.07E-10 | 1.57E-09 | 14.00149 |
| OR1D2    | -0.24688 | 0.842717 | 5.698352 | -7.27408 | 1.07E-10 | 1.57E-09 | 14.00046 |
| RAC1     | 0.222614 | 1.166845 | 11.14769 | 7.271824 | 1.08E-10 | 1.58E-09 | 13.99003 |
| WNT10B   | -0.36828 | 0.774705 | 6.625275 | -7.27118 | 1.09E-10 | 1.59E-09 | 13.98704 |
| S100A6   | 0.585797 | 1.500868 | 9.890549 | 7.27004  | 1.09E-10 | 1.59E-09 | 13.98179 |
| IL13RA1  | 0.365652 | 1.288464 | 7.135165 | 7.266976 | 1.11E-10 | 1.61E-09 | 13.96764 |
| GTF2H1   | 0.320662 | 1.248903 | 7.088352 | 7.264906 | 1.12E-10 | 1.63E-09 | 13.95808 |
| AFP      | -0.3287  | 0.796256 | 5.296154 | -7.26445 | 1.12E-10 | 1.63E-09 | 13.95596 |
| DPF1     | -0.25323 | 0.839018 | 5.99956  | -7.26255 | 1.13E-10 | 1.64E-09 | 13.94721 |
| CAMK2A   | -0.2958  | 0.814619 | 5.812637 | -7.26107 | 1.14E-10 | 1.65E-09 | 13.94037 |
| FAIM     | 0.529841 | 1.44377  | 5.994835 | 7.260532 | 1.14E-10 | 1.65E-09 | 13.93788 |
| ADGRG1   | 0.530014 | 1.443944 | 8.632747 | 7.259203 | 1.15E-10 | 1.65E-09 | 13.93174 |
| SMAD2    | 0.202841 | 1.150962 | 7.728132 | 7.258867 | 1.15E-10 | 1.65E-09 | 13.93019 |
| GRN      | 0.319227 | 1.247662 | 8.933077 | 7.257252 | 1.16E-10 | 1.66E-09 | 13.92274 |
| ESR1     | -0.19613 | 0.872892 | 5.237363 | -7.2568  | 1.16E-10 | 1.67E-09 | 13.92064 |
| FUZ      | -0.42707 | 0.74377  | 6.710549 | -7.25508 | 1.17E-10 | 1.68E-09 | 13.91272 |
| HPD      | -0.89415 | 0.538064 | 11.3611  | -7.25456 | 1.17E-10 | 1.68E-09 | 13.91033 |
| TRIM15   | -0.24615 | 0.843144 | 6.101538 | -7.25064 | 1.20E-10 | 1.71E-09 | 13.89222 |
| LBR      | 0.423652 | 1.341319 | 8.453846 | 7.249453 | 1.20E-10 | 1.71E-09 | 13.88674 |
| CCNB1IP1 | -0.39714 | 0.759365 | 9.262527 | -7.24663 | 1.22E-10 | 1.73E-09 | 13.87371 |
| RWDD3    | 0.350478 | 1.274983 | 6.244835 | 7.245634 | 1.23E-10 | 1.74E-09 | 13.86912 |
| PITX3    | -0.29042 | 0.817667 | 5.927692 | -7.23995 | 1.26E-10 | 1.78E-09 | 13.8429  |
| EMP3     | 0.719744 | 1.64689  | 6.904396 | 7.239178 | 1.26E-10 | 1.79E-09 | 13.83933 |
| SWAP70   | 0.374899 | 1.296748 | 6.065824 | 7.236267 | 1.28E-10 | 1.81E-09 | 13.8259  |
| TUBB     | 0.439865 | 1.356477 | 9.201429 | 7.231156 | 1.31E-10 | 1.85E-09 | 13.80232 |
| RRAGC    | 0.307222 | 1.237323 | 8.686923 | 7.230183 | 1.32E-10 | 1.85E-09 | 13.79784 |
| DAD1     | 0.231498 | 1.174053 | 10.61187 | 7.224049 | 1.36E-10 | 1.91E-09 | 13.76955 |
| PRDM14   | -0.3185  | 0.801905 | 5.64011  | -7.22348 | 1.36E-10 | 1.91E-09 | 13.76691 |
| PSME1    | 0.282382 | 1.216201 | 10.09681 | 7.222391 | 1.37E-10 | 1.91E-09 | 13.76191 |
| EIF4G2   | 0.212024 | 1.158312 | 10.28593 | 7.220824 | 1.38E-10 | 1.92E-09 | 13.75468 |
| ATP10B   | -0.29168 | 0.81695  | 5.54011  | -7.22053 | 1.38E-10 | 1.92E-09 | 13.75331 |
| SIRT3    | -0.2168  | 0.860474 | 6.506923 | -7.22009 | 1.38E-10 | 1.92E-09 | 13.75128 |
| TMED9    | 0.267773 | 1.203948 | 9.442198 | 7.219731 | 1.38E-10 | 1.93E-09 | 13.74964 |
| SPA17    | 0.435406 | 1.352291 | 6.698571 | 7.218784 | 1.39E-10 | 1.93E-09 | 13.74527 |



|          |          |          |          |          |          |          |          |
|----------|----------|----------|----------|----------|----------|----------|----------|
| MFSD10   | 0.440556 | 1.357127 | 5.802857 | 7.216833 | 1.40E-10 | 1.94E-09 | 13.73628 |
| LAPTM5   | 1.079512 | 2.113321 | 7.251868 | 7.216567 | 1.41E-10 | 1.94E-09 | 13.73505 |
| ABCC10   | 0.302425 | 1.233216 | 6.618681 | 7.209994 | 1.45E-10 | 2.00E-09 | 13.70476 |
| HLA-DRB1 | 0.81628  | 1.76086  | 10.64626 | 7.204696 | 1.49E-10 | 2.05E-09 | 13.68035 |
| RNF139   | 0.259807 | 1.197318 | 8.25978  | 7.200446 | 1.52E-10 | 2.09E-09 | 13.66077 |
| CELF3    | -0.24193 | 0.845615 | 6.183626 | -7.19795 | 1.53E-10 | 2.11E-09 | 13.64925 |
| DUSP26   | -0.31077 | 0.80621  | 5.151538 | -7.19738 | 1.54E-10 | 2.11E-09 | 13.64666 |
| ALB      | -1.85773 | 0.275909 | 9.533297 | -7.19682 | 1.54E-10 | 2.11E-09 | 13.64405 |
| FADD     | 0.320271 | 1.248565 | 7.710549 | 7.194341 | 1.56E-10 | 2.13E-09 | 13.63265 |
| LRP10    | 0.278454 | 1.212895 | 8.578132 | 7.19231  | 1.58E-10 | 2.15E-09 | 13.62329 |
| VANGL1   | 0.322372 | 1.250385 | 5.436154 | 7.18467  | 1.63E-10 | 2.23E-09 | 13.58811 |
| HDAC1    | 0.351106 | 1.275538 | 7.263407 | 7.18272  | 1.65E-10 | 2.24E-09 | 13.57914 |
| ALDH6A1  | -0.51448 | 0.700046 | 11.09407 | -7.18257 | 1.65E-10 | 2.24E-09 | 13.57846 |
| KRT83    | -0.25453 | 0.838262 | 5.28044  | -7.18206 | 1.65E-10 | 2.24E-09 | 13.57609 |
| GPD1     | -0.50885 | 0.702782 | 8.80011  | -7.18145 | 1.66E-10 | 2.25E-09 | 13.57331 |
| MCM3     | 0.324807 | 1.252497 | 6.986923 | 7.178338 | 1.68E-10 | 2.28E-09 | 13.55896 |
| NDNF     | -1.28862 | 0.409343 | 6.454945 | -7.17548 | 1.71E-10 | 2.30E-09 | 13.54579 |
| CA7      | -0.31189 | 0.805586 | 5.800769 | -7.17289 | 1.73E-10 | 2.33E-09 | 13.53389 |
| BZW2     | 0.310362 | 1.240019 | 8.52978  | 7.169921 | 1.75E-10 | 2.36E-09 | 13.52023 |
| GBP2     | 0.79699  | 1.737473 | 5.348681 | 7.169617 | 1.75E-10 | 2.36E-09 | 13.51883 |
| ARHGAP35 | -0.22129 | 0.857795 | 5.822308 | -7.16816 | 1.77E-10 | 2.37E-09 | 13.51211 |
| GABRR2   | -0.27475 | 0.826594 | 6.31044  | -7.16709 | 1.77E-10 | 2.38E-09 | 13.50718 |
| PIM1     | -0.36808 | 0.774814 | 6.444505 | -7.16678 | 1.78E-10 | 2.38E-09 | 13.50578 |
| MARCKSL1 | 0.587478 | 1.502618 | 7.507033 | 7.161704 | 1.82E-10 | 2.43E-09 | 13.48242 |
| SPRY1    | 0.339942 | 1.265706 | 6.985495 | 7.158756 | 1.84E-10 | 2.46E-09 | 13.46887 |
| ARHGEF16 | -0.28439 | 0.821091 | 6.651978 | -7.15686 | 1.86E-10 | 2.48E-09 | 13.46013 |
| SRI      | 0.285464 | 1.218802 | 8.487033 | 7.154851 | 1.88E-10 | 2.50E-09 | 13.45091 |
| VCAN     | 0.866459 | 1.823182 | 4.839121 | 7.152556 | 1.90E-10 | 2.52E-09 | 13.44035 |
| PDLIM1   | 0.577222 | 1.491974 | 9.35044  | 7.148012 | 1.94E-10 | 2.57E-09 | 13.41946 |
| UBE2D1   | 0.251937 | 1.190805 | 5.021758 | 7.146454 | 1.95E-10 | 2.59E-09 | 13.4123  |
| NFATC4   | -0.20338 | 0.868512 | 5.717253 | -7.14471 | 1.97E-10 | 2.60E-09 | 13.40429 |
| RAB8A    | 0.281348 | 1.21533  | 9.10978  | 7.141624 | 2.00E-10 | 2.64E-09 | 13.3901  |
| NPHS1    | -0.57524 | 0.671176 | 5.41989  | -7.14024 | 2.01E-10 | 2.65E-09 | 13.38375 |
| CTSZ     | 0.605459 | 1.521463 | 6.065055 | 7.140119 | 2.01E-10 | 2.65E-09 | 13.38318 |
| SHBG     | -0.38873 | 0.763799 | 6.134725 | -7.13747 | 2.04E-10 | 2.68E-09 | 13.371   |
| TP53BP1  | 0.246628 | 1.186431 | 6.44022  | 7.132717 | 2.09E-10 | 2.73E-09 | 13.34917 |
| MYOZ1    | -0.257   | 0.836826 | 5.887912 | -7.13158 | 2.10E-10 | 2.74E-09 | 13.34392 |
| ELK1     | -0.20351 | 0.868434 | 6.251319 | -7.13059 | 2.11E-10 | 2.75E-09 | 13.33939 |
| TRIP12   | 0.263329 | 1.200245 | 8.86     | 7.123477 | 2.18E-10 | 2.84E-09 | 13.30672 |
| PPP1R12B | -0.22088 | 0.858039 | 5.600989 | -7.12157 | 2.20E-10 | 2.86E-09 | 13.29796 |
| SLC10A1  | -0.24368 | 0.844588 | 5.303846 | -7.11832 | 2.23E-10 | 2.90E-09 | 13.28304 |
| DNAJB5   | -0.34197 | 0.788963 | 5.372198 | -7.11431 | 2.27E-10 | 2.95E-09 | 13.26463 |
| ALOX5    | 0.469792 | 1.38491  | 4.562967 | 7.106758 | 2.36E-10 | 3.05E-09 | 13.22995 |
| PTGDS    | -0.92344 | 0.52725  | 7.868571 | -7.10389 | 2.39E-10 | 3.09E-09 | 13.21678 |
| FSTL1    | 0.657213 | 1.577033 | 8.79956  | 7.103495 | 2.39E-10 | 3.09E-09 | 13.21498 |
| RAE1     | 0.267778 | 1.203952 | 7.502418 | 7.099313 | 2.44E-10 | 3.15E-09 | 13.19579 |
| CEL      | -0.52942 | 0.692833 | 5.094286 | -7.09517 | 2.49E-10 | 3.21E-09 | 13.17678 |

|           |          |          |          |          |          |          |          |
|-----------|----------|----------|----------|----------|----------|----------|----------|
| SOAT1     | 0.360643 | 1.283998 | 5.337253 | 7.0946   | 2.49E-10 | 3.21E-09 | 13.17417 |
| MAGED1    | 0.230444 | 1.173196 | 9.893956 | 7.093651 | 2.50E-10 | 3.22E-09 | 13.16981 |
| CALCOCO1  | -0.26915 | 0.829808 | 6.945165 | -7.09271 | 2.52E-10 | 3.23E-09 | 13.16552 |
| MTPAP     | 0.235787 | 1.177549 | 6.837033 | 7.088598 | 2.57E-10 | 3.29E-09 | 13.14663 |
| STT3A     | 0.38628  | 1.307019 | 8.273626 | 7.086381 | 2.59E-10 | 3.31E-09 | 13.13647 |
| HSPB8     | 0.828164 | 1.775425 | 8.776923 | 7.086031 | 2.60E-10 | 3.32E-09 | 13.13486 |
| LRRC49    | 0.338628 | 1.264553 | 5.475714 | 7.08406  | 2.62E-10 | 3.34E-09 | 13.12582 |
| SUCO      | 0.281647 | 1.215582 | 7.053407 | 7.083407 | 2.63E-10 | 3.35E-09 | 13.12283 |
| CA5B      | -0.22547 | 0.855314 | 5.342198 | -7.08144 | 2.65E-10 | 3.37E-09 | 13.11379 |
| GPRASP1   | -0.49052 | 0.711768 | 6.153956 | -7.07296 | 2.76E-10 | 3.50E-09 | 13.07495 |
| MMS19     | 0.256217 | 1.194343 | 6.716484 | 7.067986 | 2.83E-10 | 3.58E-09 | 13.05214 |
| GTF2E1    | 0.30787  | 1.237878 | 7.036374 | 7.063268 | 2.89E-10 | 3.66E-09 | 13.03052 |
| ZNF227    | 0.301633 | 1.232539 | 4.772637 | 7.062889 | 2.89E-10 | 3.66E-09 | 13.02878 |
| DDR1      | 0.352821 | 1.277056 | 8.961429 | 7.060871 | 2.92E-10 | 3.68E-09 | 13.01954 |
| GRPR      | -0.26462 | 0.832419 | 6.841319 | -7.06061 | 2.92E-10 | 3.68E-09 | 13.01835 |
| ZWINT     | 0.599899 | 1.51561  | 6.772088 | 7.059994 | 2.93E-10 | 3.69E-09 | 13.01552 |
| IGSF3     | 0.336338 | 1.262548 | 7.201538 | 7.055477 | 3.00E-10 | 3.76E-09 | 12.99483 |
| ZNF544    | 0.274111 | 1.209249 | 7.190549 | 7.050148 | 3.07E-10 | 3.85E-09 | 12.97042 |
| CPD       | 0.373319 | 1.295329 | 6.883956 | 7.049594 | 3.08E-10 | 3.85E-09 | 12.96789 |
| PPFIBP1   | 0.572671 | 1.487275 | 5.533407 | 7.049525 | 3.08E-10 | 3.85E-09 | 12.96757 |
| PPP4R1    | 0.345242 | 1.270364 | 8.016593 | 7.046138 | 3.13E-10 | 3.91E-09 | 12.95206 |
| IHH       | -0.27183 | 0.828271 | 6.453407 | -7.04463 | 3.15E-10 | 3.93E-09 | 12.94515 |
| POLM      | -0.27171 | 0.828337 | 5.338681 | -7.0436  | 3.17E-10 | 3.94E-09 | 12.94043 |
| C2        | 0.848295 | 1.800372 | 6.712747 | 7.043243 | 3.17E-10 | 3.94E-09 | 12.93881 |
| EFCC1     | -0.31894 | 0.80166  | 5.14011  | -7.0388  | 3.24E-10 | 4.02E-09 | 12.91848 |
| MID1      | 0.404512 | 1.323641 | 6.393077 | 7.03764  | 3.26E-10 | 4.04E-09 | 12.91316 |
| PHYHIP    | -0.31208 | 0.805478 | 5.171978 | -7.03629 | 3.28E-10 | 4.06E-09 | 12.90697 |
| LRRC59    | 0.404802 | 1.323907 | 8.926264 | 7.034923 | 3.30E-10 | 4.08E-09 | 12.90073 |
| UBE2L3    | 0.236546 | 1.178169 | 7.991538 | 7.034223 | 3.31E-10 | 4.08E-09 | 12.89753 |
| DKFZP586I | 0.401425 | 1.320812 | 7.232637 | 7.032705 | 3.33E-10 | 4.11E-09 | 12.89058 |
| CENPU     | 0.480126 | 1.394865 | 4.483077 | 7.030544 | 3.37E-10 | 4.14E-09 | 12.88069 |
| SAYSD1    | 0.293343 | 1.225477 | 6.015495 | 7.029482 | 3.38E-10 | 4.16E-09 | 12.87583 |
| MAGI2     | -0.30592 | 0.808927 | 5.212418 | -7.02879 | 3.39E-10 | 4.17E-09 | 12.87264 |
| FBXO21    | -0.53959 | 0.687967 | 9.691648 | -7.02478 | 3.46E-10 | 4.24E-09 | 12.85431 |
| SLC13A2   | -0.56518 | 0.675872 | 7.347473 | -7.01888 | 3.56E-10 | 4.35E-09 | 12.82735 |
| CAPN2     | 0.353667 | 1.277804 | 10.76989 | 7.015753 | 3.61E-10 | 4.41E-09 | 12.81304 |
| PTCRA     | -0.21656 | 0.860615 | 6.897692 | -7.01558 | 3.61E-10 | 4.41E-09 | 12.81224 |
| RPP40     | 0.351285 | 1.275696 | 6.641538 | 7.014453 | 3.63E-10 | 4.42E-09 | 12.80709 |
| DNM1L     | 0.26701  | 1.203311 | 7.087473 | 7.01275  | 3.66E-10 | 4.45E-09 | 12.79931 |
| HR        | -0.23134 | 0.851844 | 5.265385 | -7.01274 | 3.66E-10 | 4.45E-09 | 12.79924 |
| MISP      | -0.2859  | 0.820228 | 7.782967 | -7.00981 | 3.71E-10 | 4.50E-09 | 12.78588 |
| MYLIP     | 0.446193 | 1.362441 | 7.259341 | 7.006722 | 3.76E-10 | 4.56E-09 | 12.77175 |
| AKAP12    | 0.925309 | 1.899091 | 8.336484 | 7.006173 | 3.77E-10 | 4.56E-09 | 12.76924 |
| ASNS      | 0.554048 | 1.4682   | 5.426154 | 7.00597  | 3.78E-10 | 4.56E-09 | 12.76831 |
| KCNN3     | -0.19975 | 0.870699 | 4.482308 | -7.00326 | 3.83E-10 | 4.61E-09 | 12.75594 |
| TOP2B     | 0.295155 | 1.227016 | 7.887912 | 7.002851 | 3.83E-10 | 4.62E-09 | 12.75405 |
| SMARCA4   | 0.237758 | 1.179159 | 6.886703 | 7.001752 | 3.85E-10 | 4.63E-09 | 12.74903 |

|           |          |          |          |          |          |          |          |
|-----------|----------|----------|----------|----------|----------|----------|----------|
| IRF2BP1   | -0.23022 | 0.852506 | 7.336374 | -7.00094 | 3.87E-10 | 4.64E-09 | 12.74533 |
| TPST1     | 0.367164 | 1.289815 | 6.243956 | 7.000319 | 3.88E-10 | 4.65E-09 | 12.74248 |
| FBP1      | -0.60626 | 0.656899 | 11.15868 | -6.99305 | 4.01E-10 | 4.81E-09 | 12.70926 |
| TERT      | -0.23058 | 0.852289 | 5.01967  | -6.99209 | 4.03E-10 | 4.81E-09 | 12.7049  |
| GADD45B   | -1.11448 | 0.461858 | 8.227363 | -6.992   | 4.03E-10 | 4.81E-09 | 12.70448 |
| MLXIPL    | -0.39287 | 0.761611 | 6.786374 | -6.98927 | 4.08E-10 | 4.87E-09 | 12.69199 |
| FRYL      | 0.26572  | 1.202236 | 6.458791 | 6.988571 | 4.10E-10 | 4.88E-09 | 12.68882 |
| SEC31B    | -0.27902 | 0.824148 | 6.095934 | -6.98767 | 4.11E-10 | 4.89E-09 | 12.68469 |
| USP16     | 0.235522 | 1.177332 | 7.664945 | 6.986752 | 4.13E-10 | 4.91E-09 | 12.68051 |
| NMT2      | 0.434338 | 1.351291 | 6        | 6.984917 | 4.17E-10 | 4.94E-09 | 12.67213 |
| ETNK2     | -0.60797 | 0.656121 | 7.320879 | -6.98484 | 4.17E-10 | 4.94E-09 | 12.67178 |
| NES       | -0.40348 | 0.756031 | 6.943736 | -6.98278 | 4.21E-10 | 4.98E-09 | 12.66239 |
| ATG5      | 0.232473 | 1.174847 | 6.846264 | 6.981334 | 4.24E-10 | 5.00E-09 | 12.65577 |
| NEMF      | 0.373986 | 1.295928 | 7.044286 | 6.980953 | 4.25E-10 | 5.01E-09 | 12.65403 |
| ALDOC     | -0.27977 | 0.823721 | 6.121868 | -6.97894 | 4.29E-10 | 5.05E-09 | 12.64482 |
| NOX5      | -0.22343 | 0.856524 | 5.754945 | -6.97833 | 4.30E-10 | 5.05E-09 | 12.64205 |
| ASPA      | -0.63322 | 0.644735 | 9.251868 | -6.97819 | 4.30E-10 | 5.05E-09 | 12.64139 |
| FIP1L1    | 0.251193 | 1.190191 | 5.617912 | 6.977384 | 4.32E-10 | 5.06E-09 | 12.63773 |
| DBN1      | 0.331681 | 1.258479 | 6.81967  | 6.96874  | 4.50E-10 | 5.26E-09 | 12.59828 |
| ENO3      | -0.34404 | 0.78783  | 5.057912 | -6.9671  | 4.53E-10 | 5.30E-09 | 12.59078 |
| AMBN      | -0.22577 | 0.85514  | 4.448791 | -6.96198 | 4.64E-10 | 5.42E-09 | 12.56742 |
| GHR       | -0.56364 | 0.676594 | 7.557582 | -6.95232 | 4.85E-10 | 5.66E-09 | 12.52338 |
| ESM1      | -0.72445 | 0.605228 | 5.531538 | -6.94877 | 4.93E-10 | 5.75E-09 | 12.50719 |
| COL1A2    | 0.966783 | 1.954477 | 6.713297 | 6.94517  | 5.02E-10 | 5.83E-09 | 12.49078 |
| COMT      | 0.214329 | 1.160164 | 8.160769 | 6.945157 | 5.02E-10 | 5.83E-09 | 12.49072 |
| ITGB3     | 0.492362 | 1.406746 | 5.52978  | 6.943343 | 5.06E-10 | 5.87E-09 | 12.48245 |
| EIF4ENIF1 | 0.276865 | 1.211559 | 6.795824 | 6.943126 | 5.07E-10 | 5.87E-09 | 12.48146 |
| SNX2      | 0.271512 | 1.207072 | 8.712308 | 6.938613 | 5.17E-10 | 5.98E-09 | 12.46089 |
| SOD2      | 0.995744 | 1.994109 | 8.080879 | 6.936775 | 5.22E-10 | 6.03E-09 | 12.45252 |
| ACACA     | 0.293415 | 1.225538 | 6.628791 | 6.936258 | 5.23E-10 | 6.03E-09 | 12.45016 |
| RGS6      | -0.1862  | 0.878916 | 4.998791 | -6.93346 | 5.30E-10 | 6.10E-09 | 12.43743 |
| COPG2IT1  | -0.30954 | 0.806901 | 4.837802 | -6.93337 | 5.30E-10 | 6.10E-09 | 12.43702 |
| PARP6     | -0.2048  | 0.867658 | 7.352637 | -6.93053 | 5.37E-10 | 6.17E-09 | 12.42407 |
| HECW1     | -0.29934 | 0.812622 | 4.841538 | -6.92686 | 5.47E-10 | 6.27E-09 | 12.40735 |
| PHKA2     | -0.20656 | 0.866604 | 6.142857 | -6.92529 | 5.51E-10 | 6.31E-09 | 12.40018 |
| FAM179B   | 0.329488 | 1.256567 | 7.18989  | 6.918773 | 5.68E-10 | 6.49E-09 | 12.37052 |
| ANKRD46   | -0.41813 | 0.748394 | 8.557363 | -6.91577 | 5.76E-10 | 6.58E-09 | 12.35682 |
| SORBS2    | 0.408836 | 1.327614 | 7.70978  | 6.910973 | 5.89E-10 | 6.71E-09 | 12.33501 |
| HLA-J     | 0.497473 | 1.411739 | 8.032308 | 6.906579 | 6.01E-10 | 6.84E-09 | 12.31501 |
| CPNE6     | -0.99234 | 0.502662 | 5.694066 | -6.90293 | 6.11E-10 | 6.95E-09 | 12.29842 |
| UBFD1     | 0.398271 | 1.317927 | 6.209121 | 6.901815 | 6.14E-10 | 6.98E-09 | 12.29334 |
| PRL       | -0.27317 | 0.827497 | 4.842088 | -6.89898 | 6.22E-10 | 7.06E-09 | 12.28044 |
| NUP62     | 0.315271 | 1.244245 | 5.863077 | 6.897951 | 6.25E-10 | 7.08E-09 | 12.27576 |
| TMEM184   | 0.244    | 1.184272 | 6.960659 | 6.8978   | 6.26E-10 | 7.08E-09 | 12.27507 |
| BET1      | 0.268039 | 1.20417  | 7.974286 | 6.895854 | 6.31E-10 | 7.14E-09 | 12.26622 |
| CTNNA1    | 0.232159 | 1.174592 | 9.651978 | 6.895405 | 6.33E-10 | 7.14E-09 | 12.26417 |
| TCF7L1    | -0.31211 | 0.805462 | 5.490659 | -6.89239 | 6.42E-10 | 7.23E-09 | 12.25048 |

|           |          |          |          |          |          |          |          |
|-----------|----------|----------|----------|----------|----------|----------|----------|
| TUSC3     | 0.533705 | 1.447642 | 6.530659 | 6.891487 | 6.44E-10 | 7.24E-09 | 12.24636 |
| TCL6      | -0.22739 | 0.854181 | 4.605165 | -6.89138 | 6.45E-10 | 7.24E-09 | 12.24588 |
| WDR82     | 0.250227 | 1.189394 | 8.563956 | 6.891227 | 6.45E-10 | 7.24E-09 | 12.24517 |
| SHC3      | -0.20443 | 0.867884 | 5.49978  | -6.8904  | 6.48E-10 | 7.26E-09 | 12.24142 |
| C1QL1     | -0.28667 | 0.819794 | 6.188242 | -6.88767 | 6.56E-10 | 7.35E-09 | 12.22899 |
| INPP5J    | -0.38015 | 0.768355 | 6.735055 | -6.8841  | 6.67E-10 | 7.46E-09 | 12.21276 |
| STAU1     | -0.44343 | 0.735384 | 10.66637 | -6.88195 | 6.74E-10 | 7.52E-09 | 12.203   |
| WNT8B     | -0.30744 | 0.808075 | 5.543187 | -6.88182 | 6.74E-10 | 7.52E-09 | 12.20239 |
| CELSR3-AS | -0.243   | 0.844989 | 5.185055 | -6.88102 | 6.77E-10 | 7.54E-09 | 12.19877 |
| GUCY1A3   | 0.500691 | 1.414891 | 7.268681 | 6.879246 | 6.82E-10 | 7.59E-09 | 12.19071 |
| CITED2    | 0.546556 | 1.460594 | 7.185275 | 6.87817  | 6.86E-10 | 7.62E-09 | 12.18581 |
| COMMD8    | 0.287488 | 1.220513 | 9.719121 | 6.877412 | 6.88E-10 | 7.63E-09 | 12.18237 |
| LXN       | 0.409082 | 1.327841 | 7.590989 | 6.873455 | 7.01E-10 | 7.77E-09 | 12.16439 |
| MTMR6     | 0.301874 | 1.232745 | 6.293626 | 6.872714 | 7.03E-10 | 7.78E-09 | 12.16102 |
| SLC28A1   | -0.34982 | 0.784681 | 7.055055 | -6.86835 | 7.18E-10 | 7.92E-09 | 12.1412  |
| FYCO1     | 0.271729 | 1.207254 | 6.552198 | 6.868332 | 7.18E-10 | 7.92E-09 | 12.14111 |
| ZWILCH    | 0.280106 | 1.214284 | 4.783297 | 6.867727 | 7.20E-10 | 7.93E-09 | 12.13837 |
| XDH       | -0.24984 | 0.840989 | 5.373626 | -6.86351 | 7.34E-10 | 8.08E-09 | 12.11919 |
| PPAP2C    | 0.454005 | 1.369838 | 4.814725 | 6.861002 | 7.43E-10 | 8.16E-09 | 12.10782 |
| ABI1      | 0.309942 | 1.239658 | 7.500659 | 6.859908 | 7.46E-10 | 8.20E-09 | 12.10285 |
| CBX3      | 0.352556 | 1.27682  | 7.929341 | 6.859073 | 7.49E-10 | 8.22E-09 | 12.09906 |
| CCDC47    | 0.271589 | 1.207137 | 8.455824 | 6.858194 | 7.52E-10 | 8.24E-09 | 12.09507 |
| CCT2      | 0.26944  | 1.20534  | 9.468022 | 6.854533 | 7.65E-10 | 8.36E-09 | 12.07845 |
| PSMD14    | 0.287444 | 1.220476 | 9.857143 | 6.854477 | 7.66E-10 | 8.36E-09 | 12.0782  |
| SUGCT     | -0.47216 | 0.720882 | 8.759121 | -6.85388 | 7.68E-10 | 8.37E-09 | 12.0755  |
| MPP2      | -0.23021 | 0.852509 | 5.576593 | -6.85232 | 7.73E-10 | 8.42E-09 | 12.0684  |
| RAB11FIP3 | -0.53713 | 0.68914  | 8.183516 | -6.85195 | 7.75E-10 | 8.43E-09 | 12.06672 |
| TBCB      | 0.250198 | 1.18937  | 8.852637 | 6.851164 | 7.77E-10 | 8.45E-09 | 12.06316 |
| CEND1     | -0.23695 | 0.848536 | 6.07     | -6.8501  | 7.81E-10 | 8.48E-09 | 12.05835 |
| ATP1B2    | -0.31087 | 0.806156 | 5.847143 | -6.84901 | 7.85E-10 | 8.51E-09 | 12.05337 |
| THAP1     | 0.357589 | 1.281283 | 5.968352 | 6.848771 | 7.86E-10 | 8.51E-09 | 12.05229 |
| TRPM3     | -0.47432 | 0.719804 | 7.090879 | -6.84845 | 7.87E-10 | 8.51E-09 | 12.05086 |
| MYDGF     | 0.265087 | 1.201708 | 8.21     | 6.848025 | 7.89E-10 | 8.52E-09 | 12.04891 |
| ZMYM6NB   | 0.296937 | 1.228534 | 8.179011 | 6.847308 | 7.91E-10 | 8.53E-09 | 12.04566 |
| SPTLC2    | 0.262208 | 1.199313 | 6.659011 | 6.846969 | 7.93E-10 | 8.54E-09 | 12.04412 |
| NXPE4     | -0.23939 | 0.847105 | 4.659231 | -6.84629 | 7.95E-10 | 8.55E-09 | 12.04105 |
| CA2       | -0.39384 | 0.761101 | 11.30242 | -6.84595 | 7.96E-10 | 8.56E-09 | 12.03951 |
| RGS2      | -0.93674 | 0.522412 | 7.973516 | -6.84238 | 8.10E-10 | 8.69E-09 | 12.02329 |
| WBP5      | 0.320126 | 1.248439 | 9.693956 | 6.841928 | 8.12E-10 | 8.70E-09 | 12.02124 |
| C1orf95   | -0.26502 | 0.832188 | 5.513077 | -6.84094 | 8.15E-10 | 8.72E-09 | 12.01678 |
| SLC38A3   | -0.37648 | 0.770316 | 5.532308 | -6.8402  | 8.18E-10 | 8.73E-09 | 12.01341 |
| CCRN4L    | -0.33216 | 0.794347 | 5.408571 | -6.84014 | 8.18E-10 | 8.73E-09 | 12.01314 |
| PLCB2     | -0.2167  | 0.860534 | 5.801538 | -6.83619 | 8.33E-10 | 8.89E-09 | 11.9952  |
| TAC3      | -0.31342 | 0.804732 | 6.861099 | -6.83526 | 8.37E-10 | 8.91E-09 | 11.99101 |
| ZBED8     | 0.437058 | 1.353841 | 4.573736 | 6.828512 | 8.64E-10 | 9.17E-09 | 11.96039 |
| ADD2      | -0.22576 | 0.855145 | 5.499231 | -6.82851 | 8.64E-10 | 9.17E-09 | 11.96038 |
| KRT4      | -0.26364 | 0.832985 | 5.365934 | -6.8254  | 8.76E-10 | 9.29E-09 | 11.9463  |

|          |          |          |          |          |          |          |          |
|----------|----------|----------|----------|----------|----------|----------|----------|
| BSN      | -0.25605 | 0.837376 | 4.780989 | -6.82472 | 8.79E-10 | 9.31E-09 | 11.94322 |
| NUP43    | 0.355232 | 1.279191 | 6.851099 | 6.823095 | 8.86E-10 | 9.37E-09 | 11.93583 |
| STX3     | 0.436029 | 1.352875 | 7.306923 | 6.821696 | 8.91E-10 | 9.42E-09 | 11.92949 |
| YIPF3    | 0.238309 | 1.179609 | 7.191758 | 6.821043 | 8.94E-10 | 9.44E-09 | 11.92653 |
| MAD2L1   | 0.38458  | 1.305479 | 4.276264 | 6.819176 | 9.02E-10 | 9.51E-09 | 11.91807 |
| BHMT2    | -0.37571 | 0.770723 | 11.41703 | -6.81777 | 9.08E-10 | 9.56E-09 | 11.91169 |
| RRAS     | 0.503135 | 1.41729  | 6.34989  | 6.816005 | 9.15E-10 | 9.62E-09 | 11.9037  |
| DDOST    | 0.241729 | 1.182409 | 10.15736 | 6.812716 | 9.29E-10 | 9.76E-09 | 11.8888  |
| GARS     | 0.321768 | 1.249861 | 9.028681 | 6.811372 | 9.35E-10 | 9.81E-09 | 11.8827  |
| NBN      | 0.279652 | 1.213902 | 6.772637 | 6.810447 | 9.39E-10 | 9.84E-09 | 11.87852 |
| VAMP8    | 0.293923 | 1.225969 | 10.55187 | 6.809918 | 9.42E-10 | 9.85E-09 | 11.87612 |
| NOS1AP   | -0.26388 | 0.832845 | 5.834945 | -6.80932 | 9.44E-10 | 9.87E-09 | 11.8734  |
| GRAMD1B  | -0.58703 | 0.66571  | 7.713187 | -6.80881 | 9.46E-10 | 9.87E-09 | 11.87108 |
| CYB5A    | -0.26971 | 0.829486 | 11.91967 | -6.80868 | 9.47E-10 | 9.87E-09 | 11.87049 |
| SSR1     | 0.251275 | 1.190259 | 7.951648 | 6.807599 | 9.52E-10 | 9.91E-09 | 11.86562 |
| PLTP     | 1.242227 | 2.365634 | 7.494505 | 6.807115 | 9.54E-10 | 9.92E-09 | 11.86342 |
| UBE2C    | 0.680797 | 1.603025 | 5.782527 | 6.805695 | 9.60E-10 | 9.97E-09 | 11.85699 |
| MAP1A    | -0.23629 | 0.848926 | 5.58011  | -6.80363 | 9.69E-10 | 1.01E-08 | 11.84763 |
| CDK8     | 0.261348 | 1.198598 | 5.45989  | 6.798395 | 9.93E-10 | 1.03E-08 | 11.82393 |
| EIF4E2   | 0.343019 | 1.268408 | 8.135495 | 6.797545 | 9.97E-10 | 1.03E-08 | 11.82008 |
| ABCG1    | 0.526614 | 1.440544 | 5.918022 | 6.796297 | 1.00E-09 | 1.04E-08 | 11.81443 |
| MGAT3    | -0.21194 | 0.863374 | 5.207802 | -6.79606 | 1.00E-09 | 1.04E-08 | 11.81334 |
| PTPN12   | 0.318802 | 1.247294 | 5.493736 | 6.795215 | 1.01E-09 | 1.04E-08 | 11.80953 |
| TUBA4B   | 0.375024 | 1.296861 | 6.581538 | 6.794745 | 1.01E-09 | 1.04E-08 | 11.80741 |
| AREL1    | 0.300971 | 1.231973 | 7.122527 | 6.794723 | 1.01E-09 | 1.04E-08 | 11.80731 |
| GLT8D1   | 0.215498 | 1.161104 | 7.743956 | 6.794611 | 1.01E-09 | 1.04E-08 | 11.8068  |
| EIF3J    | 0.240923 | 1.181748 | 6.750659 | 6.793989 | 1.01E-09 | 1.04E-08 | 11.80399 |
| CTBP2    | 0.292024 | 1.224357 | 7.345495 | 6.793886 | 1.01E-09 | 1.04E-08 | 11.80352 |
| LARS2    | 0.348106 | 1.272889 | 7.246923 | 6.793356 | 1.02E-09 | 1.04E-08 | 11.80112 |
| EGR1     | -1.17424 | 0.443117 | 7.078462 | -6.7893  | 1.04E-09 | 1.06E-08 | 11.78275 |
| BIRC2    | 0.249401 | 1.188713 | 9.356374 | 6.788634 | 1.04E-09 | 1.06E-08 | 11.77975 |
| GJB4     | -0.31839 | 0.801964 | 5.634945 | -6.78857 | 1.04E-09 | 1.06E-08 | 11.77948 |
| HERC6    | 0.708812 | 1.634457 | 6.357033 | 6.786745 | 1.05E-09 | 1.07E-08 | 11.7712  |
| PCLO     | 0.296556 | 1.228209 | 5.191648 | 6.785935 | 1.05E-09 | 1.07E-08 | 11.76753 |
| CASP1    | 0.55757  | 1.471788 | 4.986374 | 6.785123 | 1.06E-09 | 1.07E-08 | 11.76386 |
| SPINT1   | 0.335865 | 1.262134 | 7.74     | 6.783912 | 1.06E-09 | 1.08E-08 | 11.75838 |
| MFSD1    | 0.234333 | 1.176363 | 9.520879 | 6.783512 | 1.06E-09 | 1.08E-08 | 11.75657 |
| COPZ2    | -0.28524 | 0.820607 | 7.613297 | -6.78048 | 1.08E-09 | 1.09E-08 | 11.74283 |
| SAC3D1   | 0.353179 | 1.277372 | 5.597692 | 6.779524 | 1.08E-09 | 1.10E-08 | 11.73853 |
| ROCK1    | 0.356169 | 1.280022 | 6.423736 | 6.778335 | 1.09E-09 | 1.10E-08 | 11.73315 |
| STX4     | 0.284551 | 1.218031 | 7.965495 | 6.777071 | 1.10E-09 | 1.11E-08 | 11.72743 |
| KIAA0355 | 0.243517 | 1.183875 | 6.968681 | 6.776848 | 1.10E-09 | 1.11E-08 | 11.72642 |
| SLC25A28 | -0.20111 | 0.86988  | 6.940549 | -6.77317 | 1.12E-09 | 1.12E-08 | 11.70977 |
| SOCS2    | -0.75105 | 0.59417  | 6.711209 | -6.77163 | 1.12E-09 | 1.13E-08 | 11.70281 |
| ADSL     | 0.220647 | 1.165256 | 8.948242 | 6.771107 | 1.13E-09 | 1.13E-08 | 11.70046 |
| BUD31    | 0.287947 | 1.220902 | 8.13     | 6.771055 | 1.13E-09 | 1.13E-08 | 11.70022 |
| SLC43A1  | -0.39221 | 0.761963 | 5.516703 | -6.76885 | 1.14E-09 | 1.14E-08 | 11.69025 |

|          |          |          |          |          |          |          |          |
|----------|----------|----------|----------|----------|----------|----------|----------|
| TEX40    | -0.27613 | 0.825803 | 5.407582 | -6.76817 | 1.14E-09 | 1.14E-08 | 11.68718 |
| AHCY     | -0.43361 | 0.740405 | 10.12297 | -6.76668 | 1.15E-09 | 1.15E-08 | 11.68044 |
| DENND2D  | 0.438792 | 1.355469 | 7.352637 | 6.758578 | 1.19E-09 | 1.19E-08 | 11.64382 |
| RFXANK   | 0.268039 | 1.20417  | 7.194286 | 6.758168 | 1.20E-09 | 1.19E-08 | 11.64197 |
| HARS2    | 0.241072 | 1.181871 | 7.437473 | 6.757617 | 1.20E-09 | 1.19E-08 | 11.63948 |
| PART1    | -0.24864 | 0.841691 | 4.858352 | -6.757   | 1.20E-09 | 1.20E-08 | 11.63671 |
| EEF1E1   | 0.329908 | 1.256933 | 9.139011 | 6.755235 | 1.21E-09 | 1.21E-08 | 11.62872 |
| PROP1    | -0.27635 | 0.825676 | 5.217473 | -6.75463 | 1.22E-09 | 1.21E-08 | 11.626   |
| TRPV1    | -0.2765  | 0.82559  | 5.390659 | -6.75338 | 1.22E-09 | 1.21E-08 | 11.62036 |
| SYN1     | -0.24432 | 0.844214 | 5.154835 | -6.75082 | 1.24E-09 | 1.23E-08 | 11.60879 |
| CCT5     | 0.327275 | 1.254642 | 9.059231 | 6.749299 | 1.25E-09 | 1.23E-08 | 11.6019  |
| YARS     | 0.228628 | 1.17172  | 8.491319 | 6.748496 | 1.25E-09 | 1.24E-08 | 11.59828 |
| DAP3     | 0.219643 | 1.164445 | 9.852527 | 6.746173 | 1.26E-09 | 1.25E-08 | 11.58778 |
| SCRN1    | 0.452454 | 1.368366 | 7.424176 | 6.746112 | 1.27E-09 | 1.25E-08 | 11.58751 |
| DDIT3    | -0.3904  | 0.762918 | 7.648901 | -6.74581 | 1.27E-09 | 1.25E-08 | 11.58612 |
| CAPN1    | 0.272662 | 1.208035 | 6.574615 | 6.744912 | 1.27E-09 | 1.25E-08 | 11.58209 |
| IFT46    | -0.249   | 0.841477 | 7.661648 | -6.74137 | 1.29E-09 | 1.27E-08 | 11.56611 |
| LMAN2    | 0.260169 | 1.197619 | 8.176264 | 6.741295 | 1.29E-09 | 1.27E-08 | 11.56576 |
| HKDC1    | 0.482246 | 1.396917 | 5.06956  | 6.741094 | 1.30E-09 | 1.27E-08 | 11.56485 |
| AMHR2    | -0.25748 | 0.836549 | 5.756154 | -6.741   | 1.30E-09 | 1.27E-08 | 11.56444 |
| UBP1     | 0.275792 | 1.210659 | 7.027033 | 6.740728 | 1.30E-09 | 1.27E-08 | 11.5632  |
| CANT1    | 0.194522 | 1.144345 | 6.75967  | 6.739792 | 1.30E-09 | 1.27E-08 | 11.55897 |
| MPZ      | -0.24685 | 0.842737 | 5.29989  | -6.73694 | 1.32E-09 | 1.29E-08 | 11.54612 |
| TSKU     | -0.66468 | 0.630828 | 8.240659 | -6.73066 | 1.36E-09 | 1.32E-08 | 11.51773 |
| PSMG2    | 0.219874 | 1.164632 | 9.733077 | 6.729224 | 1.37E-09 | 1.33E-08 | 11.51127 |
| ST6GALNA | 0.325652 | 1.253231 | 5.255385 | 6.728039 | 1.38E-09 | 1.34E-08 | 11.50592 |
| MYO7A    | -0.25228 | 0.839568 | 5.472637 | -6.72756 | 1.38E-09 | 1.34E-08 | 11.50378 |
| AACS     | 0.253454 | 1.192058 | 7.260769 | 6.726251 | 1.39E-09 | 1.34E-08 | 11.49786 |
| ATP13A1  | 0.28587  | 1.219145 | 6.875495 | 6.725395 | 1.39E-09 | 1.35E-08 | 11.494   |
| DHRS12   | -0.18901 | 0.877208 | 6.271099 | -6.72343 | 1.41E-09 | 1.36E-08 | 11.48512 |
| HRSP12   | -0.42791 | 0.743336 | 11.82231 | -6.72274 | 1.41E-09 | 1.36E-08 | 11.48202 |
| CTNNA3   | -0.22486 | 0.855675 | 4.78989  | -6.72213 | 1.41E-09 | 1.36E-08 | 11.47925 |
| LRRC23   | -0.31751 | 0.802455 | 6.365165 | -6.72061 | 1.42E-09 | 1.37E-08 | 11.47242 |
| DLGAP2   | -0.27544 | 0.826196 | 4.918791 | -6.7199  | 1.43E-09 | 1.38E-08 | 11.4692  |
| AOC4P    | -0.20733 | 0.86614  | 4.667692 | -6.71814 | 1.44E-09 | 1.38E-08 | 11.46129 |
| CDIPT    | 0.265942 | 1.202421 | 10.8089  | 6.717883 | 1.44E-09 | 1.39E-08 | 11.46011 |
| HLA-E    | 0.430155 | 1.347378 | 9.79967  | 6.715652 | 1.46E-09 | 1.40E-08 | 11.45005 |
| POLR2G   | 0.282362 | 1.216185 | 9.405934 | 6.712598 | 1.48E-09 | 1.42E-08 | 11.43628 |
| F11      | -0.42983 | 0.742351 | 6.825275 | -6.71214 | 1.48E-09 | 1.42E-08 | 11.43423 |
| STK24    | 0.172546 | 1.127046 | 9.97989  | 6.711198 | 1.49E-09 | 1.42E-08 | 11.42996 |
| ZCWPW1   | -0.20371 | 0.868318 | 6.182527 | -6.71072 | 1.49E-09 | 1.42E-08 | 11.42783 |
| SGK1     | -0.70613 | 0.612962 | 10.63495 | -6.7104  | 1.49E-09 | 1.42E-08 | 11.42636 |
| SGMS1    | 0.443459 | 1.359861 | 6.284945 | 6.705209 | 1.53E-09 | 1.46E-08 | 11.40297 |
| SLFN12   | 0.347092 | 1.271994 | 4.480769 | 6.702895 | 1.55E-09 | 1.47E-08 | 11.39254 |
| NDC1     | 0.259454 | 1.197026 | 5.243736 | 6.701941 | 1.55E-09 | 1.48E-08 | 11.38824 |
| NET1     | -0.46073 | 0.726619 | 8.439341 | -6.70147 | 1.56E-09 | 1.48E-08 | 11.38614 |
| ALDH3B1  | -0.26754 | 0.830737 | 6.658571 | -6.70062 | 1.56E-09 | 1.48E-08 | 11.3823  |

|          |          |          |          |          |          |          |          |
|----------|----------|----------|----------|----------|----------|----------|----------|
| CACNA1F  | -0.28051 | 0.823301 | 5.698462 | -6.70061 | 1.56E-09 | 1.48E-08 | 11.38225 |
| RRM2     | 1.041217 | 2.057963 | 4.87967  | 6.700323 | 1.56E-09 | 1.48E-08 | 11.38095 |
| RNF7     | 0.282372 | 1.216193 | 7.076374 | 6.697323 | 1.59E-09 | 1.50E-08 | 11.36743 |
| ASB9     | -0.67697 | 0.625477 | 7.061538 | -6.6884  | 1.65E-09 | 1.56E-08 | 11.32725 |
| ARHGAP28 | -0.25207 | 0.839689 | 4.482088 | -6.68831 | 1.65E-09 | 1.56E-08 | 11.32685 |
| ZC3H7A   | 0.301507 | 1.232431 | 6.386923 | 6.685366 | 1.68E-09 | 1.58E-08 | 11.31359 |
| TRIM22   | 0.820372 | 1.765861 | 7.522418 | 6.68476  | 1.68E-09 | 1.58E-08 | 11.31085 |
| TRIM5    | 0.285986 | 1.219243 | 4.360769 | 6.681621 | 1.70E-09 | 1.60E-08 | 11.29672 |
| STK19    | 0.706227 | 1.631532 | 7.599451 | 6.680489 | 1.71E-09 | 1.61E-08 | 11.29163 |
| MANF     | 0.416232 | 1.334438 | 9.306264 | 6.679791 | 1.72E-09 | 1.61E-08 | 11.28849 |
| GORASP2  | 0.218952 | 1.163888 | 8.291099 | 6.679232 | 1.72E-09 | 1.62E-08 | 11.28597 |
| MPHOSPH  | 0.220812 | 1.165389 | 8.155714 | 6.675376 | 1.75E-09 | 1.64E-08 | 11.26862 |
| ALG9     | 0.24814  | 1.187675 | 6.709011 | 6.67432  | 1.76E-09 | 1.65E-08 | 11.26387 |
| PARD3    | 0.246184 | 1.186065 | 7.33     | 6.674317 | 1.76E-09 | 1.65E-08 | 11.26385 |
| OPN3     | 0.28628  | 1.219492 | 7.964176 | 6.671746 | 1.78E-09 | 1.66E-08 | 11.25229 |
| STK39    | 0.402609 | 1.321896 | 5.506484 | 6.671671 | 1.78E-09 | 1.66E-08 | 11.25195 |
| ZNHIT6   | 0.273575 | 1.208799 | 5.716154 | 6.669293 | 1.80E-09 | 1.68E-08 | 11.24125 |
| GNG7     | -0.24477 | 0.843951 | 6.334396 | -6.66904 | 1.81E-09 | 1.68E-08 | 11.24012 |
| GBAS     | 0.360242 | 1.283641 | 8.609011 | 6.668543 | 1.81E-09 | 1.68E-08 | 11.23787 |
| MED7     | 0.223802 | 1.167807 | 7.011758 | 6.667527 | 1.82E-09 | 1.69E-08 | 11.2333  |
| S100A1   | 0.674966 | 1.596559 | 7.687253 | 6.666156 | 1.83E-09 | 1.70E-08 | 11.22714 |
| PRKCD    | -0.38241 | 0.767155 | 6.252418 | -6.66601 | 1.83E-09 | 1.70E-08 | 11.22648 |
| NPFFR1   | -0.23    | 0.852635 | 5.586264 | -6.66048 | 1.88E-09 | 1.74E-08 | 11.20161 |
| BAG5     | 0.227333 | 1.170669 | 7.392418 | 6.658669 | 1.89E-09 | 1.75E-08 | 11.19347 |
| MAST2    | -0.20159 | 0.869589 | 6.318571 | -6.65849 | 1.90E-09 | 1.75E-08 | 11.19265 |
| SDF2L1   | 0.432536 | 1.349604 | 7.948022 | 6.655638 | 1.92E-09 | 1.77E-08 | 11.17984 |
| HCCS     | 0.219164 | 1.164059 | 7.730769 | 6.655049 | 1.93E-09 | 1.77E-08 | 11.17719 |
| PIGN     | 0.268749 | 1.204763 | 5.956593 | 6.65352  | 1.94E-09 | 1.78E-08 | 11.17032 |
| OSMR     | 0.615097 | 1.531661 | 5.213516 | 6.652908 | 1.95E-09 | 1.79E-08 | 11.16757 |
| SSTR2    | -0.37389 | 0.7717   | 5.09011  | -6.64966 | 1.97E-09 | 1.81E-08 | 11.15296 |
| BTNL3    | -0.28005 | 0.823563 | 6.439341 | -6.64946 | 1.98E-09 | 1.81E-08 | 11.15209 |
| SMC4     | 0.363657 | 1.286683 | 5.604396 | 6.648868 | 1.98E-09 | 1.82E-08 | 11.14941 |
| DEFB1    | -0.64568 | 0.639191 | 12.00505 | -6.64784 | 1.99E-09 | 1.82E-08 | 11.14477 |
| TMEM251  | 0.297633 | 1.229126 | 7.700659 | 6.646321 | 2.01E-09 | 1.83E-08 | 11.13797 |
| CLPS     | -0.24273 | 0.845145 | 4.557143 | -6.6452  | 2.02E-09 | 1.84E-08 | 11.13294 |
| CNPY2    | 0.182304 | 1.134695 | 8.923846 | 6.642437 | 2.04E-09 | 1.86E-08 | 11.12052 |
| EMC8     | 0.24185  | 1.182508 | 7.842857 | 6.64078  | 2.06E-09 | 1.87E-08 | 11.11307 |
| INSR     | -0.32797 | 0.796659 | 7.559341 | -6.64022 | 2.06E-09 | 1.88E-08 | 11.11057 |
| RASL10A  | -0.23328 | 0.850701 | 5.337253 | -6.63821 | 2.08E-09 | 1.89E-08 | 11.10152 |
| NAT10    | 0.232725 | 1.175052 | 6.957692 | 6.636191 | 2.10E-09 | 1.91E-08 | 11.09246 |
| OCA2     | -0.24594 | 0.843265 | 6.010989 | -6.6314  | 2.15E-09 | 1.95E-08 | 11.07094 |
| KRT81    | -0.2623  | 0.833755 | 5.706593 | -6.62952 | 2.17E-09 | 1.96E-08 | 11.06251 |
| RPGRIP1L | 0.256585 | 1.194647 | 4.093187 | 6.627056 | 2.19E-09 | 1.98E-08 | 11.05144 |
| SENP2    | -0.23665 | 0.848715 | 6.963846 | -6.62704 | 2.19E-09 | 1.98E-08 | 11.05137 |
| TMCO3    | 0.383155 | 1.30419  | 6.511429 | 6.626135 | 2.20E-09 | 1.99E-08 | 11.04731 |
| PIBF1    | 0.329483 | 1.256563 | 5.13967  | 6.625569 | 2.21E-09 | 1.99E-08 | 11.04477 |
| PLA1A    | 0.548314 | 1.462376 | 7.055275 | 6.625293 | 2.21E-09 | 1.99E-08 | 11.04353 |

|          |          |          |          |          |          |          |          |
|----------|----------|----------|----------|----------|----------|----------|----------|
| LARP7    | 0.297763 | 1.229237 | 7.596593 | 6.624407 | 2.22E-09 | 2.00E-08 | 11.03956 |
| APOBEC3B | 0.936058 | 1.913293 | 4.585495 | 6.623425 | 2.23E-09 | 2.00E-08 | 11.03515 |
| S100A4   | 0.675159 | 1.596773 | 7.746044 | 6.62325  | 2.23E-09 | 2.00E-08 | 11.03437 |
| NUP133   | 0.239903 | 1.180914 | 7.254286 | 6.623107 | 2.23E-09 | 2.00E-08 | 11.03372 |
| QPCTL    | -0.18785 | 0.877913 | 4.263846 | -6.62235 | 2.24E-09 | 2.01E-08 | 11.03033 |
| CD81     | 0.349338 | 1.273976 | 10.19297 | 6.619777 | 2.27E-09 | 2.03E-08 | 11.01878 |
| CDKN1C   | -0.47563 | 0.719151 | 8.321319 | -6.61888 | 2.28E-09 | 2.04E-08 | 11.01478 |
| MSH2     | 0.355522 | 1.279448 | 5.454286 | 6.617726 | 2.29E-09 | 2.04E-08 | 11.00958 |
| SLC35A5  | 0.261517 | 1.198738 | 7.147582 | 6.616996 | 2.30E-09 | 2.05E-08 | 11.0063  |
| BEST1    | -0.26299 | 0.833362 | 5.425604 | -6.61565 | 2.31E-09 | 2.06E-08 | 11.00024 |
| VRK2     | 0.25985  | 1.197354 | 7.051758 | 6.615097 | 2.32E-09 | 2.06E-08 | 10.99778 |
| ALOXE3   | -0.17763 | 0.884153 | 4.558681 | -6.61477 | 2.32E-09 | 2.06E-08 | 10.99634 |
| WIF1     | -0.33781 | 0.791241 | 4.121429 | -6.61209 | 2.35E-09 | 2.09E-08 | 10.98428 |
| SEC61B   | 0.219903 | 1.164656 | 10.9944  | 6.611078 | 2.36E-09 | 2.09E-08 | 10.97976 |
| ANXA1    | 0.815242 | 1.759593 | 7.219011 | 6.610988 | 2.36E-09 | 2.09E-08 | 10.97935 |
| FRMPD4   | -0.19983 | 0.870656 | 4.539011 | -6.61023 | 2.37E-09 | 2.10E-08 | 10.97597 |
| RC3H2    | 0.193295 | 1.143372 | 6.233846 | 6.609708 | 2.37E-09 | 2.10E-08 | 10.97361 |
| EDF1     | 0.216527 | 1.161933 | 9.510769 | 6.609056 | 2.38E-09 | 2.11E-08 | 10.97069 |
| CSTF2T   | 0.262068 | 1.199196 | 6.502637 | 6.606489 | 2.41E-09 | 2.13E-08 | 10.95918 |
| DHX40    | 0.304353 | 1.234864 | 7.966374 | 6.605982 | 2.41E-09 | 2.13E-08 | 10.9569  |
| REV3L    | 0.307188 | 1.237294 | 5.805385 | 6.605197 | 2.42E-09 | 2.14E-08 | 10.95338 |
| OR10H3   | -0.2921  | 0.816714 | 4.511209 | -6.60393 | 2.44E-09 | 2.15E-08 | 10.94773 |
| LOXL1    | 0.606367 | 1.522421 | 5.676374 | 6.603038 | 2.45E-09 | 2.15E-08 | 10.9437  |
| ZNF468   | 0.346879 | 1.271807 | 5.471099 | 6.601353 | 2.47E-09 | 2.17E-08 | 10.93615 |
| ASS1     | -0.48231 | 0.715831 | 12.43758 | -6.59847 | 2.50E-09 | 2.19E-08 | 10.92321 |
| PRSS3    | -0.52646 | 0.694257 | 6.749011 | -6.59569 | 2.53E-09 | 2.22E-08 | 10.91078 |
| RBM12    | 0.281507 | 1.215464 | 6.267033 | 6.594287 | 2.55E-09 | 2.23E-08 | 10.90448 |
| BAIAP3   | -0.22061 | 0.858203 | 6.543516 | -6.59225 | 2.57E-09 | 2.25E-08 | 10.89536 |
| ACTL8    | -0.30285 | 0.810652 | 6.712198 | -6.59126 | 2.58E-09 | 2.26E-08 | 10.89091 |
| PPT1     | 0.266599 | 1.202969 | 9.838791 | 6.585172 | 2.66E-09 | 2.32E-08 | 10.86365 |
| SPOCK2   | -0.39502 | 0.760477 | 6.688571 | -6.5824  | 2.69E-09 | 2.35E-08 | 10.85122 |
| LY75     | 0.820633 | 1.766181 | 5.184286 | 6.581058 | 2.71E-09 | 2.36E-08 | 10.84522 |
| HPSE2    | -0.28094 | 0.823053 | 5.078681 | -6.57851 | 2.74E-09 | 2.38E-08 | 10.83384 |
| PNMA3    | -0.25845 | 0.835986 | 5.501978 | -6.57778 | 2.75E-09 | 2.39E-08 | 10.83055 |
| UBE2J1   | 0.230976 | 1.173629 | 6.438132 | 6.577733 | 2.75E-09 | 2.39E-08 | 10.83034 |
| GK       | -0.53117 | 0.691991 | 8.864505 | -6.57414 | 2.79E-09 | 2.43E-08 | 10.81425 |
| CTSD     | 0.421256 | 1.339093 | 8.494835 | 6.573279 | 2.81E-09 | 2.43E-08 | 10.8104  |
| UCHL1    | 0.74358  | 1.674325 | 8.808791 | 6.571891 | 2.82E-09 | 2.45E-08 | 10.80419 |
| FGFBP1   | -0.26503 | 0.832179 | 5.972418 | -6.56579 | 2.90E-09 | 2.51E-08 | 10.77689 |
| PDCD10   | 0.253894 | 1.192421 | 9.850769 | 6.565294 | 2.91E-09 | 2.52E-08 | 10.77467 |
| MTIF2    | 0.252778 | 1.191499 | 8.1      | 6.56465  | 2.92E-09 | 2.52E-08 | 10.77179 |
| CLIC5    | -0.74978 | 0.594693 | 6.419011 | -6.56371 | 2.93E-09 | 2.53E-08 | 10.7676  |
| TNS4     | -0.24897 | 0.841496 | 5.573187 | -6.56362 | 2.93E-09 | 2.53E-08 | 10.76717 |
| RAB3A    | -0.20769 | 0.865925 | 5.161429 | -6.56321 | 2.94E-09 | 2.53E-08 | 10.76533 |
| EED      | 0.237401 | 1.178867 | 4.61044  | 6.561195 | 2.97E-09 | 2.55E-08 | 10.75633 |
| ERMP1    | 0.322792 | 1.250749 | 8.435275 | 6.560069 | 2.98E-09 | 2.56E-08 | 10.7513  |
| ZNF358   | -0.2719  | 0.828226 | 6.17989  | -6.55985 | 2.98E-09 | 2.56E-08 | 10.7503  |



|          |          |          |          |          |          |          |          |
|----------|----------|----------|----------|----------|----------|----------|----------|
| MAVS     | 0.299068 | 1.230349 | 6.055934 | 6.557315 | 3.02E-09 | 2.59E-08 | 10.73898 |
| RNF208   | -0.26234 | 0.833733 | 5.574835 | -6.55452 | 3.06E-09 | 2.62E-08 | 10.72647 |
| PLA2G3   | -0.22835 | 0.853609 | 5.241209 | -6.55313 | 3.08E-09 | 2.63E-08 | 10.72028 |
| LRRC15   | -0.19576 | 0.873114 | 5.374066 | -6.55088 | 3.11E-09 | 2.66E-08 | 10.71021 |
| GSTP1    | 0.480111 | 1.394851 | 9.082418 | 6.546255 | 3.18E-09 | 2.71E-08 | 10.68954 |
| ICE1     | 0.304188 | 1.234724 | 7.578901 | 6.546012 | 3.18E-09 | 2.71E-08 | 10.68845 |
| LY96     | 0.951029 | 1.933251 | 5.026593 | 6.545037 | 3.19E-09 | 2.72E-08 | 10.68409 |
| XPOT     | 0.263643 | 1.200506 | 8.034286 | 6.541093 | 3.25E-09 | 2.77E-08 | 10.66647 |
| CECR1    | 0.763459 | 1.697556 | 7.443187 | 6.532449 | 3.38E-09 | 2.88E-08 | 10.62786 |
| CSNK2A1  | 0.181459 | 1.13403  | 7.665385 | 6.532117 | 3.39E-09 | 2.88E-08 | 10.62638 |
| HAP1     | -0.1706  | 0.888471 | 5.878462 | -6.53104 | 3.41E-09 | 2.89E-08 | 10.62155 |
| EFTUD1   | 0.231705 | 1.174222 | 7.361319 | 6.530169 | 3.42E-09 | 2.90E-08 | 10.61767 |
| PAK3     | -0.26063 | 0.834724 | 5.172857 | -6.52689 | 3.47E-09 | 2.94E-08 | 10.60302 |
| GLI1     | -0.24892 | 0.841527 | 5.535604 | -6.52608 | 3.48E-09 | 2.95E-08 | 10.59941 |
| DUSP2    | -0.30726 | 0.808177 | 5.191538 | -6.52546 | 3.49E-09 | 2.95E-08 | 10.59666 |
| YEATS2   | 0.272198 | 1.207646 | 5.213516 | 6.52345  | 3.53E-09 | 2.98E-08 | 10.58768 |
| DIP2C    | -0.4853  | 0.714349 | 8.421538 | -6.5231  | 3.53E-09 | 2.98E-08 | 10.5861  |
| MLEC     | 0.292159 | 1.224472 | 8.761648 | 6.519401 | 3.59E-09 | 3.03E-08 | 10.56961 |
| CDC23    | 0.296676 | 1.228311 | 7.347143 | 6.517858 | 3.62E-09 | 3.05E-08 | 10.56272 |
| DCAF6    | 0.252353 | 1.191148 | 7.710659 | 6.517368 | 3.62E-09 | 3.05E-08 | 10.56054 |
| EXTL1    | -0.20463 | 0.867762 | 4.770549 | -6.51676 | 3.64E-09 | 3.05E-08 | 10.55781 |
| SYNGR2   | 0.28056  | 1.214667 | 8.833956 | 6.516346 | 3.64E-09 | 3.06E-08 | 10.55598 |
| POLR2L   | 0.206097 | 1.153563 | 7.406264 | 6.515168 | 3.66E-09 | 3.07E-08 | 10.55072 |
| RPS19    | 0.284087 | 1.217639 | 12.8444  | 6.514903 | 3.67E-09 | 3.07E-08 | 10.54954 |
| CTSS     | 0.780242 | 1.717418 | 5.176703 | 6.511397 | 3.73E-09 | 3.12E-08 | 10.5339  |
| COMMD3   | 0.286783 | 1.219917 | 8.997033 | 6.511248 | 3.73E-09 | 3.12E-08 | 10.53324 |
| SERPINA3 | 1.787966 | 3.453277 | 8.262637 | 6.510949 | 3.73E-09 | 3.12E-08 | 10.5319  |
| SMARCAL1 | 0.279271 | 1.213581 | 6.445275 | 6.510696 | 3.74E-09 | 3.12E-08 | 10.53077 |
| ITGB8    | 0.379836 | 1.301194 | 4.68044  | 6.508463 | 3.78E-09 | 3.14E-08 | 10.52081 |
| PCNA     | 0.357517 | 1.281219 | 8.755055 | 6.508458 | 3.78E-09 | 3.14E-08 | 10.52079 |
| ADIRF    | -0.8808  | 0.543067 | 9.848571 | -6.5052  | 3.83E-09 | 3.19E-08 | 10.50625 |
| RHOA     | 0.279348 | 1.213646 | 10.85879 | 6.504066 | 3.85E-09 | 3.20E-08 | 10.50121 |
| M6PR     | 0.317217 | 1.245925 | 8.111648 | 6.503065 | 3.87E-09 | 3.21E-08 | 10.49674 |
| TRIM44   | 0.230435 | 1.173188 | 8.553516 | 6.500223 | 3.92E-09 | 3.25E-08 | 10.48408 |
| POLD3    | -0.54137 | 0.687119 | 7.560769 | -6.49919 | 3.94E-09 | 3.26E-08 | 10.47946 |
| CDX1     | -0.23068 | 0.852232 | 6.605275 | -6.4979  | 3.96E-09 | 3.28E-08 | 10.47371 |
| SLC30A5  | 0.223271 | 1.167377 | 7.067582 | 6.497402 | 3.97E-09 | 3.29E-08 | 10.4715  |
| CKAP2    | 0.282488 | 1.216291 | 4.601648 | 6.496622 | 3.99E-09 | 3.29E-08 | 10.46802 |
| ITIH4    | -0.23216 | 0.85136  | 5.318022 | -6.49541 | 4.01E-09 | 3.31E-08 | 10.46264 |
| FRK      | 0.33286  | 1.259508 | 5.123297 | 6.494396 | 4.03E-09 | 3.32E-08 | 10.4581  |
| ZNF573   | 0.335126 | 1.261487 | 5.036374 | 6.493466 | 4.04E-09 | 3.33E-08 | 10.45396 |
| MIR22HG  | -0.57666 | 0.670516 | 8.495275 | -6.49046 | 4.10E-09 | 3.37E-08 | 10.44058 |
| IFT52    | 0.238029 | 1.17938  | 7.879011 | 6.490223 | 4.10E-09 | 3.37E-08 | 10.43951 |
| SYT2     | -0.25651 | 0.837109 | 6.62011  | -6.49016 | 4.11E-09 | 3.37E-08 | 10.43923 |
| EPCAM    | 0.289435 | 1.222161 | 10.32769 | 6.490083 | 4.11E-09 | 3.37E-08 | 10.43888 |
| IFI35    | 0.466628 | 1.381876 | 7.419011 | 6.48878  | 4.13E-09 | 3.39E-08 | 10.43308 |
| LGALS1   | 0.852159 | 1.805201 | 8.508571 | 6.484886 | 4.21E-09 | 3.44E-08 | 10.41574 |

|         |          |          |          |          |          |          |          |
|---------|----------|----------|----------|----------|----------|----------|----------|
| ENO1    | 0.293333 | 1.225468 | 10.64505 | 6.483898 | 4.22E-09 | 3.46E-08 | 10.41133 |
| EIF3A   | 0.226237 | 1.16978  | 8.632527 | 6.4818   | 4.26E-09 | 3.49E-08 | 10.40199 |
| RDH16   | -0.25588 | 0.837477 | 5.888901 | -6.47653 | 4.37E-09 | 3.57E-08 | 10.37852 |
| KIF21B  | -0.23748 | 0.848227 | 5.496044 | -6.47643 | 4.37E-09 | 3.57E-08 | 10.37809 |
| CCBL1   | -0.26891 | 0.829945 | 6.905934 | -6.4759  | 4.38E-09 | 3.57E-08 | 10.37572 |
| PCK1    | -0.82076 | 0.566142 | 11.98978 | -6.47347 | 4.43E-09 | 3.61E-08 | 10.36491 |
| CRNN    | -0.21705 | 0.860324 | 4.825495 | -6.47302 | 4.44E-09 | 3.61E-08 | 10.36291 |
| C5orf28 | 0.285271 | 1.218639 | 5.258242 | 6.472435 | 4.45E-09 | 3.62E-08 | 10.3603  |
| WAPAL   | 0.279319 | 1.213622 | 7.067473 | 6.471588 | 4.47E-09 | 3.63E-08 | 10.35653 |
| FADS3   | 0.394126 | 1.314146 | 6.230549 | 6.468565 | 4.53E-09 | 3.68E-08 | 10.34308 |
| SLC22A8 | -0.89372 | 0.538225 | 10.11066 | -6.46703 | 4.56E-09 | 3.70E-08 | 10.33625 |
| VRK3    | 0.245556 | 1.185549 | 7.951429 | 6.464299 | 4.62E-09 | 3.74E-08 | 10.3241  |
| CSE1L   | 0.257976 | 1.1958   | 7.846484 | 6.463238 | 4.64E-09 | 3.76E-08 | 10.31938 |
| LYN     | 0.456638 | 1.37234  | 5.644505 | 6.462315 | 4.66E-09 | 3.77E-08 | 10.31527 |
| IMPDH1  | 0.39401  | 1.31404  | 7.445275 | 6.459083 | 4.73E-09 | 3.82E-08 | 10.3009  |
| DIO3    | -0.21116 | 0.86384  | 5.823187 | -6.45717 | 4.77E-09 | 3.85E-08 | 10.29241 |
| TEAD4   | 0.389696 | 1.310117 | 6.159011 | 6.456992 | 4.78E-09 | 3.85E-08 | 10.2916  |
| MED17   | 0.308386 | 1.238322 | 6.28989  | 6.454904 | 4.82E-09 | 3.88E-08 | 10.28231 |
| NEU3    | -0.18946 | 0.876935 | 5.210659 | -6.45402 | 4.84E-09 | 3.89E-08 | 10.27837 |
| RPA3    | -0.27269 | 0.827774 | 9.174066 | -6.45339 | 4.86E-09 | 3.90E-08 | 10.2756  |
| RORC    | -0.53629 | 0.689544 | 7.121978 | -6.45316 | 4.86E-09 | 3.90E-08 | 10.27457 |
| SEC23B  | 0.231271 | 1.173868 | 7.991538 | 6.451142 | 4.91E-09 | 3.93E-08 | 10.26559 |
| SMAGP   | 0.404391 | 1.32353  | 6.707582 | 6.450088 | 4.93E-09 | 3.95E-08 | 10.2609  |
| EPM2A   | -0.25761 | 0.836473 | 6.04022  | -6.44924 | 4.95E-09 | 3.96E-08 | 10.25714 |
| PPP6R2  | -0.21503 | 0.861526 | 6.117143 | -6.44767 | 4.98E-09 | 3.99E-08 | 10.25014 |
| PALM    | -0.38109 | 0.767859 | 7.432637 | -6.44609 | 5.02E-09 | 4.01E-08 | 10.24314 |
| IFITM1  | 0.893454 | 1.857618 | 8.807253 | 6.446053 | 5.02E-09 | 4.01E-08 | 10.24297 |
| CFAP45  | -0.24979 | 0.84102  | 6.286044 | -6.44492 | 5.05E-09 | 4.02E-08 | 10.23793 |
| SMCP    | -0.22562 | 0.855226 | 5.635385 | -6.44472 | 5.05E-09 | 4.02E-08 | 10.23705 |
| UTP6    | 0.291232 | 1.223685 | 7.599451 | 6.443882 | 5.07E-09 | 4.04E-08 | 10.23332 |
| CASP10  | -0.17963 | 0.882931 | 5.877912 | -6.44324 | 5.09E-09 | 4.04E-08 | 10.23048 |
| YRDC    | -0.26237 | 0.833716 | 7.063516 | -6.44214 | 5.11E-09 | 4.06E-08 | 10.2256  |
| CHST8   | -0.24465 | 0.844022 | 5.51989  | -6.43817 | 5.20E-09 | 4.13E-08 | 10.20794 |
| DERL1   | 0.210498 | 1.157087 | 7.206484 | 6.435804 | 5.26E-09 | 4.17E-08 | 10.19744 |
| HGSNAT  | 0.215087 | 1.160774 | 7.335275 | 6.43414  | 5.30E-09 | 4.20E-08 | 10.19005 |
| UGT8    | 0.52313  | 1.43707  | 6.29956  | 6.43099  | 5.38E-09 | 4.26E-08 | 10.17606 |
| P4HA1   | -0.61471 | 0.653059 | 8.093846 | -6.4303  | 5.39E-09 | 4.27E-08 | 10.17301 |
| CAPZA2  | 0.265024 | 1.201656 | 9.157143 | 6.428774 | 5.43E-09 | 4.29E-08 | 10.16623 |
| PTPRT   | -0.27865 | 0.824364 | 5.383077 | -6.42797 | 5.45E-09 | 4.30E-08 | 10.16266 |
| MPZL1   | 0.25901  | 1.196657 | 6.883516 | 6.421185 | 5.62E-09 | 4.43E-08 | 10.13254 |
| PBK     | 0.692932 | 1.616566 | 3.964615 | 6.421069 | 5.63E-09 | 4.43E-08 | 10.13202 |
| ITGAV   | 0.474174 | 1.389123 | 9.262308 | 6.420118 | 5.65E-09 | 4.45E-08 | 10.12781 |
| MINA    | 0.238019 | 1.179372 | 6.528571 | 6.419403 | 5.67E-09 | 4.46E-08 | 10.12464 |
| CSHL1   | -0.31492 | 0.803894 | 5.412747 | -6.41673 | 5.74E-09 | 4.51E-08 | 10.11276 |
| PRRG1   | 0.463609 | 1.378987 | 6.911648 | 6.415574 | 5.77E-09 | 4.53E-08 | 10.10765 |
| UBA6    | 0.31644  | 1.245254 | 5.506264 | 6.415459 | 5.77E-09 | 4.53E-08 | 10.10714 |
| EPX     | -0.24327 | 0.844831 | 5.492747 | -6.41266 | 5.85E-09 | 4.58E-08 | 10.09473 |

|          |          |          |          |          |          |          |          |
|----------|----------|----------|----------|----------|----------|----------|----------|
| CYP3A7   | -0.93387 | 0.523452 | 6.964066 | -6.41071 | 5.90E-09 | 4.62E-08 | 10.08609 |
| ST13     | -0.25329 | 0.838978 | 10.61648 | -6.41041 | 5.91E-09 | 4.62E-08 | 10.08476 |
| PSMA3    | 0.261193 | 1.19847  | 9.242857 | 6.409902 | 5.92E-09 | 4.62E-08 | 10.08249 |
| AP1G1    | 0.287232 | 1.220297 | 7.617473 | 6.408385 | 5.96E-09 | 4.65E-08 | 10.07576 |
| CADM3    | -0.15313 | 0.899297 | 5.003407 | -6.40263 | 6.12E-09 | 4.77E-08 | 10.05026 |
| AATK     | -0.23787 | 0.847997 | 6.948242 | -6.3991  | 6.22E-09 | 4.84E-08 | 10.03463 |
| MGLL     | 0.491725 | 1.406125 | 8.910769 | 6.398498 | 6.23E-09 | 4.85E-08 | 10.03194 |
| RAB8B    | 0.302599 | 1.233364 | 6.676593 | 6.395824 | 6.31E-09 | 4.90E-08 | 10.02009 |
| HOXC13   | -0.23049 | 0.852347 | 4.604066 | -6.39578 | 6.31E-09 | 4.90E-08 | 10.01991 |
| PPP1R15A | -0.38157 | 0.767604 | 5.920879 | -6.39418 | 6.36E-09 | 4.94E-08 | 10.0128  |
| PRKCDBP  | 0.384715 | 1.305602 | 5.842418 | 6.391962 | 6.42E-09 | 4.98E-08 | 10.00298 |
| LILRB3   | -0.24211 | 0.845507 | 8.915275 | -6.38872 | 6.52E-09 | 5.05E-08 | 9.988623 |
| IFRD1    | -0.40406 | 0.75573  | 5.847582 | -6.38868 | 6.52E-09 | 5.05E-08 | 9.98843  |
| PARP8    | 0.275232 | 1.210189 | 5.971538 | 6.38708  | 6.57E-09 | 5.08E-08 | 9.981354 |
| DMWD     | -0.20195 | 0.869374 | 6.552308 | -6.38631 | 6.59E-09 | 5.09E-08 | 9.977937 |
| RIC8A    | 0.196444 | 1.145871 | 8.177143 | 6.385092 | 6.63E-09 | 5.12E-08 | 9.972553 |
| HSPA5    | 0.463106 | 1.378507 | 9.768791 | 6.382119 | 6.72E-09 | 5.18E-08 | 9.959389 |
| MC1R     | -0.28397 | 0.82133  | 5.581099 | -6.38186 | 6.72E-09 | 5.18E-08 | 9.958225 |
| PHTF1    | 0.228512 | 1.171626 | 4.966044 | 6.380007 | 6.78E-09 | 5.22E-08 | 9.950039 |
| KIR3DX1  | -0.35109 | 0.783991 | 5.587253 | -6.37958 | 6.79E-09 | 5.23E-08 | 9.948144 |
| TEF      | -0.25899 | 0.835675 | 5.327582 | -6.37793 | 6.85E-09 | 5.26E-08 | 9.940853 |
| TMEM43   | 0.246111 | 1.186006 | 8.236703 | 6.377865 | 6.85E-09 | 5.26E-08 | 9.940558 |
| TLR2     | 0.461473 | 1.376947 | 5.694505 | 6.377234 | 6.87E-09 | 5.27E-08 | 9.937767 |
| PLGRKT   | 0.260942 | 1.198261 | 8.651429 | 6.374423 | 6.95E-09 | 5.33E-08 | 9.925324 |
| FHL2     | 0.669874 | 1.590934 | 7.295604 | 6.373492 | 6.98E-09 | 5.35E-08 | 9.921207 |
| PCK2     | -0.65886 | 0.633379 | 10.23549 | -6.37252 | 7.02E-09 | 5.37E-08 | 9.916912 |
| ELAVL3   | -0.22142 | 0.857721 | 5.286593 | -6.37229 | 7.02E-09 | 5.37E-08 | 9.915883 |
| VPS13C   | 0.306256 | 1.236495 | 7.592967 | 6.370281 | 7.09E-09 | 5.41E-08 | 9.907001 |
| NPPA     | -0.28297 | 0.821897 | 6.076374 | -6.37009 | 7.09E-09 | 5.41E-08 | 9.906156 |
| POLR2E   | 0.252227 | 1.191044 | 8.934945 | 6.369283 | 7.12E-09 | 5.43E-08 | 9.902586 |
| EXOSC10  | 0.326314 | 1.253806 | 5.675495 | 6.368285 | 7.15E-09 | 5.45E-08 | 9.89817  |
| MARCKS   | 0.442609 | 1.35906  | 5.336264 | 6.367752 | 7.17E-09 | 5.46E-08 | 9.895814 |
| SPDEF    | -0.24261 | 0.845216 | 6.922637 | -6.36617 | 7.22E-09 | 5.49E-08 | 9.888824 |
| IFITM2   | 0.70329  | 1.628213 | 9.135824 | 6.363729 | 7.30E-09 | 5.55E-08 | 9.878021 |
| GPX5     | -0.17553 | 0.885444 | 4.214505 | -6.36078 | 7.40E-09 | 5.62E-08 | 9.864966 |
| ALDH1L1  | -0.47561 | 0.719161 | 9.842198 | -6.35978 | 7.43E-09 | 5.64E-08 | 9.860572 |
| PARP1    | 0.223319 | 1.167416 | 7.84978  | 6.359262 | 7.45E-09 | 5.64E-08 | 9.858269 |
| ALLC     | -0.31913 | 0.801556 | 4.861538 | -6.35675 | 7.54E-09 | 5.70E-08 | 9.847154 |
| NUP93    | 0.242734 | 1.183233 | 7.253077 | 6.356281 | 7.55E-09 | 5.71E-08 | 9.845089 |
| FUBP1    | 0.23842  | 1.1797   | 7.596813 | 6.355494 | 7.58E-09 | 5.72E-08 | 9.841613 |
| SSTR3    | -0.24366 | 0.844602 | 5.994945 | -6.35548 | 7.58E-09 | 5.72E-08 | 9.841548 |
| CRABP1   | -0.37879 | 0.769081 | 5.417033 | -6.35532 | 7.58E-09 | 5.72E-08 | 9.84086  |
| UBE2L6   | 0.525459 | 1.439391 | 7.855495 | 6.355173 | 7.59E-09 | 5.72E-08 | 9.840193 |
| MRPS17   | 0.20872  | 1.155662 | 7.965604 | 6.354711 | 7.61E-09 | 5.73E-08 | 9.838151 |
| IFI16    | 0.666531 | 1.587252 | 6.113516 | 6.352295 | 7.69E-09 | 5.78E-08 | 9.827474 |
| TNNI1    | -0.29542 | 0.814835 | 4.5      | -6.35171 | 7.71E-09 | 5.79E-08 | 9.82487  |
| SULT2B1  | -0.27107 | 0.828706 | 5.997912 | -6.3512  | 7.73E-09 | 5.80E-08 | 9.822627 |

|           |          |          |          |          |          |          |          |
|-----------|----------|----------|----------|----------|----------|----------|----------|
| KIN       | 0.251193 | 1.190191 | 4.747912 | 6.350761 | 7.74E-09 | 5.80E-08 | 9.820693 |
| TMEM59L   | -0.28906 | 0.818436 | 5.989451 | -6.35054 | 7.75E-09 | 5.80E-08 | 9.819728 |
| KYNU      | -0.27865 | 0.824364 | 7.153077 | -6.35047 | 7.75E-09 | 5.80E-08 | 9.819409 |
| BHLHE40   | -0.56034 | 0.678141 | 7.697473 | -6.35034 | 7.76E-09 | 5.80E-08 | 9.818848 |
| KRT10     | 0.249957 | 1.189171 | 8.861648 | 6.348619 | 7.82E-09 | 5.84E-08 | 9.811229 |
| TCEB3-AS1 | -0.27639 | 0.825656 | 6.485934 | -6.34846 | 7.82E-09 | 5.84E-08 | 9.81051  |
| TESC      | 0.594947 | 1.510417 | 6.106813 | 6.343445 | 8.00E-09 | 5.97E-08 | 9.788374 |
| DDX41     | 0.220493 | 1.165131 | 7.941209 | 6.341821 | 8.06E-09 | 6.01E-08 | 9.7812   |
| MAPK8     | -0.22073 | 0.858131 | 6.158022 | -6.33812 | 8.20E-09 | 6.11E-08 | 9.764867 |
| PTRH2     | 0.245295 | 1.185335 | 7.63956  | 6.337361 | 8.23E-09 | 6.12E-08 | 9.761507 |
| SEC11A    | 0.203961 | 1.151857 | 10.71912 | 6.336427 | 8.26E-09 | 6.14E-08 | 9.757384 |
| KIAA1551  | 0.352551 | 1.276816 | 6.079121 | 6.336305 | 8.27E-09 | 6.14E-08 | 9.756847 |
| DSTN      | 0.186019 | 1.13762  | 11.54286 | 6.334634 | 8.33E-09 | 6.18E-08 | 9.749467 |
| IVL       | -0.24281 | 0.845097 | 5.743407 | -6.33452 | 8.33E-09 | 6.18E-08 | 9.748973 |
| IGFALS    | -0.24357 | 0.844653 | 5.628901 | -6.33354 | 8.37E-09 | 6.20E-08 | 9.744644 |
| EXT1      | 0.284396 | 1.2179   | 7.168462 | 6.332088 | 8.43E-09 | 6.24E-08 | 9.738229 |
| TP53I3    | 0.336198 | 1.262425 | 8.385165 | 6.330852 | 8.47E-09 | 6.27E-08 | 9.732777 |
| DNAJC13   | 0.222961 | 1.167127 | 6.033516 | 6.328404 | 8.57E-09 | 6.33E-08 | 9.721972 |
| FBXL4     | 0.252169 | 1.190996 | 5.782308 | 6.327768 | 8.59E-09 | 6.35E-08 | 9.719167 |
| HPX       | -0.22003 | 0.858548 | 6.45989  | -6.32629 | 8.65E-09 | 6.38E-08 | 9.712624 |
| SOX10     | -0.20219 | 0.869231 | 5.411538 | -6.32582 | 8.67E-09 | 6.39E-08 | 9.710557 |
| SNX5      | -0.23525 | 0.849537 | 9.927363 | -6.32561 | 8.68E-09 | 6.39E-08 | 9.709658 |
| HMX1      | -0.27398 | 0.827037 | 6.435604 | -6.32257 | 8.80E-09 | 6.47E-08 | 9.696219 |
| MMP25     | -0.2299  | 0.852695 | 6.000879 | -6.32192 | 8.82E-09 | 6.49E-08 | 9.693359 |
| NSMAF     | 0.286536 | 1.219708 | 5.895824 | 6.319395 | 8.93E-09 | 6.56E-08 | 9.682231 |
| GNB1      | 0.195    | 1.144724 | 9.181429 | 6.319085 | 8.94E-09 | 6.56E-08 | 9.680861 |
| SEMA4A    | -0.23594 | 0.84913  | 6.775934 | -6.31835 | 8.97E-09 | 6.58E-08 | 9.67762  |
| MSRA      | -0.35752 | 0.780504 | 10.90473 | -6.31504 | 9.10E-09 | 6.67E-08 | 9.66303  |
| GPR31     | -0.23221 | 0.851328 | 4.875604 | -6.31498 | 9.11E-09 | 6.67E-08 | 9.662779 |
| IL17RB    | 0.527406 | 1.441335 | 10.54407 | 6.306845 | 9.45E-09 | 6.91E-08 | 9.6269   |
| CSF3      | -0.2095  | 0.864835 | 6.038791 | -6.30441 | 9.55E-09 | 6.98E-08 | 9.616187 |
| CRIP2     | 0.510188 | 1.424236 | 6.980769 | 6.299561 | 9.76E-09 | 7.13E-08 | 9.594812 |
| KRT76     | -0.22777 | 0.853955 | 4.997802 | -6.29916 | 9.78E-09 | 7.13E-08 | 9.593046 |
| RRM1      | 0.279092 | 1.213431 | 6.567143 | 6.298937 | 9.79E-09 | 7.13E-08 | 9.592061 |
| CDK2AP2   | 0.548488 | 1.462552 | 7.203187 | 6.298936 | 9.79E-09 | 7.13E-08 | 9.592058 |
| INTS8     | 0.287879 | 1.220844 | 7.506923 | 6.296931 | 9.88E-09 | 7.19E-08 | 9.583229 |
| UPF3B     | 0.275807 | 1.210671 | 5.587692 | 6.295535 | 9.94E-09 | 7.23E-08 | 9.577078 |
| GPC3      | -0.85209 | 0.553981 | 7.554505 | -6.29479 | 9.98E-09 | 7.25E-08 | 9.573802 |
| NNAT      | -0.21971 | 0.858738 | 5.204396 | -6.29441 | 9.99E-09 | 7.25E-08 | 9.572121 |
| CRISP2    | -0.32857 | 0.796325 | 4.171868 | -6.29435 | 1.00E-08 | 7.25E-08 | 9.571874 |
| NBEA      | 0.373913 | 1.295863 | 5.530989 | 6.293617 | 1.00E-08 | 7.27E-08 | 9.568631 |
| YTHDC1    | 0.240415 | 1.181333 | 7.757582 | 6.291475 | 1.01E-08 | 7.33E-08 | 9.559201 |
| BTN3A2    | 0.505957 | 1.420065 | 5.658242 | 6.290149 | 1.02E-08 | 7.37E-08 | 9.553366 |
| SNTA1     | -0.32685 | 0.797275 | 7.16011  | -6.2874  | 1.03E-08 | 7.45E-08 | 9.541244 |
| SNRPB     | 0.3303   | 1.257274 | 8.716813 | 6.284606 | 1.04E-08 | 7.54E-08 | 9.528966 |
| BTNL8     | -0.25162 | 0.839954 | 4.902747 | -6.2846  | 1.04E-08 | 7.54E-08 | 9.528944 |
| DKKL1     | -0.22788 | 0.853889 | 5.652747 | -6.2822  | 1.06E-08 | 7.61E-08 | 9.518378 |

|          |          |          |          |          |          |          |          |
|----------|----------|----------|----------|----------|----------|----------|----------|
| SEMA4D   | 0.331807 | 1.258589 | 6.985385 | 6.279487 | 1.07E-08 | 7.70E-08 | 9.506445 |
| ALDH3A2  | -0.54545 | 0.685178 | 9.925055 | -6.27931 | 1.07E-08 | 7.70E-08 | 9.505687 |
| ASCL3    | -0.2675  | 0.830757 | 5.03011  | -6.27835 | 1.07E-08 | 7.73E-08 | 9.501432 |
| VPS45    | 0.253947 | 1.192465 | 7.403187 | 6.273899 | 1.10E-08 | 7.88E-08 | 9.481866 |
| NRAS     | 0.369773 | 1.292149 | 7.032637 | 6.267994 | 1.13E-08 | 8.08E-08 | 9.455903 |
| ACOT13   | -0.42841 | 0.743082 | 9.94989  | -6.26629 | 1.13E-08 | 8.14E-08 | 9.448399 |
| PAXIP1   | 0.23513  | 1.177013 | 6.207143 | 6.262216 | 1.16E-08 | 8.28E-08 | 9.430506 |
| PSMD7    | 0.221459 | 1.165912 | 8.655165 | 6.259657 | 1.17E-08 | 8.37E-08 | 9.419264 |
| PNLIPRP1 | -0.26696 | 0.831068 | 5.344725 | -6.25497 | 1.19E-08 | 8.54E-08 | 9.398676 |
| TMEM127  | 0.18215  | 1.134573 | 7.806813 | 6.252102 | 1.21E-08 | 8.65E-08 | 9.386076 |
| CTH      | -0.42515 | 0.744761 | 6.968022 | -6.25164 | 1.21E-08 | 8.66E-08 | 9.384046 |
| ARC      | -0.2916  | 0.816993 | 4.483626 | -6.25001 | 1.22E-08 | 8.71E-08 | 9.376875 |
| HTR1B    | -0.20632 | 0.866743 | 4.903407 | -6.24928 | 1.23E-08 | 8.72E-08 | 9.373697 |
| IFNGR1   | 0.350787 | 1.275256 | 7.938901 | 6.249249 | 1.23E-08 | 8.72E-08 | 9.373548 |
| SPATA5L1 | 0.248749 | 1.188176 | 6.096703 | 6.249217 | 1.23E-08 | 8.72E-08 | 9.373408 |
| CDSN     | -0.21575 | 0.861096 | 5.334396 | -6.24846 | 1.23E-08 | 8.74E-08 | 9.370092 |
| AZGP1    | -0.59298 | 0.662972 | 10.16264 | -6.24695 | 1.24E-08 | 8.80E-08 | 9.363469 |
| HIP1R    | -0.25671 | 0.836994 | 6.131099 | -6.24507 | 1.25E-08 | 8.86E-08 | 9.35519  |
| PERP     | 0.489739 | 1.404191 | 6.38044  | 6.244547 | 1.25E-08 | 8.88E-08 | 9.352908 |
| SLC2A4   | -0.18569 | 0.879231 | 4.502308 | -6.24188 | 1.27E-08 | 8.98E-08 | 9.341219 |
| PEPD     | -0.34755 | 0.785917 | 11.54835 | -6.23896 | 1.28E-08 | 9.08E-08 | 9.328378 |
| MBD4     | 0.292512 | 1.224771 | 7.247692 | 6.238954 | 1.28E-08 | 9.08E-08 | 9.328362 |
| METTL5   | 0.271729 | 1.207254 | 8.852198 | 6.238825 | 1.28E-08 | 9.08E-08 | 9.327794 |
| ERCC2    | -0.2568  | 0.836941 | 6.296923 | -6.23775 | 1.29E-08 | 9.12E-08 | 9.323069 |
| RYK      | 0.198884 | 1.14781  | 6.708132 | 6.237514 | 1.29E-08 | 9.12E-08 | 9.322042 |
| UPF2     | 0.265034 | 1.201664 | 6.447582 | 6.236417 | 1.30E-08 | 9.16E-08 | 9.317232 |
| DPP4     | -0.57857 | 0.669627 | 9.228242 | -6.23584 | 1.30E-08 | 9.17E-08 | 9.314689 |
| CD1A     | -0.24131 | 0.845974 | 4.951538 | -6.23563 | 1.30E-08 | 9.17E-08 | 9.31379  |
| IL13     | -0.2606  | 0.834741 | 5.614176 | -6.23423 | 1.31E-08 | 9.22E-08 | 9.307643 |
| CMPK1    | 0.244266 | 1.18449  | 8.472747 | 6.23266  | 1.32E-08 | 9.28E-08 | 9.300749 |
| ALDH1A1  | 0.365783 | 1.28858  | 10.6411  | 6.23012  | 1.34E-08 | 9.38E-08 | 9.289608 |
| PLAGL2   | -0.21796 | 0.859782 | 5.614176 | -6.2292  | 1.34E-08 | 9.41E-08 | 9.285555 |
| BCAP31   | 0.225333 | 1.169047 | 10.79143 | 6.228399 | 1.35E-08 | 9.44E-08 | 9.282061 |
| SSUH2    | -0.28736 | 0.819402 | 5.386813 | -6.22768 | 1.35E-08 | 9.46E-08 | 9.278903 |
| C21orf2  | -0.23363 | 0.850491 | 6.300989 | -6.227   | 1.35E-08 | 9.48E-08 | 9.27592  |
| MUC1     | 0.510749 | 1.42479  | 8.056264 | 6.225964 | 1.36E-08 | 9.52E-08 | 9.271389 |
| GNL2     | 0.275976 | 1.210813 | 5.615385 | 6.224613 | 1.37E-08 | 9.57E-08 | 9.265465 |
| VPS26A   | 0.144536 | 1.105375 | 10.2156  | 6.224101 | 1.37E-08 | 9.58E-08 | 9.26322  |
| EGF      | -1.0048  | 0.49834  | 8.157253 | -6.22154 | 1.39E-08 | 9.68E-08 | 9.252001 |
| ST5      | 0.336986 | 1.263115 | 6.010989 | 6.219847 | 1.40E-08 | 9.75E-08 | 9.244574 |
| IFIH1    | 0.577116 | 1.491864 | 5.835604 | 6.216972 | 1.42E-08 | 9.86E-08 | 9.231974 |
| MCAM     | 0.319019 | 1.247482 | 6.053626 | 6.216917 | 1.42E-08 | 9.86E-08 | 9.231738 |
| CA8      | -0.38623 | 0.765125 | 5.328571 | -6.21642 | 1.42E-08 | 9.88E-08 | 9.229576 |
| ABLIM1   | 0.229275 | 1.172246 | 8.890769 | 6.215576 | 1.43E-08 | 9.90E-08 | 9.225862 |
| ULK4     | -0.29156 | 0.817018 | 5.235604 | -6.21554 | 1.43E-08 | 9.90E-08 | 9.225706 |
| PGLYRP4  | -0.25643 | 0.837154 | 5.763626 | -6.21186 | 1.45E-08 | 1.01E-07 | 9.209587 |
| SH3GLB1  | 0.1983   | 1.147345 | 8.691538 | 6.21042  | 1.46E-08 | 1.01E-07 | 9.203275 |

|          |          |          |          |          |          |          |          |
|----------|----------|----------|----------|----------|----------|----------|----------|
| ZSWIM8-A | -0.24358 | 0.844644 | 6.298242 | -6.20855 | 1.47E-08 | 1.02E-07 | 9.195069 |
| SLC26A2  | 0.50214  | 1.416313 | 5.364615 | 6.206181 | 1.49E-08 | 1.03E-07 | 9.184713 |
| PSMA1    | 0.161319 | 1.118309 | 10.26912 | 6.20559  | 1.49E-08 | 1.03E-07 | 9.182125 |
| TREH     | -1.00091 | 0.499685 | 6.974176 | -6.2027  | 1.51E-08 | 1.04E-07 | 9.169483 |
| CTNNBIP1 | -0.25993 | 0.83513  | 7.784725 | -6.20144 | 1.52E-08 | 1.05E-07 | 9.163953 |
| TRIM62   | -0.19153 | 0.875676 | 6.006374 | -6.20041 | 1.53E-08 | 1.05E-07 | 9.15944  |
| SULT1B1  | -0.25314 | 0.839065 | 5.413297 | -6.20032 | 1.53E-08 | 1.05E-07 | 9.15904  |
| NT5DC2   | 0.38014  | 1.301468 | 5.164286 | 6.199958 | 1.53E-08 | 1.05E-07 | 9.157471 |
| EXOC2    | 0.254063 | 1.192561 | 5.598462 | 6.199691 | 1.53E-08 | 1.05E-07 | 9.156301 |
| DNAI1    | -0.26462 | 0.832416 | 4.971099 | -6.19915 | 1.54E-08 | 1.06E-07 | 9.15392  |
| LAMB1    | 0.297362 | 1.228896 | 7.838352 | 6.198925 | 1.54E-08 | 1.06E-07 | 9.152949 |
| ARHGDI3  | 0.625734 | 1.542996 | 7.577473 | 6.197331 | 1.55E-08 | 1.06E-07 | 9.145971 |
| TLR1     | 0.456314 | 1.372032 | 4.42978  | 6.19445  | 1.57E-08 | 1.08E-07 | 9.133368 |
| DAAM2    | -0.23735 | 0.848303 | 5.661978 | -6.19429 | 1.57E-08 | 1.08E-07 | 9.13268  |
| ICE2     | 0.196227 | 1.145698 | 5.717253 | 6.19382  | 1.57E-08 | 1.08E-07 | 9.13061  |
| HSD17B8  | -0.27872 | 0.824322 | 9.04978  | -6.1936  | 1.57E-08 | 1.08E-07 | 9.129666 |
| PLOD1    | -0.3218  | 0.800073 | 7.85     | -6.1934  | 1.58E-08 | 1.08E-07 | 9.128791 |
| TBC1D29  | -0.2078  | 0.865855 | 4.676154 | -6.19329 | 1.58E-08 | 1.08E-07 | 9.128302 |
| GDF2     | -0.22365 | 0.856395 | 5.855055 | -6.19273 | 1.58E-08 | 1.08E-07 | 9.125854 |
| BCLAF1   | 0.223768 | 1.16778  | 7.19022  | 6.19019  | 1.60E-08 | 1.09E-07 | 9.11473  |
| DSCAM    | -0.19548 | 0.873283 | 5.126813 | -6.18937 | 1.60E-08 | 1.09E-07 | 9.111135 |
| TPSD1    | -0.18454 | 0.879929 | 5.624396 | -6.18911 | 1.61E-08 | 1.09E-07 | 9.110013 |
| LUC7L3   | 0.290213 | 1.22282  | 7.783077 | 6.188312 | 1.61E-08 | 1.10E-07 | 9.106517 |
| ZNF638   | 0.258638 | 1.196348 | 8.036593 | 6.186478 | 1.63E-08 | 1.10E-07 | 9.098499 |
| PNMAL1   | 0.576362 | 1.491085 | 6.391319 | 6.181905 | 1.66E-08 | 1.13E-07 | 9.078502 |
| TMED3    | 0.335106 | 1.26147  | 7.805495 | 6.179119 | 1.68E-08 | 1.14E-07 | 9.066328 |
| ULK1     | -0.27724 | 0.82517  | 6.237253 | -6.17753 | 1.69E-08 | 1.15E-07 | 9.05938  |
| SLC25A24 | 0.294285 | 1.226277 | 7.918352 | 6.177345 | 1.69E-08 | 1.15E-07 | 9.058572 |
| GFRA4    | -0.19477 | 0.87371  | 5.508901 | -6.17701 | 1.70E-08 | 1.15E-07 | 9.057127 |
| CACNA1H  | -0.23795 | 0.847948 | 5.974505 | -6.17259 | 1.73E-08 | 1.17E-07 | 9.037818 |
| PAPSS1   | 0.303353 | 1.234009 | 8.830879 | 6.171775 | 1.74E-08 | 1.17E-07 | 9.034234 |
| CDA      | -0.40911 | 0.753087 | 5.677692 | -6.17167 | 1.74E-08 | 1.17E-07 | 9.033792 |
| GPR21    | -0.20931 | 0.864948 | 6.117363 | -6.17088 | 1.74E-08 | 1.18E-07 | 9.030322 |
| SCML1    | -0.29074 | 0.817483 | 5.302967 | -6.16904 | 1.76E-08 | 1.18E-07 | 9.022294 |
| PTPRF    | 0.262034 | 1.199168 | 7.091099 | 6.168896 | 1.76E-08 | 1.18E-07 | 9.021662 |
| SLC27A3  | 0.403758 | 1.32295  | 5.798791 | 6.168335 | 1.76E-08 | 1.19E-07 | 9.019209 |
| SLC13A3  | -0.49095 | 0.711558 | 10.33462 | -6.16768 | 1.77E-08 | 1.19E-07 | 9.016348 |
| CDK1     | 0.484    | 1.398616 | 4.729341 | 6.166617 | 1.78E-08 | 1.19E-07 | 9.011706 |
| CETN3    | 0.359957 | 1.283387 | 7.426044 | 6.166584 | 1.78E-08 | 1.19E-07 | 9.011562 |
| FBN1     | 0.263575 | 1.20045  | 4.921209 | 6.166552 | 1.78E-08 | 1.19E-07 | 9.011425 |
| ZFAND5   | -0.49457 | 0.709771 | 9.80956  | -6.16619 | 1.78E-08 | 1.19E-07 | 9.009843 |
| TMEM106  | 0.224551 | 1.168413 | 9.455824 | 6.16391  | 1.80E-08 | 1.21E-07 | 8.999887 |
| DNAAF5   | 0.221324 | 1.165803 | 7.419011 | 6.163696 | 1.80E-08 | 1.21E-07 | 8.998951 |
| C11orf71 | -0.39418 | 0.76092  | 7.406813 | -6.16308 | 1.81E-08 | 1.21E-07 | 8.996248 |
| FAS      | 0.557174 | 1.471384 | 6.348352 | 6.161641 | 1.82E-08 | 1.21E-07 | 8.989982 |
| LEFTY2   | -0.19622 | 0.872836 | 4.963187 | -6.16138 | 1.82E-08 | 1.21E-07 | 8.988827 |
| RNF44    | 0.235333 | 1.177179 | 7.606374 | 6.161234 | 1.82E-08 | 1.21E-07 | 8.988202 |

|          |          |          |          |          |          |          |          |
|----------|----------|----------|----------|----------|----------|----------|----------|
| CRYBB3   | -0.34124 | 0.789362 | 5.335385 | -6.16014 | 1.83E-08 | 1.22E-07 | 8.983438 |
| PPP1R8   | 0.181072 | 1.133726 | 8.437802 | 6.158411 | 1.84E-08 | 1.23E-07 | 8.97588  |
| NSUN5    | 0.296676 | 1.228311 | 5.717143 | 6.156616 | 1.86E-08 | 1.24E-07 | 8.968049 |
| SPAM1    | -0.19333 | 0.874583 | 4.484396 | -6.15586 | 1.86E-08 | 1.24E-07 | 8.964735 |
| CDK7     | 0.364213 | 1.287179 | 7.61967  | 6.153766 | 1.88E-08 | 1.25E-07 | 8.955611 |
| PCDHB1   | -0.19215 | 0.8753   | 4.728242 | -6.15262 | 1.89E-08 | 1.26E-07 | 8.950618 |
| PCDHA9   | -0.21029 | 0.864366 | 4.203187 | -6.15183 | 1.90E-08 | 1.26E-07 | 8.947166 |
| TYROBP   | 1.000512 | 2.00071  | 6.857802 | 6.149544 | 1.92E-08 | 1.27E-07 | 8.937193 |
| IL15     | 0.2097   | 1.156448 | 4.34022  | 6.148894 | 1.92E-08 | 1.27E-07 | 8.934358 |
| RUSC2    | -0.19636 | 0.872748 | 6.886593 | -6.14854 | 1.93E-08 | 1.28E-07 | 8.932813 |
| SETX     | 0.206671 | 1.154023 | 6.602418 | 6.146769 | 1.94E-08 | 1.28E-07 | 8.925088 |
| CCDC109B | 0.507068 | 1.421159 | 5.468791 | 6.146654 | 1.94E-08 | 1.28E-07 | 8.924588 |
| TBKBP1   | -0.19775 | 0.87191  | 5.693516 | -6.14522 | 1.96E-08 | 1.29E-07 | 8.918342 |
| VGLL4    | 0.220638 | 1.165249 | 7.687802 | 6.14409  | 1.97E-08 | 1.30E-07 | 8.913406 |
| TSPAN6   | 0.311372 | 1.240887 | 9.205714 | 6.141747 | 1.99E-08 | 1.31E-07 | 8.903189 |
| APOBEC3C | 0.468174 | 1.383357 | 5.649341 | 6.140975 | 1.99E-08 | 1.31E-07 | 8.899822 |
| CRYL1    | -0.31428 | 0.804255 | 11.1722  | -6.14034 | 2.00E-08 | 1.32E-07 | 8.897035 |
| MAEA     | 0.233024 | 1.175296 | 8.741319 | 6.13948  | 2.01E-08 | 1.32E-07 | 8.893306 |
| SOX13    | -0.22654 | 0.854684 | 6.383846 | -6.13886 | 2.01E-08 | 1.32E-07 | 8.890618 |
| ENTPD4   | 0.188324 | 1.139439 | 5.947692 | 6.138554 | 2.02E-08 | 1.32E-07 | 8.88927  |
| C1orf21  | -0.26749 | 0.830765 | 5.360769 | -6.13693 | 2.03E-08 | 1.33E-07 | 8.882193 |
| ANKMY2   | 0.310836 | 1.240426 | 8.271319 | 6.136578 | 2.03E-08 | 1.33E-07 | 8.880658 |
| CACNG4   | -0.176   | 0.885154 | 6.662967 | -6.13585 | 2.04E-08 | 1.34E-07 | 8.877478 |
| INTS9    | 0.216889 | 1.162225 | 6.757253 | 6.135214 | 2.05E-08 | 1.34E-07 | 8.874715 |
| APBB3    | -0.25801 | 0.836241 | 6.541978 | -6.13351 | 2.06E-08 | 1.35E-07 | 8.867273 |
| TOM1L2   | -0.19339 | 0.874548 | 6.581758 | -6.13257 | 2.07E-08 | 1.35E-07 | 8.86321  |
| POLR3C   | 0.196821 | 1.14617  | 6.554286 | 6.132516 | 2.07E-08 | 1.35E-07 | 8.862959 |
| GCH1     | -0.51397 | 0.700295 | 9.187363 | -6.13213 | 2.07E-08 | 1.35E-07 | 8.861293 |
| ARAP2    | 0.268039 | 1.20417  | 5.264286 | 6.131566 | 2.08E-08 | 1.36E-07 | 8.858819 |
| TMPRSS6  | -0.19809 | 0.871703 | 6.627912 | -6.12893 | 2.10E-08 | 1.37E-07 | 8.847355 |
| FAM214B  | -0.21936 | 0.858948 | 6.72044  | -6.12771 | 2.12E-08 | 1.38E-07 | 8.842037 |
| KIAA1033 | 0.256295 | 1.194407 | 7.89     | 6.126962 | 2.12E-08 | 1.38E-07 | 8.838765 |
| CA11     | -0.24094 | 0.846195 | 5.428681 | -6.12635 | 2.13E-08 | 1.38E-07 | 8.836078 |
| SLC6A13  | -0.47057 | 0.721679 | 8.931648 | -6.12551 | 2.14E-08 | 1.39E-07 | 8.832441 |
| CDX2     | -0.25446 | 0.838301 | 5.313516 | -6.12534 | 2.14E-08 | 1.39E-07 | 8.831697 |
| CYP4A11  | -0.63018 | 0.646096 | 8.44033  | -6.1235  | 2.16E-08 | 1.40E-07 | 8.823707 |
| MPP3     | -0.26961 | 0.829542 | 5.624066 | -6.12278 | 2.16E-08 | 1.40E-07 | 8.820535 |
| WEE1     | -0.28304 | 0.821855 | 6.733077 | -6.1227  | 2.16E-08 | 1.40E-07 | 8.820221 |
| LYPD3    | -0.28403 | 0.821291 | 6.228022 | -6.12218 | 2.17E-08 | 1.40E-07 | 8.817939 |
| TAF9     | 0.27871  | 1.21311  | 8.54978  | 6.121692 | 2.17E-08 | 1.41E-07 | 8.815816 |
| C1QA     | 0.894628 | 1.85913  | 6.380659 | 6.120347 | 2.19E-08 | 1.41E-07 | 8.809957 |
| FOXC2    | -0.20827 | 0.865577 | 4.295055 | -6.1186  | 2.20E-08 | 1.42E-07 | 8.802354 |
| ABCC1    | 0.22342  | 1.167498 | 5.784396 | 6.118379 | 2.21E-08 | 1.42E-07 | 8.801394 |
| PPIF     | 0.333565 | 1.260124 | 8.095385 | 6.11779  | 2.21E-08 | 1.43E-07 | 8.79883  |
| GATA6    | -0.37856 | 0.769205 | 4.137582 | -6.11541 | 2.24E-08 | 1.44E-07 | 8.788477 |
| STAP2    | 0.373082 | 1.295117 | 7.563187 | 6.114511 | 2.24E-08 | 1.45E-07 | 8.784558 |
| LRRC1    | 0.38314  | 1.304177 | 7.550769 | 6.113302 | 2.26E-08 | 1.45E-07 | 8.779299 |

|          |          |          |          |          |          |          |          |
|----------|----------|----------|----------|----------|----------|----------|----------|
| PPIH     | 0.314865 | 1.243895 | 7.034615 | 6.11296  | 2.26E-08 | 1.45E-07 | 8.777809 |
| ASUN     | 0.298338 | 1.229727 | 6.952747 | 6.112211 | 2.27E-08 | 1.46E-07 | 8.774548 |
| NEUROD6  | -0.25619 | 0.837297 | 5.804835 | -6.11018 | 2.29E-08 | 1.47E-07 | 8.7657   |
| SH3D21   | -0.23452 | 0.84997  | 5.470769 | -6.10748 | 2.32E-08 | 1.49E-07 | 8.753981 |
| SLC37A4  | -0.35888 | 0.77977  | 9.842967 | -6.10719 | 2.32E-08 | 1.49E-07 | 8.752705 |
| ARHGEF18 | 0.216097 | 1.161587 | 8.141209 | 6.107091 | 2.32E-08 | 1.49E-07 | 8.752277 |
| CAST     | 0.218242 | 1.163315 | 8.698791 | 6.104758 | 2.34E-08 | 1.50E-07 | 8.74213  |
| MCM5     | 0.311527 | 1.24102  | 5.242747 | 6.104588 | 2.35E-08 | 1.50E-07 | 8.74139  |
| TTPA     | -0.26334 | 0.833155 | 4.239341 | -6.09862 | 2.41E-08 | 1.54E-07 | 8.715458 |
| ENAH     | 0.292507 | 1.224767 | 6.157473 | 6.098208 | 2.41E-08 | 1.54E-07 | 8.713653 |
| NRCAM    | 0.430155 | 1.347378 | 5.84967  | 6.097661 | 2.42E-08 | 1.54E-07 | 8.711277 |
| SLC25A10 | -0.37423 | 0.771519 | 7.104725 | -6.09759 | 2.42E-08 | 1.54E-07 | 8.710958 |
| QARS     | 0.263797 | 1.200635 | 9.401319 | 6.09755  | 2.42E-08 | 1.54E-07 | 8.710793 |
| FKBP6    | -0.20185 | 0.869435 | 5.266923 | -6.09741 | 2.42E-08 | 1.54E-07 | 8.710171 |
| GNRH2    | -0.23    | 0.852635 | 5.086264 | -6.09611 | 2.44E-08 | 1.55E-07 | 8.704537 |
| PIP5K1B  | -0.3786  | 0.769182 | 5.765604 | -6.09453 | 2.45E-08 | 1.56E-07 | 8.697669 |
| SEC61A1  | 0.237691 | 1.179104 | 8.513626 | 6.094387 | 2.46E-08 | 1.56E-07 | 8.697046 |
| ABCC6    | -0.44239 | 0.735916 | 7.073846 | -6.09397 | 2.46E-08 | 1.56E-07 | 8.695219 |
| NOTCH4   | -0.18604 | 0.879013 | 5.076044 | -6.09304 | 2.47E-08 | 1.57E-07 | 8.691209 |
| TIPARP   | -0.80689 | 0.571611 | 8.600769 | -6.09257 | 2.48E-08 | 1.57E-07 | 8.68917  |
| ATF3     | -1.3342  | 0.396611 | 6.241099 | -6.092   | 2.48E-08 | 1.57E-07 | 8.686664 |
| YTHDF1   | 0.178077 | 1.131375 | 8.801538 | 6.091059 | 2.49E-08 | 1.58E-07 | 8.682587 |
| LOC44160 | -0.24553 | 0.843508 | 6.11989  | -6.09084 | 2.49E-08 | 1.58E-07 | 8.681627 |
| ALPL     | -0.47503 | 0.71945  | 6.008571 | -6.08826 | 2.52E-08 | 1.59E-07 | 8.670439 |
| TBX4     | -0.19582 | 0.873079 | 4.341429 | -6.08526 | 2.56E-08 | 1.61E-07 | 8.657381 |
| BEST2    | -0.24218 | 0.845465 | 5.011978 | -6.08433 | 2.57E-08 | 1.62E-07 | 8.653347 |
| RGS10    | 0.564246 | 1.478615 | 6.14011  | 6.083902 | 2.57E-08 | 1.62E-07 | 8.6515   |
| GLI3     | -0.31434 | 0.80422  | 7.119341 | -6.0836  | 2.58E-08 | 1.62E-07 | 8.650175 |
| FOS      | -1.52414 | 0.347688 | 6.82022  | -6.08139 | 2.60E-08 | 1.64E-07 | 8.640585 |
| KLK11    | -0.22285 | 0.856874 | 5.341758 | -6.07464 | 2.68E-08 | 1.69E-07 | 8.611274 |
| APOLD1   | -0.67522 | 0.626236 | 5.721099 | -6.07359 | 2.69E-08 | 1.69E-07 | 8.606742 |
| SFXN1    | -0.36832 | 0.774685 | 7.983516 | -6.07108 | 2.72E-08 | 1.71E-07 | 8.595844 |
| USP2     | -0.70921 | 0.611656 | 7.044945 | -6.07085 | 2.73E-08 | 1.71E-07 | 8.594843 |
| FBXO9    | -0.17622 | 0.88502  | 8.143077 | -6.07025 | 2.73E-08 | 1.72E-07 | 8.592225 |
| PP13     | -0.22185 | 0.857465 | 6.597033 | -6.06856 | 2.76E-08 | 1.73E-07 | 8.584909 |
| CIAPIN1  | 0.219101 | 1.164008 | 7.417912 | 6.067538 | 2.77E-08 | 1.73E-07 | 8.580482 |
| KIAA1467 | -0.27206 | 0.828135 | 6.452637 | -6.06522 | 2.80E-08 | 1.75E-07 | 8.570448 |
| ZBTB7B   | -0.24839 | 0.841835 | 5.37956  | -6.06486 | 2.80E-08 | 1.75E-07 | 8.568851 |
| SLC13A4  | -0.22576 | 0.855145 | 5.319231 | -6.05939 | 2.87E-08 | 1.79E-07 | 8.545154 |
| LPO      | -0.20083 | 0.870049 | 4.823297 | -6.05696 | 2.90E-08 | 1.81E-07 | 8.534624 |
| GCA      | 0.309319 | 1.239123 | 6.142308 | 6.056072 | 2.91E-08 | 1.82E-07 | 8.530765 |
| CFI      | 0.353126 | 1.277325 | 10.54527 | 6.056065 | 2.91E-08 | 1.82E-07 | 8.530739 |
| NFKBIA   | -0.48726 | 0.713378 | 9.602308 | -6.0543  | 2.94E-08 | 1.83E-07 | 8.523102 |
| ADAMTS1  | 1.047802 | 2.067378 | 6.999231 | 6.052669 | 2.96E-08 | 1.84E-07 | 8.51602  |
| GRIP2    | -0.24775 | 0.842207 | 6.518571 | -6.0502  | 2.99E-08 | 1.86E-07 | 8.505316 |
| LIPF     | -0.18983 | 0.876708 | 4.253736 | -6.05011 | 2.99E-08 | 1.86E-07 | 8.504924 |
| DNASE2   | 0.241768 | 1.182441 | 6.509121 | 6.049743 | 3.00E-08 | 1.86E-07 | 8.503343 |



|         |          |          |          |          |          |          |          |
|---------|----------|----------|----------|----------|----------|----------|----------|
| CD1B    | -0.22905 | 0.853198 | 5.77956  | -6.04868 | 3.01E-08 | 1.87E-07 | 8.498745 |
| PARD6A  | -0.19921 | 0.871026 | 6.526923 | -6.04819 | 3.02E-08 | 1.87E-07 | 8.496617 |
| PRKACG  | -0.21483 | 0.861647 | 5.146374 | -6.04682 | 3.04E-08 | 1.88E-07 | 8.490703 |
| OLFM4   | 1.60585  | 3.043751 | 5.697363 | 6.046428 | 3.04E-08 | 1.88E-07 | 8.488983 |
| MYOZ3   | -0.2162  | 0.860831 | 6.074176 | -6.04554 | 3.05E-08 | 1.89E-07 | 8.485152 |
| SPTBN4  | -0.17626 | 0.884994 | 5.581099 | -6.04405 | 3.07E-08 | 1.90E-07 | 8.478695 |
| EI24    | 0.179971 | 1.132861 | 7.687692 | 6.043437 | 3.08E-08 | 1.90E-07 | 8.47603  |
| FOXO1   | -0.27759 | 0.824968 | 7.391209 | -6.04126 | 3.11E-08 | 1.92E-07 | 8.466594 |
| SSBP1   | 0.225527 | 1.169204 | 9.47022  | 6.040523 | 3.12E-08 | 1.93E-07 | 8.463414 |
| CGA     | -0.56532 | 0.675806 | 5.421099 | -6.04034 | 3.12E-08 | 1.93E-07 | 8.462638 |
| NDRG1   | -0.32257 | 0.799644 | 11.17484 | -6.03956 | 3.14E-08 | 1.93E-07 | 8.45923  |
| LLGL1   | -0.22547 | 0.855317 | 6.362418 | -6.03951 | 3.14E-08 | 1.93E-07 | 8.459049 |
| ACTG1   | 0.34644  | 1.271419 | 12.2711  | 6.039499 | 3.14E-08 | 1.93E-07 | 8.458984 |
| ASF1A   | 0.29956  | 1.230769 | 6.898352 | 6.039357 | 3.14E-08 | 1.93E-07 | 8.458366 |
| GML     | -0.24254 | 0.845258 | 4.955934 | -6.03765 | 3.16E-08 | 1.94E-07 | 8.450964 |
| DCSTAMP | -0.1901  | 0.876544 | 4.661429 | -6.037   | 3.17E-08 | 1.95E-07 | 8.44817  |
| FGL2    | 0.639826 | 1.558141 | 8.198571 | 6.035609 | 3.19E-08 | 1.96E-07 | 8.442143 |
| ZNF384  | -0.16827 | 0.889912 | 7.834835 | -6.03552 | 3.19E-08 | 1.96E-07 | 8.441749 |
| MAP3K1  | 0.2797   | 1.213943 | 5.244835 | 6.035266 | 3.20E-08 | 1.96E-07 | 8.440661 |
| CHRM5   | -0.25946 | 0.835398 | 4.455824 | -6.03481 | 3.20E-08 | 1.96E-07 | 8.438706 |
| ELL2    | -0.58695 | 0.665748 | 6.246923 | -6.03472 | 3.20E-08 | 1.96E-07 | 8.438311 |
| YIPF1   | 0.223522 | 1.16758  | 7.739011 | 6.033474 | 3.22E-08 | 1.97E-07 | 8.432904 |
| OVOL1   | -0.27591 | 0.825927 | 6.357473 | -6.03257 | 3.23E-08 | 1.98E-07 | 8.429006 |
| PNP     | -0.37875 | 0.769102 | 9.978791 | -6.03117 | 3.25E-08 | 1.99E-07 | 8.422956 |
| THBS2   | 0.817821 | 1.762742 | 6.986374 | 6.027322 | 3.31E-08 | 2.02E-07 | 8.406292 |
| BLOC1S1 | -0.22514 | 0.855515 | 8.987582 | -6.0273  | 3.31E-08 | 2.02E-07 | 8.406217 |
| CCL16   | -0.22779 | 0.853944 | 4.416923 | -6.02246 | 3.38E-08 | 2.06E-07 | 8.385288 |
| TRIM48  | -0.42196 | 0.746409 | 5.203077 | -6.02212 | 3.39E-08 | 2.06E-07 | 8.383799 |
| CRYBB1  | -0.24828 | 0.841902 | 5.144835 | -6.02151 | 3.40E-08 | 2.07E-07 | 8.38116  |
| RBM28   | 0.232232 | 1.174651 | 6.015275 | 6.019834 | 3.42E-08 | 2.08E-07 | 8.373916 |
| DOT1L   | -0.22867 | 0.853423 | 4.736923 | -6.01949 | 3.43E-08 | 2.08E-07 | 8.372429 |
| CCT3    | 0.218899 | 1.163845 | 9.828681 | 6.017919 | 3.45E-08 | 2.10E-07 | 8.365636 |
| THOC5   | 0.264575 | 1.201282 | 7.146703 | 6.015204 | 3.49E-08 | 2.12E-07 | 8.353904 |
| HNRNPAB | 0.310488 | 1.240127 | 9.435495 | 6.014709 | 3.50E-08 | 2.12E-07 | 8.351763 |
| SACS    | 0.396169 | 1.316009 | 4.253516 | 6.012201 | 3.54E-08 | 2.14E-07 | 8.340926 |
| YOD1    | -0.23733 | 0.848315 | 4.262857 | -6.012   | 3.54E-08 | 2.15E-07 | 8.340064 |
| CARHSP1 | 0.387377 | 1.308013 | 8.323516 | 6.011505 | 3.55E-08 | 2.15E-07 | 8.337921 |
| ALPPL2  | -0.23832 | 0.84773  | 5.467582 | -6.0103  | 3.57E-08 | 2.16E-07 | 8.332707 |
| PPWD1   | 0.236725 | 1.178314 | 5.64967  | 6.008592 | 3.60E-08 | 2.17E-07 | 8.325336 |
| ACOX2   | -0.48175 | 0.716109 | 9.253077 | -6.00769 | 3.61E-08 | 2.18E-07 | 8.321431 |
| TMEM185 | 0.28372  | 1.21733  | 5.097692 | 6.006693 | 3.63E-08 | 2.19E-07 | 8.317134 |
| USP22   | 0.226691 | 1.170148 | 8.473187 | 6.003803 | 3.68E-08 | 2.22E-07 | 8.304655 |
| DECR2   | -0.45785 | 0.72807  | 8.93033  | -6.00181 | 3.71E-08 | 2.23E-07 | 8.296058 |
| PRC1    | 0.526522 | 1.440452 | 4.563846 | 6.001553 | 3.71E-08 | 2.23E-07 | 8.294942 |
| HOXC8   | -0.22913 | 0.853149 | 4.995824 | -5.99937 | 3.75E-08 | 2.25E-07 | 8.285538 |
| PRKCA   | -0.18159 | 0.881731 | 5.808681 | -5.99729 | 3.78E-08 | 2.27E-07 | 8.276525 |
| MAN1B1  | 0.187686 | 1.138935 | 6.908681 | 5.996232 | 3.80E-08 | 2.28E-07 | 8.271974 |

|         |          |          |          |          |          |          |          |
|---------|----------|----------|----------|----------|----------|----------|----------|
| KCNN1   | -0.20712 | 0.866264 | 5.647143 | -5.99601 | 3.81E-08 | 2.28E-07 | 8.270995 |
| KLK7    | -0.43736 | 0.738486 | 5.472637 | -5.99581 | 3.81E-08 | 2.28E-07 | 8.27016  |
| ALOX15B | -0.20814 | 0.865653 | 5.200769 | -5.99553 | 3.81E-08 | 2.28E-07 | 8.268929 |
| PRPF18  | 0.266222 | 1.202654 | 7.231648 | 5.994494 | 3.83E-08 | 2.29E-07 | 8.264476 |
| SLC35D2 | 0.238271 | 1.179578 | 7.32     | 5.994487 | 3.83E-08 | 2.29E-07 | 8.264445 |
| MED6    | 0.250246 | 1.18941  | 5.714835 | 5.993726 | 3.84E-08 | 2.30E-07 | 8.26116  |
| TACC1   | -0.37892 | 0.769012 | 8.351099 | -5.9937  | 3.84E-08 | 2.30E-07 | 8.261036 |
| TYK2    | -0.17872 | 0.883484 | 7.699011 | -5.99208 | 3.87E-08 | 2.31E-07 | 8.254068 |
| WDR62   | -0.17767 | 0.884129 | 5.456923 | -5.98723 | 3.96E-08 | 2.36E-07 | 8.233147 |
| SLC1A6  | -0.18225 | 0.881327 | 5.168571 | -5.98597 | 3.98E-08 | 2.37E-07 | 8.227715 |
| COL11A2 | -0.2031  | 0.868684 | 5.70022  | -5.98494 | 4.00E-08 | 2.38E-07 | 8.223252 |
| PRKAR1B | -0.16098 | 0.89442  | 5.486484 | -5.98289 | 4.03E-08 | 2.40E-07 | 8.214442 |
| PSMA4   | 0.209304 | 1.156131 | 9.152198 | 5.982103 | 4.05E-08 | 2.41E-07 | 8.211034 |
| CLEC1A  | -0.27883 | 0.824261 | 5.004945 | -5.9781  | 4.12E-08 | 2.45E-07 | 8.193778 |
| ITPKB   | -0.28296 | 0.821905 | 5.507033 | -5.97808 | 4.12E-08 | 2.45E-07 | 8.193686 |
| ASIC4   | -0.22717 | 0.85431  | 5.465055 | -5.97805 | 4.12E-08 | 2.45E-07 | 8.193563 |
| MAN2A1  | 0.302816 | 1.23355  | 8.276484 | 5.977614 | 4.13E-08 | 2.45E-07 | 8.191684 |
| PROS1   | 0.366271 | 1.289016 | 7.583297 | 5.976575 | 4.15E-08 | 2.46E-07 | 8.187207 |
| BEGAIN  | -0.26741 | 0.830812 | 5.294505 | -5.97625 | 4.15E-08 | 2.46E-07 | 8.185825 |
| GPR143  | 0.450836 | 1.366832 | 5.870549 | 5.975093 | 4.18E-08 | 2.47E-07 | 8.18082  |
| MAP4K2  | -0.22325 | 0.856633 | 5.053297 | -5.97489 | 4.18E-08 | 2.47E-07 | 8.179927 |
| THOC1   | 0.200812 | 1.149345 | 7.355824 | 5.974654 | 4.18E-08 | 2.47E-07 | 8.178928 |
| PRSS53  | -0.22636 | 0.85479  | 5.711978 | -5.97219 | 4.23E-08 | 2.50E-07 | 8.168294 |
| UTP3    | 0.23371  | 1.175855 | 7.732527 | 5.97152  | 4.24E-08 | 2.50E-07 | 8.165427 |
| KPNA2   | 0.589145 | 1.504355 | 7.822857 | 5.969655 | 4.28E-08 | 2.52E-07 | 8.157397 |
| IFNAR2  | 0.223633 | 1.16767  | 5.604066 | 5.96567  | 4.35E-08 | 2.57E-07 | 8.140233 |
| PPIEL   | -0.2344  | 0.850038 | 4.546044 | -5.96487 | 4.37E-08 | 2.57E-07 | 8.136804 |
| AZIN1   | 0.282372 | 1.216193 | 8.156374 | 5.964271 | 4.38E-08 | 2.58E-07 | 8.13421  |
| HADH    | -0.37666 | 0.77022  | 10.14418 | -5.96418 | 4.38E-08 | 2.58E-07 | 8.133802 |
| WDR3    | 0.227488 | 1.170795 | 6.989451 | 5.96011  | 4.46E-08 | 2.62E-07 | 8.116298 |
| ELOVL6  | 0.320899 | 1.249108 | 5.269121 | 5.959215 | 4.48E-08 | 2.63E-07 | 8.112446 |
| MYO15A  | -0.18678 | 0.878566 | 4.242637 | -5.9591  | 4.48E-08 | 2.63E-07 | 8.111941 |
| GPR12   | -0.22694 | 0.854447 | 5.085604 | -5.95895 | 4.48E-08 | 2.63E-07 | 8.111319 |
| TBX2    | -0.25324 | 0.839009 | 6.468901 | -5.9589  | 4.49E-08 | 2.63E-07 | 8.111101 |
| MED4    | 0.224357 | 1.168257 | 6.597033 | 5.955955 | 4.54E-08 | 2.66E-07 | 8.098418 |
| KIF1BP  | 0.239353 | 1.180463 | 7.749231 | 5.955481 | 4.55E-08 | 2.67E-07 | 8.09638  |
| APLP1   | -0.24514 | 0.843737 | 5.387692 | -5.9485  | 4.70E-08 | 2.75E-07 | 8.066355 |
| MITF    | 0.269106 | 1.205061 | 7.572857 | 5.947732 | 4.71E-08 | 2.76E-07 | 8.063048 |
| CNOT8   | 0.224923 | 1.168715 | 6.652747 | 5.947141 | 4.73E-08 | 2.76E-07 | 8.060504 |
| FAM193A | 0.257908 | 1.195744 | 5.963407 | 5.946692 | 4.74E-08 | 2.76E-07 | 8.058576 |
| PPT2    | -0.189   | 0.877216 | 7.721758 | -5.94591 | 4.75E-08 | 2.77E-07 | 8.055203 |
| HAUS4   | -0.38184 | 0.76746  | 7.798571 | -5.94494 | 4.77E-08 | 2.78E-07 | 8.051032 |
| SOWAHC  | -0.39796 | 0.75893  | 7.344945 | -5.94335 | 4.81E-08 | 2.80E-07 | 8.044229 |
| GDF9    | -0.22653 | 0.854687 | 5.174066 | -5.94275 | 4.82E-08 | 2.81E-07 | 8.041636 |
| APBA1   | -0.19785 | 0.871849 | 5.278901 | -5.94173 | 4.84E-08 | 2.82E-07 | 8.037259 |
| MAP3K12 | -0.18189 | 0.881545 | 6.534835 | -5.94118 | 4.85E-08 | 2.82E-07 | 8.034877 |
| CCDC70  | -0.20686 | 0.866424 | 4.119231 | -5.94117 | 4.85E-08 | 2.82E-07 | 8.034845 |

|          |          |          |          |          |          |          |          |
|----------|----------|----------|----------|----------|----------|----------|----------|
| NDUFS6   | 0.192797 | 1.142978 | 10.07121 | 5.940826 | 4.86E-08 | 2.82E-07 | 8.033359 |
| INPP5A   | 0.229188 | 1.172175 | 7.736813 | 5.93807  | 4.92E-08 | 2.85E-07 | 8.021515 |
| P3H1     | 0.215802 | 1.161349 | 6.477802 | 5.937724 | 4.93E-08 | 2.85E-07 | 8.02003  |
| RARRES1  | 1.135348 | 2.196715 | 5.862088 | 5.937702 | 4.93E-08 | 2.85E-07 | 8.019935 |
| PCDHGA1  | -0.24662 | 0.84287  | 4.49022  | -5.93734 | 4.94E-08 | 2.86E-07 | 8.018381 |
| DDX39A   | 0.295333 | 1.227168 | 6.896044 | 5.935427 | 4.98E-08 | 2.88E-07 | 8.010158 |
| OCEL1    | -0.24692 | 0.842695 | 8.266593 | -5.93475 | 4.99E-08 | 2.89E-07 | 8.007258 |
| PKM      | 0.463734 | 1.379107 | 8.497363 | 5.933942 | 5.01E-08 | 2.89E-07 | 8.003781 |
| LOC72916 | -0.17912 | 0.883241 | 4.810989 | -5.93376 | 5.01E-08 | 2.90E-07 | 8.003019 |
| SCAF8    | 0.2293   | 1.172266 | 7.651868 | 5.931518 | 5.06E-08 | 2.92E-07 | 7.993367 |
| RGR      | -0.20816 | 0.865641 | 4.50989  | -5.93133 | 5.07E-08 | 2.92E-07 | 7.992582 |
| PROL1    | -0.22493 | 0.855635 | 4.676813 | -5.92995 | 5.10E-08 | 2.94E-07 | 7.986634 |
| NCK2     | 0.187406 | 1.138714 | 7.875934 | 5.928548 | 5.13E-08 | 2.95E-07 | 7.980612 |
| CEP83    | 0.219406 | 1.164254 | 4.451758 | 5.92688  | 5.17E-08 | 2.97E-07 | 7.973454 |
| TREML2   | -0.2286  | 0.853463 | 5.51     | -5.9264  | 5.18E-08 | 2.98E-07 | 7.971407 |
| C11orf16 | -0.16957 | 0.889108 | 6.375495 | -5.92444 | 5.22E-08 | 3.00E-07 | 7.962978 |
| NEK11    | 0.218643 | 1.163638 | 6.057033 | 5.923843 | 5.24E-08 | 3.01E-07 | 7.960414 |
| PFKP     | 0.633401 | 1.551217 | 7.866264 | 5.922111 | 5.28E-08 | 3.03E-07 | 7.952979 |
| METTL1   | -0.34138 | 0.789285 | 8.139011 | -5.92106 | 5.30E-08 | 3.04E-07 | 7.94849  |
| CTRL     | -0.21354 | 0.862421 | 4.755275 | -5.92078 | 5.31E-08 | 3.04E-07 | 7.947275 |
| KLF15    | -0.29842 | 0.813145 | 6.843736 | -5.9204  | 5.32E-08 | 3.05E-07 | 7.945625 |
| ROGDI    | -0.35086 | 0.784119 | 7.688022 | -5.92018 | 5.32E-08 | 3.05E-07 | 7.944684 |
| OR10J1   | -0.19146 | 0.875717 | 5.069451 | -5.91945 | 5.34E-08 | 3.05E-07 | 7.941568 |
| COMMD9   | 0.177585 | 1.130989 | 8.259121 | 5.918866 | 5.35E-08 | 3.06E-07 | 7.939057 |
| PLD2     | -0.17521 | 0.88564  | 6.009011 | -5.91873 | 5.36E-08 | 3.06E-07 | 7.938492 |
| PELO     | 0.237271 | 1.17876  | 7.254505 | 5.917884 | 5.38E-08 | 3.07E-07 | 7.934841 |
| GPR162   | -0.18863 | 0.877437 | 5.338242 | -5.91725 | 5.39E-08 | 3.08E-07 | 7.932102 |
| RTKL1    | -0.21814 | 0.859673 | 7.365824 | -5.91648 | 5.41E-08 | 3.08E-07 | 7.92881  |
| NXPH3    | -0.24042 | 0.846499 | 6.782198 | -5.91363 | 5.48E-08 | 3.12E-07 | 7.916613 |
| SPAST    | 0.210932 | 1.157436 | 4.866264 | 5.91219  | 5.51E-08 | 3.14E-07 | 7.910416 |
| NOS1     | -0.19147 | 0.875711 | 5.509011 | -5.91168 | 5.53E-08 | 3.14E-07 | 7.90825  |
| TBX6     | -0.22326 | 0.85663  | 5.313077 | -5.91076 | 5.55E-08 | 3.16E-07 | 7.904298 |
| CDS1     | 0.271826 | 1.207335 | 5.996593 | 5.909556 | 5.58E-08 | 3.17E-07 | 7.899124 |
| MCM2     | 0.335469 | 1.261787 | 6.311978 | 5.90675  | 5.65E-08 | 3.21E-07 | 7.887092 |
| TIMM17A  | 0.153841 | 1.112527 | 7.588901 | 5.906439 | 5.66E-08 | 3.21E-07 | 7.885759 |
| PIP      | -0.15543 | 0.897868 | 6.139011 | -5.90442 | 5.71E-08 | 3.24E-07 | 7.877111 |
| SNW1     | 0.194024 | 1.14395  | 7.557033 | 5.903299 | 5.74E-08 | 3.25E-07 | 7.872301 |
| FERMT2   | -0.27712 | 0.825236 | 7.782527 | -5.90261 | 5.75E-08 | 3.26E-07 | 7.869354 |
| RMI1     | 0.251676 | 1.19059  | 6.18989  | 5.902225 | 5.76E-08 | 3.26E-07 | 7.867697 |
| AQR      | 0.213865 | 1.159791 | 7.13967  | 5.902092 | 5.77E-08 | 3.26E-07 | 7.867128 |
| FGF1     | -0.77661 | 0.583737 | 6.638571 | -5.90172 | 5.78E-08 | 3.26E-07 | 7.865525 |
| BTNL2    | -0.21934 | 0.858957 | 4.371099 | -5.90166 | 5.78E-08 | 3.26E-07 | 7.865281 |
| ITGB1BP1 | 0.263469 | 1.200361 | 6.226374 | 5.901632 | 5.78E-08 | 3.26E-07 | 7.865157 |
| AASDHPPT | 0.246406 | 1.186248 | 8.45011  | 5.900289 | 5.81E-08 | 3.28E-07 | 7.859404 |
| TSC22D3  | -0.80617 | 0.571897 | 8.823516 | -5.89795 | 5.87E-08 | 3.31E-07 | 7.849399 |
| SUCLG1   | -0.26855 | 0.830153 | 12.21242 | -5.89724 | 5.89E-08 | 3.32E-07 | 7.84635  |
| TUBB4A   | -0.2776  | 0.824963 | 5.410769 | -5.89711 | 5.89E-08 | 3.32E-07 | 7.845771 |

|          |          |          |          |          |          |          |          |
|----------|----------|----------|----------|----------|----------|----------|----------|
| CD151    | 0.455705 | 1.371453 | 7.802088 | 5.895303 | 5.94E-08 | 3.34E-07 | 7.83804  |
| CLPB     | -0.24741 | 0.842407 | 6.054176 | -5.89442 | 5.96E-08 | 3.35E-07 | 7.834279 |
| CTF1     | -0.28475 | 0.820882 | 6.195275 | -5.89383 | 5.98E-08 | 3.36E-07 | 7.831724 |
| KIRREL   | -0.17214 | 0.887528 | 4.828791 | -5.89315 | 6.00E-08 | 3.37E-07 | 7.828839 |
| DLGAP5   | 0.392531 | 1.312695 | 3.778022 | 5.891722 | 6.04E-08 | 3.39E-07 | 7.822708 |
| ZCCHC6   | 0.220836 | 1.165409 | 6.516813 | 5.889215 | 6.10E-08 | 3.42E-07 | 7.811973 |
| S1PR4    | -0.206   | 0.86694  | 5.848352 | -5.8878  | 6.14E-08 | 3.44E-07 | 7.805929 |
| EIF2B1   | 0.176246 | 1.12994  | 8.158242 | 5.887303 | 6.15E-08 | 3.45E-07 | 7.803788 |
| SERPINA6 | -0.81437 | 0.568658 | 8.630769 | -5.88596 | 6.19E-08 | 3.46E-07 | 7.798052 |
| GNG12    | 0.240164 | 1.181127 | 9.376154 | 5.885875 | 6.19E-08 | 3.46E-07 | 7.797675 |
| MKL2     | 0.267377 | 1.203617 | 7.384176 | 5.885504 | 6.20E-08 | 3.47E-07 | 7.796088 |
| IMPDH2   | 0.340014 | 1.265769 | 9.048791 | 5.885274 | 6.21E-08 | 3.47E-07 | 7.795102 |
| CYBA     | 0.391005 | 1.311306 | 9.818571 | 5.885009 | 6.22E-08 | 3.47E-07 | 7.79397  |
| CRTC3    | 0.219884 | 1.16464  | 7.803516 | 5.884368 | 6.23E-08 | 3.48E-07 | 7.791224 |
| RHOBTB1  | 0.514348 | 1.428348 | 8.7      | 5.884203 | 6.24E-08 | 3.48E-07 | 7.79052  |
| CRMP1    | -0.2076  | 0.865977 | 6.615385 | -5.88405 | 6.24E-08 | 3.48E-07 | 7.789853 |
| FRAT2    | 0.316043 | 1.244912 | 5.468242 | 5.883849 | 6.25E-08 | 3.48E-07 | 7.789006 |
| MMD      | 0.496367 | 1.410657 | 7.351978 | 5.883297 | 6.26E-08 | 3.48E-07 | 7.786643 |
| NFE2L2   | 0.262454 | 1.199517 | 9.32022  | 5.879166 | 6.38E-08 | 3.55E-07 | 7.768968 |
| GPR3     | -0.24644 | 0.842974 | 5.108352 | -5.87842 | 6.40E-08 | 3.55E-07 | 7.765779 |
| SLC39A1  | 0.212058 | 1.158339 | 7.487473 | 5.878342 | 6.40E-08 | 3.55E-07 | 7.765441 |
| MT1HL1   | -0.28883 | 0.818565 | 7.63978  | -5.87766 | 6.42E-08 | 3.56E-07 | 7.762515 |
| ZNF771   | -0.2341  | 0.850214 | 6.87967  | -5.87655 | 6.45E-08 | 3.58E-07 | 7.757781 |
| ZNF33B   | 0.311256 | 1.240787 | 6.12044  | 5.87641  | 6.46E-08 | 3.58E-07 | 7.75718  |
| ALAD     | -0.41276 | 0.751183 | 7.571538 | -5.87559 | 6.48E-08 | 3.59E-07 | 7.753691 |
| RPIA     | 0.2597   | 1.19723  | 6.874945 | 5.874376 | 6.52E-08 | 3.60E-07 | 7.748482 |
| HSD17B14 | -0.41883 | 0.748031 | 7.915495 | -5.87436 | 6.52E-08 | 3.60E-07 | 7.748413 |
| USP33    | 0.19042  | 1.141096 | 8.163077 | 5.874051 | 6.52E-08 | 3.61E-07 | 7.747091 |
| RHOF     | 0.312415 | 1.241785 | 6.443187 | 5.873682 | 6.54E-08 | 3.61E-07 | 7.745513 |
| ACTR6    | 0.277411 | 1.212018 | 6.990659 | 5.872203 | 6.58E-08 | 3.63E-07 | 7.739189 |
| FPGT     | 0.283406 | 1.217065 | 5.943407 | 5.872109 | 6.58E-08 | 3.63E-07 | 7.738787 |
| SEMA4G   | -0.21471 | 0.861722 | 5.792088 | -5.87171 | 6.59E-08 | 3.63E-07 | 7.737075 |
| METTL18  | 0.266652 | 1.203013 | 5.721209 | 5.871328 | 6.60E-08 | 3.64E-07 | 7.735447 |
| GDAP2    | -0.20665 | 0.866546 | 5.438462 | -5.87097 | 6.61E-08 | 3.64E-07 | 7.733932 |
| CCT8     | 0.219604 | 1.164414 | 11.33077 | 5.870948 | 6.61E-08 | 3.64E-07 | 7.733823 |
| APOBEC3F | 0.243638 | 1.183974 | 4.254176 | 5.86987  | 6.65E-08 | 3.65E-07 | 7.729215 |
| SRD5A2   | -0.22554 | 0.855277 | 5.379341 | -5.869   | 6.67E-08 | 3.66E-07 | 7.725513 |
| GNAS     | 0.198082 | 1.147172 | 11.18165 | 5.868732 | 6.68E-08 | 3.67E-07 | 7.724351 |
| SLC34A1  | -0.7245  | 0.605208 | 8.949341 | -5.86686 | 6.73E-08 | 3.69E-07 | 7.716356 |
| PYCR1    | -0.20647 | 0.866656 | 6.406813 | -5.86675 | 6.74E-08 | 3.69E-07 | 7.715859 |
| RHOC     | 0.268425 | 1.204492 | 9.991868 | 5.866488 | 6.75E-08 | 3.69E-07 | 7.714759 |
| NPC1L1   | -0.19824 | 0.871612 | 4.801099 | -5.86641 | 6.75E-08 | 3.69E-07 | 7.71444  |
| USP1     | 0.260357 | 1.197775 | 7.244835 | 5.866321 | 6.75E-08 | 3.69E-07 | 7.714046 |
| MAPK8IP2 | -0.19485 | 0.873667 | 4.935604 | -5.86474 | 6.80E-08 | 3.72E-07 | 7.707311 |
| CYFIP2   | -0.44208 | 0.736074 | 9.087912 | -5.86433 | 6.81E-08 | 3.72E-07 | 7.705545 |
| ATP9A    | 0.407657 | 1.32653  | 6.726154 | 5.863753 | 6.83E-08 | 3.73E-07 | 7.703072 |
| KIF2A    | 0.199729 | 1.148483 | 5.386593 | 5.859955 | 6.94E-08 | 3.79E-07 | 7.686847 |

|          |          |          |          |          |          |          |          |
|----------|----------|----------|----------|----------|----------|----------|----------|
| GUCA1B   | -0.16989 | 0.888908 | 4.870769 | -5.85751 | 7.02E-08 | 3.83E-07 | 7.676385 |
| HOXB1    | -0.27835 | 0.824532 | 5.816484 | -5.85598 | 7.06E-08 | 3.85E-07 | 7.669855 |
| RBFOX2   | 0.22471  | 1.168542 | 7.293077 | 5.853834 | 7.13E-08 | 3.88E-07 | 7.660706 |
| C1orf105 | -0.23772 | 0.848082 | 5.224835 | -5.85265 | 7.17E-08 | 3.90E-07 | 7.655662 |
| ST3GAL6  | -0.22155 | 0.857646 | 5.180879 | -5.85263 | 7.17E-08 | 3.90E-07 | 7.655583 |
| TCF12    | 0.244464 | 1.184652 | 8.141758 | 5.851805 | 7.20E-08 | 3.91E-07 | 7.652044 |
| FSCN3    | -0.20927 | 0.864974 | 5.199341 | -5.85097 | 7.22E-08 | 3.92E-07 | 7.64849  |
| CDC25B   | 0.412874 | 1.331336 | 6.643516 | 5.850388 | 7.24E-08 | 3.93E-07 | 7.645995 |
| RBM4B    | 0.308444 | 1.238372 | 6.922527 | 5.850365 | 7.24E-08 | 3.93E-07 | 7.6459   |
| DENND5B  | -0.18075 | 0.882242 | 4.346703 | -5.84806 | 7.31E-08 | 3.97E-07 | 7.636073 |
| CLUHP3   | -0.27373 | 0.827176 | 6.536593 | -5.84743 | 7.34E-08 | 3.98E-07 | 7.633367 |
| PDIA5    | 0.363937 | 1.286933 | 7.237143 | 5.845817 | 7.39E-08 | 4.00E-07 | 7.62649  |
| OLFML2A  | -0.29958 | 0.812489 | 6.080769 | -5.8438  | 7.45E-08 | 4.03E-07 | 7.617899 |
| STK26    | 0.313488 | 1.242708 | 4.251978 | 5.843577 | 7.46E-08 | 4.04E-07 | 7.616934 |
| ARMCX1   | 0.309826 | 1.239558 | 7.745385 | 5.841225 | 7.54E-08 | 4.07E-07 | 7.6069   |
| LGALS3BP | 0.414918 | 1.333223 | 8.616484 | 5.841031 | 7.54E-08 | 4.08E-07 | 7.606075 |
| KRT19    | 0.785918 | 1.724189 | 7.904945 | 5.838737 | 7.62E-08 | 4.11E-07 | 7.596288 |
| CFAP20   | 0.197179 | 1.146454 | 8.660549 | 5.837928 | 7.65E-08 | 4.13E-07 | 7.592838 |
| SUN2     | -0.23042 | 0.852387 | 8.177143 | -5.83426 | 7.77E-08 | 4.19E-07 | 7.57721  |
| UNC5C    | -0.15619 | 0.89739  | 4.264066 | -5.83406 | 7.78E-08 | 4.19E-07 | 7.576358 |
| WARS2    | 0.283058 | 1.216771 | 6.117582 | 5.833141 | 7.81E-08 | 4.21E-07 | 7.572431 |
| PNLIP    | -0.16754 | 0.890362 | 4.278022 | -5.83228 | 7.84E-08 | 4.22E-07 | 7.56876  |
| SEC24C   | 0.205778 | 1.153308 | 7.501758 | 5.830016 | 7.92E-08 | 4.26E-07 | 7.55911  |
| LSM7     | 0.311101 | 1.240655 | 8.033407 | 5.829417 | 7.94E-08 | 4.27E-07 | 7.556559 |
| FASTKD1  | 0.316333 | 1.245162 | 8.031429 | 5.828544 | 7.97E-08 | 4.28E-07 | 7.552841 |
| CDK2AP1  | 0.250169 | 1.189346 | 9.931319 | 5.825938 | 8.06E-08 | 4.33E-07 | 7.541735 |
| SPECC1L  | 0.215058 | 1.160751 | 6.873956 | 5.825675 | 8.07E-08 | 4.33E-07 | 7.540615 |
| ZBTB32   | -0.17581 | 0.885269 | 4.061538 | -5.82551 | 8.08E-08 | 4.33E-07 | 7.539922 |
| ARL2     | -0.20581 | 0.867054 | 9.096923 | -5.82472 | 8.10E-08 | 4.34E-07 | 7.536548 |
| TPD52L2  | 0.205536 | 1.153115 | 8.110769 | 5.82451  | 8.11E-08 | 4.34E-07 | 7.535652 |
| ALDOA    | 0.186227 | 1.137784 | 11.23231 | 5.823137 | 8.16E-08 | 4.37E-07 | 7.529805 |
| GSTM5    | -0.29428 | 0.815482 | 5.802088 | -5.82207 | 8.20E-08 | 4.38E-07 | 7.525253 |
| DCT      | -0.18117 | 0.881985 | 4.747582 | -5.8207  | 8.25E-08 | 4.41E-07 | 7.519419 |
| DLEU1    | -0.28188 | 0.822519 | 7.566044 | -5.82026 | 8.26E-08 | 4.41E-07 | 7.517544 |
| F11R     | 0.208729 | 1.15567  | 7.136044 | 5.820237 | 8.27E-08 | 4.41E-07 | 7.517456 |
| CPSF6    | 0.195285 | 1.14495  | 6.474396 | 5.816759 | 8.39E-08 | 4.48E-07 | 7.502647 |
| CDC20    | 0.633966 | 1.551825 | 5.061978 | 5.813667 | 8.51E-08 | 4.53E-07 | 7.489486 |
| VSIG4    | 0.778261 | 1.715062 | 6.346593 | 5.812906 | 8.54E-08 | 4.55E-07 | 7.486246 |
| MALT1    | 0.436203 | 1.353039 | 6.214835 | 5.810839 | 8.61E-08 | 4.59E-07 | 7.477449 |
| AKAP13   | -0.27781 | 0.824844 | 6.461319 | -5.81021 | 8.64E-08 | 4.59E-07 | 7.474775 |
| IPO4     | 0.314415 | 1.243508 | 6.194176 | 5.810163 | 8.64E-08 | 4.59E-07 | 7.474574 |
| SNX7     | 0.264952 | 1.201596 | 9.073846 | 5.806093 | 8.79E-08 | 4.67E-07 | 7.45726  |
| APOBEC2  | -0.23386 | 0.850357 | 5.160659 | -5.80422 | 8.87E-08 | 4.71E-07 | 7.449276 |
| THEM6    | -0.2536  | 0.838801 | 6.812637 | -5.80277 | 8.92E-08 | 4.73E-07 | 7.443134 |
| GJC2     | -0.22429 | 0.856013 | 6.235824 | -5.80272 | 8.92E-08 | 4.73E-07 | 7.442918 |
| ALDH7A1  | -0.272   | 0.828173 | 6.325714 | -5.80218 | 8.95E-08 | 4.74E-07 | 7.440617 |
| NGF      | -0.24081 | 0.846272 | 5.104615 | -5.80115 | 8.99E-08 | 4.76E-07 | 7.436255 |

|          |          |          |          |          |          |          |          |
|----------|----------|----------|----------|----------|----------|----------|----------|
| ADIPOR1  | -0.24601 | 0.843225 | 8.307912 | -5.8003  | 9.02E-08 | 4.77E-07 | 7.432642 |
| ECI2     | -0.31032 | 0.806461 | 10.60198 | -5.7973  | 9.14E-08 | 4.83E-07 | 7.419856 |
| TFAP4    | -0.22774 | 0.853972 | 6.529121 | -5.7966  | 9.17E-08 | 4.85E-07 | 7.416897 |
| C8orf33  | 0.329763 | 1.256807 | 6.022418 | 5.794288 | 9.26E-08 | 4.89E-07 | 7.407072 |
| DTX4     | 0.374976 | 1.296818 | 8.079341 | 5.793595 | 9.29E-08 | 4.90E-07 | 7.404124 |
| TBC1D16  | 0.333894 | 1.260411 | 6.44033  | 5.793042 | 9.31E-08 | 4.91E-07 | 7.401776 |
| PVALB    | -0.98908 | 0.5038   | 7.762418 | -5.79034 | 9.42E-08 | 4.97E-07 | 7.390282 |
| WNT2     | -0.2124  | 0.8631   | 5.496923 | -5.7899  | 9.44E-08 | 4.98E-07 | 7.388425 |
| CSNK1G3  | 0.259072 | 1.196709 | 6.866374 | 5.787115 | 9.56E-08 | 5.03E-07 | 7.376599 |
| CRNKL1   | 0.294019 | 1.226051 | 7.176264 | 5.780682 | 9.83E-08 | 5.17E-07 | 7.349286 |
| PLXNA2   | -0.22181 | 0.857488 | 5.718791 | -5.77771 | 9.96E-08 | 5.24E-07 | 7.336651 |
| NXN      | 0.290188 | 1.2228   | 6.271978 | 5.776807 | 1.00E-07 | 5.26E-07 | 7.33284  |
| HOXA10   | 0.234638 | 1.176611 | 6.954725 | 5.775526 | 1.01E-07 | 5.28E-07 | 7.327402 |
| CD53     | 0.747502 | 1.678884 | 7.697253 | 5.775012 | 1.01E-07 | 5.29E-07 | 7.325221 |
| PDE10A   | -0.17121 | 0.888099 | 4.800989 | -5.77163 | 1.02E-07 | 5.37E-07 | 7.310858 |
| PNPLA2   | -0.17743 | 0.884277 | 7.347912 | -5.76885 | 1.04E-07 | 5.43E-07 | 7.299066 |
| CXCL6    | 1.506957 | 2.842098 | 4.768242 | 5.767982 | 1.04E-07 | 5.45E-07 | 7.295404 |
| SDPR     | -0.31864 | 0.801827 | 5.323736 | -5.76747 | 1.04E-07 | 5.45E-07 | 7.293247 |
| IL1RAPL1 | -0.23517 | 0.849583 | 4.820879 | -5.76739 | 1.04E-07 | 5.45E-07 | 7.292881 |
| RNASET2  | 0.347343 | 1.272215 | 8.122198 | 5.766221 | 1.05E-07 | 5.48E-07 | 7.287937 |
| STARD8   | -0.29918 | 0.812715 | 6.939011 | -5.76499 | 1.05E-07 | 5.50E-07 | 7.282705 |
| RTP4     | 0.514517 | 1.428516 | 5.517692 | 5.764732 | 1.05E-07 | 5.51E-07 | 7.281622 |
| PRLH     | -0.28961 | 0.818121 | 5.434176 | -5.76399 | 1.06E-07 | 5.52E-07 | 7.278471 |
| MSH6     | 0.308232 | 1.238189 | 6.682857 | 5.758956 | 1.08E-07 | 5.64E-07 | 7.257141 |
| ATP13A3  | 0.25056  | 1.189669 | 7.629121 | 5.75847  | 1.08E-07 | 5.65E-07 | 7.255082 |
| LDLR     | -0.5087  | 0.702858 | 5.257143 | -5.753   | 1.11E-07 | 5.78E-07 | 7.231895 |
| IDH3B    | -0.16903 | 0.889441 | 9.25011  | -5.75281 | 1.11E-07 | 5.78E-07 | 7.231091 |
| UBE2A    | 0.175783 | 1.129577 | 8.307143 | 5.751562 | 1.12E-07 | 5.81E-07 | 7.225819 |
| C1orf68  | -0.20073 | 0.87011  | 5.447912 | -5.75109 | 1.12E-07 | 5.82E-07 | 7.223839 |
| RAB31L1  | -0.22644 | 0.854742 | 7.088242 | -5.75052 | 1.12E-07 | 5.83E-07 | 7.221398 |
| SSB      | 0.248816 | 1.188232 | 7.62978  | 5.749368 | 1.13E-07 | 5.86E-07 | 7.21653  |
| ZNF43    | 0.206565 | 1.153938 | 5.717582 | 5.749208 | 1.13E-07 | 5.86E-07 | 7.215852 |
| FN3K     | -0.22123 | 0.857836 | 4.205385 | -5.74871 | 1.13E-07 | 5.87E-07 | 7.213729 |
| TRAJ28   | -0.28069 | 0.823197 | 7.50011  | -5.74774 | 1.13E-07 | 5.89E-07 | 7.209655 |
| TMEM123  | 0.332754 | 1.259415 | 8.628462 | 5.746963 | 1.14E-07 | 5.90E-07 | 7.206348 |
| TRPV5    | -0.24313 | 0.844913 | 5.249121 | -5.74686 | 1.14E-07 | 5.90E-07 | 7.205903 |
| NTRK3    | -0.19699 | 0.872369 | 5.618022 | -5.74664 | 1.14E-07 | 5.90E-07 | 7.204964 |
| COL5A2   | 0.234541 | 1.176532 | 4.71033  | 5.746226 | 1.14E-07 | 5.91E-07 | 7.203229 |
| GPI      | 0.230836 | 1.173515 | 9.831758 | 5.744267 | 1.15E-07 | 5.96E-07 | 7.194938 |
| MS4A6A   | 0.667585 | 1.588411 | 6.741429 | 5.742896 | 1.16E-07 | 5.99E-07 | 7.189135 |
| OVOL3    | -0.21288 | 0.862814 | 5.295165 | -5.74136 | 1.17E-07 | 6.03E-07 | 7.182635 |
| SEMA3B   | -0.32027 | 0.80092  | 7.249451 | -5.73833 | 1.18E-07 | 6.10E-07 | 7.16983  |
| COLEC11  | -0.52405 | 0.695418 | 9.168681 | -5.73823 | 1.18E-07 | 6.10E-07 | 7.169393 |
| VLDLR    | 0.333889 | 1.260406 | 6.52011  | 5.736814 | 1.19E-07 | 6.14E-07 | 7.163401 |
| SNAP23   | 0.26001  | 1.197487 | 6.789011 | 5.732665 | 1.21E-07 | 6.24E-07 | 7.145858 |
| KITLG    | 0.309116 | 1.238948 | 4.693077 | 5.730965 | 1.22E-07 | 6.29E-07 | 7.13867  |
| ATAT1    | -0.23626 | 0.848943 | 5.611429 | -5.7307  | 1.22E-07 | 6.29E-07 | 7.137565 |

|           |          |          |          |          |          |          |          |
|-----------|----------|----------|----------|----------|----------|----------|----------|
| FAAH      | -0.30929 | 0.807042 | 6.469231 | -5.73023 | 1.22E-07 | 6.30E-07 | 7.135566 |
| MTNR1A    | -0.47877 | 0.717588 | 5.088462 | -5.73002 | 1.23E-07 | 6.30E-07 | 7.134681 |
| DDX47     | 0.172208 | 1.126781 | 9.054505 | 5.729299 | 1.23E-07 | 6.32E-07 | 7.131625 |
| CNTNAP1   | -0.19794 | 0.871793 | 5.584725 | -5.72804 | 1.24E-07 | 6.35E-07 | 7.126303 |
| HCLS1     | 0.654222 | 1.573767 | 6.083516 | 5.727784 | 1.24E-07 | 6.35E-07 | 7.125223 |
| CIC       | -0.21567 | 0.861145 | 7.078132 | -5.72725 | 1.24E-07 | 6.36E-07 | 7.122969 |
| TCIRG1    | 0.327981 | 1.255255 | 5.431319 | 5.726771 | 1.24E-07 | 6.37E-07 | 7.120943 |
| ABCC8     | -0.24249 | 0.845284 | 5.047912 | -5.72499 | 1.25E-07 | 6.42E-07 | 7.113403 |
| MYL7      | -0.22418 | 0.856082 | 5.761099 | -5.72442 | 1.26E-07 | 6.43E-07 | 7.110987 |
| TM4SF5    | -0.39149 | 0.76234  | 8.299231 | -5.72122 | 1.27E-07 | 6.52E-07 | 7.097507 |
| LYPD1     | 0.492145 | 1.406534 | 5.22989  | 5.72082  | 1.28E-07 | 6.52E-07 | 7.095798 |
| AHR       | 0.308217 | 1.238177 | 6.552198 | 5.720507 | 1.28E-07 | 6.53E-07 | 7.094476 |
| C1QB      | 0.940889 | 1.919711 | 6.005275 | 5.720037 | 1.28E-07 | 6.54E-07 | 7.092488 |
| PDE1B     | -0.20701 | 0.866331 | 5.522198 | -5.71795 | 1.29E-07 | 6.59E-07 | 7.083667 |
| KCNA6     | -0.22393 | 0.856231 | 5.232527 | -5.71696 | 1.30E-07 | 6.62E-07 | 7.079474 |
| ACTR10    | 0.204855 | 1.152571 | 9.71978  | 5.715486 | 1.31E-07 | 6.66E-07 | 7.07327  |
| PIGL      | -0.28663 | 0.819813 | 5.69978  | -5.71533 | 1.31E-07 | 6.66E-07 | 7.072609 |
| CEBPA-AS1 | -0.24571 | 0.843398 | 6.491319 | -5.71079 | 1.33E-07 | 6.79E-07 | 7.053457 |
| CAPG      | 0.522628 | 1.43657  | 8.156703 | 5.709646 | 1.34E-07 | 6.81E-07 | 7.048618 |
| SAMD4B    | -0.22342 | 0.856532 | 5.935604 | -5.70955 | 1.34E-07 | 6.81E-07 | 7.048223 |
| CYP2C8    | -0.55683 | 0.679796 | 4.157473 | -5.70785 | 1.35E-07 | 6.86E-07 | 7.041035 |
| CCL25     | -0.26489 | 0.83226  | 4.668791 | -5.70705 | 1.35E-07 | 6.88E-07 | 7.03767  |
| LRRC16A   | 0.379246 | 1.300662 | 7.623626 | 5.704738 | 1.37E-07 | 6.95E-07 | 7.02791  |
| HLA-DPA1  | 0.76901  | 1.7041   | 9.625714 | 5.704186 | 1.37E-07 | 6.96E-07 | 7.025582 |
| ROBO4     | -0.16745 | 0.890416 | 5.651978 | -5.70366 | 1.38E-07 | 6.97E-07 | 7.023378 |
| ACTL6A    | 0.287295 | 1.22035  | 5.94033  | 5.702667 | 1.38E-07 | 7.00E-07 | 7.019172 |
| UGCG      | 0.593749 | 1.509163 | 7.962308 | 5.699581 | 1.40E-07 | 7.09E-07 | 7.006158 |
| ITPA      | 0.227353 | 1.170685 | 8.363297 | 5.696342 | 1.42E-07 | 7.18E-07 | 6.992502 |
| CLCN1     | -0.20411 | 0.868073 | 5.074066 | -5.69439 | 1.43E-07 | 7.24E-07 | 6.984291 |
| P3H4      | 0.232367 | 1.174761 | 5.321429 | 5.694326 | 1.43E-07 | 7.24E-07 | 6.984007 |
| NOS2      | -0.30857 | 0.807442 | 5.831758 | -5.69337 | 1.44E-07 | 7.26E-07 | 6.979981 |
| P2RY4     | -0.18901 | 0.877205 | 4.600879 | -5.69216 | 1.45E-07 | 7.30E-07 | 6.974858 |
| THBS4     | -0.26687 | 0.831118 | 5.388681 | -5.68844 | 1.47E-07 | 7.41E-07 | 6.959191 |
| PIWIL2    | -0.20041 | 0.870303 | 4.442418 | -5.68815 | 1.47E-07 | 7.42E-07 | 6.958001 |
| C5orf15   | 0.19858  | 1.147568 | 9.704286 | 5.685482 | 1.49E-07 | 7.50E-07 | 6.946744 |
| ADI1      | -0.39646 | 0.759721 | 11.4433  | -5.68509 | 1.49E-07 | 7.51E-07 | 6.945089 |
| NKX2-5    | -0.19667 | 0.872564 | 5.202747 | -5.68217 | 1.51E-07 | 7.60E-07 | 6.932786 |
| CAV3      | -0.1933  | 0.874603 | 6.405934 | -5.68189 | 1.51E-07 | 7.60E-07 | 6.931601 |
| PCDH1     | -0.19025 | 0.876456 | 5.224835 | -5.67855 | 1.53E-07 | 7.71E-07 | 6.917574 |
| DIMT1     | 0.186986 | 1.138383 | 7.086813 | 5.67839  | 1.53E-07 | 7.71E-07 | 6.916882 |
| HOPX      | 0.657261 | 1.577085 | 5.911758 | 5.675398 | 1.55E-07 | 7.81E-07 | 6.904291 |
| ATIC      | 0.217324 | 1.162575 | 8.817033 | 5.67448  | 1.56E-07 | 7.83E-07 | 6.900429 |
| HPRT1     | 0.298696 | 1.230032 | 8.419011 | 5.673876 | 1.57E-07 | 7.85E-07 | 6.897886 |
| KLK6      | -0.46502 | 0.724461 | 5.664176 | -5.6734  | 1.57E-07 | 7.86E-07 | 6.895898 |
| DSCR4     | -0.22615 | 0.854911 | 5.411209 | -5.67278 | 1.57E-07 | 7.88E-07 | 6.893292 |
| TMEM186   | 0.202715 | 1.150862 | 6.882418 | 5.67256  | 1.57E-07 | 7.88E-07 | 6.892348 |
| POP7      | 0.210053 | 1.156731 | 7.656264 | 5.671718 | 1.58E-07 | 7.90E-07 | 6.888808 |

|          |          |          |          |          |          |          |          |
|----------|----------|----------|----------|----------|----------|----------|----------|
| MPZL2    | 0.246203 | 1.186081 | 4.870879 | 5.671599 | 1.58E-07 | 7.90E-07 | 6.888306 |
| PDCD2    | 0.199353 | 1.148183 | 5.779451 | 5.671481 | 1.58E-07 | 7.90E-07 | 6.88781  |
| F3       | -0.62829 | 0.646945 | 6.116484 | -5.67109 | 1.58E-07 | 7.91E-07 | 6.886181 |
| C3orf36  | -0.17547 | 0.885477 | 4.706923 | -5.66979 | 1.59E-07 | 7.95E-07 | 6.88071  |
| LHFP     | 0.531937 | 1.445869 | 6.82022  | 5.668769 | 1.60E-07 | 7.98E-07 | 6.876402 |
| PDCD1    | -0.22636 | 0.854787 | 5.741758 | -5.66857 | 1.60E-07 | 7.98E-07 | 6.875553 |
| CRYAB    | 0.625338 | 1.542572 | 11.49945 | 5.663574 | 1.64E-07 | 8.15E-07 | 6.854559 |
| ZFYVE21  | 0.244174 | 1.184414 | 6.778571 | 5.662114 | 1.65E-07 | 8.20E-07 | 6.84842  |
| ERN2     | -0.22714 | 0.85433  | 5.856593 | -5.66156 | 1.65E-07 | 8.21E-07 | 6.846079 |
| KCNQ1DN  | -0.19508 | 0.873526 | 5.535055 | -5.66125 | 1.65E-07 | 8.22E-07 | 6.844785 |
| GNMT     | -0.24146 | 0.845887 | 4.894725 | -5.66101 | 1.65E-07 | 8.22E-07 | 6.843793 |
| HBB      | 1.683222 | 3.211444 | 8.817363 | 5.658005 | 1.68E-07 | 8.32E-07 | 6.831154 |
| HRAS     | 0.269995 | 1.205804 | 6.633297 | 5.657992 | 1.68E-07 | 8.32E-07 | 6.831097 |
| FEZ2     | 0.198527 | 1.147526 | 8.841868 | 5.657508 | 1.68E-07 | 8.34E-07 | 6.829065 |
| YBX2     | -0.19686 | 0.872445 | 5.393736 | -5.65707 | 1.68E-07 | 8.35E-07 | 6.827204 |
| FHL1     | 0.529928 | 1.443857 | 6.338791 | 5.654916 | 1.70E-07 | 8.42E-07 | 6.818173 |
| LEPROTL1 | 0.258899 | 1.196565 | 8.328462 | 5.65454  | 1.70E-07 | 8.43E-07 | 6.816597 |
| TACR2    | -0.2257  | 0.855183 | 5.362088 | -5.65385 | 1.71E-07 | 8.45E-07 | 6.813683 |
| PTS      | 0.201667 | 1.150026 | 9.204725 | 5.653424 | 1.71E-07 | 8.46E-07 | 6.811908 |
| ITGA7    | -0.2184  | 0.859518 | 6.153956 | -5.65264 | 1.72E-07 | 8.48E-07 | 6.808629 |
| RFC2     | 0.219952 | 1.164695 | 5.906593 | 5.652011 | 1.72E-07 | 8.50E-07 | 6.805975 |
| CAV2     | 0.537019 | 1.450972 | 6.281429 | 5.651671 | 1.72E-07 | 8.51E-07 | 6.804545 |
| LOC10192 | -0.20831 | 0.865548 | 4.562857 | -5.6504  | 1.73E-07 | 8.55E-07 | 6.799204 |
| SPRY4    | -0.3205  | 0.800794 | 6.399121 | -5.65031 | 1.73E-07 | 8.55E-07 | 6.798843 |
| LCN2     | 1.011734 | 2.016334 | 5.828352 | 5.647363 | 1.76E-07 | 8.65E-07 | 6.786457 |
| ADM2     | -0.22968 | 0.852823 | 6.640769 | -5.64439 | 1.78E-07 | 8.76E-07 | 6.773977 |
| KPNB1    | 0.243826 | 1.184129 | 8.772747 | 5.643348 | 1.79E-07 | 8.80E-07 | 6.769604 |
| ARFGAP3  | 0.28013  | 1.214305 | 7.884396 | 5.642227 | 1.80E-07 | 8.83E-07 | 6.7649   |
| SMCO4    | 0.369285 | 1.291713 | 7.93044  | 5.64111  | 1.80E-07 | 8.87E-07 | 6.760211 |
| AP2B1    | 0.231357 | 1.173939 | 8.435495 | 5.640104 | 1.81E-07 | 8.90E-07 | 6.755991 |
| PSORS1C2 | -0.22204 | 0.857353 | 5.268462 | -5.6381  | 1.83E-07 | 8.98E-07 | 6.74758  |
| CCDC91   | 0.248763 | 1.188188 | 6.557363 | 5.637473 | 1.83E-07 | 9.00E-07 | 6.744953 |
| CHI3L1   | -0.80729 | 0.571452 | 5.762527 | -5.63675 | 1.84E-07 | 9.02E-07 | 6.741903 |
| NFKB1    | 0.249092 | 1.188459 | 7.592308 | 5.633375 | 1.87E-07 | 9.15E-07 | 6.727768 |
| LTBP2    | -0.27953 | 0.823861 | 6.503077 | -5.63288 | 1.87E-07 | 9.16E-07 | 6.72568  |
| SEMA6B   | -0.18139 | 0.881852 | 5.507692 | -5.63252 | 1.87E-07 | 9.17E-07 | 6.724179 |
| OGFOD1   | 0.219647 | 1.164449 | 7.322747 | 5.63226  | 1.87E-07 | 9.17E-07 | 6.723092 |
| RUVBL1   | 0.201092 | 1.149568 | 7.708571 | 5.631972 | 1.88E-07 | 9.18E-07 | 6.721885 |
| MORN1    | -0.21389 | 0.862207 | 5.299011 | -5.63153 | 1.88E-07 | 9.19E-07 | 6.720036 |
| RTN3     | 0.253517 | 1.19211  | 9.493626 | 5.627895 | 1.91E-07 | 9.33E-07 | 6.704795 |
| PTPN3    | 0.223    | 1.167158 | 8.335275 | 5.627732 | 1.91E-07 | 9.33E-07 | 6.704111 |
| RAI2     | 0.340454 | 1.266155 | 6.088791 | 5.62559  | 1.93E-07 | 9.42E-07 | 6.695139 |
| POSTN    | 1.146807 | 2.214233 | 6.133407 | 5.625345 | 1.93E-07 | 9.42E-07 | 6.694112 |
| SLC6A4   | -0.18974 | 0.876761 | 5.177692 | -5.62528 | 1.93E-07 | 9.42E-07 | 6.693829 |
| ITGB2    | 0.64099  | 1.559399 | 5.891538 | 5.624119 | 1.94E-07 | 9.46E-07 | 6.688974 |
| PGC      | -0.18461 | 0.879888 | 4.951319 | -5.62342 | 1.95E-07 | 9.48E-07 | 6.686039 |
| LTK      | -0.18751 | 0.878119 | 4.859231 | -5.62268 | 1.95E-07 | 9.51E-07 | 6.682945 |



|          |          |          |          |          |          |          |          |
|----------|----------|----------|----------|----------|----------|----------|----------|
| CUL1     | 0.211628 | 1.157994 | 7.117912 | 5.621911 | 1.96E-07 | 9.53E-07 | 6.679723 |
| PLOD3    | 0.21928  | 1.164153 | 8.606044 | 5.619335 | 1.98E-07 | 9.63E-07 | 6.668932 |
| ISOC2    | -0.31706 | 0.802705 | 8.905604 | -5.61867 | 1.99E-07 | 9.65E-07 | 6.666158 |
| C19orf73 | -0.16677 | 0.890833 | 4.812747 | -5.61866 | 1.99E-07 | 9.65E-07 | 6.666125 |
| KIAA0196 | 0.189372 | 1.140267 | 7.555385 | 5.617683 | 2.00E-07 | 9.69E-07 | 6.662014 |
| TWF2     | 0.276826 | 1.211527 | 6.694066 | 5.616886 | 2.00E-07 | 9.71E-07 | 6.658676 |
| HBQ1     | -0.2296  | 0.852869 | 5.104286 | -5.61679 | 2.00E-07 | 9.71E-07 | 6.658271 |
| PCOLCE2  | -0.96361 | 0.512771 | 5.620879 | -5.61665 | 2.00E-07 | 9.71E-07 | 6.657703 |
| TM9SF2   | 0.215213 | 1.160875 | 10.35099 | 5.611706 | 2.05E-07 | 9.92E-07 | 6.636993 |
| EMX1     | -0.26905 | 0.829867 | 6.24978  | -5.61136 | 2.05E-07 | 9.93E-07 | 6.635535 |
| DUSP22   | 0.228826 | 1.171881 | 7.70033  | 5.611109 | 2.05E-07 | 9.93E-07 | 6.634494 |
| CALM1    | -0.23306 | 0.85083  | 10.21714 | -5.6081  | 2.08E-07 | 1.00E-06 | 6.621889 |
| MAN2B1   | 0.338488 | 1.264431 | 7.089341 | 5.608019 | 2.08E-07 | 1.00E-06 | 6.621567 |
| ZNF574   | -0.19348 | 0.874492 | 6.727582 | -5.60799 | 2.08E-07 | 1.00E-06 | 6.62143  |
| MPPE1    | 0.213164 | 1.159228 | 8.517802 | 5.607342 | 2.09E-07 | 1.01E-06 | 6.618734 |
| WT1      | -0.4294  | 0.74257  | 5.674615 | -5.60553 | 2.10E-07 | 1.01E-06 | 6.611164 |
| ANKH     | -0.16123 | 0.894261 | 4.614835 | -5.60389 | 2.12E-07 | 1.02E-06 | 6.604276 |
| PBLD     | -0.36455 | 0.776713 | 10.95516 | -5.60287 | 2.13E-07 | 1.03E-06 | 6.600041 |
| HSPA4    | 0.227889 | 1.17112  | 7.447692 | 5.602402 | 2.13E-07 | 1.03E-06 | 6.59807  |
| PPL      | 0.385541 | 1.30635  | 6.6      | 5.601449 | 2.14E-07 | 1.03E-06 | 6.594087 |
| ETV7     | -0.21951 | 0.858856 | 5.633407 | -5.59952 | 2.16E-07 | 1.04E-06 | 6.586037 |
| VSIG10   | 0.208585 | 1.155554 | 5.189451 | 5.597959 | 2.17E-07 | 1.04E-06 | 6.579495 |
| RRBP1    | 0.219386 | 1.164238 | 7.370879 | 5.597747 | 2.18E-07 | 1.04E-06 | 6.578608 |
| ATP4A    | -0.19711 | 0.872296 | 4.492527 | -5.59675 | 2.18E-07 | 1.05E-06 | 6.57446  |
| PDIA3    | 0.365232 | 1.288089 | 9.286044 | 5.596254 | 2.19E-07 | 1.05E-06 | 6.572366 |
| ZNF839   | -0.15202 | 0.899987 | 5.653736 | -5.59362 | 2.21E-07 | 1.06E-06 | 6.561367 |
| LTBP4    | -0.19472 | 0.873743 | 4.931319 | -5.59301 | 2.22E-07 | 1.06E-06 | 6.558823 |
| REG1A    | 1.471242 | 2.772604 | 5.733407 | 5.592496 | 2.23E-07 | 1.07E-06 | 6.556664 |
| ITGA10   | -0.21901 | 0.859155 | 5.636264 | -5.59195 | 2.23E-07 | 1.07E-06 | 6.554378 |
| JUND     | -0.37485 | 0.771188 | 6.086593 | -5.59139 | 2.24E-07 | 1.07E-06 | 6.552033 |
| MMP17    | -0.20268 | 0.868937 | 5.339341 | -5.58983 | 2.25E-07 | 1.08E-06 | 6.545508 |
| A2M      | 0.550947 | 1.465047 | 9.795055 | 5.589236 | 2.26E-07 | 1.08E-06 | 6.543045 |
| UPK2     | -0.18845 | 0.877546 | 4.466374 | -5.58891 | 2.26E-07 | 1.08E-06 | 6.541686 |
| KLK14    | -0.19715 | 0.872272 | 5.690769 | -5.58853 | 2.26E-07 | 1.08E-06 | 6.540079 |
| ZNF195   | 0.22772  | 1.170983 | 5.76     | 5.588106 | 2.27E-07 | 1.08E-06 | 6.538325 |
| PTGER3   | -0.30606 | 0.808849 | 6.976044 | -5.58757 | 2.27E-07 | 1.08E-06 | 6.536092 |
| KHDRBS2  | -0.22842 | 0.853569 | 4.918132 | -5.58698 | 2.28E-07 | 1.09E-06 | 6.533618 |
| CLN3     | 0.210232 | 1.156874 | 7.124396 | 5.585068 | 2.30E-07 | 1.09E-06 | 6.525639 |
| PIGT     | 0.165541 | 1.121587 | 8.411209 | 5.584545 | 2.30E-07 | 1.10E-06 | 6.523455 |
| CFAP74   | -0.16519 | 0.891809 | 5.144615 | -5.58134 | 2.33E-07 | 1.11E-06 | 6.510085 |
| PKLR     | -0.37541 | 0.770889 | 6.591099 | -5.58007 | 2.35E-07 | 1.12E-06 | 6.504788 |
| KCNA5    | -0.25149 | 0.84003  | 4.948681 | -5.57803 | 2.37E-07 | 1.13E-06 | 6.496243 |
| NUDT15   | 0.221188 | 1.165693 | 7.912857 | 5.573567 | 2.41E-07 | 1.15E-06 | 6.477641 |
| TNPO1    | 0.223754 | 1.167768 | 8.28956  | 5.573002 | 2.42E-07 | 1.15E-06 | 6.475283 |
| SLC2A5   | -0.5858  | 0.666281 | 8.259451 | -5.57177 | 2.43E-07 | 1.15E-06 | 6.470126 |
| ERAP1    | 0.212585 | 1.158762 | 5.171429 | 5.567275 | 2.48E-07 | 1.18E-06 | 6.451401 |
| P3H3     | -0.17457 | 0.886029 | 4.837802 | -5.56696 | 2.48E-07 | 1.18E-06 | 6.4501   |

|          |          |          |          |          |          |          |          |
|----------|----------|----------|----------|----------|----------|----------|----------|
| IFIT3    | 0.566435 | 1.48086  | 7.29967  | 5.5657   | 2.50E-07 | 1.18E-06 | 6.444838 |
| INPP5F   | 0.267527 | 1.203742 | 6.390989 | 5.565593 | 2.50E-07 | 1.18E-06 | 6.444392 |
| PDZD3    | -0.29629 | 0.814344 | 7.20044  | -5.56555 | 2.50E-07 | 1.18E-06 | 6.444206 |
| APOA1    | -0.24912 | 0.841412 | 5.126593 | -5.56547 | 2.50E-07 | 1.18E-06 | 6.443879 |
| BCL7A    | -0.19818 | 0.871647 | 6.303736 | -5.56493 | 2.51E-07 | 1.18E-06 | 6.441619 |
| CASK     | 0.219406 | 1.164254 | 6.601758 | 5.563487 | 2.52E-07 | 1.19E-06 | 6.435616 |
| CER1     | -0.22299 | 0.856791 | 4.985385 | -5.56342 | 2.52E-07 | 1.19E-06 | 6.435324 |
| CDK4     | 0.170227 | 1.125236 | 8.894396 | 5.561208 | 2.55E-07 | 1.20E-06 | 6.426118 |
| KCNH6    | -0.31988 | 0.801134 | 5.077033 | -5.56082 | 2.55E-07 | 1.20E-06 | 6.424516 |
| TAS2R1   | -0.237   | 0.848505 | 5.177582 | -5.56071 | 2.55E-07 | 1.20E-06 | 6.424038 |
| SNRPF    | 0.236435 | 1.178078 | 8.546484 | 5.560242 | 2.56E-07 | 1.20E-06 | 6.422092 |
| AURKA    | 0.307976 | 1.23797  | 5.141209 | 5.55998  | 2.56E-07 | 1.20E-06 | 6.421    |
| FIBP     | 0.190541 | 1.141192 | 8.598571 | 5.559923 | 2.56E-07 | 1.20E-06 | 6.420763 |
| RAP1GDS1 | 0.216072 | 1.161567 | 7.09011  | 5.559842 | 2.56E-07 | 1.20E-06 | 6.420428 |
| FAM110B  | 0.312937 | 1.242234 | 5.976923 | 5.558614 | 2.57E-07 | 1.21E-06 | 6.415311 |
| ABCE1    | 0.212546 | 1.158731 | 6.73967  | 5.555173 | 2.61E-07 | 1.23E-06 | 6.400979 |
| CPLX3    | -0.17778 | 0.884061 | 4.861868 | -5.55155 | 2.65E-07 | 1.25E-06 | 6.3859   |
| HK1      | 0.354773 | 1.278784 | 7.83022  | 5.54982  | 2.67E-07 | 1.25E-06 | 6.378692 |
| SHOX     | -0.21566 | 0.861151 | 5.468571 | -5.54958 | 2.68E-07 | 1.26E-06 | 6.377699 |
| ECM2     | -0.50255 | 0.705858 | 7.446703 | -5.54726 | 2.70E-07 | 1.27E-06 | 6.368057 |
| CD44     | 0.416444 | 1.334634 | 5.775934 | 5.54634  | 2.71E-07 | 1.27E-06 | 6.36421  |
| SYNCRIP  | 0.204174 | 1.152027 | 7.688791 | 5.545271 | 2.73E-07 | 1.28E-06 | 6.359759 |
| PRPH     | -0.23954 | 0.847015 | 6.362198 | -5.54343 | 2.75E-07 | 1.29E-06 | 6.352089 |
| FABP6    | -0.2175  | 0.860056 | 4.475055 | -5.54299 | 2.75E-07 | 1.29E-06 | 6.350251 |
| HTR5A    | -0.21722 | 0.860223 | 4.397802 | -5.54089 | 2.78E-07 | 1.30E-06 | 6.341548 |
| EFNA3    | -0.18791 | 0.877875 | 5.900989 | -5.5397  | 2.79E-07 | 1.30E-06 | 6.336581 |
| RPH3A    | -0.18384 | 0.880356 | 4.936264 | -5.53933 | 2.80E-07 | 1.31E-06 | 6.335042 |
| CENPM    | 0.375372 | 1.297174 | 5.077363 | 5.53871  | 2.80E-07 | 1.31E-06 | 6.33247  |
| POP5     | 0.230425 | 1.173181 | 8.953077 | 5.537455 | 2.82E-07 | 1.31E-06 | 6.327251 |
| SMIM10L1 | 0.241836 | 1.182496 | 7.652198 | 5.534864 | 2.85E-07 | 1.33E-06 | 6.31648  |
| SHFM1    | 0.191169 | 1.141689 | 7.057143 | 5.531457 | 2.89E-07 | 1.35E-06 | 6.302319 |
| SSTR4    | -0.18676 | 0.878578 | 4.863516 | -5.53032 | 2.91E-07 | 1.35E-06 | 6.297584 |
| TBC1D2B  | 0.384184 | 1.305121 | 7.058242 | 5.528925 | 2.92E-07 | 1.36E-06 | 6.291799 |
| PLA2R1   | -0.34526 | 0.787168 | 4.172747 | -5.52857 | 2.93E-07 | 1.36E-06 | 6.290321 |
| PLG      | -0.77788 | 0.583222 | 10.49055 | -5.52851 | 2.93E-07 | 1.36E-06 | 6.290085 |
| LSM14B   | -0.19052 | 0.876292 | 5.392527 | -5.5282  | 2.93E-07 | 1.36E-06 | 6.288773 |
| ARL6IP1  | 0.209676 | 1.156429 | 9.929121 | 5.52596  | 2.96E-07 | 1.38E-06 | 6.279481 |
| QTRTD1   | 0.226986 | 1.170387 | 5.606593 | 5.524256 | 2.98E-07 | 1.38E-06 | 6.272406 |
| ART1     | -0.19849 | 0.871463 | 5.16989  | -5.52273 | 3.00E-07 | 1.39E-06 | 6.266063 |
| GNB3     | -0.2068  | 0.866459 | 6.261868 | -5.5221  | 3.01E-07 | 1.40E-06 | 6.263439 |
| PLCB4    | 0.492121 | 1.406511 | 4.578791 | 5.520774 | 3.03E-07 | 1.40E-06 | 6.257949 |
| TTC26    | 0.209807 | 1.156533 | 5.635055 | 5.520268 | 3.04E-07 | 1.41E-06 | 6.255848 |
| LAMTOR3  | 0.259488 | 1.197054 | 8.455275 | 5.519489 | 3.05E-07 | 1.41E-06 | 6.252615 |
| BICC1    | 0.300647 | 1.231697 | 7.907802 | 5.519055 | 3.05E-07 | 1.41E-06 | 6.250813 |
| FRMD1    | -0.19508 | 0.873526 | 5.675055 | -5.51795 | 3.07E-07 | 1.42E-06 | 6.24623  |
| DNASE1L1 | -0.2063  | 0.866755 | 7.654286 | -5.51741 | 3.07E-07 | 1.42E-06 | 6.243997 |
| LSR      | 0.322435 | 1.250439 | 6.319011 | 5.516275 | 3.09E-07 | 1.43E-06 | 6.239272 |

|          |          |          |          |          |          |          |          |
|----------|----------|----------|----------|----------|----------|----------|----------|
| ADCY1    | -0.15806 | 0.896231 | 4.929231 | -5.51622 | 3.09E-07 | 1.43E-06 | 6.239028 |
| MYBPH    | -0.21727 | 0.860194 | 5.615604 | -5.50907 | 3.18E-07 | 1.47E-06 | 6.209384 |
| PLA2G2D  | -0.21229 | 0.863166 | 5.981978 | -5.50743 | 3.21E-07 | 1.48E-06 | 6.202567 |
| SKIV2L2  | 0.189696 | 1.140523 | 7.87011  | 5.505588 | 3.23E-07 | 1.49E-06 | 6.194946 |
| PLAC4    | -0.18718 | 0.878319 | 5.474176 | -5.50554 | 3.23E-07 | 1.49E-06 | 6.19473  |
| CAAP1    | 0.224565 | 1.168425 | 7.686484 | 5.505433 | 3.23E-07 | 1.49E-06 | 6.194304 |
| ARHGAP12 | 0.240005 | 1.180997 | 6.758901 | 5.505358 | 3.24E-07 | 1.49E-06 | 6.193992 |
| UTP14C   | 0.223527 | 1.167584 | 8.199231 | 5.505353 | 3.24E-07 | 1.49E-06 | 6.193973 |
| TCEAL4   | 0.205855 | 1.15337  | 9.495275 | 5.505349 | 3.24E-07 | 1.49E-06 | 6.193958 |
| JADE3    | 0.24058  | 1.181467 | 5.255055 | 5.503739 | 3.26E-07 | 1.50E-06 | 6.187281 |
| CD177    | -0.23419 | 0.85016  | 5.805495 | -5.50238 | 3.28E-07 | 1.50E-06 | 6.181644 |
| HEYL     | -0.18774 | 0.877978 | 5.908681 | -5.50179 | 3.29E-07 | 1.51E-06 | 6.179196 |
| SH3BP1   | -0.25299 | 0.839158 | 5.940549 | -5.50122 | 3.29E-07 | 1.51E-06 | 6.176829 |
| ADAM5    | -0.20922 | 0.865003 | 4.601538 | -5.49979 | 3.31E-07 | 1.52E-06 | 6.170903 |
| CNTD2    | -0.25031 | 0.840713 | 6.752088 | -5.4986  | 3.33E-07 | 1.53E-06 | 6.165989 |
| LDB1     | -0.17222 | 0.887475 | 6.744835 | -5.49739 | 3.35E-07 | 1.53E-06 | 6.16096  |
| GJD2     | -0.20291 | 0.868797 | 5.648791 | -5.4955  | 3.38E-07 | 1.54E-06 | 6.153142 |
| DKFZP434 | -0.18406 | 0.880221 | 6.076154 | -5.49314 | 3.41E-07 | 1.56E-06 | 6.143368 |
| BAZ2B    | 0.23687  | 1.178433 | 6.706264 | 5.49166  | 3.43E-07 | 1.57E-06 | 6.137239 |
| MFHAS1   | 0.330778 | 1.257691 | 6.938571 | 5.491481 | 3.43E-07 | 1.57E-06 | 6.136498 |
| ITGAE    | 0.23244  | 1.17482  | 8.614725 | 5.49113  | 3.44E-07 | 1.57E-06 | 6.135047 |
| MS4A4A   | 0.692275 | 1.61583  | 5.174725 | 5.490736 | 3.44E-07 | 1.57E-06 | 6.133415 |
| DMBT1    | -0.20465 | 0.867751 | 6.11967  | -5.48798 | 3.49E-07 | 1.59E-06 | 6.122006 |
| E2F4     | -0.19714 | 0.872281 | 8.211429 | -5.48771 | 3.49E-07 | 1.59E-06 | 6.12089  |
| PADI3    | -0.18858 | 0.877466 | 5.17044  | -5.48551 | 3.52E-07 | 1.60E-06 | 6.111801 |
| PLEKHA1  | 0.400155 | 1.319649 | 8.494835 | 5.485483 | 3.52E-07 | 1.60E-06 | 6.111674 |
| SEMA6C   | -0.22371 | 0.856357 | 6.482198 | -5.48322 | 3.56E-07 | 1.62E-06 | 6.102323 |
| KRT31    | -0.14333 | 0.905428 | 4.199341 | -5.48318 | 3.56E-07 | 1.62E-06 | 6.102163 |
| PLCE1    | -0.3583  | 0.780081 | 5.129121 | -5.48271 | 3.56E-07 | 1.62E-06 | 6.100202 |
| FZD1     | 0.331932 | 1.258698 | 6.241099 | 5.480804 | 3.59E-07 | 1.63E-06 | 6.092315 |
| GSN-AS1  | -0.18043 | 0.88244  | 4.401429 | -5.48035 | 3.60E-07 | 1.63E-06 | 6.090437 |
| GABARAPL | -0.18498 | 0.879661 | 4.594396 | -5.47994 | 3.61E-07 | 1.64E-06 | 6.088745 |
| CKS2     | 0.644314 | 1.562996 | 8.802747 | 5.47825  | 3.63E-07 | 1.65E-06 | 6.081751 |
| LIN7B    | -0.2534  | 0.838916 | 6.061648 | -5.47748 | 3.65E-07 | 1.65E-06 | 6.078561 |
| PKP1     | -0.17486 | 0.885851 | 4.794615 | -5.47496 | 3.68E-07 | 1.67E-06 | 6.068138 |
| SP140L   | 0.332729 | 1.259394 | 5.307363 | 5.474764 | 3.69E-07 | 1.67E-06 | 6.067336 |
| ST3GAL4  | -0.3224  | 0.799738 | 5.812527 | -5.47457 | 3.69E-07 | 1.67E-06 | 6.066529 |
| CCNL1    | -0.3361  | 0.792182 | 7.509451 | -5.47427 | 3.70E-07 | 1.67E-06 | 6.065297 |
| SH3BP5   | -0.33992 | 0.790086 | 8.345604 | -5.47028 | 3.76E-07 | 1.70E-06 | 6.048816 |
| SARDH    | -0.25162 | 0.839951 | 5.402527 | -5.46983 | 3.77E-07 | 1.70E-06 | 6.046961 |
| BPIFA1   | -0.22668 | 0.854599 | 5.257253 | -5.46598 | 3.83E-07 | 1.73E-06 | 6.031035 |
| CTSO     | 0.276623 | 1.211356 | 7.854835 | 5.46335  | 3.87E-07 | 1.75E-06 | 6.020176 |
| ACSF2    | -0.36983 | 0.773873 | 9.624725 | -5.46003 | 3.93E-07 | 1.77E-06 | 6.006458 |
| SAMSN1   | 0.568019 | 1.482487 | 4.291758 | 5.458739 | 3.95E-07 | 1.78E-06 | 6.001139 |
| HACD1    | 0.374386 | 1.296288 | 5.152527 | 5.458245 | 3.96E-07 | 1.78E-06 | 5.999101 |
| SLC16A5  | 0.365155 | 1.28802  | 5.862527 | 5.458077 | 3.96E-07 | 1.78E-06 | 5.998406 |
| AGR2     | 0.649198 | 1.568296 | 5.414945 | 5.456403 | 3.99E-07 | 1.80E-06 | 5.991497 |

|           |          |          |          |          |          |          |          |
|-----------|----------|----------|----------|----------|----------|----------|----------|
| GNG3      | -0.1893  | 0.877031 | 5.537912 | -5.45518 | 4.01E-07 | 1.80E-06 | 5.986453 |
| ZNF747    | -0.20533 | 0.867341 | 7.138681 | -5.45448 | 4.02E-07 | 1.81E-06 | 5.983582 |
| IRF7      | 0.450836 | 1.366832 | 5.900549 | 5.450676 | 4.09E-07 | 1.84E-06 | 5.967866 |
| XYLT2     | 0.201367 | 1.149787 | 6.061099 | 5.45009  | 4.10E-07 | 1.84E-06 | 5.96545  |
| SLC25A36  | -0.25927 | 0.835513 | 8.434835 | -5.44964 | 4.10E-07 | 1.84E-06 | 5.963582 |
| RAB4A     | 0.171783 | 1.126449 | 7.585165 | 5.44935  | 4.11E-07 | 1.84E-06 | 5.962399 |
| LOC10050  | -0.20218 | 0.869234 | 5.651758 | -5.44913 | 4.11E-07 | 1.84E-06 | 5.961496 |
| MIP       | -0.16545 | 0.891651 | 4.252967 | -5.44901 | 4.12E-07 | 1.84E-06 | 5.961007 |
| UBE2Z     | 0.160232 | 1.117467 | 8.38967  | 5.448521 | 4.12E-07 | 1.85E-06 | 5.95898  |
| SNCG      | -0.23739 | 0.848281 | 6.60022  | -5.44696 | 4.15E-07 | 1.86E-06 | 5.952545 |
| CCDC92    | 0.190527 | 1.14118  | 8.097912 | 5.440882 | 4.26E-07 | 1.91E-06 | 5.927487 |
| GALNT8    | -0.21423 | 0.862005 | 4.443626 | -5.44053 | 4.27E-07 | 1.91E-06 | 5.926056 |
| GIMAP6    | 0.435213 | 1.35211  | 5.24978  | 5.439556 | 4.29E-07 | 1.92E-06 | 5.922024 |
| FSTL4     | -0.17803 | 0.88391  | 4.590659 | -5.43922 | 4.29E-07 | 1.92E-06 | 5.920624 |
| SCNN1B    | -0.49986 | 0.707175 | 6.379121 | -5.43791 | 4.32E-07 | 1.93E-06 | 5.915261 |
| PPP1R2P9  | -0.18004 | 0.882676 | 4.419011 | -5.43715 | 4.33E-07 | 1.93E-06 | 5.912095 |
| ALDH1A3   | 0.418826 | 1.336839 | 5.974286 | 5.433813 | 4.39E-07 | 1.96E-06 | 5.898367 |
| PRDM11    | -0.21137 | 0.863715 | 5.093736 | -5.43318 | 4.40E-07 | 1.96E-06 | 5.89576  |
| GAST      | -0.20692 | 0.866386 | 5.076374 | -5.43131 | 4.44E-07 | 1.98E-06 | 5.888062 |
| LINC00094 | 0.230957 | 1.173613 | 6.637253 | 5.430288 | 4.46E-07 | 1.98E-06 | 5.883854 |
| SYT11     | 0.201768 | 1.150107 | 4.329341 | 5.430253 | 4.46E-07 | 1.98E-06 | 5.88371  |
| CHRND     | -0.18418 | 0.880147 | 4.350659 | -5.42962 | 4.47E-07 | 1.99E-06 | 5.881118 |
| GDPD5     | -0.16423 | 0.892404 | 5.778352 | -5.42633 | 4.53E-07 | 2.02E-06 | 5.867547 |
| YIF1A     | 0.245367 | 1.185394 | 7.852857 | 5.426298 | 4.53E-07 | 2.02E-06 | 5.867428 |
| NECAB2    | -0.53428 | 0.690503 | 7.553187 | -5.42604 | 4.54E-07 | 2.02E-06 | 5.866384 |
| BMP7      | -0.17599 | 0.885163 | 5.193626 | -5.42527 | 4.55E-07 | 2.02E-06 | 5.863195 |
| USP14     | 0.18385  | 1.135911 | 8.024176 | 5.425091 | 4.56E-07 | 2.02E-06 | 5.86246  |
| SUB1      | 0.160266 | 1.117493 | 9.561209 | 5.424822 | 4.56E-07 | 2.02E-06 | 5.861354 |
| SELENBP1  | -0.466   | 0.723969 | 9.01956  | -5.42433 | 4.57E-07 | 2.03E-06 | 5.859311 |
| MOXD1     | 0.584913 | 1.499949 | 6.12033  | 5.422844 | 4.60E-07 | 2.04E-06 | 5.853218 |
| NGB       | -0.19833 | 0.87156  | 4.687143 | -5.42267 | 4.60E-07 | 2.04E-06 | 5.852509 |
| GDPD2     | -0.25428 | 0.838408 | 6.321868 | -5.4225  | 4.61E-07 | 2.04E-06 | 5.851822 |
| GTF2IRD1  | 0.225063 | 1.168828 | 8.039121 | 5.421792 | 4.62E-07 | 2.04E-06 | 5.848888 |
| PDHX      | 0.253411 | 1.192022 | 7.818791 | 5.421443 | 4.63E-07 | 2.05E-06 | 5.847452 |
| RHCG      | -0.8111  | 0.569947 | 8.249341 | -5.42032 | 4.65E-07 | 2.06E-06 | 5.842833 |
| GCK       | -0.19925 | 0.871005 | 5.175385 | -5.41888 | 4.68E-07 | 2.07E-06 | 5.836927 |
| ADM       | -0.7923  | 0.577421 | 9.254505 | -5.41263 | 4.80E-07 | 2.12E-06 | 5.811199 |
| CHN2      | -0.30194 | 0.811162 | 6.273516 | -5.41121 | 4.83E-07 | 2.13E-06 | 5.805389 |
| SET       | 0.222435 | 1.166701 | 10.38956 | 5.409377 | 4.87E-07 | 2.15E-06 | 5.797847 |
| IQSEC3    | -0.21071 | 0.864115 | 5.474066 | -5.40857 | 4.89E-07 | 2.15E-06 | 5.79455  |
| CLTB      | -0.23409 | 0.850223 | 7.81033  | -5.40813 | 4.90E-07 | 2.16E-06 | 5.792746 |
| DRD5      | -0.27364 | 0.827228 | 5.090769 | -5.40783 | 4.90E-07 | 2.16E-06 | 5.791473 |
| RHBG      | -0.35684 | 0.780875 | 6.775934 | -5.40781 | 4.90E-07 | 2.16E-06 | 5.791413 |
| C17orf53  | -0.20289 | 0.868806 | 5.329451 | -5.40781 | 4.90E-07 | 2.16E-06 | 5.791395 |
| NMD3      | 0.32971  | 1.256761 | 7.84     | 5.407796 | 4.90E-07 | 2.16E-06 | 5.791352 |
| YIPF5     | 0.217256 | 1.16252  | 7.403956 | 5.405178 | 4.96E-07 | 2.18E-06 | 5.780599 |
| CLDN11    | -0.27823 | 0.824604 | 5.272198 | -5.40407 | 4.98E-07 | 2.19E-06 | 5.776033 |

|           |          |          |          |          |          |          |          |
|-----------|----------|----------|----------|----------|----------|----------|----------|
| EPN1      | -0.23229 | 0.851286 | 6.352308 | -5.40403 | 4.98E-07 | 2.19E-06 | 5.775902 |
| EXOSC8    | 0.231705 | 1.174222 | 6.271319 | 5.403018 | 5.01E-07 | 2.20E-06 | 5.77173  |
| RPGRIP1   | -0.16562 | 0.891546 | 5.095275 | -5.40109 | 5.05E-07 | 2.21E-06 | 5.7638   |
| PRELP     | -0.19861 | 0.871391 | 6.484396 | -5.40046 | 5.06E-07 | 2.22E-06 | 5.76121  |
| PRRX2     | -0.22918 | 0.853118 | 6.363407 | -5.39947 | 5.08E-07 | 2.22E-06 | 5.75715  |
| SYNPO     | -0.32385 | 0.798935 | 6.396593 | -5.39945 | 5.08E-07 | 2.22E-06 | 5.757086 |
| SOX15     | -0.18099 | 0.882097 | 5.135934 | -5.39696 | 5.14E-07 | 2.25E-06 | 5.746869 |
| BTBD1     | 0.267957 | 1.204101 | 8.940549 | 5.396919 | 5.14E-07 | 2.25E-06 | 5.746694 |
| COX6A2    | -0.35325 | 0.782818 | 5.939011 | -5.39501 | 5.18E-07 | 2.26E-06 | 5.738844 |
| IFIT2     | 0.460478 | 1.375998 | 6.389231 | 5.394505 | 5.19E-07 | 2.27E-06 | 5.736789 |
| AIMP2     | 0.202884 | 1.150997 | 9.40011  | 5.391923 | 5.25E-07 | 2.29E-06 | 5.726197 |
| MAFF      | -1.296   | 0.407254 | 6.799121 | -5.39065 | 5.27E-07 | 2.30E-06 | 5.720955 |
| TUBA1B    | 0.443121 | 1.359542 | 11.12956 | 5.388937 | 5.31E-07 | 2.32E-06 | 5.71395  |
| C7orf43   | -0.17225 | 0.88746  | 6.183736 | -5.38832 | 5.33E-07 | 2.32E-06 | 5.711404 |
| NCR3      | -0.1206  | 0.919803 | 4.693187 | -5.38827 | 5.33E-07 | 2.32E-06 | 5.711201 |
| DNAH6     | -0.15663 | 0.897119 | 4.774286 | -5.38759 | 5.34E-07 | 2.33E-06 | 5.708435 |
| MRPL3     | 0.235522 | 1.177332 | 9.794945 | 5.386978 | 5.36E-07 | 2.33E-06 | 5.705918 |
| SOX4      | 0.622242 | 1.539265 | 7.428571 | 5.385791 | 5.38E-07 | 2.34E-06 | 5.701051 |
| HTR1E     | -0.18894 | 0.877249 | 4.454176 | -5.38467 | 5.41E-07 | 2.35E-06 | 5.696474 |
| CMAS      | 0.229995 | 1.172831 | 6.083516 | 5.38293  | 5.45E-07 | 2.37E-06 | 5.689324 |
| MARS      | 0.173348 | 1.127672 | 7.326374 | 5.380805 | 5.50E-07 | 2.39E-06 | 5.680614 |
| IK        | 0.176899 | 1.130451 | 9.037912 | 5.379305 | 5.53E-07 | 2.40E-06 | 5.674469 |
| NUBP1     | 0.183763 | 1.135843 | 7.60022  | 5.37926  | 5.54E-07 | 2.40E-06 | 5.674287 |
| RALYL     | -0.58285 | 0.667643 | 7.473516 | -5.37779 | 5.57E-07 | 2.42E-06 | 5.668247 |
| NTSR2     | -0.21772 | 0.859921 | 4.464725 | -5.37489 | 5.64E-07 | 2.44E-06 | 5.656369 |
| P2RX4     | 0.251353 | 1.190323 | 8.205165 | 5.372118 | 5.71E-07 | 2.47E-06 | 5.645036 |
| MGC2889   | -0.18703 | 0.87841  | 4.490989 | -5.37192 | 5.71E-07 | 2.47E-06 | 5.644216 |
| CLCA1     | -0.19693 | 0.872407 | 4.860879 | -5.37124 | 5.73E-07 | 2.48E-06 | 5.641461 |
| CSNK1D    | 0.210126 | 1.156789 | 7.39956  | 5.370257 | 5.75E-07 | 2.49E-06 | 5.637416 |
| NAT6      | -0.21258 | 0.86299  | 5.788571 | -5.3684  | 5.80E-07 | 2.51E-06 | 5.629797 |
| NUP153    | 0.263575 | 1.20045  | 7.431209 | 5.36657  | 5.84E-07 | 2.52E-06 | 5.622326 |
| SOCS7     | -0.16959 | 0.889096 | 5.094615 | -5.36626 | 5.85E-07 | 2.53E-06 | 5.62107  |
| TMED5     | 0.225647 | 1.169302 | 8.885714 | 5.365013 | 5.88E-07 | 2.54E-06 | 5.615959 |
| TNFRSF13I | -0.2209  | 0.858028 | 5.65011  | -5.36319 | 5.93E-07 | 2.56E-06 | 5.608508 |
| CLASRP    | -0.21401 | 0.862138 | 8.083736 | -5.36245 | 5.94E-07 | 2.56E-06 | 5.605453 |
| EVX1      | -0.27662 | 0.825524 | 5.045385 | -5.36157 | 5.97E-07 | 2.57E-06 | 5.601863 |
| CSK       | 0.192106 | 1.14243  | 7.01978  | 5.36066  | 5.99E-07 | 2.58E-06 | 5.598154 |
| DLEC1     | -0.15946 | 0.895358 | 5.425275 | -5.36023 | 6.00E-07 | 2.58E-06 | 5.596406 |
| UCP2      | 0.449614 | 1.365674 | 6.854945 | 5.360232 | 6.00E-07 | 2.58E-06 | 5.596402 |
| GOLPH3L   | 0.233609 | 1.175772 | 8.727912 | 5.360156 | 6.00E-07 | 2.58E-06 | 5.596092 |
| CLTCL1    | -0.21043 | 0.864277 | 5.906374 | -5.35972 | 6.01E-07 | 2.59E-06 | 5.594309 |
| SLC34A2   | 0.512638 | 1.426656 | 5.442198 | 5.358459 | 6.04E-07 | 2.60E-06 | 5.589154 |
| NEUROG1   | -0.16844 | 0.889802 | 5.036703 | -5.3575  | 6.07E-07 | 2.61E-06 | 5.585228 |
| SPG11     | 0.196942 | 1.146266 | 7.20978  | 5.355744 | 6.11E-07 | 2.63E-06 | 5.578054 |
| LOC10050  | -0.20486 | 0.867626 | 4.38022  | -5.35509 | 6.13E-07 | 2.63E-06 | 5.575375 |
| DTL       | 0.300725 | 1.231763 | 3.871319 | 5.352862 | 6.19E-07 | 2.65E-06 | 5.566275 |
| CATSPERG  | -0.16258 | 0.893426 | 4.253516 | -5.35233 | 6.20E-07 | 2.66E-06 | 5.564102 |

|          |          |          |          |          |          |          |          |
|----------|----------|----------|----------|----------|----------|----------|----------|
| RSPH6A   | -0.21315 | 0.862652 | 4.862857 | -5.35226 | 6.21E-07 | 2.66E-06 | 5.56382  |
| CELA3B   | -0.17638 | 0.884923 | 6.535824 | -5.35212 | 6.21E-07 | 2.66E-06 | 5.563253 |
| ALOX12P2 | -0.20874 | 0.86529  | 5.293297 | -5.35097 | 6.24E-07 | 2.67E-06 | 5.558553 |
| EFNA4    | 0.263821 | 1.200655 | 5.502418 | 5.349373 | 6.28E-07 | 2.69E-06 | 5.55202  |
| GTF2A2   | 0.218121 | 1.163217 | 8.113297 | 5.348783 | 6.30E-07 | 2.69E-06 | 5.54961  |
| HIST1H1C | 0.530367 | 1.444297 | 8.148791 | 5.348545 | 6.30E-07 | 2.69E-06 | 5.548636 |
| RPA2     | 0.289024 | 1.221814 | 7.789011 | 5.345632 | 6.38E-07 | 2.73E-06 | 5.536742 |
| ZNF267   | 0.313082 | 1.242359 | 5.133516 | 5.343564 | 6.44E-07 | 2.75E-06 | 5.528299 |
| ALX3     | -0.20513 | 0.867463 | 4.517912 | -5.34274 | 6.46E-07 | 2.76E-06 | 5.524946 |
| PIK3C2G  | -0.25021 | 0.840775 | 5.196923 | -5.34228 | 6.47E-07 | 2.76E-06 | 5.523054 |
| CUL9     | -0.14904 | 0.901851 | 5.87956  | -5.34183 | 6.48E-07 | 2.76E-06 | 5.521227 |
| LHB      | -0.24231 | 0.845391 | 5.616264 | -5.33961 | 6.55E-07 | 2.79E-06 | 5.512152 |
| FAM49B   | 0.17799  | 1.131307 | 7.057582 | 5.338538 | 6.58E-07 | 2.80E-06 | 5.507781 |
| LTB      | 0.56143  | 1.475731 | 6.091978 | 5.338237 | 6.58E-07 | 2.80E-06 | 5.506557 |
| TUB      | -0.17448 | 0.886085 | 6.181978 | -5.33756 | 6.60E-07 | 2.81E-06 | 5.503812 |
| TRIM21   | 0.209507 | 1.156293 | 6.561429 | 5.336364 | 6.64E-07 | 2.82E-06 | 5.498915 |
| TOB1     | -0.35737 | 0.780585 | 9.891538 | -5.33591 | 6.65E-07 | 2.83E-06 | 5.497051 |
| LRRC42   | 0.174111 | 1.128269 | 6.431099 | 5.335859 | 6.65E-07 | 2.83E-06 | 5.496853 |
| CHRM2    | -0.23662 | 0.84873  | 4.884945 | -5.33403 | 6.70E-07 | 2.85E-06 | 5.489375 |
| AP2S1    | 0.216005 | 1.161513 | 9.117033 | 5.332891 | 6.73E-07 | 2.86E-06 | 5.484746 |
| EIF3D    | 0.19701  | 1.14632  | 9.432857 | 5.332286 | 6.75E-07 | 2.86E-06 | 5.482281 |
| LHX3     | -0.18934 | 0.877005 | 5.325934 | -5.33179 | 6.77E-07 | 2.87E-06 | 5.480243 |
| IL36A    | -0.20644 | 0.866673 | 4.998132 | -5.33128 | 6.78E-07 | 2.87E-06 | 5.478165 |
| YWHAE    | -0.23961 | 0.846975 | 9.399121 | -5.33091 | 6.79E-07 | 2.88E-06 | 5.476659 |
| ZNF268   | 0.278343 | 1.212801 | 6.143077 | 5.3307   | 6.80E-07 | 2.88E-06 | 5.475811 |
| ZNF83    | 0.233222 | 1.175457 | 5.63033  | 5.328904 | 6.85E-07 | 2.90E-06 | 5.468489 |
| ZCCHC10  | 0.243541 | 1.183895 | 5.69978  | 5.328644 | 6.86E-07 | 2.90E-06 | 5.467431 |
| SLC9A5   | -0.17352 | 0.886679 | 5.345934 | -5.32781 | 6.88E-07 | 2.91E-06 | 5.464014 |
| LY6G6D   | -0.17775 | 0.884078 | 4.553187 | -5.32757 | 6.89E-07 | 2.91E-06 | 5.463045 |
| CSDC2    | -0.29272 | 0.816359 | 7.052637 | -5.32675 | 6.91E-07 | 2.92E-06 | 5.459726 |
| CA9      | -0.21687 | 0.86043  | 5.523626 | -5.32667 | 6.91E-07 | 2.92E-06 | 5.459372 |
| GPRC5D   | -0.21669 | 0.86054  | 5.301978 | -5.32584 | 6.94E-07 | 2.93E-06 | 5.45598  |
| DPEP1    | -0.65112 | 0.636788 | 10.4278  | -5.32486 | 6.97E-07 | 2.94E-06 | 5.452025 |
| TTLL1    | 0.20685  | 1.154166 | 5.950549 | 5.321798 | 7.06E-07 | 2.97E-06 | 5.439532 |
| MEST     | 0.596401 | 1.51194  | 8.112967 | 5.321382 | 7.07E-07 | 2.98E-06 | 5.437835 |
| HOXB7    | 0.322831 | 1.250782 | 7.777033 | 5.316328 | 7.22E-07 | 3.04E-06 | 5.417253 |
| IQSEC1   | -0.17072 | 0.888396 | 6.742967 | -5.31544 | 7.25E-07 | 3.05E-06 | 5.413644 |
| MASP2    | -0.14159 | 0.90652  | 5.008462 | -5.31399 | 7.29E-07 | 3.07E-06 | 5.40772  |
| CALU     | 0.182357 | 1.134737 | 7.076264 | 5.312565 | 7.34E-07 | 3.08E-06 | 5.401932 |
| KIF3A    | 0.169778 | 1.124885 | 5.063956 | 5.311519 | 7.37E-07 | 3.10E-06 | 5.397676 |
| CEACAM3  | -0.18663 | 0.878657 | 5.339451 | -5.31016 | 7.41E-07 | 3.11E-06 | 5.39214  |
| PTK2     | 0.165454 | 1.121519 | 7.867253 | 5.310109 | 7.41E-07 | 3.11E-06 | 5.391938 |
| EVI2A    | 0.650106 | 1.569284 | 5.156264 | 5.309971 | 7.42E-07 | 3.11E-06 | 5.391379 |
| HNF1B    | 0.281763 | 1.21568  | 9.488681 | 5.308936 | 7.45E-07 | 3.12E-06 | 5.387166 |
| KLK3     | -0.14417 | 0.904897 | 5.020879 | -5.30835 | 7.47E-07 | 3.13E-06 | 5.38479  |
| TBL1XR1  | 0.290889 | 1.223394 | 6.613846 | 5.308066 | 7.48E-07 | 3.13E-06 | 5.383627 |
| KIR3DL2  | -0.19871 | 0.871329 | 5.00978  | -5.30775 | 7.49E-07 | 3.13E-06 | 5.382342 |

|           |          |          |          |          |          |          |          |
|-----------|----------|----------|----------|----------|----------|----------|----------|
| SLC6A16   | -0.23145 | 0.851776 | 4.98011  | -5.3073  | 7.50E-07 | 3.14E-06 | 5.380509 |
| CDH18     | -0.19686 | 0.872447 | 4.923956 | -5.30658 | 7.52E-07 | 3.15E-06 | 5.377571 |
| EMID1     | -0.18545 | 0.879375 | 6.553077 | -5.30605 | 7.54E-07 | 3.15E-06 | 5.375417 |
| MLLT11    | 0.30601  | 1.236284 | 5.781758 | 5.303792 | 7.61E-07 | 3.18E-06 | 5.366243 |
| STAT5A    | -0.27904 | 0.82414  | 7.115275 | -5.30283 | 7.64E-07 | 3.19E-06 | 5.36235  |
| APBB1     | -0.20173 | 0.869508 | 5.752418 | -5.30237 | 7.66E-07 | 3.20E-06 | 5.360467 |
| SPRY2     | -0.30372 | 0.810161 | 6.612418 | -5.302   | 7.67E-07 | 3.20E-06 | 5.358955 |
| MIA2      | -0.20621 | 0.86681  | 4.398462 | -5.3015  | 7.69E-07 | 3.21E-06 | 5.356921 |
| R3HDM2    | -0.30337 | 0.810359 | 8.298462 | -5.29859 | 7.78E-07 | 3.24E-06 | 5.345102 |
| STMN4     | -0.16664 | 0.890917 | 4.678901 | -5.29694 | 7.83E-07 | 3.26E-06 | 5.338374 |
| LOC10050  | -0.17769 | 0.884117 | 4.976044 | -5.29291 | 7.97E-07 | 3.32E-06 | 5.322025 |
| CNTFR     | -0.23099 | 0.852053 | 5.851429 | -5.29278 | 7.97E-07 | 3.32E-06 | 5.321503 |
| MAN2A2    | -0.16812 | 0.890001 | 6.301429 | -5.29219 | 7.99E-07 | 3.33E-06 | 5.319104 |
| PPP1CA    | 0.178628 | 1.131807 | 9.526593 | 5.29115  | 8.03E-07 | 3.34E-06 | 5.314864 |
| ARF1      | 0.164841 | 1.121042 | 9.819341 | 5.290988 | 8.03E-07 | 3.34E-06 | 5.314207 |
| SNN       | 0.190396 | 1.141077 | 5.361978 | 5.290123 | 8.06E-07 | 3.35E-06 | 5.310696 |
| PMEL      | -0.1793  | 0.883132 | 5.702857 | -5.28903 | 8.10E-07 | 3.36E-06 | 5.306255 |
| ARR3      | -0.24596 | 0.843257 | 6.17033  | -5.28877 | 8.11E-07 | 3.37E-06 | 5.305188 |
| TP73      | -0.20005 | 0.870521 | 4.468901 | -5.28845 | 8.12E-07 | 3.37E-06 | 5.303903 |
| PDCD5     | 0.333797 | 1.260326 | 6.155934 | 5.286313 | 8.19E-07 | 3.40E-06 | 5.295224 |
| MUTYH     | -0.20486 | 0.867623 | 7.15     | -5.28616 | 8.20E-07 | 3.40E-06 | 5.294606 |
| SFT2D2    | 0.32528  | 1.252908 | 6.658462 | 5.286119 | 8.20E-07 | 3.40E-06 | 5.294436 |
| RRN3      | 0.247319 | 1.186999 | 5.931648 | 5.285712 | 8.21E-07 | 3.40E-06 | 5.292784 |
| NOC3L     | 0.267304 | 1.203557 | 6.620879 | 5.284577 | 8.25E-07 | 3.41E-06 | 5.288178 |
| NKAIN1    | -0.19726 | 0.872205 | 5.175714 | -5.28232 | 8.33E-07 | 3.44E-06 | 5.279    |
| SPRR3     | -0.20921 | 0.865012 | 5.032198 | -5.28229 | 8.33E-07 | 3.44E-06 | 5.278897 |
| MLLT4-AS1 | -0.27361 | 0.827245 | 5.092088 | -5.28172 | 8.35E-07 | 3.45E-06 | 5.276581 |
| BAG2      | 0.382377 | 1.303488 | 6.046044 | 5.281605 | 8.36E-07 | 3.45E-06 | 5.276118 |
| CD52      | 0.776986 | 1.713547 | 5.568571 | 5.280529 | 8.39E-07 | 3.46E-06 | 5.271752 |
| TMEM243   | 0.280454 | 1.214577 | 8.259121 | 5.280453 | 8.40E-07 | 3.46E-06 | 5.271443 |
| RUNDC3B   | -0.34783 | 0.785765 | 5.795604 | -5.27741 | 8.50E-07 | 3.51E-06 | 5.25911  |
| SPTB      | -0.17817 | 0.883824 | 5.684286 | -5.27678 | 8.53E-07 | 3.51E-06 | 5.256548 |
| ARMT1     | 0.35986  | 1.283301 | 8.481648 | 5.275759 | 8.56E-07 | 3.53E-06 | 5.252406 |
| DLG5      | 0.240193 | 1.181151 | 6.627473 | 5.275715 | 8.57E-07 | 3.53E-06 | 5.252228 |
| RDH8      | -0.1654  | 0.891681 | 5.025165 | -5.2751  | 8.59E-07 | 3.53E-06 | 5.249747 |
| TMBIM1    | 0.251768 | 1.190665 | 8.704066 | 5.273779 | 8.64E-07 | 3.55E-06 | 5.244377 |
| ARVCF     | -0.19385 | 0.874272 | 7.341099 | -5.2728  | 8.67E-07 | 3.57E-06 | 5.240413 |
| MYOC      | -0.18925 | 0.877064 | 4.97033  | -5.27243 | 8.68E-07 | 3.57E-06 | 5.238918 |
| CIDEC     | -0.24181 | 0.845686 | 5.309121 | -5.26856 | 8.83E-07 | 3.63E-06 | 5.223226 |
| ARMCX5    | 0.227565 | 1.170857 | 6.462967 | 5.26789  | 8.85E-07 | 3.63E-06 | 5.220509 |
| CCIN      | -0.18694 | 0.878469 | 5.105385 | -5.26694 | 8.89E-07 | 3.65E-06 | 5.216661 |
| ST14      | 0.286792 | 1.219925 | 6.527473 | 5.266767 | 8.89E-07 | 3.65E-06 | 5.215958 |
| TNNC1     | -0.40957 | 0.75285  | 4.997033 | -5.26645 | 8.91E-07 | 3.65E-06 | 5.214665 |
| PPP1R10   | -0.23644 | 0.848838 | 7.103297 | -5.26409 | 8.99E-07 | 3.69E-06 | 5.205119 |
| JRKL      | 0.215836 | 1.161377 | 6.609341 | 5.263776 | 9.01E-07 | 3.69E-06 | 5.203842 |
| HCP5      | 0.446889 | 1.363098 | 5.900989 | 5.26363  | 9.01E-07 | 3.69E-06 | 5.20325  |
| SLC25A44  | -0.21934 | 0.858959 | 8.011319 | -5.26261 | 9.05E-07 | 3.70E-06 | 5.199132 |

|          |          |          |          |          |          |          |          |
|----------|----------|----------|----------|----------|----------|----------|----------|
| PPP1R12A | 0.193826 | 1.143793 | 6.298022 | 5.262434 | 9.06E-07 | 3.70E-06 | 5.198406 |
| ARHGEF15 | -0.19256 | 0.875051 | 5.23956  | -5.2605  | 9.13E-07 | 3.73E-06 | 5.190564 |
| OR1G1    | -0.17571 | 0.885332 | 5.026154 | -5.25985 | 9.15E-07 | 3.74E-06 | 5.18795  |
| GRAMD4   | 0.198696 | 1.14766  | 5.59956  | 5.257756 | 9.24E-07 | 3.77E-06 | 5.179466 |
| KRAS     | 0.279406 | 1.213695 | 7.621429 | 5.256876 | 9.27E-07 | 3.78E-06 | 5.175906 |
| PCSK1N   | -0.44765 | 0.733238 | 8.354505 | -5.25662 | 9.28E-07 | 3.79E-06 | 5.17487  |
| WARS     | 0.234899 | 1.176824 | 8.416593 | 5.253825 | 9.39E-07 | 3.83E-06 | 5.163558 |
| ENTPD7   | 0.256449 | 1.194535 | 5.547033 | 5.252805 | 9.43E-07 | 3.84E-06 | 5.159432 |
| GABARAPL | -0.27844 | 0.824482 | 8.292527 | -5.25176 | 9.47E-07 | 3.86E-06 | 5.155187 |
| UBXN4    | 0.186135 | 1.137712 | 8.308132 | 5.251505 | 9.48E-07 | 3.86E-06 | 5.154172 |
| C10orf2  | 0.22943  | 1.172372 | 5.987802 | 5.2512   | 9.49E-07 | 3.86E-06 | 5.15294  |
| SLC48A1  | 0.264449 | 1.201177 | 6.560989 | 5.249369 | 9.57E-07 | 3.89E-06 | 5.145532 |
| RBP1     | 0.381618 | 1.302802 | 5.961538 | 5.248173 | 9.61E-07 | 3.91E-06 | 5.140699 |
| CIT      | 0.300957 | 1.231961 | 7.581868 | 5.247983 | 9.62E-07 | 3.91E-06 | 5.139931 |
| SGCA     | -0.17817 | 0.883821 | 4.204066 | -5.24755 | 9.64E-07 | 3.92E-06 | 5.138168 |
| PTPRC    | 0.455981 | 1.371715 | 4.814615 | 5.245227 | 9.73E-07 | 3.95E-06 | 5.128786 |
| NCF2     | 0.533101 | 1.447037 | 4.893187 | 5.24513  | 9.74E-07 | 3.95E-06 | 5.128394 |
| PPM1D    | 0.235357 | 1.177198 | 5.777473 | 5.245079 | 9.74E-07 | 3.95E-06 | 5.128189 |
| HEXA     | 0.196121 | 1.145614 | 9.352418 | 5.244478 | 9.76E-07 | 3.96E-06 | 5.12576  |
| HHLA1    | -0.21003 | 0.86452  | 6.294835 | -5.24429 | 9.77E-07 | 3.96E-06 | 5.12501  |
| FAM127A  | 0.171425 | 1.12617  | 9.608901 | 5.242969 | 9.83E-07 | 3.98E-06 | 5.119658 |
| KCNE5    | -0.1669  | 0.890753 | 4.186813 | -5.24293 | 9.83E-07 | 3.98E-06 | 5.11949  |
| PCDHGB5  | -0.19877 | 0.871294 | 5.747143 | -5.24288 | 9.83E-07 | 3.98E-06 | 5.119304 |
| MYOG     | -0.20675 | 0.866488 | 5.364066 | -5.24034 | 9.93E-07 | 4.02E-06 | 5.109035 |
| RAI14    | 0.265527 | 1.202075 | 8.16     | 5.239768 | 9.96E-07 | 4.03E-06 | 5.106723 |
| CACNB4   | -0.21479 | 0.86167  | 4.928132 | -5.23918 | 9.98E-07 | 4.03E-06 | 5.104341 |
| KEL      | -0.20494 | 0.867576 | 6.656484 | -5.23872 | 1.00E-06 | 4.04E-06 | 5.102497 |
| JUNB     | -0.66672 | 0.629935 | 6.547692 | -5.23866 | 1.00E-06 | 4.04E-06 | 5.102266 |
| SNF8     | 0.174652 | 1.128692 | 8.315714 | 5.237594 | 1.00E-06 | 4.05E-06 | 5.097943 |
| YAP1     | 0.236807 | 1.178382 | 7.033407 | 5.2373   | 1.01E-06 | 4.06E-06 | 5.096754 |
| DOC2B    | -0.1988  | 0.871277 | 5.565824 | -5.23704 | 1.01E-06 | 4.06E-06 | 5.095688 |
| BAG1     | -0.17098 | 0.888242 | 8.491538 | -5.2364  | 1.01E-06 | 4.07E-06 | 5.093138 |
| CUTC     | -0.21493 | 0.861589 | 6.671978 | -5.23635 | 1.01E-06 | 4.07E-06 | 5.092924 |
| CASQ1    | -0.18855 | 0.87749  | 4.112198 | -5.23617 | 1.01E-06 | 4.07E-06 | 5.092205 |
| CLIP3    | -0.20087 | 0.870026 | 6.391538 | -5.23592 | 1.01E-06 | 4.07E-06 | 5.091198 |
| RIT1     | 0.406019 | 1.325025 | 6.751648 | 5.235755 | 1.01E-06 | 4.07E-06 | 5.090514 |
| VEZF1    | 0.188546 | 1.139615 | 7.737802 | 5.23484  | 1.02E-06 | 4.09E-06 | 5.086821 |
| KIF20A   | 0.396    | 1.315855 | 4.365824 | 5.234157 | 1.02E-06 | 4.10E-06 | 5.08406  |
| DIO1     | -0.51363 | 0.700456 | 10.50253 | -5.22913 | 1.04E-06 | 4.18E-06 | 5.063766 |
| OSBP2    | -0.19403 | 0.874158 | 5.632527 | -5.228   | 1.05E-06 | 4.20E-06 | 5.059221 |
| PAPPA    | 0.487372 | 1.401889 | 5.962747 | 5.227919 | 1.05E-06 | 4.20E-06 | 5.058881 |
| LMX1B    | -0.19356 | 0.874445 | 5.184066 | -5.22775 | 1.05E-06 | 4.20E-06 | 5.058206 |
| GAS6     | -0.24563 | 0.843449 | 7.625275 | -5.22633 | 1.05E-06 | 4.22E-06 | 5.05245  |
| EIF5     | -0.188   | 0.877825 | 8.757253 | -5.22585 | 1.06E-06 | 4.23E-06 | 5.050552 |
| RSRC1    | 0.191575 | 1.14201  | 5.365604 | 5.225786 | 1.06E-06 | 4.23E-06 | 5.050275 |
| LUM      | 0.820237 | 1.765696 | 8.296264 | 5.224287 | 1.06E-06 | 4.25E-06 | 5.044226 |
| SYNE2    | 0.395314 | 1.315229 | 7.214615 | 5.223584 | 1.07E-06 | 4.26E-06 | 5.04139  |



|          |          |          |          |          |          |          |          |
|----------|----------|----------|----------|----------|----------|----------|----------|
| OAT      | -0.39989 | 0.757917 | 10.67725 | -5.22341 | 1.07E-06 | 4.26E-06 | 5.040687 |
| DCXR     | -0.54305 | 0.686317 | 11.53407 | -5.22224 | 1.07E-06 | 4.28E-06 | 5.035973 |
| CNR2     | -0.21241 | 0.863094 | 5.416484 | -5.22212 | 1.07E-06 | 4.28E-06 | 5.035492 |
| RAD54L2  | -0.16878 | 0.889596 | 5.951538 | -5.22183 | 1.07E-06 | 4.29E-06 | 5.034307 |
| ORC2     | 0.20556  | 1.153134 | 5.291868 | 5.221045 | 1.08E-06 | 4.30E-06 | 5.031151 |
| PAM      | 0.182952 | 1.135204 | 10.1833  | 5.220087 | 1.08E-06 | 4.31E-06 | 5.02729  |
| PDHA1    | 0.158425 | 1.116068 | 9.087473 | 5.219587 | 1.08E-06 | 4.32E-06 | 5.025274 |
| GLUD1    | -0.30042 | 0.812016 | 10.23253 | -5.21628 | 1.10E-06 | 4.38E-06 | 5.011929 |
| DDX60    | 0.49799  | 1.412245 | 6.565824 | 5.215963 | 1.10E-06 | 4.38E-06 | 5.010664 |
| PRRC2A   | -0.21906 | 0.859123 | 6.463846 | -5.21505 | 1.10E-06 | 4.40E-06 | 5.006971 |
| ADGRB1   | -0.16255 | 0.893447 | 4.705055 | -5.21378 | 1.11E-06 | 4.42E-06 | 5.00188  |
| TXNRD1   | 0.323826 | 1.251646 | 8.752308 | 5.212996 | 1.11E-06 | 4.43E-06 | 4.99871  |
| CRLF2    | -0.22062 | 0.858195 | 4.972857 | -5.21241 | 1.12E-06 | 4.44E-06 | 4.996363 |
| DENND1C  | -0.23445 | 0.850007 | 5.933626 | -5.21175 | 1.12E-06 | 4.45E-06 | 4.993687 |
| REEP2    | -0.20627 | 0.866778 | 6.916044 | -5.21128 | 1.12E-06 | 4.46E-06 | 4.991811 |
| LEPR     | 0.23572  | 1.177494 | 5.123956 | 5.210126 | 1.13E-06 | 4.48E-06 | 4.987147 |
| RNF39    | -0.22616 | 0.854908 | 5.950989 | -5.20828 | 1.14E-06 | 4.51E-06 | 4.979696 |
| KAT2A    | -0.19413 | 0.8741   | 7.258132 | -5.20587 | 1.15E-06 | 4.55E-06 | 4.970005 |
| PTPRU    | -0.17987 | 0.882783 | 5.626923 | -5.20548 | 1.15E-06 | 4.56E-06 | 4.968449 |
| MT1X     | -0.68889 | 0.620329 | 11.70912 | -5.20483 | 1.15E-06 | 4.57E-06 | 4.965821 |
| GTF3C3   | 0.205464 | 1.153057 | 6.457473 | 5.204164 | 1.16E-06 | 4.58E-06 | 4.96314  |
| MRPL18   | 0.163039 | 1.119643 | 9.477363 | 5.203831 | 1.16E-06 | 4.58E-06 | 4.961798 |
| NTAN1    | 0.214242 | 1.160094 | 6.856813 | 5.203756 | 1.16E-06 | 4.58E-06 | 4.961499 |
| SPINK4   | -0.18956 | 0.876876 | 5.106264 | -5.20185 | 1.17E-06 | 4.62E-06 | 4.953821 |
| B3GALNT1 | 0.308671 | 1.238567 | 5.512857 | 5.201453 | 1.17E-06 | 4.62E-06 | 4.95223  |
| ILF2     | 0.312797 | 1.242114 | 8.990549 | 5.200758 | 1.17E-06 | 4.63E-06 | 4.949435 |
| NFASC    | -0.33129 | 0.794828 | 5.038352 | -5.20056 | 1.17E-06 | 4.63E-06 | 4.948618 |
| PSEN1    | 0.213976 | 1.15988  | 7.514725 | 5.20014  | 1.17E-06 | 4.64E-06 | 4.946947 |
| SLC17A7  | -0.19136 | 0.875781 | 5.864286 | -5.19883 | 1.18E-06 | 4.66E-06 | 4.941694 |
| EDRF1    | 0.15399  | 1.112643 | 5.265714 | 5.197368 | 1.19E-06 | 4.69E-06 | 4.935795 |
| CALM3    | 0.163232 | 1.119793 | 7.696154 | 5.196337 | 1.19E-06 | 4.71E-06 | 4.931649 |
| STAT3    | 0.282676 | 1.216449 | 8.83022  | 5.195815 | 1.20E-06 | 4.71E-06 | 4.929548 |
| TSPAN7   | -0.35852 | 0.779963 | 7.779231 | -5.19552 | 1.20E-06 | 4.72E-06 | 4.928348 |
| ACTR8    | 0.165169 | 1.121297 | 6.974286 | 5.192374 | 1.21E-06 | 4.78E-06 | 4.91571  |
| CSRP2    | 0.346531 | 1.2715   | 8.995275 | 5.189557 | 1.23E-06 | 4.83E-06 | 4.904387 |
| PMFBP1   | -0.17645 | 0.884875 | 4.632308 | -5.18768 | 1.24E-06 | 4.87E-06 | 4.896826 |
| BAHCC1   | -0.18196 | 0.881507 | 5.761978 | -5.18662 | 1.24E-06 | 4.89E-06 | 4.892589 |
| ZNF271P  | 0.253981 | 1.192493 | 6.114725 | 5.186131 | 1.25E-06 | 4.90E-06 | 4.890622 |
| NUP155   | 0.186488 | 1.13799  | 5.404176 | 5.182975 | 1.26E-06 | 4.96E-06 | 4.877941 |
| COL1A1   | 0.425903 | 1.343413 | 5.166264 | 5.182137 | 1.27E-06 | 4.97E-06 | 4.874579 |
| ITIH1    | -0.16724 | 0.890544 | 4.531429 | -5.18053 | 1.27E-06 | 5.00E-06 | 4.868144 |
| GSK3A    | -0.15053 | 0.900922 | 7.651868 | -5.18034 | 1.28E-06 | 5.01E-06 | 4.86738  |
| TPPP3    | -0.37354 | 0.771888 | 5.796154 | -5.17973 | 1.28E-06 | 5.02E-06 | 4.864894 |
| PSMA5    | 0.192589 | 1.142813 | 8.811758 | 5.178715 | 1.28E-06 | 5.03E-06 | 4.860835 |
| FLOT1    | 0.218628 | 1.163626 | 8.676374 | 5.178672 | 1.28E-06 | 5.03E-06 | 4.860666 |
| RHCE     | -0.24046 | 0.846476 | 4.84044  | -5.17772 | 1.29E-06 | 5.05E-06 | 4.85684  |
| POLL     | -0.1705  | 0.888533 | 5.993077 | -5.17625 | 1.30E-06 | 5.08E-06 | 4.850951 |

|          |          |          |          |          |          |          |          |
|----------|----------|----------|----------|----------|----------|----------|----------|
| FAM117A  | -0.25898 | 0.835678 | 7.457802 | -5.17623 | 1.30E-06 | 5.08E-06 | 4.850845 |
| CYP11B2  | -0.27758 | 0.824974 | 5.961648 | -5.17508 | 1.30E-06 | 5.10E-06 | 4.846238 |
| RNASEH1  | 0.167976 | 1.123481 | 7.001978 | 5.173699 | 1.31E-06 | 5.13E-06 | 4.840704 |
| MRPL33   | 0.19728  | 1.146535 | 10.07516 | 5.172468 | 1.32E-06 | 5.15E-06 | 4.835765 |
| MYOM2    | -0.36008 | 0.77912  | 7.478242 | -5.17242 | 1.32E-06 | 5.15E-06 | 4.835562 |
| CDV3     | 0.230034 | 1.172862 | 6.815275 | 5.172271 | 1.32E-06 | 5.15E-06 | 4.834974 |
| NHLH1    | -0.21429 | 0.861967 | 5.650769 | -5.17207 | 1.32E-06 | 5.15E-06 | 4.834177 |
| IL6R     | -0.4118  | 0.751684 | 6.265275 | -5.17196 | 1.32E-06 | 5.15E-06 | 4.833732 |
| HNF1A    | -0.23291 | 0.850915 | 6.463736 | -5.17182 | 1.32E-06 | 5.15E-06 | 4.833176 |
| FAM57A   | 0.256531 | 1.194603 | 5.840769 | 5.171518 | 1.32E-06 | 5.16E-06 | 4.831955 |
| CCDC176  | 0.233483 | 1.17567  | 6.832198 | 5.170675 | 1.33E-06 | 5.17E-06 | 4.828574 |
| PRR34    | -0.19676 | 0.872509 | 6.328571 | -5.16943 | 1.34E-06 | 5.20E-06 | 4.823585 |
| CEP57    | 0.184908 | 1.136745 | 6.492308 | 5.166686 | 1.35E-06 | 5.25E-06 | 4.812576 |
| MXI1     | -0.23154 | 0.851727 | 9.236374 | -5.16612 | 1.35E-06 | 5.26E-06 | 4.810296 |
| NR2F1    | -0.27431 | 0.826843 | 7.01022  | -5.16564 | 1.36E-06 | 5.27E-06 | 4.808402 |
| SLC7A10  | -0.21441 | 0.861898 | 5.125495 | -5.16418 | 1.36E-06 | 5.30E-06 | 4.802538 |
| S1PR2    | -0.16173 | 0.89395  | 4.851978 | -5.1628  | 1.37E-06 | 5.33E-06 | 4.79701  |
| HSD3B2   | -0.18577 | 0.879178 | 4.938352 | -5.16264 | 1.37E-06 | 5.33E-06 | 4.796353 |
| KANSL1L  | 0.266778 | 1.203118 | 5.936923 | 5.162185 | 1.38E-06 | 5.34E-06 | 4.794535 |
| C12orf43 | 0.163961 | 1.120359 | 5.949341 | 5.161905 | 1.38E-06 | 5.34E-06 | 4.793413 |
| F12      | 0.369966 | 1.292323 | 5.811429 | 5.161187 | 1.38E-06 | 5.36E-06 | 4.790533 |
| TIA1     | 0.22087  | 1.165436 | 6.108352 | 5.160574 | 1.39E-06 | 5.37E-06 | 4.788079 |
| RNF111   | 0.200266 | 1.14891  | 7.060989 | 5.159232 | 1.39E-06 | 5.39E-06 | 4.782703 |
| NELL2    | -0.29652 | 0.814213 | 5.23989  | -5.15875 | 1.40E-06 | 5.40E-06 | 4.78078  |
| PDCD4    | 0.245512 | 1.185513 | 6.429451 | 5.157467 | 1.40E-06 | 5.43E-06 | 4.77563  |
| OR2C1    | -0.17717 | 0.884437 | 5.06978  | -5.15698 | 1.41E-06 | 5.44E-06 | 4.773665 |
| EIF4A3   | 0.204981 | 1.152671 | 9.105495 | 5.156273 | 1.41E-06 | 5.45E-06 | 4.770847 |
| PER2     | -0.33853 | 0.790849 | 6.268901 | -5.15619 | 1.41E-06 | 5.45E-06 | 4.770508 |
| FUT4     | 0.277961 | 1.21248  | 5.475714 | 5.155898 | 1.41E-06 | 5.45E-06 | 4.769345 |
| ZNF646   | -0.20098 | 0.869962 | 5.356703 | -5.15456 | 1.42E-06 | 5.48E-06 | 4.763995 |
| SP110    | 0.25101  | 1.19004  | 6.35956  | 5.15381  | 1.42E-06 | 5.50E-06 | 4.760986 |
| PTTG1    | 0.397454 | 1.317181 | 7.501978 | 5.153537 | 1.43E-06 | 5.50E-06 | 4.759893 |
| PTGES2   | -0.15035 | 0.90103  | 7.88978  | -5.15223 | 1.43E-06 | 5.53E-06 | 4.754667 |
| DCTN4    | 0.19514  | 1.144835 | 7.127802 | 5.152083 | 1.43E-06 | 5.53E-06 | 4.75407  |
| CYP2A13  | -0.23368 | 0.850465 | 5.629011 | -5.15164 | 1.44E-06 | 5.54E-06 | 4.752311 |
| NEUROD4  | -0.19721 | 0.872237 | 4.258132 | -5.15043 | 1.44E-06 | 5.56E-06 | 4.747441 |
| EXPH5    | -0.25086 | 0.840393 | 5.687033 | -5.15003 | 1.45E-06 | 5.57E-06 | 4.745853 |
| SND1     | 0.188343 | 1.139454 | 8.398571 | 5.149934 | 1.45E-06 | 5.57E-06 | 4.745469 |
| YY2      | -0.21127 | 0.863776 | 5.578352 | -5.14894 | 1.45E-06 | 5.59E-06 | 4.741493 |
| AVP      | -0.23342 | 0.850619 | 5.530879 | -5.14796 | 1.46E-06 | 5.61E-06 | 4.737587 |
| HAND1    | -0.25138 | 0.840091 | 5.293516 | -5.14569 | 1.47E-06 | 5.66E-06 | 4.728479 |
| HAT1     | 0.248053 | 1.187603 | 7.685055 | 5.142935 | 1.49E-06 | 5.72E-06 | 4.717468 |
| NLGN1    | 0.266676 | 1.203033 | 5.162308 | 5.141045 | 1.50E-06 | 5.76E-06 | 4.709908 |
| TKT      | 0.424792 | 1.342379 | 8.595714 | 5.140826 | 1.50E-06 | 5.77E-06 | 4.709036 |
| ESF1     | 0.223179 | 1.167303 | 6.663407 | 5.137641 | 1.52E-06 | 5.84E-06 | 4.696303 |
| ZC3H7B   | -0.17439 | 0.886141 | 6.646154 | -5.13731 | 1.53E-06 | 5.85E-06 | 4.694959 |
| HLA-DQB1 | 0.884444 | 1.846054 | 6.487363 | 5.135062 | 1.54E-06 | 5.90E-06 | 4.685994 |

|           |          |          |          |          |          |          |          |
|-----------|----------|----------|----------|----------|----------|----------|----------|
| ZNF281    | 0.241575 | 1.182283 | 5.98033  | 5.134964 | 1.54E-06 | 5.90E-06 | 4.685604 |
| MAP2K3    | -0.24146 | 0.845889 | 7.874945 | -5.13477 | 1.54E-06 | 5.90E-06 | 4.684816 |
| UBE2V2    | 0.168971 | 1.124256 | 7.587253 | 5.134116 | 1.55E-06 | 5.91E-06 | 4.682215 |
| TOR3A     | 0.229372 | 1.172325 | 6.725165 | 5.132279 | 1.56E-06 | 5.96E-06 | 4.674875 |
| MLLT3     | 0.210217 | 1.156862 | 5.553736 | 5.131496 | 1.56E-06 | 5.97E-06 | 4.67175  |
| FRY       | -0.30435 | 0.809805 | 4.973626 | -5.13071 | 1.57E-06 | 5.99E-06 | 4.668625 |
| PPARA     | -0.17695 | 0.884573 | 5.54989  | -5.13056 | 1.57E-06 | 5.99E-06 | 4.667993 |
| VBP1      | 0.154213 | 1.112814 | 9.085824 | 5.130099 | 1.57E-06 | 6.00E-06 | 4.666169 |
| TFPI      | 0.348362 | 1.273115 | 6.888571 | 5.129383 | 1.58E-06 | 6.01E-06 | 4.663308 |
| WDR73     | 0.161174 | 1.118197 | 7.352527 | 5.126473 | 1.60E-06 | 6.08E-06 | 4.651689 |
| PNPLA3    | -0.39138 | 0.762402 | 6.164505 | -5.12593 | 1.60E-06 | 6.09E-06 | 4.649529 |
| CAMKV     | -0.22976 | 0.852775 | 5.837033 | -5.12523 | 1.60E-06 | 6.11E-06 | 4.646746 |
| IL18      | 0.36656  | 1.289275 | 5.156484 | 5.12474  | 1.61E-06 | 6.12E-06 | 4.644772 |
| ITPKC     | -0.22434 | 0.855988 | 6.173846 | -5.12343 | 1.62E-06 | 6.15E-06 | 4.639549 |
| DCHS2     | -0.15227 | 0.899836 | 4.892747 | -5.12239 | 1.62E-06 | 6.17E-06 | 4.635404 |
| SRPK3     | -0.23617 | 0.848994 | 5.315385 | -5.12033 | 1.64E-06 | 6.22E-06 | 4.627176 |
| PRKX      | 0.3333   | 1.259892 | 4.883297 | 5.120252 | 1.64E-06 | 6.22E-06 | 4.626864 |
| BCAT2     | 0.298628 | 1.229974 | 7.735934 | 5.119702 | 1.64E-06 | 6.23E-06 | 4.624668 |
| C14orf169 | 0.224386 | 1.16828  | 7.628352 | 5.118614 | 1.65E-06 | 6.26E-06 | 4.620328 |
| NMRK1     | -0.3161  | 0.803238 | 8.309121 | -5.11708 | 1.66E-06 | 6.30E-06 | 4.614211 |
| MRPL49    | -0.1456  | 0.904001 | 10.01582 | -5.11669 | 1.66E-06 | 6.30E-06 | 4.612659 |
| BAAT      | -0.18089 | 0.882159 | 5.230549 | -5.1159  | 1.67E-06 | 6.32E-06 | 4.609519 |
| MAP6D1    | -0.17121 | 0.888099 | 5.590989 | -5.11472 | 1.67E-06 | 6.35E-06 | 4.604783 |
| FAM63A    | 0.230391 | 1.173153 | 7.961538 | 5.114381 | 1.68E-06 | 6.36E-06 | 4.603448 |
| OR7A5     | -0.18937 | 0.876987 | 5.014615 | -5.11221 | 1.69E-06 | 6.41E-06 | 4.594797 |
| COL18A1   | 0.293599 | 1.225694 | 7.637143 | 5.109294 | 1.71E-06 | 6.48E-06 | 4.583171 |
| ALDH3A1   | -0.2269  | 0.85447  | 4.927363 | -5.10818 | 1.72E-06 | 6.51E-06 | 4.578749 |
| DSG2      | 0.281923 | 1.215814 | 8.275934 | 5.10796  | 1.72E-06 | 6.51E-06 | 4.577858 |
| CXXC4     | -0.19676 | 0.872506 | 4.508352 | -5.1078  | 1.72E-06 | 6.52E-06 | 4.577219 |
| SH2D2A    | -0.23721 | 0.848383 | 5.948132 | -5.1071  | 1.73E-06 | 6.53E-06 | 4.574447 |
| SHC1      | 0.186763 | 1.138207 | 7.296703 | 5.106581 | 1.73E-06 | 6.54E-06 | 4.572362 |
| HSD11B2   | -0.52824 | 0.693399 | 9.547912 | -5.10623 | 1.73E-06 | 6.55E-06 | 4.570948 |
| ANKRD55   | -0.34033 | 0.789859 | 4.666703 | -5.10518 | 1.74E-06 | 6.58E-06 | 4.566764 |
| ZNRF4     | -0.17487 | 0.885848 | 5.914396 | -5.10408 | 1.75E-06 | 6.60E-06 | 4.562398 |
| PDE4C     | -0.17481 | 0.885886 | 5.647253 | -5.10238 | 1.76E-06 | 6.64E-06 | 4.555626 |
| OR52A1    | -0.17351 | 0.886684 | 4.326374 | -5.10234 | 1.76E-06 | 6.64E-06 | 4.555484 |
| BTN3A3    | 0.341971 | 1.267487 | 4.687802 | 5.101886 | 1.77E-06 | 6.65E-06 | 4.553663 |
| DPP6      | -0.43797 | 0.738175 | 5.584945 | -5.1016  | 1.77E-06 | 6.66E-06 | 4.552543 |
| ZBTB22    | -0.19417 | 0.874073 | 6.266154 | -5.10151 | 1.77E-06 | 6.66E-06 | 4.552161 |
| LOC10013  | -0.18834 | 0.877616 | 4.921648 | -5.10128 | 1.77E-06 | 6.66E-06 | 4.551256 |
| PSME3     | 0.188232 | 1.139366 | 7.313516 | 5.099168 | 1.79E-06 | 6.72E-06 | 4.542845 |
| WRAP73    | 0.169343 | 1.124546 | 5.074176 | 5.099053 | 1.79E-06 | 6.72E-06 | 4.542387 |
| ZC3H4     | 0.230604 | 1.173326 | 8.481209 | 5.098071 | 1.79E-06 | 6.74E-06 | 4.538478 |
| HSPA12A   | -0.27463 | 0.826663 | 7.795934 | -5.09719 | 1.80E-06 | 6.76E-06 | 4.534954 |
| GRIA3     | -0.16295 | 0.893199 | 4.156813 | -5.09699 | 1.80E-06 | 6.77E-06 | 4.53417  |
| CTSA      | 0.260527 | 1.197916 | 11.03253 | 5.09536  | 1.81E-06 | 6.81E-06 | 4.527691 |
| ZNF34     | -0.17777 | 0.884067 | 5.052308 | -5.09498 | 1.82E-06 | 6.82E-06 | 4.526181 |

|           |          |          |          |          |          |          |          |
|-----------|----------|----------|----------|----------|----------|----------|----------|
| PEA15     | 0.314681 | 1.243737 | 7.476264 | 5.094725 | 1.82E-06 | 6.82E-06 | 4.525163 |
| LINC01136 | -0.18595 | 0.879069 | 4.94022  | -5.09404 | 1.82E-06 | 6.84E-06 | 4.522453 |
| TRMT2A    | -0.15928 | 0.895472 | 6.523626 | -5.09258 | 1.84E-06 | 6.87E-06 | 4.516612 |
| PHYH      | -0.37334 | 0.771992 | 11.07495 | -5.09246 | 1.84E-06 | 6.87E-06 | 4.51614  |
| GALNT2    | 0.270826 | 1.206498 | 6.551099 | 5.092323 | 1.84E-06 | 6.88E-06 | 4.51561  |
| SLC7A7    | -0.49496 | 0.709581 | 11.84198 | -5.09217 | 1.84E-06 | 6.88E-06 | 4.515018 |
| ZNF292    | 0.216014 | 1.16152  | 5.927473 | 5.08985  | 1.86E-06 | 6.94E-06 | 4.505772 |
| BTF3      | 0.213681 | 1.159643 | 10.05132 | 5.088384 | 1.87E-06 | 6.98E-06 | 4.499944 |
| ABL1      | 0.22713  | 1.170504 | 7.843187 | 5.087306 | 1.88E-06 | 7.01E-06 | 4.495658 |
| MAN2C1    | -0.19839 | 0.871522 | 6.904286 | -5.08725 | 1.88E-06 | 7.01E-06 | 4.495438 |
| ALOX5AP   | 0.580599 | 1.49547  | 6.434066 | 5.086895 | 1.88E-06 | 7.01E-06 | 4.494025 |
| SLC22A6   | -0.46508 | 0.72443  | 9.761319 | -5.08616 | 1.88E-06 | 7.03E-06 | 4.491095 |
| LRRC3     | -0.14852 | 0.902174 | 4.183077 | -5.08584 | 1.89E-06 | 7.04E-06 | 4.48984  |
| KCNS1     | -0.21257 | 0.863001 | 6.439451 | -5.08551 | 1.89E-06 | 7.04E-06 | 4.488507 |
| SFN       | 0.529502 | 1.443431 | 7.189451 | 5.08465  | 1.90E-06 | 7.07E-06 | 4.485101 |
| DDX50     | 0.279174 | 1.2135   | 7.940879 | 5.083966 | 1.90E-06 | 7.08E-06 | 4.482383 |
| PSMA6     | 0.262894 | 1.199883 | 10.36022 | 5.083772 | 1.90E-06 | 7.08E-06 | 4.481612 |
| NUP54     | 0.206575 | 1.153945 | 7.228022 | 5.083008 | 1.91E-06 | 7.10E-06 | 4.478579 |
| BCAS3     | -0.19481 | 0.873687 | 6.897143 | -5.07997 | 1.93E-06 | 7.19E-06 | 4.466515 |
| SLC26A10  | -0.19429 | 0.874    | 4.500659 | -5.07883 | 1.94E-06 | 7.22E-06 | 4.461971 |
| DPY19L1   | 0.25229  | 1.191096 | 5.377802 | 5.078029 | 1.95E-06 | 7.24E-06 | 4.458801 |
| MS4A12    | -0.14995 | 0.901281 | 3.848022 | -5.07754 | 1.95E-06 | 7.25E-06 | 4.456878 |
| NAP1L4    | 0.191778 | 1.14217  | 7.804835 | 5.075591 | 1.97E-06 | 7.31E-06 | 4.449122 |
| GLRX      | -0.18163 | 0.881707 | 10.32692 | -5.07478 | 1.97E-06 | 7.32E-06 | 4.445886 |
| GRIK3     | -0.17342 | 0.886738 | 4.17033  | -5.07472 | 1.98E-06 | 7.32E-06 | 4.44565  |
| CYP24A1   | 1.157329 | 2.23044  | 7.002088 | 5.07471  | 1.98E-06 | 7.32E-06 | 4.445622 |
| ERGIC3    | 0.15015  | 1.109685 | 9.530989 | 5.069443 | 2.02E-06 | 7.48E-06 | 4.42472  |
| WT1-AS    | -0.19383 | 0.874284 | 5.341978 | -5.06934 | 2.02E-06 | 7.48E-06 | 4.424315 |
| AURKC     | -0.22051 | 0.858264 | 4.938132 | -5.06911 | 2.02E-06 | 7.49E-06 | 4.423409 |
| WNT7B     | -0.22462 | 0.855821 | 5.481099 | -5.06732 | 2.04E-06 | 7.54E-06 | 4.416288 |
| COL4A3BP  | 0.322633 | 1.250611 | 6.608022 | 5.066061 | 2.05E-06 | 7.57E-06 | 4.411304 |
| ZBP1      | -0.14851 | 0.902183 | 4.473736 | -5.06564 | 2.05E-06 | 7.58E-06 | 4.409637 |
| SLURP1    | -0.1515  | 0.900312 | 4.117473 | -5.06386 | 2.07E-06 | 7.64E-06 | 4.402575 |
| SH3GL2    | -0.50926 | 0.702582 | 7.201429 | -5.06331 | 2.07E-06 | 7.65E-06 | 4.400409 |
| HIST1H2BK | 0.526749 | 1.440679 | 7.034176 | 5.063045 | 2.07E-06 | 7.65E-06 | 4.399346 |
| SATB2     | 0.55543  | 1.469607 | 7.059011 | 5.062445 | 2.08E-06 | 7.67E-06 | 4.396967 |
| CSTA      | 0.590469 | 1.505736 | 4.683077 | 5.0624   | 2.08E-06 | 7.67E-06 | 4.39679  |
| PTMS      | -0.29225 | 0.81663  | 6.354396 | -5.06201 | 2.08E-06 | 7.68E-06 | 4.395241 |
| RAN       | 0.239647 | 1.180704 | 8.232637 | 5.061841 | 2.08E-06 | 7.68E-06 | 4.394573 |
| TMPO      | 0.18044  | 1.133229 | 5.349011 | 5.060002 | 2.10E-06 | 7.73E-06 | 4.387282 |
| CCDC106   | -0.15243 | 0.899737 | 5.445495 | -5.05968 | 2.10E-06 | 7.74E-06 | 4.38599  |
| CDH17     | -0.16955 | 0.88912  | 5.026374 | -5.05953 | 2.10E-06 | 7.74E-06 | 4.385424 |
| CD48      | 0.732802 | 1.661864 | 6.178462 | 5.05913  | 2.11E-06 | 7.75E-06 | 4.383828 |
| ME1       | 0.41313  | 1.331572 | 4.955165 | 5.057961 | 2.12E-06 | 7.79E-06 | 4.379197 |
| DAO       | -0.62706 | 0.647493 | 9.272088 | -5.05743 | 2.12E-06 | 7.80E-06 | 4.377099 |
| IGFBP4    | -0.41961 | 0.747625 | 9.50989  | -5.05526 | 2.14E-06 | 7.87E-06 | 4.368509 |
| DYNC1LI2  | 0.206314 | 1.153737 | 8.236154 | 5.054144 | 2.15E-06 | 7.90E-06 | 4.364074 |

|           |          |          |          |          |          |          |          |
|-----------|----------|----------|----------|----------|----------|----------|----------|
| IL10RA    | 0.444348 | 1.360699 | 5.425385 | 5.053277 | 2.16E-06 | 7.92E-06 | 4.360643 |
| DNPH1     | -0.21344 | 0.862476 | 9.919451 | -5.05193 | 2.17E-06 | 7.96E-06 | 4.355323 |
| CLDN1     | 0.48985  | 1.404299 | 5.305495 | 5.051931 | 2.17E-06 | 7.96E-06 | 4.35531  |
| DLG3      | 0.155932 | 1.114141 | 6.124066 | 5.051639 | 2.17E-06 | 7.97E-06 | 4.354156 |
| BCKDHA    | -0.18692 | 0.878478 | 8.796044 | -5.05158 | 2.17E-06 | 7.97E-06 | 4.353938 |
| NPHS2     | -1.09789 | 0.4672   | 8.462088 | -5.04943 | 2.19E-06 | 8.03E-06 | 4.345419 |
| RBFOX1    | -0.17509 | 0.885711 | 4.784286 | -5.04942 | 2.19E-06 | 8.03E-06 | 4.345356 |
| PAPOLA    | 0.186304 | 1.137845 | 7.985824 | 5.04926  | 2.19E-06 | 8.03E-06 | 4.344736 |
| EPB42     | -0.19336 | 0.874565 | 4.533077 | -5.0486  | 2.20E-06 | 8.05E-06 | 4.342123 |
| GRB10     | -0.23959 | 0.846984 | 7.90978  | -5.0484  | 2.20E-06 | 8.05E-06 | 4.34134  |
| NRBF2     | 0.265638 | 1.202167 | 5.075055 | 5.047973 | 2.21E-06 | 8.06E-06 | 4.339643 |
| MXRA8     | -0.24835 | 0.841857 | 7.281319 | -5.04739 | 2.21E-06 | 8.08E-06 | 4.33735  |
| SERPINA1C | -0.17597 | 0.885172 | 4.174286 | -5.04714 | 2.21E-06 | 8.08E-06 | 4.336349 |
| ABCC3     | 0.473913 | 1.388871 | 6.63044  | 5.046576 | 2.22E-06 | 8.10E-06 | 4.334115 |
| DHCR24    | 0.331391 | 1.258226 | 7.396484 | 5.044937 | 2.23E-06 | 8.15E-06 | 4.327628 |
| HNMT      | -0.216   | 0.860952 | 7.663407 | -5.04472 | 2.23E-06 | 8.15E-06 | 4.326756 |
| PLBD1     | 0.264715 | 1.201399 | 8.563077 | 5.043779 | 2.24E-06 | 8.18E-06 | 4.323049 |
| THOC6     | 0.230367 | 1.173133 | 5.92044  | 5.04302  | 2.25E-06 | 8.20E-06 | 4.320045 |
| FGF6      | -0.16903 | 0.889441 | 5.99011  | -5.04183 | 2.26E-06 | 8.24E-06 | 4.315341 |
| CLN5      | 0.195903 | 1.145441 | 7.942527 | 5.040683 | 2.27E-06 | 8.28E-06 | 4.3108   |
| LASP1     | 0.206575 | 1.153945 | 9.068022 | 5.040422 | 2.27E-06 | 8.28E-06 | 4.309768 |
| DHRS3     | -0.2998  | 0.812364 | 8.920659 | -5.03976 | 2.28E-06 | 8.30E-06 | 4.307156 |
| LINC01565 | -0.17691 | 0.884594 | 4.921429 | -5.03761 | 2.30E-06 | 8.37E-06 | 4.298635 |
| ASIC2     | -0.17615 | 0.885062 | 4.626154 | -5.03559 | 2.32E-06 | 8.44E-06 | 4.290665 |
| CHMP4A    | 0.165966 | 1.121917 | 8.180549 | 5.035196 | 2.32E-06 | 8.45E-06 | 4.28911  |
| ABCA1     | 0.418604 | 1.336633 | 8.524176 | 5.033085 | 2.34E-06 | 8.52E-06 | 4.280768 |
| PDE6A     | -0.22859 | 0.853466 | 4.86022  | -5.03232 | 2.35E-06 | 8.54E-06 | 4.277755 |
| HOXB6     | 0.30701  | 1.237141 | 6.427253 | 5.031576 | 2.36E-06 | 8.56E-06 | 4.274805 |
| HMP19     | -0.174   | 0.886385 | 4.544176 | -5.03075 | 2.37E-06 | 8.59E-06 | 4.271526 |
| HBEGF     | -0.46984 | 0.722047 | 5.745055 | -5.02987 | 2.38E-06 | 8.61E-06 | 4.268063 |
| SLC8A2    | -0.18012 | 0.882629 | 4.935495 | -5.02922 | 2.38E-06 | 8.63E-06 | 4.265505 |
| MAST3     | -0.2011  | 0.869886 | 6.350989 | -5.02713 | 2.40E-06 | 8.70E-06 | 4.257233 |
| SLC22A14  | -0.22255 | 0.857049 | 7.165165 | -5.02537 | 2.42E-06 | 8.76E-06 | 4.250306 |
| ITGA8     | -0.21762 | 0.859981 | 4.999341 | -5.02231 | 2.45E-06 | 8.87E-06 | 4.238221 |
| KDM5C     | -0.17163 | 0.88784  | 6.681868 | -5.02109 | 2.46E-06 | 8.91E-06 | 4.233422 |
| NPFF      | -0.14189 | 0.906332 | 4.614835 | -5.02026 | 2.47E-06 | 8.94E-06 | 4.230121 |
| MEPE      | -0.20057 | 0.87021  | 5.355385 | -5.01924 | 2.48E-06 | 8.97E-06 | 4.226097 |
| SS18L1    | -0.25059 | 0.84055  | 6.809341 | -5.01674 | 2.51E-06 | 9.06E-06 | 4.216242 |
| ATP1A3    | -0.13964 | 0.907747 | 4.277253 | -5.0159  | 2.52E-06 | 9.09E-06 | 4.212919 |
| ADH6      | -0.38803 | 0.764173 | 8.536813 | -5.01462 | 2.53E-06 | 9.13E-06 | 4.207885 |
| GZMA      | 0.602802 | 1.518663 | 4.994176 | 5.013893 | 2.54E-06 | 9.15E-06 | 4.205018 |
| UBE3C     | 0.233614 | 1.175776 | 6.828132 | 5.013773 | 2.54E-06 | 9.15E-06 | 4.204545 |
| IFT122    | 0.242304 | 1.182881 | 7.373516 | 5.013523 | 2.54E-06 | 9.16E-06 | 4.203558 |
| FJX1      | 0.253391 | 1.192006 | 5.567912 | 5.012585 | 2.55E-06 | 9.19E-06 | 4.199861 |
| FGF5      | -0.15832 | 0.896069 | 4.557363 | -5.0118  | 2.56E-06 | 9.22E-06 | 4.196753 |
| CRAT      | -0.18162 | 0.881713 | 7.737363 | -5.01149 | 2.56E-06 | 9.22E-06 | 4.195525 |
| GNG13     | -0.14388 | 0.905082 | 4.004286 | -5.01136 | 2.56E-06 | 9.23E-06 | 4.195023 |

|           |          |          |          |          |          |          |          |
|-----------|----------|----------|----------|----------|----------|----------|----------|
| PKP2      | -0.21603 | 0.860929 | 5.271648 | -5.0109  | 2.57E-06 | 9.24E-06 | 4.193211 |
| HGFAC     | -0.19301 | 0.874776 | 4.478901 | -5.00979 | 2.58E-06 | 9.28E-06 | 4.188835 |
| ZFP30     | 0.186541 | 1.138032 | 6.036593 | 5.008659 | 2.59E-06 | 9.32E-06 | 4.184388 |
| TULP2     | -0.17293 | 0.887038 | 5.162527 | -5.00803 | 2.60E-06 | 9.34E-06 | 4.181913 |
| FCGRT     | -0.27    | 0.829322 | 9.506703 | -5.00729 | 2.61E-06 | 9.36E-06 | 4.178989 |
| CCNJL     | -0.20961 | 0.864769 | 5.433736 | -5.00691 | 2.61E-06 | 9.37E-06 | 4.177515 |
| RAX       | -0.21587 | 0.861027 | 5.949121 | -5.0069  | 2.61E-06 | 9.37E-06 | 4.177471 |
| ECHDC2    | -0.22147 | 0.857689 | 10.50418 | -5.00634 | 2.62E-06 | 9.38E-06 | 4.175234 |
| TTF2      | 0.222072 | 1.166408 | 4.063077 | 5.005727 | 2.62E-06 | 9.40E-06 | 4.172837 |
| SCFD1     | 0.174198 | 1.128337 | 6.695055 | 5.004875 | 2.63E-06 | 9.43E-06 | 4.169482 |
| LOC10050  | -0.17322 | 0.88686  | 5.989341 | -5.00381 | 2.64E-06 | 9.47E-06 | 4.165281 |
| CHRN2     | -0.15446 | 0.898469 | 6.882967 | -5.00377 | 2.64E-06 | 9.47E-06 | 4.165142 |
| FGF16     | -0.17872 | 0.883484 | 4.449011 | -5.00337 | 2.65E-06 | 9.48E-06 | 4.163537 |
| N6AMT1    | 0.270778 | 1.206458 | 5.228901 | 5.001853 | 2.66E-06 | 9.53E-06 | 4.157579 |
| RCBTB1    | 0.365647 | 1.28846  | 6.384945 | 4.999403 | 2.69E-06 | 9.63E-06 | 4.147934 |
| HTR1F     | -0.16546 | 0.891642 | 4.242308 | -4.99815 | 2.70E-06 | 9.67E-06 | 4.143012 |
| INTS12    | 0.190874 | 1.141455 | 7.303736 | 4.996889 | 2.72E-06 | 9.72E-06 | 4.138042 |
| PPP6R1    | -0.14495 | 0.90441  | 7.075495 | -4.9922  | 2.77E-06 | 9.90E-06 | 4.119583 |
| R3HCC1    | -0.1549  | 0.898196 | 8.182967 | -4.99151 | 2.78E-06 | 9.92E-06 | 4.116867 |
| SMARCD3   | 0.265    | 1.201636 | 5.616044 | 4.989315 | 2.80E-06 | 1.00E-05 | 4.10825  |
| BAZ1A     | 0.28244  | 1.21625  | 4.809451 | 4.989057 | 2.81E-06 | 1.00E-05 | 4.107235 |
| PRORY     | -0.20804 | 0.865713 | 5.425385 | -4.98861 | 2.81E-06 | 1.00E-05 | 4.105479 |
| PEX19     | -0.14819 | 0.90238  | 7.858022 | -4.98717 | 2.83E-06 | 1.01E-05 | 4.099814 |
| VTCN1     | 0.610671 | 1.52697  | 6.492198 | 4.98676  | 2.83E-06 | 1.01E-05 | 4.098207 |
| SAFB2     | -0.16156 | 0.894058 | 7.63989  | -4.98622 | 2.84E-06 | 1.01E-05 | 4.096066 |
| ZNF862    | -0.18562 | 0.879272 | 6.875385 | -4.98607 | 2.84E-06 | 1.01E-05 | 4.095476 |
| TAF1      | -0.1789  | 0.883377 | 6.191099 | -4.98427 | 2.86E-06 | 1.02E-05 | 4.08843  |
| RNF122    | -0.2002  | 0.870431 | 6.552088 | -4.98289 | 2.88E-06 | 1.02E-05 | 4.083005 |
| ALG6      | 0.216855 | 1.162197 | 7.005714 | 4.982682 | 2.88E-06 | 1.02E-05 | 4.082183 |
| ABCG4     | -0.17481 | 0.885886 | 5.337253 | -4.9813  | 2.90E-06 | 1.03E-05 | 4.076748 |
| FOXN3-AS1 | -0.17891 | 0.883371 | 4.490659 | -4.98017 | 2.91E-06 | 1.03E-05 | 4.072327 |
| UPK1A     | -0.17158 | 0.887867 | 4.373846 | -4.97945 | 2.92E-06 | 1.04E-05 | 4.069506 |
| GLB1L2    | -0.33527 | 0.792638 | 8.767253 | -4.97896 | 2.92E-06 | 1.04E-05 | 4.067559 |
| CRK       | 0.171768 | 1.126438 | 8.264505 | 4.978391 | 2.93E-06 | 1.04E-05 | 4.06533  |
| CACNA1S   | -0.18182 | 0.881592 | 4.578352 | -4.97754 | 2.94E-06 | 1.04E-05 | 4.062    |
| PFKFB1    | -0.22523 | 0.855458 | 5.603187 | -4.97718 | 2.95E-06 | 1.04E-05 | 4.060576 |
| SLC5A7    | -0.15523 | 0.897988 | 4.477802 | -4.97585 | 2.96E-06 | 1.05E-05 | 4.055366 |
| C22orf46  | -0.13721 | 0.909277 | 4.417802 | -4.9751  | 2.97E-06 | 1.05E-05 | 4.052389 |
| NRIP2     | -0.21847 | 0.859474 | 5.020659 | -4.97429 | 2.98E-06 | 1.06E-05 | 4.049216 |
| PSG4      | -0.40329 | 0.756135 | 5.112747 | -4.97376 | 2.99E-06 | 1.06E-05 | 4.047134 |
| CCT6B     | -0.35111 | 0.783983 | 5.466593 | -4.97241 | 3.00E-06 | 1.06E-05 | 4.04184  |
| CTLA4     | -0.17514 | 0.885684 | 4.552308 | -4.97109 | 3.02E-06 | 1.07E-05 | 4.036681 |
| CYP2B6    | -0.4242  | 0.74525  | 5.761099 | -4.97098 | 3.02E-06 | 1.07E-05 | 4.036238 |
| PPFIA2    | -0.15981 | 0.895142 | 4.829451 | -4.97064 | 3.03E-06 | 1.07E-05 | 4.034903 |
| CBX5      | 0.242981 | 1.183435 | 5.894286 | 4.970272 | 3.03E-06 | 1.07E-05 | 4.033464 |
| CCDC87    | -0.185   | 0.879652 | 5.393736 | -4.96905 | 3.05E-06 | 1.08E-05 | 4.02868  |
| ARHGAP32  | -0.15118 | 0.900511 | 5.721978 | -4.96763 | 3.06E-06 | 1.08E-05 | 4.023098 |

|           |          |          |          |          |          |          |          |
|-----------|----------|----------|----------|----------|----------|----------|----------|
| ITGA9     | -0.16146 | 0.89412  | 4.674505 | -4.96737 | 3.07E-06 | 1.08E-05 | 4.022083 |
| GRAP2     | -0.17263 | 0.887225 | 4.876374 | -4.96691 | 3.07E-06 | 1.08E-05 | 4.020294 |
| CCL1      | -0.16628 | 0.89114  | 4.495385 | -4.96641 | 3.08E-06 | 1.09E-05 | 4.018306 |
| TRAM2     | 0.217517 | 1.162731 | 6.135824 | 4.965681 | 3.09E-06 | 1.09E-05 | 4.015456 |
| TCEB1     | 0.146918 | 1.107202 | 7.253956 | 4.96406  | 3.11E-06 | 1.09E-05 | 4.009101 |
| DTX2P1-UI | -0.20695 | 0.866366 | 9.754835 | -4.96371 | 3.11E-06 | 1.10E-05 | 4.007728 |
| HYAL1     | -0.23356 | 0.850536 | 9.564505 | -4.96322 | 3.12E-06 | 1.10E-05 | 4.005793 |
| PDZD7     | -0.1818  | 0.881604 | 5.509231 | -4.96164 | 3.14E-06 | 1.10E-05 | 3.99961  |
| ZNF76     | -0.1487  | 0.902066 | 7.015165 | -4.96022 | 3.16E-06 | 1.11E-05 | 3.994064 |
| GLYAT     | -0.37658 | 0.770259 | 10.47747 | -4.95833 | 3.18E-06 | 1.12E-05 | 3.986665 |
| FN1       | 0.341203 | 1.266812 | 6.082857 | 4.957904 | 3.19E-06 | 1.12E-05 | 3.984975 |
| RORA      | -0.33043 | 0.795297 | 6.367033 | -4.95787 | 3.19E-06 | 1.12E-05 | 3.984848 |
| TRA2A     | 0.278589 | 1.213008 | 8.184286 | 4.957864 | 3.19E-06 | 1.12E-05 | 3.984819 |
| PECAM1    | 0.351068 | 1.275504 | 6.861648 | 4.95626  | 3.21E-06 | 1.13E-05 | 3.978536 |
| SMPDL3B   | 0.211174 | 1.15763  | 5.807253 | 4.955369 | 3.22E-06 | 1.13E-05 | 3.975049 |
| NUP210    | -0.12645 | 0.91608  | 5.677033 | -4.95485 | 3.23E-06 | 1.13E-05 | 3.973035 |
| FKBP1A    | 0.212048 | 1.158332 | 6.337033 | 4.954777 | 3.23E-06 | 1.13E-05 | 3.972729 |
| IL1RAPL2  | -0.19029 | 0.87643  | 5.072857 | -4.95475 | 3.23E-06 | 1.13E-05 | 3.972607 |
| PRPF19    | 0.21158  | 1.157955 | 7.765714 | 4.953506 | 3.24E-06 | 1.14E-05 | 3.967754 |
| LUZP4     | -0.15135 | 0.900406 | 5.844286 | -4.95076 | 3.28E-06 | 1.15E-05 | 3.957016 |
| BIN3-IT1  | -0.17646 | 0.884869 | 4.891868 | -4.95048 | 3.28E-06 | 1.15E-05 | 3.955922 |
| ABCG2     | -0.45269 | 0.730679 | 5.975055 | -4.94968 | 3.29E-06 | 1.15E-05 | 3.952772 |
| TDRD7     | 0.279778 | 1.214008 | 6.558352 | 4.949468 | 3.30E-06 | 1.15E-05 | 3.951946 |
| UFD1L     | 0.241092 | 1.181887 | 7.908352 | 4.949046 | 3.30E-06 | 1.15E-05 | 3.950294 |
| ESRRA     | -0.18285 | 0.880964 | 6.391538 | -4.94899 | 3.30E-06 | 1.15E-05 | 3.950065 |
| GALNT10   | 0.187063 | 1.138444 | 6.13033  | 4.947659 | 3.32E-06 | 1.16E-05 | 3.944867 |
| PLS3      | 0.212092 | 1.158367 | 9.909011 | 4.947583 | 3.32E-06 | 1.16E-05 | 3.944571 |
| CHP2      | -0.68058 | 0.623912 | 6.427143 | -4.94728 | 3.33E-06 | 1.16E-05 | 3.943371 |
| SLC12A2   | -0.20882 | 0.865244 | 7.00978  | -4.94635 | 3.34E-06 | 1.16E-05 | 3.939738 |
| APOB      | -0.18001 | 0.882694 | 4.25033  | -4.9462  | 3.34E-06 | 1.17E-05 | 3.939166 |
| TFPI2     | 0.780314 | 1.717505 | 5.44     | 4.945037 | 3.36E-06 | 1.17E-05 | 3.934611 |
| MX1       | 0.718676 | 1.645671 | 7.085824 | 4.944746 | 3.36E-06 | 1.17E-05 | 3.93347  |
| GJB5      | -0.18921 | 0.877084 | 4.411868 | -4.94315 | 3.38E-06 | 1.18E-05 | 3.927223 |
| GADD45G   | -0.44532 | 0.73442  | 5.32022  | -4.94284 | 3.39E-06 | 1.18E-05 | 3.926007 |
| DPY19L4   | 0.25771  | 1.19558  | 6.514396 | 4.942013 | 3.40E-06 | 1.18E-05 | 3.922782 |
| GLRB      | 0.203531 | 1.151514 | 4.12956  | 4.941973 | 3.40E-06 | 1.18E-05 | 3.922629 |
| CST6      | 0.332889 | 1.259533 | 4.474615 | 4.94079  | 3.42E-06 | 1.19E-05 | 3.918004 |
| IZUMO4    | -0.19295 | 0.874817 | 5.501978 | -4.94053 | 3.42E-06 | 1.19E-05 | 3.916999 |
| MAPK10    | -0.17109 | 0.88817  | 6.446264 | -4.94027 | 3.42E-06 | 1.19E-05 | 3.915966 |
| STMN1     | 0.196039 | 1.145549 | 6.358681 | 4.939485 | 3.43E-06 | 1.19E-05 | 3.9129   |
| THG1L     | 0.199614 | 1.148391 | 6.191319 | 4.939082 | 3.44E-06 | 1.19E-05 | 3.911326 |
| PLEKHM1   | 0.192643 | 1.142855 | 7.344176 | 4.937448 | 3.46E-06 | 1.20E-05 | 3.90494  |
| SEC23A    | 0.276865 | 1.211559 | 7.115824 | 4.936854 | 3.47E-06 | 1.20E-05 | 3.902619 |
| KRT75     | -0.17979 | 0.88283  | 5.01044  | -4.93543 | 3.49E-06 | 1.21E-05 | 3.897051 |
| CAMK2N1   | -0.21617 | 0.860845 | 9.735275 | -4.93508 | 3.50E-06 | 1.21E-05 | 3.895686 |
| CYP2A6    | -0.16176 | 0.893935 | 5.690879 | -4.93437 | 3.51E-06 | 1.21E-05 | 3.892923 |
| SOX21     | -0.20904 | 0.865111 | 4.90967  | -4.93415 | 3.51E-06 | 1.21E-05 | 3.892055 |

|          |          |          |          |          |          |          |          |
|----------|----------|----------|----------|----------|----------|----------|----------|
| TLR6     | -0.13559 | 0.910298 | 4.251429 | -4.93359 | 3.52E-06 | 1.22E-05 | 3.889862 |
| IRF8     | 0.526502 | 1.440433 | 6.832967 | 4.932718 | 3.53E-06 | 1.22E-05 | 3.886459 |
| FNDC8    | -0.18589 | 0.879107 | 4.763077 | -4.93259 | 3.53E-06 | 1.22E-05 | 3.885942 |
| RPL13A   | 0.15356  | 1.112311 | 13.66615 | 4.932167 | 3.54E-06 | 1.22E-05 | 3.884308 |
| PTGES3   | 0.182386 | 1.134759 | 10.98758 | 4.931712 | 3.54E-06 | 1.22E-05 | 3.882532 |
| MEAF6    | 0.215126 | 1.160805 | 6.727033 | 4.931371 | 3.55E-06 | 1.23E-05 | 3.881199 |
| ADAM15   | -0.17343 | 0.886735 | 6.08011  | -4.92983 | 3.57E-06 | 1.23E-05 | 3.875163 |
| PRAMEF12 | -0.19031 | 0.876415 | 4.701758 | -4.9244  | 3.65E-06 | 1.26E-05 | 3.853977 |
| MC4R     | -0.14046 | 0.907231 | 4.27989  | -4.92419 | 3.65E-06 | 1.26E-05 | 3.853181 |
| FUT1     | -0.17474 | 0.885925 | 5.18011  | -4.92418 | 3.65E-06 | 1.26E-05 | 3.853117 |
| ADAM11   | -0.20113 | 0.869869 | 5.51967  | -4.92272 | 3.68E-06 | 1.27E-05 | 3.847416 |
| CCNA2    | 0.288367 | 1.221257 | 4.419121 | 4.922487 | 3.68E-06 | 1.27E-05 | 3.846524 |
| NGLY1    | 0.15101  | 1.110346 | 8.17011  | 4.920417 | 3.71E-06 | 1.28E-05 | 3.83845  |
| DHX9     | 0.187643 | 1.138901 | 6.226703 | 4.920317 | 3.71E-06 | 1.28E-05 | 3.838058 |
| EGR3     | -0.47874 | 0.717605 | 4.42     | -4.9198  | 3.72E-06 | 1.28E-05 | 3.836029 |
| PSG11    | -0.21491 | 0.861598 | 4.682637 | -4.91958 | 3.72E-06 | 1.28E-05 | 3.835195 |
| ABHD11   | 0.239034 | 1.180202 | 7.074725 | 4.919291 | 3.73E-06 | 1.28E-05 | 3.834058 |
| GJA8     | -0.19346 | 0.874504 | 5.508462 | -4.9186  | 3.74E-06 | 1.28E-05 | 3.831344 |
| GJA3     | -0.17777 | 0.88407  | 4.782527 | -4.91725 | 3.76E-06 | 1.29E-05 | 3.826086 |
| COL15A1  | 0.55615  | 1.47034  | 5.351758 | 4.915988 | 3.78E-06 | 1.30E-05 | 3.82118  |
| EPB41L2  | 0.24157  | 1.182279 | 6.10011  | 4.915277 | 3.79E-06 | 1.30E-05 | 3.818407 |
| GYPB     | -0.16385 | 0.89264  | 3.835714 | -4.91389 | 3.81E-06 | 1.31E-05 | 3.813014 |
| RABGGTB  | -0.25157 | 0.839982 | 8.094945 | -4.91377 | 3.81E-06 | 1.31E-05 | 3.81253  |
| CLDN9    | -0.18259 | 0.88112  | 5.063187 | -4.91317 | 3.82E-06 | 1.31E-05 | 3.810192 |
| R3HDM1   | 0.168976 | 1.12426  | 7.607473 | 4.912959 | 3.82E-06 | 1.31E-05 | 3.809376 |
| WDR11    | 0.260411 | 1.19782  | 6.997253 | 4.910599 | 3.86E-06 | 1.32E-05 | 3.800178 |
| PREPL    | 0.184077 | 1.13609  | 8.114505 | 4.910556 | 3.86E-06 | 1.32E-05 | 3.800011 |
| KCNE2    | -0.16751 | 0.890377 | 5.479121 | -4.91051 | 3.86E-06 | 1.32E-05 | 3.799818 |
| BMP5     | -0.25547 | 0.837715 | 5.147582 | -4.9102  | 3.87E-06 | 1.32E-05 | 3.798641 |
| NDUFA2   | -0.13235 | 0.912346 | 9.728901 | -4.90894 | 3.89E-06 | 1.33E-05 | 3.793702 |
| SLC16A7  | -0.37571 | 0.770729 | 5.777473 | -4.90721 | 3.91E-06 | 1.34E-05 | 3.78698  |
| FUT7     | -0.14978 | 0.901386 | 4.495714 | -4.90715 | 3.92E-06 | 1.34E-05 | 3.786741 |
| TBC1D10B | -0.16427 | 0.89238  | 6.826593 | -4.90626 | 3.93E-06 | 1.34E-05 | 3.783285 |
| RHD      | -0.1807  | 0.882275 | 4.909121 | -4.90598 | 3.93E-06 | 1.34E-05 | 3.78218  |
| POLE2    | 0.301459 | 1.23239  | 4.964725 | 4.904352 | 3.96E-06 | 1.35E-05 | 3.775854 |
| CINP     | 0.253589 | 1.19217  | 7.136923 | 4.903995 | 3.97E-06 | 1.35E-05 | 3.774465 |
| CDKN1B   | 0.295498 | 1.227308 | 8.093516 | 4.903867 | 3.97E-06 | 1.35E-05 | 3.773966 |
| MT4      | -0.4312  | 0.741643 | 9.622637 | -4.90371 | 3.97E-06 | 1.35E-05 | 3.773366 |
| NME5     | 0.2423   | 1.182877 | 8.743297 | 4.903428 | 3.97E-06 | 1.35E-05 | 3.772255 |
| TNK1     | -0.17924 | 0.88317  | 6.965714 | -4.90227 | 3.99E-06 | 1.36E-05 | 3.767761 |
| HAX1     | -0.16101 | 0.894396 | 9.094725 | -4.90072 | 4.02E-06 | 1.37E-05 | 3.761702 |
| CA1      | -0.19234 | 0.875186 | 5.86967  | -4.90061 | 4.02E-06 | 1.37E-05 | 3.761303 |
| CTGF     | -0.74868 | 0.595147 | 8.719121 | -4.90046 | 4.02E-06 | 1.37E-05 | 3.760709 |
| NETO2    | 0.221696 | 1.166103 | 4.265934 | 4.899957 | 4.03E-06 | 1.37E-05 | 3.758749 |
| MPC1     | -0.26604 | 0.8316   | 10.6367  | -4.89974 | 4.03E-06 | 1.37E-05 | 3.757912 |
| RWDD2A   | 0.181092 | 1.133742 | 5.738681 | 4.899174 | 4.04E-06 | 1.37E-05 | 3.755702 |
| GABRA2   | -0.23951 | 0.847032 | 4.143516 | -4.8982  | 4.06E-06 | 1.38E-05 | 3.751919 |



|          |          |          |          |          |          |          |          |
|----------|----------|----------|----------|----------|----------|----------|----------|
| ARHGEF1  | -0.18364 | 0.880477 | 6.525275 | -4.8976  | 4.07E-06 | 1.38E-05 | 3.749576 |
| ACAP1    | -0.19036 | 0.876389 | 5.70978  | -4.89645 | 4.09E-06 | 1.39E-05 | 3.74511  |
| SEMA7A   | -0.19162 | 0.875623 | 5.322418 | -4.89484 | 4.12E-06 | 1.40E-05 | 3.738829 |
| CNIH4    | 0.243879 | 1.184172 | 7.665165 | 4.894523 | 4.12E-06 | 1.40E-05 | 3.737615 |
| CDKN3    | 0.374324 | 1.296232 | 4.79967  | 4.8928   | 4.15E-06 | 1.41E-05 | 3.730914 |
| TRIM29   | -0.16906 | 0.889423 | 4.888791 | -4.89197 | 4.16E-06 | 1.41E-05 | 3.727694 |
| PPP1CB   | 0.187396 | 1.138707 | 8.165495 | 4.891576 | 4.17E-06 | 1.41E-05 | 3.726156 |
| SIL1     | 0.183271 | 1.135455 | 7.667802 | 4.891129 | 4.18E-06 | 1.41E-05 | 3.724421 |
| L2HGDH   | -0.25976 | 0.835228 | 5.562418 | -4.89003 | 4.20E-06 | 1.42E-05 | 3.720158 |
| RPLP2    | 0.269541 | 1.205424 | 11.44264 | 4.888744 | 4.22E-06 | 1.43E-05 | 3.715151 |
| CHAC1    | -0.24503 | 0.843796 | 5.702308 | -4.88774 | 4.24E-06 | 1.43E-05 | 3.711235 |
| ALG5     | 0.196386 | 1.145825 | 9.514505 | 4.887354 | 4.24E-06 | 1.43E-05 | 3.709752 |
| ZNF688   | -0.14964 | 0.901474 | 5.832088 | -4.88671 | 4.25E-06 | 1.44E-05 | 3.707249 |
| DENND5A  | 0.195087 | 1.144793 | 7.775385 | 4.885243 | 4.28E-06 | 1.44E-05 | 3.701553 |
| METAP2   | 0.160739 | 1.11786  | 6.432747 | 4.883207 | 4.31E-06 | 1.46E-05 | 3.693647 |
| MDK      | 0.256754 | 1.194787 | 5.580879 | 4.883133 | 4.31E-06 | 1.46E-05 | 3.693357 |
| ADAR     | 0.201217 | 1.149668 | 9.744286 | 4.882019 | 4.33E-06 | 1.46E-05 | 3.689031 |
| PUS7     | 0.240251 | 1.181198 | 6.37011  | 4.88184  | 4.34E-06 | 1.46E-05 | 3.688338 |
| SLC1A7   | -0.14117 | 0.906784 | 4.797582 | -4.87993 | 4.37E-06 | 1.47E-05 | 3.68094  |
| SNCAIP   | -0.1992  | 0.871032 | 4.807363 | -4.87676 | 4.43E-06 | 1.49E-05 | 3.668618 |
| ADGRB2   | -0.18005 | 0.88267  | 4.638571 | -4.87596 | 4.44E-06 | 1.50E-05 | 3.665503 |
| PTPRB    | -0.15825 | 0.896114 | 5.150659 | -4.87456 | 4.47E-06 | 1.50E-05 | 3.660076 |
| CACNA1I  | -0.15704 | 0.896864 | 5.005604 | -4.87422 | 4.47E-06 | 1.51E-05 | 3.658761 |
| AGMAT    | -0.36952 | 0.774039 | 11.41879 | -4.87278 | 4.50E-06 | 1.51E-05 | 3.653174 |
| PDIA2    | -0.17439 | 0.886141 | 4.946154 | -4.87274 | 4.50E-06 | 1.51E-05 | 3.653026 |
| MRPL15   | 0.197918 | 1.147042 | 9.314176 | 4.868447 | 4.58E-06 | 1.54E-05 | 3.636385 |
| THOC7    | 0.2093   | 1.156127 | 8.651978 | 4.868343 | 4.58E-06 | 1.54E-05 | 3.63598  |
| MYBL2    | -0.17698 | 0.884555 | 5.628571 | -4.86783 | 4.59E-06 | 1.54E-05 | 3.633986 |
| KHDRBS3  | 0.246338 | 1.186193 | 6.367033 | 4.867414 | 4.60E-06 | 1.54E-05 | 3.63238  |
| FOXH1    | -0.21518 | 0.861437 | 4.72033  | -4.86665 | 4.61E-06 | 1.55E-05 | 3.629413 |
| FUS      | 0.231662 | 1.174187 | 7.279341 | 4.865591 | 4.63E-06 | 1.55E-05 | 3.625318 |
| CHCHD3   | 0.202169 | 1.150427 | 7.687582 | 4.864669 | 4.65E-06 | 1.56E-05 | 3.621745 |
| TNR      | -0.16215 | 0.893689 | 4.482857 | -4.86242 | 4.69E-06 | 1.57E-05 | 3.613025 |
| FAM21A   | 0.288295 | 1.221196 | 9.615824 | 4.859364 | 4.75E-06 | 1.59E-05 | 3.6012   |
| KIR2DS4  | -0.1842  | 0.880135 | 5.01978  | -4.85932 | 4.75E-06 | 1.59E-05 | 3.60101  |
| PIWIL1   | -0.15531 | 0.89794  | 3.734286 | -4.85926 | 4.75E-06 | 1.59E-05 | 3.600814 |
| HTRA1    | -0.47034 | 0.721793 | 8.841978 | -4.85921 | 4.75E-06 | 1.59E-05 | 3.600602 |
| EBNA1BP2 | 0.172918 | 1.127336 | 7.596813 | 4.858796 | 4.76E-06 | 1.59E-05 | 3.598999 |
| TESK1    | -0.19802 | 0.871744 | 7.220989 | -4.85815 | 4.77E-06 | 1.60E-05 | 3.596504 |
| ACACB    | -0.23012 | 0.852566 | 6.930989 | -4.85781 | 4.78E-06 | 1.60E-05 | 3.59519  |
| ACKR2    | -0.16907 | 0.889417 | 5.298352 | -4.85763 | 4.78E-06 | 1.60E-05 | 3.594472 |
| PGAP3    | -0.14699 | 0.903133 | 7.392747 | -4.85588 | 4.82E-06 | 1.61E-05 | 3.587706 |
| BHLHB9   | 0.294464 | 1.226429 | 5.526484 | 4.853189 | 4.87E-06 | 1.63E-05 | 3.577302 |
| ARMC1    | 0.220734 | 1.165327 | 7.782198 | 4.853137 | 4.87E-06 | 1.63E-05 | 3.577101 |
| LIMS2    | -0.19175 | 0.875541 | 5.806264 | -4.85302 | 4.87E-06 | 1.63E-05 | 3.576635 |
| MEX3C    | 0.172242 | 1.126808 | 5.246044 | 4.852362 | 4.88E-06 | 1.63E-05 | 3.574102 |
| SLC1A2   | -0.1372  | 0.90928  | 4.568022 | -4.85228 | 4.89E-06 | 1.63E-05 | 3.573788 |

|          |          |          |          |          |          |          |          |
|----------|----------|----------|----------|----------|----------|----------|----------|
| LRRC2    | -0.22249 | 0.857083 | 4.077802 | -4.85078 | 4.92E-06 | 1.64E-05 | 3.567964 |
| UBA3     | 0.190778 | 1.141379 | 7.469341 | 4.850712 | 4.92E-06 | 1.64E-05 | 3.567718 |
| CCL17    | -0.18867 | 0.877416 | 4.946703 | -4.84903 | 4.95E-06 | 1.65E-05 | 3.561213 |
| BHLHE41  | 0.239937 | 1.180941 | 5.015824 | 4.846025 | 5.01E-06 | 1.67E-05 | 3.549596 |
| TEX10    | 0.154309 | 1.112889 | 6.67022  | 4.844553 | 5.04E-06 | 1.68E-05 | 3.543906 |
| SUPV3L1  | -0.15358 | 0.899017 | 7.172967 | -4.84422 | 5.05E-06 | 1.68E-05 | 3.542616 |
| NT5C2    | 0.189913 | 1.140695 | 6.88     | 4.843725 | 5.06E-06 | 1.68E-05 | 3.540706 |
| FDXR     | 0.259179 | 1.196797 | 5.451209 | 4.843236 | 5.07E-06 | 1.68E-05 | 3.538819 |
| GP9      | -0.16913 | 0.889379 | 5.825495 | -4.84294 | 5.07E-06 | 1.69E-05 | 3.537662 |
| CLCN7    | -0.14344 | 0.905355 | 7.114066 | -4.84284 | 5.07E-06 | 1.69E-05 | 3.537281 |
| SERPINI1 | 0.455135 | 1.370911 | 8.766154 | 4.841231 | 5.11E-06 | 1.70E-05 | 3.531071 |
| EBLN2    | -0.19416 | 0.874079 | 5.546593 | -4.83946 | 5.14E-06 | 1.71E-05 | 3.524222 |
| STAB2    | -0.20798 | 0.865748 | 4.738022 | -4.83908 | 5.15E-06 | 1.71E-05 | 3.522746 |
| NCAPG2   | 0.178222 | 1.131489 | 5.298132 | 4.838788 | 5.16E-06 | 1.71E-05 | 3.521637 |
| PLXNB3   | -0.18234 | 0.881271 | 5.564396 | -4.83865 | 5.16E-06 | 1.71E-05 | 3.521109 |
| BHMT     | -0.48127 | 0.716349 | 12.41505 | -4.83817 | 5.17E-06 | 1.71E-05 | 3.519236 |
| HMGB2    | 0.369657 | 1.292046 | 7.907363 | 4.837957 | 5.18E-06 | 1.71E-05 | 3.518427 |
| MAML1    | 0.164899 | 1.121087 | 6.801978 | 4.835779 | 5.22E-06 | 1.73E-05 | 3.510015 |
| TM2D3    | 0.173947 | 1.128141 | 8.703626 | 4.835032 | 5.24E-06 | 1.73E-05 | 3.507132 |
| OR7C2    | -0.18784 | 0.877919 | 5.404286 | -4.83421 | 5.25E-06 | 1.74E-05 | 3.503965 |
| CAPNS1   | 0.180343 | 1.133153 | 10.25462 | 4.834071 | 5.26E-06 | 1.74E-05 | 3.503423 |
| BTG2     | -0.54086 | 0.687359 | 7.203626 | -4.83235 | 5.29E-06 | 1.75E-05 | 3.496794 |
| PAH      | -0.58713 | 0.665668 | 11.90901 | -4.83026 | 5.34E-06 | 1.76E-05 | 3.488702 |
| PBX2     | -0.16516 | 0.891827 | 5.605934 | -4.82933 | 5.36E-06 | 1.77E-05 | 3.485124 |
| CEACAM4  | -0.1507  | 0.900816 | 5.924176 | -4.82808 | 5.38E-06 | 1.78E-05 | 3.480322 |
| AQP5     | -0.1865  | 0.878733 | 5.255165 | -4.82789 | 5.39E-06 | 1.78E-05 | 3.47957  |
| ACYP2    | 0.220464 | 1.165108 | 6.52989  | 4.827491 | 5.40E-06 | 1.78E-05 | 3.478035 |
| HDHD3    | -0.25461 | 0.838212 | 8.056484 | -4.8272  | 5.40E-06 | 1.78E-05 | 3.476904 |
| ASCC1    | 0.195546 | 1.145157 | 6.736264 | 4.826425 | 5.42E-06 | 1.79E-05 | 3.473925 |
| MYCL     | -0.20181 | 0.869461 | 5.658901 | -4.82602 | 5.43E-06 | 1.79E-05 | 3.472346 |
| MAT1A    | -0.18774 | 0.877981 | 5.738901 | -4.82593 | 5.43E-06 | 1.79E-05 | 3.472005 |
| SMYD5    | -0.17924 | 0.88317  | 6.645714 | -4.82522 | 5.45E-06 | 1.79E-05 | 3.469296 |
| OTOR     | -0.2006  | 0.870186 | 4.543626 | -4.82399 | 5.47E-06 | 1.80E-05 | 3.464546 |
| CNTN2    | -0.14575 | 0.90391  | 4.939231 | -4.82394 | 5.48E-06 | 1.80E-05 | 3.464337 |
| LIN37    | 0.17714  | 1.13064  | 5.198901 | 4.823644 | 5.48E-06 | 1.80E-05 | 3.463203 |
| ACVR2B-A | -0.20493 | 0.867579 | 4.316703 | -4.82304 | 5.49E-06 | 1.81E-05 | 3.460874 |
| ATF1     | 0.204295 | 1.152123 | 6.784286 | 4.819031 | 5.58E-06 | 1.83E-05 | 3.445425 |
| PAMR1    | -0.29723 | 0.813815 | 5.407802 | -4.81871 | 5.59E-06 | 1.84E-05 | 3.444181 |
| ACTR1A   | 0.185594 | 1.137285 | 7.563516 | 4.818653 | 5.59E-06 | 1.84E-05 | 3.44397  |
| PICALM   | 0.191923 | 1.142285 | 8.331429 | 4.817345 | 5.62E-06 | 1.84E-05 | 3.438931 |
| GLUL     | 0.279575 | 1.213837 | 8.319121 | 4.81631  | 5.65E-06 | 1.85E-05 | 3.434946 |
| RHOB     | -0.50842 | 0.702994 | 9.49989  | -4.81615 | 5.65E-06 | 1.85E-05 | 3.434344 |
| CYP4F12  | -0.31466 | 0.804042 | 6.624835 | -4.81491 | 5.68E-06 | 1.86E-05 | 3.429543 |
| WWP1     | 0.237787 | 1.179183 | 7.228022 | 4.81402  | 5.70E-06 | 1.87E-05 | 3.426128 |
| LPP      | 0.226662 | 1.170124 | 7.231868 | 4.81216  | 5.74E-06 | 1.88E-05 | 3.418967 |
| CPZ      | -0.18003 | 0.882685 | 5.32967  | -4.81148 | 5.76E-06 | 1.88E-05 | 3.416354 |
| ADGRF5   | -0.54858 | 0.683691 | 8.622418 | -4.811   | 5.77E-06 | 1.89E-05 | 3.414519 |

|           |          |          |          |          |          |          |          |
|-----------|----------|----------|----------|----------|----------|----------|----------|
| CASP3     | 0.27914  | 1.213471 | 6.299341 | 4.810856 | 5.77E-06 | 1.89E-05 | 3.413948 |
| BRD3      | 0.228855 | 1.171905 | 7.631648 | 4.8106   | 5.78E-06 | 1.89E-05 | 3.412963 |
| CTSF      | -0.24296 | 0.845012 | 8.106813 | -4.80968 | 5.80E-06 | 1.90E-05 | 3.409419 |
| IFI44     | 0.762783 | 1.69676  | 5.582418 | 4.809373 | 5.80E-06 | 1.90E-05 | 3.408239 |
| COL5A3    | -0.1391  | 0.908088 | 5.551868 | -4.80785 | 5.84E-06 | 1.91E-05 | 3.402382 |
| KCNJ6     | -0.16243 | 0.893522 | 4.980549 | -4.80769 | 5.84E-06 | 1.91E-05 | 3.401765 |
| RNASE6    | 0.607043 | 1.523135 | 5.867143 | 4.804788 | 5.91E-06 | 1.93E-05 | 3.390602 |
| GPSM3     | -0.17466 | 0.885975 | 6.153846 | -4.80422 | 5.93E-06 | 1.93E-05 | 3.388433 |
| GRPEL1    | -0.19771 | 0.87193  | 8.805055 | -4.8041  | 5.93E-06 | 1.93E-05 | 3.387955 |
| TNNC2     | -0.21517 | 0.861445 | 5.390989 | -4.80363 | 5.94E-06 | 1.94E-05 | 3.386133 |
| EPHB3     | -0.15519 | 0.898015 | 5.61978  | -4.8036  | 5.94E-06 | 1.94E-05 | 3.386046 |
| NT5M      | -0.17918 | 0.883203 | 5.108132 | -4.80332 | 5.95E-06 | 1.94E-05 | 3.384943 |
| NFKBIE    | 0.367662 | 1.29026  | 6.056593 | 4.802744 | 5.96E-06 | 1.94E-05 | 3.382742 |
| ARMC6     | -0.15445 | 0.898475 | 6.183407 | -4.80177 | 5.98E-06 | 1.95E-05 | 3.37899  |
| SEMA6D    | -0.28405 | 0.82128  | 5.157143 | -4.7986  | 6.06E-06 | 1.97E-05 | 3.36683  |
| GM2A      | 0.182174 | 1.134592 | 6.807912 | 4.797749 | 6.08E-06 | 1.98E-05 | 3.363543 |
| CXorf36   | -0.16528 | 0.891758 | 5.530879 | -4.79758 | 6.08E-06 | 1.98E-05 | 3.362893 |
| BMP3      | -0.15265 | 0.899598 | 4.375385 | -4.79677 | 6.10E-06 | 1.98E-05 | 3.359765 |
| NYX       | -0.15499 | 0.898141 | 5.059011 | -4.79575 | 6.13E-06 | 1.99E-05 | 3.355881 |
| ANKRD2    | 0.440377 | 1.356959 | 5.594725 | 4.795554 | 6.13E-06 | 1.99E-05 | 3.355112 |
| CUBN      | -0.4941  | 0.710004 | 11.3811  | -4.79535 | 6.14E-06 | 1.99E-05 | 3.354323 |
| STUB1     | -0.15327 | 0.899213 | 9.477253 | -4.79386 | 6.18E-06 | 2.00E-05 | 3.348599 |
| TLE1      | 0.196754 | 1.146116 | 5.971209 | 4.793632 | 6.18E-06 | 2.01E-05 | 3.347728 |
| FAM131A   | -0.20081 | 0.870064 | 5.964396 | -4.79208 | 6.22E-06 | 2.02E-05 | 3.341784 |
| PSIP1     | 0.23771  | 1.17912  | 7.174505 | 4.791906 | 6.22E-06 | 2.02E-05 | 3.3411   |
| PPIL6     | -0.13963 | 0.907753 | 4.067692 | -4.79168 | 6.23E-06 | 2.02E-05 | 3.340239 |
| PDZD2     | -0.43903 | 0.737628 | 6.486374 | -4.79058 | 6.26E-06 | 2.03E-05 | 3.335992 |
| USP46     | 0.173918 | 1.128118 | 5.532308 | 4.789268 | 6.29E-06 | 2.04E-05 | 3.330975 |
| RUNX1-IT1 | -0.15974 | 0.895184 | 5.192527 | -4.78839 | 6.31E-06 | 2.04E-05 | 3.327613 |
| USO1      | 0.179623 | 1.132588 | 8.311868 | 4.788216 | 6.32E-06 | 2.04E-05 | 3.326937 |
| TMEM248   | 0.149841 | 1.109447 | 8.536923 | 4.788215 | 6.32E-06 | 2.04E-05 | 3.326934 |
| LPAL2     | -0.23747 | 0.848232 | 4.716484 | -4.7873  | 6.34E-06 | 2.05E-05 | 3.323409 |
| RAC2      | 0.397169 | 1.316921 | 6.479011 | 4.786288 | 6.37E-06 | 2.06E-05 | 3.319539 |
| CWF19L1   | -0.15482 | 0.898244 | 6.476484 | -4.78482 | 6.40E-06 | 2.07E-05 | 3.31389  |
| PRG2      | -0.18056 | 0.882363 | 4.585714 | -4.78364 | 6.43E-06 | 2.08E-05 | 3.309392 |
| FABP2     | -0.1756  | 0.885397 | 4.670989 | -4.78261 | 6.46E-06 | 2.09E-05 | 3.305422 |
| AGRN      | 0.187246 | 1.138588 | 6.788681 | 4.782527 | 6.46E-06 | 2.09E-05 | 3.305112 |
| PYY       | -0.20902 | 0.865125 | 5.870769 | -4.78106 | 6.50E-06 | 2.10E-05 | 3.299473 |
| IQCA1     | 0.232087 | 1.174533 | 5.308681 | 4.780712 | 6.51E-06 | 2.10E-05 | 3.298151 |
| MYO5C     | 0.352333 | 1.276624 | 7.699231 | 4.779981 | 6.53E-06 | 2.10E-05 | 3.295349 |
| CACNG3    | -0.18733 | 0.87823  | 4.857582 | -4.77983 | 6.53E-06 | 2.10E-05 | 3.294754 |
| DRD2      | -0.14898 | 0.90189  | 5.412418 | -4.7781  | 6.58E-06 | 2.12E-05 | 3.288147 |
| C1orf115  | -0.22362 | 0.856412 | 9.146374 | -4.77636 | 6.62E-06 | 2.13E-05 | 3.281459 |
| LAMP1     | 0.156324 | 1.114444 | 10.78187 | 4.775957 | 6.63E-06 | 2.13E-05 | 3.279924 |
| PLEKHG6   | -0.16882 | 0.889572 | 4.69978  | -4.77307 | 6.71E-06 | 2.16E-05 | 3.268853 |
| BMX       | -0.17086 | 0.88831  | 4.266593 | -4.77298 | 6.71E-06 | 2.16E-05 | 3.268531 |
| DHRS7B    | 0.215072 | 1.160762 | 8.024615 | 4.772601 | 6.72E-06 | 2.16E-05 | 3.267069 |

|           |          |          |          |          |          |          |          |
|-----------|----------|----------|----------|----------|----------|----------|----------|
| CCNC      | 0.161705 | 1.118609 | 9.786703 | 4.77196  | 6.74E-06 | 2.17E-05 | 3.264613 |
| AIMP1     | 0.150222 | 1.10974  | 7.974286 | 4.771888 | 6.74E-06 | 2.17E-05 | 3.264337 |
| TMEM184   | 0.179609 | 1.132577 | 7.861209 | 4.771616 | 6.75E-06 | 2.17E-05 | 3.263296 |
| LSM8      | 0.177884 | 1.131224 | 6.612747 | 4.771567 | 6.75E-06 | 2.17E-05 | 3.263106 |
| RIN1      | -0.1899  | 0.876667 | 6.110659 | -4.76992 | 6.80E-06 | 2.18E-05 | 3.256811 |
| FOSL1     | -0.3409  | 0.789547 | 4.090769 | -4.7699  | 6.80E-06 | 2.18E-05 | 3.256714 |
| GPR153    | -0.19358 | 0.874433 | 6.923187 | -4.76937 | 6.81E-06 | 2.18E-05 | 3.254693 |
| HSPA6     | -0.75286 | 0.593426 | 6.409011 | -4.76572 | 6.91E-06 | 2.21E-05 | 3.240741 |
| HERC1     | -0.22743 | 0.854155 | 6.483187 | -4.76561 | 6.91E-06 | 2.21E-05 | 3.240293 |
| FZD5      | -0.22919 | 0.853112 | 6.982967 | -4.76509 | 6.93E-06 | 2.22E-05 | 3.2383   |
| TRPM2     | -0.20012 | 0.870478 | 5.755604 | -4.76442 | 6.95E-06 | 2.22E-05 | 3.235764 |
| TSHZ2     | -0.13949 | 0.907841 | 5.344066 | -4.76433 | 6.95E-06 | 2.22E-05 | 3.235409 |
| PTPRO     | -0.83802 | 0.559411 | 6.114725 | -4.76409 | 6.95E-06 | 2.22E-05 | 3.2345   |
| KPNA4     | 0.165623 | 1.12165  | 6.004945 | 4.76103  | 7.04E-06 | 2.25E-05 | 3.22278  |
| GAPDHS    | -0.15953 | 0.895319 | 3.992418 | -4.761   | 7.04E-06 | 2.25E-05 | 3.222672 |
| C12orf49  | 0.203449 | 1.151448 | 7.905824 | 4.760115 | 7.07E-06 | 2.26E-05 | 3.219281 |
| TDRD1     | -0.15614 | 0.897426 | 3.936703 | -4.75976 | 7.08E-06 | 2.26E-05 | 3.21794  |
| ZNF189    | 0.25558  | 1.193815 | 7.667473 | 4.759661 | 7.08E-06 | 2.26E-05 | 3.217543 |
| TEX11     | -0.17608 | 0.885106 | 4.849451 | -4.75877 | 7.10E-06 | 2.27E-05 | 3.214152 |
| TBX21     | -0.16596 | 0.891334 | 4.97967  | -4.75754 | 7.14E-06 | 2.28E-05 | 3.209431 |
| DDX25     | -0.25233 | 0.83954  | 5.54044  | -4.75523 | 7.20E-06 | 2.30E-05 | 3.200597 |
| MELK      | 0.346681 | 1.271632 | 4.892088 | 4.755218 | 7.21E-06 | 2.30E-05 | 3.200559 |
| WDR13     | -0.18104 | 0.882065 | 8.873516 | -4.75499 | 7.21E-06 | 2.30E-05 | 3.199697 |
| APOC1     | 0.890527 | 1.853853 | 8.174066 | 4.753991 | 7.24E-06 | 2.31E-05 | 3.19587  |
| PPA1      | 0.257077 | 1.195055 | 10.8156  | 4.752504 | 7.28E-06 | 2.32E-05 | 3.190188 |
| C11orf73  | 0.202333 | 1.150558 | 4.445055 | 4.751488 | 7.31E-06 | 2.33E-05 | 3.186308 |
| SLC6A20   | 0.371048 | 1.293292 | 4.540659 | 4.751052 | 7.33E-06 | 2.33E-05 | 3.184641 |
| CAPN10    | -0.17024 | 0.888694 | 6.204945 | -4.74923 | 7.38E-06 | 2.35E-05 | 3.177667 |
| LINC00472 | -0.30485 | 0.809529 | 4.981209 | -4.74813 | 7.41E-06 | 2.36E-05 | 3.173499 |
| FNBP1L    | 0.329386 | 1.256479 | 8.315275 | 4.747842 | 7.42E-06 | 2.36E-05 | 3.17238  |
| PPP1R1A   | 0.684816 | 1.607497 | 8.065385 | 4.746712 | 7.45E-06 | 2.37E-05 | 3.168066 |
| SPTLC1    | 0.156918 | 1.114903 | 7.998901 | 4.74456  | 7.52E-06 | 2.39E-05 | 3.159853 |
| TIPRL     | 0.197502 | 1.146711 | 6.655275 | 4.744202 | 7.53E-06 | 2.39E-05 | 3.158488 |
| SCN10A    | -0.16949 | 0.889158 | 4.979231 | -4.74356 | 7.55E-06 | 2.40E-05 | 3.156035 |
| SERINC3   | 0.164256 | 1.120588 | 8.622747 | 4.742674 | 7.57E-06 | 2.40E-05 | 3.152656 |
| AASS      | -0.28803 | 0.81902  | 6.186264 | -4.7423  | 7.59E-06 | 2.41E-05 | 3.151229 |
| RBX1      | 0.162981 | 1.119598 | 9.694725 | 4.74128  | 7.62E-06 | 2.41E-05 | 3.147337 |
| SNRNP70   | 0.246251 | 1.186121 | 7.553077 | 4.740126 | 7.65E-06 | 2.42E-05 | 3.142935 |
| SLC26A1   | -0.15464 | 0.898355 | 4.584615 | -4.73884 | 7.69E-06 | 2.44E-05 | 3.138023 |
| AGO1      | -0.18999 | 0.876615 | 6.726703 | -4.73608 | 7.77E-06 | 2.46E-05 | 3.127506 |
| CDC7      | 0.239333 | 1.180447 | 4.418352 | 4.735665 | 7.79E-06 | 2.46E-05 | 3.125924 |
| PGD       | 0.255589 | 1.193823 | 7.717912 | 4.734775 | 7.82E-06 | 2.47E-05 | 3.122531 |
| CRYBB2    | -0.19937 | 0.870933 | 5.15989  | -4.73428 | 7.83E-06 | 2.48E-05 | 3.120628 |
| TMEM131   | 0.192715 | 1.142913 | 6.417473 | 4.733754 | 7.85E-06 | 2.48E-05 | 3.118638 |
| LY6G6C    | -0.17878 | 0.883448 | 5.246374 | -4.73153 | 7.92E-06 | 2.50E-05 | 3.110156 |
| SQSTM1    | 0.221208 | 1.165709 | 7.563736 | 4.731049 | 7.93E-06 | 2.51E-05 | 3.108332 |
| GLRX2     | 0.270184 | 1.205961 | 7.101868 | 4.727819 | 8.03E-06 | 2.54E-05 | 3.096027 |

|          |          |          |          |          |          |          |          |
|----------|----------|----------|----------|----------|----------|----------|----------|
| KIAA0040 | -0.16507 | 0.891887 | 5.71033  | -4.72759 | 8.04E-06 | 2.54E-05 | 3.095139 |
| PRPF38B  | 0.192575 | 1.142802 | 6.171099 | 4.726144 | 8.09E-06 | 2.55E-05 | 3.089648 |
| GBP1     | 0.501575 | 1.415758 | 6.318901 | 4.725638 | 8.10E-06 | 2.56E-05 | 3.08772  |
| KCNH4    | -0.1782  | 0.883803 | 4.662747 | -4.72398 | 8.16E-06 | 2.57E-05 | 3.081428 |
| EPHA7    | 0.302937 | 1.233653 | 5.151978 | 4.722453 | 8.21E-06 | 2.59E-05 | 3.075598 |
| UBR4     | 0.413797 | 1.332187 | 9.115495 | 4.722276 | 8.21E-06 | 2.59E-05 | 3.074922 |
| LGI2     | -0.17904 | 0.883288 | 6.294505 | -4.72066 | 8.27E-06 | 2.60E-05 | 3.068775 |
| HSPA14   | 0.20457  | 1.152343 | 6.686813 | 4.719781 | 8.29E-06 | 2.61E-05 | 3.065429 |
| RHOQ     | 0.19485  | 1.144605 | 6.454615 | 4.717981 | 8.35E-06 | 2.63E-05 | 3.058583 |
| KLHL20   | -0.18137 | 0.881864 | 5.928571 | -4.71783 | 8.36E-06 | 2.63E-05 | 3.058    |
| MLF2     | -0.18218 | 0.881368 | 8.461648 | -4.71683 | 8.39E-06 | 2.64E-05 | 3.054221 |
| ADRA2B   | -0.19971 | 0.870725 | 5.424286 | -4.71539 | 8.44E-06 | 2.65E-05 | 3.048723 |
| GTF2I    | 0.245541 | 1.185537 | 5.610769 | 4.715155 | 8.45E-06 | 2.65E-05 | 3.047834 |
| WISP2    | -0.14566 | 0.903968 | 4.493407 | -4.71439 | 8.47E-06 | 2.66E-05 | 3.044927 |
| PMM2     | 0.244058 | 1.184319 | 6.073297 | 4.714034 | 8.49E-06 | 2.66E-05 | 3.043573 |
| MUC5B    | -0.14914 | 0.901785 | 4.654725 | -4.71374 | 8.50E-06 | 2.67E-05 | 3.042462 |
| FABP1    | -0.57871 | 0.669564 | 11.14209 | -4.70791 | 8.69E-06 | 2.73E-05 | 3.020294 |
| GIN1     | 0.193483 | 1.143521 | 6.292418 | 4.707143 | 8.72E-06 | 2.74E-05 | 3.017388 |
| PDCD6    | 0.175483 | 1.129343 | 8.763516 | 4.707035 | 8.72E-06 | 2.74E-05 | 3.016975 |
| MST1R    | -0.17946 | 0.883034 | 5.225604 | -4.70606 | 8.76E-06 | 2.75E-05 | 3.013269 |
| PSTPIP2  | 0.248812 | 1.188228 | 4.65956  | 4.70582  | 8.77E-06 | 2.75E-05 | 3.012363 |
| KRT32    | -0.15715 | 0.896792 | 4.91033  | -4.70436 | 8.82E-06 | 2.76E-05 | 3.006818 |
| SCGB1D2  | 0.712971 | 1.639176 | 5.676264 | 4.699395 | 8.99E-06 | 2.82E-05 | 2.987974 |
| GP2      | -0.2597  | 0.835264 | 5.045275 | -4.69583 | 9.12E-06 | 2.85E-05 | 2.97444  |
| GNAT1    | -0.14098 | 0.906906 | 4.546374 | -4.69544 | 9.13E-06 | 2.86E-05 | 2.972965 |
| MUC6     | -0.17171 | 0.887787 | 4.817912 | -4.69512 | 9.14E-06 | 2.86E-05 | 2.971756 |
| RAD50    | 0.20957  | 1.156344 | 6.024286 | 4.694267 | 9.18E-06 | 2.87E-05 | 2.96852  |
| TERF2IP  | -0.16052 | 0.894704 | 8.697363 | -4.69325 | 9.21E-06 | 2.88E-05 | 2.964673 |
| RAP2C    | 0.212937 | 1.159045 | 6.967473 | 4.69292  | 9.22E-06 | 2.88E-05 | 2.963413 |
| PPARG    | 0.186039 | 1.137636 | 5.823736 | 4.692161 | 9.25E-06 | 2.89E-05 | 2.960534 |
| TM9SF3   | 0.203435 | 1.151436 | 9.025165 | 4.691919 | 9.26E-06 | 2.89E-05 | 2.959619 |
| PYGM     | -0.19544 | 0.873307 | 5.528571 | -4.69153 | 9.28E-06 | 2.89E-05 | 2.958157 |
| SSBP3    | -0.2849  | 0.820799 | 6.918681 | -4.69151 | 9.28E-06 | 2.89E-05 | 2.958052 |
| C16orf71 | -0.15664 | 0.89711  | 4.663626 | -4.69134 | 9.28E-06 | 2.89E-05 | 2.957439 |
| BMS1     | 0.155836 | 1.114067 | 6.85967  | 4.690545 | 9.31E-06 | 2.90E-05 | 2.954409 |
| ANGPTL2  | -0.21926 | 0.859005 | 5.294835 | -4.68746 | 9.43E-06 | 2.94E-05 | 2.942737 |
| BST1     | -0.35754 | 0.780496 | 6.034066 | -4.68574 | 9.49E-06 | 2.96E-05 | 2.936215 |
| CHRNA4   | -0.14437 | 0.904776 | 3.772088 | -4.68567 | 9.49E-06 | 2.96E-05 | 2.935927 |
| MYOD1    | -0.14788 | 0.902576 | 5.382308 | -4.68446 | 9.54E-06 | 2.97E-05 | 2.931359 |
| FDX1     | -0.21704 | 0.860327 | 9.185714 | -4.6831  | 9.59E-06 | 2.98E-05 | 2.926193 |
| GREB1L   | -0.18904 | 0.87719  | 5.23978  | -4.68227 | 9.62E-06 | 2.99E-05 | 2.923055 |
| UBE2M    | -0.2141  | 0.862086 | 7.63978  | -4.68202 | 9.63E-06 | 2.99E-05 | 2.922103 |
| ITGA6    | 0.243831 | 1.184133 | 8.492967 | 4.681545 | 9.65E-06 | 3.00E-05 | 2.920319 |
| FAM111A  | 0.193024 | 1.143157 | 7.491538 | 4.680611 | 9.68E-06 | 3.01E-05 | 2.916782 |
| KIF1A    | -0.14538 | 0.90414  | 4.635934 | -4.6799  | 9.71E-06 | 3.02E-05 | 2.914093 |
| CCL22    | -0.16108 | 0.894357 | 5.591868 | -4.67942 | 9.73E-06 | 3.02E-05 | 2.912294 |
| ATAD5    | -0.17916 | 0.883217 | 5.509231 | -4.67938 | 9.73E-06 | 3.02E-05 | 2.912119 |

|          |          |          |          |          |          |          |          |
|----------|----------|----------|----------|----------|----------|----------|----------|
| ACAT1    | -0.21231 | 0.863155 | 11.2411  | -4.67927 | 9.74E-06 | 3.02E-05 | 2.911703 |
| OSBPL10  | 0.251821 | 1.190709 | 7.146484 | 4.679061 | 9.74E-06 | 3.02E-05 | 2.910915 |
| XPO7     | -0.21637 | 0.860727 | 7.726264 | -4.6745  | 9.92E-06 | 3.08E-05 | 2.89368  |
| WNT6     | -0.15911 | 0.89558  | 4.521538 | -4.67424 | 9.93E-06 | 3.08E-05 | 2.892676 |
| SV2A     | -0.23147 | 0.851767 | 5.259451 | -4.67396 | 9.94E-06 | 3.08E-05 | 2.891632 |
| ARFIP2   | -0.16989 | 0.888908 | 8.290769 | -4.67169 | 1.00E-05 | 3.11E-05 | 2.88302  |
| RAB5A    | 0.134783 | 1.097927 | 9.411868 | 4.666272 | 1.02E-05 | 3.17E-05 | 2.862557 |
| AKR1C2   | 0.70886  | 1.634512 | 6.819231 | 4.66568  | 1.03E-05 | 3.18E-05 | 2.860323 |
| TCEA2    | -0.2126  | 0.862978 | 6.547692 | -4.66545 | 1.03E-05 | 3.18E-05 | 2.859452 |
| SNRPD1   | 0.171841 | 1.126495 | 7.337802 | 4.665042 | 1.03E-05 | 3.18E-05 | 2.857913 |
| GPN2     | 0.183899 | 1.135949 | 6.236374 | 4.664592 | 1.03E-05 | 3.19E-05 | 2.856214 |
| SH2B3    | 0.31215  | 1.241556 | 7.021099 | 4.663142 | 1.04E-05 | 3.21E-05 | 2.850737 |
| ADO      | 0.152357 | 1.111384 | 7.191429 | 4.662407 | 1.04E-05 | 3.21E-05 | 2.847958 |
| KLK5     | -0.17409 | 0.886325 | 4.99978  | -4.66166 | 1.04E-05 | 3.22E-05 | 2.845153 |
| GLA      | 0.227884 | 1.171116 | 8.277473 | 4.661562 | 1.04E-05 | 3.22E-05 | 2.84477  |
| APLNR    | -0.23513 | 0.849611 | 6.163077 | -4.66133 | 1.04E-05 | 3.22E-05 | 2.843891 |
| STC2     | -0.19361 | 0.874413 | 5.781648 | -4.66122 | 1.05E-05 | 3.22E-05 | 2.843463 |
| TIMM17B  | -0.16553 | 0.891603 | 7.839451 | -4.6598  | 1.05E-05 | 3.24E-05 | 2.838104 |
| GRINA    | -0.21912 | 0.859089 | 7.031209 | -4.65679 | 1.06E-05 | 3.28E-05 | 2.826753 |
| CCDC33   | -0.15419 | 0.898638 | 4.575275 | -4.65592 | 1.07E-05 | 3.29E-05 | 2.823462 |
| PCNT     | -0.16766 | 0.890284 | 6.722308 | -4.65562 | 1.07E-05 | 3.29E-05 | 2.822362 |
| PAOX     | -0.18489 | 0.879714 | 6.478352 | -4.65562 | 1.07E-05 | 3.29E-05 | 2.822329 |
| TRIP6    | 0.258285 | 1.196056 | 8.450549 | 4.655611 | 1.07E-05 | 3.29E-05 | 2.822311 |
| SPHK2    | -0.20131 | 0.869761 | 7.141538 | -4.6556  | 1.07E-05 | 3.29E-05 | 2.822273 |
| TAOK3    | 0.198116 | 1.147199 | 7.173187 | 4.655286 | 1.07E-05 | 3.29E-05 | 2.821084 |
| C1orf116 | 0.19257  | 1.142798 | 5.260879 | 4.654946 | 1.07E-05 | 3.29E-05 | 2.819799 |
| SEC24D   | 0.199377 | 1.148202 | 4.140549 | 4.654877 | 1.07E-05 | 3.29E-05 | 2.819541 |
| RFC5     | 0.16757  | 1.123165 | 5.463516 | 4.653449 | 1.08E-05 | 3.31E-05 | 2.814155 |
| DPF2     | 0.16457  | 1.120832 | 7.467033 | 4.653089 | 1.08E-05 | 3.31E-05 | 2.812795 |
| ZNF84    | 0.185763 | 1.137419 | 5.531209 | 4.650198 | 1.09E-05 | 3.35E-05 | 2.801896 |
| SNAI1    | -0.16773 | 0.89024  | 5.409011 | -4.64999 | 1.09E-05 | 3.35E-05 | 2.801127 |
| CX3CR1   | 0.666628 | 1.587359 | 5.747912 | 4.647778 | 1.10E-05 | 3.38E-05 | 2.792773 |
| CYB5R4   | 0.242111 | 1.182722 | 6.684725 | 4.647482 | 1.10E-05 | 3.38E-05 | 2.791659 |
| TIGAR    | 0.370222 | 1.292552 | 5.783077 | 4.647443 | 1.10E-05 | 3.38E-05 | 2.79151  |
| ELAC2    | 0.172879 | 1.127306 | 7.035055 | 4.646638 | 1.11E-05 | 3.39E-05 | 2.788478 |
| SSX3     | -0.19627 | 0.872807 | 5.020989 | -4.64654 | 1.11E-05 | 3.39E-05 | 2.788109 |
| GUCY1A2  | -0.19821 | 0.871633 | 4.422637 | -4.6461  | 1.11E-05 | 3.40E-05 | 2.786453 |
| CTDP1    | -0.13955 | 0.907802 | 6.311209 | -4.64559 | 1.11E-05 | 3.40E-05 | 2.784541 |
| NCALD    | -0.28161 | 0.82267  | 6.868132 | -4.64542 | 1.11E-05 | 3.40E-05 | 2.783886 |
| LTA      | -0.14788 | 0.902576 | 4.742308 | -4.64526 | 1.11E-05 | 3.40E-05 | 2.783271 |
| EFNB1    | -0.16962 | 0.889075 | 5.113077 | -4.64508 | 1.11E-05 | 3.41E-05 | 2.782599 |
| FRAS1    | -0.21493 | 0.861589 | 5.751978 | -4.64499 | 1.11E-05 | 3.41E-05 | 2.782285 |
| PRRG3    | -0.20556 | 0.867205 | 5.288352 | -4.64492 | 1.11E-05 | 3.41E-05 | 2.781986 |
| SLC4A1   | -0.45553 | 0.729244 | 8.316044 | -4.64411 | 1.12E-05 | 3.42E-05 | 2.778945 |
| DOC2A    | -0.15611 | 0.897444 | 4.508022 | -4.64399 | 1.12E-05 | 3.42E-05 | 2.778487 |
| TCL1B    | -0.16943 | 0.889194 | 5.311868 | -4.64362 | 1.12E-05 | 3.42E-05 | 2.77711  |
| CBFB     | 0.215087 | 1.160774 | 7.095275 | 4.643191 | 1.12E-05 | 3.42E-05 | 2.775491 |

|           |          |          |          |          |          |          |          |
|-----------|----------|----------|----------|----------|----------|----------|----------|
| RCL1      | -0.16496 | 0.891955 | 7.365385 | -4.64247 | 1.13E-05 | 3.43E-05 | 2.772772 |
| RAD23B    | 0.13401  | 1.097339 | 8.686703 | 4.642197 | 1.13E-05 | 3.43E-05 | 2.771749 |
| ZMIZ1     | 0.228319 | 1.171469 | 9.077253 | 4.641866 | 1.13E-05 | 3.44E-05 | 2.770502 |
| CTSG      | -0.1676  | 0.89032  | 5.224945 | -4.64111 | 1.13E-05 | 3.45E-05 | 2.767672 |
| PODXL     | -0.7634  | 0.589108 | 9.30967  | -4.6411  | 1.13E-05 | 3.45E-05 | 2.767617 |
| LAMB2     | -0.28151 | 0.822728 | 7.142747 | -4.64007 | 1.14E-05 | 3.46E-05 | 2.763756 |
| SLITRK3   | -0.13403 | 0.91128  | 3.902198 | -4.63962 | 1.14E-05 | 3.46E-05 | 2.762035 |
| C7orf49   | 0.165507 | 1.12156  | 7.86967  | 4.638345 | 1.14E-05 | 3.48E-05 | 2.757244 |
| CCNB2     | 0.413874 | 1.332259 | 4.839011 | 4.637611 | 1.15E-05 | 3.49E-05 | 2.754482 |
| ELOVL1    | 0.179932 | 1.132831 | 7.985934 | 4.63596  | 1.15E-05 | 3.51E-05 | 2.74827  |
| AIPL1     | -0.14426 | 0.904846 | 4.737143 | -4.63565 | 1.16E-05 | 3.51E-05 | 2.747112 |
| CAT       | -0.2337  | 0.850451 | 11.12791 | -4.63541 | 1.16E-05 | 3.51E-05 | 2.746214 |
| ARL4C     | 0.58442  | 1.499436 | 6.107912 | 4.634308 | 1.16E-05 | 3.53E-05 | 2.742053 |
| HIST1H2AF | 0.239841 | 1.180862 | 4.101429 | 4.633012 | 1.17E-05 | 3.55E-05 | 2.737179 |
| AAAS      | -0.14649 | 0.903447 | 6.985604 | -4.63256 | 1.17E-05 | 3.55E-05 | 2.735481 |
| ZC3H15    | 0.174705 | 1.128734 | 8.748132 | 4.631846 | 1.17E-05 | 3.56E-05 | 2.732792 |
| PARVA     | 0.136768 | 1.099439 | 6.942198 | 4.629504 | 1.18E-05 | 3.59E-05 | 2.723988 |
| ELAVL1    | 0.140314 | 1.102145 | 7.653516 | 4.629494 | 1.18E-05 | 3.59E-05 | 2.723948 |
| PIK3IP1   | 0.203874 | 1.151787 | 7.405165 | 4.628681 | 1.19E-05 | 3.60E-05 | 2.720891 |
| CAND1     | 0.171    | 1.125839 | 7.32956  | 4.6273   | 1.19E-05 | 3.62E-05 | 2.715703 |
| SPATA2L   | -0.34494 | 0.78734  | 7.427033 | -4.62683 | 1.20E-05 | 3.62E-05 | 2.713938 |
| KCNC3     | -0.15366 | 0.898969 | 4.709451 | -4.62623 | 1.20E-05 | 3.63E-05 | 2.711683 |
| ZNF140    | 0.195164 | 1.144854 | 5.868901 | 4.624939 | 1.21E-05 | 3.65E-05 | 2.706828 |
| PGLS      | 0.182783 | 1.135071 | 8.315604 | 4.623778 | 1.21E-05 | 3.66E-05 | 2.702468 |
| ACTR1B    | -0.12404 | 0.917615 | 7.836923 | -4.62223 | 1.22E-05 | 3.68E-05 | 2.696652 |
| REEP5     | 0.140097 | 1.101979 | 10.14363 | 4.620405 | 1.23E-05 | 3.71E-05 | 2.689798 |
| THTPA     | -0.16615 | 0.891218 | 7.771099 | -4.6204  | 1.23E-05 | 3.71E-05 | 2.689792 |
| CREB3L1   | -0.15982 | 0.895136 | 5.399011 | -4.62018 | 1.23E-05 | 3.71E-05 | 2.688958 |
| CYP26A1   | -0.15187 | 0.900083 | 4.660769 | -4.61908 | 1.23E-05 | 3.72E-05 | 2.684831 |
| TNFRSF10I | -0.22774 | 0.853972 | 5.319121 | -4.61887 | 1.23E-05 | 3.72E-05 | 2.684017 |
| MTHFD2    | 0.43286  | 1.349907 | 5.732747 | 4.61886  | 1.23E-05 | 3.72E-05 | 2.683998 |
| TLN2      | -0.33867 | 0.790772 | 8.322527 | -4.61718 | 1.24E-05 | 3.75E-05 | 2.677701 |
| HNRNPF    | 0.179208 | 1.132262 | 8.202967 | 4.617129 | 1.24E-05 | 3.75E-05 | 2.677499 |
| LINC00574 | -0.22234 | 0.857172 | 5.904615 | -4.61621 | 1.25E-05 | 3.76E-05 | 2.674051 |
| ASB8      | -0.15244 | 0.899728 | 6.894835 | -4.61583 | 1.25E-05 | 3.76E-05 | 2.672642 |
| FOXP3     | -0.13815 | 0.908681 | 4.884725 | -4.61444 | 1.26E-05 | 3.78E-05 | 2.667405 |
| BMP8B     | -0.20204 | 0.869318 | 4.938132 | -4.61355 | 1.26E-05 | 3.80E-05 | 2.664062 |
| NFIL3     | -0.49204 | 0.71102  | 8.064945 | -4.61122 | 1.27E-05 | 3.83E-05 | 2.655331 |
| TAPBP     | 0.175633 | 1.12946  | 6.89033  | 4.611    | 1.27E-05 | 3.83E-05 | 2.654504 |
| DNAJC3    | 0.202787 | 1.15092  | 5.965714 | 4.609718 | 1.28E-05 | 3.85E-05 | 2.649698 |
| TP53BP2   | 0.256304 | 1.194415 | 6.66044  | 4.609641 | 1.28E-05 | 3.85E-05 | 2.649408 |
| PPP1R3C   | 0.388343 | 1.308889 | 7.097473 | 4.609242 | 1.28E-05 | 3.85E-05 | 2.647914 |
| RFPL3     | -0.22563 | 0.85522  | 5.854945 | -4.60888 | 1.28E-05 | 3.86E-05 | 2.646567 |
| SNPH      | -0.16255 | 0.893444 | 5.524835 | -4.60853 | 1.29E-05 | 3.86E-05 | 2.645235 |
| CASP7     | 0.21915  | 1.164047 | 6.36011  | 4.608152 | 1.29E-05 | 3.87E-05 | 2.643828 |
| TOR1B     | 0.158314 | 1.115982 | 6.912418 | 4.607264 | 1.29E-05 | 3.88E-05 | 2.640498 |
| ADGRG3    | -0.15277 | 0.899523 | 4.97989  | -4.60575 | 1.30E-05 | 3.90E-05 | 2.634841 |

|           |          |          |          |          |          |          |          |
|-----------|----------|----------|----------|----------|----------|----------|----------|
| GCGR      | -0.19615 | 0.872874 | 5.516044 | -4.60237 | 1.32E-05 | 3.95E-05 | 2.622179 |
| KATNA1    | 0.216729 | 1.162096 | 7.27     | 4.601782 | 1.32E-05 | 3.96E-05 | 2.619958 |
| ELP3      | 0.166266 | 1.12215  | 7.224176 | 4.600648 | 1.33E-05 | 3.97E-05 | 2.615709 |
| LOC10192  | -0.14018 | 0.907407 | 4.102637 | -4.60057 | 1.33E-05 | 3.97E-05 | 2.615429 |
| MMP26     | -0.18454 | 0.879932 | 4.524615 | -4.60019 | 1.33E-05 | 3.98E-05 | 2.613984 |
| LMBR1L    | -0.17797 | 0.883945 | 6.143297 | -4.59958 | 1.33E-05 | 3.99E-05 | 2.611706 |
| TPK1      | 0.228005 | 1.171214 | 5.182967 | 4.597467 | 1.34E-05 | 4.02E-05 | 2.603801 |
| EVI2B     | 0.503034 | 1.417191 | 4.655275 | 4.596934 | 1.35E-05 | 4.02E-05 | 2.601805 |
| CCR4      | -0.18776 | 0.877966 | 4.747802 | -4.59677 | 1.35E-05 | 4.03E-05 | 2.601204 |
| PPP1R17   | -0.14072 | 0.907063 | 4.427802 | -4.59669 | 1.35E-05 | 4.03E-05 | 2.600897 |
| AGXT      | -0.82857 | 0.563089 | 7.284835 | -4.59538 | 1.35E-05 | 4.04E-05 | 2.595997 |
| EFHC1     | 0.250551 | 1.189661 | 5.328681 | 4.59438  | 1.36E-05 | 4.06E-05 | 2.592247 |
| PAK1IP1   | 0.165734 | 1.121737 | 5.28     | 4.59425  | 1.36E-05 | 4.06E-05 | 2.59176  |
| SST       | -0.36076 | 0.778752 | 4.757253 | -4.59109 | 1.38E-05 | 4.11E-05 | 2.579947 |
| BMPR1B    | -0.22472 | 0.855761 | 5.336484 | -4.58908 | 1.39E-05 | 4.14E-05 | 2.57242  |
| MPRIP     | -0.15664 | 0.897113 | 6.053846 | -4.58689 | 1.40E-05 | 4.17E-05 | 2.56424  |
| DSG3      | -0.1327  | 0.912126 | 4.293077 | -4.58669 | 1.40E-05 | 4.18E-05 | 2.563497 |
| LMAN1L    | -0.17905 | 0.883283 | 5.714066 | -4.58597 | 1.40E-05 | 4.19E-05 | 2.560786 |
| GULP1     | 0.191411 | 1.14188  | 7.448132 | 4.584408 | 1.41E-05 | 4.21E-05 | 2.554958 |
| ZMAT3     | 0.202401 | 1.150612 | 6.528132 | 4.583801 | 1.42E-05 | 4.22E-05 | 2.55269  |
| PCBP3     | -0.17632 | 0.884955 | 5.378242 | -4.5825  | 1.42E-05 | 4.24E-05 | 2.547849 |
| GYPC      | 0.27201  | 1.207489 | 7.614945 | 4.58063  | 1.43E-05 | 4.27E-05 | 2.540846 |
| TRAV12-2  | -0.22453 | 0.855873 | 4.625055 | -4.58031 | 1.44E-05 | 4.27E-05 | 2.539655 |
| AQP8      | -0.18216 | 0.881383 | 5.282747 | -4.57938 | 1.44E-05 | 4.29E-05 | 2.536183 |
| NAA15     | 0.20442  | 1.152223 | 5.42     | 4.578987 | 1.44E-05 | 4.29E-05 | 2.53471  |
| GPS1      | -0.19761 | 0.871995 | 7.85989  | -4.57887 | 1.44E-05 | 4.29E-05 | 2.534287 |
| IPO13     | -0.18174 | 0.881637 | 7.261648 | -4.57872 | 1.44E-05 | 4.29E-05 | 2.53373  |
| TAAR3     | -0.14084 | 0.906994 | 4.202747 | -4.57809 | 1.45E-05 | 4.30E-05 | 2.531347 |
| HYPM      | -0.1562  | 0.897387 | 4.493846 | -4.57649 | 1.46E-05 | 4.33E-05 | 2.525396 |
| TTLL7     | 0.295473 | 1.227288 | 4.702418 | 4.575972 | 1.46E-05 | 4.33E-05 | 2.523456 |
| JPH2      | -0.14379 | 0.90514  | 4.518462 | -4.57229 | 1.48E-05 | 4.39E-05 | 2.509698 |
| TBC1D13   | -0.20435 | 0.867928 | 7.723077 | -4.57079 | 1.49E-05 | 4.42E-05 | 2.504103 |
| RTCA      | 0.274889 | 1.209901 | 9.255934 | 4.570327 | 1.49E-05 | 4.43E-05 | 2.502395 |
| ESPL1     | -0.4625  | 0.725729 | 6.448901 | -4.5681  | 1.51E-05 | 4.46E-05 | 2.494093 |
| HS3ST1    | 0.404155 | 1.323313 | 4.976813 | 4.56794  | 1.51E-05 | 4.46E-05 | 2.493493 |
| KHK       | -0.30496 | 0.809464 | 9.885934 | -4.56586 | 1.52E-05 | 4.50E-05 | 2.485742 |
| GNL1      | -0.13688 | 0.909481 | 5.112527 | -4.56504 | 1.52E-05 | 4.51E-05 | 2.482683 |
| KLC2      | -0.13338 | 0.911692 | 5.201868 | -4.5642  | 1.53E-05 | 4.52E-05 | 2.479571 |
| S100A2    | 0.777594 | 1.71427  | 9.506264 | 4.564157 | 1.53E-05 | 4.52E-05 | 2.479392 |
| ABCC4     | 0.303159 | 1.233844 | 7.632088 | 4.562874 | 1.54E-05 | 4.54E-05 | 2.474613 |
| NAMPT     | 0.31343  | 1.242659 | 7.839341 | 4.562425 | 1.54E-05 | 4.55E-05 | 2.472942 |
| CFD       | 0.384029 | 1.304981 | 5.591209 | 4.561339 | 1.55E-05 | 4.57E-05 | 2.468893 |
| TPCN1     | -0.24373 | 0.844556 | 8.491429 | -4.56093 | 1.55E-05 | 4.57E-05 | 2.467385 |
| BID       | 0.226628 | 1.170097 | 5.96033  | 4.56069  | 1.55E-05 | 4.58E-05 | 2.466476 |
| LINC00341 | -0.23179 | 0.851576 | 5.704725 | -4.55948 | 1.56E-05 | 4.60E-05 | 2.46197  |
| NDUFB2    | 0.149164 | 1.108927 | 11.57615 | 4.559311 | 1.56E-05 | 4.60E-05 | 2.461341 |
| ALOX12    | -0.12726 | 0.915571 | 4.360549 | -4.5589  | 1.56E-05 | 4.60E-05 | 2.459817 |



|           |          |          |          |          |          |          |          |
|-----------|----------|----------|----------|----------|----------|----------|----------|
| LEP       | -0.13163 | 0.912798 | 4.051429 | -4.55849 | 1.56E-05 | 4.61E-05 | 2.458277 |
| ISG15     | 0.842174 | 1.792749 | 7.094286 | 4.557095 | 1.57E-05 | 4.63E-05 | 2.45309  |
| TAS2R4    | -0.18055 | 0.882369 | 4.336154 | -4.55675 | 1.57E-05 | 4.64E-05 | 2.451821 |
| TSPAN8    | 0.791024 | 1.730302 | 8.007253 | 4.555983 | 1.58E-05 | 4.65E-05 | 2.448952 |
| CYP3A5    | -0.59863 | 0.660379 | 5.945495 | -4.55475 | 1.59E-05 | 4.67E-05 | 2.444353 |
| DLX5      | -0.13857 | 0.908422 | 4.436044 | -4.55429 | 1.59E-05 | 4.68E-05 | 2.442649 |
| SLC22A4   | -0.34815 | 0.785588 | 7.810879 | -4.55344 | 1.59E-05 | 4.69E-05 | 2.439485 |
| MYBPC3    | -0.16275 | 0.893318 | 6.325604 | -4.55215 | 1.60E-05 | 4.71E-05 | 2.434679 |
| DNAJC2    | 0.176319 | 1.129997 | 7.391538 | 4.552084 | 1.60E-05 | 4.71E-05 | 2.434442 |
| TFF2      | -0.13351 | 0.91161  | 4.285934 | -4.55207 | 1.60E-05 | 4.71E-05 | 2.4344   |
| SERTAD3   | -0.24746 | 0.842376 | 6.761758 | -4.55113 | 1.61E-05 | 4.73E-05 | 2.430913 |
| CYBB      | 0.45572  | 1.371467 | 5.282747 | 4.549357 | 1.62E-05 | 4.76E-05 | 2.424302 |
| EIF3M     | 0.201778 | 1.150115 | 8.82978  | 4.549287 | 1.62E-05 | 4.76E-05 | 2.42404  |
| RGS7      | -0.52583 | 0.694561 | 4.907802 | -4.54888 | 1.62E-05 | 4.76E-05 | 2.422517 |
| LPL       | -0.5314  | 0.691885 | 6.064396 | -4.54886 | 1.62E-05 | 4.76E-05 | 2.422463 |
| SH3YL1    | -0.35463 | 0.782071 | 10.18637 | -4.5483  | 1.63E-05 | 4.77E-05 | 2.420377 |
| LIMD2     | -0.1715  | 0.88792  | 4.867802 | -4.54768 | 1.63E-05 | 4.78E-05 | 2.418053 |
| TMPRSS2   | -0.29795 | 0.813409 | 7.155055 | -4.5469  | 1.63E-05 | 4.79E-05 | 2.41517  |
| GHRH      | -0.1614  | 0.894159 | 4.387363 | -4.5464  | 1.64E-05 | 4.80E-05 | 2.41331  |
| DPT       | -0.17187 | 0.887692 | 4.180879 | -4.54634 | 1.64E-05 | 4.80E-05 | 2.413099 |
| SYNGR4    | -0.15378 | 0.898894 | 4.713956 | -4.54582 | 1.64E-05 | 4.81E-05 | 2.411139 |
| NELFB     | 0.168314 | 1.123744 | 7.017363 | 4.54527  | 1.65E-05 | 4.82E-05 | 2.409105 |
| CSAD      | -0.18304 | 0.880846 | 5.152747 | -4.54459 | 1.65E-05 | 4.83E-05 | 2.406567 |
| LINC0126C | -0.17174 | 0.887772 | 5.656813 | -4.54269 | 1.66E-05 | 4.86E-05 | 2.399537 |
| DTX2      | -0.16588 | 0.891385 | 4.593407 | -4.54265 | 1.66E-05 | 4.86E-05 | 2.399365 |
| TRPV4     | -0.27332 | 0.827414 | 5.695495 | -4.54155 | 1.67E-05 | 4.88E-05 | 2.395277 |
| PHF21A    | 0.147    | 1.107265 | 5.957692 | 4.539785 | 1.68E-05 | 4.91E-05 | 2.38873  |
| NELL1     | -0.44136 | 0.736439 | 6.31044  | -4.53822 | 1.69E-05 | 4.94E-05 | 2.382905 |
| MB        | -0.18197 | 0.881501 | 5.161538 | -4.53762 | 1.69E-05 | 4.95E-05 | 2.38068  |
| PSMD10    | 0.163367 | 1.119898 | 8.392308 | 4.533617 | 1.72E-05 | 5.03E-05 | 2.365835 |
| TONSL     | -0.18705 | 0.878398 | 5.10011  | -4.53347 | 1.72E-05 | 5.03E-05 | 2.365289 |
| PLIN3     | 0.285541 | 1.218867 | 7.960549 | 4.533065 | 1.72E-05 | 5.03E-05 | 2.363785 |
| GRHPR     | -0.265   | 0.832202 | 10.53418 | -4.53229 | 1.73E-05 | 5.05E-05 | 2.360922 |
| ACO1      | -0.28033 | 0.823404 | 10.21659 | -4.53215 | 1.73E-05 | 5.05E-05 | 2.360375 |
| ZNF562    | 0.184932 | 1.136764 | 5.773407 | 4.529464 | 1.75E-05 | 5.10E-05 | 2.350429 |
| MFAP3L    | 0.186787 | 1.138226 | 5.937802 | 4.529341 | 1.75E-05 | 5.10E-05 | 2.34997  |
| LCT       | -0.169   | 0.889456 | 4.861209 | -4.52923 | 1.75E-05 | 5.10E-05 | 2.349548 |
| FXYD3     | -0.19792 | 0.871805 | 6.465604 | -4.52918 | 1.75E-05 | 5.10E-05 | 2.349391 |
| VSTM4     | -0.30486 | 0.809524 | 5.890769 | -4.52601 | 1.77E-05 | 5.16E-05 | 2.337619 |
| DNAJC15   | 0.232319 | 1.174722 | 9.089231 | 4.526    | 1.77E-05 | 5.16E-05 | 2.337585 |
| ACTR2     | 0.246111 | 1.186006 | 8.606703 | 4.525868 | 1.77E-05 | 5.16E-05 | 2.337097 |
| TUBB6     | 0.496261 | 1.410553 | 7.197143 | 4.524556 | 1.78E-05 | 5.18E-05 | 2.332234 |
| BANF1     | 0.20385  | 1.151768 | 9.174066 | 4.52448  | 1.78E-05 | 5.18E-05 | 2.331952 |
| SH3BGRL   | 0.172406 | 1.126936 | 9.093516 | 4.523239 | 1.79E-05 | 5.21E-05 | 2.327354 |
| NOTCH2    | 0.130242 | 1.094477 | 6.765275 | 4.521525 | 1.80E-05 | 5.24E-05 | 2.321003 |
| CACNA1E   | -0.17231 | 0.887418 | 4.330659 | -4.52141 | 1.80E-05 | 5.24E-05 | 2.320594 |
| MCUR1     | -0.25475 | 0.838133 | 8.73033  | -4.5192  | 1.82E-05 | 5.28E-05 | 2.312376 |

|         |          |          |          |          |          |          |          |
|---------|----------|----------|----------|----------|----------|----------|----------|
| FOXRED2 | -0.18235 | 0.881265 | 5.543956 | -4.51714 | 1.83E-05 | 5.32E-05 | 2.304782 |
| DDB2    | 0.248184 | 1.187711 | 5.700989 | 4.514441 | 1.85E-05 | 5.38E-05 | 2.294775 |
| DGKZ    | 0.31287  | 1.242176 | 7.783846 | 4.512775 | 1.87E-05 | 5.41E-05 | 2.288613 |
| NTF3    | -0.17828 | 0.883756 | 4.969231 | -4.51262 | 1.87E-05 | 5.41E-05 | 2.288037 |
| PTP4A2  | 0.140604 | 1.102366 | 8.896703 | 4.512556 | 1.87E-05 | 5.41E-05 | 2.287803 |
| ZC3HAV1 | 0.168164 | 1.123628 | 7.090549 | 4.512551 | 1.87E-05 | 5.41E-05 | 2.287783 |
| TSPO2   | -0.17537 | 0.885542 | 5.121758 | -4.51197 | 1.87E-05 | 5.42E-05 | 2.285629 |
| TLE6    | -0.16427 | 0.89238  | 4.486593 | -4.51116 | 1.88E-05 | 5.44E-05 | 2.282628 |
| KCNN2   | -0.73577 | 0.600496 | 5.306374 | -4.5088  | 1.89E-05 | 5.48E-05 | 2.273903 |
| PHKB    | 0.196203 | 1.145679 | 7.736154 | 4.508735 | 1.90E-05 | 5.48E-05 | 2.273668 |
| FAM129A | 0.286362 | 1.219561 | 4.737912 | 4.508213 | 1.90E-05 | 5.49E-05 | 2.27174  |
| ACKR3   | -0.50172 | 0.706264 | 6.304505 | -4.50813 | 1.90E-05 | 5.49E-05 | 2.271429 |
| GDE1    | 0.194435 | 1.144276 | 8.065714 | 4.507594 | 1.90E-05 | 5.50E-05 | 2.269453 |
| ANPEP   | 0.337444 | 1.263516 | 10.30187 | 4.506325 | 1.91E-05 | 5.53E-05 | 2.264762 |
| RALB    | 0.165145 | 1.121279 | 8.353187 | 4.506255 | 1.91E-05 | 5.53E-05 | 2.264503 |
| NUCB2   | 0.271633 | 1.207173 | 6.797802 | 4.50538  | 1.92E-05 | 5.54E-05 | 2.261266 |
| DHRS11  | -0.25589 | 0.837468 | 6.288242 | -4.50435 | 1.93E-05 | 5.56E-05 | 2.257469 |
| TMEM8A  | 0.256097 | 1.194243 | 6.610989 | 4.504129 | 1.93E-05 | 5.57E-05 | 2.256645 |
| EIF4G1  | 0.16856  | 1.123936 | 6.988571 | 4.503631 | 1.93E-05 | 5.58E-05 | 2.254806 |
| TMEM74B | -0.14842 | 0.902241 | 4.907912 | -4.49986 | 1.96E-05 | 5.66E-05 | 2.240863 |
| CASQ2   | -0.22343 | 0.856527 | 5.115165 | -4.49946 | 1.96E-05 | 5.66E-05 | 2.2394   |
| ABTB2   | -0.19453 | 0.873857 | 6.53989  | -4.49673 | 1.99E-05 | 5.72E-05 | 2.229321 |
| TNS1    | -0.20432 | 0.867948 | 7.524615 | -4.49621 | 1.99E-05 | 5.73E-05 | 2.227412 |
| NPTX1   | -0.1717  | 0.887796 | 4.588571 | -4.49383 | 2.01E-05 | 5.78E-05 | 2.218617 |
| STX7    | 0.177357 | 1.130811 | 8.938791 | 4.493623 | 2.01E-05 | 5.78E-05 | 2.217853 |
| RLBP1   | -0.18545 | 0.879375 | 5.053077 | -4.49234 | 2.02E-05 | 5.81E-05 | 2.213117 |
| TRAV10  | -0.14077 | 0.907033 | 4.425604 | -4.49105 | 2.03E-05 | 5.84E-05 | 2.208377 |
| OR7E14P | 0.336763 | 1.26292  | 7.120879 | 4.489944 | 2.04E-05 | 5.86E-05 | 2.204284 |
| CHRNA6  | -0.13357 | 0.911576 | 4.893516 | -4.48915 | 2.04E-05 | 5.87E-05 | 2.20137  |
| BNIP3L  | -0.17993 | 0.882747 | 9.434286 | -4.48913 | 2.04E-05 | 5.87E-05 | 2.201297 |
| HLA-G   | 0.176304 | 1.129986 | 8.280879 | 4.48886  | 2.05E-05 | 5.88E-05 | 2.200286 |
| ADIPOQ  | -0.18377 | 0.880401 | 3.91956  | -4.48845 | 2.05E-05 | 5.89E-05 | 2.198774 |
| MYO16   | -0.14384 | 0.905106 | 4.886044 | -4.48803 | 2.05E-05 | 5.89E-05 | 2.197221 |
| AKIP1   | 0.160179 | 1.117426 | 6.047253 | 4.488016 | 2.05E-05 | 5.89E-05 | 2.197175 |
| BDH2    | -0.21822 | 0.859627 | 10.90231 | -4.48781 | 2.05E-05 | 5.89E-05 | 2.196431 |
| SLC12A9 | -0.15462 | 0.89837  | 6.405714 | -4.48712 | 2.06E-05 | 5.91E-05 | 2.193863 |
| HYI     | -0.18756 | 0.878089 | 7.517033 | -4.48304 | 2.09E-05 | 6.00E-05 | 2.178818 |
| SPCS3   | 0.190884 | 1.141463 | 7.794176 | 4.4823   | 2.10E-05 | 6.01E-05 | 2.17611  |
| CD5     | -0.13805 | 0.908748 | 5.89956  | -4.48183 | 2.10E-05 | 6.02E-05 | 2.174395 |
| XRCC2   | -0.24903 | 0.84146  | 6.00033  | -4.48138 | 2.11E-05 | 6.03E-05 | 2.172731 |
| MC5R    | -0.15875 | 0.895802 | 4.487802 | -4.47966 | 2.12E-05 | 6.07E-05 | 2.166372 |
| PPP1R26 | -0.18679 | 0.87856  | 6.462198 | -4.47929 | 2.12E-05 | 6.08E-05 | 2.165021 |
| POT1    | 0.161188 | 1.118208 | 6.353187 | 4.478655 | 2.13E-05 | 6.09E-05 | 2.162684 |
| SHARPIN | -0.13684 | 0.909512 | 7.004725 | -4.47772 | 2.14E-05 | 6.11E-05 | 2.159231 |
| CHPT1   | -0.23732 | 0.848318 | 9.613077 | -4.47618 | 2.15E-05 | 6.14E-05 | 2.153563 |
| PEX7    | -0.20111 | 0.86988  | 7.260549 | -4.47477 | 2.16E-05 | 6.17E-05 | 2.148389 |
| AGTPBP1 | 0.170411 | 1.125379 | 5.932747 | 4.473876 | 2.17E-05 | 6.19E-05 | 2.145095 |

|          |          |          |          |          |          |          |          |
|----------|----------|----------|----------|----------|----------|----------|----------|
| FMNL1    | -0.18229 | 0.881306 | 5.437033 | -4.47339 | 2.17E-05 | 6.20E-05 | 2.143305 |
| APOD     | -0.50186 | 0.706193 | 6.497912 | -4.47332 | 2.17E-05 | 6.20E-05 | 2.143045 |
| FURIN    | -0.18286 | 0.880958 | 6.941099 | -4.47262 | 2.18E-05 | 6.22E-05 | 2.14049  |
| HCFC1R1  | 0.199314 | 1.148152 | 7.897692 | 4.471222 | 2.19E-05 | 6.25E-05 | 2.135334 |
| GOLGA3   | 0.177087 | 1.130599 | 6.706484 | 4.469952 | 2.20E-05 | 6.28E-05 | 2.130662 |
| SLC28A3  | -0.1373  | 0.909216 | 4.793407 | -4.46979 | 2.20E-05 | 6.28E-05 | 2.130065 |
| HRC      | -0.15687 | 0.896966 | 4.293077 | -4.46857 | 2.21E-05 | 6.31E-05 | 2.125571 |
| TGM1     | -0.20323 | 0.868603 | 4.694066 | -4.46851 | 2.21E-05 | 6.31E-05 | 2.12537  |
| TRMT1L   | 0.223691 | 1.167717 | 6.006703 | 4.468401 | 2.21E-05 | 6.31E-05 | 2.124959 |
| TBP      | 0.139671 | 1.101654 | 6.654286 | 4.467933 | 2.22E-05 | 6.32E-05 | 2.123238 |
| CD33     | -0.20016 | 0.870454 | 5.563846 | -4.46709 | 2.23E-05 | 6.33E-05 | 2.120154 |
| FHL3     | -0.17068 | 0.888423 | 6.084945 | -4.46708 | 2.23E-05 | 6.33E-05 | 2.120106 |
| DARS     | 0.136188 | 1.098998 | 8.995824 | 4.46674  | 2.23E-05 | 6.34E-05 | 2.118854 |
| ESRRG    | -0.24243 | 0.845317 | 8.080549 | -4.46664 | 2.23E-05 | 6.34E-05 | 2.118482 |
| IL25     | -0.15759 | 0.896522 | 5.380549 | -4.4642  | 2.25E-05 | 6.40E-05 | 2.10953  |
| FNDC3B   | 0.318865 | 1.247349 | 7.616593 | 4.463317 | 2.26E-05 | 6.41E-05 | 2.106279 |
| SLC38A10 | -0.2052  | 0.867417 | 7.134396 | -4.46328 | 2.26E-05 | 6.41E-05 | 2.106136 |
| BRCC3    | 0.249391 | 1.188705 | 6.055934 | 4.458802 | 2.30E-05 | 6.52E-05 | 2.089697 |
| GPR65    | 0.30099  | 1.23199  | 4.193407 | 4.458798 | 2.30E-05 | 6.52E-05 | 2.089681 |
| TMEM147  | -0.171   | 0.88823  | 5.870659 | -4.45729 | 2.31E-05 | 6.56E-05 | 2.084164 |
| RPS6KC1  | 0.251676 | 1.19059  | 5.98989  | 4.452212 | 2.36E-05 | 6.68E-05 | 2.065515 |
| LYRM1    | -0.15657 | 0.897158 | 9.737143 | -4.4508  | 2.37E-05 | 6.72E-05 | 2.060348 |
| PTCH2    | -0.146   | 0.90375  | 5.067582 | -4.45008 | 2.38E-05 | 6.73E-05 | 2.057692 |
| ZNF552   | 0.213802 | 1.15974  | 6.706813 | 4.449552 | 2.38E-05 | 6.75E-05 | 2.055759 |
| SPINK5   | -0.19558 | 0.873219 | 4.841978 | -4.44887 | 2.39E-05 | 6.76E-05 | 2.053244 |
| MYO1A    | -0.15922 | 0.895511 | 4.656484 | -4.44837 | 2.39E-05 | 6.77E-05 | 2.051437 |
| CANX     | 0.195947 | 1.145476 | 9.874505 | 4.44768  | 2.40E-05 | 6.79E-05 | 2.048899 |
| WWOX     | -0.14026 | 0.907355 | 7.228901 | -4.44733 | 2.40E-05 | 6.79E-05 | 2.047629 |
| GNL3     | 0.250889 | 1.18994  | 7.144066 | 4.446926 | 2.40E-05 | 6.80E-05 | 2.046133 |
| EPPIN    | -0.13401 | 0.911295 | 4.003297 | -4.44613 | 2.41E-05 | 6.82E-05 | 2.043235 |
| TMX2     | 0.157643 | 1.115463 | 9.621868 | 4.44378  | 2.43E-05 | 6.88E-05 | 2.034606 |
| HMOX1    | 0.499821 | 1.414038 | 9.499121 | 4.443228 | 2.44E-05 | 6.89E-05 | 2.032586 |
| ELN      | -0.16296 | 0.893193 | 5.096374 | -4.44306 | 2.44E-05 | 6.90E-05 | 2.031974 |
| PRB4     | -0.17666 | 0.884748 | 4.892857 | -4.44256 | 2.45E-05 | 6.90E-05 | 2.030122 |
| PPP2R3C  | 0.263449 | 1.200345 | 6.835495 | 4.442527 | 2.45E-05 | 6.90E-05 | 2.030019 |
| GNB2L1   | 0.166565 | 1.122383 | 12.3178  | 4.442508 | 2.45E-05 | 6.90E-05 | 2.029948 |
| PUF60    | 0.159889 | 1.117201 | 8.774066 | 4.441163 | 2.46E-05 | 6.94E-05 | 2.025023 |
| IFIT5    | 0.274758 | 1.209792 | 7.16     | 4.44081  | 2.46E-05 | 6.94E-05 | 2.023729 |
| ARHGEF38 | -0.18974 | 0.876764 | 4.957912 | -4.43927 | 2.48E-05 | 6.98E-05 | 2.018103 |
| PLK3     | -0.2333  | 0.850684 | 5.165934 | -4.43887 | 2.48E-05 | 6.99E-05 | 2.016643 |
| AP2M1    | 0.247812 | 1.187405 | 9.624066 | 4.437973 | 2.49E-05 | 7.01E-05 | 2.013342 |
| FCER1G   | 0.575072 | 1.489752 | 7.222637 | 4.435318 | 2.51E-05 | 7.08E-05 | 2.003627 |
| DNAJB9   | -0.22232 | 0.857184 | 9.255495 | -4.43504 | 2.52E-05 | 7.09E-05 | 2.002595 |
| PPY2P    | -0.14307 | 0.905592 | 4.211209 | -4.43404 | 2.53E-05 | 7.11E-05 | 1.998936 |
| COBL     | 0.206415 | 1.153818 | 7.900769 | 4.430486 | 2.56E-05 | 7.21E-05 | 1.985953 |
| RSG1     | -0.16136 | 0.894183 | 5.349121 | -4.42859 | 2.58E-05 | 7.26E-05 | 1.979022 |
| APOM     | -0.48576 | 0.714119 | 11.12044 | -4.42713 | 2.59E-05 | 7.30E-05 | 1.973672 |

|          |          |          |          |          |          |          |          |
|----------|----------|----------|----------|----------|----------|----------|----------|
| INE1     | -0.15717 | 0.896783 | 5.72967  | -4.42703 | 2.59E-05 | 7.30E-05 | 1.973339 |
| HIST1H4D | -0.20899 | 0.865145 | 4.072308 | -4.42654 | 2.60E-05 | 7.31E-05 | 1.971522 |
| INS      | -0.15034 | 0.901039 | 3.78044  | -4.42538 | 2.61E-05 | 7.34E-05 | 1.967305 |
| CD70     | -0.15999 | 0.895031 | 6.211319 | -4.42509 | 2.61E-05 | 7.34E-05 | 1.966223 |
| MRPS16   | 0.148957 | 1.108767 | 8.126703 | 4.423371 | 2.63E-05 | 7.39E-05 | 1.959953 |
| KCNK5    | -0.46491 | 0.724515 | 8.399011 | -4.42178 | 2.65E-05 | 7.43E-05 | 1.954151 |
| CYP7B1   | 0.16257  | 1.119279 | 4.656044 | 4.42096  | 2.66E-05 | 7.45E-05 | 1.951149 |
| ZNF350   | 0.152362 | 1.111388 | 5.021648 | 4.420261 | 2.66E-05 | 7.47E-05 | 1.948598 |
| HAO1     | -0.31517 | 0.803757 | 4.451538 | -4.42013 | 2.66E-05 | 7.47E-05 | 1.948112 |
| METTL3   | 0.174589 | 1.128643 | 7.342857 | 4.416904 | 2.70E-05 | 7.56E-05 | 1.936346 |
| ATP6V1C1 | 0.185329 | 1.137076 | 7.401429 | 4.416407 | 2.70E-05 | 7.57E-05 | 1.934534 |
| TIPIN    | 0.216063 | 1.161559 | 4.94967  | 4.41437  | 2.72E-05 | 7.63E-05 | 1.927102 |
| GTPBP8   | 0.165053 | 1.121207 | 7.609011 | 4.412517 | 2.74E-05 | 7.68E-05 | 1.920342 |
| MIS12    | 0.173812 | 1.128035 | 6.347473 | 4.412024 | 2.75E-05 | 7.69E-05 | 1.918548 |
| NMNAT2   | -0.14182 | 0.906374 | 4.757912 | -4.41001 | 2.77E-05 | 7.75E-05 | 1.911199 |
| CD163    | 0.54186  | 1.455848 | 5.261648 | 4.409999 | 2.77E-05 | 7.75E-05 | 1.911162 |
| FLRT1    | -0.19896 | 0.871178 | 5.398352 | -4.40796 | 2.79E-05 | 7.81E-05 | 1.903727 |
| C1orf159 | -0.15353 | 0.899047 | 5.275165 | -4.40676 | 2.80E-05 | 7.84E-05 | 1.899347 |
| LYRM4    | 0.196725 | 1.146093 | 7.29989  | 4.405186 | 2.82E-05 | 7.88E-05 | 1.893627 |
| SIT1     | -0.15468 | 0.898331 | 6.032857 | -4.40469 | 2.83E-05 | 7.89E-05 | 1.891823 |
| RFPL2    | -0.17187 | 0.887692 | 3.860879 | -4.40465 | 2.83E-05 | 7.89E-05 | 1.891688 |
| STAMBP   | 0.142217 | 1.1036   | 7.70011  | 4.404642 | 2.83E-05 | 7.89E-05 | 1.891643 |
| NOD1     | -0.15588 | 0.897585 | 6.138352 | -4.40313 | 2.84E-05 | 7.94E-05 | 1.886123 |
| FBXO28   | 0.214604 | 1.160385 | 7.783297 | 4.402281 | 2.85E-05 | 7.96E-05 | 1.883044 |
| LIPC     | 0.564686 | 1.479066 | 7.55011  | 4.401509 | 2.86E-05 | 7.98E-05 | 1.880234 |
| ANKRD17  | 0.153546 | 1.1123   | 7.465495 | 4.401292 | 2.86E-05 | 7.98E-05 | 1.879445 |
| ANKRD49  | 0.194072 | 1.143988 | 7.409231 | 4.401272 | 2.86E-05 | 7.98E-05 | 1.879374 |
| RPAP1    | -0.13133 | 0.91299  | 6.175275 | -4.40101 | 2.87E-05 | 7.99E-05 | 1.878426 |
| WBP2     | -0.16886 | 0.889545 | 7.087802 | -4.40085 | 2.87E-05 | 7.99E-05 | 1.877852 |
| FILIP1L  | -0.3502  | 0.784474 | 5.747692 | -4.4006  | 2.87E-05 | 7.99E-05 | 1.876921 |
| ASIC3    | -0.18703 | 0.878413 | 4.381209 | -4.39986 | 2.88E-05 | 8.01E-05 | 1.874223 |
| MGST3    | 0.158623 | 1.116221 | 11.79648 | 4.399565 | 2.88E-05 | 8.02E-05 | 1.87316  |
| KLF3     | 0.19015  | 1.140882 | 6.470769 | 4.399281 | 2.89E-05 | 8.03E-05 | 1.872124 |
| SIGLEC9  | -0.17997 | 0.882724 | 4.812527 | -4.39696 | 2.91E-05 | 8.09E-05 | 1.863664 |
| MGEA5    | 0.233343 | 1.175556 | 8.115824 | 4.396048 | 2.92E-05 | 8.12E-05 | 1.860362 |
| INA      | -0.14063 | 0.907124 | 5.182198 | -4.3959  | 2.92E-05 | 8.12E-05 | 1.859841 |
| IGSF6    | 0.304512 | 1.235001 | 3.903626 | 4.394662 | 2.94E-05 | 8.16E-05 | 1.855321 |
| CBX7     | -0.22322 | 0.85665  | 7.864615 | -4.3944  | 2.94E-05 | 8.16E-05 | 1.85435  |
| USP47    | 0.160034 | 1.117313 | 7.740659 | 4.393113 | 2.95E-05 | 8.20E-05 | 1.849688 |
| CCDC177  | -0.16236 | 0.893564 | 4.393626 | -4.39248 | 2.96E-05 | 8.22E-05 | 1.847381 |
| TROVE2   | 0.254285 | 1.192744 | 8.458571 | 4.392182 | 2.96E-05 | 8.22E-05 | 1.846304 |
| HARS     | 0.149705 | 1.109343 | 8.120769 | 4.39207  | 2.97E-05 | 8.23E-05 | 1.845895 |
| MYH10    | 0.173812 | 1.128035 | 8.697473 | 4.391776 | 2.97E-05 | 8.23E-05 | 1.844826 |
| NSUN3    | 0.186744 | 1.138192 | 7.145824 | 4.390362 | 2.98E-05 | 8.27E-05 | 1.839686 |
| PSMC4    | 0.157971 | 1.115717 | 7.886813 | 4.390252 | 2.99E-05 | 8.27E-05 | 1.839286 |
| CEBPE    | -0.16881 | 0.889575 | 4.84     | -4.38947 | 2.99E-05 | 8.30E-05 | 1.836448 |
| HMGB3    | 0.234164 | 1.176225 | 7.033187 | 4.385296 | 3.04E-05 | 8.43E-05 | 1.821283 |

|         |          |          |          |          |          |          |          |
|---------|----------|----------|----------|----------|----------|----------|----------|
| KCNN4   | -0.15399 | 0.898761 | 4.884286 | -4.3845  | 3.05E-05 | 8.45E-05 | 1.818383 |
| IQCC    | -0.17351 | 0.886682 | 5.256154 | -4.38447 | 3.05E-05 | 8.45E-05 | 1.818285 |
| ENDOD1  | 0.267947 | 1.204093 | 6.98011  | 4.384166 | 3.06E-05 | 8.45E-05 | 1.817177 |
| RNASE3  | -0.17797 | 0.883945 | 5.223297 | -4.38383 | 3.06E-05 | 8.46E-05 | 1.815956 |
| SUV39H1 | -0.16286 | 0.893256 | 5.710989 | -4.38327 | 3.07E-05 | 8.48E-05 | 1.81393  |
| SNX27   | -0.13929 | 0.907963 | 7.122857 | -4.38262 | 3.07E-05 | 8.50E-05 | 1.811564 |
| SLC10A2 | -0.50449 | 0.704908 | 8.078352 | -4.38195 | 3.08E-05 | 8.51E-05 | 1.809121 |
| FAM76A  | -0.15924 | 0.895496 | 4.845385 | -4.38099 | 3.09E-05 | 8.54E-05 | 1.805647 |
| PDYN    | -0.14271 | 0.905816 | 4.287473 | -4.37982 | 3.11E-05 | 8.58E-05 | 1.801401 |
| HSD17B4 | 0.168024 | 1.123519 | 9.534176 | 4.378191 | 3.13E-05 | 8.63E-05 | 1.795491 |
| NDC80   | 0.287367 | 1.220411 | 3.853626 | 4.375867 | 3.15E-05 | 8.70E-05 | 1.787059 |
| TPP2    | 0.157329 | 1.11522  | 6.867582 | 4.375186 | 3.16E-05 | 8.72E-05 | 1.784592 |
| TSSK2   | -0.13958 | 0.907784 | 4.55989  | -4.37442 | 3.17E-05 | 8.74E-05 | 1.781827 |
| TRAV8-6 | -0.12828 | 0.914925 | 5.264176 | -4.37305 | 3.19E-05 | 8.79E-05 | 1.77683  |
| VDR     | -0.30721 | 0.808202 | 7.213516 | -4.37265 | 3.19E-05 | 8.80E-05 | 1.775414 |
| NEDD4L  | -0.18834 | 0.877616 | 7.631648 | -4.37252 | 3.19E-05 | 8.80E-05 | 1.77493  |
| TYMS    | 0.38729  | 1.307934 | 7.99956  | 4.372451 | 3.20E-05 | 8.80E-05 | 1.774674 |
| PHIP    | 0.171913 | 1.126551 | 6.841099 | 4.372413 | 3.20E-05 | 8.80E-05 | 1.774537 |
| NR2F2   | 0.200179 | 1.148841 | 7.607033 | 4.372099 | 3.20E-05 | 8.80E-05 | 1.773401 |
| CA10    | -0.23099 | 0.85205  | 4.601209 | -4.37117 | 3.21E-05 | 8.83E-05 | 1.770018 |
| IER2    | -0.44277 | 0.735719 | 9.516264 | -4.37115 | 3.21E-05 | 8.83E-05 | 1.769945 |
| TOMM70A | 0.177019 | 1.130546 | 8.253407 | 4.36958  | 3.23E-05 | 8.88E-05 | 1.764271 |
| PIGF    | 0.218116 | 1.163214 | 7.283077 | 4.36958  | 3.23E-05 | 8.88E-05 | 1.76427  |
| ATOH1   | -0.15687 | 0.896969 | 4.693297 | -4.36943 | 3.23E-05 | 8.88E-05 | 1.763713 |
| NSMF    | -0.21934 | 0.858957 | 6.811099 | -4.36935 | 3.23E-05 | 8.88E-05 | 1.763443 |
| TNMD    | 0.763087 | 1.697118 | 5.156264 | 4.369309 | 3.23E-05 | 8.88E-05 | 1.76329  |
| C9orf91 | 0.164005 | 1.120393 | 4.611319 | 4.368991 | 3.24E-05 | 8.89E-05 | 1.762138 |
| MLH3    | 0.166213 | 1.122109 | 5.901758 | 4.368316 | 3.25E-05 | 8.91E-05 | 1.759691 |
| DPYSL2  | 0.241961 | 1.182599 | 9.447912 | 4.367815 | 3.25E-05 | 8.92E-05 | 1.757875 |
| NRGN    | -0.14756 | 0.902776 | 5.526813 | -4.36723 | 3.26E-05 | 8.94E-05 | 1.755771 |
| DCTN5   | 0.116507 | 1.084107 | 6.98044  | 4.365014 | 3.29E-05 | 9.01E-05 | 1.747734 |
| AXIN1   | -0.14115 | 0.906793 | 7.028242 | -4.36455 | 3.29E-05 | 9.02E-05 | 1.746053 |
| B3GNT3  | -0.19601 | 0.872959 | 6.252418 | -4.36421 | 3.30E-05 | 9.03E-05 | 1.74481  |
| CA14    | -0.19288 | 0.874858 | 5.155055 | -4.36388 | 3.30E-05 | 9.03E-05 | 1.743633 |
| EMC7    | 0.119826 | 1.086604 | 9.191429 | 4.363861 | 3.30E-05 | 9.03E-05 | 1.743559 |
| MSN     | 0.267686 | 1.203875 | 8.508242 | 4.363831 | 3.30E-05 | 9.03E-05 | 1.74345  |
| FOXF1   | -0.1624  | 0.89354  | 4.291868 | -4.36379 | 3.30E-05 | 9.03E-05 | 1.743301 |
| DMTN    | -0.147   | 0.90313  | 7.192527 | -4.36067 | 3.34E-05 | 9.14E-05 | 1.73202  |
| WNT11   | -0.16452 | 0.892224 | 5.685165 | -4.36036 | 3.35E-05 | 9.15E-05 | 1.730879 |
| IDI1    | -0.22506 | 0.855558 | 8.790879 | -4.35904 | 3.36E-05 | 9.19E-05 | 1.726112 |
| C8B     | -0.17914 | 0.883226 | 5.52989  | -4.3581  | 3.37E-05 | 9.22E-05 | 1.722696 |
| CCL20   | 0.917396 | 1.888703 | 5.066484 | 4.357992 | 3.38E-05 | 9.22E-05 | 1.722319 |
| MMP1    | 0.243502 | 1.183863 | 3.738022 | 4.357371 | 3.38E-05 | 9.24E-05 | 1.720074 |
| PDE6D   | 0.130841 | 1.094931 | 7.062527 | 4.355038 | 3.41E-05 | 9.32E-05 | 1.711639 |
| APP     | 0.226734 | 1.170183 | 9.585165 | 4.354966 | 3.41E-05 | 9.32E-05 | 1.711378 |
| CST8    | -0.15008 | 0.901199 | 4.662088 | -4.35416 | 3.42E-05 | 9.34E-05 | 1.708474 |
| SPTBN2  | -0.20327 | 0.868579 | 5.522308 | -4.35274 | 3.44E-05 | 9.39E-05 | 1.70333  |

|          |          |          |          |          |          |          |          |
|----------|----------|----------|----------|----------|----------|----------|----------|
| RANBP6   | 0.262758 | 1.19977  | 6.834066 | 4.3502   | 3.48E-05 | 9.48E-05 | 1.694154 |
| DPEP3    | -0.1528  | 0.899505 | 4.758571 | -4.34985 | 3.48E-05 | 9.49E-05 | 1.692878 |
| ODC1     | 0.201082 | 1.14956  | 10.28813 | 4.349145 | 3.49E-05 | 9.51E-05 | 1.690341 |
| C12orf4  | 0.193662 | 1.143663 | 5.690549 | 4.347844 | 3.51E-05 | 9.55E-05 | 1.685642 |
| CASP8AP2 | 0.167304 | 1.122958 | 5.301429 | 4.34748  | 3.51E-05 | 9.56E-05 | 1.684327 |
| TMPRSS4  | 0.324087 | 1.251872 | 6.544176 | 4.346633 | 3.52E-05 | 9.59E-05 | 1.681271 |
| TMEM260  | 0.185546 | 1.137247 | 6.101319 | 4.345244 | 3.54E-05 | 9.64E-05 | 1.676256 |
| THRB     | -0.17502 | 0.885753 | 6.497363 | -4.34469 | 3.55E-05 | 9.66E-05 | 1.674269 |
| MRAS     | 0.253039 | 1.191714 | 6.301868 | 4.344299 | 3.56E-05 | 9.67E-05 | 1.672844 |
| ZFAND1   | -0.22418 | 0.856082 | 7.771099 | -4.34423 | 3.56E-05 | 9.67E-05 | 1.672585 |
| CRABP2   | -0.20715 | 0.866247 | 6.145824 | -4.34402 | 3.56E-05 | 9.67E-05 | 1.671843 |
| SLN      | -0.15454 | 0.898418 | 5.139231 | -4.34376 | 3.56E-05 | 9.68E-05 | 1.670895 |
| TRMT2B   | -0.18373 | 0.880424 | 6.421319 | -4.34321 | 3.57E-05 | 9.69E-05 | 1.668916 |
| MFSD7    | -0.18818 | 0.87771  | 6.148681 | -4.3431  | 3.57E-05 | 9.70E-05 | 1.668518 |
| RBMX2    | 0.146208 | 1.106657 | 6.501648 | 4.34292  | 3.57E-05 | 9.70E-05 | 1.667867 |
| FHOD3    | 0.301406 | 1.232345 | 7.182308 | 4.342855 | 3.57E-05 | 9.70E-05 | 1.667632 |
| LRRC17   | -0.15709 | 0.896834 | 4.473407 | -4.33997 | 3.61E-05 | 9.80E-05 | 1.657241 |
| CDC73    | 0.159507 | 1.116906 | 6.696703 | 4.339582 | 3.62E-05 | 9.81E-05 | 1.655823 |
| GNG11    | 0.364981 | 1.287864 | 7.834615 | 4.338263 | 3.64E-05 | 9.86E-05 | 1.651066 |
| GOLIM4   | -0.16099 | 0.894411 | 5.885824 | -4.33683 | 3.66E-05 | 9.91E-05 | 1.645917 |
| TBCC     | 0.182957 | 1.135208 | 7.563516 | 4.336801 | 3.66E-05 | 9.91E-05 | 1.645797 |
| OAS1     | 0.560729 | 1.475015 | 6.23011  | 4.336426 | 3.66E-05 | 9.92E-05 | 1.644444 |
| DR1      | 0.155    | 1.113422 | 6.341648 | 4.336039 | 3.67E-05 | 9.93E-05 | 1.643047 |
| PCDHA10  | -0.15599 | 0.897519 | 4.503516 | -4.33596 | 3.67E-05 | 9.93E-05 | 1.642754 |
| HAPLN2   | -0.16986 | 0.888926 | 4.672088 | -4.3356  | 3.67E-05 | 9.94E-05 | 1.641476 |

**Table S2. CKD-Blue enriched geneset**

| <b>NAME</b>                                                                           | <b>SIZE</b> | <b>ES</b>   | <b>NES</b> | <b>NOM p-val</b> | <b>FDR q-val</b> |
|---------------------------------------------------------------------------------------|-------------|-------------|------------|------------------|------------------|
| HALLMARK_INTERFERON_ALPHA_RESPONSE                                                    | 73          | 0.70697904  | 2.401329   | 0                | 0                |
| REACTOME_IMMUNOREGULATORY_INTERACTIONS_BETWEEN_A<br>_LYMPHOID_AND_A_NON_LYMPHOID_CELL | 88          | 0.6503452   | 2.2540326  | 0                | 0                |
| REACTOME_INTERFERON_ALPHA_BETA_SIGNALING                                              | 55          | 0.6127595   | 1.9683331  | 0                | 0.0209609        |
| GO_CELLULAR_DEFENSE_RESPONSE                                                          | 36          | 0.66562515  | 1.9735125  | 0                | 0.02286122       |
| GO_NEGATIVE_REGULATION_OF_VIRAL_GENOME_REPLICATION                                    | 39          | 0.6566933   | 1.9766963  | 0                | 0.02875609       |
| KEGG_TYPE_I_DIABETES_MELLITUS                                                         | 28          | 0.68634254  | 1.9211932  | 0                | 0.03665807       |
| HALLMARK_ALLOGRAFT_REJECTION                                                          | 148         | 0.50134385  | 1.9084237  | 0                | 0.039381754      |
| KEGG_ALLOGRAFT_REJECTION                                                              | 24          | 0.7093952   | 1.893494   | 0                | 0.03938945       |
| REACTOME_ANTIVIRAL_MECHANISM_BY_IFN_STIMULATED_GEN<br>ES                              | 54          | 0.5924195   | 1.8861372  | 0                | 0.040561426      |
| REACTOME_INTERFERON_SIGNALING                                                         | 132         | 0.5130978   | 1.898133   | 0                | 0.041903697      |
| HALLMARK_TNFA_SIGNALING_VIA_NFKB                                                      | 175         | -0.83062816 | -2.7448096 | 0                | 0                |
| HALLMARK_HYPOXIA                                                                      | 153         | -0.69562817 | -2.2672408 | 0                | 0                |
| HALLMARK_UV_RESPONSE_UP                                                               | 116         | -0.70585686 | -2.239725  | 0                | 0                |
| PID_ATF2_PATHWAY                                                                      | 35          | -0.8456175  | -2.2285554 | 0                | 0                |
| HALLMARK_APOPTOSIS                                                                    | 123         | -0.6905139  | -2.172021  | 0                | 2.32E-04         |
| REACTOME_NUCLEAR_EVENTS_KINASE_AND_TRANSCRIPTION_F<br>ACTOR_ACTIVATION                | 35          | -0.81615317 | -2.1120372 | 0                | 2.58E-04         |
| REACTOME_NGF_STIMULATED_TRANSCRIPTION                                                 | 27          | -0.8399939  | -2.1341226 | 0                | 2.91E-04         |
| PID_AP1_PATHWAY                                                                       | 48          | -0.77188134 | -2.1419587 | 0                | 3.32E-04         |
| GO_P38MAPK_CASCADE                                                                    | 27          | -0.8545522  | -2.163108  | 0                | 3.88E-04         |
| GO_REGULATION_OF_EPITHELIAL_CELL_DIFFERENTIATION                                      | 94          | -0.68354857 | -2.0781128 | 0                | 5.79E-04         |
| GO_CELLULAR_RESPONSE_TO_STARVATION                                                    | 84          | -0.69371736 | -2.0881803 | 0                | 6.32E-04         |
| GO_RESPONSE_TO_STARVATION                                                             | 111         | -0.6752055  | -2.0894158 | 0                | 6.95E-04         |
| GO_SKELETAL_MUSCLE_CELL_DIFFERENTIATION                                               | 27          | -0.83449644 | -2.068933  | 0                | 8.00E-04         |
| GO_NEGATIVE_REGULATION_OF_PROTEIN_SERINE_THREONINE_<br>KINASE_ACTIVITY                | 82          | -0.6720453  | -2.044121  | 0                | 0.001239647      |
| PID_SMAD2_3NUCLEAR_PATHWAY                                                            | 49          | -0.7398351  | -2.0355604 | 0                | 0.001618643      |
| GO_FAT_CELL_DIFFERENTIATION                                                           | 121         | -0.6333734  | -2.0297682 | 0                | 0.001803759      |
| GO_NEGATIVE_REGULATION_OF_TRANSFERASE_ACTIVITY                                        | 157         | -0.6236511  | -2.0040205 | 0                | 0.002919317      |
| HALLMARK_IL2_STAT5_SIGNALING                                                          | 137         | -0.62587684 | -2.0053234 | 0                | 0.00295514       |
| GO_MONOSACCHARIDE_BIOSYNTHETIC_PROCESS                                                | 64          | -0.6794318  | -2.007393  | 0                | 0.003128972      |
| GO_MUSCLE_TISSUE_DEVELOPMENT                                                          | 202         | -0.59344834 | -1.9936025 | 0                | 0.003350122      |
| GO_SKELETAL_MUSCLE_ORGAN_DEVELOPMENT                                                  | 75          | -0.67626023 | -1.9874661 | 0                | 0.003901186      |
| REACTOME_THE_CITRIC_ACID_TCA_CYCLE_AND_RESPIRATORY_E<br>LECTRON_TRANSPORT             | 93          | -0.6394663  | -1.9807293 | 0                | 0.004180828      |
| PID_FOXO_PATHWAY                                                                      | 36          | -0.7465937  | -1.9818312 | 0                | 0.004262608      |
| HALLMARK_P53_PATHWAY                                                                  | 148         | -0.6119882  | -1.9832422 | 0                | 0.004350977      |
| PID_IL6_7_PATHWAY                                                                     | 35          | -0.75684047 | -1.9704227 | 0                | 0.005038227      |
| PID_ERBB1_DOWNSTREAM_PATHWAY                                                          | 75          | -0.662648   | -1.9712172 | 0                | 0.005143076      |
| GO_NEGATIVE_REGULATION_OF_KINASE_ACTIVITY                                             | 143         | -0.615533   | -1.9674637 | 0                | 0.005188041      |
| GO_KINASE_INHIBITOR_ACTIVITY                                                          | 38          | -0.7390166  | -1.9668684 | 0                | 0.00520724       |
| HALLMARK_ESTROGEN_RESPONSE_EARLY                                                      | 141         | -0.61476165 | -1.9716511 | 0                | 0.005303158      |
| REACTOME_SIGNALING_BY_NTRKS                                                           | 84          | -0.65229577 | -1.963201  | 0                | 0.0054552        |
| PID_TAP63_PATHWAY                                                                     | 39          | -0.7247743  | -1.9577416 | 0                | 0.006064393      |
| GO_DNA_BINDING_TRANSCRIPTION_FACTOR_BINDING                                           | 198         | -0.58109826 | -1.9538983 | 0                | 0.006561243      |
| HALLMARK_ANDROGEN_RESPONSE                                                            | 74          | -0.6481518  | -1.9421616 | 0                | 0.008386841      |
| GO_NEGATIVE_REGULATION_OF_MAP_KINASE_ACTIVITY                                         | 49          | -0.69819593 | -1.9371995 | 0                | 0.008917522      |
| GO_GLUCOSE_METABOLIC_PROCESS                                                          | 125         | -0.6091817  | -1.9329743 | 0                | 0.009254478      |
| HALLMARK_CHOLESTEROL_HOMEOSTASIS                                                      | 50          | -0.69416386 | -1.9332062 | 0                | 0.009486132      |
| GO_RNA_POLYMERASE_II_SPECIFIC_DNA_BINDING_TRANSCRIPTI<br>ON_FACTOR_BINDING            | 159         | -0.5894504  | -1.9290084 | 0                | 0.009877053      |
| GO_TRANSCRIPTION_FACTOR_BINDING                                                       | 356         | -0.54382837 | -1.9229456 | 0                | 0.010983478      |

|                                                                     |     |             |            |             |             |
|---------------------------------------------------------------------|-----|-------------|------------|-------------|-------------|
| GO_PLATELET_DERIVED_GROWTH_FACTOR_RECEPTOR_SIGNALING_PATHWAY        | 36  | -0.7289513  | -1.9130274 | 0           | 0.012882965 |
| GO_REGULATION_OF_EPIDERMAL_CELL_DIFFERENTIATION                     | 34  | -0.7434667  | -1.9141777 | 0.001631321 | 0.012946786 |
| GO_NEGATIVE_REGULATION_OF_PROTEIN_MODIFICATION_PROCESS              | 343 | -0.5469002  | -1.9013855 | 0           | 0.013005317 |
| GO_PROTEIN_TYROSINE_SERINE_THREONINE_PHOSPHATASE_ACTIVITY           | 21  | -0.79851407 | -1.8996131 | 0           | 0.013020961 |
| HALLMARK_OXIDATIVE_PHOSPHORYLATION                                  | 143 | -0.585117   | -1.8981546 | 0           | 0.013192682 |
| KEGG_MAPK_SIGNALING_PATHWAY                                         | 166 | -0.58063966 | -1.9014492 | 0           | 0.013247353 |
| GO_RESPONSE_TO_CAMP                                                 | 69  | -0.6402604  | -1.8967516 | 0           | 0.013465758 |
| GO_NEGATIVE_REGULATION_OF_MRNA_METABOLIC_PROCESS                    | 38  | -0.7176737  | -1.9016762 | 0           | 0.013498969 |
| GO_NEGATIVE_REGULATION_OF_DNA_BINDING_TRANSCRIPTION_FACTOR_ACTIVITY | 86  | -0.6230947  | -1.9083968 | 0           | 0.013612621 |
| PID_P53_DOWNSTREAM_PATHWAY                                          | 92  | -0.62016773 | -1.9068199 | 0           | 0.013725613 |
| GO_REGULATION_OF_FAT_CELL_DIFFERENTIATION                           | 69  | -0.65297747 | -1.9089084 | 0.001526718 | 0.013746833 |
| GO_CELLULAR_RESPONSE_TO_IONIZING_RADIATION                          | 35  | -0.74278885 | -1.9049602 | 0           | 0.013781395 |
| GO_REGULATION_OF_GLUCOSE_METABOLIC_PROCESS                          | 65  | -0.6576233  | -1.9017991 | 0           | 0.013786182 |
| GO_NUCLEAR_RECEPTOR_BINDING                                         | 61  | -0.65563416 | -1.9038528 | 0.001540832 | 0.013860978 |
| GO_INACTIVATION_OF_MAPK_ACTIVITY                                    | 18  | -0.8054818  | -1.9018669 | 0.001851852 | 0.014060816 |
| GO_CELLULAR_RESPONSE_TO_EXTRACELLULAR_STIMULUS                      | 160 | -0.57528716 | -1.8905765 | 0           | 0.014711431 |
| GO_REGULATION_OF_OSSIFICATION                                       | 101 | -0.60701764 | -1.8880504 | 0           | 0.015095102 |
| GO_CIRCADIAN_RHYTHM                                                 | 121 | -0.59083664 | -1.8834752 | 0           | 0.015106598 |
| GO_EMBRYONIC_PLACENTA_MORPHOGENESIS                                 | 16  | -0.8354626  | -1.8838549 | 0.001912046 | 0.015307354 |
| GO_GTPASE_ACTIVITY                                                  | 168 | -0.57291836 | -1.886213  | 0           | 0.015340773 |
| GO_NEGATIVE_REGULATION_OF_MAPK_CASCADE                              | 104 | -0.6091863  | -1.8838776 | 0           | 0.015575904 |
| GO_POSITIVE_REGULATION_OF_P38MAPK_CASCADE                           | 18  | -0.80663437 | -1.8708954 | 0           | 0.017990027 |
| REACTOME_NEGATIVE_REGULATION_OF_MAPK_PATHWAY                        | 20  | -0.7978409  | -1.8712628 | 0           | 0.018150233 |
| GO_NEGATIVE_REGULATION_OF_PHOSPHORYLATION                           | 267 | -0.5459901  | -1.873349  | 0           | 0.018176721 |
| HALLMARK_TGF_BETA_SIGNALING                                         | 41  | -0.7021484  | -1.8717458 | 0           | 0.01829561  |
| REACTOME_PYRUVATE_METABOLISM_AND_CITRIC_ACID_TCA_CYCLE              | 40  | -0.68700486 | -1.8684243 | 0           | 0.01880626  |
| GO_RESPONSE_TO_THYROID_HORMONE                                      | 20  | -0.8017767  | -1.8661026 | 0           | 0.019262884 |
| HALLMARK_MTORC1_SIGNALING                                           | 150 | -0.57299834 | -1.8585124 | 0           | 0.021235706 |
| GO_CELLULAR_RESPONSE_TO_HORMONE_STIMULUS                            | 411 | -0.52183646 | -1.8593156 | 0           | 0.021276645 |
| GO_PROTEIN_SERINE_THREONINE_KINASE_INHIBITOR_ACTIVITY               | 16  | -0.82539296 | -1.859634  | 0.001876173 | 0.021473186 |
| REACTOME_TOLL_LIKE_RECEPTOR_10_TLR10_CASCADE                        | 39  | -0.69346017 | -1.8598784 | 0.00166113  | 0.021729186 |
| REACTOME_RAF_INDEPENDENT_MAPK1_3_ACTIVATION                         | 17  | -0.8282311  | -1.8564632 | 0           | 0.021870077 |
| REACTOME_RESPONSE_OF_EIF2AK4_GCN2_TO_AMINO_ACID_DEFICIENCY          | 37  | -0.69311905 | -1.8492026 | 0           | 0.025152793 |
| GO_MUSCLE_CELL_PROLIFERATION                                        | 131 | -0.5757095  | -1.8452152 | 0           | 0.026519116 |
| GO_NEGATIVE_REGULATION_OF_PHOSPHORUS_METABOLIC_PROCESS              | 319 | -0.5302398  | -1.842547  | 0           | 0.026641332 |
| GO_POSITIVE_REGULATION_OF_OSSIFICATION                              | 52  | -0.64713603 | -1.842928  | 0.001623377 | 0.026767699 |
| GO_NUCLEAR_HORMONE_RECEPTOR_BINDING                                 | 90  | -0.6052684  | -1.8440144 | 0           | 0.026818251 |
| GO_POSITIVE_REGULATION_OF_OSTEOBLAST_DIFFERENTIATION                | 37  | -0.696446   | -1.8392848 | 0           | 0.027580457 |
| GO_PERK_MEDIATED_UNFOLDED_PROTEIN_RESPONSE                          | 16  | -0.8105782  | -1.8400416 | 0.001855288 | 0.027596964 |
| GO_CELLULAR_RESPONSE_TO_EXTERNAL_STIMULUS                           | 211 | -0.54565525 | -1.8384356 | 0           | 0.02762593  |
| PID_HIF1_TF_PATHWAY                                                 | 53  | -0.6533825  | -1.8369089 | 0.001594896 | 0.02813603  |
| HALLMARK_UNFOLDED_PROTEIN_RESPONSE                                  | 74  | -0.6107912  | -1.8347086 | 0           | 0.028302422 |
| GO_MONOSACCHARIDE_METABOLIC_PROCESS                                 | 172 | -0.55361366 | -1.8359715 | 0           | 0.028331753 |
| GO_RESPONSE_TO_AMINO_ACID_STARVATION                                | 26  | -0.74365324 | -1.8347828 | 0           | 0.028623104 |
| GO_HORMONE_RECEPTOR_BINDING                                         | 104 | -0.5954186  | -1.8303574 | 0           | 0.028928872 |
| GO_CIS_REGULATORY_REGION_BINDING                                    | 308 | -0.5242206  | -1.8306017 | 0           | 0.029093463 |
| REACTOME_RHO_GTPASES_ACTIVATE_ROCKS                                 | 15  | -0.8081595  | -1.8306732 | 0.001828154 | 0.02938482  |
| GO_RESPONSE_TO_PEPTIDE                                              | 318 | -0.5204943  | -1.8311347 | 0           | 0.029503081 |



|                                                                 |     |             |            |             |             |
|-----------------------------------------------------------------|-----|-------------|------------|-------------|-------------|
| GO_INTRINSIC_APOPTOTIC_SIGNALING_PATHWAY                        | 176 | -0.5467616  | -1.8264143 | 0           | 0.030262794 |
| BIOCARTA_KERATINOCYTE_PATHWAY                                   | 35  | -0.69199324 | -1.8268498 | 0           | 0.030385412 |
| REACTOME_PERK_REGULATES_GENE_EXPRESSION                         | 16  | -0.82316774 | -1.8243421 | 0.001964637 | 0.031036165 |
| GO_FACE_DEVELOPMENT                                             | 28  | -0.73653626 | -1.823684  | 0           | 0.031139567 |
| REACTOME_INTERLEUKIN_4_AND_INTERLEUKIN_13_SIGNALING             | 77  | -0.6105357  | -1.820077  | 0.001445087 | 0.031795837 |
| GO_ENDOTHELIAL_CELL_CHEMOTAXIS                                  | 17  | -0.7879509  | -1.8203732 | 0.003731343 | 0.031990863 |
| GO_CELLULAR_RESPONSE_TO_CALCIIUM_ION                            | 47  | -0.657398   | -1.819018  | 0           | 0.03204498  |
| REACTOME_TRANSCRIPTIONAL_REGULATION_OF_GRANULOPOIESIS           | 18  | -0.7906674  | -1.8208548 | 0           | 0.032075346 |
| GO_CIRCADIAN_REGULATION_OF_GENE_EXPRESSION                      | 41  | -0.67421335 | -1.8145554 | 0           | 0.03416801  |
| GO_CORE_PROMOTER_BINDING                                        | 26  | -0.72226983 | -1.8137445 | 0.003636364 | 0.034257933 |
| GO_POSITIVE_REGULATION_OF_FAT_CELL_DIFFERENTIATION              | 32  | -0.71536744 | -1.8116666 | 0.003490401 | 0.034383345 |
| GO_REGULATION_OF_STEROID_BIOSYNTHETIC_PROCESS                   | 66  | -0.62129366 | -1.8111413 | 0.00304414  | 0.034454316 |
| GO_RESPONSE_TO_EXTRACELLULAR_STIMULUS                           | 325 | -0.5165384  | -1.8120238 | 0           | 0.034510065 |
| GO_REGULATION_OF_KERATINOCYTE_DIFFERENTIATION                   | 19  | -0.7715206  | -1.8104521 | 0.001821494 | 0.034546785 |
| GO_RESPONSE_TO_COLD                                             | 33  | -0.6943842  | -1.808575  | 0.001748252 | 0.0346486   |
| GO_RESPONSE_TO_PEPTIDE_HORMONE                                  | 268 | -0.5290487  | -1.8124175 | 0           | 0.0346754   |
| PID_REG_GR_PATHWAY                                              | 51  | -0.6431772  | -1.809151  | 0           | 0.034682527 |
| REACTOME_ESTROGEN_DEPENDENT_GENE_EXPRESSION                     | 52  | -0.6488219  | -1.8095019 | 0           | 0.034740023 |
| GO_REGULATION_OF_STEROID_METABOLIC_PROCESS                      | 84  | -0.5957946  | -1.8023158 | 0.00141844  | 0.037416242 |
| PID_MTOR_4PATHWAY                                               | 47  | -0.6597635  | -1.8028271 | 0.001628664 | 0.037453786 |
| GO_MRNA_3_UTR_BINDING                                           | 43  | -0.6682957  | -1.8015141 | 0.001620746 | 0.037639655 |
| GO_KETONE_BIOSYNTHETIC_PROCESS                                  | 30  | -0.71884555 | -1.7998961 | 0.001776199 | 0.037784018 |
| GO_CORE_PROMOTER_SEQUENCE_SPECIFIC_DNA_BINDING                  | 19  | -0.7724514  | -1.7990643 | 0           | 0.03786039  |
| GO_REGULATION_OF_CELLULAR_CARBOHYDRATE_METABOLIC_PROCESS        | 82  | -0.6041915  | -1.8002603 | 0           | 0.03799553  |
| REACTOME_FOXO_MEDIATED_TRANSCRIPTION                            | 43  | -0.66676396 | -1.7980205 | 0           | 0.038141947 |
| GO_REGULATION_OF_MAP_KINASE_ACTIVITY                            | 198 | -0.53645825 | -1.7971041 | 0           | 0.038315    |
| PID_S1P_S1P2_PATHWAY                                            | 18  | -0.7886778  | -1.7955271 | 0.007259528 | 0.038750347 |
| REACTOME_UNFOLDED_PROTEIN_RESPONSE_UPR                          | 55  | -0.64547247 | -1.79435   | 0           | 0.03915964  |
| GO_BROWN_FAT_CELL_DIFFERENTIATION                               | 26  | -0.72054094 | -1.7922918 | 0.003669725 | 0.03986524  |
| GO_NEGATIVE_REGULATION_OF_INTRINSIC_APOPTOTIC_SIGNALING_PATHWAY | 61  | -0.6167787  | -1.7927958 | 0           | 0.03989101  |
| PID_IL3_PATHWAY                                                 | 16  | -0.7988491  | -1.7888    | 0           | 0.041752513 |
| GO_REGULATION_OF_HEART_GROWTH                                   | 44  | -0.6434592  | -1.7808244 | 0           | 0.046851072 |
| REACTOME_PYRUVATE_METABOLISM                                    | 22  | -0.7370138  | -1.779453  | 0.005681818 | 0.047051936 |
| PID_NOTCH_PATHWAY                                               | 29  | -0.7192823  | -1.7797679 | 0           | 0.047195192 |
| REACTOME_TOLL_LIKE_RECEPTOR_TLR1_TLR2_CASCADE                   | 48  | -0.63790137 | -1.7782223 | 0           | 0.047578283 |
| REACTOME_RESPIRATORY_ELECTRON_TRANSPORT                         | 54  | -0.63224    | -1.7744325 | 0           | 0.04986309  |

**Table S2. CKD-Gold enriched geneset**

| <b>NAME</b>                                                                                                                          | <b>SIZE</b> | <b>ES</b>  | <b>NES</b> | <b>NOM p-val</b> | <b>FDR q-val</b> |
|--------------------------------------------------------------------------------------------------------------------------------------|-------------|------------|------------|------------------|------------------|
| HALLMARK_INTERFERON_GAMMA_RESPONSE                                                                                                   | 158         | 0.72248185 | 2.7589803  | 0                | 0                |
| HALLMARK_ALLOGRAFT_REJECTION                                                                                                         | 148         | 0.71396226 | 2.7121916  | 0                | 0                |
| HALLMARK_INTERFERON_ALPHA_RESPONSE                                                                                                   | 73          | 0.77763826 | 2.638582   | 0                | 0                |
| REACTOME_INTERFERON_SIGNALING                                                                                                        | 132         | 0.68524617 | 2.5763793  | 0                | 0                |
| REACTOME_IMMUNOREGULATORY_INTERACTIONS_BETWEEN_A_L<br>YMPHOID_AND_A_NON_LYMPHOID_CELL                                                | 88          | 0.721665   | 2.5371282  | 0                | 0                |
| REACTOME_INTERFERON_ALPHA_BETA_SIGNALING                                                                                             | 55          | 0.7552968  | 2.4802504  | 0                | 0                |
| GO_B_CELL_MEDIATED_IMMUNITY                                                                                                          | 94          | 0.68875885 | 2.468712   | 0                | 0                |
| GO_ADAPTIVE_IMMUNE_RESPONSE                                                                                                          | 283         | 0.5946575  | 2.3951645  | 0                | 0                |
| GO_ACTIVATION_OF_IMMUNE_RESPONSE                                                                                                     | 402         | 0.56711304 | 2.3847802  | 0                | 0                |
| REACTOME_INTEGRIN_CELL_SURFACE_INTERACTIONS                                                                                          | 65          | 0.7085641  | 2.371726   | 0                | 0                |
| GO_LYMPHOCYTE_MEDIATED_IMMUNITY                                                                                                      | 178         | 0.6122509  | 2.3692725  | 0                | 0                |
| KEGG_CELL_ADHESION_MOLECULES_CAMS                                                                                                    | 94          | 0.65757346 | 2.3681655  | 0                | 0                |
| REACTOME_INTERFERON_GAMMA_SIGNALING                                                                                                  | 61          | 0.7121832  | 2.3598552  | 0                | 0                |
| GO_IMMUNE_RESPONSE_REGULATING_CELL_SURFACE_RECEPTOR_<br>SIGNALING_PATHWAY                                                            | 262         | 0.5836106  | 2.359081   | 0                | 0                |
| GO_ADAPTIVE_IMMUNE_RESPONSE_BASED_ON_SOMATIC_RECOM<br>BINATION_OF_IMMUNE_RECEPTORS_BUILT_FROM_IMMUNOGLOB<br>ULIN_SUPERFAMILY_DOMAINS | 181         | 0.59985775 | 2.3533556  | 0                | 0                |
| KEGG_SYSTEMIC_LUPUS_ERYTHEMATOSUS                                                                                                    | 37          | 0.77003413 | 2.3486228  | 0                | 0                |
| KEGG_VIRAL_MYOCARDITIS                                                                                                               | 51          | 0.7261803  | 2.3374794  | 0                | 0                |
| GO_PHAGOCYTOSIS                                                                                                                      | 190         | 0.59491885 | 2.3340962  | 0                | 0                |
| GO_CYTOKINE_MEDIATED_SIGNALING_PATHWAY                                                                                               | 483         | 0.5421821  | 2.329726   | 0                | 0                |
| GO_HUMORAL_IMMUNE_RESPONSE_MEDIATED_BY_CIRCULATING_<br>IMMUNOGLOBULIN                                                                | 53          | 0.71120507 | 2.3203897  | 0                | 0                |
| GO_INTERFERON_GAMMA_MEDIATED_SIGNALING_PATHWAY                                                                                       | 59          | 0.70186967 | 2.3080623  | 0                | 0                |
| GO_RESPONSE_TO_TYPE_I_INTERFERON                                                                                                     | 67          | 0.6813517  | 2.3062305  | 0                | 0                |
| GO_ANTIGEN_RECEPTOR_MEDIATED_SIGNALING_PATHWAY                                                                                       | 165         | 0.6001997  | 2.3048716  | 0                | 0                |
| GO_EXTRACELLULAR_MATRIX_STRUCTURAL_CONSTITUENT                                                                                       | 103         | 0.63823676 | 2.3024452  | 0                | 0                |
| GO_LEUKOCYTE_PROLIFERATION                                                                                                           | 189         | 0.5856273  | 2.2867763  | 0                | 0                |
| GO_RESPONSE_TO_INTERFERON_GAMMA                                                                                                      | 128         | 0.61133206 | 2.2828174  | 0                | 0                |
| GO_IMMUNE_RESPONSE_REGULATING_SIGNALING_PATHWAY                                                                                      | 365         | 0.547853   | 2.271127   | 0                | 0                |
| GO_REGULATION_OF_LEUKOCYTE_PROLIFERATION                                                                                             | 138         | 0.60507023 | 2.2657256  | 0                | 0                |
| GO_POSITIVE_REGULATION_OF_CELL_ACTIVATION                                                                                            | 222         | 0.5638499  | 2.2610543  | 0                | 0                |
| GO_PHAGOCYTIC_VESICLE                                                                                                                | 86          | 0.6434419  | 2.2501915  | 0                | 0                |
| GO_REGULATION_OF_RESPONSE_TO_CYTOKINE_STIMULUS                                                                                       | 110         | 0.6202597  | 2.2481072  | 0                | 0                |
| GO_POSITIVE_REGULATION_OF_TUMOR_NECROSIS_FACTOR_SUPER<br>FAMILY_CYTOKINE_PRODUCTION                                                  | 57          | 0.6782891  | 2.247096   | 0                | 0                |
| GO_B_CELL_RECEPTOR_SIGNALING_PATHWAY                                                                                                 | 48          | 0.7162396  | 2.2436428  | 0                | 0                |
| GO_MEMBRANE_INVAGINATION                                                                                                             | 56          | 0.68579096 | 2.2381368  | 0                | 0                |
| GO_HUMORAL_IMMUNE_RESPONSE                                                                                                           | 163         | 0.5861149  | 2.2359755  | 0                | 0                |
| REACTOME_ECM_PROTEOGLYCANS                                                                                                           | 50          | 0.6859998  | 2.234548   | 0                | 0                |
| KEGG_LEISHMANIA_INFECTION                                                                                                            | 42          | 0.72038966 | 2.2193074  | 0                | 0                |
| HALLMARK_INFLAMMATORY_RESPONSE                                                                                                       | 156         | 0.5809337  | 2.2176056  | 0                | 0                |
| GO_NEGATIVE_REGULATION_OF_VIRAL_GENOME_REPLICATION                                                                                   | 39          | 0.72393405 | 2.2168684  | 0                | 0                |
| GO_POSITIVE_REGULATION_OF_LEUKOCYTE_PROLIFERATION                                                                                    | 85          | 0.6312752  | 2.215714   | 0                | 0                |
| KEGG_ANTIGEN_PROCESSING_AND_PRESENTATION                                                                                             | 57          | 0.6785498  | 2.2115698  | 0                | 0                |
| KEGG_ALLOGRAFT_REJECTION                                                                                                             | 24          | 0.8130395  | 2.2059782  | 0                | 0                |
| KEGG_ECM_RECEPTOR_INTERACTION                                                                                                        | 59          | 0.6697777  | 2.2059617  | 0                | 0                |

|                                                                           |     |            |           |   |   |
|---------------------------------------------------------------------------|-----|------------|-----------|---|---|
| GO_TUMOR_NECROSIS_FACTOR_SUPERFAMILY_CYTOKINE_PRODUC<br>TION              | 97  | 0.6119537  | 2.2045088 | 0 | 0 |
| GO_POSITIVE_REGULATION_OF_CYTOKINE_BIOSYNTHETIC_PROCES<br>S               | 40  | 0.7172684  | 2.2031846 | 0 | 0 |
| REACTOME_TCR_SIGNALING                                                    | 73  | 0.63900286 | 2.1990075 | 0 | 0 |
| GO_POSITIVE_REGULATION_OF_T_CELL_PROLIFERATION                            | 59  | 0.65837723 | 2.197328  | 0 | 0 |
| KEGG_AUTOIMMUNE_THYROID_DISEASE                                           | 33  | 0.7461788  | 2.1942272 | 0 | 0 |
| REACTOME_ANTIVIRAL_MECHANISM_BY_IFN_STIMULATED_GENES                      | 54  | 0.6732106  | 2.1888206 | 0 | 0 |
| KEGG_GRAFT_VERSUS_HOST_DISEASE                                            | 28  | 0.76720786 | 2.1845777 | 0 | 0 |
| GO_RESPONSE_TO_INTERFERON_BETA                                            | 21  | 0.8094829  | 2.1827152 | 0 | 0 |
| GO_REGULATION_OF_ADAPTIVE_IMMUNE_RESPONSE                                 | 99  | 0.606733   | 2.1768272 | 0 | 0 |
| GO_ORGANIC_ACID_CATABOLIC_PROCESS                                         | 190 | -0.7486109 | -2.989512 | 0 | 0 |
| GO_MONOCARBOXYLIC_ACID_CATABOLIC_PROCESS                                  | 89  | -0.7941556 | -2.828716 | 0 | 0 |
| GO_SMALL_MOLECULE_CATABOLIC_PROCESS                                       | 296 | -0.6835396 | -2.827341 | 0 | 0 |
| GO_MITOCHONDRIAL_MATRIX                                                   | 283 | -0.6732215 | -2.774104 | 0 | 0 |
| GO_CELLULAR_AMINO_ACID_CATABOLIC_PROCESS                                  | 89  | -0.7722317 | -2.753503 | 0 | 0 |
| HALLMARK_OXIDATIVE_PHOSPHORYLATION                                        | 143 | -0.7195928 | -2.749675 | 0 | 0 |
| GO_FATTY_ACID_CATABOLIC_PROCESS                                           | 73  | -0.7921725 | -2.737742 | 0 | 0 |
| GO_ALPHA_AMINO_ACID_METABOLIC_PROCESS                                     | 130 | -0.712034  | -2.698991 | 0 | 0 |
| GO_ALPHA_AMINO_ACID_CATABOLIC_PROCESS                                     | 72  | -0.7733498 | -2.670438 | 0 | 0 |
| GO_FATTY_ACID_BETA_OXIDATION                                              | 54  | -0.7927936 | -2.655567 | 0 | 0 |
| GO_LIPID_OXIDATION                                                        | 77  | -0.7565406 | -2.639187 | 0 | 0 |
| GO_COENZYME_BINDING                                                       | 213 | -0.6502039 | -2.599875 | 0 | 0 |
| REACTOME_PROTEIN_LOCALIZATION                                             | 97  | -0.7045046 | -2.570181 | 0 | 0 |
| GO_COFACTOR_BINDING                                                       | 345 | -0.6018902 | -2.540683 | 0 | 0 |
| GO_CELLULAR_RESPIRATION                                                   | 101 | -0.6950992 | -2.536949 | 0 | 0 |
| GO_CELLULAR_AMINO_ACID_METABOLIC_PROCESS                                  | 203 | -0.6376154 | -2.528089 | 0 | 0 |
| KEGG_VALINE_LEUCINE_AND_ISOLEUCINE_DEGRADATION                            | 38  | -0.8146973 | -2.527015 | 0 | 0 |
| REACTOME_THE_CITRIC_ACID_TCA_CYCLE_AND_RESPIRATORY_ELE<br>CTRON_TRANSPORT | 93  | -0.696444  | -2.512391 | 0 | 0 |
| GO_MITOCHONDRIAL_PROTEIN_COMPLEX                                          | 120 | -0.6629022 | -2.481446 | 0 | 0 |
| REACTOME_RESPIRATORY_ELECTRON_TRANSPORT                                   | 54  | -0.7404892 | -2.439099 | 0 | 0 |
| GO_CELLULAR_LIPID_CATABOLIC_PROCESS                                       | 137 | -0.6406441 | -2.435594 | 0 | 0 |
| REACTOME_MITOCHONDRIAL_FATTY_ACID_BETA_OXIDATION                          | 24  | -0.8526335 | -2.416459 | 0 | 0 |
| GO_COENZYME_METABOLIC_PROCESS                                             | 160 | -0.6320059 | -2.405803 | 0 | 0 |
| GO_LIPID_MODIFICATION                                                     | 145 | -0.6326164 | -2.403342 | 0 | 0 |
| GO_INNER_MITOCHONDRIAL_MEMBRANE_PROTEIN_COMPLEX                           | 51  | -0.7402148 | -2.386925 | 0 | 0 |
| GO_OXIDOREDUCTASE_ACTIVITY                                                | 455 | -0.5554379 | -2.375537 | 0 | 0 |
| GO_MICROBODY                                                              | 84  | -0.6618079 | -2.365251 | 0 | 0 |
| KEGG_PEROXISOME                                                           | 60  | -0.6964842 | -2.357178 | 0 | 0 |
| GO_DICARBOXYLIC_ACID_METABOLIC_PROCESS                                    | 61  | -0.7058827 | -2.356236 | 0 | 0 |
| GO_COFACTOR_METABOLIC_PROCESS                                             | 281 | -0.5711477 | -2.35424  | 0 | 0 |
| GO_MICROBODY_LUMEN                                                        | 34  | -0.7851597 | -2.349446 | 0 | 0 |
| KEGG_FATTY_ACID_METABOLISM                                                | 33  | -0.7949361 | -2.348957 | 0 | 0 |
| KEGG_BUTANOATE_METABOLISM                                                 | 29  | -0.8034571 | -2.347224 | 0 | 0 |
| REACTOME_PEROXISOMAL_PROTEIN_IMPORT                                       | 45  | -0.7470961 | -2.340099 | 0 | 0 |
| GO_AEROBIC_RESPIRATION                                                    | 52  | -0.7206347 | -2.337018 | 0 | 0 |
| KEGG_ARGININE_AND_PROLINE_METABOLISM                                      | 41  | -0.7508987 | -2.335903 | 0 | 0 |
| GO_MITOCHONDRIAL_GENE_EXPRESSION                                          | 85  | -0.6488451 | -2.333363 | 0 | 0 |
| GO_RESPIRATORY_CHAIN_COMPLEX                                              | 37  | -0.7661789 | -2.331075 | 0 | 0 |

|                                                                                                                                   |     |            |           |   |          |
|-----------------------------------------------------------------------------------------------------------------------------------|-----|------------|-----------|---|----------|
| REACTOME_RESPIRATORY_ELECTRON_TRANSPORT_ATP_SYNTHESIS<br>_BY_CHEMIOSMOTIC_COUPLING_AND_HEAT_PRODUCTION_BY_UN<br>COUPLING_PROTEINS | 55  | -0.7018408 | -2.316378 | 0 | 0        |
| HALLMARK_FATTY_ACID_METABOLISM                                                                                                    | 125 | -0.6209004 | -2.315157 | 0 | 0        |
| GO_PEROXISOMAL_TRANSPORT                                                                                                          | 50  | -0.7156619 | -2.314535 | 0 | 0        |
| GO_RESPIRASOME                                                                                                                    | 48  | -0.7095763 | -2.308672 | 0 | 0        |
| GO_MITOCHONDRIAL_RESPIRATORY_CHAIN_COMPLEX_ASSEMBLY                                                                               | 40  | -0.7413091 | -2.300767 | 0 | 0        |
| GO_ELECTRON_TRANSPORT_CHAIN                                                                                                       | 108 | -0.6257538 | -2.300532 | 0 | 0        |
| GO_RESPIRATORY_ELECTRON_TRANSPORT_CHAIN                                                                                           | 57  | -0.6922551 | -2.290569 | 0 | 0        |
| HALLMARK_XENOBIOTIC_METABOLISM                                                                                                    | 169 | -0.5940884 | -2.287118 | 0 | 0        |
| GO_ENERGY_DERIVATION_BY_OXIDATION_OF_ORGANIC_COMPOUNDS                                                                            | 160 | -0.599901  | -2.285412 | 0 | 0        |
| REACTOME_BRANCHED_CHAIN_AMINO_ACID_CATABOLISM                                                                                     | 19  | -0.8759688 | -2.280634 | 0 | 0        |
| GO_PEROXISOME_ORGANIZATION                                                                                                        | 57  | -0.6868153 | -2.279625 | 0 | 0        |
| REACTOME_SULFUR_AMINO_ACID_METABOLISM                                                                                             | 20  | -0.8420649 | -2.276723 | 0 | 0        |
| KEGG_TRYPTOPHAN_METABOLISM                                                                                                        | 30  | -0.779476  | -2.274525 | 0 | 0        |
| GO_CELLULAR_MODIFIED_AMINO_ACID_METABOLIC_PROCESS                                                                                 | 120 | -0.6139822 | -2.266874 | 0 | 0        |
| REACTOME_GLUCCONEOGENESIS                                                                                                         | 26  | -0.8018687 | -2.26687  | 0 | 0        |
| GO_MITOCHONDRIAL_ENVELOPE                                                                                                         | 364 | -0.5409133 | -2.260006 | 0 | 0        |
| HALLMARK_ADIPOGENESIS                                                                                                             | 143 | -0.5856509 | -2.255389 | 0 | 0        |
| GO_SULFUR_COMPOUND_METABOLIC_PROCESS                                                                                              | 235 | -0.5576224 | -2.24919  | 0 | 0        |
| GO_OXIDOREDUCTASE_ACTIVITY_ACTING_ON_THE_CH_CH_GROUP<br>_OF_DONORS                                                                | 40  | -0.6958904 | -2.170412 | 0 | 8.85E-06 |
| GO_NADH_DEHYDROGENASE_COMPLEX_ASSEMBLY                                                                                            | 31  | -0.7467698 | -2.173984 | 0 | 8.97E-06 |
| GO_WATER_SOLUBLE_VITAMIN_METABOLIC_PROCESS                                                                                        | 54  | -0.6560282 | -2.174612 | 0 | 9.08E-06 |
| KEGG_OXIDATIVE_PHOSPHORYLATION                                                                                                    | 63  | -0.6465343 | -2.179238 | 0 | 9.20E-06 |
| KEGG_GLYCINE_SERINE_AND_THREONINE_METABOLISM                                                                                      | 24  | -0.7881349 | -2.181455 | 0 | 9.32E-06 |
| REACTOME_GLYOXYLATE_METABOLISM_AND_GLYCINE_DEGRADATION                                                                            | 26  | -0.7760737 | -2.182416 | 0 | 9.45E-06 |
| REACTOME_PYRUVATE_METABOLISM_AND_CITRIC_ACID_TCA_CYCLE                                                                            | 40  | -0.7043501 | -2.184156 | 0 | 9.58E-06 |
| GO_LIPID_CATABOLIC_PROCESS                                                                                                        | 194 | -0.5525947 | -2.185464 | 0 | 9.71E-06 |
| GO_MITOCHONDRIAL_ELECTRON_TRANSPORT_NADH_TO_UBIQUINONE                                                                            | 31  | -0.7457333 | -2.18938  | 0 | 9.85E-06 |
| GO_DRUG_METABOLIC_PROCESS                                                                                                         | 377 | -0.5204105 | -2.193111 | 0 | 9.99E-06 |
| GO_FATTY_ACID_METABOLIC_PROCESS                                                                                                   | 238 | -0.5420886 | -2.195032 | 0 | 1.01E-05 |
| GO_BRANCHED_CHAIN_AMINO_ACID_METABOLIC_PROCESS                                                                                    | 18  | -0.8692683 | -2.196108 | 0 | 1.03E-05 |
| GO_MITOCHONDRIAL_TRANSLATION                                                                                                      | 71  | -0.6512105 | -2.209394 | 0 | 1.04E-05 |
| GO_FLAVIN_ADENINE_DINUCLEOTIDE_BINDING                                                                                            | 63  | -0.6578865 | -2.221233 | 0 | 1.06E-05 |
| GO_GENERATION_OF_PRECURSOR_METABOLITES_AND_ENERGY                                                                                 | 313 | -0.5307103 | -2.226903 | 0 | 1.08E-05 |
| REACTOME_METABOLISM_OF_AMINO_ACIDS_AND_DERIVATIVES                                                                                | 215 | -0.5616351 | -2.227199 | 0 | 1.09E-05 |
| GO_XENOBIOTIC_METABOLIC_PROCESS                                                                                                   | 80  | -0.631865  | -2.228262 | 0 | 1.11E-05 |
| GO_SULFUR_AMINO_ACID_METABOLIC_PROCESS                                                                                            | 26  | -0.7961816 | -2.235969 | 0 | 1.13E-05 |
| GO_ORGANELLE_INNER_MEMBRANE                                                                                                       | 250 | -0.5525092 | -2.241343 | 0 | 1.15E-05 |
| KEGG_CITRATE_CYCLE_TCA_CYCLE                                                                                                      | 26  | -0.7958706 | -2.241673 | 0 | 1.17E-05 |
| GO ASPARTATE_FAMILY_AMINO_ACID_METABOLIC_PROCESS                                                                                  | 34  | -0.7480921 | -2.241683 | 0 | 1.19E-05 |
| KEGG_PROPANOATE_METABOLISM                                                                                                        | 24  | -0.8130571 | -2.242377 | 0 | 1.21E-05 |
| GO_VITAMIN_BINDING                                                                                                                | 87  | -0.63441   | -2.247405 | 0 | 1.23E-05 |
| GO_REGULATION_OF_B_CELL_ACTIVATION                                                                                                | 83  | 0.6190978  | 2.1717718 | 0 | 2.35E-05 |

|                                                                                          |     |            |           |   |          |
|------------------------------------------------------------------------------------------|-----|------------|-----------|---|----------|
| GO_CYTOKINE_PRODUCTION                                                                   | 473 | 0.5118066  | 2.1733425 | 0 | 2.40E-05 |
| KEGG_BETA_ALANINE_METABOLISM                                                             | 18  | -0.8350814 | -2.153786 | 0 | 2.47E-05 |
| REACTOME_NUCLEAR_RECEPTOR_TRANSCRIPTION_PATHWAY                                          | 31  | -0.7233114 | -2.154029 | 0 | 2.50E-05 |
| GO_NADH_DEHYDROGENASE_COMPLEX                                                            | 26  | -0.7531539 | -2.154314 | 0 | 2.53E-05 |
| REACTOME_BIOLOGICAL_OXIDATIONS                                                           | 130 | -0.5729873 | -2.158347 | 0 | 2.56E-05 |
| GO_ATP_SYNTHESIS_COUPLED_ELECTRON_TRANSPORT                                              | 48  | -0.6663019 | -2.160417 | 0 | 2.59E-05 |
| GO_MONOCARBOXYLIC_ACID_METABOLIC_PROCESS                                                 | 403 | -0.5096181 | -2.162393 | 0 | 2.63E-05 |
| GO_OXIDOREDUCTASE_ACTIVITY_ACTING_ON_NAD_P_H_QUINONE<br>_OR_SIMILAR_COMPOUND_AS_ACCEPTOR | 35  | -0.7034621 | -2.138901 | 0 | 3.08E-05 |
| REACTOME_COMPLEX_I_BIOGENESIS                                                            | 30  | -0.7426813 | -2.141709 | 0 | 3.12E-05 |
| KEGG_LYSINE_DEGRADATION                                                                  | 29  | -0.7456541 | -2.143954 | 0 | 3.15E-05 |
| REACTOME_PHASE_I_FUNCTIONALIZATION_OF_COMPOUNDS                                          | 69  | -0.6318396 | -2.145784 | 0 | 3.19E-05 |
| REACTOME_PEROXISOMAL_LIPID_METABOLISM                                                    | 19  | -0.8160441 | -2.148363 | 0 | 3.23E-05 |
| GO_DRUG_CATABOLIC_PROCESS                                                                | 94  | -0.5878354 | -2.132867 | 0 | 3.74E-05 |
| GO_HYDRO_LYASE_ACTIVITY                                                                  | 33  | -0.6943777 | -2.133658 | 0 | 3.78E-05 |
| GO_THIOESTER_METABOLIC_PROCESS                                                           | 68  | -0.6320365 | -2.136775 | 0 | 3.83E-05 |
| REACTOME_MITOCHONDRIAL_TRANSLATION                                                       | 47  | -0.6676238 | -2.117025 | 0 | 4.30E-05 |
| GO_ORGANIC_ACID_TRANSMEMBRANE_TRANSPORTER_ACTIVITY                                       | 78  | -0.5971049 | -2.117777 | 0 | 4.35E-05 |
| GO_TRICARBOXYLIC_ACID_CYCLE                                                              | 26  | -0.7577686 | -2.121675 | 0 | 4.39E-05 |
| GO_CELLULAR_AMINO_ACID_BIOSYNTHETIC_PROCESS                                              | 53  | -0.6446444 | -2.125155 | 0 | 4.44E-05 |
| REACTOME_FATTY_ACID_METABOLISM                                                           | 116 | -0.5752508 | -2.11504  | 0 | 4.96E-05 |
| HALLMARK_BILE_ACID_METABOLISM                                                            | 81  | -0.6027807 | -2.11139  | 0 | 5.55E-05 |
| GO_GLUCOSE_METABOLIC_PROCESS                                                             | 125 | -0.5581976 | -2.113277 | 0 | 5.61E-05 |
| GO_CELLULAR_ALDEHYDE_METABOLIC_PROCESS                                                   | 44  | -0.6642549 | -2.107485 | 0 | 6.20E-05 |
| GO_AROMATIC_AMINO_ACID_FAMILY_METABOLIC_PROCESS                                          | 22  | -0.760559  | -2.104193 | 0 | 6.82E-05 |
| GO_VITAMIN_METABOLIC_PROCESS                                                             | 87  | -0.5898089 | -2.102827 | 0 | 7.44E-05 |
| GO_REGULATION_OF_PHAGOCYTOSIS                                                            | 62  | 0.65082866 | 2.1468284 | 0 | 7.47E-05 |
| HALLMARK_IL6_JAK_STAT3_SIGNALING                                                         | 70  | 0.6342547  | 2.1485069 | 0 | 7.58E-05 |
| REACTOME_EXTRACELLULAR_MATRIX_ORGANIZATION                                               | 193 | 0.5483118  | 2.1508996 | 0 | 7.69E-05 |
| GO_CELL_SUBSTRATE_JUNCTION                                                               | 281 | 0.5274285  | 2.1525497 | 0 | 7.81E-05 |
| REACTOME_ANTIGEN_PROCESSING_CROSS_PRESENTATION                                           | 67  | 0.6423929  | 2.1530993 | 0 | 7.93E-05 |
| GO_POSITIVE_REGULATION_OF_LEUKOCYTE_CELL_CELL_ADHESION                                   | 146 | 0.5792788  | 2.1532602 | 0 | 8.05E-05 |
| GO_NEGATIVE_REGULATION_OF_LEUKOCYTE_MEDIATED_IMMUNIT<br>Y                                | 37  | 0.7183214  | 2.1553903 | 0 | 8.18E-05 |
| GO_B_CELL_ACTIVATION                                                                     | 147 | 0.565624   | 2.1558044 | 0 | 8.31E-05 |
| GO_LYMPHOCYTE_ACTIVATION                                                                 | 410 | 0.5129904  | 2.1570787 | 0 | 8.45E-05 |
| GO_REGULATION_OF_LYMPHOCYTE_ACTIVATION                                                   | 272 | 0.53153    | 2.1579664 | 0 | 8.59E-05 |
| GO_COMPLEMENT_ACTIVATION                                                                 | 69  | 0.6262067  | 2.1350532 | 0 | 8.72E-05 |
| KEGG_TYPE_I_DIABETES_MELLITUS                                                            | 28  | 0.7584741  | 2.1591837 | 0 | 8.74E-05 |
| GO_REGULATION_OF_IMMUNE_EFFECTOR_PROCESS                                                 | 267 | 0.5283779  | 2.135166  | 0 | 8.84E-05 |
| GO_ANTIGEN_BINDING                                                                       | 55  | 0.6669835  | 2.1606731 | 0 | 8.89E-05 |
| GO_NUCLEAR_TRANSCRIBED_MRNA_CATABOLIC_PROCESS_NONSE<br>NSE_MEDIATED_DECAY                | 47  | 0.67593753 | 2.1371515 | 0 | 8.96E-05 |
| GO_POSITIVE_REGULATION_OF_CYTOKINE_PRODUCTION                                            | 275 | 0.53089476 | 2.162929  | 0 | 9.04E-05 |
| KEGG_INTESTINAL_IMMUNE_NETWORK_FOR_IGA_PRODUCTION                                        | 26  | 0.7668281  | 2.1415234 | 0 | 9.09E-05 |
| GO_LEUKOCYTE_CELL_CELL_ADHESION                                                          | 223 | 0.5414095  | 2.1651022 | 0 | 9.20E-05 |
| REACTOME_GENERATION_OF_SECOND_MESSENGER_MOLECULES                                        | 26  | 0.7641959  | 2.1433682 | 0 | 9.22E-05 |
| GO_REGULATION_OF_VIRAL_GENOME_REPLICATION                                                | 58  | 0.66424596 | 2.1684613 | 0 | 9.37E-05 |

|                                                                      |     |            |           |            |          |
|----------------------------------------------------------------------|-----|------------|-----------|------------|----------|
| BIOCARTA_CASPASE_PATHWAY                                             | 19  | 0.8177482  | 2.129408  | 0.00203252 | 1.03E-04 |
| GO_SERINE_FAMILY_AMINO_ACID_METABOLIC_PROCESS                        | 26  | -0.7554327 | -2.088206 | 0          | 1.07E-04 |
| KEGG_PPAR_SIGNALING_PATHWAY                                          | 48  | -0.6449691 | -2.089534 | 0          | 1.08E-04 |
| PID_INTEGRIN1_PATHWAY                                                | 52  | 0.649067   | 2.1111507 | 0          | 1.10E-04 |
| HALLMARK_EPITHELIAL_MESENCHYMAL_TRANSITION                           | 168 | 0.5511911  | 2.1155632 | 0          | 1.11E-04 |
| REACTOME_SRP_DEPENDENT_COTRANSLATIONAL_PROTEIN_TARGETING_TO_MEMBRANE | 47  | 0.67011404 | 2.1163058 | 0          | 1.12E-04 |
| REACTOME_NON_INTEGRIN_MEMBRANE_ECM_INTERACTIONS                      | 43  | 0.677785   | 2.119221  | 0          | 1.14E-04 |
| PID_INTEGRIN3_PATHWAY                                                | 34  | 0.7127371  | 2.1231484 | 0          | 1.15E-04 |
| GO_REGULATION_OF_MULTI_ORGANISM_PROCESS                              | 450 | 0.5010253  | 2.1236856 | 0          | 1.17E-04 |
| GO_ELECTRON_TRANSFER_ACTIVITY                                        | 74  | -0.6121476 | -2.085407 | 0          | 1.18E-04 |
| GO_NEGATIVE_REGULATION_OF_IMMUNE_RESPONSE                            | 98  | 0.59953415 | 2.125662  | 0          | 1.18E-04 |
| GO_OXIDOREDUCTASE_COMPLEX                                            | 65  | -0.6251103 | -2.085543 | 0          | 1.19E-04 |
| GO_INTERLEUKIN_1_PRODUCTION                                          | 61  | 0.6234719  | 2.1053278 | 0          | 1.21E-04 |
| GO_MATURE_B_CELL_DIFFERENTIATION                                     | 16  | 0.83443755 | 2.108066  | 0          | 1.22E-04 |
| GO_T_CELL_ACTIVATION                                                 | 290 | 0.5163027  | 2.1082225 | 0          | 1.24E-04 |
| GO_MONOSACCHARIDE_METABOLIC_PROCESS                                  | 172 | -0.5306606 | -2.079588 | 0          | 1.42E-04 |
| KEGG_HISTIDINE_METABOLISM                                            | 19  | -0.8047929 | -2.076803 | 0          | 1.46E-04 |
| GO_NAD_BINDING                                                       | 46  | -0.6565214 | -2.077886 | 0          | 1.48E-04 |
| GO_OXIDATIVE_PHOSPHORYLATION                                         | 61  | -0.6123714 | -2.075134 | 0          | 1.57E-04 |
| GO_MONOSACCHARIDE_BIOSYNTHETIC_PROCESS                               | 64  | -0.6100166 | -2.068972 | 0          | 1.61E-04 |
| GO_STEROID_HORMONE_RECEPTOR_ACTIVITY                                 | 34  | -0.6904094 | -2.072712 | 0          | 1.62E-04 |
| GO_COFACTOR_BIOSYNTHETIC_PROCESS                                     | 141 | -0.5369382 | -2.06595  | 0          | 1.71E-04 |
| GO_NUCLEOSIDE_BISPHOSPHATE_METABOLIC_PROCESS                         | 86  | -0.5757176 | -2.061711 | 0          | 1.75E-04 |
| KEGG_GLYCOLYSIS_GLUconeogenesis                                      | 42  | -0.6581132 | -2.062446 | 0          | 1.76E-04 |
| GO GLUTAMINE_FAMILY_AMINO_ACID_METABOLIC_PROCESS                     | 46  | -0.6463163 | -2.05675  | 0          | 1.91E-04 |
| GO_LYMPHOCYTE_ACTIVATION_INVOLVED_IN_IMMUNE_RESPONSE                 | 103 | 0.57970685 | 2.0972955 | 0          | 1.91E-04 |
| GO_DEFENSE_RESPONSE_TO_VIRUS                                         | 143 | 0.55355275 | 2.0980725 | 0          | 1.93E-04 |
| GO_MITOCHONDRIAL_TRANSLATIONAL_TERMINATION                           | 45  | -0.6585794 | -2.055933 | 0          | 1.95E-04 |
| GO_ORGANELLAR_RIBOSOME                                               | 45  | -0.6436018 | -2.048115 | 0          | 2.10E-04 |
| GO_OXIDOREDUCTASE_ACTIVITY_ACTING_ON_CH_OH_GROUP_OF_DONORS           | 79  | -0.5908949 | -2.050785 | 0          | 2.11E-04 |
| GO_POSITIVE_REGULATION_OF_INTERLEUKIN_12_PRODUCTION                  | 21  | 0.7843035  | 2.09356   | 0          | 2.13E-04 |
| GO_INTEGRIN_BINDING                                                  | 91  | 0.5917659  | 2.0936282 | 0          | 2.16E-04 |
| REACTOME_ADAPTIVE_IMMUNE_SYSTEM                                      | 450 | 0.49426925 | 2.093949  | 0          | 2.18E-04 |
| GO_T_CELL_PROLIFERATION                                              | 121 | 0.56670576 | 2.0907462 | 0          | 2.20E-04 |
| GO_MYD88_DEPENDENT_TOLL_LIKE_RECEPTOR_SIGNALING_PATHWAY              | 20  | 0.791781   | 2.0914166 | 0          | 2.22E-04 |
| GO_INTERFERON_GAMMA_PRODUCTION                                       | 65  | 0.62284213 | 2.091917  | 0          | 2.25E-04 |
| GO_T_CELL_RECEPTOR_SIGNALING_PATHWAY                                 | 130 | 0.5641788  | 2.0887399 | 0          | 2.26E-04 |
| GO_RESPONSE_TO_VIRUS                                                 | 196 | 0.532527   | 2.0887845 | 0          | 2.29E-04 |
| REACTOME_NONSENSE_MEDIATED_DECAY_NMD                                 | 46  | 0.66561264 | 2.089227  | 0          | 2.31E-04 |
| GO_REGULATION_OF_HUMORAL_IMMUNE_RESPONSE                             | 65  | 0.6180855  | 2.0867019 | 0          | 2.37E-04 |
| REACTOME_SIGNALING_BY_ROBO_RECEPTORS                                 | 104 | 0.5821847  | 2.0824883 | 0          | 2.48E-04 |
| GO_NADH_DEHYDROGENASE_ACTIVITY                                       | 24  | -0.7398388 | -2.038073 | 0          | 2.72E-04 |
| GO_REGULATION_OF_T_CELL_ACTIVATION                                   | 199 | 0.53134036 | 2.0766377 | 0          | 2.97E-04 |
| GO_OXIDOREDUCTASE_ACTIVITY_ACTING_ON_THE_CH_NH_GROUP_OF_DONORS       | 16  | -0.7897101 | -2.030131 | 0          | 3.01E-04 |
| GO_MITOCHONDRIAL_TRANSMEMBRANE_TRANSPORT                             | 42  | -0.6512229 | -2.031225 | 0          | 3.04E-04 |
| REACTOME_COLLAGEN_CHAIN_TRIMERIZATION                                | 24  | 0.7385227  | 2.0745482 | 0          | 3.04E-04 |
| KEGG_PROXIMAL_TUBULE_BICARBONATE_RECLAMATION                         | 18  | -0.7919112 | -2.026364 | 0          | 3.05E-04 |

|                                                                            |     |            |           |   |          |
|----------------------------------------------------------------------------|-----|------------|-----------|---|----------|
| REACTOME_COLLAGEN_DEGRADATION                                              | 39  | 0.67471695 | 2.0745676 | 0 | 3.07E-04 |
| GO_POSITIVE_REGULATION_OF_PHAGOCYTOSIS                                     | 47  | 0.645222   | 2.0700405 | 0 | 3.07E-04 |
| GO_COLLAGEN_CONTAINING_EXTRACELLULAR_MATRIX                                | 264 | 0.5162326  | 2.0720556 | 0 | 3.10E-04 |
| GO_ANTIGEN_PROCESSING_AND_PRESENTATION                                     | 161 | 0.5370435  | 2.0727592 | 0 | 3.13E-04 |
| GO_CELL_ACTIVATION_INVOLVED_IN_IMMUNE_RESPONSE                             | 472 | 0.48411295 | 2.0654907 | 0 | 3.38E-04 |
| REACTOME_DEGRADATION_OF_THE_EXTRACELLULAR_MATRIX                           | 85  | 0.5882512  | 2.0661504 | 0 | 3.41E-04 |
| GO_REGULATION_OF_ANTIGEN_RECEPTOR_MEDIATED_SIGNALING_PATHWAY               | 41  | 0.66894585 | 2.0638218 | 0 | 3.58E-04 |
| GO_PTERIDINE_CONTAINING_COMPOUND_METABOLIC_PROCESS                         | 22  | -0.7372885 | -2.01718  | 0 | 3.59E-04 |
| GO_DENDRITIC_CELL_DIFFERENTIATION                                          | 28  | 0.718199   | 2.0610182 | 0 | 3.67E-04 |
| GO_PRODUCTION_OF_MOLECULAR_MEDIATOR_OF_IMMUNE_RESPONSE                     | 142 | 0.5451029  | 2.0580025 | 0 | 3.75E-04 |
| GO_ORGANIC_HYDROXY_COMPOUND_CATABOLIC_PROCESS                              | 43  | -0.6338819 | -2.014646 | 0 | 3.79E-04 |
| GO_TRANSLATIONAL_TERMINATION                                               | 55  | -0.6143643 | -2.012025 | 0 | 4.03E-04 |
| GO_REGULATION_OF_RESPONSE_TO_BIOTIC_STIMULUS                               | 307 | 0.50201774 | 2.0563035 | 0 | 4.07E-04 |
| GO_SMALL_MOLECULE_BIOSYNTHETIC_PROCESS                                     | 457 | -0.4716843 | -2.011035 | 0 | 4.11E-04 |
| GO_MYELOID_LEUKOCYTE_ACTIVATION                                            | 452 | 0.48320314 | 2.054604  | 0 | 4.15E-04 |
| GO_DEFENSE_RESPONSE_TO_BACTERIUM                                           | 135 | 0.546216   | 2.0532935 | 0 | 4.34E-04 |
| GO_COENZYME_BIOSYNTHETIC_PROCESS                                           | 91  | -0.5554664 | -2.004891 | 0 | 4.53E-04 |
| GO_SECONDARY_ACTIVE_TRANSMEMBRANE_TRANSPORTER_ACTIVITY                     | 134 | -0.5282381 | -2.005355 | 0 | 4.56E-04 |
| GO_MHC_PROTEIN_COMPLEX                                                     | 17  | 0.81694853 | 2.0507607 | 0 | 4.64E-04 |
| GO_B_CELL_ACTIVATION_INVOLVED_IN_IMMUNE_RESPONSE                           | 40  | 0.6740689  | 2.0487535 | 0 | 4.71E-04 |
| GO_EXTRACELLULAR_MATRIX_STRUCTURAL_CONSTITUENT_CONFERRING_TENSILE_STRENGTH | 24  | 0.7385229  | 2.0477283 | 0 | 4.74E-04 |
| KEGG_DRUG_METABOLISM_CYTOCHROME_P450                                       | 41  | -0.6461679 | -2.001484 | 0 | 4.76E-04 |
| GO_FC_RECEPTOR_MEDIATED_STIMULATORY_SIGNALING_PATHWAY                      | 69  | 0.59629303 | 2.0445147 | 0 | 4.76E-04 |
| GO_IMMUNE_RECEPTOR_ACTIVITY                                                | 87  | 0.5786091  | 2.0480702 | 0 | 4.78E-04 |
| GO_INTERLEUKIN_6_PRODUCTION                                                | 87  | 0.576535   | 2.0460293 | 0 | 4.80E-04 |
| GO_CELLULAR_DEFENSE_RESPONSE                                               | 36  | 0.67193365 | 2.040859  | 0 | 4.90E-04 |
| GO_REGULATION_OF_DEFENSE_RESPONSE                                          | 444 | 0.48074895 | 2.0409708 | 0 | 4.94E-04 |
| GO_CELLULAR_BIOGENIC_AMINE_METABOLIC_PROCESS                               | 32  | -0.6688463 | -1.998607 | 0 | 4.96E-04 |
| GO ASPARTATE_FAMILY_AMINO_ACID_CATABOLIC_PROCESS                           | 15  | -0.8156954 | -1.998789 | 0 | 5.00E-04 |
| GO_ALPHA_AMINO_ACID_BIOSYNTHETIC_PROCESS                                   | 44  | -0.6313474 | -1.999009 | 0 | 5.04E-04 |
| GO_LEUKOCYTE_MIGRATION                                                     | 305 | 0.50042397 | 2.0364535 | 0 | 5.20E-04 |
| GO_REGULATION_OF_LEUKOCYTE_APOPTOTIC_PROCESS                               | 57  | 0.61798567 | 2.0366538 | 0 | 5.24E-04 |
| GO_I_KAPPAB_KINASE_NF_KAPPAB_SIGNALING                                     | 167 | 0.5243533  | 2.0351138 | 0 | 5.26E-04 |
| HALLMARK_G2M_CHECKPOINT                                                    | 122 | 0.5519363  | 2.037113  | 0 | 5.28E-04 |
| GO_POSITIVE_REGULATION_OF_I_KAPPAB_KINASE_NF_KAPPAB_SIGNALING              | 118 | 0.56032294 | 2.0345984 | 0 | 5.32E-04 |
| REACTOME_SLC_MEDIATED_TRANSMEMBRANE_TRANSPORT                              | 142 | -0.5204597 | -1.995085 | 0 | 5.39E-04 |
| GO_CELLULAR_RESPONSE_TO_XENOBIOTIC_STIMULUS                                | 117 | -0.5348817 | -1.992034 | 0 | 5.50E-04 |
| GO_NEGATIVE_REGULATION_OF_VIRAL_PROCESS                                    | 65  | 0.60560226 | 2.0309997 | 0 | 5.55E-04 |
| GO_CELL_KILLING                                                            | 96  | 0.56700677 | 2.0326402 | 0 | 5.58E-04 |
| PID_SYNDECAN_1_PATHWAY                                                     | 33  | 0.68438375 | 2.0311308 | 0 | 5.59E-04 |
| NABA_COLLAGENS                                                             | 24  | 0.73852265 | 2.0313504 | 0 | 5.63E-04 |
| GO_MYELOID_LEUKOCYTE_MEDIATED_IMMUNITY                                     | 389 | 0.4799269  | 2.0283685 | 0 | 5.75E-04 |
| GO_POSITIVE_REGULATION_OF_ADAPTIVE_IMMUNE_RESPONSE                         | 64  | 0.6009637  | 2.0295103 | 0 | 5.80E-04 |
| GO_EXTRACELLULAR_STRUCTURE_ORGANIZATION                                    | 242 | 0.50440216 | 2.0279746 | 0 | 5.81E-04 |
| REACTOME_MITOCHONDRIAL_PROTEIN_IMPORT                                      | 31  | -0.6816427 | -1.98678  | 0 | 5.97E-04 |

|                                                                                                                                                                     |     |            |           |   |          |
|---------------------------------------------------------------------------------------------------------------------------------------------------------------------|-----|------------|-----------|---|----------|
| GO_REGULATION_OF_LEUKOCYTE_MEDIATED_IMMUNITY                                                                                                                        | 130 | 0.5442821  | 2.0226068 | 0 | 6.16E-04 |
| GO_REGULATION_OF_SYMBIOSIS_ENCOMPASSING_MUTUALISM_THROUGH_PARASITISM                                                                                                | 136 | 0.5399299  | 2.0254092 | 0 | 6.20E-04 |
| GO_REGULATION_OF_PRODUCTION_OF_MOLECULAR_MEDIATOR_OF_IMMUNE_RESPONSE                                                                                                | 96  | 0.56307787 | 2.0228925 | 0 | 6.20E-04 |
| GO_PROGRAMMED_NECROTIC_CELL_DEATH                                                                                                                                   | 25  | 0.72679085 | 2.0255587 | 0 | 6.25E-04 |
| GO_POSITIVE_REGULATION_OF_CELL_CELL_ADHESION                                                                                                                        | 169 | 0.52908844 | 2.024526  | 0 | 6.25E-04 |
| REACTOME_CITRIC_ACID_CYCLE_TCA_CYCLE                                                                                                                                | 18  | -0.7750162 | -1.980282 | 0 | 6.33E-04 |
| GO_OXIDOREDUCTASE_ACTIVITY_ACTING_ON_PAIRED_DONORS_WITH_INCORPORATION_OR_REDUCTION_OF_MOLECULAR_OXYGEN_NAD_P_H_AS_ONE_DONOR_AND_INCORPORATION_OF_ONE_ATOM_OF_OXYGEN | 30  | -0.6661966 | -1.979183 | 0 | 6.39E-04 |
| REACTOME_NEUTROPHIL_DEGRANULATION                                                                                                                                   | 334 | 0.48882136 | 2.0194082 | 0 | 6.76E-04 |
| NABA_CORE_MATRISOME                                                                                                                                                 | 145 | 0.52967125 | 2.0201297 | 0 | 6.76E-04 |
| GO_ANTIGEN_PROCESSING_AND_PRESENTATION_OF_EXOGENOUS_PEPTIDE_ANTIGEN_VIA_MHC_CLASS_I                                                                                 | 50  | 0.6362913  | 2.0195591 | 0 | 6.81E-04 |
| REACTOME_SYNTHESIS_OF_BILE_ACIDS_AND_BILE_SALTS                                                                                                                     | 20  | -0.734449  | -1.97601  | 0 | 6.84E-04 |
| GO_COMPLEX_OF_COLLAGEN_TRIMERS                                                                                                                                      | 16  | 0.80637866 | 2.0108812 | 0 | 7.00E-04 |
| GO_POSITIVE_REGULATION_OF_B_CELL_ACTIVATION                                                                                                                         | 55  | 0.6275533  | 2.013245  | 0 | 7.01E-04 |
| REACTOME_PARASITE_INFECTION                                                                                                                                         | 53  | 0.62265563 | 2.009735  | 0 | 7.04E-04 |
| KEGG_HEMATOPOIETIC_CELL_LINEAGE                                                                                                                                     | 57  | 0.61069524 | 2.011786  | 0 | 7.05E-04 |
| REACTOME_CELL_CYCLE_CHECKPOINTS                                                                                                                                     | 126 | 0.5464391  | 2.0132012 | 0 | 7.05E-04 |
| GO_INTERFERON_BETA_PRODUCTION                                                                                                                                       | 31  | 0.69854265 | 2.0134237 | 0 | 7.06E-04 |
| REACTOME_INTERLEUKIN_10_SIGNALING                                                                                                                                   | 35  | 0.6580926  | 2.0123045 | 0 | 7.09E-04 |
| GO_POSITIVE_REGULATION_OF_DEFENSE_RESPONSE                                                                                                                          | 293 | 0.49658543 | 2.013908  | 0 | 7.11E-04 |
| GO_NEGATIVE_REGULATION_OF_VIRAL_LIFE_CYCLE                                                                                                                          | 52  | 0.6330413  | 2.0148244 | 0 | 7.16E-04 |
| GO_REGULATION_OF_VIRAL_LIFE_CYCLE                                                                                                                                   | 87  | 0.5765351  | 2.0161731 | 0 | 7.17E-04 |
| GO_POSITIVE_REGULATION_OF_INTERLEUKIN_6_PRODUCTION                                                                                                                  | 56  | 0.6200052  | 2.0069194 | 0 | 7.20E-04 |
| GO_INTERLEUKIN_1_BETA_PRODUCTION                                                                                                                                    | 54  | 0.617846   | 2.0150762 | 0 | 7.21E-04 |
| GO_BASEMENT_MEMBRANE                                                                                                                                                | 55  | 0.6290896  | 2.0071352 | 0 | 7.25E-04 |
| GO_REGULATION_OF_CELL_ACTIVATION                                                                                                                                    | 360 | 0.4835262  | 2.0043998 | 0 | 7.58E-04 |
| GO_MYELOID_LEUKOCYTE_DIFFERENTIATION                                                                                                                                | 126 | 0.53453314 | 1.9975432 | 0 | 7.68E-04 |
| GO_NEGATIVE_REGULATION_OF_LYMPHOCYTE_MEDIATED_IMMUNITY                                                                                                              | 28  | 0.707576   | 1.9978553 | 0 | 7.73E-04 |
| GO_PHAGOCYTTIC_VESICLE_MEMBRANE                                                                                                                                     | 50  | 0.6234795  | 2.0004392 | 0 | 7.77E-04 |
| GO_CYTOKINE_SECRETION                                                                                                                                               | 142 | 0.5269137  | 1.9955804 | 0 | 7.95E-04 |
| REACTOME_COMPLEMENT_CASCADE                                                                                                                                         | 53  | 0.618695   | 1.9952196 | 0 | 7.98E-04 |
| GO_FATTY_ACYL_COA_BINDING                                                                                                                                           | 16  | -0.795861  | -1.968451 | 0 | 8.08E-04 |
| GO_VITAMIN_B6_BINDING                                                                                                                                               | 33  | -0.6716303 | -1.967307 | 0 | 8.12E-04 |
| REACTOME_EUKARYOTIC_TRANSLATION_ELONGATION                                                                                                                          | 32  | 0.683572   | 1.9920024 | 0 | 8.41E-04 |
| GO_INFLAMMATORY_RESPONSE                                                                                                                                            | 447 | 0.47177336 | 1.9900228 | 0 | 8.41E-04 |
| GO_POSITIVE_REGULATION_OF_RESPONSE_TO_CYTOKINE_STIMULUS                                                                                                             | 37  | 0.65711755 | 1.9910126 | 0 | 8.44E-04 |
| GO_ACTIVATION_OF_INNATE_IMMUNE_RESPONSE                                                                                                                             | 186 | 0.5125591  | 1.9905716 | 0 | 8.47E-04 |
| PID_INTEGRIN_A4B1_PATHWAY                                                                                                                                           | 21  | 0.7422398  | 1.9892068 | 0 | 8.55E-04 |
| GO_LUMENAL_SIDE_OF_ENDOPLASMIC_RETICULUM_MEMBRANE                                                                                                                   | 17  | 0.7991514  | 1.9892145 | 0 | 8.60E-04 |
| GO_REGULATION_OF_B_CELL_PROLIFERATION                                                                                                                               | 42  | 0.6353078  | 1.9874798 | 0 | 8.96E-04 |
| GO_NEGATIVE_REGULATION_OF_MULTI_ORGANISM_PROCESS                                                                                                                    | 141 | 0.5202538  | 1.9857062 | 0 | 9.08E-04 |
| GO_FC_RECEPTOR_SIGNALING_PATHWAY                                                                                                                                    | 125 | 0.533168   | 1.9859109 | 0 | 9.13E-04 |
| GO_AMINO_ACID_BINDING                                                                                                                                               | 37  | -0.6459281 | -1.958637 | 0 | 9.33E-04 |
| HALLMARK_COMPLEMENT                                                                                                                                                 | 163 | 0.51203185 | 1.9837354 | 0 | 9.40E-04 |



|                                                                               |     |            |           |             |             |
|-------------------------------------------------------------------------------|-----|------------|-----------|-------------|-------------|
| GO_CYTOKINE_METABOLIC_PROCESS                                                 | 72  | 0.5730254  | 1.9820607 | 0           | 9.42E-04    |
| GO_POSITIVE_REGULATION_OF_IMMUNE_EFFECTOR_PROCESS                             | 142 | 0.5286947  | 1.9816153 | 0           | 9.59E-04    |
| GO_REGULATION_OF_LYMPHOCYTE_MEDIATED_IMMUNITY                                 | 86  | 0.5647398  | 1.9806303 | 0           | 9.63E-04    |
| GO_POSITIVE_REGULATION_OF_B_CELL_MEDIATED_IMMUNITY                            | 19  | 0.7425922  | 1.9807087 | 0           | 9.69E-04    |
| GO_CARBON_CARBON_LYASE_ACTIVITY                                               | 37  | -0.6419026 | -1.956747 | 0           | 9.71E-04    |
| GO_ORGANIC_ACID_BIOSYNTHETIC_PROCESS                                          | 217 | -0.486579  | -1.956555 | 0           | 9.74E-04    |
| KEGG_ALANINE_ASPARTATE_AND_Glutamate_METABOLISM                               | 22  | -0.7180977 | -1.955206 | 0.002083333 | 9.75E-04    |
| GO_ANION_HOMEOSTASIS                                                          | 42  | -0.6190319 | -1.955577 | 0           | 9.77E-04    |
| GO_POSITIVE_REGULATION_OF_PRODUCTION_OF_MOLECULAR_MEDIATOR_OF_IMMUNE_RESPONSE | 66  | 0.59314835 | 1.9794295 | 0           | 9.80E-04    |
| GO_MYELOID_LEUKOCYTE_MIGRATION                                                | 131 | 0.5213908  | 1.9783223 | 0           | 9.96E-04    |
| GO_CELLULAR_CARBOHYDRATE_CATABOLIC_PROCESS                                    | 31  | -0.6603433 | -1.953489 | 0           | 9.97E-04    |
| GO_POSITIVE_REGULATION_OF_RESPONSE_TO_BIOTIC_STIMULUS                         | 229 | 0.49895126 | 1.9772573 | 0           | 0.001006435 |
| GO_CELL_RECOGNITION                                                           | 80  | 0.5739764  | 1.9766084 | 0           | 0.001007963 |
| KEGG_CHEMOKINE_SIGNALING_PATHWAY                                              | 119 | 0.5363139  | 1.9775375 | 0           | 0.001012154 |
| GO_REGULATION_OF_FATTY_ACID_OXIDATION                                         | 21  | -0.7274227 | -1.950097 | 0.00407332  | 0.001050925 |
| REACTOME_EPH_EPHRIN_SIGNALING                                                 | 64  | 0.5915918  | 1.9747441 | 0           | 0.001073882 |
| PID_AVB3_INTEGRIN_PATHWAY                                                     | 53  | 0.6048353  | 1.9719923 | 0           | 0.001084701 |
| REACTOME_MET_PROMOTES_CELL_MOTILITY                                           | 26  | 0.70889145 | 1.9713854 | 0           | 0.001085708 |
| GO_T_CELL_MEDIATED_IMMUNITY                                                   | 71  | 0.5850766  | 1.9735557 | 0           | 0.001089552 |
| REACTOME_HOST_INTERACTIONS_OF_HIV_FACTORS                                     | 78  | 0.5788041  | 1.9721363 | 0           | 0.001090694 |
| GO_INTERLEUKIN_12_PRODUCTION                                                  | 35  | 0.65079725 | 1.9699681 | 0           | 0.001114412 |
| GO_GlutAMINE_FAMILY_AMINO_ACID_CATABOLIC_PROCESS                              | 21  | -0.7167017 | -1.945956 | 0           | 0.001132854 |
| GO_MHC_PROTEIN_COMPLEX_BINDING                                                | 23  | 0.7154551  | 1.9677479 | 0           | 0.001170711 |
| GO_SIDE_OF_MEMBRANE                                                           | 343 | 0.47473577 | 1.9677358 | 0           | 0.00117129  |
| GO_POSITIVE_REGULATION_OF_HEMOPOIESIS                                         | 119 | 0.53431845 | 1.9670714 | 0           | 0.001178799 |
| GO_NEUTROPHIL_MIGRATION                                                       | 75  | 0.5730711  | 1.9659736 | 0           | 0.001213402 |
| GO_SECRETORY_GRANULE_MEMBRANE                                                 | 189 | 0.50351197 | 1.9657794 | 0           | 0.001213739 |
| KEGG_LEUKOCYTE_TRANSENDOTHELIAL_MIGRATION                                     | 81  | 0.5634489  | 1.9652039 | 0           | 0.001220824 |
| GO_REGULATION_OF_NATURAL_KILLER_CELL_ACTIVATION                               | 20  | 0.742387   | 1.96476   | 0           | 0.001221315 |
| GO_REGULATION_OF_B_CELL_MEDIATED_IMMUNITY                                     | 28  | 0.684015   | 1.9627144 | 0           | 0.001241502 |
| GO_LYMPHOCYTE_MIGRATION                                                       | 68  | 0.57040405 | 1.9587449 | 0           | 0.001300735 |
| KEGG_PATHOGENIC_ESCHERICHIA_COLI_INFECTIION                                   | 40  | 0.6388041  | 1.9588022 | 0           | 0.00130744  |
| GO_REGULATION_OF_CYTOKINE_PRODUCTION_INVOLVED_IN_IMMUNE_RESPONSE              | 63  | 0.58240485 | 1.9573946 | 0           | 0.001313503 |
| GO_TOLL_LIKE_RECEPTOR_SIGNALING_PATHWAY                                       | 88  | 0.5533282  | 1.96      | 0           | 0.001314214 |
| REACTOME_INFLUENZA_INFECTIION                                                 | 72  | 0.5755982  | 1.9571267 | 0           | 0.001320032 |
| GO_ORGANIC_ANION_TRANSMEMBRANE_TRANSPORTER_ACTIVITY                           | 110 | -0.5269566 | -1.937741 | 0           | 0.00132526  |
| GO_COTRANSLATIONAL_PROTEIN_TARGETING_TO_MEMBRANE                              | 38  | 0.65451646 | 1.9566386 | 0           | 0.001332932 |
| GO_LYASE_ACTIVITY                                                             | 120 | -0.5253762 | -1.937842 | 0           | 0.001334037 |
| GO_OSTEOCLAST_DIFFERENTIATION                                                 | 54  | 0.5925779  | 1.9536186 | 0           | 0.001357346 |
| REACTOME_INITIAL_TRIGGERING_OF_COMPLEMENT                                     | 26  | 0.69004655 | 1.9542449 | 0           | 0.001357713 |
| GO_CALCIIUM_DEPENDENT_PHOSPHOLIPID_BINDING                                    | 28  | 0.6797488  | 1.9544214 | 0           | 0.001364502 |
| GO_CYTOKINE_PRODUCTION_INVOLVED_IN_IMMUNE_RESPONSE                            | 74  | 0.56653523 | 1.9547322 | 0           | 0.001371358 |
| GO_AROMATIC_AMINO_ACID_FAMILY_CATABOLIC_PROCESS                               | 17  | -0.7665316 | -1.934114 | 0           | 0.001413073 |
| GO_LEUKOCYTE_DIFFERENTIATION                                                  | 305 | 0.47270405 | 1.9512128 | 0           | 0.001432753 |
| GO_NEUTRAL_LIPID_METABOLIC_PROCESS                                            | 67  | -0.5628683 | -1.932597 | 0           | 0.001435829 |
| REACTOME_METABOLISM_OF_WATER_SOLUBLE_VITAMINS_AND_COFACTORS                   | 73  | -0.5618602 | -1.932358 | 0           | 0.001440116 |

|                                                                           |     |            |           |             |             |
|---------------------------------------------------------------------------|-----|------------|-----------|-------------|-------------|
| GO_CELL_ADHESION_MOLECULE_BINDING                                         | 308 | 0.4707432  | 1.9480804 | 0           | 0.001463396 |
| SIG_REGULATION_OF_THE_ACTIN_CYTOSKELETON_BY_RHO_GTPAS<br>ES               | 21  | 0.734466   | 1.9468508 | 0           | 0.001481218 |
| REACTOME_ASSEMBLY_OF_COLLAGEN_FIBRILS_AND_OTHER_MULT<br>IMERIC_STRUCTURES | 37  | 0.6396472  | 1.9459008 | 0.002087683 | 0.001511376 |
| GO_POSITIVE_REGULATION_OF_INTERLEUKIN_1_PRODUCTION                        | 30  | 0.67961174 | 1.9452329 | 0           | 0.001522537 |
| GO_POSITIVE_REGULATION_OF_INTERLEUKIN_8_PRODUCTION                        | 40  | 0.63379085 | 1.9432762 | 0           | 0.001558357 |
| GO_ORGANIC_ACID_TRANSPORT                                                 | 193 | -0.4857485 | -1.926172 | 0           | 0.001573182 |
| GO_BILE_ACID_BIOSYNTHETIC_PROCESS                                         | 19  | -0.7237598 | -1.926919 | 0           | 0.001574233 |
| REACTOME_NERVOUS_SYSTEM_DEVELOPMENT                                       | 335 | 0.46755987 | 1.9413283 | 0           | 0.001600106 |
| REACTOME_BILE_ACID_AND_BILE_SALT_METABOLISM                               | 26  | -0.6814162 | -1.92429  | 0           | 0.001616316 |
| GO_TUMOR_NECROSIS_FACTOR_BIOSYNTHETIC_PROCESS                             | 17  | 0.7695063  | 1.9373356 | 0           | 0.001677992 |
| HALLMARK_E2F_TARGETS                                                      | 134 | 0.5213378  | 1.9376329 | 0           | 0.001679836 |
| GO_EPHRIN_RECEPTOR_SIGNALING_PATHWAY                                      | 59  | 0.59125    | 1.9378489 | 0           | 0.001687797 |
| GO_INTEGRIN_MEDIATED_SIGNALING_PATHWAY                                    | 74  | 0.5590656  | 1.9369186 | 0           | 0.001688138 |
| GO_EXTERNAL_SIDE_OF_PLASMA_MEMBRANE                                       | 231 | 0.48284367 | 1.9380097 | 0           | 0.001695834 |
| GO_NEGATIVE_REGULATION_OF_LEUKOCYTE_APOPTOTIC_PROCESS                     | 36  | 0.64639044 | 1.9355803 | 0           | 0.001739937 |
| REACTOME_FCERI_MEDIATED_NF_KB_ACTIVATION                                  | 55  | 0.5938408  | 1.9346054 | 0           | 0.001773501 |
| GO_ALCOHOL_METABOLIC_PROCESS                                              | 241 | -0.4708178 | -1.918842 | 0           | 0.001848298 |
| GO_ANTIGEN_PROCESSING_AND_PRESENTATION_OF_PEPTIDE_ANT<br>IGEN             | 134 | 0.5176235  | 1.9307913 | 0           | 0.001871915 |
| GO_VIRAL_GENOME_REPLICATION                                               | 75  | 0.5613908  | 1.9305422 | 0           | 0.001872098 |
| GO_RESPONSE_TO_INTERFERON_ALPHA                                           | 17  | 0.77542263 | 1.9306316 | 0           | 0.001880685 |
| GO_CELL_CELL_ADHESION                                                     | 482 | 0.4506791  | 1.9302077 | 0           | 0.001887037 |
| GO_REGULATION_OF_CELL_ADHESION                                            | 425 | 0.45527384 | 1.9296012 | 0           | 0.001907441 |
| GO_POSITIVE_REGULATION_OF_CELL_ADHESION                                   | 256 | 0.48051816 | 1.9283189 | 0           | 0.001939062 |
| GO_CHEMOKINE_BINDING                                                      | 22  | 0.7043095  | 1.9266505 | 0           | 0.001981959 |
| GO_ORGANIC_ACID_BINDING                                                   | 132 | -0.5049404 | -1.913266 | 0           | 0.002076983 |
| GO_NECROTIC_CELL_DEATH                                                    | 30  | 0.6528963  | 1.9225802 | 0           | 0.002133249 |
| GO_POSITIVE_REGULATION_OF_INFLAMMATORY_RESPONSE                           | 89  | 0.53809834 | 1.922243  | 0           | 0.002135092 |
| GO GRANULOCYTE MIGRATION                                                  | 90  | 0.5441637  | 1.921722  | 0           | 0.002148154 |
| REACTOME_MET_ACTIVATES_PTK2_SIGNALING                                     | 20  | 0.7406839  | 1.9182223 | 0           | 0.002149311 |
| GO_TUMOR_NECROSIS_FACTOR_MEDIATED_SIGNALING_PATHWAY                       | 96  | 0.53339523 | 1.9214753 | 0           | 0.002150025 |
| GO_POSITIVE_REGULATION_OF_SMALL_GTPASE_MEDIATED_SIGNA<br>L_TRANSDUCTION   | 37  | 0.6328691  | 1.9210914 | 0           | 0.002151963 |
| GO_B_CELL_DIFFERENTIATION                                                 | 69  | 0.5707003  | 1.9187634 | 0           | 0.002156737 |
| GO_T_CELL_MIGRATION                                                       | 41  | 0.61957026 | 1.9183071 | 0           | 0.002158458 |
| REACTOME_EPHB_MEDIATED_FORWARD_SIGNALING                                  | 28  | 0.68094957 | 1.919032  | 0           | 0.002160562 |
| GO_CHEMOKINE_PRODUCTION                                                   | 62  | 0.58461887 | 1.9199249 | 0           | 0.002162635 |
| GO_NEGATIVE_REGULATION_OF_INNATE_IMMUNE_RESPONSE                          | 38  | 0.63113916 | 1.9201078 | 0           | 0.002166359 |
| GO_REGULATION_OF_ANTIGEN_PROCESSING_AND_PRESENTATION                      | 17  | 0.768122   | 1.919396  | 0           | 0.002169875 |
| GO_EXTRACELLULAR_MATRIX                                                   | 319 | 0.4682656  | 1.9202225 | 0           | 0.002170224 |
| KEGG_NATURAL_KILLER_CELL_MEDIATED_CYTOTOXICITY                            | 86  | 0.54662186 | 1.917404  | 0           | 0.002178357 |
| KEGG_TYROSINE_METABOLISM                                                  | 28  | -0.659578  | -1.908959 | 0           | 0.002220694 |
| GO_INTERLEUKIN_8_PRODUCTION                                               | 54  | 0.5857559  | 1.91474   | 0           | 0.002282903 |
| GO_FOLIC_ACID_CONTAINING_COMPOUND_METABOLIC_PROCESS                       | 17  | -0.7549537 | -1.90641  | 0           | 0.002301841 |
| GO_LEUKOCYTE_MEDIATED_CYTOTOXICITY                                        | 70  | 0.5646322  | 1.914104  | 0           | 0.002310694 |
| GO_MACROPHAGE_ACTIVATION                                                  | 66  | 0.5717389  | 1.9138631 | 0           | 0.00231188  |

|                                                                                   |     |            |           |             |             |
|-----------------------------------------------------------------------------------|-----|------------|-----------|-------------|-------------|
| GO_CELLULAR_RESPONSE_TO_BIOTIC_STIMULUS                                           | 150 | 0.5030143  | 1.9134148 | 0           | 0.00231288  |
| GO_LIPOPOLYSACCHARIDE_BINDING                                                     | 18  | 0.7306326  | 1.9131062 | 0           | 0.002319239 |
| HALLMARK_PEROXISOME                                                               | 79  | -0.5434679 | -1.90536  | 0           | 0.002335103 |
| REACTOME_REGULATION_OF_EXPRESSION_OF_SLITS_AND_ROBOS                              | 77  | 0.5548074  | 1.9118587 | 0           | 0.002343392 |
| GO_POSITIVE_REGULATION_OF_MULTI_ORGANISM_PROCESS                                  | 307 | 0.46489567 | 1.9124386 | 0           | 0.002346686 |
| GO_COLLAGEN_TRIMER                                                                | 42  | 0.61520165 | 1.9115243 | 0           | 0.0023504   |
| REACTOME_PD_1_SIGNALING                                                           | 16  | 0.7772079  | 1.9120072 | 0           | 0.002352996 |
| GO_MONOSACCHARIDE_CATABOLIC_PROCESS                                               | 44  | -0.6106731 | -1.90483  | 0           | 0.002355508 |
| GO_OXIDOREDUCTASE_ACTIVITY_ACTING_ON_NAD_P_H                                      | 68  | -0.5659488 | -1.90418  | 0           | 0.002358161 |
| GO_INTERLEUKIN_8_SECRETION                                                        | 21  | 0.7268214  | 1.9115696 | 0           | 0.002359954 |
| GO_OXIDOREDUCTASE_ACTIVITY_ACTING_ON_THE_ALDEHYDE_OR_OXO_GROUP_OF_DONORS          | 33  | -0.6401753 | -1.903341 | 0           | 0.002365077 |
| GO_CARBON_OXYGEN_LYASE_ACTIVITY                                                   | 46  | -0.6143063 | -1.90297  | 0           | 0.002367521 |
| GO_FAD_BINDING                                                                    | 27  | -0.6610065 | -1.901088 | 0           | 0.002419773 |
| GO_POSITIVE_REGULATION_OF_LEUKOCYTE_DIFFERENTIATION                               | 97  | 0.53179085 | 1.907974  | 0           | 0.002491137 |
| REACTOME_FCERI_MEDIATED_MAPK_ACTIVATION                                           | 35  | 0.6327763  | 1.9066699 | 0           | 0.002527694 |
| REACTOME_TRANSPORT_OF_MATURE_TRANSCRIPT_TO_CYTOPLASM                              | 50  | 0.5905959  | 1.9060949 | 0           | 0.002532934 |
| GO_PROTEIN_TRIMERIZATION                                                          | 20  | 0.7155428  | 1.9051878 | 0           | 0.002538075 |
| GO_POSITIVE_REGULATION_OF_RESPONSE_TO_EXTERNAL_STIMULUS                           | 377 | 0.455889   | 1.9052163 | 0           | 0.002548147 |
| GO_BONE_CELL_DEVELOPMENT                                                          | 19  | 0.7348847  | 1.9053464 | 0           | 0.002553212 |
| KEGG_GLYCEROLIPID_METABOLISM                                                      | 29  | -0.6498272 | -1.896643 | 0           | 0.002587229 |
| HALLMARK_KRAS_SIGNALING_UP                                                        | 152 | 0.50504833 | 1.9040183 | 0           | 0.002598718 |
| GO_BILE_ACID_METABOLIC_PROCESS                                                    | 25  | -0.6670209 | -1.894605 | 0           | 0.002679149 |
| GO_ANION_TRANSMEMBRANE_TRANSPORTER_ACTIVITY                                       | 176 | -0.4854138 | -1.893458 | 0           | 0.002700597 |
| GO_PEPTIDE_ANTIGEN_BINDING                                                        | 17  | 0.74259114 | 1.9022998 | 0.003861004 | 0.002703807 |
| REACTOME_SIGNALING_BY_INTERLEUKINS                                                | 271 | 0.47030362 | 1.9019558 | 0           | 0.002713544 |
| PID_CASPASE_PATHWAY                                                               | 38  | 0.6397996  | 1.9006242 | 0           | 0.002720066 |
| GO_ANCHORING_JUNCTION                                                             | 499 | 0.4423401  | 1.9016914 | 0           | 0.002727657 |
| REACTOME_CELL_SURFACE_INTERACTIONS_AT_THE_VASCULAR_WALL                           | 117 | 0.514651   | 1.9007168 | 0           | 0.002730528 |
| GO_POSITIVE_REGULATION_OF_INTERFERON_GAMMA_PRODUCTION                             | 37  | 0.6363449  | 1.9008777 | 0           | 0.002731129 |
| GO_DNA_CONFORMATION_CHANGE                                                        | 127 | 0.5106425  | 1.9013053 | 0           | 0.002731875 |
| GO_ORGANIC_HYDROXY_COMPOUND_METABOLIC_PROCESS                                     | 347 | -0.4505794 | -1.890282 | 0           | 0.002827297 |
| GO_POSITIVE_REGULATION_OF_INTERLEUKIN_2_PRODUCTION                                | 21  | 0.6957716  | 1.8977125 | 0.00204918  | 0.002871515 |
| GO_PATTERN_RECOGNITION_RECEPTOR_ACTIVITY                                          | 17  | 0.75216246 | 1.8964726 | 0           | 0.002933481 |
| GO_DICARBOXYLIC_ACID_TRANSPORT                                                    | 59  | -0.5698445 | -1.887949 | 0           | 0.002936455 |
| GO_ANTIPORTER_ACTIVITY                                                            | 43  | -0.5997776 | -1.887437 | 0           | 0.002947695 |
| GO_ACETYL_COA_METABOLIC_PROCESS                                                   | 29  | -0.6493198 | -1.885883 | 0.002057613 | 0.002985003 |
| REACTOME_TRANSPORT_OF_BILE_SALTS_AND_ORGANIC_ACIDS_METAL_IONS_AND_AMINE_COMPOUNDS | 46  | -0.5847555 | -1.88616  | 0           | 0.002995077 |
| GO_MICROBODY_MEMBRANE                                                             | 39  | -0.6011162 | -1.886004 | 0           | 0.002997938 |
| REACTOME_RHO_GTPASE_EFFECTORS                                                     | 148 | 0.50207204 | 1.8942707 | 0           | 0.003046451 |
| REACTOME_COSTIMULATION_BY_THE_CD28_FAMILY                                         | 41  | 0.6190852  | 1.894379  | 0           | 0.003053145 |
| GO_PLATELET_ACTIVATION                                                            | 104 | 0.51922166 | 1.8936002 | 0           | 0.003063884 |
| GO_AZUROPHIL_GRANULE                                                              | 105 | 0.5217162  | 1.8932687 | 0           | 0.003071395 |
| REACTOME_METABOLISM_OF_VITAMINS_AND_COFACTORS                                     | 120 | -0.5129451 | -1.882062 | 0           | 0.003095991 |
| GO_MONOVALENT_INORGANIC_CATION_TRANSMEMBRANE_TRANSPORTER_ACTIVITY                 | 190 | -0.4758462 | -1.882288 | 0           | 0.003113384 |

|                                                                                        |     |            |           |             |             |
|----------------------------------------------------------------------------------------|-----|------------|-----------|-------------|-------------|
| GO_LEUKOCYTE_HOMEOSTASIS                                                               | 54  | 0.58043617 | 1.8904544 | 0           | 0.003184574 |
| GO_NEGATIVE_REGULATION_OF_CYTOKINE_PRODUCTION                                          | 167 | 0.496483   | 1.8899355 | 0           | 0.003210975 |
| REACTOME_SUMOYLATION_OF_DNA_REPLICATION_PROTEINS                                       | 31  | 0.6464422  | 1.8898672 | 0           | 0.003213334 |
| KEGG_RIBOSOME                                                                          | 31  | 0.6455981  | 1.8895444 | 0           | 0.003225496 |
| REACTOME_SYNTHESIS_OF_BILE_ACIDS_AND_BILE_SALTS_VIA_7ALPHA_HYDROXYCHOLESTEROL          | 15  | -0.7558383 | -1.878961 | 0           | 0.003268981 |
| GO_INTRINSIC_COMPONENT_OF_MITOCHONDRIAL_INNER_MEMBRANE                                 | 24  | -0.6819692 | -1.876994 | 0.003891051 | 0.003336258 |
| GO_BRUSH_BORDER_MEMBRANE                                                               | 39  | -0.6095166 | -1.874397 | 0           | 0.003422156 |
| GO_PURINE_CONTAINING_COMPOUND_METABOLIC_PROCESS                                        | 272 | -0.4546028 | -1.873993 | 0           | 0.00342247  |
| GO_INTRINSIC_COMPONENT_OF_MITOCHONDRIAL_MEMBRANE                                       | 39  | -0.6060885 | -1.874782 | 0           | 0.003425492 |
| REACTOME_PLATELET_AGGREGATION_PLUG_FORMATION                                           | 26  | 0.673194   | 1.8858029 | 0           | 0.003468205 |
| GO_POSITIVE_REGULATION_OF_CHEMOKINE_PRODUCTION                                         | 41  | 0.6126402  | 1.8855711 | 0           | 0.003488018 |
| GO_NEGATIVE_REGULATION_OF_REGULATED_SECRETORY_PATHWAY                                  | 18  | 0.73747545 | 1.8844863 | 0           | 0.003536105 |
| GO_MHC_CLASS_II_PROTEIN_COMPLEX_BINDING                                                | 16  | 0.7524027  | 1.8838422 | 0.001972387 | 0.003555837 |
| GO_LEUKOCYTE_ADHESION_TO_VASCULAR_ENDOTHELIAL_CELL                                     | 29  | 0.6740821  | 1.8828613 | 0           | 0.003598648 |
| KEGG_PARKINSONS_DISEASE                                                                | 56  | -0.5627036 | -1.869385 | 0           | 0.003607471 |
| GO_HYDROLASE_ACTIVITY_ACTING_ON_CARBON_NITROGEN_BUT_NOT_PEPTIDE_BONDS_IN_LINEAR_AMIDES | 38  | -0.6074406 | -1.869763 | 0           | 0.003611897 |
| GO_POSITIVE_REGULATION_OF_CYTOKINE_PRODUCTION_INVOLVED_IN_IMMUNE_RESPONSE              | 42  | 0.60602444 | 1.882244  | 0           | 0.003613247 |
| REACTOME_DEGRADATION_OF_BETA_CATENIN_BY_THE_DESTRUCTIVE_COMPLEX                        | 42  | 0.60847604 | 1.8815566 | 0           | 0.003627998 |
| GO_ESTABLISHMENT_OF_PROTEIN_LOCALIZATION_TO_ENDOPLASMIC_RETICULUM                      | 43  | 0.60382414 | 1.8805621 | 0.001908397 | 0.003661382 |
| GO_ARGININE_METABOLIC_PROCESS                                                          | 15  | -0.7650853 | -1.867396 | 0           | 0.003662992 |
| KEGG_ASTHMA                                                                            | 20  | 0.71279246 | 1.8803021 | 0.002061856 | 0.003666735 |
| GO_MRNA_EXPORT_FROM_NUCLEUS                                                            | 59  | 0.5671179  | 1.8798989 | 0           | 0.003667833 |
| REACTOME_CD22_MEDIATED_BCR_REGULATION                                                  | 17  | 0.74339694 | 1.8800801 | 0.002020202 | 0.003671751 |
| GO_VIRAL_LIFE_CYCLE                                                                    | 199 | 0.4802477  | 1.8790144 | 0           | 0.003673652 |
| GO_POSITIVE_REGULATION_OF_CYTOKINE_SECRETION                                           | 83  | 0.54196054 | 1.8806669 | 0           | 0.003674505 |
| GO_NEGATIVE_REGULATION_OF_EXOCYTOSIS                                                   | 25  | 0.68428737 | 1.8794229 | 0           | 0.003677512 |
| REACTOME_G2_M_CHECKPOINTS                                                              | 72  | 0.55387205 | 1.8777561 | 0           | 0.003697487 |
| PID_TCR_PATHWAY                                                                        | 47  | 0.597934   | 1.8769251 | 0           | 0.003702214 |
| REACTOME_DISEASES_ASSOCIATED_WITH_GLYCOSAMINOGLYCAN_METABOLISM                         | 25  | 0.68480617 | 1.8767465 | 0           | 0.003702697 |
| NABA_BASEMENT_MEMBRANES                                                                | 21  | 0.6906184  | 1.877812  | 0.003853565 | 0.00371037  |
| GO_B_CELL_PROLIFERATION                                                                | 61  | 0.56842595 | 1.8779467 | 0           | 0.003723344 |
| REACTOME_PROGRAMMED_CELL_DEATH                                                         | 109 | 0.51158124 | 1.8738527 | 0           | 0.003883467 |
| GO_LEUKOCYTE_ACTIVATION_INVOLVED_IN_INFLAMMATORY_RESPONSE                              | 34  | 0.6232885  | 1.8732831 | 0           | 0.003896314 |
| GO_POSITIVE_REGULATION_OF_ANION_TRANSPORT                                              | 34  | -0.6236492 | -1.863398 | 0           | 0.00390054  |
| GO_POSITIVE_REGULATION_OF_LYMPHOCYTE_DIFFERENTIATION                                   | 65  | 0.5587458  | 1.8719372 | 0           | 0.003944141 |
| GO_IMMUNOGLOBULIN_COMPLEX                                                              | 26  | 0.65773153 | 1.8710903 | 0.003960396 | 0.003978756 |
| GO_REGULATION_OF_CELL_KILLING                                                          | 59  | 0.56583935 | 1.8705186 | 0           | 0.004012946 |
| KEGG_CYTOKINE_CYTOKINE_RECEPTOR_INTERACTION                                            | 158 | 0.49168873 | 1.8699671 | 0           | 0.004037381 |
| GO_NATURAL_KILLER_CELL_MEDIATED_IMMUNITY                                               | 36  | 0.6282535  | 1.8700532 | 0           | 0.004038136 |
| KEGG_RETINOL_METABOLISM                                                                | 32  | -0.6314837 | -1.860294 | 0           | 0.004046662 |
| GO_CYTOKINE_BINDING                                                                    | 83  | 0.5372416  | 1.8694243 | 0           | 0.004075505 |

|                                                                           |     |            |           |             |             |
|---------------------------------------------------------------------------|-----|------------|-----------|-------------|-------------|
| GO_REGULATION_OF_LEUKOCYTE_DIFFERENTIATION                                | 167 | 0.48709252 | 1.8688226 | 0           | 0.004083172 |
| GO_Glutathione_metabolic_process                                          | 36  | -0.6152528 | -1.857716 | 0           | 0.004165387 |
| GO_POSITIVE_REGULATION_OF_TYPE_I_INTERFERON_PRODUCTION                    | 47  | 0.5871418  | 1.8669811 | 0           | 0.004167248 |
| REACTOME_SIGNALING_BY_RHO_GTPASES                                         | 210 | 0.47104067 | 1.8657756 | 0           | 0.004190472 |
| GO_NEGATIVE_REGULATION_OF_IMMUNE_EFFECTOR_PROCESS                         | 85  | 0.53134495 | 1.8658084 | 0           | 0.004204394 |
| GO_NEURON_CELLULAR_HOMEOSTASIS                                            | 21  | -0.6862416 | -1.85695  | 0           | 0.004205682 |
| GO_IMMUNOGLOBULIN_PRODUCTION                                              | 74  | 0.5491948  | 1.8650126 | 0           | 0.004206525 |
| GO_NEGATIVE_REGULATION_OF_CELL_KILLING                                    | 16  | 0.75073344 | 1.8643813 | 0           | 0.004247525 |
| GO_ANTIGEN_PROCESSING_AND_PRESENTATION_OF_PEPTIDE_ANTIGEN_VIA_MHC_CLASS_I | 67  | 0.54843205 | 1.8628465 | 0           | 0.004300361 |
| GO_LUMENAL_SIDE_OF_MEMBRANE                                               | 22  | 0.711561   | 1.8633596 | 0.002020202 | 0.004304973 |
| REACTOME_MITOTIC_G1_PHASE_AND_G1_S_TRANSITION                             | 86  | 0.5282641  | 1.8629761 | 0           | 0.004310218 |
| GO_RESPONSE_TO_CHEMOKINE                                                  | 70  | 0.55529547 | 1.8631462 | 0           | 0.00431169  |
| REACTOME_RESPONSE_OF_EIF2AK4_GCN2_TO_AMINO_ACID_DEFICIENCY                | 37  | 0.6111798  | 1.8615701 | 0.002057613 | 0.004352982 |
| REACTOME_MITOTIC_PROPHASE                                                 | 47  | 0.5890039  | 1.8597956 | 0.001926782 | 0.004379138 |
| KEGG_FOCAL_ADHESION                                                       | 139 | 0.49505237 | 1.860267  | 0           | 0.004382466 |
| REACTOME_DEFECTS_IN_VITAMIN_AND_COFACTOR_METABOLISM                       | 16  | -0.7303231 | -1.853358 | 0           | 0.004384226 |
| GO_DENDRITIC_CELL_MIGRATION                                               | 19  | 0.7072877  | 1.8607657 | 0.001904762 | 0.004384299 |
| GO_NEUROINFLAMMATORY_RESPONSE                                             | 47  | 0.58882433 | 1.8598193 | 0           | 0.004393174 |
| REACTOME_CHEMOKINE_RECEPTORS_BIND_CHEMOKINES                              | 43  | 0.60316646 | 1.8590609 | 0.002008032 | 0.004406027 |
| GO_STEROID_BIOSYNTHETIC_PROCESS                                           | 132 | -0.4898218 | -1.851188 | 0           | 0.004454267 |
| KEGG_PYRUVATE_METABOLISM                                                  | 29  | -0.6383074 | -1.851275 | 0           | 0.00447373  |
| GO_DNA_GEOMETRIC_CHANGE                                                   | 67  | 0.5464533  | 1.8575627 | 0           | 0.004532051 |
| PID_IL2_STAT5_PATHWAY                                                     | 19  | 0.72241676 | 1.8576509 | 0           | 0.00453426  |
| REACTOME_INFECTIOUS_DISEASE                                               | 387 | 0.44734395 | 1.8564544 | 0           | 0.004594475 |
| GO_LEUKOCYTE_APOPTOTIC_PROCESS                                            | 73  | 0.54619896 | 1.8551819 | 0           | 0.004640475 |
| GO_MONOCARBOXYLIC_ACID_BINDING                                            | 46  | -0.5752016 | -1.846926 | 0           | 0.004678551 |
| HALLMARK_APICAL_JUNCTION                                                  | 134 | 0.49193147 | 1.8542447 | 0           | 0.004682229 |
| GO_TERTIARY_GRANULE                                                       | 113 | 0.5135837  | 1.8519222 | 0           | 0.004860573 |
| GO_ENDOCYTIC_VESICLE_MEMBRANE                                             | 97  | 0.514233   | 1.8519683 | 0           | 0.004867798 |
| GO_APOPTOTIC_CELL_CLEARANCE                                               | 27  | 0.6490846  | 1.8507957 | 0           | 0.00488269  |
| GO_CELLULAR_RESPONSE_TO_INTERFERON_BETA                                   | 15  | 0.7523828  | 1.8508292 | 0           | 0.004893822 |
| PID_CD8_TCR_PATHWAY                                                       | 40  | 0.6008279  | 1.8508298 | 0           | 0.00490902  |
| GO_CELLULAR_EXTRAVASATION                                                 | 45  | 0.58671516 | 1.8496717 | 0           | 0.004923418 |
| GO_ORGANIC_ACID_TRANSMEMBRANE_TRANSPORT                                   | 80  | -0.5230595 | -1.843043 | 0           | 0.004937092 |
| GO_RESPIRATORY_BURST                                                      | 22  | 0.6806771  | 1.849707  | 0           | 0.004938567 |
| GO_TYPE_I_INTERFERON_PRODUCTION                                           | 72  | 0.5380754  | 1.8488048 | 0.001908397 | 0.004967011 |
| GO_ANTIBACTERIAL_HUMORAL_RESPONSE                                         | 21  | 0.69932014 | 1.847935  | 0           | 0.004994941 |
| GO_METAL_CLUSTER_BINDING                                                  | 42  | -0.5852802 | -1.841886 | 0           | 0.00501855  |
| GO_ALCOHOL_CATABOLIC_PROCESS                                              | 30  | -0.628474  | -1.841082 | 0.002066116 | 0.005049814 |
| REACTOME_SWITCHING_OF_ORIGINS_TO_A_POST_REPLICATIVE_STATE                 | 45  | 0.5916848  | 1.8468579 | 0           | 0.005073594 |
| PID_TOLL_ENDOGENOUS_PATHWAY                                               | 16  | 0.75765604 | 1.8464363 | 0.001926782 | 0.005093214 |
| HALLMARK_ANGIOGENESIS                                                     | 36  | 0.60656935 | 1.8451651 | 0.001838235 | 0.005131959 |
| GO_REGULATION_OF_TOLL_LIKE_RECEPTOR_SIGNALING_PATHWAY                     | 41  | 0.59601474 | 1.845369  | 0.001876173 | 0.005147464 |
| GO_NEGATIVE_REGULATION_OF_IMMUNE_SYSTEM_PROCESS                           | 288 | 0.45394167 | 1.8442992 | 0           | 0.005170491 |
| GO_PLASMA_MEMBRANE_SIGNALING_RECEPTOR_COMPLEX                             | 121 | 0.49239883 | 1.8443319 | 0           | 0.005186018 |
| GO_ACETYL_COA_BIOSYNTHETIC_PROCESS                                        | 18  | -0.7012864 | -1.838196 | 0.002132196 | 0.005230089 |

|                                                                                                                                                                                             |     |            |           |             |             |
|---------------------------------------------------------------------------------------------------------------------------------------------------------------------------------------------|-----|------------|-----------|-------------|-------------|
| REACTOME_METABOLISM_OF_LIPIDS                                                                                                                                                               | 440 | -0.4284234 | -1.838639 | 0           | 0.005231448 |
| GO_ORGANIC_ANION_TRANSPORT                                                                                                                                                                  | 275 | -0.4453558 | -1.837015 | 0           | 0.005308169 |
| GO_CHROMATIN_ASSEMBLY                                                                                                                                                                       | 45  | 0.5903303  | 1.8421751 | 0           | 0.005331069 |
| REACTOME_SYNDECAN_INTERACTIONS                                                                                                                                                              | 23  | 0.6696713  | 1.8416697 | 0           | 0.00536462  |
| GO_PROTEIN_TRANSMEMBRANE_IMPORT_INTO_INTRACELLULAR_ORGANELLE                                                                                                                                | 16  | -0.7371217 | -1.834697 | 0           | 0.005441852 |
| REACTOME_DISEASES_OF_IMMUNE_SYSTEM                                                                                                                                                          | 15  | 0.7540804  | 1.8397864 | 0           | 0.005473718 |
| REACTOME_THE_ROLE_OF_NEF_IN_HIV_1_REPLICATION_AND_DISEASE_PATHOGENESIS                                                                                                                      | 21  | 0.6799508  | 1.8393481 | 0.002012072 | 0.005480514 |
| REACTOME_CELL_CYCLE                                                                                                                                                                         | 315 | 0.44639105 | 1.8374931 | 0           | 0.005653687 |
| GO_GLIAL_CELL_ACTIVATION                                                                                                                                                                    | 38  | 0.61161035 | 1.8365663 | 0           | 0.005699198 |
| GO_NEGATIVE_REGULATION_OF_LEUKOCYTE_PROLIFERATION                                                                                                                                           | 51  | 0.56892425 | 1.8367622 | 0           | 0.005704572 |
| GO_POSITIVE_REGULATION_OF_INTERFERON_BETA_PRODUCTION                                                                                                                                        | 21  | 0.69796664 | 1.8360243 | 0           | 0.005727188 |
| REACTOME_ANTIGEN_PRESENTATION_FOLDING_ASSEMBLY_AND_PEPTIDE_LOADING_OF_CLASS_I_MHC                                                                                                           | 23  | 0.67151123 | 1.8357722 | 0.001919386 | 0.005733083 |
| PID_AVB3_OPN_PATHWAY                                                                                                                                                                        | 26  | 0.6540243  | 1.8352424 | 0.001984127 | 0.005735206 |
| GO_REGULATION_OF_CELL_CELL_ADHESION                                                                                                                                                         | 251 | 0.4557978  | 1.8346157 | 0           | 0.005766787 |
| GO_ENDODERM_FORMATION                                                                                                                                                                       | 28  | 0.63922477 | 1.8343753 | 0           | 0.005783437 |
| REACTOME_CELL_CYCLE_MITOTIC                                                                                                                                                                 | 265 | 0.44998667 | 1.8337945 | 0           | 0.005829661 |
| REACTOME_SEMAPHORIN_INTERACTIONS                                                                                                                                                            | 42  | 0.587494   | 1.832915  | 0           | 0.005905082 |
| REACTOME_DISEASES_OF_CARBOHYDRATE_METABOLISM                                                                                                                                                | 24  | -0.6559328 | -1.827554 | 0           | 0.005947209 |
| GO_REGULATION_OF_T_CELL_MEDIATED_IMMUNITY                                                                                                                                                   | 49  | 0.5698808  | 1.8312645 | 0           | 0.006075013 |
| REACTOME_EUKARYOTIC_TRANSLATION_INITIATION                                                                                                                                                  | 48  | 0.57738954 | 1.8311999 | 0           | 0.006083511 |
| GO_NEGATIVE_REGULATION_OF_ADAPTIVE_IMMUNE_RESPONSE                                                                                                                                          | 31  | 0.63257384 | 1.8307351 | 0           | 0.006085326 |
| REACTOME_CASPASE_ACTIVATION_VIA_EXTRINSIC_APOPTOTIC_SIGNALING_PATHWAY                                                                                                                       | 18  | 0.7177797  | 1.8309209 | 0.001941748 | 0.006087945 |
| BIOCARTA_CSK_PATHWAY                                                                                                                                                                        | 17  | 0.71609557 | 1.8287401 | 0.001984127 | 0.006249169 |
| GO_DICARBOXYLIC_ACID_TRANSMEMBRANE_TRANSPORTER_ACTIVITY                                                                                                                                     | 22  | -0.6791351 | -1.822935 | 0           | 0.006363778 |
| REACTOME_MITOTIC_METAPHASE_AND_ANAPHASE                                                                                                                                                     | 122 | 0.49667528 | 1.827227  | 0.001814882 | 0.006372224 |
| PID_ATR_PATHWAY                                                                                                                                                                             | 21  | 0.6881359  | 1.8273814 | 0           | 0.006382943 |
| REACTOME_DAP12_INTERACTIONS                                                                                                                                                                 | 29  | 0.6341069  | 1.8267044 | 0.001858736 | 0.006415246 |
| GO_POSITIVE_REGULATION_OF_AMYLOID_PRECURSOR_PROTEIN_CATABOLIC_PROCESS                                                                                                                       | 15  | 0.73009926 | 1.8260372 | 0.002083333 | 0.006472695 |
| SA_CASPASE_CASCADE                                                                                                                                                                          | 16  | 0.73951584 | 1.8255911 | 0           | 0.006486715 |
| GO_ENDOCYTIC_VESICLE                                                                                                                                                                        | 175 | 0.47094634 | 1.8246738 | 0           | 0.006540112 |
| GO_IMMUNOGLOBULIN_PRODUCTION_INVOLVED_IN_IMMUNOGLOBULIN_MEDIATED_IMMUNE_RESPONSE                                                                                                            | 28  | 0.6376654  | 1.8233571 | 0.003717472 | 0.006642843 |
| GO_NEGATIVE_REGULATION_OF_LYMPHOCYTE_ACTIVATION                                                                                                                                             | 96  | 0.5121954  | 1.8228024 | 0           | 0.006662953 |
| GO_LYMPHOCYTE_COSTIMULATION                                                                                                                                                                 | 39  | 0.60202575 | 1.8229483 | 0           | 0.006663786 |
| GO_ANTIBIOTIC_METABOLIC_PROCESS                                                                                                                                                             | 79  | -0.5223505 | -1.818837 | 0           | 0.006745469 |
| GO_TRANSLATIONAL_ELONGATION                                                                                                                                                                 | 62  | -0.5417367 | -1.816022 | 0           | 0.006860492 |
| GO_TRIGLYCERIDE_METABOLIC_PROCESS                                                                                                                                                           | 55  | -0.5515726 | -1.817113 | 0           | 0.006862422 |
| GO_NUCLEOBASE_CONTAINING_SMALL_MOLECULE_METABOLIC_PROCESS                                                                                                                                   | 376 | -0.4300331 | -1.816624 | 0           | 0.006863031 |
| GO_OXIDOREDUCTASE_ACTIVITY_ACTING_ON_PAAIRED_DONORS_WITH_INCORPORATION_OR_REDUCTION_OF_MOLECULAR_OXYGEN_REDUCED_FLAVIN_OR_FLAVOPROTEIN_AS_ONE_DONOR_AND_INCORPORATION_OF_ONE_ATOM_OF_OXYGEN | 22  | -0.6707935 | -1.816279 | 0.00204499  | 0.006876773 |
| GO_LEUKOCYTE_TETHERING_OR_ROLLING                                                                                                                                                           | 20  | 0.6804414  | 1.8194633 | 0.002020202 | 0.00693632  |

|                                                        |     |            |           |             |             |
|--------------------------------------------------------|-----|------------|-----------|-------------|-------------|
| REACTOME_CYTOSOLIC_SENSORS_OF_PATHOGEN_ASSOCIATED_DN   | 32  | 0.6140157  | 1.8191098 | 0.001841621 | 0.006942004 |
| A                                                      |     |            |           |             |             |
| GO_INTERFERON_ALPHA_PRODUCTION                         | 17  | 0.710266   | 1.81947   | 0.001923077 | 0.006955428 |
| BIOCARTA_FAS_PATHWAY                                   | 25  | 0.6552678  | 1.8180157 | 0           | 0.007017886 |
| GO_RNA_EXPORT_FROM_NUCLEUS                             | 74  | 0.5342862  | 1.8181518 | 0           | 0.00702296  |
| GO_PODOSOME                                            | 16  | 0.7269542  | 1.8182777 | 0.002020202 | 0.007031558 |
| PID_BETA_CATENIN_NUC_PATHWAY                           | 45  | 0.5673678  | 1.8173006 | 0           | 0.007072037 |
| GO_INNER_MITOCHONDRIAL_MEMBRANE_ORGANIZATION           | 16  | -0.7007189 | -1.813138 | 0.00422833  | 0.007093727 |
| REACTOME_ORC1_REMOVAL_FROM_CHROMATIN                   | 38  | 0.6045481  | 1.8167167 | 0           | 0.00712546  |
| REACTOME_HIV_INFECTION                                 | 133 | 0.4850139  | 1.8162671 | 0           | 0.0071338   |
| GO_AMMONIUM_TRANSMEMBRANE_TRANSPORTER_ACTIVITY         | 17  | -0.7129486 | -1.811156 | 0.003883495 | 0.007238688 |
| GO_CELL_CHEMOTAXIS                                     | 184 | 0.4669102  | 1.8146781 | 0           | 0.007242385 |
| GO_CELLULAR_RESPONSE_TO_COPPER_ION                     | 20  | -0.6786845 | -1.809976 | 0           | 0.007299055 |
| GO_LEUKOCYTE_CHEMOTAXIS                                | 139 | 0.48276192 | 1.8140587 | 0           | 0.007302082 |
| GO_CELLULAR_MODIFIED_AMINO_ACID_BIOSYNTHETIC_PROCESS   | 32  | -0.602761  | -1.810054 | 0.002004008 | 0.007320263 |
| GO_REGULATION_OF_IMMUNOGLOBULIN_PRODUCTION             | 39  | 0.57778597 | 1.8137004 | 0.001883239 | 0.007320433 |
| GO_COPII_COATED_ER_TO_GOLGI_TRANSPORT_VESICLE          | 57  | 0.55670387 | 1.8127408 | 0           | 0.007389587 |
| GO_POSITIVE_REGULATION_OF_NF_KAPPAB_TRANSCRIPTION_FACT | 96  | 0.50437796 | 1.8116136 | 0           | 0.007475102 |
| OR_ACTIVITY                                            |     |            |           |             |             |
| GO_REGULATION_OF_MYELOID_LEUKOCYTE_MEDIATED_IMMUNIT    | 47  | 0.5670843  | 1.8105953 | 0.001949318 | 0.007533532 |
| Y                                                      |     |            |           |             |             |
| REACTOME_INTERACTIONS_OF_REV_WITH_HOST_CELLULAR_PROT   | 23  | 0.6405576  | 1.8104428 | 0.001824818 | 0.007533972 |
| EINS                                                   |     |            |           |             |             |
| GO_REGULATION_OF_HEMOPOIESIS                           | 260 | 0.4509797  | 1.810183  | 0           | 0.007551226 |
| REACTOME_NS1_MEDIATED_EFFECTS_ON_HOST_PATHWAYS         | 25  | 0.6488481  | 1.8086427 | 0           | 0.00771664  |
| REACTOME_METABOLIC_DISORDERS_OF_BIOLOGICAL_OXIDATION_  | 23  | -0.6482832 | -1.805439 | 0.001988072 | 0.00771983  |
| ENZYMES                                                |     |            |           |             |             |
| GO_MYELOID_CELL_DIFFERENTIATION                        | 229 | 0.45503825 | 1.8082857 | 0           | 0.007740074 |
| REACTOME_CREATION_OF_C4_AND_C2_ACTIVATORS              | 21  | 0.6670426  | 1.8078175 | 0.001988072 | 0.00776313  |
| GO_STEROID_METABOLIC_PROCESS                           | 214 | -0.4511363 | -1.804314 | 0           | 0.007791968 |
| GO_MONOOXYGENASE_ACTIVITY                              | 62  | -0.5365728 | -1.802939 | 0           | 0.007946898 |
| GO_ORGANIC_CATION_TRANSPORT                            | 19  | -0.6935481 | -1.801471 | 0.003913894 | 0.008055529 |
| GO_RNA_DEPENDENT_DNA_BIOSYNTHETIC_PROCESS              | 33  | 0.6122596  | 1.8048507 | 0.002012072 | 0.008060598 |
| GO_WOUND_HEALING                                       | 355 | 0.43466786 | 1.8045862 | 0           | 0.008063118 |
| KEGG_TOLL_LIKE_RECEPTOR_SIGNALING_PATHWAY              | 70  | 0.53228736 | 1.8039811 | 0           | 0.00807098  |
| GO_REGULATION_OF_MYELOID_LEUKOCYTE_DIFFERENTIATION     | 70  | 0.5252759  | 1.804009  | 0           | 0.008091944 |
| GO_ANION_TRANSPORT                                     | 353 | -0.4305647 | -1.800319 | 0           | 0.00810034  |
| GO_PROTEIN_COMPLEX_INVOLVED_IN_CELL_ADHESION           | 23  | 0.65254295 | 1.8033429 | 0.002       | 0.008132584 |
| GO_OXIDOREDUCTASE_ACTIVITY_ACTING_ON_PAIRED_DONORS_W   | 93  | -0.5041464 | -1.80041  | 0           | 0.008134305 |
| ITH_INCORPORATION_OR_REDUCTION_OF_MOLECULAR_OXYGEN     |     |            |           |             |             |
| REACTOME_NUCLEAR_PORE_COMPLEX_NPC_DISASSEMBLY          | 23  | 0.67026865 | 1.8020684 | 0           | 0.00828968  |
| GO_CATALYTIC_STEP_2_SPLICEOSOME                        | 43  | 0.56931305 | 1.8000506 | 0           | 0.008475858 |
| GO_MYELOID_CELL_DEVELOPMENT                            | 41  | 0.5843202  | 1.7995642 | 0.001945525 | 0.00850322  |
| GO_POSITIVE_REGULATION_OF_CELL_KILLING                 | 40  | 0.5810219  | 1.799184  | 0           | 0.008537209 |
| REACTOME_CYTOCHROME_P450_ARRANGED_BY_SUBSTRATE_TYPE    | 42  | -0.5794048 | -1.794793 | 0           | 0.008617147 |
| GO_POSITIVE_REGULATION_OF_LYMPHOCYTE_MEDIATED_IMMUNI   | 61  | 0.5465996  | 1.7982309 | 0           | 0.008636211 |
| TY                                                     |     |            |           |             |             |
| GO_INNATE_IMMUNE_RESPONSE_ACTIVATING_CELL_SURFACE_REC  | 62  | 0.5382991  | 1.797281  | 0           | 0.008643181 |
| EPTOR_SIGNALING_PATHWAY                                |     |            |           |             |             |

|                                                                        |     |            |           |             |             |
|------------------------------------------------------------------------|-----|------------|-----------|-------------|-------------|
| GO_CELL_MATRIX_ADHESION                                                | 138 | 0.47979015 | 1.7979485 | 0           | 0.008653296 |
| GO_POSITIVE_REGULATION_OF_NIK_NF_KAPPAB_SIGNALING                      | 49  | 0.56424546 | 1.7973245 | 0           | 0.008661817 |
| GO_RESPONSE_TO_WOUNDING                                                | 425 | 0.4242234  | 1.7969698 | 0           | 0.008663098 |
| GO_AZUROPHIL_GRANULE_MEMBRANE                                          | 36  | 0.5939268  | 1.7966639 | 0           | 0.008664524 |
| GO_CYTOKINE_RECEPTOR_ACTIVITY                                          | 67  | 0.5322765  | 1.7967544 | 0           | 0.008676627 |
| GO_REGULATION_OF_LEUKOCYTE_MEDIATED_CYTOTOXICITY                       | 48  | 0.5651169  | 1.7974191 | 0           | 0.008677249 |
| GO_REGULATION_OF_LEUKOCYTE_MIGRATION                                   | 135 | 0.47428307 | 1.796158  | 0           | 0.008678138 |
| GO_MYD88_INDEPENDENT_TOLL_LIKE_RECEPTOR_SIGNALING_PATHWAY              | 19  | 0.7000581  | 1.7974368 | 0.001912046 | 0.008692833 |
| GO_POSITIVE_REGULATION_OF_T_CELL_MIGRATION                             | 21  | 0.68877095 | 1.7958722 | 0           | 0.008694793 |
| GO_FICOLIN_1_RICH_GRANULE_MEMBRANE                                     | 35  | 0.5986547  | 1.7956654 | 0.003780718 | 0.008705054 |
| REACTOME_SIGNALING_BY_PDGF                                             | 44  | 0.56618696 | 1.7955766 | 0.001945525 | 0.008709041 |
| GO_IRON_ION_BINDING                                                    | 89  | -0.4937702 | -1.792232 | 0           | 0.008866061 |
| GO_RUFFLE_MEMBRANE                                                     | 55  | 0.5445377  | 1.7928365 | 0           | 0.008950111 |
| GO_CELL_ADHESION_MEDIATED_BY_INTEGRIN                                  | 49  | 0.5640111  | 1.7924681 | 0           | 0.008956591 |
| GO_Glutamate_Metabolic_Process                                         | 19  | -0.6810638 | -1.790934 | 0.002028398 | 0.008977446 |
| GO_PROTEIN_DNA_COMPLEX_SUBUNIT_ORGANIZATION                            | 114 | 0.48963904 | 1.790718  | 0           | 0.009120597 |
| GO_CARBOHYDRATE_BIOSYNTHETIC_PROCESS                                   | 120 | -0.4807083 | -1.788734 | 0           | 0.009238484 |
| GO_REGULATION_OF_INFLAMMATORY_RESPONSE                                 | 207 | 0.45003125 | 1.7889309 | 0           | 0.009280657 |
| REACTOME_SIGNALING_BY_THE_B_CELL_RECEPTOR_BCR                          | 76  | 0.5159654  | 1.7881864 | 0           | 0.009287954 |
| GO_RESPONSE_TO_BACTERIUM                                               | 367 | 0.42727834 | 1.7884735 | 0           | 0.009294919 |
| REACTOME_APC_C_MEDIATED_DEGRADATION_OF_CELL_CYCLE_PROTEINS             | 44  | 0.5717625  | 1.7884923 | 0.001980198 | 0.009314466 |
| REACTOME_FCGR_ACTIVATION                                               | 19  | 0.6921594  | 1.7878002 | 0.001960784 | 0.009321244 |
| REACTOME_FcERI_MEDIATED_CA_2_MOBILIZATION                              | 33  | 0.6015926  | 1.7862061 | 0.003809524 | 0.009478954 |
| GO_TISSUE_REMODELING                                                   | 111 | 0.48429003 | 1.7848556 | 0           | 0.009607201 |
| REACTOME_Pyruvate_Metabolism                                           | 22  | -0.6403963 | -1.785021 | 0.006410257 | 0.009612306 |
| KEGG_REGULATION_OF_ACTIN_CYTOSKELETON                                  | 138 | 0.47183713 | 1.7837685 | 0           | 0.009696567 |
| GO_INTERLEUKIN_6_BIOSYNTHETIC_PROCESS                                  | 17  | 0.6971457  | 1.7838874 | 0.002012072 | 0.009701351 |
| GO_PATTERN_RECOGNITION_RECEPTOR_SIGNALING_PATHWAY                      | 117 | 0.4793498  | 1.7830663 | 0           | 0.009744167 |
| GO_HOST_CELLULAR_COMPONENT                                             | 42  | 0.5733153  | 1.7821639 | 0           | 0.009818866 |
| REACTOME_SEMA4D_IN_SEMAPHORIN_SIGNALING                                | 17  | 0.700698   | 1.7798057 | 0.005928854 | 0.010113544 |
| GO_POSITIVE_REGULATION_OF_NEUTROPHIL_MIGRATION                         | 21  | 0.6758559  | 1.7799802 | 0.001923077 | 0.010119459 |
| GO_NUCLEOSOME_ORGANIZATION                                             | 55  | 0.54217744 | 1.7792504 | 0           | 0.010123473 |
| GO_REGULATION_OF_T_HELPER_1_TYPE_IMMUNE_RESPONSE                       | 16  | 0.69973326 | 1.7785287 | 0.009823183 | 0.010130335 |
| GO_POSITIVE_REGULATION_OF_LYMPHOCYTE_MIGRATION                         | 25  | 0.64478844 | 1.7794329 | 0.001897533 | 0.010134935 |
| GO_IMMUNOGLOBULIN_RECEPTOR_BINDING                                     | 15  | 0.7431819  | 1.7784224 | 0           | 0.010139692 |
| GO_REGULATION_OF_T_CELL_MIGRATION                                      | 27  | 0.64187    | 1.7792804 | 0           | 0.010144448 |
| GO_REGULATION_OF_LYMPHOCYTE_MIGRATION                                  | 39  | 0.57309055 | 1.7789584 | 0           | 0.010144843 |
| KEGG_CYTOSOLIC_DNA_SENSING_PATHWAY                                     | 32  | 0.60753226 | 1.77862   | 0           | 0.010151146 |
| REACTOME_TRANSPORT_OF_MATURE_MRNAS_DERIVED_FROM_INTRONLESS_TRANSCRIPTS | 24  | 0.64779955 | 1.7786707 | 0.001956947 | 0.010172023 |
| GO_POSITIVE_REGULATION_OF_LEUKOCYTE_MIGRATION                          | 89  | 0.5079082  | 1.7777436 | 0           | 0.010184966 |
| GO_CHROMATIN_ASSEMBLY_OR_DISASSEMBLY                                   | 58  | 0.547014   | 1.7775028 | 0.002004008 | 0.010200051 |
| GO_BENZENE_CONTAINING_COMPOUND_METABOLIC_PROCESS                       | 16  | -0.7019629 | -1.779401 | 0.002155172 | 0.010372362 |
| GO_REGULATION_OF_TYPE_I_INTERFERON_MEDIATED_SIGNALING_PATHWAY          | 23  | 0.64355713 | 1.775071  | 0.005940594 | 0.010509428 |
| GO_SODIUM_ION_TRANSMEMBRANE_TRANSPORTER_ACTIVITY                       | 89  | -0.4972163 | -1.777582 | 0           | 0.010559179 |
| GO_ER_TO_GOLGI_TRANSPORT_VESICLE_MEMBRANE                              | 38  | 0.57888263 | 1.7742687 | 0           | 0.010618453 |
| GO_REGULATION_OF_NATURAL_KILLER_CELL_MEDIATED_IMMUNITY                 | 22  | 0.66482925 | 1.7739489 | 0.01183432  | 0.010644137 |
| GO_NEGATIVE_REGULATION_OF_CELL_ACTIVATION                              | 134 | 0.47610906 | 1.7737956 | 0           | 0.010649176 |



|                                                                                  |     |            |           |             |             |
|----------------------------------------------------------------------------------|-----|------------|-----------|-------------|-------------|
| GO_TOLL_LIKE_RECEPTOR_4_SIGNALING_PATHWAY                                        | 23  | 0.6498282  | 1.7731646 | 0.001996008 | 0.010694211 |
| GO_TRANSFORMING_GROWTH_FACTOR_BETA_PRODUCTION                                    | 31  | 0.61020535 | 1.7732034 | 0.004140787 | 0.01070993  |
| REACTOME_DIGESTION_AND_ABSORPTION                                                | 16  | -0.7030869 | -1.775882 | 0           | 0.010719122 |
| GO_MITOCHONDRIAL_LARGE_RIBOSOMAL_SUBUNIT                                         | 29  | -0.6225713 | -1.774786 | 0.002096436 | 0.010843786 |
| BIOCARTA_NUCLEARRS_PATHWAY                                                       | 25  | -0.6340479 | -1.773776 | 0.008264462 | 0.010936707 |
| GO_T_CELL_ACTIVATION_INVOLVED_IN_IMMUNE_RESPONSE                                 | 64  | 0.5202159  | 1.7709132 | 0           | 0.010968997 |
| GO_POSITIVE_REGULATION_OF_IMMUNOGLOBULIN_PRODUCTION                              | 25  | 0.64520985 | 1.7701758 | 0           | 0.011021363 |
| REACTOME_BINDING_AND_UPTAKE_OF_LIGANDS_BY_SCAVENGER_RECEPTORS                    | 42  | 0.5660968  | 1.7702341 | 0           | 0.011040596 |
| GO_REGULATION_OF_INTRINSIC_APOPTOTIC_SIGNALING_PATHWAY_IN_RESPONSE_TO_DNA_DAMAGE | 23  | 0.6338945  | 1.7696068 | 0.005660377 | 0.01106343  |
| GO_NEGATIVE_REGULATION_OF_SIGNAL_TRANSDUCTION_BY_P53_CLASS_MEDIATOR              | 18  | 0.6936956  | 1.7681127 | 0.001923077 | 0.011221292 |
| GO_RAC_PROTEIN_SIGNAL_TRANSDUCTION                                               | 25  | 0.63475597 | 1.7671977 | 0.003853565 | 0.01132919  |
| GO_POSITIVE_REGULATION_OF_MYELOID_CELL_DIFFERENTIATION                           | 54  | 0.54323393 | 1.7667719 | 0           | 0.01133292  |
| GO_REGULATION_OF_NEUROINFLAMMATORY_RESPONSE                                      | 22  | 0.650582   | 1.7669364 | 0.006097561 | 0.011341081 |
| GO_INTERLEUKIN_1_SECRETION                                                       | 33  | 0.58690107 | 1.7661003 | 0.003824092 | 0.011439742 |
| REACTOME_SUMOYLATION_OF_DNA_DAMAGE_RESPONSE_AND_REPAIR_PROTEINS                  | 41  | 0.5642523  | 1.7648242 | 0           | 0.011618169 |
| GO_MONOCARBOXYLIC_ACID_TRANSPORT                                                 | 102 | -0.4841091 | -1.768433 | 0           | 0.011685844 |
| GO_COLLAGEN_FIBRIL_ORGANIZATION                                                  | 36  | 0.5908755  | 1.763519  | 0.004056795 | 0.011741132 |
| GO_PHAGOCYTOSIS_RECOGNITION                                                      | 20  | 0.6686002  | 1.7635474 | 0.007751938 | 0.011764473 |
| PID_CXCR4_PATHWAY                                                                | 68  | 0.5290884  | 1.7631501 | 0           | 0.011775064 |
| REACTOME_SUMOYLATION_OF_UBIQUITINYLIATION_PROTEINS                               | 22  | 0.645972   | 1.7623106 | 0.002057613 | 0.011891376 |
| PID_HNF3B_PATHWAY                                                                | 35  | -0.58903   | -1.764668 | 0           | 0.01212409  |
| KEGG_ALZHEIMERS_DISEASE                                                          | 92  | -0.4892317 | -1.764907 | 0.00204499  | 0.012127907 |
| GO_ORGANELLE_ENVELOPE_LUMEN                                                      | 57  | -0.530922  | -1.764939 | 0           | 0.012165162 |
| REACTOME_MITOTIC_SPINDLE_CHECKPOINT                                              | 49  | 0.54876643 | 1.7597274 | 0.001964637 | 0.012337104 |
| GO_SPLICEOSOMAL_COMPLEX                                                          | 91  | 0.4932805  | 1.7590064 | 0           | 0.01241475  |
| REACTOME_FC_EPSILON_RECEPTOR_FCERI_SIGNALING                                     | 92  | 0.49194625 | 1.758513  | 0           | 0.012475075 |
| PID_ILK_PATHWAY                                                                  | 29  | 0.60724205 | 1.758026  | 0.001876173 | 0.012482024 |
| GO_LYMPHOCYTE_DIFFERENTIATION                                                    | 205 | 0.44227502 | 1.7582144 | 0           | 0.012484165 |
| GO_ENDODERM_DEVELOPMENT                                                          | 43  | 0.5696615  | 1.7574986 | 0           | 0.012567474 |
| GO_T_CELL_MEDIATED_CYTOTOXICITY                                                  | 31  | 0.6024553  | 1.7553166 | 0.003663004 | 0.012871271 |
| NABA_ECM_GLYCOPROTEINS                                                           | 103 | 0.48270774 | 1.7547929 | 0           | 0.01289586  |
| GO_REGULATORY_T_CELL_DIFFERENTIATION                                             | 20  | 0.67182493 | 1.754844  | 0           | 0.01291559  |
| GO_NUCLEAR_TRANSCRIBED_MRNA_CATABOLIC_PROCESS                                    | 82  | 0.5078205  | 1.7541586 | 0           | 0.012962633 |
| REACTOME_STIMULI_SENSING_CHANNELS                                                | 46  | -0.550761  | -1.758334 | 0           | 0.012999379 |
| GO_NEUTRAL_LIPID_CATABOLIC_PROCESS                                               | 22  | -0.6541477 | -1.757352 | 0.002118644 | 0.013148708 |
| GO_DETECTION_OF_BIOTIC_STIMULUS                                                  | 21  | 0.65392274 | 1.7527351 | 0.003868472 | 0.013200823 |
| GO_ACTIVE_TRANSMEMBRANE_TRANSPORTER_ACTIVITY                                     | 207 | -0.4390776 | -1.756766 | 0           | 0.013211611 |
| GO_T_CELL_DIFFERENTIATION                                                        | 146 | 0.45726708 | 1.752136  | 0           | 0.013272251 |
| GO_NATURAL_KILLER_CELL_ACTIVATION                                                | 48  | 0.55166596 | 1.7497706 | 0.00189394  | 0.013348261 |
| GO_CHEMOKINE_ACTIVITY                                                            | 32  | 0.589123   | 1.7495764 | 0           | 0.013355323 |
| PID_INTEGRIN2_PATHWAY                                                            | 24  | 0.6294019  | 1.7493919 | 0.001930502 | 0.013359412 |
| GO_INTRINSIC_COMPONENT_OF_ENDOPLASMIC_RETICULUM_MEMBRANE                         | 92  | 0.4882445  | 1.749152  | 0           | 0.013360998 |
| REACTOME_FCGAMMA_RECEPTOR_FCGR_DEPENDENT_PHAGOCYTOSIS                            | 70  | 0.5151949  | 1.7498382 | 0           | 0.013363081 |

|                                                                                 |     |            |           |             |             |
|---------------------------------------------------------------------------------|-----|------------|-----------|-------------|-------------|
| GO_POSITIVE_REGULATION_OF_LEUKOCYTE_MEDIATED_IMMUNITY                           | 86  | 0.49648687 | 1.7502176 | 0           | 0.013373482 |
| GO_U2_TYPE_SPLICEOSOMAL_COMPLEX                                                 | 42  | 0.56183314 | 1.7498938 | 0.00390625  | 0.013377871 |
| REACTOME_LAMININ_INTERACTIONS                                                   | 23  | 0.6471307  | 1.7484292 | 0.001992032 | 0.013384263 |
| GO_B_CELL_HOMEOSTASIS                                                           | 18  | 0.6716714  | 1.7506629 | 0.00625     | 0.013387995 |
| GO_MHC_PROTEIN_BINDING                                                          | 23  | 0.64274603 | 1.7508034 | 0.002008032 | 0.013389286 |
| REACTOME_TRANSPORT_OF_THE_SLBP_DEPENDANT_MATURE_MRNA                            | 23  | 0.64251196 | 1.750467  | 0.001937985 | 0.013389494 |
| GO_COLLAGEN_BINDING                                                             | 47  | 0.5601815  | 1.7486598 | 0.001992032 | 0.01339217  |
| GO_SPECIFIC_GRANULE                                                             | 116 | 0.47248897 | 1.7485305 | 0           | 0.013396327 |
| GO_CHEMOKINE_RECEPTOR_BINDING                                                   | 40  | 0.5702765  | 1.7510524 | 0.001934236 | 0.013398754 |
| GO_VESICLE_MEMBRANE                                                             | 468 | 0.41021836 | 1.7502186 | 0           | 0.013402119 |
| REACTOME_HEMOSTASIS                                                             | 415 | 0.41247654 | 1.7475965 | 0           | 0.013486397 |
| GO_CYTOSOLIC_LARGE_RIBOSOMAL_SUBUNIT                                            | 19  | 0.66782176 | 1.7476332 | 0.003976143 | 0.013509269 |
| KEGG_PRIMARY_IMMUNODEFICIENCY                                                   | 23  | 0.6403496  | 1.7471155 | 0.002012072 | 0.013511885 |
| REACTOME_INTERLEUKIN_4_AND_INTERLEUKIN_13_SIGNALING                             | 77  | 0.5045052  | 1.7461901 | 0           | 0.013598611 |
| GO_POSITIVE_REGULATION_OF_INTERLEUKIN_1_SECRETION                               | 19  | 0.66744274 | 1.7454202 | 0.003944773 | 0.013681741 |
| GO_ANTIGEN_PROCESSING_AND_PRESENTATION_OF_ENDOGENOUS_ANTIGEN                    | 20  | 0.6578534  | 1.7449242 | 0.002024292 | 0.013730197 |
| GO_INTRINSIC_APOPTOTIC_SIGNALING_PATHWAY_IN_RESPONSE_TO_DNA_DAMAGE              | 62  | 0.52187085 | 1.7439991 | 0           | 0.013854951 |
| GO_CARBOHYDRATE_CATABOLIC_PROCESS                                               | 135 | -0.4598354 | -1.751856 | 0           | 0.01394188  |
| REACTOME_INTERLEUKIN_2_FAMILY_SIGNALING                                         | 25  | 0.6356844  | 1.7417544 | 0.003853565 | 0.014164561 |
| GO_INTERFERON_GAMMA_SECRETION                                                   | 16  | 0.69633156 | 1.7412665 | 0.004106776 | 0.014204252 |
| GO_STEROID_HYDROXYLASE_ACTIVITY                                                 | 23  | -0.6218666 | -1.749942 | 0.00867679  | 0.014215243 |
| GO_LIGAND_ACTIVATED_TRANSCRIPTION_FACTOR_ACTIVITY                               | 29  | -0.6059482 | -1.749174 | 0.002155172 | 0.014278861 |
| GO_REGULATION_OF_EPITHELIAL_CELL_DIFFERENTIATION_INVOLVED_IN_KIDNEY_DEVELOPMENT | 15  | 0.69920295 | 1.7403276 | 0.001851852 | 0.014351461 |
| GO_RNA_CATABOLIC_PROCESS                                                        | 183 | 0.44624707 | 1.7397088 | 0           | 0.014424467 |
| GO_REGULATION_OF_T_CELL_RECEPTOR_SIGNALING_PATHWAY                              | 30  | 0.59924185 | 1.7382486 | 0.005769231 | 0.014591442 |
| GO_POSITIVE_REGULATION_OF_LEUKOCYTE_MEDIATED_CYTOTOXICITY                       | 34  | 0.5766268  | 1.7384597 | 0.001980198 | 0.014604005 |
| REACTOME_C_TYPE_LECTIN_RECEPTORS_CLRS                                           | 80  | 0.496283   | 1.7382658 | 0           | 0.014618627 |
| REACTOME_ELASTIC_FIBRE_FORMATION                                                | 34  | 0.58272123 | 1.7372041 | 0.001901141 | 0.01471126  |
| REACTOME_EXPORT_OF_VIRAL_RIBONUCLEOPROTEINS_FROM_NUCLEUS                        | 22  | 0.6278371  | 1.7373267 | 0.003921569 | 0.014720329 |
| GO_HOMOTYPIC_CELL_CELL_ADHESION                                                 | 57  | 0.52415705 | 1.7349658 | 0.00204918  | 0.014996194 |
| GO_MEMBRANE_RAFT_ORGANIZATION                                                   | 19  | 0.6833251  | 1.7350098 | 0.001945525 | 0.015013521 |
| GO_ACTIN_FILAMENT_ORGANIZATION                                                  | 222 | 0.43866095 | 1.7351197 | 0           | 0.015028438 |
| GO_TOXIN_METABOLIC_PROCESS                                                      | 18  | -0.6779697 | -1.743621 | 0.004065041 | 0.015104622 |
| GO_POSITIVE_REGULATION_OF_ORGANIC_ACID_TRANSPORT                                | 25  | -0.6186417 | -1.743843 | 0.002024292 | 0.015121008 |
| GO_ANION_TRANSMEMBRANE_TRANSPORT                                                | 163 | -0.4480861 | -1.742534 | 0           | 0.015235642 |
| REACTOME_ANTIMICROBIAL_PEPTIDES                                                 | 28  | 0.6054803  | 1.7334163 | 0.001890359 | 0.015236286 |
| GO_RESPONSE_TO_X_RAY                                                            | 19  | 0.6688233  | 1.7332189 | 0.001988072 | 0.015236569 |
| GO_RECEPTOR_COMPLEX                                                             | 239 | 0.43550164 | 1.732442  | 0           | 0.015341581 |
| GO_FC_EPSILON_RECEPTOR_SIGNALING_PATHWAY                                        | 79  | 0.50137    | 1.7318411 | 0           | 0.015426477 |
| GO_REGULATION_OF_ACTIN_FILAMENT_BASED_PROCESS                                   | 222 | 0.43523625 | 1.7314488 | 0           | 0.015477064 |
| REACTOME_RHO_GTPASES_ACTIVATE_WASPS_AND_WAVES                                   | 25  | 0.62911236 | 1.730885  | 0.005791506 | 0.015507275 |
| REACTOME_NUCLEAR_ENVELOPE_BREAKDOWN                                             | 36  | 0.58225185 | 1.7310176 | 0.005660377 | 0.015507622 |
| REACTOME_DNA_REPLICATION                                                        | 70  | 0.50490206 | 1.7300869 | 0           | 0.015624032 |
| GO_AMINO_ACID_TRANSMEMBRANE_TRANSPORTER_ACTIVITY                                | 39  | -0.5558227 | -1.737451 | 0           | 0.015840074 |

|                                                                  |     |            |           |             |             |
|------------------------------------------------------------------|-----|------------|-----------|-------------|-------------|
| GO_CELLULAR_RESPONSE_TO_CAMP                                     | 36  | -0.5770848 | -1.737621 | 0           | 0.015867341 |
| GO_MONOVALENT_INORGANIC_ANION_HOMEOSTASIS                        | 18  | -0.667864  | -1.738134 | 0.00203252  | 0.015914345 |
| GO_NADP_BINDING                                                  | 40  | -0.5600087 | -1.737758 | 0.002150538 | 0.015914964 |
| KEGG_METABOLISM_OF_XENOBIOTICS_BY_CYTOCHROME_P450                | 36  | -0.5828493 | -1.738324 | 0.004123712 | 0.015930975 |
| GO_TETRAPYRROLE_BINDING                                          | 88  | -0.4830247 | -1.736217 | 0           | 0.01595436  |
| GO_THIOLESTER_HYDROLASE_ACTIVITY                                 | 17  | -0.68898   | -1.736524 | 0.004081633 | 0.015962556 |
| GO_RIBOSE_PHOSPHATE_METABOLIC_PROCESS                            | 246 | -0.4234478 | -1.735565 | 0           | 0.016002763 |
| BIOCARTA_HIVNEF_PATHWAY                                          | 44  | 0.55103946 | 1.726695  | 0.003577818 | 0.01627975  |
| GO_REGULATION_OF_ACTIN_FILAMENT_ORGANIZATION                     | 143 | 0.46066338 | 1.7263892 | 0           | 0.016300688 |
| GO_RESPONSE_TO_XENOBIOTIC_STIMULUS                               | 185 | -0.4405798 | -1.733928 | 0           | 0.016325483 |
| REACTOME_RHO_GTPASES_ACTIVATE_PKNS                               | 22  | 0.6391379  | 1.7245789 | 0.001968504 | 0.016637258 |
| REACTOME_NUCLEAR_IMPORT_OF_REV_PROTEIN                           | 22  | 0.6315089  | 1.724029  | 0.001890359 | 0.016733032 |
| GO_SOLUTE_SODIUM_SYMPORTER_ACTIVITY                              | 47  | -0.5360341 | -1.731516 | 0           | 0.016743239 |
| GO_MACROPHAGE_MIGRATION                                          | 33  | 0.588556   | 1.7233459 | 0.001937985 | 0.016848687 |
| GO_MEMBRANE_REGION                                               | 208 | 0.43665704 | 1.7217547 | 0           | 0.017004633 |
| REACTOME_SNRNP_ASSEMBLY                                          | 28  | 0.61209834 | 1.7217656 | 0.001915709 | 0.01703535  |
| GO_NIK_NF_KAPPAB_SIGNALING                                       | 102 | 0.47274438 | 1.7219758 | 0           | 0.017036015 |
| PID_EPHB_FWD_PATHWAY                                             | 27  | 0.611388   | 1.7220553 | 0.002053388 | 0.017056772 |
| GO_HETEROTYPIC_CELL_CELL_ADHESION                                | 43  | 0.54503393 | 1.7209498 | 0.001980198 | 0.01711514  |
| GO_PROTEIN_LOCALIZATION_TO_CHROMOSOME                            | 32  | 0.59077275 | 1.7210696 | 0.001838235 | 0.017123548 |
| GO_HORMONE_METABOLIC_PROCESS                                     | 152 | -0.4517011 | -1.728464 | 0           | 0.017240884 |
| GO_REGULATION_OF_DEFENSE_RESPONSE_TO_VIRUS_BY_HOST               | 18  | 0.6698461  | 1.7200502 | 0.007984032 | 0.017249854 |
| PID_RB_1PATHWAY                                                  | 36  | 0.5735227  | 1.7201079 | 0           | 0.017268198 |
| GO_MULTI_ORGANISM_LOCALIZATION                                   | 36  | 0.56980914 | 1.7191292 | 0.003868472 | 0.017385365 |
| GO_ANTIMICROBIAL_HUMORAL_RESPONSE                                | 59  | 0.5182842  | 1.7191918 | 0.004264392 | 0.01740177  |
| REACTOME_S_PHASE                                                 | 87  | 0.48255366 | 1.718273  | 0           | 0.01745865  |
| GO_ACTIN_POLYMERIZATION_OR_DEPOLYMERIZATION                      | 113 | 0.46559805 | 1.7182943 | 0           | 0.017492224 |
| GO_P53_BINDING                                                   | 38  | 0.5589396  | 1.717332  | 0.001824818 | 0.017607458 |
| PID_FANCONI_PATHWAY                                              | 25  | 0.6137004  | 1.7170546 | 0.001956947 | 0.017634813 |
| REACTOME_GPVI_MEDIATED_ACTIVATION_CASCADE                        | 26  | 0.6171333  | 1.7157227 | 0.009861933 | 0.017824486 |
| GO_REGULATION_OF_LEUKOCYTE_ADHESION_TO_VASCULAR_ENDOTHELIAL_CELL | 15  | 0.69976133 | 1.7159754 | 0.004246285 | 0.017826762 |
| GO_CARBOHYDRATE_METABOLIC_PROCESS                                | 375 | -0.406332  | -1.725009 | 0           | 0.017936679 |
| GO_ONE_CARBON_METABOLIC_PROCESS                                  | 18  | -0.664619  | -1.724506 | 0.003952569 | 0.017987147 |
| REACTOME_METABOLISM_OF_STEROIDS                                  | 101 | -0.4730768 | -1.723882 | 0           | 0.01807577  |
| GO_POSITIVE_REGULATION_OF_ALPHA_BETA_T_CELL_ACTIVATION           | 44  | 0.5479378  | 1.7141314 | 0.004048583 | 0.018129326 |
| GO_POSITIVE_REGULATION_OF_TOLL_LIKE_RECEPTOR_SIGNALING_PATHWAY   | 15  | 0.6992984  | 1.713508  | 0.005628518 | 0.018216096 |
| GO_RAS_PROTEIN_SIGNAL_TRANSDUCTION                               | 235 | 0.4282045  | 1.7126923 | 0           | 0.018310033 |
| HALLMARK_HEME_METABOLISM                                         | 141 | -0.4538485 | -1.722184 | 0           | 0.018337274 |
| GO_ARP2_3_COMPLEX_MEDIATED_ACTIN_NUCLEATION                      | 18  | 0.6706848  | 1.7119555 | 0.009242144 | 0.01840867  |
| REACTOME_DNA_REPLICATION_PRE_INITIATION                          | 48  | 0.5285092  | 1.7115415 | 0           | 0.018485278 |
| GO_DNA_PACKAGING                                                 | 63  | 0.5143872  | 1.7108079 | 0           | 0.018562218 |
| GO_CELL_SUBSTRATE_ADHESION                                       | 208 | 0.43328717 | 1.710618  | 0           | 0.018580418 |
| GO_ANAPHASE_PROMOTING_COMPLEX_DEPENDENT_CATABOLIC_PROCESS        | 42  | 0.54591155 | 1.710831  | 0           | 0.01858763  |
| GO_REGULATION_OF_SYNCYTIUM_FORMATION_BY_PLASMA_Membrane_FUSION   | 22  | 0.63565695 | 1.710312  | 0.004032258 | 0.018620068 |
| GO_INTERLEUKIN_10_PRODUCTION                                     | 31  | 0.5839433  | 1.7100401 | 0.006122449 | 0.01865012  |
| REACTOME_COLLAGEN_FORMATION                                      | 55  | 0.53014433 | 1.7093813 | 0           | 0.018687889 |
| GO_METHYLTRANSFERASE_COMPLEX                                     | 47  | 0.54203796 | 1.7095352 | 0.003759399 | 0.01869415  |

|                                                                                                    |     |            |           |             |             |
|----------------------------------------------------------------------------------------------------|-----|------------|-----------|-------------|-------------|
| GO_AZUROPHIL_GRANULE_LUMEN                                                                         | 62  | 0.513894   | 1.708709  | 0           | 0.018705258 |
| GO_RHO_PROTEIN_SIGNAL_TRANSDUCTION                                                                 | 94  | 0.48124743 | 1.7090887 | 0           | 0.018715212 |
| GO_REGULATION_OF_TELOMERE_MAINTENANCE_VIA_TELOMERE_LENGTHENING                                     | 27  | 0.59400064 | 1.7087841 | 0.005847953 | 0.018737586 |
| GO_SYMPORTER_ACTIVITY                                                                              | 84  | -0.4925414 | -1.719594 | 0           | 0.018764533 |
| GO_POSITIVE_REGULATION_OF_LIPID_KINASE_ACTIVITY                                                    | 23  | 0.6220794  | 1.7069287 | 0.005905512 | 0.019083396 |
| GO_HORMONE_BIOSYNTHETIC_PROCESS                                                                    | 60  | -0.5063064 | -1.717752 | 0.002096436 | 0.019088516 |
| GO_REGULATION_OF_LEUKOCYTE_DEGRANULATION                                                           | 40  | 0.55796486 | 1.7067391 | 0.001964637 | 0.01909775  |
| REACTOME_TRANSPORT_OF_INORGANIC_CATIONS_ANIONS_AND_AMINO_ACIDS_OLIGOPEPTIDES                       | 64  | -0.5130606 | -1.717967 | 0           | 0.019100036 |
| REACTOME_SEPARATION_OF_SISTER_CHROMATIDS                                                           | 93  | 0.48118278 | 1.7058742 | 0           | 0.019241767 |
| REACTOME_COLLAGEN_BIOSYNTHESIS_AND_MODIFYING_ENZYMES                                               | 42  | 0.5380042  | 1.7048862 | 0.004016064 | 0.019415397 |
| REACTOME_TRANSPORT_OF_SMALL_MOLECULES                                                              | 406 | -0.4036948 | -1.716117 | 0           | 0.019428808 |
| GO_NUCLEOID                                                                                        | 25  | -0.6132253 | -1.715729 | 0.003883495 | 0.019431895 |
| GO_LIGASE_ACTIVITY                                                                                 | 70  | -0.495098  | -1.715297 | 0           | 0.019450855 |
| GO_REGULATION_OF_LYMPHOCYTE_DIFFERENTIATION                                                        | 102 | 0.469148   | 1.7037238 | 0           | 0.019622112 |
| GO_SYNCYTIUM_FORMATION                                                                             | 34  | 0.5820542  | 1.7025582 | 0.001904762 | 0.01971461  |
| GO_PROTEIN_LOCALIZATION_TO_ENDOPLASMIC_RETICULUM                                                   | 57  | 0.5311912  | 1.7027017 | 0           | 0.019724978 |
| GO_REGULATION_OF_T_CELL_DIFFERENTIATION                                                            | 84  | 0.48624858 | 1.702734  | 0.001956947 | 0.019756375 |
| GO_ACTIN_CYTOSKELETON_REORGANIZATION                                                               | 66  | 0.50576025 | 1.7027588 | 0           | 0.019787889 |
| REACTOME_SUMOYLATION_OF_SUMOYLATION_PROTEINS                                                       | 23  | 0.6182354  | 1.7017927 | 0           | 0.019860024 |
| PID_RXR_VDR_PATHWAY                                                                                | 15  | -0.683107  | -1.713091 | 0.006198347 | 0.019872596 |
| GO_NEGATIVE_REGULATION_OF_MYELOID_LEUKOCYTE_DIFFERENTIATION                                        | 30  | 0.5814878  | 1.7010523 | 0.007984032 | 0.019984335 |
| GO_ALPHA_BETA_T_CELL_PROLIFERATION                                                                 | 23  | 0.62332267 | 1.7008579 | 0           | 0.019987606 |
| GO_REGULATION_OF_DEFENSE_RESPONSE_TO_VIRUS_BY_VIRUS                                                | 22  | 0.6280562  | 1.6997366 | 0.008316008 | 0.02017854  |
| REACTOME_M_PHASE                                                                                   | 181 | 0.44161123 | 1.6998116 | 0           | 0.020201124 |
| GO_POSITIVE_REGULATION_OF_DNA_BINDING_TRANSCRIPTION_FACTORS_ACTIVITY                               | 154 | 0.44036636 | 1.6984742 | 0           | 0.02037765  |
| GO_TOLERANCE_INDUCION                                                                              | 15  | 0.690063   | 1.6986076 | 0.005952381 | 0.020386644 |
| GO_NEGATIVE_REGULATION_OF_B_CELL_ACTIVATION                                                        | 26  | 0.6032256  | 1.6981194 | 0.001937985 | 0.020439696 |
| GO_ION_TRANSMEMBRANE_TRANSPORTER_ACTIVITY                                                          | 426 | -0.3990083 | -1.710101 | 0           | 0.020473443 |
| GO_REGULATION_OF_VIRAL_ENTRY_INTO_HOST_CELL                                                        | 20  | 0.64029866 | 1.6973132 | 0.008032128 | 0.020614292 |
| REACTOME_PLATELET_ACTIVATION_SIGNALING_AND_AGGREGATION                                             | 181 | 0.43690464 | 1.6967962 | 0           | 0.020694118 |
| GO_CELL_SUBSTRATE_JUNCTION_ORGANIZATION                                                            | 66  | 0.5010454  | 1.6956283 | 0.005454545 | 0.020929307 |
| REACTOME_NUCLEOTIDE_BINDING_DOMAIN_LEUCINE_RICH_REPEATS_CONTAINING_RECEPTOR_NLR_SIGNALING_PATHWAYS | 27  | 0.59600735 | 1.6950967 | 0.008097166 | 0.021021899 |
| GO_DNA_DEPENDENT_ATPASE_ACTIVITY                                                                   | 58  | 0.51485425 | 1.6945528 | 0           | 0.021134786 |
| REACTOME_ROLE_OF_LAT2_NTAL_LAB_ON_CALCIIUM_MOBILIZATION                                            | 22  | 0.6226121  | 1.6938533 | 0.005882353 | 0.021242749 |
| GO_STEROID_DEHYDROGENASE_ACTIVITY                                                                  | 23  | -0.618545  | -1.705797 | 0.004048583 | 0.021314163 |
| GO_CENTROMERE_COMPLEX_ASSEMBLY                                                                     | 20  | 0.6494599  | 1.6932243 | 0.007889546 | 0.021348601 |
| GO_EPOXYGENASE_P450_PATHWAY                                                                        | 16  | -0.6862529 | -1.704855 | 0.004056795 | 0.021457104 |
| GO_REGULATION_OF_TUMOR_NECROSIS_FACTOR_MEDIATED_SIGNALING_PATHWAY                                  | 35  | 0.574664   | 1.6917504 | 0.003773585 | 0.021607991 |
| REACTOME_MOLECULES_ASSOCIATED_WITH_ELASTIC_FIBRES                                                  | 30  | 0.58564585 | 1.6917944 | 0           | 0.021639414 |
| GO_SITE_OF_DNA_DAMAGE                                                                              | 30  | 0.58314615 | 1.6913314 | 0.005780347 | 0.021684866 |
| GO_VESICLE_LUMEN                                                                                   | 235 | 0.4228141  | 1.6909518 | 0           | 0.021723604 |
| GO_FATTY_ACID_DERIVATIVE_BINDING                                                                   | 21  | -0.6357935 | -1.703245 | 0.00625     | 0.021750353 |

|                                                                                              |     |            |           |             |             |
|----------------------------------------------------------------------------------------------|-----|------------|-----------|-------------|-------------|
| GO_DNA_REPLICATION_INDEPENDENT_NUCLEOSOME_ORGANIZATION                                       | 21  | 0.63339216 | 1.6902903 | 0.0056926   | 0.021868045 |
| GO_REGULATION_OF_LYMPHOCYTE_APOPTOTIC_PROCESS                                                | 34  | 0.56208974 | 1.6894041 | 0.007782101 | 0.02204553  |
| GO_STEROID_HORMONE_BIOSYNTHETIC_PROCESS                                                      | 43  | -0.535329  | -1.701605 | 0.004149378 | 0.022054467 |
| GO_STRUCTURAL_CONSTITUENT_OF_NUCLEAR_PORE                                                    | 16  | 0.6751597  | 1.6887785 | 0.006072875 | 0.022092998 |
| GO_T_HELPER_1_TYPE_IMMUNE_RESPONSE                                                           | 25  | 0.6121235  | 1.6888067 | 0.001834862 | 0.022116018 |
| BIOCARTA_STATHMIN_PATHWAY                                                                    | 16  | 0.68765396 | 1.6888173 | 0.011881189 | 0.022152582 |
| GO_CATION_TRANSMEMBRANE_TRANSPORTER_ACTIVITY                                                 | 316 | -0.4085113 | -1.699009 | 0           | 0.022543734 |
| PID_IL4_2PATHWAY                                                                             | 40  | 0.5577841  | 1.6863905 | 0.001945525 | 0.022677004 |
| GO_ATP_METABOLIC_PROCESS                                                                     | 161 | -0.4405173 | -1.697629 | 0           | 0.022827353 |
| GO_REGULATION_OF_CYTOSKELETON_ORGANIZATION                                                   | 289 | 0.40936306 | 1.6855781 | 0           | 0.022840688 |
| GO_CELL_ADHESION_MEDIATOR_ACTIVITY                                                           | 35  | 0.5561966  | 1.6853932 | 0.005882353 | 0.022863315 |
| GO_ANTIGEN_PROCESSING_AND_PRESENTATION_OF_PEPTIDE_OR_POLYSACCHARIDE_ANTIGEN_VIA_MHC_CLASS_II | 76  | 0.48253965 | 1.6849443 | 0           | 0.022925982 |
| GO_REGULATION_OF_PEPTIDASE_ACTIVITY                                                          | 256 | 0.4160501  | 1.6841068 | 0           | 0.02301537  |
| GO_MEMBRANE_PROTEIN_PROTEOLYSIS                                                              | 33  | 0.5702751  | 1.6841645 | 0.001992032 | 0.02304621  |
| GO_REGULATION_OF_CENTROSOME_CYCLE                                                            | 24  | 0.6075114  | 1.6835492 | 0.0041841   | 0.023112783 |
| GO_DEFENSE_RESPONSE_TO_GRAM_NEGATIVE_BACTERIUM                                               | 38  | 0.56033796 | 1.6820844 | 0.00407332  | 0.023436677 |
| GO_ACTIVE_ION_TRANSMEMBRANE_TRANSPORTER_ACTIVITY                                             | 144 | -0.4480317 | -1.694868 | 0           | 0.023451755 |
| REACTOME_ASSEMBLY_OF_THE_PRE_REPLICATIVE_COMPLEX                                             | 36  | 0.5549041  | 1.6820966 | 0.007366483 | 0.023477016 |
| GO_INTRINSIC_APOPTOTIC_SIGNALING_PATHWAY_IN_RESPONSE_TO_DNA_DAMAGE_BY_P53_CLASS_MEDIATOR     | 26  | 0.6018673  | 1.6814866 | 0.00990099  | 0.023487804 |
| GO_GROWTH_PLATE_CARTILAGE_DEVELOPMENT                                                        | 21  | 0.62590677 | 1.6816144 | 0.014799154 | 0.023501705 |
| REACTOME_INTEGRIN_SIGNALING                                                                  | 18  | 0.656464   | 1.6812582 | 0.011952192 | 0.023502542 |
| GO_MEGAKARYOCYTE_DIFFERENTIATION                                                             | 35  | 0.5649942  | 1.6805964 | 0.005714286 | 0.023619357 |
| GO_REGULATION_OF_MYELOID_CELL_DIFFERENTIATION                                                | 127 | 0.45219064 | 1.6799878 | 0           | 0.023702452 |
| NABA_ECM_AFFILIATED                                                                          | 78  | 0.4860753  | 1.6800374 | 0.001795332 | 0.023727512 |
| GO_DETOXIFICATION                                                                            | 86  | -0.4730031 | -1.693282 | 0           | 0.023753159 |
| REACTOME_SIGNALING_BY_NOTCH4                                                                 | 49  | 0.5362325  | 1.6792799 | 0.001941748 | 0.023860235 |
| GO_POSITIVE_REGULATION_OF_RHO_PROTEIN_SIGNAL_TRANSDUCTION                                    | 15  | 0.6854918  | 1.6786959 | 0.010121457 | 0.02389693  |
| GO_REGULATION_OF_TYPE_2_IMMUNE_RESPONSE                                                      | 24  | 0.60287625 | 1.6788011 | 0.01369863  | 0.023902781 |
| GO_RECEPTOR_SIGNALING_PATHWAY_VIA_STAT                                                       | 89  | 0.47673452 | 1.6788723 | 0           | 0.023927987 |
| REACTOME_HCMV_EARLY_EVENTS                                                                   | 47  | 0.5293545  | 1.6781845 | 0.003752345 | 0.023968542 |
| GO_ACTIN_FILAMENT                                                                            | 68  | 0.49845013 | 1.6773127 | 0.001949318 | 0.024167396 |
| GO_NEGATIVE_REGULATION_OF_CELL_ADHESION                                                      | 182 | 0.4313139  | 1.6768949 | 0           | 0.024245316 |
| GO_NEGATIVE_REGULATION_OF_TUMOR_NECROSIS_FACTOR_SUPERFAMILY_CYTOKINE_PRODUCTION              | 36  | 0.5490038  | 1.6765596 | 0.003824092 | 0.024256341 |
| REACTOME_RESOLUTION_OF_SISTER_CHROMATID_COHESION                                             | 61  | 0.51010615 | 1.6765906 | 0.002       | 0.024294844 |
| REACTOME_SUMOYLATION_OF_CHROMATIN_ORGANIZATION_PROTEINS                                      | 35  | 0.5577472  | 1.6755427 | 0.007575758 | 0.024456032 |
| GO_U2_TYPE_CATALYTIC_STEP_2_SPLICEOSOME                                                      | 16  | 0.6715388  | 1.6742799 | 0.006160164 | 0.024636555 |
| GO_NEGATIVE_REGULATION_OF_LEUKOCYTE_DIFFERENTIATION                                          | 67  | 0.49863476 | 1.6746165 | 0.001941748 | 0.024637453 |
| GO_GROWTH_FACTOR_BINDING                                                                     | 91  | 0.47434017 | 1.674348  | 0           | 0.024656365 |
| REACTOME_SUMOYLATION_OF_RNA_BINDING_PROTEINS                                                 | 27  | 0.59146446 | 1.6735038 | 0.003649635 | 0.024776958 |
| GO_AMMONIUM_ION_METABOLIC_PROCESS                                                            | 115 | -0.4576749 | -1.688987 | 0           | 0.02480693  |
| GO_MEMBRANE_PROTEIN_ECTODOMAIN_PROTEOLYSIS                                                   | 28  | 0.5900332  | 1.6717826 | 0.011363637 | 0.025195071 |
| REACTOME_LEISHMANIA_INFECTION                                                                | 155 | 0.44170275 | 1.6713641 | 0           | 0.025263514 |
| REACTOME_TNFR2_NON_CANONICAL_NF_KB_PATHWAY                                                   | 60  | 0.50111026 | 1.670837  | 0.00204499  | 0.025321702 |
| GO_TELOMERE_MAINTENANCE_VIA_TELOMERE_LENGTHENING                                             | 38  | 0.5485078  | 1.6708436 | 0.001923077 | 0.025363557 |
| GO_TRIGLYCERIDE_CATABOLIC_PROCESS                                                            | 17  | -0.6581905 | -1.685867 | 0.006437768 | 0.025593976 |
| GO_ENTRY_INTO_HOST                                                                           | 88  | 0.47623435 | 1.6691828 | 0           | 0.025761737 |

|                                                                                                                                          |     |            |           |             |             |
|------------------------------------------------------------------------------------------------------------------------------------------|-----|------------|-----------|-------------|-------------|
| GO_HELICASE_ACTIVITY                                                                                                                     | 77  | 0.48549792 | 1.6689686 | 0           | 0.025776384 |
| REACTOME_METABOLISM_OF_PORPHYRINS                                                                                                        | 19  | -0.6499764 | -1.684268 | 0.006465518 | 0.025990862 |
| GO_REGULATION_OF_GLUCOSE_METABOLIC_PROCESS                                                                                               | 65  | -0.4967241 | -1.683882 | 0.002020202 | 0.026005458 |
| KEGG_PENTOSE_PHOSPHATE_PATHWAY                                                                                                           | 20  | -0.6385914 | -1.68329  | 0.012121212 | 0.02606809  |
| GO_EPIBOLY                                                                                                                               | 18  | 0.6534677  | 1.6674231 | 0.003891051 | 0.026158063 |
| GO_TERTIARY_GRANULE_MEMBRANE                                                                                                             | 49  | 0.51948285 | 1.6667968 | 0.005847953 | 0.026287587 |
| GO_POTASSIUM_ION_TRANSMEMBRANE_TRANSPORTER_ACTIVITY                                                                                      | 74  | -0.4825526 | -1.682061 | 0.002173913 | 0.02632065  |
| GO_CALCIUM_DEPENDENT_PROTEIN_BINDING                                                                                                     | 41  | 0.5481855  | 1.6663119 | 0.00390625  | 0.026380956 |
| GO_PRIMARY_ALCOHOL_METABOLIC_PROCESS                                                                                                     | 56  | -0.5149146 | -1.680574 | 0           | 0.026599173 |
| GO_AROMATASE_ACTIVITY                                                                                                                    | 17  | -0.6541303 | -1.680651 | 0.010460251 | 0.026671799 |
| PID_IL12_2PATHWAY                                                                                                                        | 44  | 0.5271382  | 1.6647032 | 0           | 0.026739782 |
| GO_ASPARTATE_FAMILY_AMINO_ACID_BIOSYNTHETIC_PROCESS                                                                                      | 17  | -0.6621228 | -1.679754 | 0.01004016  | 0.026749985 |
| GO_EXTRACELLULAR_MATRIX_BINDING                                                                                                          | 40  | 0.554153   | 1.6644546 | 0.005882353 | 0.026771484 |
| REACTOME_SIGNALING_BY_MET                                                                                                                | 49  | 0.52339387 | 1.6636944 | 0.003676471 | 0.026925553 |
| GO_SUBSTRATE_DEPENDENT_CELL_MIGRATION                                                                                                    | 19  | 0.639548   | 1.6633731 | 0.004008016 | 0.026942315 |
| GO_ACID_THIOL_LIGASE_ACTIVITY                                                                                                            | 16  | -0.6677406 | -1.677818 | 0.012552301 | 0.027140979 |
| GO_ACTIVATION_OF_PROTEIN_KINASE_B_ACTIVITY                                                                                               | 24  | -0.5969382 | -1.677407 | 0.004065041 | 0.027163396 |
| GO_PYRIDINE_CONTAINING_COMPOUND_METABOLIC_PROCESS                                                                                        | 20  | -0.6316068 | -1.677928 | 0.010752688 | 0.027202083 |
| PID_ADISS_2PATHWAY                                                                                                                       | 32  | 0.56771666 | 1.6619453 | 0.007366483 | 0.02731837  |
| GO_LYMPHOCYTE_CHEMOTAXIS                                                                                                                 | 38  | 0.5437863  | 1.6614903 | 0.005813954 | 0.027370797 |
| REACTOME_REGULATION_OF_GLUCOKINASE_BY_GLUCOKINASE REGULATORY_PROTEIN                                                                     | 20  | 0.6247465  | 1.6616005 | 0.004158004 | 0.027373804 |
| GO_POSITIVE_REGULATION_OF_B_CELL_PROLIFERATION                                                                                           | 27  | 0.5830027  | 1.6610013 | 0.018       | 0.027424812 |
| GO_CHROMATIN_REMODELING                                                                                                                  | 66  | 0.50036156 | 1.661102  | 0.001968504 | 0.027433846 |
| GO_POSITIVE_REGULATION_OF_CYTOSOLIC_CALCIUM_ION_CONCENTRATION_INVOLVED_IN_PHOSPHOLIPASE_C_ACTIVATING_G_PROTEIN_COUPLED_SIGNALING_PATHWAY | 15  | 0.6778151  | 1.6605473 | 0.010245902 | 0.027485646 |
| REACTOME_Glutathione_Conjugation                                                                                                         | 22  | -0.6182438 | -1.675791 | 0.008316008 | 0.02754587  |
| GO_POSITIVE_REGULATION_OF_T_CELL_MEDIATED_IMMUNITY                                                                                       | 36  | 0.5500166  | 1.65928   | 0.004008016 | 0.027746927 |
| BIOCARTA_IL2RB_PATHWAY                                                                                                                   | 25  | 0.60011923 | 1.6594102 | 0.009727626 | 0.027758416 |
| PID_FCER1_PATHWAY                                                                                                                        | 42  | 0.54421324 | 1.6589795 | 0.00591716  | 0.02780514  |
| GO_NAD_METABOLIC_PROCESS                                                                                                                 | 32  | -0.561177  | -1.673434 | 0.004201681 | 0.028139286 |
| GO_PLATELET_AGGREGATION                                                                                                                  | 44  | 0.52881545 | 1.6576602 | 0.001901141 | 0.028146572 |
| GO_PROTEASE_BINDING                                                                                                                      | 79  | 0.47766152 | 1.657006  | 0.001883239 | 0.028298333 |
| REACTOME_PROCESSING_OF_CAPPED_INTRON_CONTAINING_PRE-MRNAS                                                                                | 129 | 0.44954106 | 1.6556801 | 0           | 0.028596144 |
| REACTOME_INTERACTIONS_OF_VPR_WITH_HOST_CELLULAR_PROTEINS                                                                                 | 24  | 0.6074439  | 1.6557341 | 0.01459854  | 0.028617326 |
| GO_REGULATION_OF_INTRINSIC_APOPTOTIC_SIGNALING_PATHWAY_BY_P53_CLASS_MEDIATOR                                                             | 16  | 0.66174453 | 1.6552981 | 0.010548524 | 0.028660288 |
| GO_NUCLEAR_CHROMOSOME_TELOMERIC_REGION                                                                                                   | 53  | 0.51572186 | 1.6549635 | 0.001890359 | 0.028708553 |
| GO_RESPONSE_TO_CADMIUM_ION                                                                                                               | 46  | -0.522063  | -1.671012 | 0.006198347 | 0.028747227 |
| GO_RNA_LOCALIZATION                                                                                                                      | 120 | 0.44192514 | 1.6544493 | 0           | 0.028819472 |
| REACTOME_PHASE_II_CONJUGATION_OF_COMPOUNDS                                                                                               | 57  | -0.5047249 | -1.669879 | 0.00204499  | 0.029023852 |
| KEGG_CELL_CYCLE                                                                                                                          | 73  | 0.48795527 | 1.653131  | 0.001934236 | 0.029179372 |
| REACTOME_INTERLEUKIN_3_INTERLEUKIN_5_AND_GM-CSF_SIGNALING                                                                                | 29  | 0.5823517  | 1.6527202 | 0.01004016  | 0.029247236 |
| GO_TISSUE_HOMEOSTASIS                                                                                                                    | 123 | 0.44728768 | 1.6527749 | 0           | 0.02926307  |
| GO_PROTEIN_CONTAINING_COMPLEX_LOCALIZATION                                                                                               | 155 | 0.43692103 | 1.6522349 | 0           | 0.02932027  |
| GO_POSITIVE_REGULATION_OF_GLIOGENESIS                                                                                                    | 49  | 0.5167256  | 1.6522555 | 0           | 0.029364418 |

|                                                                                           |     |            |           |             |             |
|-------------------------------------------------------------------------------------------|-----|------------|-----------|-------------|-------------|
| GO_POSITIVE_REGULATION_OF_GRANULOCYTE_CHEMOTAXIS                                          | 20  | 0.628544   | 1.6514325 | 0.007905139 | 0.029405117 |
| GO_TYPE_2_IMMUNE_RESPONSE                                                                 | 27  | 0.5834718  | 1.6517044 | 0.01372549  | 0.029414903 |
| GO_NCRNA_EXPORT_FROM_NUCLEUS                                                              | 25  | 0.59304374 | 1.651551  | 0.010080645 | 0.029414933 |
| GO_CD8_POSITIVE_ALPHA_BETA_T_CELL_ACTIVATION                                              | 15  | 0.6641966  | 1.6507384 | 0.009708738 | 0.029545076 |
| PID_IL6_7_PATHWAY                                                                         | 35  | 0.5462061  | 1.6507871 | 0.005940594 | 0.029575257 |
| PID_BARD1_PATHWAY                                                                         | 18  | 0.6491995  | 1.6489297 | 0.011494253 | 0.029872658 |
| GO_POSITIVE_REGULATION_OF_STRIATED_MUSCLE_CELL_DIFFERENTIATION                            | 29  | 0.5739834  | 1.6490667 | 0.011650485 | 0.0298893   |
| BIOCARTA_NKT_PATHWAY                                                                      | 16  | 0.6548335  | 1.6491778 | 0.02020202  | 0.02991195  |
| HALLMARK_IL2_STAT5_SIGNALING                                                              | 137 | 0.43947825 | 1.6479244 | 0           | 0.030002715 |
| REACTOME_RHO_GTPASE_CYCLE                                                                 | 70  | 0.48099992 | 1.6480062 | 0.003868472 | 0.030013315 |
| GO_REGULATION_OF_ACTOMYOSIN_STRUCTURE_ORGANIZATION                                        | 56  | 0.5043977  | 1.6480678 | 0           | 0.03004196  |
| GO_NEGATIVE_REGULATION_OF_LEUKOCYTE_CELL_CELL_ADHESION                                    | 77  | 0.4842787  | 1.6481202 | 0.001876173 | 0.030066663 |
| GO_BLOOD_MICROPARTICLE                                                                    | 91  | 0.47186673 | 1.6475191 | 0           | 0.030094763 |
| GO_SITE_OF_DOUBLE_STRAND_BREAK                                                            | 22  | 0.6229223  | 1.6472013 | 0.005836576 | 0.03012005  |
| GO_MITOTIC_SPINDLE_ORGANIZATION                                                           | 68  | 0.48606208 | 1.6473087 | 0           | 0.030127225 |
| GO_DNA_REPLICATION                                                                        | 132 | 0.4369921  | 1.6462177 | 0           | 0.030322231 |
| GO_SUPRAMOLECULAR_FIBER_ORGANIZATION                                                      | 374 | 0.3949852  | 1.6462625 | 0           | 0.030356903 |
| GO_PROTON_TRANSMEMBRANE_TRANSPORT                                                         | 69  | -0.4808828 | -1.665026 | 0           | 0.030372726 |
| REACTOME_METABOLISM_OF_COFACTORS                                                          | 15  | -0.6853202 | -1.665265 | 0.009578544 | 0.0303882   |
| GO_CELL_DIVISION                                                                          | 269 | 0.40670043 | 1.6453578 | 0           | 0.030398691 |
| PID_EPO_PATHWAY                                                                           | 19  | 0.62937474 | 1.6455576 | 0.007604563 | 0.03043282  |
| REACTOME_REGULATION_OF_RUNX3_EXPRESSION_AND_ACTIVITY                                      | 29  | 0.5673454  | 1.6453688 | 0.003891051 | 0.030445028 |
| REACTOME_POSTMITOTIC_NUCLEAR_PORE_COMPLEX_NPC_REFORMATION                                 | 17  | 0.6468761  | 1.6449718 | 0.01183432  | 0.030463535 |
| REACTOME_NCAM1_INTERACTIONS                                                               | 27  | 0.5837777  | 1.6455748 | 0.005847953 | 0.03047545  |
| GO_NEGATIVE_REGULATION_OF_OSTEOCLAST_DIFFERENTIATION                                      | 18  | 0.64731294 | 1.6438049 | 0.016563147 | 0.030749628 |
| GO_CYTOKINETIC_PROCESS                                                                    | 19  | 0.62526304 | 1.6430713 | 0.007590133 | 0.03085016  |
| PID_PDGRB_PATHWAY                                                                         | 91  | 0.4574334  | 1.6431482 | 0.001996008 | 0.03086777  |
| GO_REGULATION_OF_DNA_DAMAGE_RESPONSE_SIGNAL_TRANSDUCTION_BY_P53_CLASS_MEDIATOR            | 20  | 0.61647075 | 1.6432831 | 0.007561437 | 0.030867858 |
| REACTOME_ANTIGEN_ACTIVATES_B_CELL_RECEPTOR_BCR_LEADING_TO_GENERATION_OF_SECOND_MESSENGERS | 34  | 0.54438573 | 1.6424474 | 0.006097561 | 0.030956248 |
| REACTOME_RHO_GTPASES_ACTIVATE_FORMINS                                                     | 69  | 0.4855962  | 1.6418437 | 0           | 0.030970514 |
| GO_NEGATIVE_REGULATION_OF_RESPONSE_TO_CYTOKINE_STIMULUS                                   | 38  | 0.5281351  | 1.6421542 | 0.008179959 | 0.030971384 |
| GO_REGULATION_OF_EXTRINSIC_APOPTOTIC_SIGNALING_PATHWAY_VIA_DEATH_DOMAIN_RECEPTORS         | 32  | 0.56113386 | 1.6418937 | 0           | 0.031003723 |
| GO_REGULATION_OF_ISOTYPE_SWITCHING                                                        | 15  | 0.66412085 | 1.6414666 | 0.015748031 | 0.031027723 |
| GO_T_CELL_CYTOKINE_PRODUCTION                                                             | 30  | 0.5663076  | 1.6410623 | 0.013618677 | 0.03103059  |
| GO_REGULATION_OF_ALPHA_BETA_T_CELL_ACTIVATION                                             | 58  | 0.5016621  | 1.6411732 | 0           | 0.031040734 |
| GO_MITOCHONDRIAL_SMALL_RIBOSOMAL_SUBUNIT                                                  | 15  | -0.6767206 | -1.662535 | 0.008179959 | 0.031058433 |
| GO_UBIQUITIN_LIKE_PROTEIN_CONJUGATING_ENZYME_ACTIVITY                                     | 24  | 0.5925576  | 1.6402733 | 0.009652509 | 0.031219352 |
| GO_REGULATION_OF_OSTEOCLAST_DIFFERENTIATION                                               | 35  | 0.5481051  | 1.640371  | 0.007920792 | 0.031229496 |
| PID_DELTA_NP63_PATHWAY                                                                    | 28  | 0.5702191  | 1.6399176 | 0.004040404 | 0.031279728 |
| GO_AMINO_ACID_TRANSPORT                                                                   | 79  | -0.4688059 | -1.661327 | 0           | 0.031322796 |
| PID_INTEGRIN_CS_PATHWAY                                                                   | 18  | 0.64209443 | 1.6391772 | 0.011976048 | 0.03145955  |

|                                                       |     |            |           |             |             |
|-------------------------------------------------------|-----|------------|-----------|-------------|-------------|
| REACTOME_GLYCEROPHOSPHOLIPID_BIOSYNTHESIS             | 64  | -0.4851106 | -1.660419 | 0           | 0.031478554 |
| GO_REGULATION_OF_PROTEIN_MATURATION                   | 41  | 0.52414757 | 1.6388953 | 0.003929273 | 0.031500343 |
| GO_LIPOPOLYSACCHARIDE_MEDIATED_SIGNALING_PATHWAY      | 43  | 0.52341    | 1.6376456 | 0.003795066 | 0.03181987  |
| GO_GLYCOSAMINOGLYCAN_BINDING                          | 139 | 0.4352392  | 1.6377804 | 0           | 0.031832643 |
| PID_IL12_STAT4_PATHWAY                                | 24  | 0.5974241  | 1.6367272 | 0.015209125 | 0.032034032 |
| GO_ORGANOPHOSPHATE_BIOSYNTHETIC_PROCESS               | 339 | -0.3947318 | -1.657597 | 0           | 0.032228097 |
| GO_VIRAL_GENE_EXPRESSION                              | 95  | 0.45232698 | 1.6359367 | 0           | 0.03225509  |
| GO_OXIDOREDUCTASE_ACTIVITY_ACTING_ON_THE_ALDEHYDE_OR_ | 27  | -0.5853839 | -1.656927 | 0.006355932 | 0.03231578  |
| OXO_GROUP_OF_DONORS_NAD_OR_NADP_AS_ACCEPTOR           |     |            |           |             |             |
| GO_ENDOPLASMIC_RETICULUM_LUMEN                        | 198 | 0.4192515  | 1.6350224 | 0           | 0.032378357 |
| REACTOME_DAP12_SIGNALING                              | 24  | 0.59907246 | 1.6350676 | 0.013944224 | 0.032403316 |
| GO_PLASMA_MEMBRANE_PROTEIN_COMPLEX                    | 327 | 0.3962256  | 1.6351405 | 0           | 0.032424547 |
| GO_POSITIVE_REGULATION_OF_CHEMOTAXIS                  | 90  | 0.46642783 | 1.6345491 | 0.005434783 | 0.032471694 |
| GO_TAXIS                                              | 364 | 0.38955513 | 1.6341765 | 0           | 0.032542385 |
| KEGG_NOD_LIKE_RECEPTOR_SIGNALING_PATHWAY              | 39  | 0.54051137 | 1.6338311 | 0.00754717  | 0.03261451  |
| GO_VITAMIN_TRANSPORT                                  | 23  | -0.6002029 | -1.654818 | 0.007984032 | 0.032886844 |
| GO_PHOSPHATE_ION_TRANSPORT                            | 17  | -0.6591628 | -1.65439  | 0.016494846 | 0.032908324 |
| PID_KIT_PATHWAY                                       | 37  | 0.5393688  | 1.6319063 | 0           | 0.033135515 |
| GO_NEGATIVE_REGULATION_OF_CYTOKINE_SECRETION          | 40  | 0.53594    | 1.6319208 | 0.002004008 | 0.033180203 |
| GO_RUFFLE                                             | 109 | 0.44689873 | 1.6312058 | 0.001831502 | 0.03328109  |
| GO_POSITIVE_REGULATION_OF_INTERLEUKIN_10_PRODUCTION   | 19  | 0.6141385  | 1.6310635 | 0.016064256 | 0.033286832 |
| GO_CARBOXY_LYASE_ACTIVITY                             | 26  | -0.5728464 | -1.652138 | 0.01443299  | 0.03353499  |
| GO_RESPONSE_TO_MOLECULE_OF_BACTERIAL_ORIGIN           | 221 | 0.41362956 | 1.6298712 | 0           | 0.03363266  |
| GO_INTERLEUKIN_4_PRODUCTION                           | 21  | 0.60352343 | 1.628937  | 0.013358778 | 0.03392588  |
| GO_REGULATION_OF_ACUTE_INFLAMMATORY_RESPONSE          | 27  | 0.575804   | 1.6285123 | 0.015625    | 0.034032244 |
| GO_CADHERIN_BINDING                                   | 198 | 0.4118432  | 1.6282868 | 0           | 0.034042396 |
| GO_CHROMOSOMAL_REGION                                 | 151 | 0.42594764 | 1.6271517 | 0           | 0.034180533 |
| GO_MITOCHONDRIAL_TRANSPORT                            | 135 | -0.4362725 | -1.650041 | 0           | 0.034187943 |
| PID_RAC1_PATHWAY                                      | 35  | 0.54393953 | 1.6276546 | 0.013307985 | 0.03420806  |
| KEGG_P53_SIGNALING_PATHWAY                            | 46  | 0.5149562  | 1.6272374 | 0.005649718 | 0.034211285 |
| GO_RECEPTOR_TYROSINE_KINASE_BINDING                   | 42  | 0.5255388  | 1.6274996 | 0.003809524 | 0.034227036 |
| REACTOME_APC_C_CDH1_MEDIATED_DEGRADATION_OF_CDC20_A   | 37  | 0.53527874 | 1.6273237 | 0.005836576 | 0.034233015 |
| ND_OTHER_APC_C_CDH1_TARGETED_PROTEINS_IN_LATE_MITOSIS |     |            |           |             |             |
| _EARLY_G1                                             |     |            |           |             |             |
| GO_POSITIVE_REGULATION_OF_CELL_CYCLE_PHASE_TRANSITION | 53  | 0.5014605  | 1.6264329 | 0.005791506 | 0.03438263  |
|                                                       |     |            |           |             |             |
| GO_SMALL_GTPASE_MEDIATED_SIGNAL_TRANSDUCTION          | 299 | 0.39655417 | 1.6253704 | 0           | 0.03466542  |
| PID_BCR_5PATHWAY                                      | 47  | 0.5132193  | 1.6247544 | 0           | 0.034734827 |
| GO_POLYOL_METABOLIC_PROCESS                           | 74  | -0.4785259 | -1.647974 | 0           | 0.034739148 |
| REACTOME_G2_M_DNA_DAMAGE_CHECKPOINT                   | 33  | 0.5539405  | 1.6249839 | 0.005535055 | 0.03474417  |
| GO_ALPHA_BETA_T_CELL_ACTIVATION                       | 89  | 0.45929885 | 1.6248474 | 0.001883239 | 0.03475513  |
| GO_APOPTOTIC_SIGNALING_PATHWAY                        | 364 | 0.3894582  | 1.623684  | 0           | 0.035035394 |
| REACTOME_RNA_POLYMERASE_II_TRANSCRIPTION_TERMINATION  | 35  | 0.55482125 | 1.622764  | 0.005847953 | 0.035182204 |
|                                                       |     |            |           |             |             |
| GO_PROTEIN_TYROSINE_KINASE_BINDING                    | 59  | 0.49371836 | 1.6228666 | 0.003968254 | 0.03520669  |
| REACTOME_TRANSCRIPTIONAL_REGULATION_BY_RUNX3          | 52  | 0.49751356 | 1.6229993 | 0.003891051 | 0.035207454 |
| GO_DOUBLE_STRANDED_RNA_BINDING                        | 45  | 0.51841855 | 1.6223491 | 0.003533569 | 0.035223845 |
| HALLMARK_APOPTOSIS                                    | 123 | 0.43799427 | 1.6224346 | 0           | 0.035242934 |
| GO_PROTEIN_HOMOTETRAMERIZATION                        | 64  | -0.4809521 | -1.646007 | 0.002079002 | 0.035287995 |
| HALLMARK_UV_RESPONSE_DN                               | 103 | 0.44605187 | 1.6208917 | 0           | 0.03564079  |
| GO_EXTRINSIC_COMPONENT_OF_CYTOPLASMIC_SIDE_OF_PLASMA  | 49  | 0.5057868  | 1.6207061 | 0.008179959 | 0.035657387 |
| _MEMBRANE                                             |     |            |           |             |             |



|                                                                       |     |            |           |             |             |
|-----------------------------------------------------------------------|-----|------------|-----------|-------------|-------------|
| GO_NEGATIVE_REGULATION_OF_INTRINSIC_APOPTOTIC_SIGNALIN                | 19  | 0.62344754 | 1.6208954 | 0.013806706 | 0.035691056 |
| G_PATHWAY_IN_RESPONSE_TO_DNA_DAMAGE                                   |     |            |           |             |             |
| PID_NOTCH_PATHWAY                                                     | 29  | 0.5538943  | 1.620174  | 0.009596929 | 0.03575667  |
| GO_POSITIVE_REGULATION_OF_CD4_POSITIVE_ALPHA_BETA_T_CELL_ACTIVATION   | 26  | 0.58169454 | 1.6202042 | 0.00591716  | 0.03580333  |
| GO_CHROMATIN_REMODELING_AT_CENTROMERE                                 | 15  | 0.65095437 | 1.6196016 | 0.022088353 | 0.035896704 |
| GO_POSITIVE_REGULATION_OF_SUPRAMOLECULAR_FIBER_ORGANIZATION           | 116 | 0.44106877 | 1.6171997 | 0           | 0.03650841  |
| KEGG_SMALL_CELL_LUNG_CANCER                                           | 54  | 0.49714977 | 1.6172752 | 0.003868472 | 0.036532436 |
| GO_CYTOKINE_RECEPTOR_BINDING                                          | 160 | 0.4224501  | 1.6174729 | 0           | 0.03656298  |
| GO_MACROPHAGE_CHEMOTAXIS                                              | 24  | 0.5788178  | 1.6173296 | 0.009487666 | 0.036567237 |
| REACTOME_EPHRIN_SIGNALING                                             | 15  | 0.66208947 | 1.6175774 | 0.011673152 | 0.03657459  |
| GO_EXTRINSIC_COMPONENT_OF_PLASMA_MEMBRANE                             | 88  | 0.4591833  | 1.6162782 | 0.001919386 | 0.036684252 |
| GO_POSITIVE_REGULATION_OF_LOCOMOTION                                  | 353 | 0.3901379  | 1.6164501 | 0           | 0.036687165 |
| REACTOME_TOLL_LIKE_RECEPTOR_CASCADES                                  | 89  | 0.46181047 | 1.6158267 | 0.002053388 | 0.03674768  |
| GO_SINGLE_STRANDED_RNA_BINDING                                        | 44  | 0.5169246  | 1.6158758 | 0.005649718 | 0.03678087  |
| GO_THIOESTER_BIOSYNTHETIC_PROCESS                                     | 37  | -0.5343512 | -1.641197 | 0.00631579  | 0.0368379   |
| GO_RECEPTOR_MEDIATED_ENDOCYTOSIS                                      | 173 | 0.41384614 | 1.6148843 | 0           | 0.03693993  |
| GO_MICROTUBULE_CYTOSKELETON_ORGANIZATION_INVOLVED_IN_MITOSIS          | 84  | 0.45888123 | 1.6150625 | 0           | 0.03697138  |
| GO_AXONAL_GROWTH_CONE                                                 | 17  | 0.63925946 | 1.6149253 | 0.013944224 | 0.036978506 |
| GO_MITOCHONDRIAL_RNA_METABOLIC_PROCESS                                | 26  | -0.5775701 | -1.640423 | 0.013645224 | 0.037016585 |
| GO_NEGATIVE_REGULATION_OF_ANTIGEN_RECEPTOR_MEDIATED_SIGNALING_PATHWAY | 21  | 0.6034495  | 1.6144099 | 0.019157087 | 0.037038855 |
| REACTOME_INTRINSIC_PATHWAY_FOR_APOPTOSIS                              | 30  | 0.5567535  | 1.6141622 | 0.005976096 | 0.037095573 |
| GO_CELL_VOLUME_HOMEOSTASIS                                            | 18  | -0.6218422 | -1.639549 | 0.014522822 | 0.037237104 |
| GO_REGULATION_OF_T_CELL_MEDIATED_CYTOTOXICITY                         | 24  | 0.59760606 | 1.6134889 | 0.015065913 | 0.03729924  |
| GO_POSITIVE_REGULATION_OF_ACTIN_FILAMENT_POLYMERIZATION               | 49  | 0.505505   | 1.6130904 | 0.005825243 | 0.03737961  |
| GO_NEGATIVE_REGULATION_OF_EXTRINSIC_APOPTOTIC_SIGNALIN                | 22  | 0.6050856  | 1.6123259 | 0.015810277 | 0.03762152  |
| G_PATHWAY_VIA_DEATH_DOMAIN_RECEPTORS                                  |     |            |           |             |             |
| GO_NEGATIVE_REGULATION_OF_RESPONSE_TO_DNA_DAMAGE_STIMULUS             | 37  | 0.5363682  | 1.6109275 | 0.007858546 | 0.038029104 |
| GO_VASCULAR_ENDOTHELIAL_GROWTH_FACTOR_RECEPTOR_SIGNALING_PATHWAY      | 66  | 0.47912037 | 1.6107032 | 0           | 0.03805908  |
| GO_SODIUM_ION_TRANSPORT                                               | 132 | -0.4362909 | -1.635797 | 0.002178649 | 0.038126606 |
| GO_RECOMBINATIONAL_REPAIR                                             | 49  | 0.49860835 | 1.6103325 | 0.003883495 | 0.03815036  |
| GO_ORGANIC_HYDROXY_COMPOUND_BIOSYNTHETIC_PROCESS                      | 176 | -0.4203679 | -1.636821 | 0           | 0.038159043 |
| GO_TRANSFERASE_ACTIVITY_TRANSFERRING_SULFUR_CONTAINING_GROUPS         | 38  | -0.5358778 | -1.636411 | 0.00845666  | 0.038185485 |
| GO_STEROID_BINDING                                                    | 69  | -0.4674282 | -1.635839 | 0.00203252  | 0.038236786 |
| REACTOME_G1_S_DNA_DAMAGE_CHECKPOINTS                                  | 32  | 0.5482114  | 1.6097124 | 0.007751938 | 0.03832659  |
| GO_G_PROTEIN_ALPHA_SUBUNIT_BINDING                                    | 17  | 0.63892394 | 1.6094191 | 0.014227643 | 0.038385812 |
| GO_RESPONSE_TO_TUMOR_NECROSIS_FACTOR                                  | 184 | 0.41045377 | 1.6085163 | 0           | 0.0385454   |
| GO_POSITIVE_REGULATION_OF_RECEPTOR_MEDIATED_ENDOCYTOSIS               | 34  | 0.5432347  | 1.6082209 | 0.012635379 | 0.03856226  |
| SIG_BCR_SIGNALING_PATHWAY                                             | 32  | 0.5496022  | 1.608558  | 0.01192843  | 0.038578596 |
| GO_LIPID_HOMEOSTASIS                                                  | 85  | -0.4616696 | -1.634314 | 0.002283105 | 0.038593624 |
| GO_PRODUCTION_OF_MOLECULAR_MEDIATOR_INVOLVED_IN_INFLAMMATORY_RESPONSE | 50  | 0.50569135 | 1.6082592 | 0           | 0.03859363  |
| GO_BONE_REMODELING                                                    | 58  | 0.48695788 | 1.6085836 | 0           | 0.038615298 |
| KEGG_UBIQUITIN_MEDIATED_PROTEOLYSIS                                   | 71  | 0.4659358  | 1.607626  | 0.001980198 | 0.038710427 |

|                                                                     |     |            |           |             |             |
|---------------------------------------------------------------------|-----|------------|-----------|-------------|-------------|
| GO_ORGANOPHOSPHATE_CATABOLIC_PROCESS                                | 79  | -0.4700698 | -1.633433 | 0           | 0.038811613 |
| GO_POLYOL_BIOSYNTHETIC_PROCESS                                      | 46  | -0.5100702 | -1.632708 | 0.004310345 | 0.03887939  |
| GO_INORGANIC_ANION_TRANSMEMBRANE_TRANSPORTER_ACTIVITY               | 77  | -0.4689728 | -1.632299 | 0.002079002 | 0.03891414  |
| GO_POSITIVE_REGULATION_OF_LIPID_CATABOLIC_PROCESS                   | 16  | -0.6561223 | -1.632786 | 0.009920635 | 0.038965836 |
| GO_SPECIFIC_GNANULE_LUMEN                                           | 46  | 0.5127445  | 1.6063665 | 0.003846154 | 0.0391333   |
| GO_FOCAL_ADHESION_ASSEMBLY                                          | 55  | 0.4933232  | 1.606002  | 0.007532957 | 0.03916056  |
| GO_POSITIVE_REGULATION_OF_PEPTIDE_SECRETION                         | 173 | 0.41476566 | 1.6061049 | 0           | 0.039170254 |
| REACTOME_METABOLISM_OF_RNA                                          | 323 | 0.3903906  | 1.605335  | 0           | 0.0392218   |
| GO_DEFENSE_RESPONSE_TO_GRAM_POSITIVE_BACTERIUM                      | 41  | 0.52031004 | 1.6056498 | 0.009784736 | 0.03925074  |
| GO_MITOTIC_SPINDLE_ASSEMBLY                                         | 38  | 0.53248066 | 1.6053722 | 0.005952381 | 0.03926228  |
| GO_REGULATION_OF_SYNAPSE_STRUCTURE_OR_ACTIVITY                      | 123 | 0.43083322 | 1.6053865 | 0           | 0.039311424 |
| GO_SULFUR_COMPOUND_BIOSYNTHETIC_PROCESS                             | 124 | -0.437171  | -1.630015 | 0           | 0.0396165   |
| GO_STEROL_METABOLIC_PROCESS                                         | 108 | -0.4503009 | -1.629135 | 0.002040816 | 0.0398128   |
| GO_EXOGENOUS_DRUG_CATABOLIC_PROCESS                                 | 15  | -0.6577488 | -1.6284   | 0.017208412 | 0.04002033  |
| REACTOME_CONSTITUTIVE_SIGNALING_BY_AKT1_E17K_IN_CANCER              | 16  | -0.6506354 | -1.627785 | 0.022       | 0.04011454  |
| KEGG_B_CELL_RECEPTOR_SIGNALING_PATHWAY                              | 53  | 0.4959875  | 1.6018319 | 0.005952381 | 0.040475037 |
| REACTOME_RRNA_PROCESSING                                            | 90  | 0.4508374  | 1.6013    | 0           | 0.04054117  |
| PID_EPHRINB_REV_PATHWAY                                             | 23  | 0.58407366 | 1.601409  | 0.014553014 | 0.04056609  |
| GO_NUCLEUS_LOCALIZATION                                             | 15  | -0.6437534 | -1.626193 | 0.012658228 | 0.040613063 |
| REACTOME_MAPK6_MAPK4_SIGNALING                                      | 48  | 0.50661784 | 1.6009412 | 0.003809524 | 0.040655967 |
| REACTOME_PEPTIDE_LIGAND_BINDING_RECEPTORS                           | 113 | 0.43261304 | 1.6006613 | 0           | 0.040714223 |
| HALLMARK_WNT_BETA_CATENIN_SIGNALING                                 | 23  | 0.5914528  | 1.5989043 | 0.008421052 | 0.041263983 |
| GO_HISTONE_METHYLTRANSFERASE_COMPLEX                                | 34  | 0.54170066 | 1.5989963 | 0.006012024 | 0.04128303  |
| REACTOME_INFECTON_WITH_MYCOBACTERIUM_TUBERCULOSIS                   | 15  | 0.6441156  | 1.5982711 | 0.017578125 | 0.04141259  |
| REACTOME_TRANSCRIPTIONAL_REGULATION_BY_RUNX1                        | 90  | 0.44938174 | 1.598329  | 0.002016129 | 0.04144518  |
| KEGG_FC_GAMMA_R_MEDIATED_PHAGOCYTOSIS                               | 65  | 0.47194463 | 1.5978522 | 0.001890359 | 0.041525576 |
| GO_ACID_SECRETION                                                   | 78  | -0.461407  | -1.62371  | 0           | 0.041613452 |
| GO_GLYCEROLIPID_METABOLIC_PROCESS                                   | 220 | -0.4049437 | -1.622099 | 0           | 0.04210309  |
| REACTOME_HCMV_INFECTON                                              | 56  | 0.4847025  | 1.5957859 | 0.002012072 | 0.042276405 |
| PID_SYNDECAN_4_PATHWAY                                              | 27  | 0.56511563 | 1.5943755 | 0.016853932 | 0.042687546 |
| GO_REGULATION_OF_ACTIN_FILAMENT_BUNDLE_ASSEMBLY                     | 59  | 0.48892364 | 1.5944076 | 0.007766991 | 0.04273858  |
| GO_GOLGI_ASSOCIATED_VESICLE_MEMBRANE                                | 64  | 0.47445837 | 1.5939385 | 0.005607477 | 0.042765006 |
| KEGG_T_CELL_RECEPTOR_SIGNALING_PATHWAY                              | 67  | 0.47236532 | 1.5944214 | 0.005964215 | 0.04278804  |
| GO_ENDOCYTOSIS                                                      | 349 | 0.38563508 | 1.5939392 | 0           | 0.042820983 |
| GO_CYTOSOLIC_RIBOSOME                                               | 37  | 0.52975917 | 1.5933164 | 0.008163265 | 0.04288883  |
| REACTOME_THE_ROLE_OF_GTSE1_IN_G2_M_PROGRESSION_AFTER_G2_CHECKPOINT  | 47  | 0.50225216 | 1.5934625 | 0.005758158 | 0.0428912   |
| GO_EYE_PHOTORECEPTOR_CELL_DEVELOPMENT                               | 17  | -0.6335522 | -1.618824 | 0.019455252 | 0.043273095 |
| REACTOME_NUCLEAR_ENVELOPE_NE_REASSEMBLY                             | 50  | 0.49230915 | 1.5918959 | 0.007707129 | 0.043377    |
| GO_MYOBLAST_FUSION                                                  | 24  | 0.5881102  | 1.5916802 | 0.010080645 | 0.043405645 |
| REACTOME_CROSS_PRESENTATION_OF_SOLUBLE_EXOGENOUS_ANTIGENS_ENDOSOMES | 29  | 0.54638827 | 1.5919424 | 0.012145749 | 0.043413416 |
| GO_POSITIVE_REGULATION_OF_PHOSPHOLIPID_METABOLIC_PROCESS            | 31  | 0.53890836 | 1.5909486 | 0.009433962 | 0.043638278 |
| GO_REGULATION_OF_T_CELL_CYTOKINE_PRODUCTION                         | 26  | 0.5686777  | 1.5906981 | 0.021868788 | 0.043689422 |
| GO_NEGATIVE_REGULATION_OF_INTERLEUKIN_6_PRODUCTION                  | 22  | 0.58985466 | 1.589986  | 0.007677543 | 0.043869976 |
| GO_PHAGOCYTTIC_CUP                                                  | 18  | 0.614565   | 1.5897448 | 0.016949153 | 0.043897834 |
| KEGG_JAK_STAT_SIGNALING_PATHWAY                                     | 83  | 0.44736877 | 1.589308  | 0.001960784 | 0.044021126 |
| GO_MYOSIN_BINDING                                                   | 44  | 0.5143315  | 1.5889033 | 0.0056926   | 0.04411619  |

|                                                                                             |     |            |           |             |             |
|---------------------------------------------------------------------------------------------|-----|------------|-----------|-------------|-------------|
| GO_KILLING_OF_CELLS_OF_OTHER_ORGANISM                                                       | 26  | 0.56176335 | 1.5886132 | 0.02008032  | 0.044184487 |
| GO_PLATELET_DEGRANULATION                                                                   | 97  | 0.43916255 | 1.5878943 | 0           | 0.044232555 |
| GO_ATP_DEPENDENT_CHROMATIN_REMODELING                                                       | 34  | 0.52445924 | 1.5880272 | 0.012219959 | 0.044233542 |
| GO_DNA_HELICASE_ACTIVITY                                                                    | 37  | 0.52870786 | 1.5883119 | 0.008097166 | 0.044257764 |
| GO_POSITIVE_REGULATION_OF_RECEPTOR_SIGNALING_PATHWAY_VIA_STAT                               | 55  | 0.4841426  | 1.588041  | 0.003921569 | 0.04428694  |
| GO_TERTIARY_GRANULE_LUMEN                                                                   | 43  | 0.5096086  | 1.5880815 | 0.017964073 | 0.044322416 |
| PID_P53_DOWNSTREAM_PATHWAY                                                                  | 92  | 0.44819924 | 1.5873886 | 0.001930502 | 0.044420008 |
| GO_SOLUTE_CATION_SYMPORTER_ACTIVITY                                                         | 64  | -0.4807924 | -1.61509  | 0           | 0.04442331  |
| GO_RESPONSE_TO_CAMP                                                                         | 69  | -0.4713409 | -1.615731 | 0.002141328 | 0.04444921  |
| GO_MONOCARBOXYLIC_ACID_TRANSMEMBRANE_TRANSPORTER_ACTIVITY                                   | 28  | -0.5721867 | -1.615274 | 0.014767933 | 0.044482753 |
| GO_LONG_TERM_MEMORY                                                                         | 20  | -0.6026228 | -1.614488 | 0.014553014 | 0.04456126  |
| GO_MONOVALENT_INORGANIC_CATION_TRANSPORT                                                    | 271 | -0.396786  | -1.613915 | 0           | 0.044660646 |
| GO_ORGANIC_ACID_SODIUM_SYMPORTER_ACTIVITY                                                   | 20  | -0.6128277 | -1.612577 | 0.023454158 | 0.045031905 |
| BIOCARTA_DEATH_PATHWAY                                                                      | 23  | 0.5821906  | 1.5847611 | 0.015473888 | 0.045421906 |
| GO_INORGANIC_ANION_TRANSPORT                                                                | 94  | -0.4541389 | -1.611048 | 0.002053388 | 0.045556843 |
| GO_ACTIN_FILAMENT_BUNDLE_ORGANIZATION                                                       | 95  | 0.44579247 | 1.5839455 | 0.001824818 | 0.04573932  |
| REACTOME_RUNX1_REGULATES_TRANSCRIPTION_OF_GENES_INVOLVED_IN_DIFFERENTIATION_OF_HSCS         | 39  | 0.513748   | 1.5835465 | 0.019267824 | 0.04585561  |
| GO_POSITIVE_REGULATION_OF_CELLULAR_COMPONENT_BIOGENESIS                                     | 288 | 0.38656375 | 1.5832547 | 0           | 0.045911465 |
| REACTOME_DEGRADATION_OF_GLI1_BY_THE_PROTEASOME                                              | 31  | 0.53411037 | 1.5828143 | 0.011881189 | 0.046014223 |
| GO_ANTIBIOTIC_CATABOLIC_PROCESS                                                             | 38  | -0.5258972 | -1.609479 | 0.008016032 | 0.046067785 |
| GO_POSITIVE_REGULATION_OF_MYELOID_LEUKOCYTE_CYTOKINE_PRODUCTION_INVOLVED_IN_IMMUNE_RESPONSE | 18  | 0.62016284 | 1.581007  | 0.029469548 | 0.046672847 |
| REACTOME_SIGNALING_BY_RETINOIC_ACID                                                         | 27  | -0.5608186 | -1.60696  | 0.004056795 | 0.046966612 |
| GO_OXIDOREDUCTASE_ACTIVITY_ACTING_ON_SINGLE_DONORS_WITH_INCORPORATION_OF_MOLECULAR_OXYGEN   | 18  | -0.6196461 | -1.606644 | 0.016260162 | 0.046970587 |
| GO_POSITIVE_REGULATION_OF_NOTCH_SIGNALING_PATHWAY                                           | 23  | 0.5775052  | 1.5797    | 0.025641026 | 0.047179762 |
| GO_REGULATION_OF_INTERLEUKIN_1_SECRETION                                                    | 28  | 0.5564492  | 1.5793158 | 0.013435701 | 0.04729674  |
| GO_ENDOPEPTIDASE_REGULATOR_ACTIVITY                                                         | 109 | 0.43524975 | 1.5779954 | 0           | 0.047795456 |
| GO_POSITIVE_REGULATION_OF_PEPTIDASE_ACTIVITY                                                | 113 | 0.42595038 | 1.5771855 | 0.001897533 | 0.048042227 |
| GO_STRUCTURAL_MOLECULE_ACTIVITY                                                             | 366 | 0.37739527 | 1.5765615 | 0           | 0.04819855  |
| GO_T_CELL_SELECTION                                                                         | 29  | 0.5495833  | 1.5766119 | 0.011976048 | 0.048238408 |
| GO_HYDROLASE_ACTIVITY_ACTING_ON_CARBON_NITROGEN_BUT_NOT_PEPTIDE_BONDS                       | 71  | -0.4594715 | -1.600794 | 0.001964637 | 0.048325177 |
| GO_KETONE_BIOSYNTHETIC_PROCESS                                                              | 30  | -0.5482359 | -1.600357 | 0.018556701 | 0.048403505 |
| GO_LONG_CHAIN_FATTY_ACID_METABOLIC_PROCESS                                                  | 68  | -0.4692149 | -1.600928 | 0.002087683 | 0.048410125 |
| GO_FATTY_ACID_BINDING                                                                       | 26  | -0.5606852 | -1.601238 | 0.014227643 | 0.048416894 |
| GO_VACUOLAR_LUMEN                                                                           | 123 | 0.4253197  | 1.5758046 | 0           | 0.048434354 |
| GO_LIPID_BIOSYNTHETIC_PROCESS                                                               | 422 | -0.3783905 | -1.601321 | 0           | 0.048527475 |
| REACTOME_GLUCOSE_METABOLISM                                                                 | 62  | -0.4812385 | -1.602443 | 0.004140787 | 0.04862924  |
| GO_4_IRON_4_SULFUR_CLUSTER_BINDING                                                          | 30  | -0.5577638 | -1.60134  | 0.02        | 0.048657354 |
| GO_MYELOID_LEUKOCYTE_CYTOKINE_PRODUCTION                                                    | 25  | 0.55538255 | 1.5751016 | 0.022774328 | 0.048661362 |
| GO_CALCIIUM_ION_IMPORT                                                                      | 49  | -0.5012454 | -1.601504 | 0.009881423 | 0.048727397 |
| GO_PROTON_TRANSMEMBRANE_TRANSPORTER_ACTIVITY                                                | 58  | -0.4856287 | -1.601793 | 0.007722008 | 0.048751846 |
| GO_CHROMOSOME_SEPARATION                                                                    | 35  | 0.5292608  | 1.5737274 | 0.005747126 | 0.049041998 |
| GO_REGULATION_OF_MRNA_METABOLIC_PROCESS                                                     | 160 | 0.41380635 | 1.57375   | 0           | 0.049096994 |
| GO_GLIAL_CELL_PROLIFERATION                                                                 | 31  | 0.5398731  | 1.5737576 | 0.013645224 | 0.04915532  |
| GO_CELL_CYCLE_CHECKPOINT                                                                    | 96  | 0.4402221  | 1.5730414 | 0           | 0.049186576 |
| GO_PYRUVATE_METABOLIC_PROCESS                                                               | 104 | -0.4366395 | -1.598208 | 0.004175365 | 0.04921322  |

|                                                               |     |            |           |             |             |
|---------------------------------------------------------------|-----|------------|-----------|-------------|-------------|
| GO_REGULATION_OF_BONE_REMODELING                              | 29  | 0.54796416 | 1.5730696 | 0.020754717 | 0.049240023 |
| REACTOME_CLASS_I_MHC_MEDIATED_ANTIGEN_PROCESSING_PRESENTATION | 192 | 0.40140653 | 1.5725089 | 0           | 0.049387697 |
| GO_REGULATION_OF_NIK_NF_KAPPAB_SIGNALING                      | 67  | 0.46347833 | 1.572158  | 0.005535055 | 0.049477883 |
| REACTOME_STABILIZATION_OF_P53                                 | 27  | 0.55498713 | 1.571851  | 0.007662835 | 0.049545493 |
| GO_APICAL_PLASMA_MEMBRANE                                     | 207 | -0.3968272 | -1.597122 | 0           | 0.049593575 |
| HALLMARK_MYC_TARGETS_V1                                       | 124 | 0.42452788 | 1.5712198 | 0           | 0.04976393  |
| GO_EXTRACELLULAR_MATRIX_DISASSEMBLY                           | 49  | 0.4896171  | 1.5701091 | 0.007920792 | 0.049984846 |

**Table S2. CKD-Olive enriched geneset**

| <b>NAME</b>                                                                    | <b>SIZE</b> | <b>ES</b>   | <b>NES</b> | <b>NOM p-val</b> | <b>FDR q-val</b> |
|--------------------------------------------------------------------------------|-------------|-------------|------------|------------------|------------------|
| GO_MITOCHONDRIAL_GENE_EXPRESSION                                               | 85          | 0.65229046  | 2.267848   | 0                | 0                |
| HALLMARK_TNFA_SIGNALING_VIA_NFKB                                               | 175         | -0.71899724 | -3.1513178 | 0                | 0                |
| REACTOME_NGF_STIMULATED_TRANSCRIPTION                                          | 27          | -0.8094353  | -2.52837   | 0                | 0                |
| REACTOME_CLASS_A_1_RHODOPSIN_LIKE_RECEPTORS                                    | 168         | -0.5631937  | -2.502836  | 0                | 0                |
| REACTOME_NUCLEAR_EVENTS_KINASE_AND_TRANSCRIPTIO<br>N_FACTOR_ACTIVATION         | 35          | -0.75876415 | -2.4958098 | 0                | 0                |
| HALLMARK_KRAS_SIGNALING_DN                                                     | 136         | -0.58310866 | -2.4956658 | 0                | 0                |
| REACTOME_GPCR_LIGAND_BINDING                                                   | 225         | -0.55271363 | -2.492893  | 0                | 0                |
| GO_GLOMERULUS_DEVELOPMENT                                                      | 47          | -0.6737668  | -2.3901112 | 0                | 0                |
| GO_G_PROTEIN_COUPLED_RECEPTOR_ACTIVITY                                         | 202         | -0.5309663  | -2.3873925 | 0                | 0                |
| GO_TRNA_METABOLIC_PROCESS                                                      | 73          | 0.6391042   | 2.2022629  | 0                | 2.29E-04         |
| GO_MITOCHONDRIAL_MATRIX                                                        | 283         | 0.5427342   | 2.1672316  | 0                | 2.70E-04         |
| GO_NCRNA_METABOLIC_PROCESS                                                     | 191         | 0.5626319   | 2.1718395  | 0                | 3.38E-04         |
| GO_PEROXISOME_ORGANIZATION                                                     | 57          | 0.65827864  | 2.1625917  | 0                | 3.38E-04         |
| GO_MITOCHONDRIAL_TRANSLATION                                                   | 71          | 0.65156645  | 2.2221332  | 0                | 3.43E-04         |
| REACTOME_MITOTIC_SPINDLE_CHECKPOINT                                            | 49          | 0.67890716  | 2.1527152  | 0                | 3.88E-04         |
| REACTOME_PEROXISOMAL_PROTEIN_IMPORT                                            | 45          | 0.67779905  | 2.1389458  | 0                | 4.24E-04         |
| HALLMARK_PROTEIN_SECRETION                                                     | 72          | 0.6175955   | 2.1079254  | 0                | 5.52E-04         |
| GO_PEROXISOMAL_TRANSPORT                                                       | 50          | 0.6482501   | 2.1065464  | 0                | 5.63E-04         |
| GO_NEGATIVE_REGULATION_OF_MAP_KINASE_ACTIVITY                                  | 49          | -0.6412498  | -2.3081656 | 0                | 5.73E-04         |
| GO_NCRNA_PROCESSING                                                            | 159         | 0.56081283  | 2.1202424  | 0                | 6.01E-04         |
| REACTOME_DNA_REPAIR                                                            | 147         | 0.56028867  | 2.1131804  | 0                | 6.07E-04         |
| NABA_SECRETED_FACTORS                                                          | 166         | -0.5275348  | -2.2887585 | 0                | 6.13E-04         |
| GO_P38MAPK_CASCADE                                                             | 27          | -0.7268468  | -2.2751486 | 0                | 6.46E-04         |
| REACTOME_PEPTIDE_LIGAND_BINDING_RECEPTORS                                      | 113         | -0.5453449  | -2.2899451 | 0                | 6.60E-04         |
| GO_INACTIVATION_OF_MAPK_ACTIVITY                                               | 18          | -0.81544054 | -2.2856953 | 0                | 6.89E-04         |
| GO_NEUROPEPTIDE_SIGNALING_PATHWAY                                              | 39          | -0.6750704  | -2.2696898 | 0                | 7.11E-04         |
| GO_REGULATION_OF_EPITHELIAL_CELL_DIFFERENTIATION                               | 94          | -0.55625445 | -2.290903  | 0                | 7.15E-04         |
| GO_KINETOCHORE                                                                 | 63          | 0.61986965  | 2.0851672  | 0                | 7.65E-04         |
| GO_CELLULAR_AMINO_ACID_METABOLIC_PROCESS                                       | 203         | 0.53815955  | 2.0869596  | 0                | 7.72E-04         |
| GO_PROTEIN_LOCALIZATION_TO_CHROMOSOME                                          | 32          | 0.6989692   | 2.0881674  | 0                | 7.80E-04         |
| KEGG_NEUROACTIVE_LIGAND_RECEPTOR_INTERACTION                                   | 138         | -0.5471579  | -2.295804  | 0                | 7.80E-04         |
| REACTOME_HIV_INFECTION                                                         | 133         | 0.56130385  | 2.0773504  | 0                | 8.02E-04         |
| PID_ATF2_PATHWAY                                                               | 35          | -0.6962275  | -2.3008952 | 0                | 8.58E-04         |
| GO_SKELETAL_MUSCLE_CELL_DIFFERENTIATION                                        | 27          | -0.72919786 | -2.258769  | 0                | 8.59E-04         |
| PID_FRA_PATHWAY                                                                | 27          | -0.7179398  | -2.2364116 | 0                | 9.99E-04         |
| GO_ANTIMICROBIAL_HUMORAL_IMMUNE_RESPONSE_MEDI<br>ATED_BY_ANTIMICROBIAL_PEPTIDE | 36          | -0.6748693  | -2.2327883 | 0                | 0.00103673       |
| REACTOME_MITOTIC_METAPHASE_AND_ANAPHASE                                        | 122         | 0.5547193   | 2.0601268  | 0                | 0.001152018      |
| GO_MITOCHONDRIAL_PROTEIN_COMPLEX                                               | 120         | 0.5688479   | 2.0548766  | 0                | 0.001163366      |
| GO_CALCIIUM_CHANNEL_REGULATOR_ACTIVITY                                         | 24          | -0.73085445 | -2.218277  | 0                | 0.001253356      |
| REACTOME_FORMATION_OF_THE_CORNIFIED_ENVELOPE                                   | 49          | -0.6028737  | -2.2232037 | 0                | 0.001313039      |
| GO KERATINIZATION                                                              | 54          | -0.6019733  | -2.2067044 | 0                | 0.001320545      |
| GO_MONONUCLEAR_CELL_MIGRATION                                                  | 54          | -0.5998211  | -2.2162757 | 0                | 0.001343985      |
| REACTOME_TRANSLATION                                                           | 134         | 0.54412204  | 2.0365582  | 0                | 0.001353025      |
| REACTOME_ANTIGEN_PROCESSING_UBIQUITINATION_PROT<br>EASOME_DEGRADATION          | 140         | 0.54684204  | 2.0445826  | 0                | 0.001353196      |
| GO_RIBONUCLEOPROTEIN_COMPLEX_BIOGENESIS                                        | 198         | 0.5258416   | 2.0418377  | 0                | 0.001353417      |

|                                                            |     |             |            |   |             |
|------------------------------------------------------------|-----|-------------|------------|---|-------------|
| KEGG_LEISHMANIA_INFECTION                                  | 42  | -0.6317497  | -2.2087188 | 0 | 0.001373367 |
| REACTOME_TRANSCRIPTIONAL_REGULATION_BY_SMALL_RNAS          | 30  | 0.70608044  | 2.0343776  | 0 | 0.00138173  |
| GO_RNA_PROCESSING                                          | 426 | 0.4941372   | 2.037449   | 0 | 0.001383536 |
| GO_LIGASE_ACTIVITY                                         | 70  | 0.60498637  | 2.0450664  | 0 | 0.001424417 |
| NABA_CORE_MATRISOME                                        | 145 | -0.518924   | -2.2105315 | 0 | 0.00143059  |
| HALLMARK_HYPOXIA                                           | 153 | -0.5001534  | -2.194429  | 0 | 0.001462697 |
| GO_TRANSCRIPTION_COUPLED_NUCLEOTIDE_EXCISION_REPAIR        | 40  | 0.65247834  | 1.9945294  | 0 | 0.001469452 |
| REACTOME_TRNA_PROCESSING                                   | 56  | 0.6147914   | 1.9954349  | 0 | 0.001472361 |
| GO_MICROBODY                                               | 84  | 0.57162404  | 1.9900677  | 0 | 0.001479546 |
| GO_NCRNA_EXPORT_FROM_NUCLEUS                               | 25  | 0.7144898   | 2.0034745  | 0 | 0.001509109 |
| GO_RNA_POLYMERASE_II_HOLOENZYME                            | 47  | 0.6297023   | 1.9956646  | 0 | 0.001510114 |
| REACTOME_GENE_SILENCING_BY_RNA                             | 41  | 0.645742    | 2.0120876  | 0 | 0.001512377 |
| REACTOME_VIRAL_MESSENGER_RNA_SYNTHESIS                     | 27  | 0.71238726  | 1.9909594  | 0 | 0.001514773 |
| KEGG_VALINE_LEUCINE_AND_ISOLEUCINE_DEGRADATION             | 38  | 0.6455556   | 1.9884077  | 0 | 0.001522666 |
| GO_NUCLEOID                                                | 25  | 0.72565264  | 2.019589   | 0 | 0.001529308 |
| GO_GENE_SILENCING                                          | 110 | 0.55500287  | 1.9972806  | 0 | 0.001532498 |
| REACTOME_CELL_CYCLE_CHECKPOINTS                            | 126 | 0.5393703   | 2.0133343  | 0 | 0.001540932 |
| REACTOME_MITOCHONDRIAL_TRANSLATION                         | 47  | 0.6264513   | 2.0004754  | 0 | 0.001542477 |
| GO_TRANSLATIONAL_TERMINATION                               | 55  | 0.6024557   | 2.0036683  | 0 | 0.001553495 |
| REACTOME_POSTMITOTIC_NUCLEAR_PORE_COMPLEX_NPC_REFORMATION  | 17  | 0.7930977   | 2.020829   | 0 | 0.001561957 |
| REACTOME_HOST_INTERACTIONS_OF_HIV_FACTORS                  | 78  | 0.58720654  | 2.0250251  | 0 | 0.001570087 |
| GO_MITOCHONDRIAL_RNA_METABOLIC_PROCESS                     | 26  | 0.7033798   | 1.997946   | 0 | 0.001573917 |
| GO_RIBONUCLEOPROTEIN_COMPLEX                               | 326 | 0.4931239   | 1.98569    | 0 | 0.001578707 |
| GO_INTERSTRAND_CROSS_LINK_REPAIR                           | 19  | 0.77160656  | 1.982238   | 0 | 0.001578916 |
| REACTOME_METABOLISM_OF_RNA                                 | 323 | 0.4955354   | 2.005309   | 0 | 0.001587094 |
| GO_HORMONE_ACTIVITY                                        | 59  | -0.5874385  | -2.1847432 | 0 | 0.001593894 |
| GO_RIBOSOME_BIOGENESIS                                     | 136 | 0.538512    | 2.0148637  | 0 | 0.001595966 |
| REACTOME_TRNA_PROCESSING_IN_THE_NUCLEUS                    | 33  | 0.67277104  | 2.004072   | 0 | 0.001600571 |
| PID_IL6_7_PATHWAY                                          | 35  | -0.6649413  | -2.1750374 | 0 | 0.001600724 |
| KEGG_PEROXISOME                                            | 60  | 0.60370445  | 1.9826615  | 0 | 0.001603552 |
| GO_EPIDERMIS_DEVELOPMENT                                   | 184 | -0.48912862 | -2.1694512 | 0 | 0.001603976 |
| REACTOME_FORMATION_OF_TC_NER_PRE_INCISION_COMPLEX          | 25  | 0.6968985   | 1.9823202  | 0 | 0.00161251  |
| GO_CATALYTIC_ACTIVITY_ACTING_ON_RNA                        | 157 | 0.5326801   | 2.006467   | 0 | 0.00163829  |
| REACTOME KERATINIZATION                                    | 50  | -0.60733    | -2.176042  | 0 | 0.001655921 |
| GO_MITOCHONDRIAL_TRANSLATIONAL_TERMINATION                 | 45  | 0.6329663   | 1.9791116  | 0 | 0.001671856 |
| REACTOME_FANCONI_ANEMIA_PATHWAY                            | 15  | 0.79838437  | 1.9785333  | 0 | 0.001679177 |
| GO_CHROMOSOMAL_REGION                                      | 151 | 0.5219997   | 1.9752727  | 0 | 0.001765868 |
| REACTOME_SEPARATION_OF_SISTER_CHROMATIDS                   | 93  | 0.55402917  | 1.9738085  | 0 | 0.001784061 |
| REACTOME_PROTEIN_UBIQUITINATION                            | 39  | 0.63619405  | 1.9672147  | 0 | 0.001900767 |
| REACTOME_SWITCHING_OF_ORIGINS_TO_A_POST_REPLICATIVE_STATE  | 45  | 0.61961466  | 1.9674287  | 0 | 0.00193471  |
| REACTOME_E3_UBIQUITIN_LIGASES_UBIQUITINATE_TARGET_PROTEINS | 26  | 0.6946658   | 1.9681125  | 0 | 0.001957463 |
| REACTOME_ANTIVIRAL_MECHANISM_BY_IFN_STIMULATED_GENES       | 54  | 0.59909695  | 1.9631771  | 0 | 0.001961309 |
| GO_TRNA_PROCESSING                                         | 53  | 0.60660374  | 1.9681923  | 0 | 0.001981129 |
| GO_HOST_CELLULAR_COMPONENT                                 | 42  | 0.63496965  | 1.9612634  | 0 | 0.001985464 |

|                                                                        |     |             |            |             |             |
|------------------------------------------------------------------------|-----|-------------|------------|-------------|-------------|
| GO_NUCLEOTIDE_EXCISION_REPAIR_PREINCISION_COMPLE<br>X_ASSEMBLY         | 19  | 0.7393532   | 1.9608723  | 0           | 0.001986007 |
| GO_MRNA_PROCESSING                                                     | 242 | 0.5020404   | 1.9684877  | 0           | 0.002018509 |
| REACTOME_PROTEIN_LOCALIZATION                                          | 97  | 0.5479566   | 1.9544846  | 0           | 0.002117348 |
| GO_MICROBODY_LUMEN                                                     | 34  | 0.6603143   | 1.9553509  | 0           | 0.002140522 |
| REACTOME_NUCLEOTIDE_EXCISION_REPAIR                                    | 59  | 0.5917051   | 1.9559382  | 0           | 0.002142406 |
| GO_UBIQUITIN_LIGASE_COMPLEX                                            | 106 | 0.5397005   | 1.9513243  | 0           | 0.00221148  |
| REACTOME_SNRNP_ASSEMBLY                                                | 28  | 0.6746407   | 1.9444945  | 0           | 0.002321016 |
| KEGG_RNA_DEGRADATION                                                   | 24  | 0.71847457  | 1.9457409  | 0           | 0.002339793 |
| GO_DNA_REPAIR                                                          | 227 | 0.4969211   | 1.9447259  | 0           | 0.002355658 |
| REACTOME_INTERACTIONS_OF_REV_WITH_HOST_CELLULAR<br>_PROTEINS           | 23  | 0.70665085  | 1.9463167  | 0.001574803 | 0.002365233 |
| GO_RNA_SPLICING_VIA_TRANSESTERIFICATION_REACTIONS                      | 168 | 0.50371987  | 1.9428974  | 0           | 0.002385419 |
| REACTOME_TRANSPORT_OF_THE_SLBP_DEPENDANT_MATU<br>RE_MRNA               | 23  | 0.7010189   | 1.9414167  | 0           | 0.002429132 |
| GO_CORNIFICATION                                                       | 50  | -0.6008756  | -2.1379766 | 0           | 0.002491423 |
| GO_NEUROTRANSMITTER_RECEPTOR_ACTIVITY                                  | 44  | -0.6247998  | -2.1426077 | 0           | 0.002515487 |
| PID_AP1_PATHWAY                                                        | 48  | -0.59911454 | -2.1406705 | 0           | 0.002541119 |
| GO_NEGATIVE_REGULATION_OF_PROTEIN_SERINE_THREON<br>INE_KINASE_ACTIVITY | 82  | -0.53761894 | -2.1385374 | 0           | 0.002564701 |
| REACTOME_NUCLEAR_IMPORT_OF_REV_PROTEIN                                 | 22  | 0.69992787  | 1.9379562  | 0.001557632 | 0.002623475 |
| GO_RRNA_METABOLIC_PROCESS                                              | 100 | 0.54298073  | 1.9368082  | 0           | 0.002653063 |
| GO_LIPID_TRANSFER_ACTIVITY                                             | 24  | 0.69630635  | 1.9362935  | 0           | 0.00267276  |
| GO_EXTRACELLULAR_MATRIX_STRUCTURAL_CONSTITUENT                         | 103 | -0.50942755 | -2.124916  | 0           | 0.002802216 |
| GO_ALPHA_BETA_T_CELL_DIFFERENTIATION                                   | 65  | -0.5577301  | -2.1212935 | 0           | 0.002878034 |
| REACTOME_DNA_REPLICATION                                               | 70  | 0.5690401   | 1.9317497  | 0           | 0.002908418 |
| GO_DNA_TEMPLATED_TRANSCRIPTION_TERMINATION                             | 35  | 0.6395991   | 1.9324008  | 0           | 0.002929387 |
| GO_ANTIBACTERIAL_HUMORAL_RESPONSE                                      | 21  | -0.7136905  | -2.1214395 | 0           | 0.002955819 |
| KEGG_NUCLEOTIDE_EXCISION_REPAIR                                        | 33  | 0.6450871   | 1.9274141  | 0           | 0.00300889  |
| GO_MULTI_ORGANISM_LOCALIZATION                                         | 36  | 0.6340833   | 1.92785    | 0           | 0.0030395   |
| GO_RECEPTOR_REGULATOR_ACTIVITY                                         | 244 | -0.46133462 | -2.1085029 | 0           | 0.003048891 |
| HALLMARK_OXIDATIVE_PHOSPHORYLATION                                     | 143 | 0.5143699   | 1.9255736  | 0           | 0.003053175 |
| REACTOME_HIV_LIFE_CYCLE                                                | 80  | 0.56144565  | 1.9260042  | 0           | 0.003074793 |
| REACTOME_HIV_TRANSCRIPTION_INITIATION                                  | 31  | 0.6553008   | 1.9247303  | 0           | 0.003082579 |
| GO_CYTOKINE_ACTIVITY                                                   | 109 | -0.5078009  | -2.10911   | 0           | 0.003125113 |
| REACTOME_APC_C_MEDIATED_DEGRADATION_OF_CELL_CY<br>CLE_PROTEINS         | 44  | 0.6116639   | 1.921756   | 0           | 0.003139642 |
| GO_PROTEIN_DNA_COMPLEX_SUBUNIT_ORGANIZATION                            | 114 | 0.52617705  | 1.9224122  | 0           | 0.003144792 |
| GO_OLFACTORY_RECEPTOR_ACTIVITY                                         | 17  | -0.76283556 | -2.1117249 | 0           | 0.003159044 |
| REACTOME_CLASS_I_MHC_MEDIATED_ANTIGEN_PROCESSI<br>NG_PRESENTATION      | 192 | 0.5007449   | 1.9204808  | 0           | 0.003199749 |
| REACTOME_EXPORT_OF_VIRAL_RIBONUCLEOPROTEINS_FRO<br>M_NUCLEUS           | 22  | 0.70852494  | 1.9184166  | 0           | 0.003218191 |
| REACTOME_INTERACTIONS_OF_VPR_WITH_HOST_CELLULAR<br>_PROTEINS           | 24  | 0.6919042   | 1.9179026  | 0           | 0.003220388 |
| GO_NUCLEAR_CHROMOSOME_TELOMERIC_REGION                                 | 53  | 0.59131885  | 1.9148966  | 0           | 0.003332835 |
| GO_G_PROTEIN_COUPLED_RECEPTOR_SIGNALING_PATHWA<br>Y                    | 481 | -0.42407453 | -2.0981855 | 0           | 0.003338453 |
| GO_TRANSLATION_REGULATOR_ACTIVITY_NUCLEIC_ACID_BI<br>NDING             | 45  | 0.61152196  | 1.9152724  | 0           | 0.003363729 |

|                                                                        |     |             |            |             |             |
|------------------------------------------------------------------------|-----|-------------|------------|-------------|-------------|
| GO_OXIDOREDUCTASE_ACTIVITY_ACTING_ON_THE_CH_CH_GROUP_OF_DONORS         | 40  | 0.6199597   | 1.9135305  | 0           | 0.003418692 |
| REACTOME_MRNA_CAPPING                                                  | 17  | 0.7488566   | 1.9115434  | 0.001633987 | 0.003448203 |
| GO_TRNA_MODIFICATION                                                   | 34  | 0.63289106  | 1.9120675  | 0.001547988 | 0.003471688 |
| GO_RNA_CAPPING                                                         | 17  | 0.7488566   | 1.9086165  | 0           | 0.003559204 |
| GO_NEGATIVE_REGULATION_OF_CELL_CYCLE_G2_M_PHASE_TRANSITION             | 48  | 0.5923575   | 1.9044408  | 0           | 0.003599946 |
| REACTOME_TRANSCRIPTION_COUPLED_NUCLEOTIDE_EXCISION_REPAIR_TC_NER       | 43  | 0.6171787   | 1.9037976  | 0           | 0.003611592 |
| GO_TRANSLATION_INITIATION_FACTOR_ACTIVITY                              | 28  | 0.6705602   | 1.9051875  | 0           | 0.003616337 |
| GO_PROTEIN_POLYUBIQUITINATION                                          | 146 | 0.5113581   | 1.9064765  | 0           | 0.003621277 |
| GO_ORGANELLAR_RIBOSOME                                                 | 45  | 0.6067157   | 1.9055039  | 0           | 0.003640305 |
| GO_FEMALE_PREGNANCY                                                    | 121 | -0.49991155 | -2.0910814 | 0           | 0.003654935 |
| REACTOME_FORMATION_OF_INCISION_COMPLEX_IN_GG_NER                       | 27  | 0.6773167   | 1.9067044  | 0           | 0.003660638 |
| GO_COENZYME_METABOLIC_PROCESS                                          | 160 | 0.50130635  | 1.9021559  | 0           | 0.003675475 |
| REACTOME_M_PHASE                                                       | 181 | 0.49613526  | 1.902552   | 0           | 0.003692297 |
| GO_SENSORY_PERCEPTION_OF_CHEMICAL_STIMULUS                             | 56  | -0.5763994  | -2.0937872 | 0           | 0.003700363 |
| GO_RESPONSE_TO_CHEMOKINE                                               | 70  | -0.5464491  | -2.0832741 | 0           | 0.00371117  |
| GO_POSTSYNAPTIC_NEUROTRANSMITTER_RECEPTOR_ACTIVITY                     | 32  | -0.62846524 | -2.0885143 | 0           | 0.003726528 |
| KEGG_MAPK_SIGNALING_PATHWAY                                            | 166 | -0.47252116 | -2.0838385 | 0           | 0.003791847 |
| REACTOME_SIGNALING_BY_GPCR                                             | 426 | -0.43265623 | -2.0788693 | 0           | 0.003955875 |
| HALLMARK_MYC_TARGETS_V1                                                | 124 | 0.5117034   | 1.897323   | 0           | 0.003957928 |
| GO_PHOSPHOTRANSFERASE_ACTIVITY_PHOSPHATE_GROUP_AS_ACCEPTOR             | 24  | 0.68445957  | 1.8956003  | 0.001594896 | 0.003979804 |
| NABA_MATRISOME_ASSOCIATED                                              | 379 | -0.43142262 | -2.0771508 | 0           | 0.003981365 |
| GO_COFACTOR_BIOSYNTHETIC_PROCESS                                       | 141 | 0.507877    | 1.8961748  | 0           | 0.003992469 |
| GO_POSITIVE_REGULATION_OF_OSTEOBLAST_DIFFERENTIATION                   | 37  | -0.6203968  | -2.0730062 | 0           | 0.004039671 |
| GO_GENE_SILENCING_BY_RNA                                               | 79  | 0.54217494  | 1.893584   | 0           | 0.00410545  |
| GO_ANAPHASE_PROMOTING_COMPLEX_DEPENDENT_CATABOLIC_PROCESS              | 42  | 0.60952127  | 1.8924488  | 0           | 0.004157477 |
| GO_MONOCYTE_CHEMOTAXIS                                                 | 38  | -0.61249584 | -2.0661464 | 0           | 0.004185712 |
| REACTOME_SIGNALING_BY_NTRKS                                            | 84  | -0.5279017  | -2.0712368 | 0           | 0.004196858 |
| GO_TRANSMITTER_GATED_CHANNEL_ACTIVITY                                  | 25  | -0.669004   | -2.060613  | 0           | 0.004225343 |
| GO_POSITIVE_REGULATION_OF_OSSIFICATION                                 | 52  | -0.5778159  | -2.0681672 | 0           | 0.0042332   |
| REACTOME_RAF_INDEPENDENT_MAPK1_3_ACTIVATION                            | 17  | -0.76847494 | -2.0634198 | 0           | 0.004234088 |
| GO_SKELETAL_MUSCLE_ORGAN_DEVELOPMENT                                   | 75  | -0.53048426 | -2.0612414 | 0           | 0.004240084 |
| GO_AZUROPHIL_GRANULE                                                   | 105 | 0.5258156   | 1.8911104  | 0           | 0.004253427 |
| REACTOME_TRANSPORT_OF_MATURE_MRNAS_DERIVED_FROM_INTRONLESS_TRANSCRIPTS | 24  | 0.67862475  | 1.8904963  | 0           | 0.004270942 |
| GO_CD4_POSITIVE_ALPHA_BETA_T_CELL_ACTIVATION                           | 57  | -0.5594862  | -2.0686545 | 0           | 0.004314608 |
| GO_TELOMERE_MAINTENANCE_VIA_TELOMERE_LENGTHENING                       | 38  | 0.6248933   | 1.8883904  | 0           | 0.004314873 |
| GO_REGULATION_OF_FAT_CELL_DIFFERENTIATION                              | 69  | -0.5425325  | -2.0621521 | 0           | 0.0043158   |
| REACTOME_DUAL_INCISION_IN_TC_NER                                       | 38  | 0.62826145  | 1.8886265  | 0           | 0.004317239 |
| GO_NEGATIVE_REGULATION_OF_TELOMERE_MAINTENANCE                         | 16  | 0.7417157   | 1.8873924  | 0           | 0.00433259  |
| REACTOME_NS1_MEDIATED_EFFECTS_ON_HOST_PATHWAYS                         | 25  | 0.6916261   | 1.8888971  | 0           | 0.004338358 |
| GO_CHROMOSOME_CENTROMERIC_REGION                                       | 86  | 0.54085267  | 1.8875464  | 0           | 0.004365575 |



|                                                                                                                   |     |             |            |             |             |
|-------------------------------------------------------------------------------------------------------------------|-----|-------------|------------|-------------|-------------|
| GO_ENDOPEPTIDASE_COMPLEX                                                                                          | 33  | 0.6376735   | 1.8877996  | 0           | 0.004380433 |
| GO_GLOBAL_GENOME_NUCLEOTIDE_EXCISION_REPAIR                                                                       | 17  | 0.7252804   | 1.8860856  | 0           | 0.004383958 |
| REACTOME_APC_C_CDH1_MEDIATED_DEGRADATION_OF_CDC20_AND_OTHER_APC_C_CDH1_TARGETED_PROTEINS_IN_LATE_MITOSIS_EARLY_G1 | 37  | 0.6171228   | 1.8843778  | 0           | 0.004536316 |
| GO_NUCLEOTIDE_EXCISION_REPAIR                                                                                     | 60  | 0.5737302   | 1.8813828  | 0           | 0.004644789 |
| GO_PROTEIN_CONTAINING_COMPLEX_LOCALIZATION                                                                        | 155 | 0.49525163  | 1.8814744  | 0           | 0.004673321 |
| REACTOME_TRANSCRIPTION_OF_THE_HIV_GENOME                                                                          | 40  | 0.61725825  | 1.8773019  | 0.001470588 | 0.004894362 |
| GO_NUCLEOTIDE_EXCISION_REPAIR_DNA_INCISION                                                                        | 27  | 0.6678177   | 1.8762584  | 0           | 0.004933022 |
| REACTOME_GLYOXYLATE_METABOLISM_AND_GLYCINE_DEGRADATION                                                            | 26  | 0.66727716  | 1.8750308  | 0           | 0.00497714  |
| NABA_ECM_GLYCOPROTEINS                                                                                            | 103 | -0.49340373 | -2.036812  | 0           | 0.005085269 |
| GO_REGULATION_OF_EPIDERMIS_DEVELOPMENT                                                                            | 50  | -0.56030226 | -2.0372992 | 0           | 0.005137422 |
| GO_REGULATION_OF_LEUKOCYTE_PROLIFERATION                                                                          | 138 | -0.48305985 | -2.0400298 | 0           | 0.005137584 |
| GO_ALPHA_BETA_T_CELL_ACTIVATION                                                                                   | 89  | -0.5042754  | -2.038164  | 0           | 0.005165631 |
| REACTOME_MUSCLE_CONTRACTION                                                                                       | 117 | -0.4949417  | -2.042169  | 0           | 0.005165807 |
| GO_VOLTAGE_GATED_CALCIUM_CHANNEL_COMPLEX                                                                          | 21  | -0.6961228  | -2.0428774 | 0           | 0.005166105 |
| REACTOME_SUMOYLATION_OF_UBIQUITINYLATION_PROTEINS                                                                 | 22  | 0.67428833  | 1.8715179  | 0           | 0.005169444 |
| GO_TRANSLATIONAL_ELONGATION                                                                                       | 62  | 0.562065    | 1.8715552  | 0           | 0.005206815 |
| GO_ACTIVATION_OF_MAPK_ACTIVITY                                                                                    | 83  | -0.5186619  | -2.0454652 | 0           | 0.005225088 |
| GO_MICROBODY_MEMBRANE                                                                                             | 39  | 0.61357415  | 1.8694882  | 0.001490313 | 0.00523409  |
| REACTOME_INFLUENZA_INFECTION                                                                                      | 72  | 0.545982    | 1.8696296  | 0           | 0.005276993 |
| GO_UBIQUITIN_LIKE_PROTEIN_TRANSFERASE_ACTIVITY                                                                    | 174 | 0.49165118  | 1.8678001  | 0           | 0.00532287  |
| GO_MUSCLE_ORGAN_DEVELOPMENT                                                                                       | 201 | -0.4498735  | -2.0310032 | 0           | 0.005416917 |
| GO_CHONDROCYTE_DEVELOPMENT                                                                                        | 21  | -0.6907847  | -2.0294557 | 0           | 0.00548577  |
| KEGG_HYPERTROPHIC_CARDIOMYOPATHY_HCM                                                                              | 56  | -0.5497783  | -2.0312521 | 0           | 0.005498992 |
| REACTOME_G_ALPHA_S_SIGNALLING_EVENTS                                                                              | 90  | -0.5108022  | -2.0279448 | 0           | 0.005553208 |
| REACTOME_MITOCHONDRIAL_FATTY_ACID_BETA_OXIDATION                                                                  | 24  | 0.672503    | 1.8632102  | 0           | 0.005795198 |
| GO_CORECEPTOR_ACTIVITY                                                                                            | 26  | -0.6530976  | -2.017563  | 0           | 0.00582776  |
| GO_DNA_BINDING_TRANSCRIPTION_ACTIVATOR_ACTIVITY                                                                   | 230 | -0.44974196 | -2.0185206 | 0           | 0.005837346 |
| GO_CD4_POSITIVE_ALPHA_BETA_T_CELL_DIFFERENTIATION                                                                 | 47  | -0.5628817  | -2.023334  | 0           | 0.005864386 |
| GO_PEPTIDASE_COMPLEX                                                                                              | 44  | 0.5793685   | 1.8587615  | 0           | 0.005866022 |
| GO_CELL_PROLIFERATION_INVOLVED_IN_KIDNEY_DEVELOPMENT                                                              | 16  | -0.75836074 | -2.0187354 | 0           | 0.005869411 |
| GO_PHOSPHOLIPID_TRANSPORTER_ACTIVITY                                                                              | 25  | 0.6637966   | 1.8620046  | 0.003246753 | 0.005872945 |
| GO_CELLULAR_AMINO_ACID_CATABOLIC_PROCESS                                                                          | 89  | 0.5316016   | 1.861098   | 0           | 0.005874903 |
| GO_TRANSLATION_FACTOR_ACTIVITY_RNA_BINDING                                                                        | 40  | 0.6089048   | 1.8599415  | 0           | 0.005878302 |
| GO_RNA_DEPENDENT_DNA_BIOSYNTHETIC_PROCESS                                                                         | 33  | 0.6326763   | 1.8591287  | 0.001470588 | 0.005895592 |
| GO_CELL_FATE_DETERMINATION                                                                                        | 23  | -0.6826698  | -2.0207639 | 0           | 0.005901465 |
| GO_REGULATION_OF_TELOMERE_MAINTENANCE_VIA_TELOMERE_LENGTHENING                                                    | 27  | 0.6433276   | 1.8600187  | 0           | 0.005913686 |
| GO_EPIDERMAL_CELL_DIFFERENTIATION                                                                                 | 132 | -0.4769538  | -2.0194347 | 0           | 0.005937115 |
| GO_NEUROTRANSMITTER_RECEPTOR_ACTIVITY_INVOLVED_IN_REGULATION_OF_POSTSYNAPTIC_MEMBRANE_POTENTIAL                   | 26  | -0.6578429  | -2.0188794 | 0           | 0.005949814 |
| GO_MYOFIBRIL_ASSEMBLY                                                                                             | 33  | -0.5998155  | -2.0148294 | 0           | 0.005996564 |
| GO_POSITIVE_REGULATION_OF_BLOOD_CIRCULATION                                                                       | 46  | -0.56322306 | -2.013604  | 0           | 0.006116236 |
| GO_GLOMERULAR_EPITHELIAL_CELL_DIFFERENTIATION                                                                     | 19  | -0.6955448  | -2.0109186 | 0           | 0.006211437 |

|                                                                                                   |     |             |            |             |             |
|---------------------------------------------------------------------------------------------------|-----|-------------|------------|-------------|-------------|
| PID_DELTA_NP63_PATHWAY                                                                            | 28  | -0.628234   | -2.0086772 | 0           | 0.006368953 |
| GO_RNA_MODIFICATION                                                                               | 64  | 0.5548116   | 1.8536756  | 0           | 0.006371109 |
| REACTOME_REGULATION_OF_PTEN_STABILITY_AND_ACTIVI<br>TY                                            | 39  | 0.61316466  | 1.8527236  | 0           | 0.006394534 |
| GO_MULTI_MULTICELLULAR_ORGANISM_PROCESS                                                           | 144 | -0.47801033 | -2.0072536 | 0           | 0.006394567 |
| KEGG_MISMATCH_REPAIR                                                                              | 18  | 0.7085162   | 1.8516693  | 0.001692047 | 0.006458129 |
| GO_NEGATIVE_REGULATION_OF_MAPK_CASCADE                                                            | 104 | -0.49172017 | -2.0039573 | 0           | 0.006712338 |
| GO_ANTIMICROBIAL_HUMORAL_RESPONSE                                                                 | 59  | -0.53919256 | -2.0022924 | 0           | 0.006774284 |
| GO_NEGATIVE_REGULATION_OF_ERK1_AND_ERK2_CASCAD<br>E                                               | 43  | -0.5805972  | -1.9905481 | 0           | 0.00688505  |
| GO_ENDOCRINE_PANCREAS_DEVELOPMENT                                                                 | 24  | -0.6478059  | -1.98973   | 0           | 0.006918946 |
| GO_REGULATION_OF_OSSIFICATION                                                                     | 101 | -0.48970968 | -1.9912589 | 0           | 0.006923081 |
| GO_REGULATION_OF_BLOOD_CIRCULATION                                                                | 173 | -0.44290102 | -1.9924393 | 0           | 0.006925036 |
| GO_MUSCLE_TISSUE_DEVELOPMENT                                                                      | 202 | -0.44566387 | -1.9977231 | 0           | 0.006951585 |
| BIOCARTA_KERATINOCYTE_PATHWAY                                                                     | 35  | -0.5804216  | -1.9928827 | 0           | 0.006963257 |
| GO_CELL_CHEMOTAXIS                                                                                | 184 | -0.44519535 | -1.9940941 | 0           | 0.006964863 |
| GO_REGULATION_OF_CARDIOCYTE_DIFFERENTIATION                                                       | 24  | -0.65377134 | -1.9999944 | 0.002702703 | 0.006977361 |
| GO_PEPTIDE_RECEPTOR_ACTIVITY                                                                      | 70  | -0.5161934  | -1.9985024 | 0           | 0.006995121 |
| GO_GLOMERULAR_EPITHELIUM_DEVELOPMENT                                                              | 22  | -0.6817036  | -1.9879291 | 0           | 0.007004168 |
| GO_REGULATION_OF_HEART_GROWTH                                                                     | 44  | -0.5596703  | -1.9958521 | 0           | 0.007004827 |
| PID_SMAD2_3NUCLEAR_PATHWAY                                                                        | 49  | -0.55055785 | -1.9884481 | 0           | 0.007006464 |
| GO_RESPONSE_TO_MECHANICAL_STIMULUS                                                                | 132 | -0.46826553 | -1.9964644 | 0           | 0.007007095 |
| GO_POTASSIUM_ION_TRANSMEMBRANE_TRANSPORTER_A<br>CTIVITY                                           | 74  | -0.5042151  | -1.9977273 | 0           | 0.007032418 |
| GO_TRANSFERASE_COMPLEX                                                                            | 371 | 0.4509893   | 1.8457967  | 0           | 0.00706292  |
| KEGG_LYSOSOME                                                                                     | 92  | 0.52340275  | 1.8438601  | 0           | 0.007076414 |
| REACTOME_REGULATION_OF_GLUKOKINASE_BY_GLUKOKIN<br>ASE_REGULATORY_PROTEIN                          | 20  | 0.685364    | 1.8442618  | 0           | 0.007093366 |
| GO_SPLICEOSOMAL_COMPLEX                                                                           | 91  | 0.51855636  | 1.8445472  | 0           | 0.007120594 |
| GO_MUSCLE_CONTRACTION                                                                             | 218 | -0.43703547 | -1.98489   | 0           | 0.007126275 |
| GO_SNAP_RECEPTOR_ACTIVITY                                                                         | 15  | 0.7572375   | 1.8410302  | 0           | 0.007150594 |
| GO_COFACTOR_METABOLIC_PROCESS                                                                     | 281 | 0.45747268  | 1.8418093  | 0           | 0.007156308 |
| REACTOME_ASSEMBLY_OF_THE_PRE_REPLICATIVE_COMPLE<br>X                                              | 36  | 0.61453617  | 1.8428192  | 0.001545595 | 0.007157153 |
| GO_SCF_DEPENDENT_PROTEASOMAL_UBIQUITIN_DEPENDE<br>NT_PROTEIN_CATABOLIC_PROCESS                    | 46  | 0.5766347   | 1.841986   | 0           | 0.007192837 |
| GO_RNA_POLYMERASE_COMPLEX                                                                         | 60  | 0.5674155   | 1.8410536  | 0           | 0.00720095  |
| GO_ORGANIC_ACID_CATABOLIC_PROCESS                                                                 | 190 | 0.47579455  | 1.8396686  | 0           | 0.007251093 |
| GO_N_ACETYLTRANSFERASE_ACTIVITY                                                                   | 40  | 0.5980567   | 1.8387288  | 0           | 0.007299561 |
| GO_CHROMOSOME_TELOMERIC_REGION                                                                    | 67  | 0.54554766  | 1.8379124  | 0           | 0.007333102 |
| GO_POSITIVE_REGULATION_OF_ALPHA_BETA_T_CELL_ACTI<br>VATION                                        | 44  | -0.56470865 | -1.9808512 | 0           | 0.007343523 |
| GO_MITOCHONDRIAL_RESPIRATORY_CHAIN_COMPLEX_ASS<br>SEMBLY                                          | 40  | 0.5898431   | 1.8374351  | 0.001501502 | 0.00734789  |
| REACTOME_GLOBAL_GENOME_NUCLEOTIDE_EXCISION_REP<br>AIR_GG_NER                                      | 48  | 0.5742983   | 1.8363531  | 0.001445087 | 0.007371641 |
| GO_G_PROTEIN_COUPLED_RECEPTOR_SIGNALING_PATHWA<br>Y_COUPLED_TO_CYCLIC_NUCLEOTIDE_SECOND_MESSENGER | 128 | -0.46639058 | -1.980991  | 0           | 0.0074177   |
| REACTOME_SUMOYLATION_OF_SUMOYLATION_PROTEINS                                                      | 23  | 0.66908646  | 1.8354247  | 0           | 0.007431331 |

|                                                                            |     |             |            |             |             |
|----------------------------------------------------------------------------|-----|-------------|------------|-------------|-------------|
| GO_NUCLEAR_TRANSCRIBED_MRNA_CATABOLIC_PROCESS_EXONUCLEOLYTIC               | 17  | 0.70447165  | 1.8348101  | 0           | 0.007436186 |
| REACTOME_DEFECTS_IN_VITAMIN_AND_COFACTOR_METABOLISM                        | 16  | 0.71860236  | 1.8340596  | 0.003367003 | 0.007503731 |
| REACTOME_ORC1_REMOVAL_FROM_CHROMATIN                                       | 38  | 0.60022545  | 1.8325019  | 0.001428571 | 0.007591134 |
| HALLMARK_FATTY_ACID_METABOLISM                                             | 125 | 0.49675155  | 1.8325205  | 0           | 0.007641076 |
| GO_PROTEIN_MODIFICATION_BY_SMALL_PROTEIN_CONJUGATION                       | 407 | 0.4470453   | 1.8313997  | 0           | 0.007708927 |
| GO_POSITIVE_REGULATION_OF_EPIDERMIS_DEVELOPMENT                            | 22  | -0.6593259  | -1.9763776 | 0.002557545 | 0.007742699 |
| GO_CHROMATIN_ORGANIZATION_INVOLVED_IN_REGULATION_OF_TRANSCRIPTION          | 33  | 0.61114883  | 1.8292178  | 0.001485884 | 0.007956462 |
| GO_CATALYTIC_ACTIVITY_ACTING_ON_A_TRNA                                     | 43  | 0.59048927  | 1.8285238  | 0           | 0.008005273 |
| GO_GOLGI_ORGANIZATION                                                      | 66  | 0.54040015  | 1.8276029  | 0           | 0.00803635  |
| GO_EXTRACELLULAR_MATRIX                                                    | 319 | -0.40981242 | -1.969931  | 0           | 0.008424562 |
| KEGG_UBIQUITIN_MEDIATED_PROTEOLYSIS                                        | 71  | 0.53783756  | 1.8233962  | 0           | 0.008484924 |
| GO_REGULATION_OF_CALCIUM_ION_TRANSMEMBRANE_TRANSPORTER_ACTIVITY            | 53  | -0.5238759  | -1.9653672 | 0           | 0.008504963 |
| GO_NUCLEOBASE_CONTAINING_COMPOUND_KINASE_ACTIVITY                          | 24  | 0.64706767  | 1.8237597  | 0.003034901 | 0.008508571 |
| PID_CD8_TCR_DOWNSTREAM_PATHWAY                                             | 42  | -0.5595287  | -1.9645473 | 0           | 0.008537542 |
| GO_REGULATION_OF_SYSTEM_PROCESS                                            | 335 | -0.40784022 | -1.965811  | 0           | 0.008553066 |
| GO_REGULATION_OF_MAP_KINASE_ACTIVITY                                       | 198 | -0.43807378 | -1.9678297 | 0           | 0.008555131 |
| REACTOME_G_ALPHA_I_SIGNALLING_EVENTS                                       | 222 | -0.4315862  | -1.9671581 | 0           | 0.00856985  |
| GO_REGULATION_OF_GENE_SILENCING                                            | 63  | 0.5462308   | 1.8223295  | 0           | 0.008605559 |
| GO_SMAD_PROTEIN_SIGNAL_TRANSDUCTION                                        | 48  | -0.53983825 | -1.9678311 | 0           | 0.008638191 |
| GO_AMINO_ACID_ACTIVATION                                                   | 18  | 0.70809364  | 1.8213378  | 0.003367003 | 0.008703521 |
| BIOCARTA_IL1R_PATHWAY                                                      | 19  | -0.700473   | -1.9603696 | 0           | 0.008739511 |
| GO_NEPHRON_DEVELOPMENT                                                     | 97  | -0.48359096 | -1.9620379 | 0           | 0.008740866 |
| GO_OXIDOREDUCTASE_ACTIVITY_ACTING_ON_THE_ALDEHYDE_OR_OXO_GROUP_OF_DONORS   | 33  | 0.6080834   | 1.8202238  | 0.003007519 | 0.008779418 |
| GO_MRNA_METABOLIC_PROCESS                                                  | 380 | 0.4483905   | 1.8203638  | 0           | 0.008808556 |
| GO_GOLGI_VESICLE_TRANSPORT                                                 | 206 | 0.46471432  | 1.8194715  | 0           | 0.008833149 |
| GO_ANTIGEN_PROCESSING_AND_PRESENTATION_OF_PEPTIDES_ANTIGEN_VIA_MHC_CLASS_I | 67  | 0.5381541   | 1.818199   | 0           | 0.008906409 |
| GO_RNA_SPLICING                                                            | 214 | 0.46490815  | 1.8182204  | 0           | 0.008956293 |
| GO TRABECULA MORPHOGENESIS                                                 | 29  | -0.60788393 | -1.9580495 | 0           | 0.008967541 |
| GO_SM_LIKE_PROTEIN_FAMILY_COMPLEX                                          | 32  | 0.6196485   | 1.8163177  | 0.001547988 | 0.009100249 |
| GO_CULLIN_RING_UBIQUITIN_LIGASE_COMPLEX                                    | 56  | 0.5472322   | 1.8158804  | 0           | 0.009102662 |
| REACTOME_DEFECTIVE_CFTR_CAUSES_CYSTIC_FIBROSIS                             | 31  | 0.61013454  | 1.8128203  | 0           | 0.009406909 |
| GO_CHROMOSOME_SEGREGATION                                                  | 126 | 0.4919189   | 1.8136551  | 0           | 0.009417678 |
| GO_AEROBIC_RESPIRATION                                                     | 52  | 0.5576912   | 1.8128897  | 0.003067485 | 0.009458314 |
| REACTOME_CHEMOKINE_RECEPTORS_BIND_CHEMOKINES                               | 43  | -0.55904686 | -1.9530009 | 0           | 0.009509749 |
| GO_U2_TYPE_SPLICEOSOMAL_COMPLEX                                            | 42  | 0.5859198   | 1.8112147  | 0.001402525 | 0.009561141 |
| GO_REGULATION_OF_HORMONE_BIOSYNTHETIC_PROCESS                              | 21  | -0.6614501  | -1.9497521 | 0           | 0.009567097 |
| GO_PROTEIN_TYROSINE_SERINE_THREONINE_PHOSPHATASE_ACTIVITY                  | 21  | -0.67059135 | -1.9500388 | 0.002604167 | 0.009621938 |
| GO_ENDOPLASMIC_RETICULUM_TO_GOLGI_VESICLE_MEDIATED_TRANSPORT               | 121 | 0.49759075  | 1.8101677  | 0           | 0.009658581 |
| HALLMARK_INFLAMMATORY_RESPONSE                                             | 156 | -0.44872072 | -1.9456002 | 0           | 0.009796137 |

|                                                              |     |             |            |             |             |
|--------------------------------------------------------------|-----|-------------|------------|-------------|-------------|
| GO_SENSORY_PERCEPTION_OF_SMELL                               | 30  | -0.60675144 | -1.9451574 | 0           | 0.009829696 |
| GO_SINGLE_STRANDED_DNA_BINDING                               | 62  | 0.5449585   | 1.8081453  | 0           | 0.009858414 |
| PID_FANCONI_PATHWAY                                          | 25  | 0.64330083  | 1.8082178  | 0.001587302 | 0.009907274 |
| GO_COENZYME_BIOSYNTHETIC_PROCESS                             | 91  | 0.5078087   | 1.8053493  | 0           | 0.010149414 |
| GO_ALPHA_AMINO_ACID_METABOLIC_PROCESS                        | 130 | 0.48970535  | 1.8034296  | 0           | 0.010352281 |
| REACTOME_INTERLEUKIN_4_AND_INTERLEUKIN_13_SIGNALING          | 77  | -0.507107   | -1.9400634 | 0           | 0.01044701  |
| GO KERATINOCYTE DIFFERENTIATION                              | 97  | -0.48007637 | -1.9367229 | 0           | 0.010579836 |
| GO_RENAL_SYSTEM_VASCULATURE_DEVELOPMENT                      | 21  | -0.6567393  | -1.938977  | 0           | 0.010603725 |
| GO_REGULATION_OF_ENDOTHELIAL_CELL_DIFFERENTIATION            | 27  | -0.6100973  | -1.9368578 | 0           | 0.010653899 |
| GO_GROWTH_FACTOR_ACTIVITY                                    | 80  | -0.48839608 | -1.9349307 | 0           | 0.010688055 |
| GO_CELL_DIFFERENTIATION_INVOLVED_IN_KIDNEY_DEVELOPMENT       | 42  | -0.55161524 | -1.9370567 | 0           | 0.010729739 |
| REACTOME_ACTIVATION_OF_ATR_IN_RESPONSE_TO_REPLICATION_STRESS | 20  | 0.6651733   | 1.7959538  | 0.00487013  | 0.011470369 |
| GO_TAXIS                                                     | 364 | -0.39765015 | -1.9282025 | 0           | 0.01177936  |
| GO_BRANCHED_CHAIN_AMINO_ACID_METABOLIC_PROCESS               | 18  | 0.6902902   | 1.7918103  | 0.004854369 | 0.011892466 |
| REACTOME_STABILIZATION_OF_P53                                | 27  | 0.62562436  | 1.7919117  | 0.002994012 | 0.01194694  |
| GO_MUSCLE_SYSTEM_PROCESS                                     | 272 | -0.40899387 | -1.9256126 | 0           | 0.011960006 |
| GO_DNA_DAMAGE_RESPONSE_DETECTION_OF_DNA_DAMAGE               | 23  | 0.6401427   | 1.7921007  | 0           | 0.011979396 |
| GO_REGULATION_OF_GENE_EXPRESSION_EPIGENETIC                  | 136 | 0.4825811   | 1.7924552  | 0           | 0.011981956 |
| HALLMARK_EPITHELIAL_MESENCHYMAL_TRANSITION                   | 168 | -0.4331752  | -1.9260166 | 0           | 0.012001022 |
| GO_GATED_CHANNEL_ACTIVITY                                    | 154 | -0.44430512 | -1.9238331 | 0           | 0.012271289 |
| GO_TELOMERE_ORGANIZATION                                     | 69  | 0.52924347  | 1.7888807  | 0           | 0.012338247 |
| REACTOME_NUCLEAR_PORE_COMPLEX_NPC_DISASSEMBLY                | 23  | 0.64867723  | 1.7884285  | 0           | 0.012345002 |
| GO_VESICLE_TETHERING_COMPLEX                                 | 25  | 0.6442992   | 1.7877934  | 0           | 0.012388057 |
| GO_EPITHELIAL_CELL_DEVELOPMENT                               | 124 | -0.458995   | -1.9214529 | 0           | 0.012401589 |
| KEGG_CYTOKINE_CYTOKINE_RECEPTOR_INTERACTION                  | 158 | -0.44570246 | -1.9223311 | 0           | 0.012431212 |
| GO_RESPONSE_TO_FIBROBLAST_GROWTH_FACTOR                      | 83  | -0.48260054 | -1.9187119 | 0           | 0.012433007 |
| GO_VOLTAGE_GATED_CATION_CHANNEL_ACTIVITY                     | 61  | -0.5175986  | -1.9198972 | 0           | 0.012453399 |
| GO_NEPHRON_EPITHELIUM_DEVELOPMENT                            | 74  | -0.4999765  | -1.9189496 | 0           | 0.012462321 |
| GO_HEART TRABECULA MORPHOGENESIS                             | 21  | -0.6405385  | -1.9202683 | 0           | 0.012470382 |
| GO_CATION_CHANNEL_ACTIVITY                                   | 145 | -0.44002262 | -1.9180264 | 0           | 0.01249359  |
| GO_POSITIVE_REGULATION_OF_T_CELL_PROLIFERATION               | 59  | -0.51567304 | -1.917592  | 0           | 0.012503622 |
| GO_EXTRACELLULAR_LIGAND_GATED_ION_CHANNEL_ACTIVITY           | 34  | -0.5891157  | -1.9203588 | 0           | 0.012540673 |
| REACTOME_DISORDERS_OF_TRANSMEMBRANE_TRANSPORTERS             | 105 | 0.49642152  | 1.7854438  | 0           | 0.012689888 |
| GO_NEGATIVE_REGULATION_OF_LEUKOCYTE_APOPTOTIC_PROCESS        | 36  | -0.5578643  | -1.9145255 | 0           | 0.012713629 |
| GO_NEGATIVE_REGULATION_OF_NOTCH_SIGNALING_PATHWAY            | 21  | -0.656335   | -1.914539  | 0.002923977 | 0.012793971 |
| GO_LABYRINTHINE_LAYER_DEVELOPMENT                            | 34  | -0.57256866 | -1.9147514 | 0           | 0.012850844 |
| GO_G_PROTEIN_COUPLED_AMINE_RECEPTOR_ACTIVITY                 | 21  | -0.6497415  | -1.9094156 | 0           | 0.013066417 |
| GO_REGULATION_OF_EPIDERMAL_CELL_DIFFERENTIATION              | 34  | -0.5852781  | -1.9111621 | 0           | 0.013138789 |
| NABA_PROTEOGLYCANS                                           | 18  | -0.688051   | -1.9094517 | 0.00257732  | 0.013146989 |

|                                                                                                          |     |             |            |             |             |
|----------------------------------------------------------------------------------------------------------|-----|-------------|------------|-------------|-------------|
| GO_SODIUM_ION_TRANSMEMBRANE_TRANSPORTER_ACTIV<br>ITY                                                     | 89  | -0.47590783 | -1.9096202 | 0           | 0.013216655 |
| GO_ACUTE_PHASE_RESPONSE                                                                                  | 29  | -0.6004407  | -1.9062278 | 0.002747253 | 0.013463715 |
| GO_REGULATION_OF_MONONUCLEAR_CELL_MIGRATION                                                              | 29  | -0.60819113 | -1.904014  | 0           | 0.013677218 |
| GO_LIPOPOLYSACCHARIDE_MEDIATED_SIGNALING_PATHW<br>AY                                                     | 43  | -0.5512617  | -1.9047668 | 0           | 0.013678353 |
| GO_ADENYLATE_CYCLASE_ACTIVATING_G_PROTEIN_COUPL<br>ED_RECEPTOR_SIGNALING_PATHWAY                         | 68  | -0.4957215  | -1.9033848 | 0           | 0.013710627 |
| GO_DNA_REPAIR_COMPLEX                                                                                    | 23  | 0.6509176   | 1.7794026  | 0.001569859 | 0.013712969 |
| GO_OXIDOREDUCTASE_ACTIVITY_ACTING_ON_THE_ALDEHY<br>DE_OR_OXO_GROUP_OF_DONORS_NAD_OR_NADP_AS_ACC<br>EPTOR | 27  | 0.62651885  | 1.7788657  | 0.001501502 | 0.013726437 |
| GO_PROTEIN_MODIFICATION_BY_SMALL_PROTEIN_CONJUG<br>ATION_OR_REMOVAL                                      | 478 | 0.43045953  | 1.7771645  | 0           | 0.013972755 |
| GO_REGULATION_OF_MUSCLE_CONTRACTION                                                                      | 110 | -0.45476702 | -1.9012053 | 0           | 0.014022192 |
| GO_MISMATCH_REPAIR                                                                                       | 23  | 0.645497    | 1.7764806  | 0.001550388 | 0.014031099 |
| REACTOME_FORMATION_OF_RNA_POL_II_ELONGATION_CO<br>MPLEX                                                  | 31  | 0.60883313  | 1.7759811  | 0.003058104 | 0.0140534   |
| REACTOME_FORMATION_OF_THE_EARLY_ELONGATION_CO<br>MPLEX                                                   | 22  | 0.6453328   | 1.7751867  | 0.001602564 | 0.014135665 |
| GO_TRANSLATION_REGULATOR_ACTIVITY                                                                        | 58  | 0.546479    | 1.7737389  | 0           | 0.014283847 |
| GO_COENZYME_BINDING                                                                                      | 213 | 0.4495609   | 1.774064   | 0           | 0.014305129 |
| GO_TELOMERIC_DNA_BINDING                                                                                 | 21  | 0.6492382   | 1.7711163  | 0.003139718 | 0.014463687 |
| GO_VESICLE_MEDIATED_TRANSPORT_TO_THE_PLASMA_ME<br>MBRANE                                                 | 46  | 0.5581218   | 1.7719768  | 0           | 0.014473281 |
| KEGG_FATTY_ACID_METABOLISM                                                                               | 33  | 0.5981525   | 1.7722025  | 0.004385965 | 0.014485148 |
| GO_CYTOPLASMIC_TRANSLATION                                                                               | 44  | 0.57413334  | 1.7712927  | 0           | 0.01450612  |
| GO_NUCLEOTIDE_EXCISION_REPAIR_DNA_INCISION_3_TO_L<br>ESION                                               | 16  | 0.70706505  | 1.769549   | 0.003262643 | 0.014596412 |
| GO_SKIN_DEVELOPMENT                                                                                      | 159 | -0.43942767 | -1.897268  | 0           | 0.014606915 |
| REACTOME_SUMOYLATION_OF_DNA_REPLICATION_PROTEI<br>NS                                                     | 31  | 0.60492355  | 1.7697774  | 0.003034901 | 0.014622149 |
| REACTOME_NEGATIVE_REGULATION_OF_MAPK_PATHWAY                                                             | 20  | -0.657477   | -1.8967073 | 0.005221932 | 0.014623432 |
| HALLMARK_APOPTOSIS                                                                                       | 123 | -0.45507953 | -1.8964316 | 0           | 0.014628401 |
| GO_REGULATION_OF_MAPK_CASCADE                                                                            | 417 | -0.39046237 | -1.889045  | 0           | 0.01510893  |
| GO_GTP_METABOLIC_PROCESS                                                                                 | 16  | 0.699257    | 1.7663375  | 0.006768189 | 0.015137916 |
| REACTOME_BRANCHED_CHAIN_AMINO_ACID_CATABOLISM                                                            | 19  | 0.6772058   | 1.765943   | 0           | 0.015143588 |
| GO_POSITIVE_REGULATION_OF_LEUKOCYTE_PROLIFERATIO<br>N                                                    | 85  | -0.47410256 | -1.8892771 | 0           | 0.015173189 |
| GO_REGULATION_OF_OSTEOBLAST_DIFFERENTIATION                                                              | 65  | -0.49469036 | -1.8880732 | 0           | 0.015218999 |
| GO_COLLAGEN_CONTAINING_EXTRACELLULAR_MATRIX                                                              | 264 | -0.40621063 | -1.8876969 | 0           | 0.015231589 |
| REACTOME_REGULATION_OF_RAS_BY_GAPS                                                                       | 32  | 0.6038214   | 1.7652178  | 0           | 0.015235784 |
| GO_EMBRYONIC_PLACENTA_MORPHOGENESIS                                                                      | 16  | -0.7025221  | -1.8900423 | 0.002754821 | 0.015259264 |
| GO_NEUROPEPTIDE_RECEPTOR_ACTIVITY                                                                        | 17  | -0.67681706 | -1.8893901 | 0.002638523 | 0.015271081 |
| GO_LEUKOCYTE_CELL_CELL_ADHESION                                                                          | 223 | -0.4132854  | -1.8915584 | 0           | 0.015289564 |
| GO_ERK1_AND_ERK2_CASCADE                                                                                 | 169 | -0.43025213 | -1.8912216 | 0           | 0.015290741 |
| HALLMARK_IL2_STAT5_SIGNALING                                                                             | 137 | -0.43995008 | -1.8903222 | 0           | 0.015325598 |
| GO_PROTEIN_MONOUBIQUITINATION                                                                            | 33  | 0.5855031   | 1.7642695  | 0.003076923 | 0.015364065 |
| GO_CALCIIUM_CHANNEL_COMPLEX                                                                              | 31  | -0.5942639  | -1.8847089 | 0           | 0.015446357 |

|                                                                   |     |             |            |             |             |
|-------------------------------------------------------------------|-----|-------------|------------|-------------|-------------|
| GO_EMBRYONIC_PLACENTA_DEVELOPMENT                                 | 53  | -0.5236325  | -1.8852146 | 0           | 0.015446802 |
| GO_REGULATION_OF_TELOMERE_MAINTENANCE                             | 36  | 0.5828294   | 1.7634368  | 0.00155521  | 0.01544768  |
| GO_ANTERIOR_POSTERIOR_AXIS_SPECIFICATION                          | 27  | -0.60042775 | -1.8853918 | 0.002680965 | 0.015511027 |
| GO_EPITHELIAL_CELL_DIFFERENTIATION_INVOLVED_IN_KIDNEY_DEVELOPMENT | 36  | -0.55947363 | -1.8811935 | 0           | 0.0158957   |
| GO_GLIAL_CELL_ACTIVATION                                          | 38  | -0.55190367 | -1.8784211 | 0           | 0.016017057 |
| GO_MUSCLE_FILAMENT_SLIDING                                        | 23  | -0.61734027 | -1.8796567 | 0.002739726 | 0.016060172 |
| GO_REGULATION_OF_CELLULAR_AMINO_ACID_METABOLIC_PROCESS            | 37  | 0.5803683   | 1.7601061  | 0.001506024 | 0.016112527 |
| GO_KERATIN_FILAMENT                                               | 16  | -0.70195544 | -1.8784598 | 0.002739726 | 0.016113546 |
| GO_MITOCHONDRIAL_ENVELOPE                                         | 364 | 0.43230698  | 1.7587173  | 0           | 0.016114874 |
| GO_STRUCTURAL_CONSTITUENT_OF_NUCLEAR_PORE                         | 16  | 0.69870436  | 1.7583045  | 0.001602564 | 0.016115801 |
| GO_NEGATIVE_REGULATION_OF_LEUKOCYTE_PROLIFERATION                 | 51  | -0.51888114 | -1.8788309 | 0           | 0.016128588 |
| GO_VESICLE_DOCKING                                                | 33  | 0.5900621   | 1.7588931  | 0.001515152 | 0.016159497 |
| GO_MODIFICATION_DEPENDENT_MACROMOLECULE_CATABOLIC_PROCESS         | 305 | 0.43878365  | 1.7595412  | 0           | 0.016162077 |
| GO_FLAVIN_ADENINE_DINUCLEOTIDE_BINDING                            | 63  | 0.523986    | 1.7591093  | 0.001428571 | 0.016185135 |
| GO_SMALL_MOLECULE_CATABOLIC_PROCESS                               | 296 | 0.43835112  | 1.756995   | 0           | 0.016311329 |
| REACTOME_DEGRADATION_OF_GLI1_BY_THE_PROTEASOME                    | 31  | 0.6018632   | 1.7562215  | 0.001594896 | 0.0164028   |
| REACTOME_PROCESSING_OF_CAPPED_INTRON_CONTAINING_PRE_MRNA          | 129 | 0.47370562  | 1.7554586  | 0           | 0.016484335 |
| GO_INTEGRIN_ACTIVATION                                            | 16  | -0.6774438  | -1.8751273 | 0           | 0.016646069 |
| GO_NUCLEAR_PORE                                                   | 48  | 0.5550238   | 1.7536063  | 0           | 0.016714148 |
| GO_RNA_LOCALIZATION                                               | 120 | 0.47480842  | 1.7539221  | 0.001285347 | 0.016747868 |
| GO_N_ACYLTRANSFERASE_ACTIVITY                                     | 48  | 0.55137396  | 1.7524552  | 0.002923977 | 0.016855335 |
| REACTOME_CELLULAR_RESPONSE_TO_HYPOXIA                             | 39  | 0.57078254  | 1.7509478  | 0           | 0.016871972 |
| GO_TRANSCRIPTION_FACTOR_TFIID_COMPLEX                             | 22  | 0.6429887   | 1.7513654  | 0.001675042 | 0.016884144 |
| GO_OXIDOREDUCTASE_ACTIVITY_ACTING_ON_A_SULFUR_GROUP_OF_DONORS     | 40  | 0.5545465   | 1.7515926  | 0.001488095 | 0.016905423 |
| GO_NUCLEAR_CHROMOSOME_SEGREGATION                                 | 98  | 0.489486    | 1.7519269  | 0           | 0.016917652 |
| GO_INNER_MITOCHONDRIAL_MEMBRANE_ORGANIZATION                      | 16  | 0.6906567   | 1.7502285  | 0           | 0.016972806 |
| GO_REGULATION_OF_LYMPHOCYTE_ACTIVATION                            | 272 | -0.39963704 | -1.8722851 | 0           | 0.017083788 |
| GO_REGULATION_OF_STRIATED_MUSCLE_CELL_DIFFERENTIATION             | 51  | -0.52236295 | -1.8700546 | 0           | 0.017365895 |
| GO_POSITIVE_REGULATION_OF_VIRAL_LIFE_CYCLE                        | 32  | 0.5859955   | 1.7481697  | 0.003062787 | 0.01740701  |
| REACTOME_POTASSIUM_CHANNELS                                       | 50  | -0.5136193  | -1.8694186 | 0.002994012 | 0.017425383 |
| GO_ARACHIDONIC_ACID_SECRETION                                     | 18  | -0.6489829  | -1.8702117 | 0           | 0.017468046 |
| GO_GLYCOSYL_COMPOUND_METABOLIC_PROCESS                            | 82  | 0.5029329   | 1.7474968  | 0           | 0.017495478 |
| GO_CELL_FATE_COMMITMENT                                           | 125 | -0.4428935  | -1.8678691 | 0           | 0.017674277 |
| GO_POSTREPLICATION_REPAIR                                         | 26  | 0.62022406  | 1.7452204  | 0.00309119  | 0.017945465 |
| REACTOME_ORGANELLE_BIOGENESIS_AND_MAINTENANCE                     | 145 | 0.46194667  | 1.7431151  | 0           | 0.01803792  |
| GO_PURINE_NUCLEOSIDE_METABOLIC_PROCESS                            | 36  | 0.58245236  | 1.7434946  | 0           | 0.018039856 |
| REACTOME_ABC_TRANSPORTER_DISORDERS                                | 41  | 0.56076825  | 1.7444644  | 0.001501502 | 0.018051779 |
| GO_POSTTRANSCRIPTIONAL_REGULATION_OF_GENE_EXPRESSION              | 295 | 0.4345837   | 1.7440513  | 0           | 0.018058741 |
| GO_CHROMOSOME_LOCALIZATION                                        | 36  | 0.5803406   | 1.7436644  | 0.001510574 | 0.01808333  |
| GO_POSITIVE_REGULATION_OF_EPITHELIAL_CELL_DIFFERENTIATION         | 40  | -0.542404   | -1.8645176 | 0           | 0.018135538 |

|                                                                                      |     |             |            |             |             |
|--------------------------------------------------------------------------------------|-----|-------------|------------|-------------|-------------|
| GO_REGULATION_OF_MONOCYTE_CHEMOTAXIS                                                 | 16  | -0.68380415 | -1.863756  | 0           | 0.018138122 |
| GO_TRANSCRIPTION_PREINITIATION_COMPLEX_ASSEMBLY                                      | 23  | 0.6360431   | 1.7421759  | 0.001607717 | 0.01818871  |
| GO_T_CELL_PROLIFERATION                                                              | 121 | -0.43880042 | -1.8628409 | 0           | 0.018188804 |
| GO_CUL4_RING_E3_UBIQUITIN_LIGASE_COMPLEX                                             | 15  | 0.6955625   | 1.7413188  | 0.006644518 | 0.018207107 |
| GO_POSITIVE_REGULATION_OF_ACUTE_INFLAMMATORY_RESPONSE                                | 16  | -0.68204594 | -1.8647062 | 0.004901961 | 0.018210031 |
| GO_POST_GOLGI_VESICLE_MEDIATED_TRANSPORT                                             | 57  | 0.5247226   | 1.7416621  | 0           | 0.018215558 |
| GO_REGULATION_OF_MYELOID_CELL_DIFFERENTIATION                                        | 127 | -0.43249637 | -1.8649454 | 0           | 0.018226897 |
| GO_LEUKOCYTE_PROLIFERATION                                                           | 189 | -0.4141077  | -1.8612542 | 0           | 0.018384881 |
| GO_NEGATIVE_REGULATION_OF_LYMPHOCYTE_ACTIVATION                                      | 96  | -0.47138986 | -1.8605267 | 0           | 0.018492602 |
| GO_SENSORY_PERCEPTION                                                                | 258 | -0.3946183  | -1.8597388 | 0           | 0.018597461 |
| REACTOME_STRIATED_MUSCLE_CONTRACTION                                                 | 21  | -0.64133656 | -1.858852  | 0.005277045 | 0.018675288 |
| GO_METANEPHROS_DEVELOPMENT                                                           | 60  | -0.49539807 | -1.8578901 | 0           | 0.018684711 |
| GO_REGULATION_OF_ORGAN_GROWTH                                                        | 62  | -0.48644748 | -1.8576059 | 0           | 0.018685363 |
| GO_NEGATIVE_REGULATION_OF_INTERLEUKIN_6_PRODUCTIION                                  | 22  | -0.6168472  | -1.8580679 | 0.002793296 | 0.018730383 |
| GO_VESICLE_TARGETING                                                                 | 56  | 0.529704    | 1.738012   | 0.004207574 | 0.018782025 |
| REACTOME_IMMUNOREGULATORY_INTERACTIONS_BETWEEN_A_LYMPHOID_AND_A_NON_LYMPHOID_CELL    | 88  | -0.45881718 | -1.8567364 | 0           | 0.018785492 |
| REACTOME_TRNA_AMINOACYLATION                                                         | 15  | 0.7072465   | 1.7386051  | 0.008156607 | 0.0188038   |
| GO_VACUOLE_ORGANIZATION                                                              | 85  | 0.49518904  | 1.7380172  | 0.001369863 | 0.01886195  |
| REACTOME_DEADENYLATION_DEPENDENT_MRNA_DECAY                                          | 22  | 0.64237684  | 1.7365618  | 0.004918033 | 0.018892007 |
| REACTOME_CELL_CYCLE                                                                  | 315 | 0.42963377  | 1.7360619  | 0           | 0.01891793  |
| HALLMARK_ADIPOGENESIS                                                                | 143 | 0.46355283  | 1.7357562  | 0           | 0.018926809 |
| GO_REGULATION_OF_VASOCONSTRICTION                                                    | 43  | -0.51577455 | -1.8554919 | 0           | 0.018931331 |
| GO_SISTER_CHROMATID_SEGREGATION                                                      | 77  | 0.49838772  | 1.7366375  | 0           | 0.018954275 |
| GO_HISTONE_UBIQUITINATION                                                            | 18  | 0.68122333  | 1.7348877  | 0           | 0.019033464 |
| GO_CILIUM_ORGANIZATION                                                               | 146 | 0.46270522  | 1.7366376  | 0           | 0.019034252 |
| HALLMARK_P53_PATHWAY                                                                 | 148 | -0.43002358 | -1.8467236 | 0           | 0.01937803  |
| GO_CYCLIC_NUCLEOTIDE_METABOLIC_PROCESS                                               | 22  | -0.61902225 | -1.846899  | 0           | 0.019424057 |
| GO_KIDNEY_EPITHELIUM_DEVELOPMENT                                                     | 95  | -0.464867   | -1.8459358 | 0           | 0.019441944 |
| KEGG_SNARE_INTERACTIONS_IN_VESICULAR_TRANSPORT                                       | 20  | 0.64081913  | 1.7322505  | 0.003372681 | 0.01946423  |
| GO_REGULATION_OF_T_CELL_ACTIVATION                                                   | 199 | -0.40989473 | -1.8453549 | 0           | 0.019471783 |
| GO_POSITIVE_T_CELL_SELECTION                                                         | 18  | -0.65229833 | -1.8470756 | 0.005333333 | 0.019478884 |
| GO_CELL_ADHESION_MEDIATOR_ACTIVITY                                                   | 35  | -0.5518729  | -1.8520396 | 0.003003003 | 0.01949294  |
| REACTOME_RNA_POLYMERASE_II_TRANSCRIBES_SNRNA_GENES                                   | 36  | 0.56717813  | 1.7324384  | 0.006060606 | 0.019496612 |
| GO_OXIDOREDUCTASE_ACTIVITY_ACTING_ON_NAD_P_H_QUINONE_OR_SIMILAR_COMPOUND_AS_ACCEPTOR | 35  | 0.57788557  | 1.7318101  | 0.003174603 | 0.019503651 |
| GO_CYTOKINE_RECEPTOR_BINDING                                                         | 160 | -0.42685625 | -1.8471886 | 0           | 0.019525658 |
| GO_DNA_CONFORMATION_CHANGE                                                           | 127 | 0.46381328  | 1.7325772  | 0           | 0.01955731  |
| GO_POSITIVE_REGULATION_OF_LEUKOCYTE_CELL_CELL_ADHESION                               | 146 | -0.42523924 | -1.848347  | 0           | 0.019589243 |
| PID_IL23_PATHWAY                                                                     | 26  | -0.6009779  | -1.8472469 | 0.002564103 | 0.019624772 |
| GO_MESENCHYMAL_CELL_PROLIFERATION                                                    | 35  | -0.5583865  | -1.8503741 | 0           | 0.019638222 |
| GO_NEGATIVE_REGULATION_OF_KINASE_ACTIVITY                                            | 143 | -0.42714566 | -1.8483611 | 0           | 0.01969022  |
| GO_ADENYLATE_CYCLASE_INHIBITING_G_PROTEIN_COUPLED_RECEPTOR_SIGNALING_PATHWAY         | 46  | -0.5271379  | -1.8416262 | 0.003289474 | 0.019694751 |

|                                                                                        |     |             |            |             |             |
|----------------------------------------------------------------------------------------|-----|-------------|------------|-------------|-------------|
| GO_TRANSFORMING_GROWTH_FACTOR_BETA_RECEPTOR_BINDING                                    | 30  | -0.57461035 | -1.8504515 | 0           | 0.019714786 |
| GO_STRIATED_MUSCLE_CONTRACTION                                                         | 104 | -0.43897718 | -1.8473178 | 0           | 0.019716127 |
| KEGG_PROANOATE_METABOLISM                                                              | 24  | 0.62758297  | 1.730608   | 0.003215434 | 0.019751124 |
| HALLMARK_MYOGENESIS                                                                    | 156 | -0.42450222 | -1.8405374 | 0           | 0.019757092 |
| GO_ANCHORED_COMPONENT_OF_MEMBRANE                                                      | 82  | -0.4711813  | -1.848564  | 0           | 0.01977403  |
| GO_EXTRACELLULAR_STRUCTURE_ORGANIZATION                                                | 242 | -0.3996081  | -1.8407578 | 0           | 0.019787624 |
| GO_NEGATIVE_REGULATION_OF_CHEMOTAXIS                                                   | 34  | -0.5585958  | -1.8416489 | 0.002793296 | 0.019788984 |
| GO_NEGATIVE_REGULATION_OF_DNA_BINDING                                                  | 30  | -0.57880163 | -1.8429723 | 0           | 0.019794507 |
| GO_MEMBRANE_REPOLARIZATION_DURING_ACTION_POTENTIAL                                     | 15  | -0.6844992  | -1.841906  | 0.005076142 | 0.019834546 |
| REACTOME_OLFACTORY_SIGNALING_PATHWAY                                                   | 24  | -0.5994757  | -1.8485821 | 0.00248139  | 0.019868275 |
| GO_MESENCHYME_MORPHOGENESIS                                                            | 34  | -0.546958   | -1.8431175 | 0.00286533  | 0.019882346 |
| GO_METANEPHRIC_NEPHRON_DEVELOPMENT                                                     | 24  | -0.6130286  | -1.8420306 | 0.002840909 | 0.019889373 |
| GO_SODIUM_ION_HOMEOSTASIS                                                              | 40  | -0.54260725 | -1.848804  | 0.002816901 | 0.019954642 |
| REACTOME_CARDIAC_CONDUCTION                                                            | 71  | -0.48946163 | -1.8432817 | 0           | 0.019962925 |
| REACTOME_CLASS_B_2_SECRETIN_FAMILY_RECEPTORS                                           | 48  | -0.50909984 | -1.8388801 | 0           | 0.020025056 |
| REACTOME_DEGRADATION_OF_AXIN                                                           | 30  | 0.6006133   | 1.7287382  | 0.001545595 | 0.020100027 |
| GO_MACROAUTOPHAGY                                                                      | 150 | 0.45706385  | 1.728376   | 0           | 0.020125577 |
| REACTOME_TRANSCRIPTIONAL_REGULATION_OF GRANULOCYTOGENESIS                              | 18  | -0.6575907  | -1.8381693 | 0.002538071 | 0.020139452 |
| GO_POTASSIUM_CHANNEL_COMPLEX                                                           | 42  | -0.5197448  | -1.8376628 | 0           | 0.020156747 |
| GO_NEGATIVE_REGULATION_OF_SMOOTH_MUSCLE_CELL_PROLIFERATION                             | 32  | -0.56074864 | -1.8369408 | 0.002638523 | 0.020167094 |
| GO_HUMORAL_IMMUNE_RESPONSE                                                             | 163 | -0.42214218 | -1.8363708 | 0           | 0.020170175 |
| GO_TRICARBOXYLIC_ACID_CYCLE                                                            | 26  | 0.6009178   | 1.72714    | 0.0064      | 0.020181654 |
| GO_RNA_EXPORT_FROM_NUCLEUS                                                             | 74  | 0.50937635  | 1.7277544  | 0           | 0.020191437 |
| GO_REGULATION_OF_SMOOTH_MUSCLE_CONTRACTION                                             | 40  | -0.53416795 | -1.8346366 | 0           | 0.02019812  |
| GO_CALCIIUM_INDEPENDENT_CELL_CELL_ADHESION_VIA_PLASMA_MEMBRANE_CELL_ADHESION_MOLECULES | 16  | -0.6654321  | -1.8364962 | 0           | 0.020215401 |
| GO_DNA_GEOMETRIC_CHANGE                                                                | 67  | 0.51122093  | 1.7271593  | 0.00136612  | 0.020262059 |
| HALLMARK_ESTROGEN_RESPONSE_EARLY                                                       | 141 | -0.42475492 | -1.8346716 | 0           | 0.020274185 |
| GO_SMALL_NUCLEAR_RIBONUCLEOPROTEIN_COMPLEX                                             | 27  | 0.6134495   | 1.7263799  | 0.004622496 | 0.020278491 |
| GO_ORGANELLE_FUSION                                                                    | 61  | 0.515311    | 1.7259413  | 0           | 0.020315731 |
| KEGG_CARDIAC_MUSCLE_CONTRACTION                                                        | 42  | -0.5298168  | -1.8352118 | 0           | 0.020326585 |
| GO_REGULATION_OF_T_CELL_APOPTOTIC_PROCESS                                              | 21  | -0.6180533  | -1.8349324 | 0.002762431 | 0.020326963 |
| GO_REGULATION_OF_CHEMOTAXIS                                                            | 132 | -0.43428013 | -1.8259838 | 0           | 0.020727254 |
| GO_POSITIVE_REGULATION_OF_P38MAPK_CASCADE                                              | 18  | -0.6506764  | -1.8318026 | 0.002506266 | 0.020781038 |
| PID_NFAT_TFPATHWAY                                                                     | 26  | -0.58701026 | -1.8260483 | 0.002808989 | 0.020800795 |
| GO_NEGATIVE_REGULATION_OF_FAT_CELL_DIFFERENTIATION                                     | 25  | -0.6133651  | -1.8252958 | 0.002801121 | 0.020821093 |
| GO_POSITIVE_REGULATION_OF_EPITHELIAL_CELL_PROLIFERATION                                | 118 | -0.4447715  | -1.8263592 | 0           | 0.02082416  |
| GO_MESONEPHROS_DEVELOPMENT                                                             | 64  | -0.47451735 | -1.831206  | 0           | 0.020839952 |
| GO_PHOSPHATE_ION_TRANSPORT                                                             | 17  | -0.6615938  | -1.8267114 | 0.002590674 | 0.020848162 |
| GO_POSITIVE_REGULATION_OF_ALPHA_BETA_T_CELL_DIFFERENTIATION                            | 33  | -0.5630678  | -1.8278525 | 0.002985075 | 0.02087555  |
| GO_HOMOPHILIC_CELL_ADHESION_VIA_PLASMA_MEMBRANE_ADHESION_MOLECULES                     | 65  | -0.47493827 | -1.826814  | 0           | 0.020908121 |
| GO_TRANSCRIPTION_COFACTOR_BINDING                                                      | 23  | -0.6002115  | -1.828412  | 0           | 0.02094617  |
| GO_POSITIVE_REGULATION_OF_HEART_CONTRACTION                                            | 23  | -0.6091344  | -1.8279096 | 0.005263158 | 0.02095895  |
| GO_LEUKOCYTE_CHEMOTAXIS                                                                | 139 | -0.42154792 | -1.826859  | 0           | 0.020998243 |



|                                                                        |     |             |            |             |             |
|------------------------------------------------------------------------|-----|-------------|------------|-------------|-------------|
| GO_PASSIVE_TRANSMEMBRANE_TRANSPORTER_ACTIVITY                          | 203 | -0.40696776 | -1.8295085 | 0           | 0.021011971 |
| GO_GLAND_MORPHOGENESIS                                                 | 75  | -0.46808878 | -1.8285689 | 0           | 0.021015342 |
| GO_CYTOPLASMIC_TRANSLATIONAL_INITIATION                                | 20  | 0.6580612   | 1.7230135  | 0.001628664 | 0.02102257  |
| GO_POSITIVE_REGULATION_OF_ENDOTHELIAL_CELL_PROLIFERATION               | 60  | -0.48799828 | -1.8240491 | 0.003436426 | 0.021048108 |
| GO_LEUKOCYTE_ACTIVATION_INVOLVED_IN_INFLAMMATORY_RESPONSE              | 34  | -0.5466276  | -1.8287144 | 0           | 0.021092845 |
| GO_FLUID_TRANSPORT                                                     | 18  | -0.65280104 | -1.8295691 | 0.004889976 | 0.021105358 |
| GO_MUSCLE_CELL_PROLIFERATION                                           | 131 | -0.43116164 | -1.8228403 | 0           | 0.021187786 |
| GO_ACTOMYOSIN_STRUCTURE_ORGANIZATION                                   | 105 | -0.4389938  | -1.821779  | 0           | 0.021370174 |
| GO_AUTOPHAGOSOME                                                       | 49  | 0.5342944   | 1.7204157  | 0           | 0.02168679  |
| GO_REGULATION_OF_HETEROTYPIC_CELL_CELL_ADHESION                        | 16  | -0.67716676 | -1.8190105 | 0.004987531 | 0.021904714 |
| GO_LYMPHOCYTE_DIFFERENTIATION                                          | 205 | -0.40701136 | -1.817393  | 0           | 0.02229321  |
| GO_REGULATION_OF_CARDIAC_MUSCLE_CELL_DIFFERENTIATION                   | 18  | -0.6364772  | -1.8155757 | 0           | 0.022471683 |
| GO_POSITIVE_REGULATION_OF_CANONICAL_WNT_SIGNALING_PATHWAY              | 79  | 0.49877203  | 1.7173448  | 0           | 0.022520348 |
| KEGG_HEMATOPOIETIC_CELL_LINEAGE                                        | 57  | -0.49014613 | -1.8157111 | 0           | 0.022521524 |
| GO_REGULATION_OF_VASCULATURE_DEVELOPMENT                               | 219 | -0.39553088 | -1.815763  | 0           | 0.022606952 |
| GO_CATION_CHANNEL_COMPLEX                                              | 93  | -0.44575298 | -1.8140665 | 0           | 0.022612993 |
| GO_DEFENSE_RESPONSE_TO_BACTERIUM                                       | 135 | -0.42673174 | -1.8142966 | 0           | 0.02263542  |
| GO GRANULOCYTE MIGRATION                                               | 90  | -0.44729134 | -1.8130182 | 0           | 0.022637373 |
| GO_CELLULAR_RESPONSE_TO_VASCULAR_ENDOTHELIAL_GROWTH_FACTOR_STIMULUS    | 34  | -0.54887277 | -1.8130264 | 0           | 0.022721577 |
| GO_REGULATION_OF_INTERLEUKIN_1_SECRETION                               | 28  | -0.56806415 | -1.8109093 | 0.002680965 | 0.022889948 |
| GO_MITOCHONDRIAL_SMALL_RIBOSOMAL_SUBUNIT                               | 15  | 0.6951907   | 1.7157826  | 0.006734007 | 0.02289533  |
| GO_POSITIVE_REGULATION_OF_LEUKOCYTE_DIFFERENTIATION                    | 97  | -0.43707404 | -1.8111827 | 0           | 0.022900403 |
| GO_REGULATION_OF_ASTROCYTE_DIFFERENTIATION                             | 19  | -0.637939   | -1.8114388 | 0.002747253 | 0.022902483 |
| GO_REGULATION_OF_POSTTRANSCRIPTIONAL_GENE_SILENCING                    | 52  | 0.52410436  | 1.7152863  | 0           | 0.022974612 |
| REACTOME_DISEASES_ASSOCIATED_WITH_GLYCOSYLATION_PRECURSOR_BIOSYNTHESIS | 17  | 0.67750806  | 1.7148722  | 0.008223685 | 0.023000838 |
| REACTOME_ABC_FAMILY_PROTEINS_MEDIATED_TRANSPORT                        | 54  | 0.522442    | 1.7139419  | 0           | 0.023180244 |
| GO_SMOOTH_MUSCLE_CELL_PROLIFERATION                                    | 96  | -0.44829518 | -1.8094423 | 0           | 0.02318038  |
| GO_EPITHELIAL_CELL_DIFFERENTIATION                                     | 378 | -0.3778311  | -1.8097397 | 0           | 0.023184452 |
| GO_GOLGI_LUMEN                                                         | 56  | -0.4971282  | -1.8088278 | 0.003322259 | 0.023242963 |
| GO_TRANSLATIONAL_INITIATION                                            | 83  | 0.49625683  | 1.713192   | 0.001402525 | 0.023293748 |
| GO_RESPONSE_TO_MINERALOCORTICOID                                       | 22  | -0.61508244 | -1.8071827 | 0.005376344 | 0.023396105 |
| GO_NEUROINFLAMMATORY_RESPONSE                                          | 47  | -0.5126582  | -1.8078758 | 0           | 0.023418868 |
| GO_ASTROCYTE_DIFFERENTIATION                                           | 48  | -0.5010519  | -1.8075451 | 0           | 0.023420395 |
| KEGG_PROTEASOME                                                        | 24  | 0.6175765   | 1.711341   | 0.00152207  | 0.023746617 |
| GO_OXIDOREDUCTASE_COMPLEX                                              | 65  | 0.5058043   | 1.7090299  | 0           | 0.024191849 |
| REACTOME_CELL_CYCLE_MITOTIC                                            | 265 | 0.42801258  | 1.7093279  | 0           | 0.02420398  |
| REACTOME_DUAL_INCISION_IN_GG_NER                                       | 27  | 0.5962728   | 1.709621   | 0.00462963  | 0.024223963 |
| GO_T_CELL_ACTIVATION_INVOLVED_IN_IMMUNE_RESPONSE                       | 64  | -0.46681315 | -1.8020422 | 0.003597122 | 0.024397554 |
| GO_T_CELL_DIFFERENTIATION_INVOLVED_IN_IMMUNE_RESPONSE                  | 40  | -0.5206889  | -1.8025618 | 0           | 0.024399633 |

|                                                                                                                    |     |             |            |             |             |
|--------------------------------------------------------------------------------------------------------------------|-----|-------------|------------|-------------|-------------|
| HALLMARK_UV_RESPONSE_UP                                                                                            | 116 | -0.4306259  | -1.8028598 | 0           | 0.02441479  |
| GO_CARTILAGE_DEVELOPMENT                                                                                           | 114 | -0.4345809  | -1.800866  | 0           | 0.02446547  |
| GO_HEART_GROWTH                                                                                                    | 56  | -0.48746094 | -1.800586  | 0           | 0.024470696 |
| GO_POSITIVE_REGULATION_OF_SMOOTH_MUSCLE_CELL_P<br>ROLIFERATION                                                     | 62  | -0.47652712 | -1.8013514 | 0           | 0.024480164 |
| REACTOME_HIV_TRANSCRIPTION_ELONGATION                                                                              | 24  | 0.61962694  | 1.7065867  | 0.001547988 | 0.024831422 |
| GO_MONOCARBOXYLIC_ACID_CATABOLIC_PROCESS                                                                           | 89  | 0.4860476   | 1.7060754  | 0.001340483 | 0.02487524  |
| GO_PRERIBOSOME                                                                                                     | 36  | 0.5644962   | 1.7056085  | 0.006042296 | 0.024926612 |
| REACTOME_RRNA_MODIFICATION_IN_THE_NUCLEUS_AND_<br>CYTOSOL                                                          | 32  | 0.5832469   | 1.705275   | 0           | 0.02495753  |
| GO_DEFENSE_RESPONSE_TO_GRAM_POSITIVE_BACTERIUM                                                                     | 41  | -0.5163303  | -1.7963414 | 0           | 0.025126828 |
| WNT_SIGNALING                                                                                                      | 56  | -0.47749168 | -1.7965004 | 0           | 0.025157984 |
| GO_CYCLIC_NUCLEOTIDE_MEDIATED_SIGNALING                                                                            | 112 | -0.43472365 | -1.796764  | 0           | 0.0252068   |
| PID_IL12_STAT4_PATHWAY                                                                                             | 24  | -0.5848556  | -1.7968657 | 0.002702703 | 0.025250496 |
| GO_SLEEP                                                                                                           | 19  | -0.62478167 | -1.7941532 | 0.005050505 | 0.0252603   |
| GO_MEMBRANE_REPOLARIZATION                                                                                         | 28  | -0.56245446 | -1.7929103 | 0.002824859 | 0.02530685  |
| GO_CIS_REGULATORY_REGION_BINDING                                                                                   | 308 | -0.38210228 | -1.7932541 | 0           | 0.025318002 |
| PID_FGF_PATHWAY                                                                                                    | 29  | -0.5722531  | -1.7925208 | 0.002702703 | 0.025326667 |
| GO_MYOTUBE_DIFFERENTIATION                                                                                         | 54  | -0.48659176 | -1.794259  | 0           | 0.025334254 |
| GO_MITOTIC_METAPHASE_PLATE_CONGRESSION                                                                             | 25  | 0.60852253  | 1.7013203  | 0.0048      | 0.025370155 |
| BIOCARTA_IL12_PATHWAY                                                                                              | 16  | -0.6539258  | -1.7943324 | 0.007352941 | 0.025396096 |
| HALLMARK_KRAS_SIGNALING_UP                                                                                         | 152 | -0.40893576 | -1.7946943 | 0           | 0.025414139 |
| GO_MEMBRANE_COAT                                                                                                   | 49  | 0.53127784  | 1.7014025  | 0           | 0.025426969 |
| REACTOME_REGULATION_OF_LIPID_METABOLISM_BY_PPAR<br>ALPHA                                                           | 71  | 0.49465734  | 1.7015527  | 0           | 0.025457386 |
| KEGG_BASAL_TRANSCRIPTION_FACTORS                                                                                   | 21  | 0.6428405   | 1.7019933  | 0           | 0.025504466 |
| REACTOME_BASE_EXCISION_REPAIR                                                                                      | 31  | 0.58214676  | 1.7016898  | 0           | 0.02550775  |
| GO_REGULATION_OF_CHROMOSOME_ORGANIZATION                                                                           | 149 | 0.44808418  | 1.7003522  | 0           | 0.025516534 |
| REACTOME_CARGO_TRAFFICKING_TO_THE_PERICILIARY_ME<br>MBRANE                                                         | 26  | 0.6054993   | 1.7021897  | 0.003169572 | 0.02552347  |
| GO_ENDONUCLEASE_ACTIVITY_ACTIVE_WITH_EITHER_RIBO<br>_OR_DEOXYRIBONUCLEIC_ACIDS_AND_PRODUCING_5_PHO<br>SPHOMOESTERS | 18  | 0.6575456   | 1.7024454  | 0.006557377 | 0.025532663 |
| REACTOME_RESOLUTION_OF_SISTER_CHROMATID_COHESI<br>ON                                                               | 61  | 0.50433844  | 1.7033452  | 0.001449275 | 0.02553295  |
| GO_OSTEOCLAST_DIFFERENTIATION                                                                                      | 54  | -0.49175903 | -1.7887869 | 0           | 0.025545241 |
| GO_REGULATION_OF_MACROPHAGE_ACTIVATION                                                                             | 39  | -0.53070474 | -1.7910821 | 0.008955224 | 0.025549801 |
| GO_TRANSPORTER_COMPLEX                                                                                             | 151 | -0.41467217 | -1.7902611 | 0           | 0.02556866  |
| REACTOME_MITOCHONDRIAL_BIOGENESIS                                                                                  | 43  | 0.5397625   | 1.7026552  | 0.002998501 | 0.025571486 |
| REACTOME_NONHOMOLOGOUS_END_JOINING_NHEJ                                                                            | 19  | 0.6493012   | 1.6999645  | 0.005128205 | 0.025577081 |
| REACTOME_SYNTHESIS_OF_ACTIVE_UBIQUITIN_ROLES_OF_<br>E1_AND_E2_ENZYMES                                              | 19  | 0.6449134   | 1.7004511  | 0.007861636 | 0.025583247 |
| GO_NEGATIVE_REGULATION_OF_STRIATED_MUSCLE_CELL_<br>DIFFERENTIATION                                                 | 20  | -0.63531023 | -1.7895851 | 0           | 0.025593378 |
| GO_ORGAN_OR_TISSUE_SPECIFIC_IMMUNE_RESPONSE                                                                        | 16  | -0.6592298  | -1.7905247 | 0.005012531 | 0.025593488 |
| REACTOME_DNA_REPLICATION_PRE_INITIATION                                                                            | 48  | 0.53524417  | 1.7028266  | 0           | 0.025610719 |
| GO_CARDIAC_VENTRICLE_MORPHOGENESIS                                                                                 | 47  | -0.5057939  | -1.7888055 | 0.002949853 | 0.025623871 |
| GO_LABYRINTHINE_LAYER_BLOOD_VESSEL_DEVELOPMENT                                                                     | 15  | -0.6557767  | -1.7889212 | 0.00486618  | 0.025696697 |
| GO_ALPHA_AMINO_ACID_CATABOLIC_PROCESS                                                                              | 72  | 0.49953505  | 1.6993531  | 0           | 0.02570164  |
| GO_NADP_METABOLIC_PROCESS                                                                                          | 23  | 0.625165    | 1.6984032  | 0.004731861 | 0.025880065 |

|                                                             |     |             |            |             |             |
|-------------------------------------------------------------|-----|-------------|------------|-------------|-------------|
| KEGG_CITRATE_CYCLE_TCA_CYCLE                                | 26  | 0.59227717  | 1.6974185  | 0.001592357 | 0.026104094 |
| GO_PEPTIDE_BIOSYNTHETIC_PROCESS                             | 306 | 0.42346632  | 1.6968807  | 0           | 0.026178177 |
| GO_CARDIAC_MUSCLE_TISSUE_MORPHOGENESIS                      | 38  | -0.528224   | -1.7856039 | 0           | 0.026191944 |
| GO_NEGATIVE_REGULATION_OF_AXON_EXTENSION                    | 21  | -0.59283423 | -1.7852907 | 0.002604167 | 0.026212791 |
| GO_SARCOMERE_ORGANIZATION                                   | 21  | -0.612252   | -1.7856252 | 0           | 0.026260119 |
| KEGG_DILATED_CARDIOMYOPATHY                                 | 59  | -0.47396046 | -1.7856382 | 0           | 0.026352584 |
| GO_POSITIVE_REGULATION_OF_VIRAL_PROCESS                     | 60  | 0.5120428   | 1.6959709  | 0           | 0.02636525  |
| GO_PML_BODY                                                 | 51  | 0.5182684   | 1.6943252  | 0.001490313 | 0.026512323 |
| REACTOME_AUF1_HNRNP_D0_BINDS_AND_DESTABILIZES_MRNA          | 29  | 0.5910248   | 1.6948447  | 0.004846527 | 0.026526738 |
| GO_SERINE_FAMILY_AMINO_ACID_METABOLIC_PROCESS               | 26  | 0.59421057  | 1.6944904  | 0.003164557 | 0.026549853 |
| REACTOME_METABOLISM_OF_POLYAMINES                           | 36  | 0.565687    | 1.6950859  | 0.004658385 | 0.02656446  |
| GO_POSITIVE_REGULATION_OF_VIRAL_GENOME_REPLICATION          | 17  | 0.661138    | 1.6936713  | 0.008196721 | 0.026628086 |
| REACTOME_METABOLISM_OF_AMINO_ACIDS_AND_DERIVATIVES          | 215 | 0.43196058  | 1.693379   | 0           | 0.026629834 |
| GO_4_IRON_4_SULFUR_CLUSTER_BINDING                          | 30  | 0.5776285   | 1.6929164  | 0.004636785 | 0.026665967 |
| GO_ACETYLTRANSFERASE_ACTIVITY                               | 56  | 0.5174341   | 1.6922348  | 0.007183908 | 0.02668524  |
| GO_POSITIVE_REGULATION_OF_MYELOID_LEUKOCYTE_DIFFERENTIATION | 33  | -0.5440642  | -1.7827232 | 0.002717391 | 0.026685532 |
| GO_ORGANELLE_ENVELOPE_LUMEN                                 | 57  | 0.5152689   | 1.6924936  | 0.002735978 | 0.026690438 |
| GO_AP_TYPE_MEMBRANE_COAT_ADAPTOR_COMPLEX                    | 17  | 0.65865505  | 1.6917593  | 0.006655574 | 0.026722968 |
| REACTOME_MITOTIC_PROPHASE                                   | 47  | 0.52931345  | 1.6912771  | 0.004366812 | 0.026781132 |
| GO_RESPONSE_TO_MORPHINE                                     | 19  | -0.628484   | -1.7816666 | 0.007712083 | 0.026823966 |
| GO_REGULATION_OF_CELL_ACTIVATION                            | 360 | -0.37123093 | -1.7817888 | 0           | 0.026881235 |
| REACTOME_PLASMA_LIPOPROTEIN_ASSEMBLY                        | 15  | 0.68189216  | 1.6904244  | 0.01141925  | 0.026946934 |
| GO_REGULATION_OF_HORMONE_METABOLIC_PROCESS                  | 27  | -0.5710483  | -1.77948   | 0.005602241 | 0.027191792 |
| GO_NEGATIVE_REGULATION_OF_CELL_ACTIVATION                   | 134 | -0.41665128 | -1.7800263 | 0           | 0.027231626 |
| GO_POSITIVE_REGULATION_OF_VASCULATURE_DEVELOPMENT           | 127 | -0.41744694 | -1.7796222 | 0           | 0.027243607 |
| GO_UBIQUITIN_LIKE_PROTEIN_LIGASE_ACTIVITY                   | 92  | 0.48082653  | 1.6887623  | 0           | 0.027411025 |
| GO_CELLULAR_PROTEIN_CATABOLIC_PROCESS                       | 388 | 0.41188857  | 1.6882379  | 0           | 0.027452927 |
| GO_CONDENSED_CHROMOSOME_CENTROMERIC_REGION                  | 53  | 0.51847804  | 1.687706   | 0           | 0.027525676 |
| GO_CILIARY_BASAL_BODY                                       | 42  | 0.5364541   | 1.6855905  | 0.00141844  | 0.027879667 |
| GO_POSITIVE_REGULATION_OF_TELOMERE_MAINTENANCE              | 25  | 0.59776485  | 1.6864042  | 0.00913242  | 0.027887253 |
| GO_NEGATIVE_REGULATION_OF_TRANSFERASE_ACTIVITY              | 157 | -0.40496832 | -1.7755843 | 0           | 0.027910292 |
| REACTOME_MITOTIC_PROMETAPHASE                               | 98  | 0.4712176   | 1.6857357  | 0           | 0.02792647  |
| GO_VASCULAR_ENDOTHELIAL_GROWTH_FACTOR_PRODUCT               | 20  | -0.61019206 | -1.7760358 | 0.002762431 | 0.027948173 |
| GO_COLLAGEN_METABOLIC_PROCESS                               | 67  | -0.46697468 | -1.7757034 | 0           | 0.027952598 |
| GO_NEGATIVE_REGULATION_OF_CELL_GROWTH                       | 111 | -0.42839    | -1.7749561 | 0           | 0.027956929 |
| KEGG_GLYCINE_SERINE_AND_THREONINE_METABOLISM                | 24  | 0.6151656   | 1.6858877  | 0.004731861 | 0.0279625   |
| GO_REGULATION_OF_BONE_REMODELING                            | 29  | -0.56220794 | -1.7761179 | 0.002840909 | 0.028002597 |
| GO_T_CELL_DIFFERENTIATION                                   | 146 | -0.4031172  | -1.7742544 | 0           | 0.028010622 |
| PID_P53_DOWNSTREAM_PATHWAY                                  | 92  | -0.43976605 | -1.7750857 | 0           | 0.028010758 |
| GO_VESICLE_ORGANIZATION                                     | 175 | 0.44235992  | 1.6846765  | 0           | 0.028062005 |
| GO_PERK_MEDIATED_UNFOLDED_PROTEIN_RESPONSE                  | 16  | -0.65363824 | -1.773637  | 0.005102041 | 0.02807119  |
| GO_POSITIVE_REGULATION_OF_ORGAN_GROWTH                      | 33  | -0.5309551  | -1.7714753 | 0           | 0.028576117 |

|                                                                                     |     |             |            |             |             |
|-------------------------------------------------------------------------------------|-----|-------------|------------|-------------|-------------|
| GO_CHEMOKINE_ACTIVITY                                                               | 32  | -0.54090834 | -1.7710785 | 0.005509642 | 0.028616779 |
| GO_NEGATIVE_REGULATION_OF_LYMPHOCYTE_DIFFERENTIATION                                | 36  | -0.5227331  | -1.7689929 | 0.005970149 | 0.028959565 |
| GO_REGULATION_OF_KIDNEY_DEVELOPMENT                                                 | 41  | -0.5175068  | -1.7693669 | 0.003076923 | 0.028965402 |
| BIOCARTA_NFKB_PATHWAY                                                               | 15  | -0.6555387  | -1.7675747 | 0.013157895 | 0.029204566 |
| GO_C21_STEROID_HORMONE_BIOSYNTHETIC_PROCESS                                         | 19  | -0.6095283  | -1.7676563 | 0.008108108 | 0.029255437 |
| GO_REGULATION_OF_ALPHA_BETA_T_CELL_ACTIVATION                                       | 58  | -0.48236218 | -1.7679447 | 0.006514658 | 0.029256182 |
| GO_DENDRITE_MEMBRANE                                                                | 22  | -0.58932865 | -1.7663352 | 0.005571031 | 0.029490123 |
| GO_CARDIOVASCULAR_SYSTEM_DEVELOPMENT                                                | 465 | -0.35557577 | -1.7655089 | 0           | 0.029536353 |
| GO_LEUKOCYTE_DIFFERENTIATION                                                        | 305 | -0.37388182 | -1.7656604 | 0           | 0.029582871 |
| GO_NEGATIVE_REGULATION_OF_SMOOTH_MUSCLE_CELL_MIGRATION                              | 16  | -0.6387959  | -1.7647889 | 0.004987531 | 0.029622365 |
| GO_PITUITARY_GLAND_DEVELOPMENT                                                      | 22  | -0.58390665 | -1.7633216 | 0.002785515 | 0.029840246 |
| GO_RESPONSE_TO_MOLECULE_OF_BACTERIAL_ORIGIN                                         | 221 | -0.38603643 | -1.763624  | 0           | 0.02984327  |
| GO_ANTIGEN_PROCESSING_AND_PRESENTATION_OF_EXOGENOUS_PEPTIDE_ANTIGEN_VIA_MHC_CLASS_I | 50  | 0.52725446  | 1.6789153  | 0.00143472  | 0.029896405 |
| GO_T_HELPER_1_TYPE_IMMUNE_RESPONSE                                                  | 25  | -0.5645089  | -1.7617337 | 0.002638523 | 0.029921882 |
| GO_MEDIATOR_COMPLEX                                                                 | 16  | 0.6719817   | 1.6778175  | 0.006472492 | 0.029944796 |
| GO_CYTOKINE_METABOLIC_PROCESS                                                       | 72  | -0.45678592 | -1.7622155 | 0           | 0.029965607 |
| GO_CARDIAC_MUSCLE_CONTRACTION                                                       | 85  | -0.4400263  | -1.7613027 | 0           | 0.029972803 |
| GO_PEPTIDE_METABOLIC_PROCESS                                                        | 400 | 0.40905097  | 1.677944   | 0           | 0.029986354 |
| GO_MORPHOGENESIS_OF_A_BRANCHING_STRUCTURE                                           | 116 | -0.4177339  | -1.7617762 | 0           | 0.03        |
| GO_COLLAGEN_TRIMER                                                                  | 42  | -0.5032165  | -1.762402  | 0.003164557 | 0.03000709  |
| GO_REGULATION_OF_MYELOID_LEUKOCYTE_DIFFERENTIATION                                  | 70  | -0.47103545 | -1.7627108 | 0           | 0.030010158 |
| GO_RESPONSE_TO_BMP                                                                  | 89  | -0.44030973 | -1.7606487 | 0           | 0.030038683 |
| GO_SECOND_MESSENGER_MEDIATED_SIGNALING                                              | 244 | -0.38218334 | -1.7597588 | 0           | 0.030074282 |
| GO_MATURATION_OF_SSU_RRNA                                                           | 22  | 0.61784464  | 1.6779442  | 0.008250825 | 0.030082772 |
| REACTOME_G2_M_CHECKPOINTS                                                           | 72  | 0.4915988   | 1.6780516  | 0           | 0.03015147  |
| GO_REGULATION_OF_MUSCLE_ORGAN_DEVELOPMENT                                           | 72  | -0.44780296 | -1.7598088 | 0.003424658 | 0.03016241  |
| GO_POSITIVE_REGULATION_OF_FIBROBLAST_PROLIFERATION                                  | 35  | -0.5390175  | -1.7586403 | 0.003095975 | 0.030280277 |
| GO_MOLTING_CYCLE                                                                    | 49  | -0.49392253 | -1.7575315 | 0           | 0.03029523  |
| GO_RENAL_FILTRATION                                                                 | 19  | -0.6201755  | -1.7576553 | 0.015228426 | 0.030356703 |
| GO_VOLTAGE_GATED_ION_CHANNEL_ACTIVITY                                               | 84  | -0.43895695 | -1.7579602 | 0           | 0.030392766 |
| GO_FATTY_ACID_BETA_OXIDATION                                                        | 54  | 0.5168463   | 1.6744368  | 0.002902758 | 0.03050376  |
| GO_GLYCOSIDE_METABOLIC_PROCESS                                                      | 15  | 0.6768792   | 1.6755811  | 0.00990099  | 0.03055569  |
| REACTOME_MITOCHONDRIAL_PROTEIN_IMPORT                                               | 31  | 0.57289016  | 1.6758617  | 0.004601227 | 0.030564379 |
| GO_FATTY_ACID_CATABOLIC_PROCESS                                                     | 73  | 0.48874378  | 1.6744772  | 0.001414427 | 0.03059511  |
| GO_PROTEASOMAL_PROTEIN_CATABOLIC_PROCESS                                            | 239 | 0.42396462  | 1.6745126  | 0           | 0.030674249 |
| GO_NEUTROPHIL_MIGRATION                                                             | 75  | -0.4542426  | -1.7558483 | 0           | 0.030718217 |
| GO_NADH_DEHYDROGENASE_COMPLEX_ASSEMBLY                                              | 31  | 0.5712025   | 1.674607   | 0.001519757 | 0.03073473  |
| GO_REGULATION_OF_TRANSLATIONAL_INITIATION                                           | 43  | 0.53928065  | 1.674795   | 0.007407407 | 0.030743904 |
| GO_DOUBLE_STRAND_BREAK_REPAIR                                                       | 87  | 0.48159993  | 1.6733247  | 0.002666667 | 0.030759282 |
| GO_VESICLE_MEDIATED_TRANSPORT_BETWEEN_ENDOSOMAL_COMPARTMENTS                        | 26  | 0.5897212   | 1.6728303  | 0.007824726 | 0.030830257 |
| GO_BONE_MORPHOGENESIS                                                               | 66  | -0.4528096  | -1.7547951 | 0           | 0.030847425 |
| GO_MEMORY                                                                           | 73  | -0.44716316 | -1.7537597 | 0           | 0.030866463 |
| GO_NEGATIVE_REGULATION_OF_PHOSPHORYLATION                                           | 267 | -0.37877542 | -1.7535363 | 0           | 0.03087127  |
| GO_PROTEIN_SERINE_THREONINE_KINASE_INHIBITOR_ACTIVITY                               | 16  | -0.64215237 | -1.7550473 | 0.012886598 | 0.030873127 |
| GO_RENAL_SYSTEM_DEVELOPMENT                                                         | 192 | -0.39710936 | -1.7539439 | 0           | 0.030923529 |

|                                                                                 |     |             |            |             |             |
|---------------------------------------------------------------------------------|-----|-------------|------------|-------------|-------------|
| GO_DETECTION_OF_STIMULUS_INVOLVED_IN_SENSORY_PERCEPTION                         | 56  | -0.48023733 | -1.7541184 | 0           | 0.030945096 |
| GO_SMOOTH_MUSCLE_CONTRACTION                                                    | 67  | -0.4585582  | -1.7527465 | 0           | 0.03100385  |
| GO_G_PROTEIN_COUPLED_PURINERGIC_RECEPTOR_SIGNALING_PATHWAY                      | 15  | -0.6536939  | -1.7516528 | 0.004950495 | 0.03106785  |
| GO_SENSORY_PERCEPTION_OF_LIGHT_STIMULUS                                         | 93  | -0.43470398 | -1.7519467 | 0           | 0.031068763 |
| GO_NUCLEOCYTOPLASMIC_CARRIER_ACTIVITY                                           | 15  | 0.67641145  | 1.6717621  | 0.006745363 | 0.031108087 |
| GO_KIDNEY_MORPHOGENESIS                                                         | 57  | -0.4797531  | -1.752044  | 0           | 0.031125091 |
| GO TRABECULA FORMATION                                                          | 18  | -0.6147793  | -1.7507399 | 0.01010101  | 0.0311866   |
| GO_RESPONSE_TO_ANESTHETIC                                                       | 43  | -0.499221   | -1.7510076 | 0.002994012 | 0.031222926 |
| GO_CIRCULATORY_SYSTEM_PROCESS                                                   | 338 | -0.37081394 | -1.7500349 | 0           | 0.031310078 |
| PID_REG_GR_PATHWAY                                                              | 51  | -0.4870587  | -1.7484723 | 0.003215434 | 0.031519786 |
| GO_RESPONSE_TO_BACTERIUM                                                        | 367 | -0.365264   | -1.7486695 | 0           | 0.031552453 |
| REACTOME_RRNA_PROCESSING                                                        | 90  | 0.46818307  | 1.6696124  | 0.002628121 | 0.031646397 |
| GO_AZUROPHIL_GRANULE_LUMEN                                                      | 62  | 0.5063927   | 1.6696389  | 0.00141844  | 0.031739876 |
| GO_HEART_PROCESS                                                                | 170 | -0.40056807 | -1.7472305 | 0           | 0.03183508  |
| REACTOME_S_PHASE                                                                | 87  | 0.47733408  | 1.6680282  | 0           | 0.032127045 |
| GO_MEMBRANE_DOCKING                                                             | 89  | 0.4666947   | 1.6673409  | 0           | 0.0322632   |
| GO_GUANOSINE_CONTAINING_COMPOUND_METABOLIC_PROCESS                              | 23  | 0.60504     | 1.666644   | 0.006441224 | 0.032392517 |
| GO_REGULATION_OF_LEUKOCYTE_MIGRATION                                            | 135 | -0.40508777 | -1.7427981 | 0           | 0.032439493 |
| GO_ASTROCYTE_DEVELOPMENT                                                        | 24  | -0.56323075 | -1.7442468 | 0.002857143 | 0.03247494  |
| REACTOME_ECM_PROTEOGLYCANS                                                      | 50  | -0.47999257 | -1.7440274 | 0           | 0.03248934  |
| GO_NEURON_RECOGNITION                                                           | 25  | -0.5541648  | -1.7428203 | 0.005277045 | 0.03252719  |
| GO_NEGATIVE_REGULATION_OF_TUMOR_NECROSIS_FACTOR_SUPERFAMILY_CYTOKINE_PRODUCTION | 36  | -0.53976417 | -1.7443633 | 0.005934718 | 0.032529287 |
| GO_PRI_MIRNA_TRANSCRIPTION_BY_RNA_POLYMERASE_II                                 | 28  | -0.55279505 | -1.7430238 | 0.008219178 | 0.03254704  |
| GO_POSITIVE_REGULATION_OF_FAT_CELL_DIFFERENTIATION                              | 32  | -0.5337456  | -1.7430897 | 0.00591716  | 0.032605678 |
| GO_FAT_CELL_DIFFERENTIATION                                                     | 121 | -0.41055933 | -1.743288  | 0           | 0.032645397 |
| SIG_CD40PATHWAYMAP                                                              | 22  | -0.5725623  | -1.7414746 | 0.00802139  | 0.03276378  |
| GO_DNA_METABOLIC_PROCESS                                                        | 405 | 0.40326053  | 1.6651647  | 0           | 0.03286281  |
| GO_EPITHELIAL_CELL_APOPTOTIC_PROCESS                                            | 64  | -0.45161965 | -1.7390356 | 0           | 0.03335047  |
| REACTOME_INTERLEUKIN_10_SIGNALING                                               | 35  | -0.54620475 | -1.7391528 | 0.005714286 | 0.033405893 |
| GO_RESPONSE_TO_CAMP                                                             | 69  | -0.4585644  | -1.7382705 | 0           | 0.033539023 |
| PID_IL12_2PATHWAY                                                               | 44  | -0.4944826  | -1.7372576 | 0.002881844 | 0.033822622 |
| GO_MITOTIC_SISTER_CHROMATID_SEGREGATION                                         | 64  | 0.4983752   | 1.6618831  | 0.004178273 | 0.033933464 |
| REACTOME_SUMOYLATION_OF_DNA_DAMAGE_RESPONSE_AND_REPAIR_PROTEINS                 | 41  | 0.5442355   | 1.6615505  | 0.007541478 | 0.033957843 |
| GO_REGULATION_OF_PROTEIN_SERINE_THREONINE_KINASE_ACTIVITY                       | 295 | -0.36779857 | -1.7364181 | 0           | 0.034019828 |
| GO_ORGAN_GROWTH                                                                 | 109 | -0.4189833  | -1.7350348 | 0           | 0.03433338  |
| GO_REGULATION_OF_BICELLULAR_TIGHT_JUNCTION_ASSEMBLY                             | 16  | -0.6229915  | -1.7346859 | 0.012690355 | 0.03433791  |
| GO_REGULATION_OF_ALPHA_BETA_T_CELL_DIFFERENTIATION                              | 40  | -0.5049582  | -1.7335781 | 0           | 0.034610845 |
| GO_ENTEROENDOCRINE_CELL_DIFFERENTIATION                                         | 15  | -0.63641626 | -1.7320964 | 0.005       | 0.03502888  |
| GO_NEGATIVE_REGULATION_OF_CYTOKINE_BIOSYNTHETIC_PROCESS                         | 20  | -0.58978933 | -1.7315772 | 0.010723861 | 0.03509294  |
| GO_RIBONUCLEOPROTEIN_COMPLEX_SUBUNIT_ORGANIZATION                               | 87  | 0.47727302  | 1.6580384  | 0.002670227 | 0.03529794  |

|                                                                                     |     |             |            |             |             |
|-------------------------------------------------------------------------------------|-----|-------------|------------|-------------|-------------|
| GO_NEGATIVE_REGULATION_OF_GENE_EXPRESSION_EPIGENETIC                                | 34  | 0.56166995  | 1.6569378  | 0.004573171 | 0.035508763 |
| GO_UBIQUITIN_LIKE_PROTEIN_CONJUGATING_ENZYME_ACTIVITY                               | 24  | 0.5873507   | 1.6570711  | 0.012882448 | 0.03556648  |
| GO_PROTEIN_N_LINKED_GLYCOSYLATION                                                   | 51  | 0.5146225   | 1.6562337  | 0.002919708 | 0.035567794 |
| REACTOME_NEDDYLIATION                                                               | 104 | 0.4600334   | 1.6562383  | 0.004       | 0.035673965 |
| KEGG_INTESTINAL_IMMUNE_NETWORK_FOR_IGA_PRODUCTION                                   | 26  | -0.5595598  | -1.7290797 | 0.005617978 | 0.035690654 |
| REACTOME_DNA_DAMAGE_BYPASS                                                          | 28  | 0.57940567  | 1.6548383  | 0.007633588 | 0.0357311   |
| REACTOME_AMINE_LIGAND_BINDING_RECEPTORS                                             | 20  | -0.6121406  | -1.7291155 | 0.007894737 | 0.035788435 |
| GO_SEMI_LUNAR_VALVE_DEVELOPMENT                                                     | 25  | -0.5629354  | -1.7294115 | 0           | 0.035792895 |
| REACTOME_METABOLISM_OF_COFACTORS                                                    | 15  | 0.6598722   | 1.6549028  | 0.009966778 | 0.035812553 |
| REACTOME_TELOMERE_MAINTENANCE                                                       | 26  | 0.58298635  | 1.6551273  | 0.008090615 | 0.03581821  |
| GO_PROTEIN_TARGETING                                                                | 219 | 0.42377824  | 1.6551858  | 0.001179245 | 0.035890426 |
| GO_MANGANESE_ION_BINDING                                                            | 38  | 0.5334284   | 1.6538124  | 0.007716049 | 0.036020365 |
| GO_CELLULAR_COMPONENT_ASSEMBLY_INVOLVED_IN_MORPHOGENESIS                            | 57  | -0.47145438 | -1.727248  | 0           | 0.036120582 |
| GO_ORGANELLE_MEMBRANE_FUSION                                                        | 49  | 0.51030856  | 1.6525397  | 0.004366812 | 0.036161184 |
| GO_TRANSFERASE_ACTIVITY_TRANSFERRING_ACYL_GROUPS                                    | 118 | 0.4486472   | 1.6530352  | 0           | 0.036208477 |
| GO_MITOCHONDRIAL_LARGE_RIBOSOMAL_SUBUNIT                                            | 29  | 0.57290787  | 1.652614   | 0.009448819 | 0.036242947 |
| REACTOME_CHROMOSOME_MAINTENANCE                                                     | 38  | 0.54341406  | 1.650435   | 0.005970149 | 0.036302812 |
| REACTOME_UCH_PROTEINASES                                                            | 40  | 0.5341103   | 1.6506654  | 0.001470588 | 0.03632741  |
| REACTOME ASPARAGINE_N_LINKED_GLYCOSYLATION                                          | 199 | 0.4252523   | 1.6516621  | 0           | 0.03632815  |
| REACTOME_NUCLEAR_ENVELOPE_NE_REASSEMBLY                                             | 50  | 0.51156485  | 1.6500198  | 0.00443787  | 0.03635972  |
| REACTOME_NEGATIVE_EPIGENETIC_REGULATION_OF_RRNA_EXPRESSION                          | 29  | 0.5583069   | 1.6507515  | 0.010920437 | 0.036396537 |
| REACTOME_RNA_POLYMERASE_III_TRANSCRIPTION                                           | 22  | 0.6059822   | 1.6517017  | 0.0208      | 0.03641774  |
| GO_QUINONE_METABOLIC_PROCESS                                                        | 23  | 0.59624076  | 1.6511239  | 0.004807693 | 0.036436267 |
| REACTOME_RUNX1_REGULATES_TRANSCRIPTION_OF_GENES_INVOLVED_IN_DIFFERENTIATION_OF_HSCS | 39  | 0.53789914  | 1.650828   | 0.007692308 | 0.03646605  |
| GO_NEGATIVE_REGULATION_OF_LEUKOCYTE_CELL_CELL_ADHESION                              | 77  | -0.44697788 | -1.7238559 | 0.003802281 | 0.03651708  |
| GO_PANCREAS_DEVELOPMENT                                                             | 42  | -0.4922214  | -1.7258773 | 0           | 0.036524337 |
| GO_REGULATION_OF_LEUKOCYTE_CHEMOTAXIS                                               | 79  | -0.43387136 | -1.7231135 | 0           | 0.036524486 |
| GO_POTASSIUM_CHANNEL_ACTIVITY                                                       | 51  | -0.4756045  | -1.7241064 | 0           | 0.036527604 |
| GO_GLANDULAR_EPITHELIAL_CELL_DIFFERENTIATION                                        | 24  | -0.55872196 | -1.7231636 | 0.008219178 | 0.036581066 |
| GO_INTERLEUKIN_4_PRODUCTION                                                         | 21  | -0.5794388  | -1.7226287 | 0.016393442 | 0.03659454  |
| GO_NEPHRON_MORPHOGENESIS                                                            | 46  | -0.48148817 | -1.7244056 | 0           | 0.036595732 |
| GO_CELL_SUBSTRATE_ADHESION                                                          | 208 | -0.38502866 | -1.7241174 | 0           | 0.03662553  |
| GO_CHONDROITIN_SULFATE_BIOSYNTHETIC_PROCESS                                         | 16  | -0.62485456 | -1.7232939 | 0.002450981 | 0.0366511   |
| GO_BASEMENT_MEMBRANE                                                                | 55  | -0.4685168  | -1.7244879 | 0.006779661 | 0.036653187 |
| REACTOME_NUCLEAR_ENVELOPE_BREAKDOWN                                                 | 36  | 0.55797815  | 1.6487024  | 0.010719755 | 0.036653742 |
| GO_CHONDROITIN_SULFATE_PROTEOGLYCAN_BIOSYNTHETIC_PROCESS                            | 18  | -0.6098977  | -1.725111  | 0.01058201  | 0.036656864 |
| GO_SPLICEOSOMAL_TRISNRNP_COMPLEX                                                    | 19  | 0.6227202   | 1.6489797  | 0.011784512 | 0.03665953  |
| PID_MAPK_TRK_PATHWAY                                                                | 21  | -0.57001966 | -1.7246909 | 0.0025      | 0.03669228  |
| GO_CELLULAR_PROTEIN_COMPLEX_DISASSEMBLY                                             | 116 | 0.45332843  | 1.6480985  | 0.001321004 | 0.03670284  |
| GO_INTRACELLULAR_PROTEIN_TRANSMEMBRANE_TRANSPORT                                    | 25  | 0.59414005  | 1.6483268  | 0.011217949 | 0.036708925 |
| GO_VACUOLAR_MEMBRANE                                                                | 234 | 0.41724473  | 1.6476147  | 0           | 0.03680121  |
| GO_ORGANELLE_INNER_MEMBRANE                                                         | 250 | 0.4175828   | 1.6472995  | 0           | 0.03683462  |

|                                                                         |     |             |            |             |             |
|-------------------------------------------------------------------------|-----|-------------|------------|-------------|-------------|
| GO_MYELOID_LEUKOCYTE_MIGRATION                                          | 131 | -0.40559906 | -1.7215515 | 0           | 0.036838822 |
| GO_REGULATION_OF_MUSCLE_SYSTEM_PROCESS                                  | 152 | -0.3962365  | -1.7204381 | 0           | 0.036963314 |
| GO_CCR_CHEMOKINE_RECEPTOR_BINDING                                       | 24  | -0.5680323  | -1.7207464 | 0.01396648  | 0.036970917 |
| GO_POSITIVE_REGULATION_OF_MAPK_CASCADE                                  | 297 | -0.36570957 | -1.7200342 | 0           | 0.036996327 |
| GO_REGULATION_OF_HEART_MORPHOGENESIS                                    | 24  | -0.56889194 | -1.7185723 | 0.01591512  | 0.03728948  |
| GO_LYMPHOCYTE_ACTIVATION                                                | 410 | -0.3543713  | -1.7182013 | 0           | 0.037294623 |
| GO_COLUMNAR_CUBOIDAL_EPITHELIAL_CELL_DIFFERENTIATION                    | 60  | -0.46169704 | -1.7178184 | 0           | 0.037295256 |
| GO_REGULATION_OF_ANIMAL_ORGAN_FORMATION                                 | 25  | -0.57145107 | -1.7187071 | 0           | 0.037306927 |
| GO_CHONDROCYTE_DIFFERENTIATION                                          | 63  | -0.45931417 | -1.716579  | 0.003236246 | 0.03756365  |
| GO_INTRACILIARY_TRANSPORT_INVOLVED_IN_CILIUM_ASSEMBLY                   | 22  | 0.6056719   | 1.6451023  | 0.014516129 | 0.037596088 |
| GO_INFLAMMATORY_RESPONSE                                                | 447 | -0.35529944 | -1.7161107 | 0           | 0.037682038 |
| GO_POSITIVE_CHEMOTAXIS                                                  | 38  | -0.49711978 | -1.7150455 | 0           | 0.037846692 |
| GO_CARDIAC_CONDUCTION                                                   | 83  | -0.43387127 | -1.7153053 | 0           | 0.03784765  |
| GO_RNA_CATABOLIC_PROCESS                                                | 183 | 0.42564896  | 1.6437018  | 0           | 0.038043004 |
| GO_HEAD_MORPHOGENESIS                                                   | 19  | -0.6098493  | -1.7138602 | 0.015503876 | 0.038044844 |
| GO_MESENCHYMAL_CELL_DIFFERENTIATION                                     | 112 | -0.41316143 | -1.7141384 | 0           | 0.038085118 |
| GO_RIBONUCLEOPROTEIN_COMPLEX_BINDING                                    | 76  | 0.4858884   | 1.64381    | 0.002754821 | 0.038103454 |
| REACTOME_SMOOTH_MUSCLE_CONTRACTION                                      | 30  | -0.53979945 | -1.7130711 | 0.008174387 | 0.038186617 |
| GO_LIGASE_ACTIVITY_FORMING_CARBON_SULFUR_BONDS                          | 25  | 0.59137684  | 1.6425397  | 0.00952381  | 0.03822682  |
| GO_NUCLEOSIDE_MONOPHOSPHATE_METABOLIC_PROCESS                           | 44  | 0.5232402   | 1.6422558  | 0.004360465 | 0.03824087  |
| GO_OXIDOREDUCTASE_ACTIVITY                                              | 455 | 0.39617926  | 1.642727   | 0           | 0.038244344 |
| GO_POSITIVE_REGULATION_OF_VASCULAR_ENDOTHELIAL_GROWTH_FACTOR_PRODUCTION | 16  | -0.6323935  | -1.7125219 | 0.01        | 0.038253203 |
| REACTOME_PROCESSING_OF_DNA_DOUBLE_STRAND_BREAK_ENDS                     | 31  | 0.5531371   | 1.6429216  | 0.013392857 | 0.038273364 |
| GO_SENSORY_PERCEPTION_OF_TASTE                                          | 24  | -0.56796354 | -1.7119699 | 0.007978723 | 0.03834193  |
| GO_POSITIVE_REGULATION_OF_MAP_KINASE_ACTIVITY                           | 149 | -0.3928335  | -1.7106222 | 0           | 0.03868303  |
| REACTOME_DEGRADATION_OF_DVL                                             | 32  | 0.5578569   | 1.6408176  | 0.010606061 | 0.038715802 |
| GO_CHROMOSOME_ORGANIZATION_INVOLVED_IN_MEIOTIC_CELL_CYCLE               | 20  | 0.6147816   | 1.640378   | 0.014950166 | 0.03878959  |
| HALLMARK_E2F_TARGETS                                                    | 134 | 0.44227746  | 1.6399761  | 0           | 0.038864706 |
| GO_SNRNA_TRANSCRIPTION                                                  | 36  | 0.54343146  | 1.6394002  | 0.009463723 | 0.0390108   |
| GO_MYOBLAST_FUSION                                                      | 24  | -0.57257783 | -1.7090374 | 0.007894737 | 0.039104592 |
| GO_RESPIRATORY_SYSTEM_DEVELOPMENT                                       | 122 | -0.3993058  | -1.7091382 | 0           | 0.039177164 |
| GO_NUCLEIC_ACID_PHOSPHODIESTER_BOND_HYDROLYSIS                          | 133 | 0.44335946  | 1.6380949  | 0.001267427 | 0.039448947 |
| GO_PEPTIDYL_ASPARAGINE_MODIFICATION                                     | 24  | 0.5816216   | 1.6378071  | 0.009661836 | 0.039455645 |
| GO_MESODERM_MORPHOGENESIS                                               | 38  | -0.50111896 | -1.7074374 | 0.005988024 | 0.039510384 |
| GO_NEGATIVE_REGULATION_OF_HEMOPOIESIS                                   | 91  | -0.4306432  | -1.7068424 | 0           | 0.03960018  |
| GO_NEGATIVE_REGULATION_OF_GROWTH                                        | 147 | -0.3911918  | -1.7066274 | 0           | 0.039616    |
| REACTOME_TOLL_LIKE_RECEPTOR_10_TLR10_CASCADE                            | 39  | -0.4903329  | -1.7058451 | 0.003367003 | 0.039794665 |
| GO_NUCLEAR_ENVELOPE                                                     | 256 | 0.40986925  | 1.636619   | 0           | 0.039859854 |
| REACTOME_NR1H2_AND_NR1H3_MEDIATED_SIGNALING                             | 25  | 0.5856071   | 1.6359246  | 0.009771987 | 0.039947852 |
| GO_T_CELL_ACTIVATION                                                    | 290 | -0.3698367  | -1.7050588 | 0           | 0.039967105 |
| KEGG_VASCULAR_SMOOTH_MUSCLE_CONTRACTION                                 | 72  | -0.43768835 | -1.7047213 | 0           | 0.04000418  |
| KEGG_BUTANOATE_METABOLISM                                               | 29  | 0.566587    | 1.6360013  | 0.009569378 | 0.040020414 |
| GO_BASAL_TRANSCRIPTION_MACHINERY_BINDING                                | 32  | 0.54595715  | 1.635287   | 0.006279435 | 0.040128622 |
| REACTOME_METABOLISM_OF_NUCLEOTIDES                                      | 67  | 0.48767215  | 1.6347169  | 0.002820875 | 0.040142138 |

|                                                                           |     |             |            |             |             |
|---------------------------------------------------------------------------|-----|-------------|------------|-------------|-------------|
| REACTOME_EXTENSION_OF_TELOMERES                                           | 26  | 0.58298635  | 1.6347647  | 0.006578947 | 0.0402327   |
| GO_NEGATIVE_REGULATION_OF_DEVELOPMENTAL_GROWTH                            | 61  | -0.45859134 | -1.7021245 | 0           | 0.040371347 |
| GO_RIBOSOME_BINDING                                                       | 31  | 0.5546329   | 1.632818   | 0.012288787 | 0.040412486 |
| GO_REGULATION_OF_MEMBRANE_REPOLARIZATION                                  | 21  | -0.58550787 | -1.7016048 | 0.012919896 | 0.040456507 |
| REACTOME_COMPLEX_I_BIOGENESIS                                             | 30  | 0.56390494  | 1.633764   | 0.012658228 | 0.040467978 |
| GO_REGULATION_OF_INTERLEUKIN_4_PRODUCTION                                 | 18  | -0.62178004 | -1.7021346 | 0.012690355 | 0.040470053 |
| GO_CELL_JUNCTION_ASSEMBLY                                                 | 155 | -0.3880258  | -1.702502  | 0           | 0.040473435 |
| GO_SKELETAL_SYSTEM_MORPHOGENESIS                                          | 135 | -0.3955634  | -1.7030237 | 0           | 0.040478833 |
| GO_NON_MOTILE_CILIUM_ASSEMBLY                                             | 21  | 0.5997823   | 1.6328603  | 0.004830918 | 0.040495157 |
| GO_POSITIVE_REGULATION_OF_CD4_POSITIVE_ALPHA_BETA_T_CELL_ACTIVATION       | 26  | -0.539736   | -1.702602  | 0.005464481 | 0.040530432 |
| PID_ERBB1_RECEPTOR_PROXIMAL_PATHWAY                                       | 24  | 0.57687443  | 1.6329135  | 0.0192      | 0.04057468  |
| GO_INNER_MITOCHONDRIAL_MEMBRANE_PROTEIN_COMPLEX                           | 51  | 0.51332086  | 1.633102   | 0.001477105 | 0.040583167 |
| GO_RNA_3_END_PROCESSING                                                   | 67  | 0.49066547  | 1.6332628  | 0.005617978 | 0.040602777 |
| GO_BLOOD_VESSEL_MORPHOGENESIS                                             | 392 | -0.3514186  | -1.7008595 | 0           | 0.04064394  |
| GO_MUSCLE_STRUCTURE_DEVELOPMENT                                           | 340 | -0.35770923 | -1.7005666 | 0           | 0.040677402 |
| GO_BRANCHING_MORPHOGENESIS_OF_AN_EPITHELIAL_TUBE                          | 90  | -0.4232671  | -1.6998004 | 0.003875969 | 0.040781867 |
| GO_AUTONOMIC_NERVOUS_SYSTEM_DEVELOPMENT                                   | 22  | -0.56357485 | -1.6998339 | 0.010526316 | 0.04085586  |
| GO_REGULATION_OF_METANEPHROS_DEVELOPMENT                                  | 17  | -0.6053672  | -1.6983639 | 0.010416667 | 0.04088371  |
| GO_CONNECTIVE_TISSUE_DEVELOPMENT                                          | 152 | -0.38680217 | -1.6985917 | 0           | 0.040928993 |
| GO_LYMPHOCYTE_CHEMOTAXIS                                                  | 38  | -0.49954575 | -1.698774  | 0.006230529 | 0.040974207 |
| GO_NEUROPEPTIDE_RECEPTOR_BINDING                                          | 15  | -0.6491911  | -1.6987972 | 0.015463918 | 0.041052368 |
| REACTOME_RECOGNITION_OF_DNA_DAMAGE_BY_PCNA_CONTAINING_REPLICATION_COMPLEX | 19  | 0.61787754  | 1.630403   | 0.009917355 | 0.041327152 |
| GO_RNA_HELICASE_ACTIVITY                                                  | 34  | 0.55982214  | 1.6289477  | 0.003039514 | 0.041847114 |
| GO_CELL_JUNCTION_ORGANIZATION                                             | 179 | -0.38560086 | -1.6951765 | 0           | 0.041847307 |
| GO_SEQUENCE_SPECIFIC_DOUBLE_STRANDED_DNA_BINDING                          | 431 | -0.34424165 | -1.6954559 | 0           | 0.041853327 |
| KEGG_NOD_LIKE_RECEPTOR_SIGNALING_PATHWAY                                  | 39  | -0.4862451  | -1.6942086 | 0.005865103 | 0.042128786 |
| GO_MRNA_EXPORT_FROM_NUCLEUS                                               | 59  | 0.49619472  | 1.6280223  | 0.005822416 | 0.04215793  |
| GO_POTASSIUM_ION_IMPORT_ACROSS_PLASMA_MEMBRANE                            | 30  | -0.5242157  | -1.6935912 | 0.00621118  | 0.04222234  |
| GO_CELLULAR_RESPONSE_TO_IONIZING_RADIATION                                | 35  | -0.5119044  | -1.6932251 | 0.002949853 | 0.042255484 |
| REACTOME_SUMOYLATION_OF_RNA_BINDING_PROTEINS                              | 27  | 0.5724405   | 1.6267048  | 0.006359301 | 0.042625483 |
| GO_NEGATIVE_REGULATION_OF_PHOSPHORUS_METABOLIC_PROCESS                    | 319 | -0.35716823 | -1.6915123 | 0           | 0.04265337  |
| GO_GOLGI_TO_PLASMA_MEMBRANE_TRANSPORT                                     | 31  | 0.56839967  | 1.626088   | 0.010989011 | 0.042678103 |
| GO_POSITIVE_REGULATION_OF_TYROSINE_PHOSPHORYLATION_OF_STAT_PROTEIN        | 40  | -0.501054   | -1.691524  | 0.003355705 | 0.042749684 |
| GO_POSITIVE_REGULATION_OF_HEART_GROWTH                                    | 25  | -0.56134313 | -1.6904899 | 0.002590674 | 0.042772785 |
| GO_ORGANELLE_LOCALIZATION                                                 | 336 | 0.40205908  | 1.6260997  | 0           | 0.042782858 |
| GO_SPECIFICATION_OF_ANIMAL_ORGAN_IDENTITY                                 | 21  | -0.5700414  | -1.6907277 | 0.005434783 | 0.042785015 |
| GO_POSITIVE_REGULATION_OF_ANIMAL_ORGAN_MORPHOGENESIS                      | 52  | -0.46709442 | -1.69092   | 0           | 0.042785045 |
| GO_REGULATION_OF_RENAL_SYSTEM_PROCESS                                     | 26  | -0.54565597 | -1.6893721 | 0.007792208 | 0.043020386 |
| GO_CARDIAC_MUSCLE_CELL_MEMBRANE_REPOLARIZATION                            | 22  | -0.5591016  | -1.6890085 | 0.013661202 | 0.04304742  |
| GO_MACROPHAGE_ACTIVATION                                                  | 66  | -0.45352718 | -1.6895232 | 0.003636364 | 0.043061256 |



|                                                                         |     |             |            |             |             |
|-------------------------------------------------------------------------|-----|-------------|------------|-------------|-------------|
| GO_RIBOSOMAL_SUBUNIT                                                    | 79  | 0.47609186  | 1.6228224  | 0           | 0.043927945 |
| GO_REGULATION_OF_EPITHELIAL_CELL_APOPTOTIC_PROCESS                      | 55  | -0.46358165 | -1.6862904 | 0           | 0.043983646 |
| GO_DEOXYRIBONUCLEOTIDE_METABOLIC_PROCESS                                | 24  | 0.57239246  | 1.6228902  | 0.007898894 | 0.044006    |
| GO_BODY_MORPHOGENESIS                                                   | 25  | -0.5451487  | -1.6856326 | 0.011627907 | 0.04412155  |
| GO_ADRENERGIC_RECEPTOR_SIGNALING_PATHWAY                                | 16  | -0.62010306 | -1.6852895 | 0.002557545 | 0.044152774 |
| GO_CELLULAR_AMINO_ACID_BIOSYNTHETIC_PROCESS                             | 53  | 0.50535625  | 1.6216469  | 0.011494253 | 0.044354986 |
| REACTOME_REGULATION_OF_RUNX3_EXPRESSION_AND_ACTIVITY                    | 29  | 0.5554836   | 1.6211773  | 0.004587156 | 0.04449213  |
| REACTOME_HEDGEHOG_LIGAND_BIOGENESIS                                     | 34  | 0.5465829   | 1.6207196  | 0.006015038 | 0.044551186 |
| HALLMARK_INTERFERON_ALPHA_RESPONSE                                      | 73  | 0.47321078  | 1.6204228  | 0.001367989 | 0.044563543 |
| GO_LEUKOCYTE_APOPTOTIC_PROCESS                                          | 73  | -0.43958196 | -1.6836828 | 0           | 0.044671733 |
| GO_ENDOTHELIAL_CELL_APOPTOTIC_PROCESS                                   | 38  | -0.48821852 | -1.6823144 | 0.009146341 | 0.04472104  |
| GO_NEURON_PROJECTION_GUIDANCE                                           | 146 | -0.3967125  | -1.6824081 | 0           | 0.044783503 |
| GO_METANEPHROS_MORPHOGENESIS                                            | 20  | -0.5764129  | -1.6825473 | 0.005128205 | 0.04482264  |
| GO_NEGATIVE_REGULATION_OF_T_CELL_PROLIFERATION                          | 38  | -0.49174917 | -1.6827611 | 0.003058104 | 0.044831336 |
| REACTOME_ADORA2B_MEDIATED_ANTI_INFLAMMATORY_CYTOKINES_PRODUCTION        | 62  | -0.4519837  | -1.6830076 | 0           | 0.04483169  |
| GO_REGULATION_OF_RECEPTOR_SIGNALING_PATHWAY_VIA_STAT                    | 77  | -0.42833903 | -1.6814501 | 0           | 0.044942178 |
| GO_ALPHA_AMINO_ACID_BIOSYNTHETIC_PROCESS                                | 44  | 0.511145    | 1.6190175  | 0.007836991 | 0.04504631  |
| GO_UROGENITAL_SYSTEM_DEVELOPMENT                                        | 216 | -0.36623588 | -1.6806185 | 0           | 0.04520438  |
| GO_HELICASE_ACTIVITY                                                    | 77  | 0.46898264  | 1.6180637  | 0.002857143 | 0.045371465 |
| GO_NEGATIVE_REGULATION_OF_AXON_GUIDANCE                                 | 18  | -0.5985322  | -1.6798434 | 0.007614213 | 0.045375615 |
| GO_CELL_CELL_ADHESION_VIA_PLASMA_MEMBRANE_ADHESION_MOLECULES            | 124 | -0.40423733 | -1.6789694 | 0           | 0.045426138 |
| GO_NEGATIVE_REGULATION_OF_GLIOGENESIS                                   | 24  | -0.55691814 | -1.6786952 | 0.008356546 | 0.045446556 |
| REACTOME_CELL_JUNCTION_ORGANIZATION                                     | 59  | -0.44423696 | -1.6793426 | 0           | 0.045469113 |
| GO_MULTICELLULAR_ORGANISMAL_SIGNALING                                   | 117 | -0.40546662 | -1.6790658 | 0           | 0.045474343 |
| GO_SKELETAL_MUSCLE_CONTRACTION                                          | 26  | -0.54511    | -1.6781546 | 0.002832861 | 0.045557935 |
| REACTOME_RESPIRATORY_ELECTRON_TRANSPORT                                 | 54  | 0.49279127  | 1.616998   | 0.00913242  | 0.045778822 |
| REACTOME_G_ALPHA_Q_SIGNALING_EVENTS                                     | 109 | -0.40770492 | -1.6770632 | 0           | 0.045784276 |
| GO_ENDOCHONDRAL_BONE_MORPHOGENESIS                                      | 43  | -0.4903062  | -1.6772543 | 0.009202454 | 0.04581029  |
| GO_CYTOSOLIC_TRANSPORT                                                  | 82  | 0.46470818  | 1.6161895  | 0.004032258 | 0.046020523 |
| GO_DNA_BINDING_TRANSCRIPTION_FACTOR_ACTIVITY_RNA_POLYMERASE_II_SPECIFIC | 478 | -0.3438494  | -1.6761706 | 0           | 0.046037327 |
| GO_PROTEIN_HETEROTETRAMERIZATION                                        | 17  | 0.6312713   | 1.6157919  | 0.013422819 | 0.04606789  |
| GO_REGULATION_OF_NEUROINFLAMMATORY_RESPONSE                             | 22  | -0.567762   | -1.6758226 | 0.01861702  | 0.046123832 |
| GO_REGULATION_OF_LIPOPOLYSACCHARIDE_MEDIATED_SIGNALING_PATHWAY          | 19  | -0.5813051  | -1.6748428 | 0.014634146 | 0.04634986  |
| GO_NEGATIVE_REGULATION_OF_MYELOID_CELL_DIFFERENTIATION                  | 52  | -0.47017822 | -1.6744355 | 0.003311258 | 0.046371695 |
| GO_ENDOCARDIAL_CUSHION_MORPHOGENESIS                                    | 23  | -0.55202675 | -1.67417   | 0.016574586 | 0.046381958 |
| HALLMARK_CHOLESTEROL_HOMEOSTASIS                                        | 50  | -0.46369317 | -1.6739327 | 0.00308642  | 0.046389073 |
| GO_TRANSCRIPTION_INITIATION_FROM_RNA_POLYMERASE_I_PROMOTER              | 20  | 0.61427253  | 1.6146431  | 0.020477816 | 0.04640331  |
| KEGG_PORPHYRIN_AND_CHLOROPHYLL_METABOLISM                               | 17  | 0.6357729   | 1.6148168  | 0.011456628 | 0.046422735 |
| GO_REGULATION_OF_SPINDLE_ORGANIZATION                                   | 25  | 0.57300967  | 1.6142242  | 0.012882448 | 0.046488248 |
| GO_NEGATIVE_REGULATION_OF_CHROMOSOME_ORGANIZATION                       | 62  | 0.4824131   | 1.6131824  | 0           | 0.04656852  |

|                                                                         |     |             |            |             |             |
|-------------------------------------------------------------------------|-----|-------------|------------|-------------|-------------|
| GO_RAN_GTPASE_BINDING                                                   | 17  | 0.6290839   | 1.6138018  | 0.021666666 | 0.04658099  |
| REACTOME_REGULATION_OF_HSF1_MEDIATED_HEAT_SHOCK_RESPONSE                | 57  | 0.48825878  | 1.613381   | 0.006934813 | 0.046584796 |
| GO_ASPARTATE_FAMILY_AMINO_ACID_METABOLIC_PROCESSES                      | 34  | 0.53597116  | 1.6134461  | 0.007763975 | 0.04664801  |
| GO_HETEROTYPIC_CELL_CELL_ADHESION                                       | 43  | -0.4821646  | -1.6727667 | 0           | 0.046720847 |
| GO_SUBSTRATE_ADHESION_DEPENDENT_CELL_SPREADING                          | 68  | -0.43924853 | -1.6719382 | 0.003144654 | 0.046988167 |
| GO_ESTABLISHMENT_OF_RNA_LOCALIZATION                                    | 105 | 0.44669238  | 1.6120319  | 0.001356852 | 0.04701086  |
| GO_POSITIVE_REGULATION_OF_CHEMOTAXIS                                    | 90  | -0.4147404  | -1.6711589 | 0           | 0.047065448 |
| GO_POSITIVE_REGULATION_OF_KIDNEY_DEVELOPMENT                            | 30  | -0.528964   | -1.6713843 | 0.006134969 | 0.047089756 |
| GO_MITOTIC_CYTOKINESIS                                                  | 38  | 0.52841234  | 1.6106144  | 0.013910355 | 0.047342148 |
| GO_REGULATION_OF_CELL_CYCLE_G2_M_PHASE_TRANSITION                       | 105 | 0.44654334  | 1.6100496  | 0           | 0.04741292  |
| GO_DIGESTIVE_SYSTEM_DEVELOPMENT                                         | 86  | -0.41910017 | -1.6696386 | 0           | 0.047438532 |
| PID_LYSOPHOSPHOLIPID_PATHWAY                                            | 43  | -0.46918046 | -1.6691904 | 0.003125    | 0.04745488  |
| GO_AMIDE_BIOSYNTHETIC_PROCESS                                           | 389 | 0.3932275   | 1.6106286  | 0           | 0.04745599  |
| REACTOME_CILIUM_ASSEMBLY                                                | 102 | 0.44904777  | 1.6107348  | 0.001347709 | 0.04750568  |
| GO_METAPHASE_PLATE_CONGRESSION                                          | 30  | 0.5463968   | 1.6101012  | 0.009360374 | 0.04750666  |
| GO_POSITIVE_REGULATION_OF_MYOTUBE_DIFFERENTIATION                       | 18  | -0.592927   | -1.6697202 | 0.015075377 | 0.04751528  |
| GO_NEGATIVE_REGULATION_OF_CELL_ADHESION                                 | 182 | -0.37749168 | -1.6692724 | 0           | 0.04752758  |
| GO_INTRACILIARY_TRANSPORT                                               | 24  | 0.58976924  | 1.6083896  | 0.018604651 | 0.047560465 |
| GO_TELOMERE_CAPPING                                                     | 19  | 0.60607535  | 1.608753   | 0.009615385 | 0.047619846 |
| GO_DOUBLE_STRANDED_RNA_BINDING                                          | 45  | 0.5042573   | 1.6090053  | 0.009022556 | 0.04764142  |
| GO_RNA_PHOSPHODIESTER_BOND_HYDROLYSIS                                   | 69  | 0.47266838  | 1.6084313  | 0.002770083 | 0.047648486 |
| GO_SNARE_COMPLEX                                                        | 23  | 0.60026205  | 1.6092358  | 0.011164274 | 0.04765993  |
| REACTOME_HDR_THROUGH_SINGLE_STRAND_ANNEALING_SSA                        | 20  | 0.6072416   | 1.6078569  | 0.01433121  | 0.04767818  |
| GO_METAL_ION_TRANSMEMBRANE_TRANSPORTER_ACTIVITY                         | 225 | -0.3610945  | -1.6670237 | 0           | 0.04789749  |
| GO_MUSCLE_ORGAN_MORPHOGENESIS                                           | 47  | -0.46528578 | -1.6671084 | 0.003184713 | 0.04795624  |
| GO_RESPONSE_TO_GONADOTROPIN                                             | 22  | -0.55428934 | -1.6660953 | 0.017721519 | 0.04800062  |
| GO_IMMUNE_RECEPTOR_ACTIVITY                                             | 87  | -0.41989675 | -1.6674908 | 0.003921569 | 0.048008516 |
| REACTOME_DISEASES_ASSOCIATED_WITH_GLYCOSAMINOGLYCAN_METABOLISM          | 25  | -0.5375361  | -1.666337  | 0.005763689 | 0.048009276 |
| GO_FORMATION_OF_PRIMARY_GERM_LAYER                                      | 67  | -0.43423527 | -1.6672386 | 0           | 0.04802592  |
| REACTOME_NCAM1_INTERACTIONS                                             | 27  | -0.5375299  | -1.6663513 | 0.013812155 | 0.048104107 |
| GO_LIVER_MORPHOGENESIS                                                  | 15  | -0.63170457 | -1.6644256 | 0.007518797 | 0.04858731  |
| GO_CELL_DIVISION                                                        | 269 | 0.402619    | 1.6053486  | 0           | 0.048705876 |
| GO_POSITIVE_REGULATION_OF_TELOMERE_MAINTENANCE_VIA_TELOMERE_LENGTHENING | 19  | 0.6211174   | 1.6055014  | 0.019769358 | 0.04874604  |
| GO_DNA_REPLICATION_INDEPENDENT_NUCLEOSOME_ORGANIZATION                  | 21  | 0.59774256  | 1.6046218  | 0.014950166 | 0.04889883  |
| KEGG_LINOLEIC_ACID_METABOLISM                                           | 18  | -0.588301   | -1.6635078 | 0.013661202 | 0.048898913 |
| GO_POSITIVE_REGULATION_OF_STRIATED_MUSCLE_CELL_DIFFERENTIATION          | 29  | -0.5230452  | -1.6627986 | 0.002688172 | 0.049134113 |
| GO_PRERIBOSOME_LARGE_SUBUNIT_PRECURSOR                                  | 16  | 0.6288377   | 1.6036634  | 0.024       | 0.04913453  |
| GO_DNA_DEPENDENT_ATPASE_ACTIVITY                                        | 58  | 0.48984092  | 1.6037953  | 0.002902758 | 0.049199477 |
| GO_RESPIRATORY_ELECTRON_TRANSPORT_CHAIN                                 | 57  | 0.48495877  | 1.6031147  | 0.004267425 | 0.049318895 |
| GO_CELL_FATE_SPECIFICATION                                              | 41  | -0.4760854  | -1.6609482 | 0.00295858  | 0.049379833 |

|                                                                                                                            |     |             |            |             |             |
|----------------------------------------------------------------------------------------------------------------------------|-----|-------------|------------|-------------|-------------|
| GO_NEGATIVE_REGULATION_OF_IMMUNE_SYSTEM_PROCESSES                                                                          | 288 | -0.35462293 | -1.6619345 | 0           | 0.049404237 |
| REACTOME_BIOSYNTHESIS_OF_THE_N_GLYCAN_PRECURSOR_DOLICHOL_LIPID_LINKED_OLIGOSACCHARIDE_LINKED_TRANSFER_TO_A_NASCENT_PROTEIN | 51  | 0.501263    | 1.6023973  | 0           | 0.04940991  |
| REACTOME_NR1H3_NR1H2_REGULATE_GENE_EXPRESSION_LINKED_TO_CHOLESTEROL_TRANSPORT_AND_EFFLUX                                   | 17  | 0.62626535  | 1.602618   | 0.0224      | 0.049433682 |
| GO_REGULATION_OF_CYTOSOLIC_CALCIIUM_ION_CONCENTRATION                                                                      | 201 | -0.36857048 | -1.6610609 | 0           | 0.049440324 |
| GO_NCRNA_TRANSCRIPTION                                                                                                     | 55  | 0.49156204  | 1.6021043  | 0.004341534 | 0.04945937  |
| GO_REGULATION_OF_ENDOCRINE_PROCESS                                                                                         | 30  | -0.51058424 | -1.6605202 | 0.002754821 | 0.049469173 |
| GO_ANCHORED_COMPONENT_OF_PLASMA_MEMBRANE                                                                                   | 29  | -0.50680953 | -1.6612033 | 0.005390836 | 0.049472053 |
| GO_REGULATION_OF_LEUKOCYTE_DIFFERENTIATION                                                                                 | 167 | -0.37849465 | -1.6600358 | 0           | 0.04949723  |
| GO_EOSINOPHIL_MIGRATION                                                                                                    | 16  | -0.608542   | -1.6613551 | 0.010282776 | 0.04952966  |
| GO_RENAL_TUBULE_DEVELOPMENT                                                                                                | 59  | -0.4469888  | -1.6601503 | 0.003663004 | 0.04956087  |

**Table S2. CKD-Plum enriched geneset**

| <i>NAME</i>                                                                         | <i>SIZE</i> | <i>ES</i>  | <i>NES</i> | <i>NOM p-val</i> | <i>FDR q-val</i> |
|-------------------------------------------------------------------------------------|-------------|------------|------------|------------------|------------------|
| REACTOME_HOST_INTERACTIONS_OF_HIV_FACTORS                                           | 78          | 0.6683543  | 2.413475   | 0                | 0                |
| HALLMARK_PROTEIN_SECRETION                                                          | 72          | 0.6724704  | 2.392642   | 0                | 0                |
| REACTOME_MITOTIC_METAPHASE_AND_ANAPHASE                                             | 122         | 0.6235686  | 2.3769555  | 0                | 0                |
| HALLMARK_INTERFERON_ALPHA_RESPONSE                                                  | 73          | 0.67290586 | 2.3672793  | 0                | 0                |
| REACTOME_CELL_CYCLE_CHECKPOINTS                                                     | 126         | 0.61805594 | 2.3556974  | 0                | 0                |
| GO_ANTIGEN_PROCESSING_AND_PRESENTATION_OF_EXOGENOUS_PEPTIDE_ANTIGEN_VIA_MHC_CLASS_I | 50          | 0.7093177  | 2.3514268  | 0                | 0                |
| REACTOME_ANTIGEN_PROCESSING_CROSS_PRESENTATION                                      | 67          | 0.66880304 | 2.3394752  | 0                | 0                |
| HALLMARK_INTERFERON_GAMMA_RESPONSE                                                  | 158         | 0.5894067  | 2.3162444  | 0                | 0                |
| HALLMARK_MYC_TARGETS_V1                                                             | 124         | 0.602848   | 2.310885   | 0                | 0                |
| REACTOME_HIV_INFECTION                                                              | 133         | 0.59932905 | 2.302423   | 0                | 0                |
| REACTOME_SEPARATION_OF_SISTER_CHROMATIDS                                            | 93          | 0.6188613  | 2.260279   | 0                | 0                |
| HALLMARK_E2F_TARGETS                                                                | 134         | 0.5881925  | 2.2591953  | 0                | 0                |
| GO_ANTIGEN_PROCESSING_AND_PRESENTATION_OF_PEPTIDIC_ANTIGEN_VIA_MHC_CLASS_I          | 67          | 0.63533163 | 2.2587836  | 0                | 0                |
| KEGG_VIRAL_MYOCARDITIS                                                              | 51          | 0.663247   | 2.247386   | 0                | 0                |
| GO_ANAPHASE_PROMOTING_COMPLEX_DEPENDENT_CATABOLIC_PROCESS                           | 42          | 0.6940226  | 2.2457716  | 0                | 0                |
| REACTOME_APC_C_MEDIATED_DEGRADATION_OF_CELL_CYCLE_PROTEINS                          | 44          | 0.6933524  | 2.2398477  | 0                | 0                |
| GO_AZUROPHIL_GRANULE                                                                | 105         | 0.5958775  | 2.2323115  | 0                | 0                |
| GO_PHAGOCYTIC_VESICLE                                                               | 86          | 0.6120066  | 2.230073   | 0                | 0                |
| GO_ANTIGEN_PROCESSING_AND_PRESENTATION_OF_PEPTIDIC_ANTIGEN                          | 134         | 0.57415617 | 2.2149522  | 0                | 0                |
| REACTOME_M_PHASE                                                                    | 181         | 0.55884045 | 2.2048626  | 0                | 0                |
| REACTOME_METABOLISM_OF_RNA                                                          | 323         | 0.5263727  | 2.201286   | 0                | 0                |
| REACTOME_SWITCHING_OF_ORIGINS_TO_A_POST_REPLICATIVE_STATE                           | 45          | 0.6668859  | 2.188853   | 0                | 0                |
| REACTOME_CLASS_I_MHC_MEDIATED_ANTIGEN_PROCESSING_PRESENTATION                       | 192         | 0.54258734 | 2.1795783  | 0                | 0                |
| REACTOME_G2_M_CHECKPOINTS                                                           | 72          | 0.61519164 | 2.1743748  | 0                | 0                |
| HALLMARK_KRAS_SIGNALING_DN                                                          | 136         | -0.5605149 | -2.460704  | 0                | 0                |
| GO_SODIUM_ION_TRANSMEMBRANE_TRANSPORTER_ACTIVITY                                    | 89          | -0.5845436 | -2.412706  | 0                | 0                |
| GO_RIBONUCLEOPROTEIN_COMPLEX                                                        | 326         | 0.5139593  | 2.155488   | 0                | 3.12E-05         |
| REACTOME_INTERFERON_SIGNALING                                                       | 132         | 0.55430675 | 2.1557667  | 0                | 3.23E-05         |
| REACTOME_ANTIVIRAL_MECHANISM_BY_IFN_STIMULATED_GENES                                | 54          | 0.64387107 | 2.1563647  | 0                | 3.34E-05         |
| REACTOME_PROCESSING_OF_CAPPED_INTRON_CONTAINING_PRE_MRNA                            | 129         | 0.5698105  | 2.1568973  | 0                | 3.46E-05         |
| GO_ANTIGEN_PROCESSING_AND_PRESENTATION                                              | 161         | 0.552038   | 2.1625018  | 0                | 3.59E-05         |
| GO_RNA_EXPORT_FROM_NUCLEUS                                                          | 74          | 0.6091065  | 2.165959   | 0                | 3.72E-05         |
| HALLMARK_ALLOGRAFT_REJECTION                                                        | 148         | 0.5600111  | 2.168533   | 0                | 3.87E-05         |
| GO_SPLICEOSOMAL_COMPLEX                                                             | 91          | 0.5883961  | 2.144017   | 0                | 6.10E-05         |
| GO_KINETOCHORE                                                                      | 63          | 0.61786777 | 2.1375122  | 0                | 1.48E-04         |
| REACTOME_CELL_CYCLE_MITOTIC                                                         | 265         | 0.51810133 | 2.1336925  | 0                | 1.73E-04         |
| REACTOME_POSTMITOTIC_NUCLEAR_PORE_COMPLEX_NPC_REFORMATION                           | 17          | 0.81021106 | 2.1323197  | 0                | 1.97E-04         |
| REACTOME_FCERI_MEDIATED_NF_KB_ACTIVATION                                            | 55          | 0.6243203  | 2.1280785  | 0                | 2.18E-04         |

|                                                                                                                           |     |            |           |   |             |
|---------------------------------------------------------------------------------------------------------------------------|-----|------------|-----------|---|-------------|
| REACTOME_ORC1_REMOVAL_FROM_CHROMATIN                                                                                      | 38  | 0.6731818  | 2.1245267 | 0 | 2.39E-04    |
| REACTOME_MITOTIC_SPINDLE_CHECKPOINT                                                                                       | 49  | 0.64322543 | 2.1211483 | 0 | 2.84E-04    |
| REACTOME_MITOTIC_PROPHASE                                                                                                 | 47  | 0.6414262  | 2.1095634 | 0 | 3.11E-04    |
| GO_RNA_LOCALIZATION                                                                                                       | 120 | 0.5554457  | 2.1131606 | 0 | 3.19E-04    |
| REACTOME_CELL_CYCLE                                                                                                       | 315 | 0.5057555  | 2.1074698 | 0 | 3.19E-04    |
| REACTOME_APC_C_CDH1_MEDIATED_DEGRADATION_OF_CD<br>C20_AND_OTHER_APC_C_CDH1_TARGETED_PROTEINS_IN_LA<br>TE_MITOSIS_EARLY_G1 | 37  | 0.6849326  | 2.1089606 | 0 | 3.27E-04    |
| REACTOME_REGULATION_OF_RAS_BY_GAPS                                                                                        | 32  | 0.69699717 | 2.1134174 | 0 | 3.27E-04    |
| REACTOME_THE_ROLE_OF_GTSE1_IN_G2_M_PROGRESSION_<br>AFTER_G2_CHECKPOINT                                                    | 47  | 0.6263809  | 2.0998967 | 0 | 3.70E-04    |
| GO_PHAGOCYTIC_VESICLE_MEMBRANE                                                                                            | 50  | 0.63741475 | 2.1003132 | 0 | 3.79E-04    |
| REACTOME_UCH_PROTEINASES                                                                                                  | 40  | 0.66195476 | 2.095549  | 0 | 3.83E-04    |
| GO_NEGATIVE_REGULATION_OF_CELL_CYCLE_G2_M_PHASE_<br>TRANSITION                                                            | 48  | 0.6289131  | 2.093986  | 0 | 3.95E-04    |
| REACTOME_DEFECTIVE_CFTR_CAUSES_CYSTIC_FIBROSIS                                                                            | 31  | 0.68754554 | 2.0906463 | 0 | 4.38E-04    |
| GO_U2_TYPE_SPLICEOSOMAL_COMPLEX                                                                                           | 42  | 0.6452494  | 2.0915813 | 0 | 4.47E-04    |
| REACTOME_RESOLUTION_OF_SISTER_CHROMATID_COHESIO<br>N                                                                      | 61  | 0.6049552  | 2.0875359 | 0 | 4.87E-04    |
| REACTOME_ANTIGEN_PRESENTATION_FOLDING_ASSEMBLY_<br>AND_PEPTIDE_LOADING_OF_CLASS_I_MHC                                     | 23  | 0.73955226 | 2.07766   | 0 | 5.05E-04    |
| GO_PROGRAMMED_NECROTIC_CELL_DEATH                                                                                         | 25  | 0.71164817 | 2.0836613 | 0 | 5.06E-04    |
| GO_CHROMOSOME_CENTROMERIC_REGION                                                                                          | 86  | 0.5661198  | 2.0798142 | 0 | 5.15E-04    |
| GO_RIBONUCLEOPROTEIN_COMPLEX_BIOGENESIS                                                                                   | 198 | 0.52023375 | 2.083983  | 0 | 5.16E-04    |
| REACTOME_DNA_REPLICATION                                                                                                  | 70  | 0.59661293 | 2.0715652 | 0 | 5.57E-04    |
| GO_CATALYTIC_STEP_2_SPLICEOSOME                                                                                           | 43  | 0.63545907 | 2.071652  | 0 | 5.67E-04    |
| REACTOME_S_PHASE                                                                                                          | 87  | 0.5710918  | 2.068202  | 0 | 5.81E-04    |
| GO_FATTY_ACID_CATABOLIC_PROCESS                                                                                           | 73  | -0.5657588 | -2.286948 | 0 | 5.97E-04    |
| GO_RNA_SPLICING_VIA_TRANSESTERIFICATION_REACTIONS                                                                         | 168 | 0.52566296 | 2.0634673 | 0 | 6.76E-04    |
| REACTOME_ASSEMBLY_OF_THE_PRE_REPLICATIVE_COMPLEX                                                                          | 36  | 0.6681778  | 2.064384  | 0 | 6.88E-04    |
| GO_CELLULAR_AMINO_ACID_CATABOLIC_PROCESS                                                                                  | 89  | -0.5506228 | -2.286953 | 0 | 6.97E-04    |
| HALLMARK_G2M_CHECKPOINT                                                                                                   | 122 | 0.53573596 | 2.06152   | 0 | 7.14E-04    |
| REACTOME_PROGRAMMED_CELL_DEATH                                                                                            | 109 | 0.54637504 | 2.0468585 | 0 | 8.34E-04    |
| GO_SENSORY_PERCEPTION_OF_SMELL                                                                                            | 30  | -0.6915641 | -2.289806 | 0 | 8.36E-04    |
| GO_AZUROPHIL_GRANULE_MEMBRANE                                                                                             | 36  | 0.66228294 | 2.0471241 | 0 | 8.48E-04    |
| GO_ENDOPEPTIDASE_COMPLEX                                                                                                  | 33  | 0.66031414 | 2.0483294 | 0 | 8.61E-04    |
| GO_HOST_CELLULAR_COMPONENT                                                                                                | 42  | 0.638308   | 2.0447505 | 0 | 8.67E-04    |
| GO_NECROTIC_CELL_DEATH                                                                                                    | 30  | 0.68386763 | 2.0418549 | 0 | 8.85E-04    |
| REACTOME_STABILIZATION_OF_P53                                                                                             | 27  | 0.69522655 | 2.0393019 | 0 | 8.86E-04    |
| GO_POSITIVE_REGULATION_OF_TYPE_I_INTERFERON_PRODU<br>CTION                                                                | 47  | 0.6182728  | 2.042477  | 0 | 8.98E-04    |
| KEGG_NEUROACTIVE_LIGAND_RECEPTOR_INTERACTION                                                                              | 138 | -0.5221464 | -2.268368 | 0 | 9.14E-04    |
| GO_HORMONE_ACTIVITY                                                                                                       | 59  | -0.5840501 | -2.241135 | 0 | 9.30E-04    |
| PID_ERBB1_RECEPTOR_PROXIMAL_PATHWAY                                                                                       | 24  | 0.69912606 | 2.0348592 | 0 | 9.87E-04    |
| REACTOME_REGULATION_OF_RUNX3_EXPRESSION_AND_ACT<br>IVITY                                                                  | 29  | 0.69113886 | 2.033812  | 0 | 0.001001003 |
| KEGG_UBIQUITIN_MEDIATED_PROTEOLYSIS                                                                                       | 71  | 0.58129984 | 2.0352154 | 0 | 0.001001705 |
| REACTOME_VIRAL_MESSENGER_RNA_SYNTHESIS                                                                                    | 27  | 0.69172996 | 2.03148   | 0 | 0.001014219 |
| GO_DNA_CONFORMATION_CHANGE                                                                                                | 127 | 0.52750814 | 2.0296998 | 0 | 0.001040358 |
| GO_ALPHA_AMINO_ACID_CATABOLIC_PROCESS                                                                                     | 72  | -0.5748448 | -2.297001 | 0 | 0.001045281 |

|                                                                      |     |            |           |             |             |
|----------------------------------------------------------------------|-----|------------|-----------|-------------|-------------|
| GO_DNA_GEOMETRIC_CHANGE                                              | 67  | 0.5758989  | 2.025008  | 0           | 0.001073774 |
| GO_MRNA_PROCESSING                                                   | 242 | 0.4890593  | 2.026046  | 0           | 0.001076277 |
| GO_MRNA_METABOLIC_PROCESS                                            | 380 | 0.4770255  | 2.026261  | 0           | 0.001077923 |
| REACTOME_NEUTROPHIL_DEGRANULATION                                    | 334 | 0.4791263  | 2.025177  | 0           | 0.001087903 |
| REACTOME_TRANSLATION                                                 | 134 | 0.5221553  | 2.0263937 | 0           | 0.001092689 |
| GO_NUCLEAR_CHROMOSOME_TELOMERIC_REGION                               | 53  | 0.606775   | 2.0152323 | 0           | 0.00117406  |
| REACTOME_SYNTHESIS_OF_ACTIVE_UBIQUITIN_ROLES_OF_E1_AND_E2_ENZYMES    | 19  | 0.73846656 | 2.0157442 | 0           | 0.001176338 |
| KEGG_ANTIGEN_PROCESSING_AND_PRESENTATION                             | 57  | 0.59665555 | 2.0161102 | 0           | 0.001190178 |
| REACTOME_DEGRADATION_OF_BETA_CATENIN_BY_THE_DESTRUCTION_COMPLEX      | 42  | 0.62988997 | 2.0132687 | 0           | 0.001193809 |
| GO_NCRNA_EXPORT_FROM_NUCLEUS                                         | 25  | 0.6940861  | 2.020393  | 0           | 0.001197141 |
| GO_MRNA_EXPORT_FROM_NUCLEUS                                          | 59  | 0.5931361  | 2.016747  | 0           | 0.001204347 |
| REACTOME_MRNA_SPLICING                                               | 96  | 0.5454254  | 2.0044754 | 0           | 0.001218812 |
| GO_CHROMOSOMAL_REGION                                                | 151 | 0.52038366 | 2.0168073 | 0           | 0.001218857 |
| REACTOME_NUCLEAR_ENVELOPE_NE_REASSEMBLY                              | 50  | 0.6115079  | 2.0171525 | 0           | 0.001221961 |
| REACTOME_G1_S_DNA_DAMAGE_CHECKPOINTS                                 | 32  | 0.65968525 | 2.017503  | 0           | 0.001228022 |
| GO_TYPE_I_INTERFERON_PRODUCTION                                      | 72  | 0.57174516 | 2.0181453 | 0           | 0.001231318 |
| KEGG_PROTEASOME                                                      | 24  | 0.70372576 | 2.0049481 | 0           | 0.001231778 |
| KEGG_ALLOGRAFT_REJECTION                                             | 24  | 0.7059225  | 2.017169  | 0           | 0.001237046 |
| GO_NUCLEAR_EXPORT                                                    | 104 | 0.5401977  | 2.0052204 | 0           | 0.001245023 |
| GO_CONDENSED_CHROMOSOME_CENTROMERIC_REGION                           | 53  | 0.59363914 | 2.002783  | 0           | 0.001246803 |
| REACTOME_PROTEIN_UBIQUITINATION                                      | 39  | 0.62446404 | 2.0085537 | 0           | 0.00125085  |
| REACTOME_DOWNSTREAM_SIGNALING_EVENTS_OF_B_CELL_RECEPTOR_BCR          | 43  | 0.62929213 | 2.011065  | 0           | 0.001256932 |
| GO_ENDOSOME_ORGANIZATION                                             | 36  | 0.6318954  | 2.0055974 | 0           | 0.001258556 |
| GO_SENSORY_PERCEPTION_OF_CHEMICAL_STIMULUS                           | 56  | -0.5819722 | -2.216829 | 0           | 0.001259764 |
| REACTOME_CROSS_PRESENTATION_OF_SOLUBLE_EXOGENOUS_ANTIGENS_ENDOSOMES  | 29  | 0.6714386  | 2.0088847 | 0.001605136 | 0.001264748 |
| REACTOME_SRP_DEPENDENT_COTRANSLATIONAL_PROTEIN_TARGETING_TO_MEMBRANE | 47  | 0.610097   | 1.9983505 | 0           | 0.001339632 |
| GO_PEPTIDASE_COMPLEX                                                 | 44  | 0.61614156 | 2.0000222 | 0.001490313 | 0.00135091  |
| REACTOME_INTERACTIONS_OF_REV_WITH_HOST_CELLULAR_PROTEINS             | 23  | 0.70071656 | 1.9990311 | 0           | 0.001353029 |
| REACTOME_INFLUENZA_INFECTION                                         | 72  | 0.5707184  | 1.9993372 | 0           | 0.001356855 |
| REACTOME_TRANSCRIPTIONAL_REGULATION_BY_SMALL_RNAS                    | 30  | 0.6686289  | 2.0000768 | 0           | 0.001364837 |
| GO_POTASSIUM_ION_TRANSMEMBRANE_TRANSPORTER_ACTIVITY                  | 74  | -0.5765718 | -2.30041  | 0           | 0.001393708 |
| REACTOME_AUF1_HNRNP_D0_BINDS_AND_DESTABILIZES_MRNA                   | 29  | 0.66961646 | 1.997122  | 0           | 0.001422124 |
| GO_PROTEIN_CONTAINING_COMPLEX_LOCALIZATION                           | 155 | 0.51193315 | 1.9965429 | 0           | 0.001427157 |
| REACTOME_SCF_SKP2_MEDIATED_DEGRADATION_OF_P27_P21                    | 34  | 0.65159315 | 1.9954381 | 0           | 0.001431983 |
| GO_INTERFERON_BETA_PRODUCTION                                        | 31  | 0.65729177 | 1.9944184 | 0           | 0.001432334 |
| GO_MONOVALENT_INORGANIC_CATION_TRANSMEMBRANE_TRANSPORTER_ACTIVITY    | 190 | -0.477648  | -2.202571 | 0           | 0.001435763 |
| GO_COPII_COATED_ER_TO_GOLGI_TRANSPORT_VESICLE                        | 57  | 0.58376306 | 1.9945245 | 0           | 0.001436896 |
| REACTOME_DNA_REPLICATION_PRE_INITIATION                              | 48  | 0.6091872  | 1.9922173 | 0           | 0.001500539 |
| REACTOME_TRNA_PROCESSING_IN_THE_NUCLEUS                              | 33  | 0.6474962  | 1.9910709 | 0           | 0.001513663 |
| REACTOME_SUMOYLATION_OF_DNA_REPLICATION_PROTEINS                     | 31  | 0.66345    | 1.9879491 | 0           | 0.001562276 |

|                                                                                          |     |            |           |             |             |
|------------------------------------------------------------------------------------------|-----|------------|-----------|-------------|-------------|
| PID_INTEGRIN_A4B1_PATHWAY                                                                | 21  | 0.7109409  | 1.9869119 | 0.003327787 | 0.001565795 |
| GO_RESPONSE_TO_INTERFERON_BETA                                                           | 21  | 0.7169579  | 1.9856813 | 0           | 0.001578085 |
| GO_STEROID_HORMONE_RECEPTOR_ACTIVITY                                                     | 34  | -0.6448715 | -2.191557 | 0           | 0.001657305 |
| GO_G_PROTEIN_COUPLED_RECEPTOR_ACTIVITY                                                   | 202 | -0.4700158 | -2.197719 | 0           | 0.00166928  |
| REACTOME_DEGRADATION_OF_AXIN                                                             | 30  | 0.6542184  | 1.9801168 | 0           | 0.001694291 |
| GO_ORGANIC_ACID_CATABOLIC_PROCESS                                                        | 190 | -0.4783824 | -2.192588 | 0           | 0.00178479  |
| REACTOME_RHO_GTPASES_ACTIVATES_FORMINS                                                   | 69  | 0.56543046 | 1.9759989 | 0           | 0.001791979 |
| REACTOME_TRANSPORT_OF_MATURE_TRANSCRIPT_TO_CYTOSOL                                       | 50  | 0.59973985 | 1.9763703 | 0           | 0.001807837 |
| REACTOME_ADAPTIVE_IMMUNE_SYSTEM                                                          | 450 | 0.46047106 | 1.9749211 | 0           | 0.001810212 |
| GO_MONOCARBOXYLIC_ACID_CATABOLIC_PROCESS                                                 | 89  | -0.5269705 | -2.176902 | 0           | 0.001831304 |
| KEGG_LEISHMANIA_INFECTION                                                                | 42  | 0.6137698  | 1.9733098 | 0           | 0.001853466 |
| GO_AZUROPHIL_GROUNDS_LUMEN                                                               | 62  | 0.5679229  | 1.9719062 | 0           | 0.001895882 |
| GO_RNA_CATABOLIC_PROCESS                                                                 | 183 | 0.49263284 | 1.9699306 | 0           | 0.001921028 |
| GO_MHC_PROTEIN_COMPLEX                                                                   | 17  | 0.73082024 | 1.9704585 | 0           | 0.001929204 |
| REACTOME_SIGNALING_BY_ROBO_RECEPTORS                                                     | 104 | 0.5279906  | 1.9676455 | 0           | 0.001945341 |
| PID_NECTIN_PATHWAY                                                                       | 18  | 0.7418624  | 1.9687015 | 0           | 0.001953455 |
| GO_GDP_BINDING                                                                           | 47  | 0.5960626  | 1.9677721 | 0           | 0.001961287 |
| REACTOME_TCR_SIGNALING                                                                   | 73  | 0.56164145 | 1.9687763 | 0           | 0.001969734 |
| REACTOME_TRANSPORT_OF_MATURE_MRNAs_DERIVED_FROM_INTRONLESS_TRANSCRIPTS                   | 24  | 0.6879771  | 1.9656267 | 0           | 0.001984597 |
| GO_SCF_DEPENDENT_PROTEASOMAL_UBIQUITIN_DEPENDENT_PROTEIN_CATABOLIC_PROCESS               | 46  | 0.5973283  | 1.9611667 | 0           | 0.002021237 |
| REACTOME_NOD1_2_SIGNALING_PATHWAY                                                        | 16  | 0.7662903  | 1.9616158 | 0           | 0.002021794 |
| GO_DEFENSE_RESPONSE_TO_VIRUS                                                             | 143 | 0.5062812  | 1.9619421 | 0           | 0.002037714 |
| GO_RNA_SPLICING                                                                          | 214 | 0.48537934 | 1.9626162 | 0           | 0.002038427 |
| GO_VACUOLAR_MEMBRANE                                                                     | 234 | 0.48266897 | 1.9607816 | 0           | 0.002043405 |
| GO_CADHERIN_BINDING                                                                      | 198 | 0.48964214 | 1.9627916 | 0           | 0.002054734 |
| REACTOME_NUCLEAR_RECEPTOR_TRANSCRIPTION_PATHWAY                                          | 31  | -0.6551102 | -2.153754 | 0           | 0.00211145  |
| GO_CATION_CHANNEL_COMPLEX                                                                | 93  | -0.5237495 | -2.160498 | 0           | 0.002111707 |
| GO_PROTEIN_LOCALIZATION_TO_CHROMOSOME                                                    | 32  | 0.6360091  | 1.9543889 | 0           | 0.002170101 |
| REACTOME_NUCLEAR_PORE_COMPLEX_NPC_DISASSEMBLY                                            | 23  | 0.6804927  | 1.9534518 | 0           | 0.002175698 |
| REACTOME_REGULATION_OF_PTEN_STABILITY_AND_ACTIVITY                                       | 39  | 0.62203604 | 1.954784  | 0           | 0.002179047 |
| GO_PIGMENT_GROUNDS                                                                       | 80  | 0.5442307  | 1.9557768 | 0           | 0.00218072  |
| REACTOME_HIV_LIFE_CYCLE                                                                  | 80  | 0.5488813  | 1.9561527 | 0           | 0.002182553 |
| PID_FANCONI_PATHWAY                                                                      | 25  | 0.67534906 | 1.9562125 | 0           | 0.002199213 |
| GO_CELL_SUBSTRATE_JUNCTION                                                               | 281 | 0.47149956 | 1.9514256 | 0           | 0.002202265 |
| GO_NUCLEAR_PORE                                                                          | 48  | 0.58513963 | 1.9510076 | 0           | 0.00220744  |
| GO_REGULATION_OF_SYMBIOSIS_ENCOMPASSING_MUTUALISM_THROUGH_PARASITISM                     | 136 | 0.504837   | 1.9479407 | 0           | 0.002259274 |
| PID_INTEGRIN3_PATHWAY                                                                    | 34  | 0.6287587  | 1.9484311 | 0           | 0.002263725 |
| PID_BARD1_PATHWAY                                                                        | 18  | 0.7225129  | 1.9480375 | 0           | 0.002275184 |
| GO_MULTI_ORGANISM_LOCALIZATION                                                           | 36  | 0.6272253  | 1.9484799 | 0           | 0.002279895 |
| KEGG_SPLICEOSOME                                                                         | 69  | 0.55618626 | 1.9464375 | 0           | 0.002288356 |
| GO_REGULATION_OF_ESTABLISHMENT_OF_PLANAR_POLARITY                                        | 64  | 0.56321174 | 1.9486918 | 0           | 0.002289328 |
| GO_INTRINSIC_APOPTOTIC_SIGNALING_PATHWAY_IN_RESPONSE_TO_DNA_DAMAGE_BY_P53_CLASS_MEDIATOR | 26  | 0.67009497 | 1.9465585 | 0           | 0.002297482 |

|                                                                                                           |     |            |           |             |             |
|-----------------------------------------------------------------------------------------------------------|-----|------------|-----------|-------------|-------------|
| GO_NEGATIVE_REGULATION_OF_VIRAL_GENOME_REPLICATI<br>ON                                                    | 39  | 0.6171654  | 1.9417236 | 0           | 0.002359385 |
| GO_MIDBODY                                                                                                | 91  | 0.5268361  | 1.9418963 | 0           | 0.002368441 |
| KEGG_SYSTEMIC_LUPUS_ERYTHEMATOSUS                                                                         | 37  | 0.6236773  | 1.943554  | 0           | 0.002376546 |
| GO_GOLGI_VESICLE_TRANSPORT                                                                                | 206 | 0.47802287 | 1.9424427 | 0           | 0.002384126 |
| GO_MITOTIC_CYTOKINESIS                                                                                    | 38  | 0.6190112  | 1.9437814 | 0           | 0.002386203 |
| GO_PROTEIN_FOLDING                                                                                        | 131 | 0.49929637 | 1.9354018 | 0           | 0.002396582 |
| REACTOME_NUCLEOTIDE_BINDING_DOMAIN_LEUCINE_RICH_<br>REPEAT_CONTAINING_RECEPTOR_NLR_SIGNALING_PATHWAY<br>S | 27  | 0.6622143  | 1.9431028 | 0           | 0.002399883 |
| REACTOME_MITOTIC_G1_PHASE_AND_G1_S_TRANSITION                                                             | 86  | 0.5326739  | 1.9424627 | 0           | 0.00240002  |
| REACTOME_SNRNP_ASSEMBLY                                                                                   | 28  | 0.65419376 | 1.9429327 | 0           | 0.002403221 |
| GO_MHC_CLASS_II_PROTEIN_COMPLEX_BINDING                                                                   | 16  | 0.76275444 | 1.93569   | 0           | 0.002411468 |
| REACTOME_NUCLEAR_IMPORT_OF_REV_PROTEIN                                                                    | 22  | 0.69014525 | 1.934612  | 0           | 0.002411633 |
| REACTOME_RHO_GTPASE_EFFECTORS                                                                             | 148 | 0.4976135  | 1.9368273 | 0           | 0.002423487 |
| GO_REGULATION_OF_HEMATOPOIETIC_PROGENITOR_CELL_<br>DIFFERENTIATION                                        | 50  | 0.58338815 | 1.9360948 | 0           | 0.00242654  |
| REACTOME_RUNX1_REGULATES_TRANSCRIPTION_OF_GENES_<br>INVOLVED_IN_DIFFERENTIATION_OF_HSCS                   | 39  | 0.60344887 | 1.9343209 | 0           | 0.002426729 |
| REACTOME_CYTOSOLIC_SENSORS_OF_PATHOGEN_ASSOCIAT<br>ED_DNA                                                 | 32  | 0.63295496 | 1.9369661 | 0           | 0.002438826 |
| REACTOME_DEUBIQUITINATION                                                                                 | 120 | 0.509128   | 1.9386634 | 0           | 0.002438944 |
| GO_POSITIVE_REGULATION_OF_I_KAPPAB_KINASE_NF_KAPP<br>AB_SIGNALING                                         | 118 | 0.5054073  | 1.9374415 | 0           | 0.002439043 |
| REACTOME_SIGNALING_BY_NOTCH4                                                                              | 49  | 0.5944206  | 1.937016  | 0           | 0.002448214 |
| REACTOME_REGULATION_OF_EXPRESSION_OF_SLITS_AND_R<br>OBOS                                                  | 77  | 0.54209906 | 1.937962  | 0           | 0.002454778 |
| GO_RIBOSOME_BIOGENESIS                                                                                    | 136 | 0.50074947 | 1.9327089 | 0           | 0.002485502 |
| GO_DNA_DEPENDENT_ATPASE_ACTIVITY                                                                          | 58  | 0.5597963  | 1.9316314 | 0           | 0.002490737 |
| GO_MHC_PROTEIN_COMPLEX_BINDING                                                                            | 23  | 0.68576616 | 1.9317605 | 0           | 0.002499806 |
| GO_REGULATION_OF_VIRAL_LIFE_CYCLE                                                                         | 87  | 0.5272255  | 1.9327185 | 0           | 0.002500566 |
| GO_UBIQUITIN_LIKE_PROTEIN_CONJUGATING_ENZYME_ACTI<br>VITY                                                 | 24  | 0.6749868  | 1.9305564 | 0           | 0.002516119 |
| REACTOME_SUMOYLATION_OF_DNA_DAMAGE_RESPONSE_A<br>ND_REPAIR_PROTEINS                                       | 41  | 0.60050553 | 1.9296255 | 0           | 0.002535647 |
| GO_ERAD_PATHWAY                                                                                           | 48  | 0.5886717  | 1.9289852 | 0           | 0.002566368 |
| REACTOME_TRANSCRIPTIONAL_REGULATION_BY_RUNX3                                                              | 52  | 0.57391006 | 1.9277834 | 0           | 0.002596396 |
| REACTOME_INTERLEUKIN_1_SIGNALING                                                                          | 53  | 0.57693774 | 1.9270319 | 0           | 0.002609363 |
| GO_MODIFICATION_DEPENDENT_MACROMOLECULE_CATAB<br>OLIC_PROCESS                                             | 305 | 0.4638428  | 1.9262484 | 0           | 0.002633506 |
| REACTOME_NEGATIVE_REGULATION_OF_NOTCH4_SIGNALIN<br>G                                                      | 33  | 0.6278123  | 1.9252969 | 0           | 0.002640555 |
| REACTOME_SIGNALING_BY_THE_B_CELL_RECEPTOR_BCR                                                             | 76  | 0.53971654 | 1.9221085 | 0           | 0.002754397 |
| REACTOME_SUMOYLATION_OF_UBIQUITINYLATION_PROTEIN<br>S                                                     | 22  | 0.6879254  | 1.9222535 | 0           | 0.002759081 |
| GO_CELLULAR_PROTEIN_CATABOLIC_PROCESS                                                                     | 388 | 0.45474252 | 1.9225366 | 0           | 0.002769254 |
| REACTOME_SUMOYLATION_OF_SUMOYLATION_PROTEINS                                                              | 23  | 0.6822891  | 1.9208729 | 0           | 0.002783036 |
| REACTOME_SUMOYLATION_OF_CHROMATIN_ORGANIZATION<br>_PROTEINS                                               | 35  | 0.6123164  | 1.9204304 | 0.001567398 | 0.002789297 |
| GO_REGULATION_OF_CELL_CYCLE_G2_M_PHASE_TRANSITIO<br>N                                                     | 105 | 0.5192802  | 1.9202278 | 0           | 0.002789948 |



|                                                                                               |     |            |           |             |             |
|-----------------------------------------------------------------------------------------------|-----|------------|-----------|-------------|-------------|
| GO_POSITIVE_REGULATION_OF_WNT_SIGNALING_PATHWAY                                               | 103 | 0.5106695  | 1.9209391 | 0           | 0.002793194 |
| GO_MYELOID_LEUKOCYTE_MEDIATED_IMMUNITY                                                        | 389 | 0.45028362 | 1.9190408 | 0           | 0.002849075 |
| GO_RNA_DEPENDENT_DNA_BIOSYNTHETIC_PROCESS                                                     | 33  | 0.6208147  | 1.917503  | 0           | 0.002886393 |
| REACTOME_HCMV_EARLY_EVENTS                                                                    | 47  | 0.57935673 | 1.9169625 | 0           | 0.002896797 |
| GO_PROTEASOMAL_PROTEIN_CATABOLIC_PROCESS                                                      | 239 | 0.46717048 | 1.9161325 | 0           | 0.002912631 |
| KEGG_LYSOSOME                                                                                 | 92  | 0.5260706  | 1.9162414 | 0           | 0.002912673 |
| REACTOME_SUMOYLATION_OF_RNA_BINDING_PROTEINS                                                  | 27  | 0.64446086 | 1.9164059 | 0           | 0.002922951 |
| REACTOME_INTEGRIN_CELL_SURFACE_INTERACTIONS                                                   | 65  | 0.5542226  | 1.9164076 | 0           | 0.002938666 |
| GO_PROTEIN_MODIFICATION_BY_SMALL_PROTEIN_REMOVAL                                              | 123 | 0.49972913 | 1.9138857 | 0           | 0.002947686 |
| GO_ESTABLISHMENT_OF_PROTEIN_LOCALIZATION_TO_ENDOPLASMIC_RETICULUM                             | 43  | 0.5942194  | 1.9140451 | 0           | 0.002957893 |
| REACTOME_UB_SPECIFIC_PROCESSING_PROTEASES                                                     | 90  | 0.521659   | 1.9150809 | 0           | 0.002958273 |
| REACTOME_INTERACTIONS_OF_VPR_WITH_HOST_CELLULAR_PROTEINS                                      | 24  | 0.65915966 | 1.9143323 | 0           | 0.00297338  |
| GO_AXONAL_GROWTH_CONE                                                                         | 17  | 0.72240376 | 1.91312   | 0           | 0.002982491 |
| PID_CASPASE_PATHWAY                                                                           | 38  | 0.6040622  | 1.9096655 | 0           | 0.003150451 |
| GO_RIBONUCLEOPROTEIN_COMPLEX_SUBUNIT_ORGANIZATION                                             | 87  | 0.52487624 | 1.908705  | 0           | 0.003159082 |
| GO_REGULATION_OF_VIRAL_GENOME_REPLICATION                                                     | 58  | 0.56789076 | 1.9097884 | 0           | 0.003161674 |
| GO_PROTEIN_K48_LINKED_UBIQUITINATION                                                          | 30  | 0.64388335 | 1.9068406 | 0           | 0.003200188 |
| REACTOME_HEDGEHOG_LIGAND_BIOGENESIS                                                           | 34  | 0.6261041  | 1.9069037 | 0           | 0.003216351 |
| REACTOME_NUCLEAR_ENVELOPE_BREAKDOWN                                                           | 36  | 0.61204135 | 1.9056691 | 0           | 0.003237747 |
| REACTOME_METABOLISM_OF_POLYAMINES                                                             | 36  | 0.6130805  | 1.9050634 | 0           | 0.003249255 |
| REACTOME_CELLULAR_RESPONSE_TO_HYPOXIA                                                         | 39  | 0.6083603  | 1.9052819 | 0.001531394 | 0.003250851 |
| GO_REGULATION_OF_PROTEIN_MATURATION                                                           | 41  | 0.5956331  | 1.9044148 | 0           | 0.00329077  |
| GO_INTRINSIC_COMPONENT_OF_ENDOPLASMIC_RETICULUM_MEMBRANE                                      | 92  | 0.5230191  | 1.9031708 | 0           | 0.0033061   |
| GO_GLYCOSPHINGOLIPID_METABOLIC_PROCESS                                                        | 40  | 0.5859541  | 1.903891  | 0           | 0.00330797  |
| GO_RNA_3_END_PROCESSING                                                                       | 67  | 0.54325616 | 1.9009006 | 0           | 0.003398546 |
| KEGG_O_GLYCAN_BIOSYNTHESIS                                                                    | 17  | 0.72155845 | 1.9001521 | 0           | 0.003403404 |
| GO_PROTEIN_DNA_COMPLEX_SUBUNIT_ORGANIZATION                                                   | 114 | 0.50537235 | 1.8997962 | 0           | 0.003405628 |
| GO_LUMENAL_SIDE_OF_MEMBRANE                                                                   | 22  | 0.68043214 | 1.9003808 | 0           | 0.003415151 |
| REACTOME_DIGESTION_AND_ABSORPTION                                                             | 16  | -0.7560031 | -2.115295 | 0           | 0.003416061 |
| REACTOME_TRANSCRIPTIONAL_REGULATION_BY_RUNX2                                                  | 71  | 0.5283359  | 1.8991886 | 0           | 0.003435552 |
| REACTOME_EPH_EPHRIN_SIGNALING                                                                 | 64  | 0.5419067  | 1.8971877 | 0           | 0.003448516 |
| GO_SKELETAL_MUSCLE_CONTRACTION                                                                | 26  | -0.6537805 | -2.107689 | 0           | 0.003449147 |
| GO_ANTIGEN_PROCESSING_AND_PRESENTATION_OF_PEPTIDES_OR_POLYSACCHARIDE_ANTIGEN_VIA_MHC_CLASS_II | 76  | 0.5297659  | 1.8972112 | 0           | 0.003460175 |
| GO_NUCLEAR_MATRIX                                                                             | 52  | 0.5588168  | 1.8972205 | 0           | 0.003476497 |
| REACTOME_DEGRADATION_OF_DVL                                                                   | 32  | 0.62641627 | 1.8978139 | 0           | 0.003479275 |
| KEGG_GRAFT_VERSUS_HOST_DISEASE                                                                | 28  | 0.6411647  | 1.8958963 | 0.00155521  | 0.003490576 |
| REACTOME_NS1_MEDIATED_EFFECTS_ON_HOST_PATHWAYS                                                | 25  | 0.65897423 | 1.8961043 | 0           | 0.003497779 |
| REACTOME_INTERLEUKIN_12_FAMILY_SIGNALING                                                      | 34  | 0.6085888  | 1.8947626 | 0           | 0.003507669 |
| GO_VESICLE_ORGANIZATION                                                                       | 175 | 0.47856992 | 1.896205  | 0           | 0.003514048 |
| GO_RNA_PROCESSING                                                                             | 426 | 0.442856   | 1.8949058 | 0           | 0.0035193   |
| GO_POTASSIUM_CHANNEL_ACTIVITY                                                                 | 51  | -0.5680606 | -2.125893 | 0           | 0.003524866 |
| GO_POTASSIUM_CHANNEL_COMPLEX                                                                  | 42  | -0.5991178 | -2.122056 | 0           | 0.003563936 |
| GO_LIPID_OXIDATION                                                                            | 77  | -0.5235485 | -2.115817 | 0           | 0.003578731 |
| REACTOME_PCP_CE_PATHWAY                                                                       | 52  | 0.5639666  | 1.8933051 | 0           | 0.003589151 |

|                                                                                 |     |            |           |             |             |
|---------------------------------------------------------------------------------|-----|------------|-----------|-------------|-------------|
| GO_OLFACTORY_RECEPTOR_ACTIVITY                                                  | 17  | -0.7292876 | -2.118874 | 0           | 0.003598762 |
| GO_CELL_DIVISION                                                                | 269 | 0.4609738  | 1.8929135 | 0           | 0.003603934 |
| REACTOME_DEGRADATION_OF_GLI1_BY_THE_PROTEASOME                                  | 31  | 0.627757   | 1.8918602 | 0           | 0.003666612 |
| GO_HELICASE_ACTIVITY                                                            | 77  | 0.53406036 | 1.8911108 | 0           | 0.003676361 |
| GO_UBIQUITIN_DEPENDENT_ERAD_PATHWAY                                             | 39  | 0.59983015 | 1.8901368 | 0           | 0.003694546 |
| REACTOME_PTEN_REGULATION                                                        | 79  | 0.5221036  | 1.8894447 | 0           | 0.003721418 |
| GO_ESTABLISHMENT_OF_RNA_LOCALIZATION                                            | 105 | 0.5046963  | 1.8878573 | 0           | 0.003749233 |
| GO_POSITIVE_REGULATION_OF_TUMOR_NECROSIS_FACTOR_SUPERFAMILY_CYTOKINE_PRODUCTION | 57  | 0.5504187  | 1.8880147 | 0           | 0.003757161 |
| GO_ENDOPLASMIC_RETICULUM_TO_GOLGI_VESICLE_MEDIATED_TRANSPORT                    | 121 | 0.49002898 | 1.8885067 | 0           | 0.003760907 |
| GO_RESPONSE_TO_TYPE_I_INTERFERON                                                | 67  | 0.53988117 | 1.8870661 | 0           | 0.003766759 |
| REACTOME_SIGNALING_BY_PDGF                                                      | 44  | 0.581463   | 1.8862653 | 0           | 0.003779867 |
| REACTOME_CYCLIN_A_CDK2_ASSOCIATED_EVENTS_AT_S_PHASE_ENTRY                       | 47  | 0.5794455  | 1.8854336 | 0           | 0.003814485 |
| GO_RETROGRADE_VESICLE_MEDIATED_TRANSPORT_GOLGI_TO_ENDOPLASMIC_RETICULUM         | 58  | 0.5536157  | 1.8821996 | 0           | 0.003817279 |
| GO_SPECIFIC_GRANULE                                                             | 116 | 0.5029824  | 1.8856075 | 0           | 0.003818402 |
| REACTOME_EXPORT_OF_VIRAL_RIBONUCLEOPROTEINS_FROM_NUCLEUS                        | 22  | 0.6808843  | 1.8822062 | 0.001675042 | 0.003833118 |
| GO_REGULATION_OF_VACUOLE_ORGANIZATION                                           | 26  | 0.64494497 | 1.8824666 | 0           | 0.003836976 |
| REACTOME_MAP2K_AND_MAPK_ACTIVATION                                              | 26  | 0.6443896  | 1.8829402 | 0.001579779 | 0.003840842 |
| GO_MORPHOGENESIS_OF_A_POLARIZED_EPITHELIUM                                      | 83  | 0.5177105  | 1.8846924 | 0           | 0.00384391  |
| GO_FICOLIN_1_RICH_GRANULE                                                       | 94  | 0.5098986  | 1.8844091 | 0           | 0.003848191 |
| PID_SYNDECAN_1_PATHWAY                                                          | 33  | 0.6203615  | 1.8829516 | 0           | 0.00385698  |
| GO_DNA_TEMPLATED_TRANSCRIPTION_TERMINATION                                      | 35  | 0.61073107 | 1.8829633 | 0           | 0.003873254 |
| GO_REGULATION_OF_DEFENSE_RESPONSE_TO_VIRUS_BY_HOST                              | 18  | 0.70007545 | 1.8830498 | 0           | 0.003885571 |
| REACTOME_RRNA_PROCESSING                                                        | 90  | 0.5151297  | 1.8832854 | 0           | 0.003889719 |
| REACTOME_ASPARAGINE_N_LINKED_GLYCOSYLATION                                      | 199 | 0.47169706 | 1.8804754 | 0           | 0.003909765 |
| GO_INTERFERON_GAMMA_MEDIATED_SIGNALING_PATHWAY                                  | 59  | 0.5491767  | 1.8792824 | 0           | 0.003941015 |
| GO_INTERFERON_ALPHA_PRODUCTION                                                  | 17  | 0.70642054 | 1.878829  | 0.003430532 | 0.003952656 |
| GO_NEGATIVE_REGULATION_OF_CELL_CYCLE_PHASE_TRANSITION                           | 123 | 0.4848991  | 1.8792944 | 0           | 0.003957036 |
| GO_COTRANSLATIONAL_PROTEIN_TARGETING_TO_MEMBRANE                                | 38  | 0.59324944 | 1.8793306 | 0           | 0.003969221 |
| GO_GOLGI_ASSOCIATED_VESICLE                                                     | 101 | 0.50774896 | 1.8795881 | 0           | 0.003977628 |
| GO_SPECIFIC_GRANULE_LUMEN                                                       | 46  | 0.58112687 | 1.877564  | 0           | 0.004026565 |
| GO_RESPONSE_TO_AXON_INJURY                                                      | 45  | 0.5776555  | 1.8766334 | 0           | 0.004084429 |
| REACTOME_TRANSPORT_OF_THE_SLBP_DEPENDANT_MATURE_MRNA                            | 23  | 0.67740244 | 1.8747001 | 0           | 0.004120559 |
| REACTOME_ANTIGEN_PROCESSING_UBIQUITINATION_PROTEASOME_DEGRADATION               | 140 | 0.488334   | 1.8751174 | 0           | 0.004121433 |
| HALLMARK_DNA_REPAIR                                                             | 99  | 0.5112772  | 1.8753873 | 0           | 0.004130126 |
| GO_CYTOKINESIS                                                                  | 73  | 0.52767545 | 1.8740867 | 0           | 0.004150301 |
| GO_POSITIVE_REGULATION_OF_INTERFERON_BETA_PRODUCTION                            | 21  | 0.6785599  | 1.873405  | 0           | 0.004176021 |
| GO_ENDOPLASMIC_RETICULUM_GOLGI_INTERMEDIATE_COMPARTMENT                         | 82  | 0.5147624  | 1.8730036 | 0           | 0.00419778  |
| GO_STRUCTURAL_CONSTITUENT_OF_NUCLEAR_PORE                                       | 16  | 0.7177557  | 1.8719347 | 0.003294893 | 0.004310202 |

|                                                                              |     |            |           |             |             |
|------------------------------------------------------------------------------|-----|------------|-----------|-------------|-------------|
| GO_POSTTRANSCRIPTIONAL_REGULATION_OF_GENE_EXPRESSION                         | 295 | 0.4532142  | 1.8704273 | 0           | 0.004399218 |
| GO_TRANSLATIONAL_INITIATION                                                  | 83  | 0.51930964 | 1.8694117 | 0           | 0.004414166 |
| GO_COMPLEMENT_ACTIVATION                                                     | 69  | 0.52604246 | 1.8695115 | 0           | 0.00443121  |
| GO_MRNA_3_END_PROCESSING                                                     | 52  | 0.5586015  | 1.868813  | 0           | 0.004438072 |
| KEGG_PATHOGENIC_ESCHERICHIA_COLI_INFECTION                                   | 40  | 0.5890896  | 1.8679066 | 0.001474926 | 0.004480628 |
| REACTOME_DECTIN_1_MEDIATED_NONCANONICAL_NF_KB_SIGNALING                      | 35  | 0.60210687 | 1.8675092 | 0           | 0.004485703 |
| GO_REGULATION_OF_TELOMERE_MAINTENANCE_VIA_TELOMERE_LENGTHENING               | 27  | 0.6381587  | 1.8668054 | 0           | 0.004523834 |
| GO_NEGATIVE_REGULATION_OF_VIRAL_LIFE_CYCLE                                   | 52  | 0.55909586 | 1.8661319 | 0           | 0.004547264 |
| PID_EPHB_FWD_PATHWAY                                                         | 27  | 0.63557273 | 1.8643768 | 0           | 0.004676372 |
| REACTOME_G2_M_DNA_DAMAGE_CHECKPOINT                                          | 33  | 0.600103   | 1.8635015 | 0           | 0.004706857 |
| GO_VIRAL_GENOME_REPLICATION                                                  | 75  | 0.5184054  | 1.8636665 | 0.001414427 | 0.004713553 |
| GO_CYTOSKELETON_DEPENDENT_CYTOKINESIS                                        | 42  | 0.5828407  | 1.8630897 | 0           | 0.004714691 |
| REACTOME_REGULATION_OF_MRNA_STABILITY_BY_PROTEINS_THAT_BIND_AU_RICH_ELEMENTS | 43  | 0.5838437  | 1.8589092 | 0           | 0.005025089 |
| REACTOME_ASSEMBLY_OF_COLLAGEN_FIBRILS_AND_OTHER_MULTIMERIC_STRUCTURES        | 37  | 0.5958348  | 1.8580767 | 0           | 0.005048239 |
| GO_CELL_ADHESION_MOLECULE_BINDING                                            | 308 | 0.44531038 | 1.8584441 | 0           | 0.005049779 |
| GO_CHROMOSOME_LOCALIZATION                                                   | 36  | 0.6034446  | 1.8581824 | 0           | 0.005056079 |
| GO_PROTEIN_LOCALIZATION_TO_ENDOPLASMIC_RETICULUM                             | 57  | 0.5427779  | 1.857054  | 0           | 0.005086702 |
| GO_INTERLEUKIN_1_MEDIATED_SIGNALING_PATHWAY                                  | 54  | 0.5475092  | 1.8568149 | 0           | 0.005092901 |
| KEGG_N_GLYCAN_BIOSYNTHESIS                                                   | 32  | 0.6092356  | 1.8544052 | 0.0015625   | 0.005317153 |
| GO_BASEMENT_MEMBRANE                                                         | 55  | 0.556488   | 1.8542048 | 0           | 0.005329351 |
| REACTOME_RNA_POLYMERASE_II_TRANSCRIBES_SNRNA_GENES                           | 36  | 0.6008661  | 1.8539082 | 0           | 0.005348628 |
| REACTOME_INTERFERON_ALPHA_BETA_SIGNALING                                     | 55  | 0.56303287 | 1.852905  | 0           | 0.005406445 |
| GO_POSITIVE_REGULATION_OF_CANONICAL_WNT_SIGNALING_PATHWAY                    | 79  | 0.52052635 | 1.8513587 | 0           | 0.005505115 |
| GO_ER_TO_GOLGI_TRANSPORT_VESICLE_MEMBRANE                                    | 38  | 0.5872549  | 1.8507323 | 0           | 0.005537506 |
| REACTOME_FGFR2_ALTERNATIVE_SPLICING                                          | 18  | 0.6868312  | 1.8501486 | 0           | 0.005566221 |
| GO_NUCLEAR_ENVELOPE                                                          | 256 | 0.45048237 | 1.8480804 | 0           | 0.005675053 |
| REACTOME_COMPLEMENT_CASCADE                                                  | 53  | 0.55642897 | 1.8478991 | 0           | 0.005682517 |
| GO_SISTER_CHROMATID_SEGREGATION                                              | 77  | 0.5128881  | 1.848164  | 0           | 0.005684745 |
| REACTOME_MHC_CLASS_II_ANTIGEN_PRESENTATION                                   | 92  | 0.50618595 | 1.8482579 | 0           | 0.005694532 |
| GO_REGULATION_OF_CELLULAR_AMINO_ACID_METABOLIC_PROCESS                       | 37  | 0.59323895 | 1.8469527 | 0           | 0.005727196 |
| GO_PROTEIN_CATABOLIC_PROCESS                                                 | 474 | 0.42977566 | 1.8466984 | 0           | 0.005734279 |
| GO_HYDROLASE_ACTIVITY_ACTING_ON_ACID_ANHYDRIDES                              | 434 | 0.4332029  | 1.8456885 | 0           | 0.005792138 |
| REACTOME_STIMULI_SENSING_CHANNELS                                            | 46  | -0.5617295 | -2.070854 | 0           | 0.005794624 |
| GO_GATED_CHANNEL_ACTIVITY                                                    | 154 | -0.4565033 | -2.064953 | 0           | 0.005798019 |
| GO_MYD88_INDEPENDENT_TOLL_LIKE_RECEPTOR_SIGNALING_PATHWAY                    | 19  | 0.6828862  | 1.8459446 | 0           | 0.005798327 |
| REACTOME_HCMV_INFECTION                                                      | 56  | 0.54469913 | 1.8457997 | 0           | 0.00580191  |
| GO_VOLTAGE_GATED_POTASSIUM_CHANNEL_ACTIVITY                                  | 33  | -0.6163493 | -2.071948 | 0           | 0.005814679 |
| GO_Glutamate_Secretion                                                       | 29  | -0.6249579 | -2.060814 | 0           | 0.005896285 |
| GO_POSTSYNAPTIC_NEUROTRANSMITTER_RECEPTOR_ACTIVITY                           | 32  | -0.6101362 | -2.066263 | 0           | 0.005897857 |
| GO_LIGAND_GATED_ION_CHANNEL_ACTIVITY                                         | 69  | -0.5139356 | -2.052628 | 0           | 0.005975494 |

|                                                                                                 |     |            |           |             |             |
|-------------------------------------------------------------------------------------------------|-----|------------|-----------|-------------|-------------|
| REACTOME_RUNX1_INTERACTS_WITH_CO_FACTORS_WHOSE<br>_PRECISE_EFFECT_ON_RUNX1_TARGETS_IS_NOT_KNOWN | 19  | 0.6809651  | 1.8433292 | 0           | 0.005982167 |
| GO_ACID_SECRETION                                                                               | 78  | -0.5080401 | -2.055977 | 0           | 0.005984694 |
| GO_MITOTIC_METAPHASE_PLATE_CONGRESSION                                                          | 25  | 0.6471768  | 1.8423643 | 0.003311258 | 0.006013585 |
| PID_AVB3_INTEGRIN_PATHWAY                                                                       | 53  | 0.5482405  | 1.8420835 | 0.001459854 | 0.006019541 |
| GO_CYTOKINETIC_PROCESS                                                                          | 19  | 0.66714114 | 1.8424548 | 0.001602564 | 0.00602739  |
| GO_NUCLEAR_TRANSCRIBED_MRNA_CATABOLIC_PROCESS_E<br>XONUCLEOLYTIC                                | 17  | 0.7141822  | 1.8426106 | 0           | 0.006031435 |
| GO_NEUROTRANSMITTER_RECEPTOR_ACTIVITY                                                           | 44  | -0.5768768 | -2.053527 | 0           | 0.006032059 |
| GO_CATION_CHANNEL_ACTIVITY                                                                      | 145 | -0.4679935 | -2.04765  | 0           | 0.006062689 |
| GO_FATTY_ACID_BETA_OXIDATION                                                                    | 54  | -0.5388148 | -2.048222 | 0           | 0.006118031 |
| GO_ESTABLISHMENT_OF_PROTEIN_LOCALIZATION_TO_MEM<br>BRANE                                        | 153 | 0.47442892 | 1.8402523 | 0           | 0.006143563 |
| KEGG_FATTY_ACID_METABOLISM                                                                      | 33  | -0.593353  | -2.044572 | 0           | 0.006166234 |
| REACTOME_ASYMMETRIC_LOCALIZATION_OF_PCP_PROTEINS                                                | 35  | 0.5985943  | 1.8397968 | 0           | 0.006178202 |
| GO_PROTEIN_TARGETING_TO_VACUOLE                                                                 | 23  | 0.6520799  | 1.8394759 | 0.001589825 | 0.006190063 |
| GO_PEPTIDYL_ASPARAGINE_MODIFICATION                                                             | 24  | 0.6383832  | 1.8375975 | 0           | 0.006331488 |
| GO_RESPONSE_TO_INTERLEUKIN_12                                                                   | 30  | 0.6145372  | 1.8364034 | 0           | 0.006410575 |
| REACTOME_MITOTIC_PROMETAPHASE                                                                   | 98  | 0.49743626 | 1.8358865 | 0           | 0.006444117 |
| GO_LUMENAL_SIDE_OF_ENDOPLASMIC_RETICULUM_MEMBR<br>ANE                                           | 17  | 0.69845915 | 1.8356354 | 0           | 0.006445358 |
| GO_POSITIVE_REGULATION_OF_TOLL_LIKE_RECEPTOR_SIGNA<br>LING_PATHWAY                              | 15  | 0.72200084 | 1.8329663 | 0           | 0.006520984 |
| REACTOME_E3_UBIQUITIN_LIGASES_UBIQUITINATE_TARGET_<br>PROTEINS                                  | 26  | 0.6284933  | 1.8339481 | 0           | 0.006521221 |
| REACTOME_EPHB_MEDIATED_FORWARD_SIGNALING                                                        | 28  | 0.62424004 | 1.8333551 | 0.001517451 | 0.006526322 |
| REACTOME_INTERFERON_GAMMA_SIGNALING                                                             | 61  | 0.5396848  | 1.8340818 | 0           | 0.006536223 |
| GO_CHROMOSOME_TELOMERIC_REGION                                                                  | 67  | 0.52364796 | 1.8334553 | 0           | 0.00654446  |
| REACTOME_REGULATION_OF_RUNX2_EXPRESSION_AND_ACT<br>IVITY                                        | 41  | 0.5707504  | 1.8318979 | 0.00462963  | 0.006557421 |
| GO_SM_LIKE_PROTEIN_FAMILY_COMPLEX                                                               | 32  | 0.6050223  | 1.8315487 | 0.001607717 | 0.006558231 |
| REACTOME_GOLGI_TO_ER_RETROGRADE_TRANSPORT                                                       | 88  | 0.4982653  | 1.8319913 | 0           | 0.00656603  |
| GO_INNATE_IMMUNE_RESPONSE_ACTIVATING_CELL_SURFAC<br>E_RECEPTOR_SIGNALING_PATHWAY                | 62  | 0.53140205 | 1.8295461 | 0           | 0.006680771 |
| GO_EPHRIN_RECEPTOR_SIGNALING_PATHWAY                                                            | 59  | 0.54135126 | 1.8291824 | 0           | 0.006687345 |
| PID_PLK1_PATHWAY                                                                                | 30  | 0.6088238  | 1.8285569 | 0           | 0.006712603 |
| GO_POLYSOME                                                                                     | 35  | 0.5839743  | 1.827651  | 0.001529052 | 0.006722703 |
| GO_TRANSLATION_INITIATION_FACTOR_ACTIVITY                                                       | 28  | 0.63119227 | 1.8280749 | 0           | 0.006728399 |
| PID_AJDISS_2PATHWAY                                                                             | 32  | 0.5966162  | 1.8277698 | 0.006125575 | 0.006731694 |
| REACTOME_TRNA_PROCESSING                                                                        | 56  | 0.5288768  | 1.8268217 | 0           | 0.006781021 |
| GO_GTPASE_ACTIVITY                                                                              | 168 | 0.45870116 | 1.825746  | 0           | 0.006805653 |
| GO_VACUOLE                                                                                      | 475 | 0.42428565 | 1.8261497 | 0           | 0.006811553 |
| GO_REGULATION_OF_MRNA_CATABOLIC_PROCESS                                                         | 92  | 0.4945158  | 1.8262945 | 0           | 0.006817611 |
| GO_REGULATION_OF_MRNA_METABOLIC_PROCESS                                                         | 160 | 0.4677586  | 1.8258027 | 0           | 0.006817732 |
| GO_REGULATION_OF_CYTOKINESIS                                                                    | 40  | 0.5745705  | 1.8253152 | 0.00148368  | 0.00682058  |
| GO_CELL_CYCLE_G2_M_PHASE_TRANSITION                                                             | 136 | 0.4742028  | 1.8250588 | 0           | 0.006823469 |
| REACTOME_THE_ROLE_OF_NEF_IN_HIV_1_REPLICATION_AN<br>D_DISEASE_PATHOGENESIS                      | 21  | 0.648469   | 1.8238015 | 0           | 0.006826102 |
| REACTOME_PARASITE_INFECTION                                                                     | 53  | 0.5457241  | 1.825375  | 0           | 0.00683269  |
| GO_PROTEIN_N_LINKED_GLYCOSYLATION                                                               | 51  | 0.54905826 | 1.8238202 | 0.001443001 | 0.006843938 |

|                                                                    |     |            |           |             |             |
|--------------------------------------------------------------------|-----|------------|-----------|-------------|-------------|
| GO_NUCLEOSOME_ORGANIZATION                                         | 55  | 0.53306377 | 1.824203  | 0           | 0.00685021  |
| REACTOME_SIGNALING_BY_MET                                          | 49  | 0.5522008  | 1.8243133 | 0           | 0.006856354 |
| GO_VIRAL_LIFE_CYCLE                                                | 199 | 0.45401594 | 1.8238326 | 0           | 0.006864804 |
| GO_GOLGI_ASSOCIATED_VESICLE_MEMBRANE                               | 64  | 0.52899826 | 1.8228624 | 0           | 0.006890869 |
| GO_TRANSPORTER_COMPLEX                                             | 151 | -0.4518395 | -2.03452  | 0           | 0.006958029 |
| GO_REGULATION_OF_MULTI_ORGANISM_PROCESS                            | 450 | 0.42179498 | 1.8214469 | 0           | 0.006960702 |
| GO_REGULATION_OF_SISTER_CHROMATID_SEGREGATION                      | 29  | 0.614872   | 1.8212996 | 0.001550388 | 0.006966059 |
| GO_MRNA_TRANSPORT                                                  | 80  | 0.50641716 | 1.821655  | 0           | 0.006967046 |
| GO_HEMATOPOIETIC_STEM_CELL_DIFFERENTIATION                         | 52  | 0.54416525 | 1.8197799 | 0           | 0.00708463  |
| REACTOME_NEGATIVE_REGULATORS_OF_DDX58_IFIH1_SIGN<br>ALING          | 17  | 0.6987067  | 1.8191013 | 0.001669449 | 0.007108771 |
| GO_TRANSFERASE_ACTIVITY_TRANSFERRING_HEXOSYL_GRO<br>UPS            | 109 | 0.49100828 | 1.8192143 | 0           | 0.007118399 |
| GO_REGULATION_OF_FAT_CELL_DIFFERENTIATION                          | 69  | -0.5081091 | -2.031697 | 0           | 0.007149052 |
| REACTOME_HCMV_LATE_EVENTS                                          | 28  | 0.60612136 | 1.8181489 | 0.001594896 | 0.007194441 |
| GO_REGULATION_OF_SIGNAL_TRANSDUCTION_BY_P53_CLAS<br>S_MEDIATOR     | 95  | 0.4890825  | 1.8162502 | 0           | 0.007323433 |
| GO_CELL_CYCLE_CHECKPOINT                                           | 96  | 0.4909545  | 1.8164129 | 0           | 0.007333595 |
| REACTOME_FC_EPSILON_RECEPTOR_FCERI_SIGNALING                       | 92  | 0.48946574 | 1.8158206 | 0           | 0.007342064 |
| GO_TRANSLATION_FACTOR_ACTIVITY_RNA_BINDING                         | 40  | 0.56537193 | 1.8151447 | 0           | 0.007406066 |
| GO_INTRINSIC_APOPTOTIC_SIGNALING_PATHWAY_BY_P53_C<br>LASS_MEDIATOR | 44  | 0.5550358  | 1.8141432 | 0           | 0.007492939 |
| KEGG_RNA_DEGRADATION                                               | 24  | 0.6310946  | 1.814201  | 0           | 0.007511905 |
| REACTOME_GPCR_LIGAND_BINDING                                       | 225 | -0.4282256 | -2.026856 | 0           | 0.007644526 |
| GO_SODIUM_CHANNEL_ACTIVITY                                         | 23  | -0.6492099 | -2.024627 | 0           | 0.00772391  |
| GO_RUFFLE                                                          | 109 | 0.47944722 | 1.8110361 | 0           | 0.007736458 |
| REACTOME_CLEC7A_DECTIN_1_SIGNALING                                 | 59  | 0.5316518  | 1.8111796 | 0           | 0.00774475  |
| GO_RESPONSE_TO_VIRUS                                               | 196 | 0.44991547 | 1.8114065 | 0           | 0.007750212 |
| GO_PEPTIDE_ANTIGEN_BINDING                                         | 17  | 0.693206   | 1.8114358 | 0           | 0.007761394 |
| REACTOME_NUCLEOTIDE_EXCISION_REPAIR                                | 59  | 0.5282598  | 1.8088949 | 0           | 0.007959375 |
| REACTOME_COPI_MEDIATED_ANTEROGRADE_TRANSPORT                       | 70  | 0.51253897 | 1.8082101 | 0           | 0.008025562 |
| GO_GUANOSINE_CONTAINING_COMPOUND_METABOLIC_PR<br>OCESS             | 23  | 0.6286864  | 1.8078284 | 0           | 0.008041389 |
| GO_VESICLE_BUDDING_FROM_MEMBRANE                                   | 64  | 0.5225293  | 1.8060503 | 0           | 0.008173277 |
| GO_UBIQUITIN_LIKE_PROTEIN_LIGASE_BINDING                           | 182 | 0.4546803  | 1.8042455 | 0           | 0.008328927 |
| GO_CHROMATIN_ASSEMBLY                                              | 45  | 0.5528711  | 1.8035092 | 0           | 0.008373933 |
| GO_CELL_ACTIVATION_INVOLVED_IN_IMMUNE_RESPONSE                     | 472 | 0.42061245 | 1.8032923 | 0           | 0.008377791 |
| GO_SYMPORTER_ACTIVITY                                              | 84  | -0.4821473 | -2.018373 | 0           | 0.008394307 |
| GO_REGULATION_OF_TELOMERE_MAINTENANCE                              | 36  | 0.5705694  | 1.8025035 | 0           | 0.008409016 |
| GO_TELOMERE_MAINTENANCE_VIA_TELOMERE_LENGTHENI<br>NG               | 38  | 0.577429   | 1.8019145 | 0           | 0.008456332 |
| GO_VACUOLAR_LUMEN                                                  | 123 | 0.47284573 | 1.8011225 | 0           | 0.008485045 |
| HALLMARK_EPITHELIAL_MESENCHYMAL_TRANSITION                         | 168 | 0.4550236  | 1.8013374 | 0           | 0.00849517  |
| GO_CHROMOSOME_SEGREGATION                                          | 126 | 0.46798223 | 1.7995316 | 0           | 0.00860991  |
| GO_ACTIVATION_OF_INNATE_IMMUNE_RESPONSE                            | 186 | 0.44964296 | 1.798913  | 0           | 0.008645298 |
| REACTOME_DISEASES_OF_GLYCOSYLATION                                 | 81  | 0.49583474 | 1.798725  | 0           | 0.008653716 |
| GO_SOLUTE_SODIUM_SYMPORTER_ACTIVITY                                | 47  | -0.5480288 | -2.013069 | 0           | 0.008687062 |
| GO_NEGATIVE_REGULATION_OF_APOPTOTIC_SIGNALING_PA<br>THWAY          | 144 | 0.4604054  | 1.7969971 | 0           | 0.008863232 |
| GO_CALCIIUM_ION_IMPORT                                             | 49  | -0.5404947 | -2.007683 | 0           | 0.008914036 |

|                                                                              |     |            |           |             |             |
|------------------------------------------------------------------------------|-----|------------|-----------|-------------|-------------|
| GO_FC_RECEPTOR_SIGNALING_PATHWAY                                             | 125 | 0.46769193 | 1.7954283 | 0           | 0.009020451 |
| GO_GOLGI_ORGANIZATION                                                        | 66  | 0.5133697  | 1.7949908 | 0.002967359 | 0.009037744 |
| GO_POSITIVE_REGULATION_OF_RESPONSE_TO_CYTOKINE_STIMULUS                      | 37  | 0.5770872  | 1.7950257 | 0.003174603 | 0.009059814 |
| GO_DNA_PACKAGING                                                             | 63  | 0.520852   | 1.7943511 | 0           | 0.009100719 |
| GO_VACUOLE_ORGANIZATION                                                      | 85  | 0.49555856 | 1.7937533 | 0           | 0.009134266 |
| REACTOME_COLLAGEN_DEGRADATION                                                | 39  | 0.5639906  | 1.792166  | 0           | 0.009277105 |
| GO_NEGATIVE_REGULATION_OF_CELL_CYCLE_PROCESS                                 | 170 | 0.44966376 | 1.7922055 | 0           | 0.009299595 |
| GO_MYELOID_LEUKOCYTE_ACTIVATION                                              | 452 | 0.41957346 | 1.7911941 | 0           | 0.009331767 |
| GO_REGULATION_OF_INTRINSIC_APOPTOTIC_SIGNALING_PATHWAY_BY_P53_CLASS_MEDIATOR | 16  | 0.68527484 | 1.7912033 | 0.001636661 | 0.009354289 |
| GO_RIBONUCLEOPROTEIN_COMPLEX_BINDING                                         | 76  | 0.49924168 | 1.7903779 | 0           | 0.009382234 |
| GO_ENDOMEMBRANE_SYSTEM_ORGANIZATION                                          | 207 | 0.44345224 | 1.7896204 | 0           | 0.00942584  |
| GO_NUCLEAR_TRANSCRIBED_MRNA_CATABOLIC_PROCESS_NONSENSE_MEDIATED_DECAY        | 47  | 0.55394405 | 1.789823  | 0           | 0.009427503 |
| GO_RUFFLE_MEMBRANE                                                           | 55  | 0.5353038  | 1.7889822 | 0           | 0.009471641 |
| GO_ILKAPPA_B_KINASE_NF_KAPPA_B_SIGNALING                                     | 167 | 0.45574957 | 1.7891358 | 0           | 0.009478817 |
| REACTOME_CARDIAC_CONDUCTION                                                  | 71  | -0.5067142 | -1.998432 | 0           | 0.009507187 |
| GO_POTASSIUM_ION_IMPORT_ACROSS_PLASMA_MEMBRANE                               | 30  | -0.6027751 | -1.999279 | 0           | 0.00953116  |
| GO_DNA_REPAIR                                                                | 227 | 0.4374417  | 1.7881919 | 0           | 0.009536617 |
| GO_METAL_ION_TRANSMEMBRANE_TRANSPORTER_ACTIVITY                              | 225 | -0.4218741 | -2.000487 | 0           | 0.009582287 |
| GO_PASSIVE_TRANSMEMBRANE_TRANSPORTER_ACTIVITY                                | 203 | -0.4314342 | -1.994843 | 0           | 0.009602537 |
| REACTOME_C_TYPE_LECTIN_RECEPTORS_CLRS                                        | 80  | 0.49331492 | 1.787053  | 0           | 0.009637051 |
| GO_SMALL_NUCLEAR_RIBONUCLEOPROTEIN_COMPLEX                                   | 27  | 0.6119978  | 1.7859001 | 0           | 0.009744834 |
| GO_NUCLEAR_TRANSPORT                                                         | 192 | 0.44658393 | 1.7859852 | 0           | 0.009749915 |
| GO_B_CELL_MEDIATED_IMMUNITY                                                  | 94  | 0.4884941  | 1.7846973 | 0           | 0.009908078 |
| REACTOME_RNA_POLYMERASE_II_TRANSCRIPTION_TERMINATION                         | 35  | 0.5728947  | 1.7843198 | 0.001508296 | 0.009932973 |
| GO_PROTEIN_MODIFICATION_BY_SMALL_PROTEIN_CONJUGATION_OR_REMOVAL              | 478 | 0.41483277 | 1.7827069 | 0           | 0.010021112 |
| GO_SITE_OF_DNA_DAMAGE                                                        | 30  | 0.598659   | 1.7833688 | 0           | 0.010031325 |
| GO_ATPASE_COMPLEX                                                            | 37  | 0.5679583  | 1.7827101 | 0           | 0.010042018 |
| REACTOME_NON_INTEGRIN_MEMBRANE_ECM_INTERACTIONS                              | 43  | 0.5468725  | 1.7828861 | 0.004587156 | 0.010060555 |
| GO_GOLGI_MEMBRANE                                                            | 391 | 0.41772503 | 1.7819158 | 0           | 0.010100487 |
| GO_ATPASE_ACTIVITY                                                           | 216 | 0.43757346 | 1.7813351 | 0           | 0.010139383 |
| GO_INTRINSIC_APOPTOTIC_SIGNALING_PATHWAY                                     | 176 | 0.44694042 | 1.7808465 | 0           | 0.010178072 |
| GO_LOW_DENSITY_LIPOPROTEIN_RECEPTOR_PARTICLE_METABOLIC_PROCESS               | 16  | 0.6809161  | 1.7796916 | 0.005154639 | 0.010305889 |
| GO_SIGNAL_TRANSDUCTION_BY_P53_CLASS_MEDIATOR                                 | 148 | 0.45582724 | 1.7792293 | 0           | 0.010358984 |
| GO_DICARBOXYLIC_ACID_TRANSPORT                                               | 59  | -0.517043  | -1.987075 | 0           | 0.010363461 |
| PID_ECADHERIN_NASCENT_AJ_PATHWAY                                             | 28  | 0.6010157  | 1.7786206 | 0           | 0.010421738 |
| GO_G_PROTEIN_COUPLED_AMINE_RECEPTOR_ACTIVITY                                 | 21  | -0.6594841 | -1.985054 | 0           | 0.010434528 |
| GO_DICARBOXYLIC_ACID_TRANSMEMBRANE_TRANSPORTER_ACTIVITY                      | 22  | -0.6707228 | -1.987805 | 0           | 0.010474707 |
| REACTOME_DNA_REPAIR                                                          | 147 | 0.45437124 | 1.7767034 | 0           | 0.010630131 |
| GO_ATP_DEPENDENT_CHROMATIN_REMODELING                                        | 34  | 0.57571346 | 1.7759396 | 0           | 0.01071626  |
| GO_ACTIVATION_OF_IMMUNE_RESPONSE                                             | 402 | 0.4169537  | 1.7753837 | 0           | 0.010762843 |
| PID_ATR_PATHWAY                                                              | 21  | 0.65336436 | 1.7750591 | 0.004830918 | 0.010774892 |
| REACTOME_GENE_SILENCING_BY_RNA                                               | 41  | 0.55434185 | 1.7739561 | 0.003134796 | 0.010901469 |

|                                                                                   |     |            |           |             |             |
|-----------------------------------------------------------------------------------|-----|------------|-----------|-------------|-------------|
| GO_REGULATION_OF_PROTEIN_MODIFICATION_BY_SMALL_P<br>ROTEIN_CONJUGATION_OR_REMOVAL | 118 | 0.46113467 | 1.7735131 | 0           | 0.010934996 |
| GO_SNRNA_TRANSCRIPTION                                                            | 36  | 0.56791955 | 1.7724231 | 0           | 0.011072869 |
| GO_CELLULAR_RESPONSE_TO_DSRNA                                                     | 17  | 0.6689603  | 1.7717274 | 0           | 0.011178891 |
| GO_METAPHASE_PLATE_CONGRESSION                                                    | 30  | 0.586914   | 1.7715234 | 0.00152439  | 0.01118024  |
| GO_P38MAPK_CASCADE                                                                | 27  | -0.6287217 | -1.978744 | 0           | 0.011215203 |
| GO_ORGANELLE_FUSION                                                               | 61  | 0.51829326 | 1.7707655 | 0           | 0.01122475  |
| REACTOME_ABC_FAMILY_PROTEINS_MEDIATED_TRANSPORT                                   | 54  | 0.5239951  | 1.770846  | 0.001408451 | 0.011242895 |
| GO_VESICLE_LUMEN                                                                  | 235 | 0.43353233 | 1.7709527 | 0           | 0.011244263 |
| GO_VIRAL_GENE_EXPRESSION                                                          | 95  | 0.48211    | 1.7702475 | 0           | 0.01126185  |
| GO_CHROMATIN_ASSEMBLY_OR_DISASSEMBLY                                              | 58  | 0.5188883  | 1.7684047 | 0.001449275 | 0.011480192 |
| REACTOME_MITOTIC_G2_G2_M_PHASES                                                   | 107 | 0.47269663 | 1.7676038 | 0           | 0.011599579 |
| REACTOME_POTASSIUM_CHANNELS                                                       | 50  | -0.5330643 | -1.972622 | 0           | 0.011691293 |
| GO_VOLTAGE_GATED_CALCIUM_CHANNEL_COMPLEX                                          | 21  | -0.6624246 | -1.973917 | 0           | 0.011691555 |
| HALLMARK_MTORC1_SIGNALING                                                         | 150 | 0.44893712 | 1.766622  | 0           | 0.011697046 |
| GO_REGULATION_OF_RESPONSE_TO_BIOTIC_STIMULUS                                      | 307 | 0.42305133 | 1.7666273 | 0           | 0.011723253 |
| GO_VESICLE_TARGETING                                                              | 56  | 0.5221358  | 1.7650622 | 0           | 0.011926611 |
| GO_GUANYL_NUCLEOTIDE_BINDING                                                      | 199 | 0.43624088 | 1.7647558 | 0           | 0.011940029 |
| REACTOME_COLLAGEN_FORMATION                                                       | 55  | 0.53296125 | 1.7627363 | 0           | 0.011999284 |
| GO_REGULATION_OF_GENE_SILENCING                                                   | 63  | 0.50433064 | 1.7639235 | 0.001420455 | 0.01200225  |
| REACTOME_TRNA_AMINOACYLATION                                                      | 15  | 0.68736726 | 1.7632548 | 0.00317965  | 0.012003769 |
| REACTOME_NONSENSE_MEDIATED_DECAY_NMD                                              | 46  | 0.5276515  | 1.7634469 | 0           | 0.012004497 |
| PID_TOLL_ENDOGENOUS_PATHWAY                                                       | 16  | 0.6944157  | 1.7640837 | 0           | 0.012021848 |
| PID_FAK_PATHWAY                                                                   | 39  | 0.54851586 | 1.7627385 | 0.00154321  | 0.012027853 |
| GO_GTP_METABOLIC_PROCESS                                                          | 16  | 0.6677885  | 1.7634536 | 0.001694915 | 0.012033355 |
| GO_MITOTIC_SISTER_CHROMATID_SEGREGATION                                           | 64  | 0.50382304 | 1.7635888 | 0.001416431 | 0.012038908 |
| GO_PROTEIN_MODIFICATION_BY_SMALL_PROTEIN_CONJUGA<br>TION                          | 407 | 0.4159966  | 1.7627602 | 0           | 0.012056559 |
| GO_NCRNA_TRANSCRIPTION                                                            | 55  | 0.5148364  | 1.762057  | 0           | 0.012057187 |
| GO_P_BODY                                                                         | 44  | 0.5388193  | 1.7621839 | 0.003134796 | 0.012069709 |
| GO_PROTEASE_BINDING                                                               | 79  | 0.49535847 | 1.7607242 | 0           | 0.01219492  |
| KEGG_RETINOL_METABOLISM                                                           | 32  | -0.5837947 | -1.967608 | 0           | 0.012196162 |
| GO_CAJAL_BODY                                                                     | 26  | 0.5921033  | 1.760756  | 0.006359301 | 0.012209863 |
| GO_NUCLEAR_PERIPHERY                                                              | 63  | 0.5100437  | 1.7602345 | 0           | 0.012230317 |
| REACTOME_ABC_TRANSPORTER_DISORDERS                                                | 41  | 0.55383444 | 1.7593637 | 0.001453488 | 0.012322324 |
| GO_NUCLEOLUS                                                                      | 471 | 0.4081805  | 1.7590386 | 0           | 0.012338801 |
| GO_TUMOR_NECROSIS_FACTOR_BIOSYNTHETIC_PROCESS                                     | 17  | 0.6738867  | 1.757512  | 0.006079027 | 0.012525509 |
| GO_CYTOPLASMIC_TRANSLATIONAL_INITIATION                                           | 20  | 0.63957566 | 1.7566371 | 0.003236246 | 0.012596252 |
| GO_MEMBRANE_DOCKING                                                               | 89  | 0.48246184 | 1.7566996 | 0.001390821 | 0.012620982 |
| GO_POSITIVE_REGULATION_OF_TELOMERE_MAINTENANCE                                    | 25  | 0.61126244 | 1.7556375 | 0.004580153 | 0.012726787 |
| GO_REGULATION_OF_INTRINSIC_APOPTOTIC_SIGNALING_PA<br>THWAY                        | 100 | 0.47586623 | 1.7550547 | 0           | 0.012734912 |
| REACTOME_ER_TO_GOLGI_ANTEROGRADE_TRANSPORT                                        | 100 | 0.47496897 | 1.7553709 | 0           | 0.012740037 |
| GO_TOXIN_TRANSPORT                                                                | 22  | 0.6277943  | 1.75513   | 0.0015625   | 0.012753147 |
| GO_CATION_TRANSMEMBRANE_TRANSPORTER_ACTIVITY                                      | 316 | -0.4083999 | -1.959679 | 0           | 0.012838787 |
| PID_HNF3B_PATHWAY                                                                 | 35  | -0.5697399 | -1.958176 | 0           | 0.012892064 |
| GO_REGULATION_OF_CARDIOCYTE_DIFFERENTIATION                                       | 24  | -0.6272429 | -1.956896 | 0           | 0.012944405 |
| GO_BASEMENT_MEMBRANE_ORGANIZATION                                                 | 21  | 0.6337186  | 1.7531576 | 0           | 0.012991881 |
| GO_NIK_NF_KAPPAB_SIGNALING                                                        | 102 | 0.4738157  | 1.7533185 | 0           | 0.013001549 |
| GO_AMINO_ACID_ACTIVATION                                                          | 18  | 0.6536456  | 1.7534579 | 0.001631321 | 0.013004577 |

|                                                                         |     |            |           |             |             |
|-------------------------------------------------------------------------|-----|------------|-----------|-------------|-------------|
| GO_ORGANIC_ACID_TRANSMEMBRANE_TRANSPORTER_ACTIVITY                      | 78  | -0.4894358 | -1.960081 | 0           | 0.013021871 |
| GO_RAS_PROTEIN_SIGNAL_TRANSDUCTION                                      | 235 | 0.42750987 | 1.7512707 | 0           | 0.013270322 |
| REACTOME_INTRA_GOLGI_AND_RETROGRADE_GOLGI_TO_ER_TRAFFIC                 | 121 | 0.45655683 | 1.7508001 | 0           | 0.013324032 |
| GO_NUCLEAR_CHROMOSOME_SEGREGATION                                       | 98  | 0.47713494 | 1.7505443 | 0           | 0.013331281 |
| REACTOME_RHO_GTPASES_ACTIVATE_WASPS_AND_WAVES                           | 25  | 0.6067365  | 1.749229  | 0.007824726 | 0.013514102 |
| REACTOME_REGULATION_OF_GLUCOKINASE_BY_GLUCOKINASE_REGULATORY_PROTEIN    | 20  | 0.6425431  | 1.7483464 | 0           | 0.013615223 |
| REACTOME_SIGNALING_BY_PDGFR_IN_DISEASE                                  | 16  | 0.6703067  | 1.7480292 | 0.003344482 | 0.013639368 |
| GO_RESPONSE_TO_INTERFERON_GAMMA                                         | 128 | 0.45636183 | 1.7474675 | 0           | 0.013735624 |
| GO_NEGATIVE_REGULATION_OF_MITOTIC_CELL_CYCLE                            | 166 | 0.44090447 | 1.7469733 | 0           | 0.013776857 |
| GO_POSITIVE_REGULATION_OF_TELOMERE_MAINTENANCE_VIA_TELOMERE_LENGTHENING | 19  | 0.64715266 | 1.7457952 | 0.003424658 | 0.013944047 |
| GO_POSITIVE_REGULATION_OF_VIRAL_PROCESS                                 | 60  | 0.51174635 | 1.7453371 | 0           | 0.013977105 |
| GO_NCRNA_PROCESSING                                                     | 159 | 0.44640335 | 1.7454237 | 0           | 0.013995287 |
| GO_MULTIVESICULAR_BODY_SORTING_PATHWAY                                  | 17  | 0.6687427  | 1.7446834 | 0.003257329 | 0.013996986 |
| PID_LIS1_PATHWAY                                                        | 20  | 0.6417908  | 1.744714  | 0.008223685 | 0.014023793 |
| BIOCARTA_CERAMIDE_PATHWAY                                               | 17  | 0.66079533 | 1.7424427 | 0.006655574 | 0.014212498 |
| GO_RESPONSE_TO_ENDOPLASMIC_RETICULUM_STRESS                             | 157 | 0.44248495 | 1.7432339 | 0           | 0.014213327 |
| GO_REGULATION_OF_CHROMOSOME_SEGREGATION                                 | 38  | 0.54831904 | 1.7427428 | 0           | 0.01422164  |
| GO_NCRNA_METABOLIC_PROCESS                                              | 191 | 0.43509334 | 1.7429261 | 0           | 0.014229369 |
| GO_REGULATION_OF_CHROMOSOME_SEPARATION                                  | 26  | 0.6012138  | 1.7424755 | 0.001618123 | 0.014239467 |
| KEGG_PROXIMAL_TUBULE_BICARBONATE_RECLAMATION                            | 18  | -0.6620701 | -1.947086 | 0           | 0.014260383 |
| KEGG_VALINE_LEUCINE_AND_ISOLEUCINE_DEGRADATION                          | 38  | -0.5530377 | -1.94283  | 0           | 0.014410847 |
| GO_INORGANIC_ION_IMPORT_ACROSS_PLASMA_MEMBRANE                          | 54  | -0.5246319 | -1.943704 | 0           | 0.014456393 |
| GO_PRECATALYTIC_SPLICEOSOME                                             | 27  | 0.5880922  | 1.7401721 | 0.001615509 | 0.014553537 |
| REACTOME_CLASS_A_1_RHODOPSIN_LIKE_RECEPTORS                             | 168 | -0.4233533 | -1.944704 | 0           | 0.014579391 |
| GO_ATPASE_ACTIVITY_COUPLED                                              | 148 | 0.4480012  | 1.7391924 | 0           | 0.014649    |
| GO_VESICLE_TARGETING_TO_FROM_OR_WITHIN_GOLGI                            | 43  | 0.53494215 | 1.7392931 | 0           | 0.014666165 |
| REACTOME_MAPK6_MAPK4_SIGNALING                                          | 48  | 0.5298782  | 1.7393118 | 0.00143472  | 0.01469177  |
| GO_PROTEIN_POLYUBIQUITINATION                                           | 146 | 0.44435558 | 1.7387352 | 0           | 0.01470172  |
| REACTOME_PHASE_0_RAPID_DEPOLARISATION                                   | 23  | -0.6354948 | -1.939331 | 0           | 0.014937999 |
| GO_GLYCOSYLATION                                                        | 142 | 0.44688293 | 1.7367208 | 0           | 0.015034664 |
| GO_PROTEIN_SUMOYLATION                                                  | 46  | 0.5321461  | 1.7365308 | 0           | 0.015037753 |
| GO_U2_TYPE_CATALYTIC_STEP_2_SPLICEOSOME                                 | 16  | 0.66618425 | 1.7368274 | 0.008183306 | 0.015046124 |
| GO_REGULATION_OF_RECEPTOR_BINDING                                       | 16  | 0.6767955  | 1.7360697 | 0.005008347 | 0.015107743 |
| KEGG_TYPE_I_DIABETES_MELLITUS                                           | 28  | 0.58333224 | 1.7353612 | 0.004893964 | 0.0151646   |
| GO_PROTEIN_TARGETING_TO_MEMBRANE                                        | 79  | 0.4870127  | 1.7356311 | 0           | 0.015167031 |
| GO_CYTOPLASMIC_TRANSLATION                                              | 44  | 0.5333337  | 1.7354723 | 0.002894356 | 0.015172117 |
| GO_REGULATION_OF_RESPONSE_TO_CYTOKINE_STIMULUS                          | 110 | 0.46352133 | 1.7348394 | 0           | 0.015231791 |
| GO_BONE_CELL_DEVELOPMENT                                                | 19  | 0.63600284 | 1.7345978 | 0.009966778 | 0.015255389 |
| BIOCARTA_ECM_PATHWAY                                                    | 15  | 0.6832841  | 1.7334288 | 0.008474576 | 0.015359506 |
| KEGG_CELL_CYCLE                                                         | 73  | 0.48636365 | 1.7335889 | 0           | 0.015373501 |
| REACTOME_COLLAGEN_CHAIN_TRIMERIZATION                                   | 24  | 0.5986499  | 1.7325429 | 0.001636661 | 0.015434111 |
| GO_RECEPTOR_CATABOLIC_PROCESS                                           | 22  | 0.61794406 | 1.7327867 | 0.004724409 | 0.015435969 |
| REACTOME_INTERLEUKIN_12_SIGNALING                                       | 28  | 0.5887341  | 1.7319539 | 0.004769475 | 0.015475171 |
| REACTOME_TRANSCRIPTIONAL_REGULATION_BY_E2F6                             | 16  | 0.65509546 | 1.7320114 | 0.009852217 | 0.015501703 |



|                                                                                                                                                                                                        |     |            |           |             |             |
|--------------------------------------------------------------------------------------------------------------------------------------------------------------------------------------------------------|-----|------------|-----------|-------------|-------------|
| REACTOME_INTERCONVERSION_OF_NUCLEOTIDE_DI_AND_T<br>RIPHOSPHATES                                                                                                                                        | 21  | 0.629709   | 1.7310199 | 0.004862237 | 0.015560486 |
| GO_POSITIVE_REGULATION_OF_MULTI_ORGANISM_PROCESS                                                                                                                                                       | 307 | 0.41768324 | 1.7312092 | 0           | 0.015562627 |
| GO_REGULATION_OF_TRANSCRIPTION_FROM_RNA_POLYME<br>RASE_II_PROMOTER_IN_RESPONSE_TO_HYPOXIA                                                                                                              | 40  | 0.5384263  | 1.7313086 | 0.003081664 | 0.015578985 |
| GO_TRANSMISSION_OF_NERVE_IMPULSE                                                                                                                                                                       | 41  | -0.5515648 | -1.931404 | 0           | 0.015659241 |
| REACTOME_GENE_AND_PROTEIN_EXPRESSION_BY_JAK_STAT<br>_SIGNALING_AFTER_INTERLEUKIN_12_STIMULATION                                                                                                        | 23  | 0.6056284  | 1.7296625 | 0.0048      | 0.015754255 |
| REACTOME_INFECTIOUS_DISEASE                                                                                                                                                                            | 387 | 0.40881598 | 1.7296788 | 0           | 0.015787076 |
| GO_POTASSIUM_ION_HOMEOSTASIS                                                                                                                                                                           | 24  | -0.6147937 | -1.93162  | 0.002906977 | 0.015807616 |
| REACTOME_DOWNSTREAM_SIGNAL_TRANSDUCTION                                                                                                                                                                | 19  | 0.64248043 | 1.7288169 | 0.008130081 | 0.015891338 |
| GO_REGULATION_OF_DEFENSE_RESPONSE_TO_VIRUS_BY_VI<br>RUS                                                                                                                                                | 22  | 0.61665046 | 1.7277538 | 0.004854369 | 0.016018603 |
| REACTOME_VOLTAGE_GATED_POTASSIUM_CHANNELS                                                                                                                                                              | 15  | -0.7012827 | -1.931988 | 0           | 0.016028043 |
| REACTOME_GLYCOSPHINGOLIPID_METABOLISM                                                                                                                                                                  | 28  | 0.5821744  | 1.7277792 | 0           | 0.016049735 |
| GO_DNA_REPLICATION_INDEPENDENT_NUCLEOSOME_ORGA<br>NIZATION                                                                                                                                             | 21  | 0.6217025  | 1.7273457 | 0.012461059 | 0.016077565 |
| GO_XENOBIOTIC_METABOLIC_PROCESS                                                                                                                                                                        | 80  | -0.4829398 | -1.926424 | 0           | 0.016233938 |
| GO_TRANSLATION_REGULATOR_ACTIVITY_NUCLEIC_ACID_BI<br>NDING                                                                                                                                             | 45  | 0.53880244 | 1.7256159 | 0           | 0.016394556 |
| GO_REGULATION_OF_TYPE_I_INTERFERON_MEDIATED_SIGN<br>ALING_PATHWAY                                                                                                                                      | 23  | 0.609104   | 1.7249275 | 0.003058104 | 0.016500529 |
| GO_VESICLE_DOCKING                                                                                                                                                                                     | 33  | 0.55803055 | 1.7244985 | 0.004511278 | 0.016558295 |
| REACTOME_NGF_STIMULATED_TRANSCRIPTION                                                                                                                                                                  | 27  | -0.5930063 | -1.923575 | 0           | 0.016577661 |
| REACTOME_MRNA_CAPPING                                                                                                                                                                                  | 17  | 0.64751685 | 1.7238563 | 0.006557377 | 0.01665956  |
| GO_POSITIVE_REGULATION_OF_RESPONSE_TO_BIOTIC_STIM<br>ULUS                                                                                                                                              | 229 | 0.42312756 | 1.7229513 | 0           | 0.016774211 |
| GO_LIGAND_GATED_CATION_CHANNEL_ACTIVITY                                                                                                                                                                | 54  | -0.5173893 | -1.915744 | 0           | 0.016958414 |
| GO_OXIDOREDUCTASE_ACTIVITY_ACTING_ON_PAIRED_DONO<br>RS_WITH_INCORPORATION_OR_REDUCTION_OF_MOLECULA<br>R_OXYGEN_REDUCED_FLAVIN_OR_FLAVOPROTEIN_AS_ONE_<br>DONOR_AND_INCORPORATION_OF_ONE_ATOM_OF_OXYGEN | 22  | -0.6217964 | -1.916672 | 0.002688172 | 0.017066084 |
| KEGG_BETA_ALANINE_METABOLISM                                                                                                                                                                           | 18  | -0.6627562 | -1.918581 | 0           | 0.01719691  |
| REACTOME_N_GLYCAN_TRIMMING_IN_THE_ER_AND_CALNE<br>XIN_CALRETICULIN_CYCLE                                                                                                                               | 18  | 0.64604336 | 1.7206186 | 0.006622517 | 0.017229512 |
| GO_NITRIC_OXIDE_MEDIATED_SIGNAL_TRANSDUCTION                                                                                                                                                           | 19  | -0.6514934 | -1.916926 | 0.004819277 | 0.01728588  |
| REACTOME_DEGRADATION_OF_THE_EXTRACELLULAR_MATRI<br>X                                                                                                                                                   | 85  | 0.48000723 | 1.7197838 | 0           | 0.017340615 |
| GO_SINGLE_STRANDED_RNA_BINDING                                                                                                                                                                         | 44  | 0.53809756 | 1.7189991 | 0.001552795 | 0.017451486 |
| GO_HUMORAL_IMMUNE_RESPONSE_MEDIATED_BY_CIRCUL<br>ATING_IMMUNOGLOBULIN                                                                                                                                  | 53  | 0.5068446  | 1.7182628 | 0.001461988 | 0.017534386 |
| GO_INTERSTRAND_CROSS_LINK_REPAIR                                                                                                                                                                       | 19  | 0.63145274 | 1.7179912 | 0.00952381  | 0.017546166 |
| GO_NUCLEOBASE_CONTAINING_COMPOUND_TRANSPORT                                                                                                                                                            | 129 | 0.45157146 | 1.7176092 | 0           | 0.017585253 |
| GO_TERTIARY_GRANULE                                                                                                                                                                                    | 113 | 0.46271443 | 1.716638  | 0           | 0.017760845 |
| REACTOME_CELLULAR_RESPONSES_TO_EXTERNAL_STIMULI                                                                                                                                                        | 315 | 0.41108096 | 1.7141651 | 0           | 0.018239137 |
| GO_NUCLEOCYTOPLASMIC_CARRIER_ACTIVITY                                                                                                                                                                  | 15  | 0.67553693 | 1.7135463 | 0.006688963 | 0.018356549 |
| GO_NEGATIVE_REGULATION_OF_EXTRINSIC_APOPTOTIC_SIG<br>NALING_PATHWAY_VIA_DEATH_DOMAIN_RECEPTORS                                                                                                         | 22  | 0.60550666 | 1.7128808 | 0.006451613 | 0.018456038 |

|                                                                                 |     |            |           |             |             |
|---------------------------------------------------------------------------------|-----|------------|-----------|-------------|-------------|
| GO_PROTEIN_EXIT_FROM_ENDOPLASMIC_RETICULUM                                      | 24  | 0.601294   | 1.7126548 | 0.004862237 | 0.018477479 |
| GO_IMPORT_ACROSS_PLASMA_MEMBRANE                                                | 78  | -0.4795016 | -1.905305 | 0           | 0.018506454 |
| GO_PROTEIN_HETEROTETRAMERIZATION                                                | 17  | 0.64995116 | 1.7117902 | 0.011437909 | 0.018585866 |
| GO_CELLULAR_RESPONSE_TO_INTERFERON_BETA                                         | 15  | 0.67077935 | 1.7111217 | 0.009771987 | 0.018699616 |
| GO_MRNA_BINDING                                                                 | 118 | 0.44932246 | 1.7105246 | 0.001321004 | 0.018741032 |
| KEGG_AUTOIMMUNE_THYROID_DISEASE                                                 | 33  | 0.5601105  | 1.7106105 | 0.003184713 | 0.01877049  |
| REACTOME_PROCESSING_OF_DNA_DOUBLE_STRAND_BREAK_ENDS                             | 31  | 0.5698096  | 1.7098862 | 0.001470588 | 0.018797537 |
| GO_PURINE_NUCLEOSIDE_TRIPHOSPHATE_METABOLIC_PROCESS                             | 39  | 0.53939635 | 1.7099609 | 0.00304414  | 0.018825071 |
| NABA_BASEMENT_MEMBRANES                                                         | 21  | 0.6078259  | 1.7069365 | 0.009819968 | 0.019428344 |
| GO_GENE_SILENCING                                                               | 110 | 0.45481566 | 1.7066565 | 0           | 0.019451313 |
| NABA_COLLAGENS                                                                  | 24  | 0.5986499  | 1.7056332 | 0.007849294 | 0.01965904  |
| REACTOME_DEADENYLATION_DEPENDENT_MRNA_DECAY                                     | 22  | 0.6013801  | 1.7042595 | 0.001607717 | 0.01988263  |
| GO_EXTRACELLULAR_MATRIX_STRUCTURAL_CONSTITUENT_CONFERRING_TENSILE_STRENGTH      | 24  | 0.5986499  | 1.7038566 | 0.006420546 | 0.01989983  |
| GO_LAMELLIPODIUM                                                                | 123 | 0.4531386  | 1.7043512 | 0           | 0.019900668 |
| GO_TOLL_LIKE_RECEPTOR_SIGNALING_PATHWAY                                         | 88  | 0.47068122 | 1.704024  | 0           | 0.0199026   |
| GO_POSITIVE_REGULATION_OF_VIRAL_LIFE_CYCLE                                      | 32  | 0.56327355 | 1.7034574 | 0.001538462 | 0.019953797 |
| GO_POSTREPLICATION_REPAIR                                                       | 26  | 0.5860348  | 1.7032616 | 0.003267974 | 0.01996215  |
| GO_TRANSFERASE_ACTIVITY_TRANSFERRING_GLYCOSYL_GROUPS                            | 139 | 0.44457763 | 1.7026819 | 0.00132626  | 0.020010734 |
| BIOCARTA_HIVNEF_PATHWAY                                                         | 44  | 0.5249399  | 1.7027303 | 0.001466276 | 0.020040043 |
| GO_TRNA_METABOLIC_PROCESS                                                       | 73  | 0.4844348  | 1.7021017 | 0           | 0.020104975 |
| GO_POSITIVE_REGULATION_OF_DEFENSE_RESPONSE                                      | 293 | 0.4090068  | 1.7009804 | 0           | 0.02033738  |
| REACTOME_INITIAL_TRIGGERING_OF_COMPLEMENT                                       | 26  | 0.5864486  | 1.7003121 | 0.004909984 | 0.020449445 |
| GO_ORGANELLE_MEMBRANE_FUSION                                                    | 49  | 0.51423204 | 1.7001039 | 0           | 0.020464197 |
| GO_TRANSFORMING_GROWTH_FACTOR_BETA_PRODUCTION                                   | 31  | 0.5630284  | 1.699374  | 0.001652893 | 0.020620687 |
| REACTOME_EXTRACELLULAR_MATRIX_ORGANIZATION                                      | 193 | 0.4239264  | 1.6988356 | 0           | 0.020722328 |
| GO_REGULATION_OF_PROTEIN_STABILITY                                              | 167 | 0.42752174 | 1.6985135 | 0           | 0.020758731 |
| KEGG_CALCIIUM_SIGNALING_PATHWAY                                                 | 108 | -0.4487457 | -1.892511 | 0           | 0.02094582  |
| GO_RIBONUCLEOSIDE_TRIPHOSPHATE_METABOLIC_PROCESS                                | 38  | 0.53793985 | 1.6972722 | 0           | 0.020990808 |
| GO_SOLUTE_CATION_SYMPORTER_ACTIVITY                                             | 64  | -0.4845229 | -1.890833 | 0           | 0.021239303 |
| REACTOME_SIGNALING_BY_NOTCH                                                     | 99  | 0.45534703 | 1.6960253 | 0           | 0.021281358 |
| REACTOME_RRNA_MODIFICATION_IN_THE_NUCLEUS_AND_CYTOSOL                           | 32  | 0.5505299  | 1.6957664 | 0.004477612 | 0.021307435 |
| GO_DNA_DAMAGE_RESPONSE_SIGNAL_TRANSDUCTION_BY_P53_CLASS_MEDIATOR                | 62  | 0.48594296 | 1.6953589 | 0.001451379 | 0.021388477 |
| GO_COPI_COATED_VESICLE                                                          | 16  | 0.6485811  | 1.6950135 | 0.006734007 | 0.021452736 |
| GO_RNA_CAPPING                                                                  | 17  | 0.6475169  | 1.6947619 | 0.006700167 | 0.021472767 |
| GO_TELOMERE_ORGANIZATION                                                        | 69  | 0.4857019  | 1.6943413 | 0.001412429 | 0.021531219 |
| REACTOME_SUMOYLATION                                                            | 96  | 0.4587807  | 1.6936482 | 0.001345895 | 0.021563215 |
| REACTOME_SIGNALLING_TO_ERKS                                                     | 23  | 0.59199286 | 1.6937667 | 0.011589404 | 0.021579985 |
| REACTOME_INTRINSIC_PATHWAY_FOR_APOPTOSIS                                        | 30  | 0.5621093  | 1.6937835 | 0.006163328 | 0.021616805 |
| GO_CONDENSED_CHROMOSOME                                                         | 96  | 0.46394628 | 1.6928157 | 0           | 0.021718862 |
| GO_REGULATION_OF_CENTROSOME_CYCLE                                               | 24  | 0.58459514 | 1.6916298 | 0.011475409 | 0.021852097 |
| GO_NUCLEOSIDE_TRIPHOSPHATE_METABOLIC_PROCESS                                    | 53  | 0.4963559  | 1.6916976 | 0.001470588 | 0.021881865 |
| GO_REGULATION_OF_OXIDATIVE_STRESS_INDUCED_INTRINSIC_APOPTOTIC_SIGNALING_PATHWAY | 17  | 0.6444537  | 1.6917005 | 0.003418803 | 0.021922614 |
| GO_DNA_METABOLIC_PROCESS                                                        | 405 | 0.3991285  | 1.6907427 | 0           | 0.022018807 |

|                                                                                           |     |            |           |             |             |
|-------------------------------------------------------------------------------------------|-----|------------|-----------|-------------|-------------|
| PID_PI3KCI_PATHWAY                                                                        | 39  | 0.52598506 | 1.6895235 | 0.002985075 | 0.022247571 |
| GO_LIPOPOLYSACCHARIDE_BINDING                                                             | 18  | 0.6298577  | 1.6888518 | 0.009646302 | 0.022378767 |
| GO_GENE_SILENCING_BY_RNA                                                                  | 79  | 0.47443578 | 1.6883811 | 0.001440922 | 0.022450492 |
| REACTOME_DISEASES_OF_SIGNAL_TRANSDUCTION_BY_GROWTH_FACTOR_RECEPTORS_AND_SECOND_MESSENGERS | 207 | 0.4207989  | 1.6880056 | 0           | 0.022502307 |
| REACTOME_SIGNALING_BY_RHO_GTPASES                                                         | 210 | 0.4214268  | 1.6874179 | 0           | 0.022565998 |
| GO_REGULATION_OF_CENTROSOME_DUPLICATION                                                   | 18  | 0.62292963 | 1.687546  | 0.014851485 | 0.022571754 |
| GO_ENDOSOMAL_TRANSPORT                                                                    | 96  | 0.45409355 | 1.6871569 | 0           | 0.0225868   |
| REACTOME_NERVOUS_SYSTEM_DEVELOPMENT                                                       | 335 | 0.3998638  | 1.6865526 | 0           | 0.022633541 |
| PID_S1P_S1P1_PATHWAY                                                                      | 17  | 0.6518664  | 1.6865951 | 0.00499168  | 0.022667758 |
| GO_PERIKARYON                                                                             | 71  | -0.4791151 | -1.882953 | 0           | 0.022792943 |
| HALLMARK_UNFOLDED_PROTEIN_RESPONSE                                                        | 74  | 0.47660503 | 1.6844838 | 0.001388889 | 0.023040581 |
| GO_APOPTOTIC_SIGNALING_PATHWAY                                                            | 364 | 0.3991009  | 1.684532  | 0           | 0.023070004 |
| GO_NEGATIVE_REGULATION_OF_CHROMOSOME_ORGANIZATION                                         | 62  | 0.48924989 | 1.684619  | 0.002840909 | 0.02308717  |
| GO_RRNA_METABOLIC_PROCESS                                                                 | 100 | 0.45152923 | 1.6835526 | 0           | 0.0232767   |
| GO_REGULATION_OF_CELLULAR_AMINE_METABOLIC_PROCESSES                                       | 49  | 0.5033928  | 1.6820898 | 0           | 0.023506187 |
| HALLMARK_COMPLEMENT                                                                       | 163 | 0.42778715 | 1.6821182 | 0           | 0.02353976  |
| BIOCARTA_CASPASE_PATHWAY                                                                  | 19  | 0.62606686 | 1.6821775 | 0.0046875   | 0.023568198 |
| PID_INTEGRIN1_PATHWAY                                                                     | 52  | 0.50707597 | 1.6811935 | 0.001533742 | 0.023590159 |
| PID_P53_REGULATION_PATHWAY                                                                | 30  | 0.55441314 | 1.6809931 | 0.004823151 | 0.023603583 |
| GO_ENDOCYTIC_VESICLE                                                                      | 175 | 0.42317402 | 1.6812478 | 0           | 0.02361849  |
| GO_IMMUNOGLOBULIN_PRODUCTION_INVOLVED_IN_IMMUNOGLOBULIN_MEDIATED_IMMUNE_RESPONSE          | 28  | 0.5665006  | 1.6813344 | 0.003344482 | 0.023629412 |
| GO_CHROMATIN_REMODELING                                                                   | 66  | 0.48178187 | 1.680629  | 0.001464129 | 0.02363598  |
| GO_ANTIGEN_RECEPTOR_MEDIATED_SIGNALING_PATHWAY                                            | 165 | 0.42238617 | 1.6814342 | 0           | 0.023642132 |
| GO_SIGNAL_TRANSDUCTION_IN_RESPONSE_TO_DNA_DAMAGE                                          | 73  | 0.47741774 | 1.6800244 | 0           | 0.02374071  |
| GO_FIBRILLAR_CENTER                                                                       | 72  | 0.474981   | 1.6793599 | 0.004103967 | 0.023855634 |
| REACTOME_DUAL_INCISION_IN_TC_NER                                                          | 38  | 0.5276519  | 1.6780027 | 0.004731861 | 0.02415244  |
| GO_ENDOSOME_MEMBRANE                                                                      | 261 | 0.4030701  | 1.6767989 | 0           | 0.024427755 |
| GO_DOUBLE_STRANDED_RNA_BINDING                                                            | 45  | 0.512321   | 1.6765358 | 0.003025719 | 0.024472175 |
| GO_REGULATION_OF_SUBSTRATE_ADHESION_DEPENDENT_CELL_SPREADING                              | 38  | 0.5283577  | 1.6761593 | 0.00619195  | 0.024523411 |
| GO_PROTEIN_MONOUBIQUITINATION                                                             | 33  | 0.5444889  | 1.6749125 | 0.006299213 | 0.024758019 |
| PID_ECADHERIN_STABILIZATION_PATHWAY                                                       | 30  | 0.56735545 | 1.6750182 | 0.007763975 | 0.024781117 |
| GO_POSITIVE_REGULATION_OF_PROTEIN_MODIFICATION_BY_SMALL_PROTEIN_CONJUGATION_OR_REMOVAL    | 62  | 0.48712793 | 1.6743238 | 0.004291846 | 0.02478604  |
| GO_CENTROMERE_COMPLEX_ASSEMBLY                                                            | 20  | 0.60777235 | 1.6744028 | 0.013468013 | 0.024803948 |
| REACTOME_RMTS METHYLATE HISTONE ARGININES                                                 | 15  | 0.6645514  | 1.6741087 | 0.005042017 | 0.024808986 |
| REACTOME_SPHINGOLIPID_METABOLISM                                                          | 47  | 0.51553905 | 1.6744033 | 0.001468429 | 0.024847388 |
| REACTOME_POSITIVE_EPIGENETIC_REGULATION_OF_RRNA_EXPRESSION                                | 25  | 0.57506853 | 1.6735516 | 0.003333333 | 0.024945106 |
| REACTOME_REGULATION_OF_HSF1_MEDIATED_HEAT_SHOCK_RESPONSE                                  | 57  | 0.48747817 | 1.6725482 | 0.001430615 | 0.025146509 |
| GO_VESICLE_MEDIATED_TRANSPORT_BETWEEN_ENDOSOMAL_COMPARTMENTS                              | 26  | 0.57917213 | 1.672278  | 0.004724409 | 0.025178755 |
| REACTOME_HEDGEHOG_OFF_STATE                                                               | 66  | 0.4860779  | 1.6725805 | 0.004219409 | 0.02518172  |
| GO_REGULATION_OF_STEM_CELL_DIFFERENTIATION                                                | 63  | 0.47741055 | 1.6715319 | 0.002805049 | 0.02521319  |

|                                                                                                 |     |            |           |             |             |
|-------------------------------------------------------------------------------------------------|-----|------------|-----------|-------------|-------------|
| REACTOME_DAP12_INTERACTIONS                                                                     | 29  | 0.5598096  | 1.6716449 | 0.008143323 | 0.02522645  |
| HALLMARK_PI3K_AKT_MTOR_SIGNALING                                                                | 69  | 0.47334036 | 1.6716548 | 0           | 0.02526827  |
| GO_NUCLEAR_MEMBRANE                                                                             | 157 | 0.42295763 | 1.6717727 | 0           | 0.025273181 |
| GO_POSITIVE_REGULATION_OF_CYTOKINE_PRODUCTION_INVOLVED_IN_IMMUNE_RESPONSE                       | 42  | 0.5216152  | 1.6705965 | 0.00304414  | 0.025399942 |
| GO_INTRINSIC_APOPTOTIC_SIGNALING_PATHWAY_INVOLVED_IN_RESPONSE_TO_OXIDATIVE_STRESS               | 27  | 0.5799983  | 1.6707245 | 0.001626016 | 0.02540679  |
| GO_REPLICATION_FORK                                                                             | 38  | 0.5236722  | 1.6681639 | 0.00619195  | 0.026032913 |
| GO_NUCLEOTIDE_SUGAR_BIOSYNTHETIC_PROCESS                                                        | 19  | 0.61931354 | 1.6669472 | 0.009819968 | 0.026355773 |
| REACTOME_INTEGRIN_SIGNALING                                                                     | 18  | 0.6223634  | 1.6667248 | 0.008517887 | 0.026372157 |
| REACTOME_TRANSLOCATION_OF_SLC2A4_GLUT4_TO_THE_PLASMA_MEMBRANE                                   | 51  | 0.4964066  | 1.6662561 | 0           | 0.02646608  |
| REACTOME_COPI_DEPENDENT_GOLGI_TO_ER_RETROGRADE_TRAFFIC                                          | 65  | 0.47409368 | 1.665772  | 0.007042253 | 0.026553074 |
| REACTOME_REGULATION_OF_TP53_ACTIVITY_THROUGH_PHOSPHORYLATION                                    | 51  | 0.49743745 | 1.6655774 | 0.001438849 | 0.026577333 |
| REACTOME_RAB_GERANYLGERANYLATION                                                                | 33  | 0.54233927 | 1.6644922 | 0.003021148 | 0.026865926 |
| GO_RESPONSE_TO_X_RAY                                                                            | 19  | 0.6273041  | 1.6642041 | 0.006622517 | 0.026891196 |
| GO_CHROMOSOME_SEPARATION                                                                        | 35  | 0.54177725 | 1.6633856 | 0.001536098 | 0.026940705 |
| REACTOME_HEDGEHOG_ON_STATE                                                                      | 41  | 0.5127065  | 1.6634101 | 0.001557632 | 0.026977863 |
| GO_B_CELL_HOMEOSTASIS                                                                           | 18  | 0.6159997  | 1.6630007 | 0.005128205 | 0.026991567 |
| GO_MITOTIC_CELL_CYCLE_CHECKPOINT                                                                | 79  | 0.46777108 | 1.6634505 | 0           | 0.02700849  |
| PID_PDGFRB_PATHWAY                                                                              | 91  | 0.45940414 | 1.6635189 | 0.001335114 | 0.027036043 |
| GO_HEMATOPOIETIC_PROGENITOR_CELL_DIFFERENTIATION                                                | 98  | 0.44783583 | 1.6626586 | 0.001356852 | 0.02704244  |
| GO_REGULATION_OF_TRANSLATIONAL_INITIATION                                                       | 43  | 0.5133539  | 1.6623259 | 0.004531722 | 0.027083416 |
| GO_SECONDARY_ACTIVE_TRANSMEMBRANE_TRANSPORTER_ACTIVITY                                          | 134 | -0.4262708 | -1.864296 | 0           | 0.027212048 |
| GO_DNA_REPLICATION                                                                              | 132 | 0.43489918 | 1.6609408 | 0.00129199  | 0.027420621 |
| GO_CELLULAR_RESPONSE_TO_DNA_DAMAGE_STIMULUS                                                     | 398 | 0.38924274 | 1.6593504 | 0           | 0.027786803 |
| GO_RAB_PROTEIN_SIGNAL_TRANSDUCTION                                                              | 35  | 0.5402068  | 1.6593672 | 0.00624025  | 0.027828163 |
| GO_ANION_CATION_SYMPORTER_ACTIVITY                                                              | 16  | -0.6597636 | -1.858822 | 0.005025126 | 0.02817584  |
| GO_REGULATION_OF_POSTTRANSCRIPTIONAL_GENE_SILENCING                                             | 52  | 0.5001324  | 1.6572024 | 0.004511278 | 0.02836352  |
| GO_SODIUM_ION_TRANSPORT                                                                         | 132 | -0.4142743 | -1.859376 | 0           | 0.028380426 |
| REACTOME_OVARIAN_TUMOR_DOMAIN_PROTEASES                                                         | 20  | 0.6002019  | 1.6569632 | 0.012658228 | 0.028395586 |
| GO_ORGANELLE_SUBCOMPARTMENT                                                                     | 194 | 0.41465673 | 1.6572497 | 0           | 0.02840248  |
| GO_NUCLEOBASE_CONTAINING_SMALL_MOLECULE_INTERCONVERSION                                         | 21  | 0.6085008  | 1.6560605 | 0.009677419 | 0.028604003 |
| GO_VOLTAGE_GATED_CATION_CHANNEL_ACTIVITY                                                        | 61  | -0.4846008 | -1.85146  | 0           | 0.028664114 |
| GO_DETECTION_OF_STIMULUS_INVOLVED_IN_SENSORIAL_PERCEPTION                                       | 56  | -0.4830886 | -1.852443 | 0           | 0.02882378  |
| PID_VEGFR1_PATHWAY                                                                              | 17  | 0.63586587 | 1.6550874 | 0.005025126 | 0.028825078 |
| REACTOME_APOPTOTIC_EXECUTION_PHASE                                                              | 37  | 0.5269682  | 1.6548626 | 0.004615385 | 0.028841471 |
| REACTOME_RECYCLING_PATHWAY_OF_L1                                                                | 32  | 0.5400054  | 1.6551409 | 0.014173228 | 0.028866174 |
| GO_NEUROTRANSMITTER_RECEPTOR_ACTIVITY_INVOLVED_IN_REGULATION_OF_POSTSYNAPTIC_MEMBRANE_POTENTIAL | 26  | -0.5883157 | -1.855707 | 0.002808989 | 0.02896859  |
| GO_TRANSMITTER_GATED_CHANNEL_ACTIVITY                                                           | 25  | -0.5851778 | -1.852922 | 0           | 0.029039145 |
| GO_RUFFLE_ORGANIZATION                                                                          | 36  | 0.5241069  | 1.6539214 | 0.002989537 | 0.02908927  |
| GO_REGULATION_OF_APOPTOTIC_SIGNALING_PATHWAY                                                    | 247 | 0.4056983  | 1.6533247 | 0           | 0.029186327 |
| REACTOME_SIGNALING_BY_HEDGEHOG                                                                  | 81  | 0.46072552 | 1.6534355 | 0.001388889 | 0.029194409 |

|                                                                                |     |            |           |             |             |
|--------------------------------------------------------------------------------|-----|------------|-----------|-------------|-------------|
| REACTOME_ECM_PROTEOGLYCANS                                                     | 50  | 0.500285   | 1.6530236 | 0.00304878  | 0.029237086 |
| GO_CALCIUM_DEPENDENT_PHOSPHOLIPID_BINDING                                      | 28  | 0.5571658  | 1.6526855 | 0.011345219 | 0.029254282 |
| GO_REGULATION_OF_VIRAL_ENTRY_INTO_HOST_CELL                                    | 20  | 0.6112548  | 1.6527257 | 0.004731861 | 0.029292472 |
| GO_ENDOCYTIC_VESICLE_MEMBRANE                                                  | 97  | 0.44616607 | 1.6519897 | 0.001369863 | 0.029318567 |
| GO_REGULATION_OF_UBIQUITIN_PROTEIN_TRANSFERASE_ACTIVITY                        | 24  | 0.5738712  | 1.6522827 | 0.004950495 | 0.029323785 |
| GO_REGULATION_OF_GLUONEOGENESIS                                                | 26  | -0.5705273 | -1.853139 | 0.002583979 | 0.029326055 |
| PID_S1P_S1P3_PATHWAY                                                           | 19  | 0.6143657  | 1.6520281 | 0.01        | 0.02935983  |
| GO_METAPHASE_ANAPHASE_TRANSITION_OF_CELL_CYCLE                                 | 23  | 0.5785311  | 1.6513098 | 0.011589404 | 0.029483506 |
| KEGG_SPHINGOLIPID_METABOLISM                                                   | 22  | 0.594262   | 1.6511387 | 0.001615509 | 0.029487597 |
| GO_UDP_GLYCOSYLTRANSFERASE_ACTIVITY                                            | 71  | 0.47446638 | 1.6506964 | 0.001390821 | 0.029563794 |
| GO_FC_EPSILON_RECEPTOR_SIGNALING_PATHWAY                                       | 79  | 0.4618246  | 1.6497692 | 0.001386963 | 0.029730204 |
| GO_GOLGI_VESICLE_BUDDING                                                       | 48  | 0.5061613  | 1.650067  | 0.004601227 | 0.029736577 |
| GO_DNA_REPAIR_COMPLEX                                                          | 23  | 0.5830564  | 1.6495402 | 0.011146497 | 0.029738763 |
| GO_REGULATION_OF_GENE_EXPRESSION_EPIGENETIC                                    | 136 | 0.42526323 | 1.6498095 | 0           | 0.029760692 |
| GO_ANTERIOR_POSTERIOR_AXIS_SPECIFICATION                                       | 27  | -0.5787761 | -1.84648  | 0.002808989 | 0.029910322 |
| GO_LIPOSACCHARIDE_METABOLIC_PROCESS                                            | 65  | 0.4747939  | 1.6486447 | 0.001443001 | 0.029977104 |
| REACTOME_COLLAGEN_BIOSYNTHESIS_AND_MODIFYING_ENZYMES                           | 42  | 0.52283794 | 1.6478988 | 0.006006006 | 0.030155504 |
| GO_ION_TRANSMEMBRANE_TRANSPORTER_ACTIVITY                                      | 426 | -0.3665341 | -1.842496 | 0           | 0.030589182 |
| GO_T_CELL_RECEPTOR_SIGNALING_PATHWAY                                           | 130 | 0.43248913 | 1.6459966 | 0           | 0.030736068 |
| GO_MULTICELLULAR_ORGANISMAL_SIGNALING                                          | 117 | -0.4250834 | -1.843178 | 0           | 0.030752158 |
| GO_NEGATIVE_REGULATION_OF_VIRAL_PROCESS                                        | 65  | 0.46645463 | 1.6455444 | 0.004310345 | 0.030826207 |
| GO_LATE_ENDOSOME_MEMBRANE                                                      | 71  | 0.46333843 | 1.6446264 | 0.002785515 | 0.030975148 |
| GO_DOUBLE_STRAND_BREAK_REPAIR                                                  | 87  | 0.4523774  | 1.6446944 | 0           | 0.03100422  |
| GO_REGULATION_OF_PROTEOLYSIS                                                   | 411 | 0.3901872  | 1.644779  | 0           | 0.03102574  |
| GO_EXTRACELLULAR_LIGAND_GATED_ION_CHANNEL_ACTIVITY                             | 34  | -0.5417783 | -1.840054 | 0           | 0.031032708 |
| KEGG_HISTIDINE_METABOLISM                                                      | 19  | -0.6268019 | -1.837043 | 0           | 0.031048585 |
| REACTOME_COPII_MEDIATED_VESICLE_TRANSPORT                                      | 40  | 0.5157585  | 1.643813  | 0.00295421  | 0.031106165 |
| GO_SPLICEOSOMAL_TRI_SNRNP_COMPLEX                                              | 19  | 0.6032983  | 1.6440395 | 0.017973857 | 0.031115346 |
| GO_SITE_OF_DOUBLE_STRAND_BREAK                                                 | 22  | 0.58188635 | 1.6438402 | 0.0144      | 0.03114447  |
| GO_GLANDULAR_EPITHELIAL_CELL_DIFFERENTIATION                                   | 24  | -0.5856792 | -1.838621 | 0.002702703 | 0.031152051 |
| REACTOME_GLOBAL_GENOME_NUCLEOTIDE_EXCISION_REPAIR_GG_NER                       | 48  | 0.4909652  | 1.6429482 | 0.010130246 | 0.03137379  |
| REACTOME_SIGNALING_BY_GPCR                                                     | 426 | -0.3650066 | -1.837166 | 0           | 0.03140141  |
| GO_NEGATIVE_REGULATION_OF_GLIOGENESIS                                          | 24  | -0.5806089 | -1.833491 | 0.007731959 | 0.03182312  |
| GO_DNA_INTEGRITY_CHECKPOINT                                                    | 72  | 0.4677669  | 1.6409832 | 0.002773925 | 0.031847585 |
| REACTOME_CARBOXYTERMINAL_POST_TRANSLATIONAL_MODIFICATIONS_OF_TUBULIN           | 21  | 0.5854585  | 1.6412808 | 0.00792393  | 0.031854533 |
| GO_REGULATION_OF_DNA_DAMAGE_RESPONSE_SIGNAL_TRANSDUCTION_BY_P53_CLASS_MEDIATOR | 20  | 0.600993   | 1.6410073 | 0.013422819 | 0.031894475 |
| GO_POSITIVE_REGULATION_OF_DNA_BIOSYNTHETIC_PROCESSES                           | 36  | 0.5310177  | 1.6402189 | 0.006069803 | 0.031908218 |
| GO_UNFOLDED_PROTEIN_BINDING                                                    | 72  | 0.470065   | 1.6405557 | 0           | 0.03193014  |
| GO_NON_CANONICAL_WNT_SIGNALING_PATHWAY                                         | 84  | 0.45585862 | 1.6402677 | 0.004166667 | 0.03193512  |
| GO_DNA_BINDING_TRANSCRIPTION_ACTIVATOR_ACTIVITY                                | 230 | -0.3906844 | -1.830096 | 0           | 0.03194764  |
| GO_SPHINGOLIPID_METABOLIC_PROCESS                                              | 86  | 0.45397747 | 1.6403214 | 0.002666667 | 0.031960722 |
| GO_REGULATION_OF_NEUROTRANSMITTER_SECRETION                                    | 57  | -0.4795173 | -1.830285 | 0           | 0.032190647 |
| KEGG_P53_SIGNALING_PATHWAY                                                     | 46  | 0.50350904 | 1.6391358 | 0.001533742 | 0.03225608  |

|                                                                     |     |            |           |             |             |
|---------------------------------------------------------------------|-----|------------|-----------|-------------|-------------|
| GO_REGULATION_OF_PHAGOCYTOSIS                                       | 62  | 0.47562456 | 1.6388372 | 0.001512859 | 0.03232056  |
| GO_PHAGOCYTOSIS                                                     | 190 | 0.4106393  | 1.6386918 | 0           | 0.032329157 |
| KEGG_TRYPTOPHAN_METABOLISM                                          | 30  | -0.540733  | -1.830802 | 0.010781671 | 0.032335676 |
| GO_PROTEIN_LOCALIZATION_TO_MEMBRANE                                 | 328 | 0.39044708 | 1.6378874 | 0           | 0.032492947 |
| GO_TERTIARY_GRANULE_LUMEN                                           | 43  | 0.5101754  | 1.6379185 | 0.006389776 | 0.03253119  |
| KEGG_SMALL_CELL_LUNG_CANCER                                         | 54  | 0.49353242 | 1.6374582 | 0.001426534 | 0.032593116 |
| GO_LYTIC_VACUOLE_ORGANIZATION                                       | 39  | 0.52150905 | 1.6370512 | 0.007507508 | 0.032613896 |
| GO_REGULATION_OF_PEPTIDASE_ACTIVITY                                 | 256 | 0.40134314 | 1.636808  | 0           | 0.03262222  |
| GO_RESPONSE_TO_AMINO_ACID_STARVATION                                | 26  | 0.56255454 | 1.6371015 | 0.01618123  | 0.032649055 |
| GO_MEDIATOR_COMPLEX                                                 | 16  | 0.6294389  | 1.6361692 | 0.012006861 | 0.0328211   |
| REACTOME_INTERLEUKIN_1_FAMILY_SIGNALING                             | 75  | 0.46256882 | 1.6360155 | 0.002777778 | 0.032821532 |
| REACTOME_ACTIVATION_OF_ATR_IN_RESPONSE_TO_REPLICATION_STRESS        | 20  | 0.5938668  | 1.6355824 | 0.008196721 | 0.03293332  |
| REACTOME_TRANSCRIPTIONAL_REGULATION_BY_TP53                         | 194 | 0.40459135 | 1.6350027 | 0           | 0.033003062 |
| GO_TRANSFERASE_COMPLEX                                              | 371 | 0.38693672 | 1.6351447 | 0           | 0.033014886 |
| GO_PROTEIN_LOCALIZATION_TO_ORGANELLE                                | 493 | 0.37738493 | 1.6348056 | 0           | 0.03301805  |
| GO_HISTONE_UBIQUITINATION                                           | 18  | 0.6150471  | 1.6345987 | 0.017944535 | 0.033040248 |
| GO_ORGANIC_ACID_TRANSPORT                                           | 193 | -0.3943451 | -1.824928 | 0           | 0.033442445 |
| BIOCARTA_RACCYCD_PATHWAY                                            | 18  | 0.60984015 | 1.6332468 | 0.014446228 | 0.033495564 |
| GO_EXTRINSIC_COMPONENT_OF_PLASMA_MEMBRANE                           | 88  | 0.44907212 | 1.6324701 | 0           | 0.03367528  |
| REACTOME_SEMA4D_IN_SEMAPHORIN_SIGNALING                             | 17  | 0.62701577 | 1.6325299 | 0.009661836 | 0.03371152  |
| GO_REGULATION_OF_RECEPTOR_RECYCLING                                 | 19  | 0.59445524 | 1.6321028 | 0.017799353 | 0.033748917 |
| GO_PML_BODY                                                         | 51  | 0.4875049  | 1.6312711 | 0.001443001 | 0.034004565 |
| REACTOME_TNFR2_NON_CANONICAL_NF_KB_PATHWAY                          | 60  | 0.47329244 | 1.6310471 | 0.005755396 | 0.034033794 |
| GO_LYMPHOCYTE_MEDIATED_IMMUNITY                                     | 178 | 0.40989488 | 1.6301018 | 0           | 0.03433313  |
| GO_CYTOKINE_MEDIATED_SIGNALING_PATHWAY                              | 483 | 0.37884563 | 1.6296204 | 0           | 0.03441517  |
| REACTOME_COPI_INDEPENDENT_GOLGI_TO_ER_RETROGRADE_TRAFFIC            | 36  | 0.5222479  | 1.6294802 | 0.003076923 | 0.034418907 |
| GO_NEGATIVE_REGULATION_OF_SIGNAL_TRANSDUCTION_BY_P53_CLASS_MEDIATOR | 18  | 0.612571   | 1.6293263 | 0.015679443 | 0.034425747 |
| GO_ACTIVATED_T_CELL_PROLIFERATION                                   | 21  | 0.5884771  | 1.6296991 | 0.02003339  | 0.034434784 |
| GO_NEGATIVE_REGULATION_OF_AUTOPHAGY                                 | 41  | 0.51055723 | 1.629095  | 0.005873715 | 0.03446432  |
| GO_RAC_PROTEIN_SIGNAL_TRANSDUCTION                                  | 25  | 0.5676506  | 1.6286608 | 0.010989011 | 0.034562    |
| GO_REGULATION_OF_PROTEIN_CATABOLIC_PROCESS                          | 217 | 0.40116957 | 1.6279012 | 0           | 0.03478536  |
| GO_TRANSLATION_REGULATOR_ACTIVITY                                   | 58  | 0.4858442  | 1.6271089 | 0.001420455 | 0.034970544 |
| GO_MACROAUTOPHAGY                                                   | 150 | 0.41722256 | 1.626948  | 0           | 0.034972113 |
| GO_REGULATION_OF_CHROMOSOME_ORGANIZATION                            | 149 | 0.41891298 | 1.6271213 | 0           | 0.035019547 |
| GO_REGULATION_OF_SPINDLE_ORGANIZATION                               | 25  | 0.5571972  | 1.6264066 | 0.010785825 | 0.03510578  |
| GO_POSITIVE_REGULATION_OF_LAMELLIPODIUM_ORGANIZATION                | 16  | 0.6270376  | 1.6260619 | 0.022988506 | 0.035170145 |
| REACTOME_G_ALPHA_S_SIGNALING_EVENTS                                 | 90  | -0.4443101 | -1.818981 | 0           | 0.035229765 |
| REACTOME_DNA_DAMAGE_BYPASS                                          | 28  | 0.543842   | 1.6252867 | 0.007763975 | 0.035406128 |
| REACTOME_SYNDECAN_INTERACTIONS                                      | 23  | 0.58345336 | 1.6240604 | 0.01255887  | 0.035794597 |
| GO_REGULATION_OF_HUMORAL_IMMUNE_RESPONSE                            | 65  | 0.46637338 | 1.6233224 | 0.001464129 | 0.035980355 |
| GO_REGULATION_OF_CELLULAR_RESPONSE_TO_HEAT                          | 55  | 0.47921106 | 1.6233823 | 0           | 0.036006022 |
| GO_IMMUNE_RESPONSE_REGULATING_SIGNALING_PATHWAY                     | 365 | 0.38188958 | 1.6219691 | 0           | 0.036411673 |
| GO_COMPLEX_OF_COLLAGEN_TRIMERS                                      | 16  | 0.62785625 | 1.6216571 | 0.017713366 | 0.036465287 |
| GO_NEGATIVE_REGULATION_OF_MULTI_ORGANISM_PROCESSES                  | 141 | 0.41682976 | 1.6205122 | 0           | 0.036815133 |
| GO_CYSTEINE_TYPE_PEPTIDASE_ACTIVITY                                 | 76  | 0.45723236 | 1.6205354 | 0           | 0.0368646   |
| GO_POSITIVE_REGULATION_OF_TRANSLATION                               | 69  | 0.46471193 | 1.6184819 | 0.002762431 | 0.037494566 |

|                                                                                                                   |     |            |           |             |             |
|-------------------------------------------------------------------------------------------------------------------|-----|------------|-----------|-------------|-------------|
| REACTOME_SCAVENGING_BY_CLASS_A_RECEPTORS                                                                          | 15  | 0.6315865  | 1.6181259 | 0.013490725 | 0.037552807 |
| GO_AMYLOID_PRECURSOR_PROTEIN_CATABOLIC_PROCESS                                                                    | 34  | 0.5244642  | 1.617911  | 0.004680187 | 0.03757447  |
| GO_SECRETORY_GRANULE_MEMBRANE                                                                                     | 189 | 0.40083385 | 1.6175712 | 0           | 0.037658013 |
| KEGG_ECM_RECEPTOR_INTERACTION                                                                                     | 59  | 0.4749676  | 1.6155157 | 0.005813954 | 0.038043242 |
| GO_NEGATIVE_REGULATION_OF_CELLULAR_PROTEIN_CATABOLIC_PROCESS                                                      | 45  | 0.50516766 | 1.615654  | 0.008928572 | 0.03804343  |
| GO_FC_RECEPTOR_MEDIATED_STIMULATORY_SIGNALING_PATHWAY                                                             | 69  | 0.464962   | 1.6153257 | 0.005586592 | 0.038052816 |
| GO_FILOPODIUM                                                                                                     | 64  | 0.47254473 | 1.6162333 | 0.001449275 | 0.038058028 |
| REACTOME_CHROMATIN_MODIFYING_ENZYMES                                                                              | 87  | 0.4430934  | 1.6156904 | 0.001449275 | 0.038091253 |
| GO_REGULATION_OF_CELL_CYCLE_PHASE_TRANSITION                                                                      | 230 | 0.39529097 | 1.6156962 | 0           | 0.038143452 |
| GO_SPLICEOSOMAL_SNRNP_ASSEMBLY                                                                                    | 16  | 0.6210476  | 1.6149405 | 0.016474465 | 0.038145933 |
| REACTOME_TRANSCRIPTION_OF_THE_HIV_GENOME                                                                          | 40  | 0.49954584 | 1.6157328 | 0.005988024 | 0.03818456  |
| REACTOME_FANCONI_ANEMIA_PATHWAY                                                                                   | 15  | 0.6268142  | 1.6143576 | 0.012820513 | 0.03833079  |
| GO_CATALYTIC_ACTIVITY_ACTING_ON_RNA                                                                               | 157 | 0.41079715 | 1.6135097 | 0           | 0.03846893  |
| GO_CELLULAR_PROTEIN_CONTAINING_COMPLEX_ASSEMBLY                                                                   | 484 | 0.37398955 | 1.6136603 | 0           | 0.038471118 |
| GO_PROTEIN_TRIMERIZATION                                                                                          | 20  | 0.5730363  | 1.6136643 | 0.010135135 | 0.03852468  |
| GO_MEMBRANE_ORGANIZATION                                                                                          | 444 | 0.37857157 | 1.6124614 | 0           | 0.038638312 |
| REACTOME_TRANSPORT_TO_THE_GOLGI_AND_SUBSEQUENT_MODIFICATION                                                       | 122 | 0.4242084  | 1.6126046 | 0.002587322 | 0.03864611  |
| GO_REGULATION_OF_PROTEIN_OLIGOMERIZATION                                                                          | 18  | 0.6019878  | 1.6126131 | 0.025125628 | 0.03869409  |
| REACTOME_SIGNALING_BY_PTK6                                                                                        | 30  | 0.53480226 | 1.6126767 | 0.01255887  | 0.03872558  |
| GO_MANGANESE_ION_BINDING                                                                                          | 38  | 0.51328117 | 1.6115377 | 0.001515152 | 0.038850453 |
| GO_NUCLEAR_TRANSCRIBED_MRNA_CATABOLIC_PROCESS                                                                     | 82  | 0.446547   | 1.611613  | 0.002853067 | 0.03887103  |
| REACTOME_BIOSYNTHESIS_OF_THE_N_GLYCAN_PRECURSOR_DOLICHOL_LIPID_LINKED_OLIGOSACCHARIDE_LINKED_TO_A_NASCENT_PROTEIN | 51  | 0.4901231  | 1.6116853 | 0.007451565 | 0.03890681  |
| GO_CALCIIUM_CHANNEL_COMPLEX                                                                                       | 31  | -0.5322194 | -1.802515 | 0.003058104 | 0.039215233 |
| GO_TRANSLESION_SYNTHESIS                                                                                          | 21  | 0.569767   | 1.609871  | 0.006644518 | 0.03943121  |
| GO_SENSORY_PERCEPTION_OF_LIGHT_STIMULUS                                                                           | 93  | -0.4315745 | -1.806007 | 0           | 0.039523233 |
| GO_NEURON_CELLULAR_HOMEOSTASIS                                                                                    | 21  | -0.5920275 | -1.803552 | 0           | 0.039559163 |
| GO_PITUITARY_GLAND_DEVELOPMENT                                                                                    | 22  | -0.5870276 | -1.802616 | 0.005494506 | 0.039590165 |
| GO_NEGATIVE_REGULATION_OF_FAT_CELL_DIFFERENTIATION                                                                | 25  | -0.5762386 | -1.804436 | 0.002617801 | 0.039669827 |
| GO_REGULATION_OF_SYSTEM_PROCESS                                                                                   | 335 | -0.3643834 | -1.796948 | 0           | 0.03983545  |
| GO_TERTIARY_GRANULE_MEMBRANE                                                                                      | 49  | 0.4854756  | 1.6082313 | 0.007496252 | 0.039969318 |
| GO_MULTICELLULAR_ORGANISMAL_MOVEMENT                                                                              | 33  | -0.5318728 | -1.797412 | 0           | 0.04000536  |
| GO_STEROID_HORMONE_BIOSYNTHETIC_PROCESS                                                                           | 43  | -0.5027383 | -1.798246 | 0.003003003 | 0.040056843 |
| GO_NUCLEOSOME_BINDING                                                                                             | 26  | 0.54688704 | 1.607599  | 0.012638231 | 0.04008345  |
| GO_GLYCOPROTEIN_BIOSYNTHETIC_PROCESS                                                                              | 184 | 0.40120906 | 1.6077023 | 0           | 0.040108297 |
| GO_DIGESTION                                                                                                      | 86  | -0.4357521 | -1.798499 | 0           | 0.04033825  |
| GO_NEGATIVE_REGULATION_OF_INTRINSIC_APOPTOTIC_SIGNALING_PATHWAY                                                   | 61  | 0.46546397 | 1.6067181 | 0.002915452 | 0.04035693  |
| BIOCARTA_FAS_PATHWAY                                                                                              | 25  | 0.5630482  | 1.605286  | 0.01642036  | 0.040817577 |
| GO_PROTEIN_LOCALIZATION_TO_VACUOLE                                                                                | 37  | 0.50852835 | 1.6050831 | 0.007429421 | 0.040842157 |
| REACTOME_ION_CHANNEL_TRANSPORT                                                                                    | 96  | -0.4344789 | -1.79255  | 0           | 0.040937223 |
| GO_POSITIVE_REGULATION_OF_CHROMOSOME_ORGANIZATION                                                                 | 81  | 0.4501771  | 1.60443   | 0.002832861 | 0.04094225  |
| GO_GLYCOPROTEIN_METABOLIC_PROCESS                                                                                 | 223 | 0.39334688 | 1.6044699 | 0           | 0.040988535 |

|                                                                                                                              |     |            |           |             |             |
|------------------------------------------------------------------------------------------------------------------------------|-----|------------|-----------|-------------|-------------|
| GO_MICROBODY_LUMEN                                                                                                           | 34  | -0.5212005 | -1.793081 | 0           | 0.041085806 |
| GO_POSITIVE_REGULATION_OF_DNA_METABOLIC_PROCESS                                                                              | 91  | 0.43801636 | 1.6031524 | 0.002717391 | 0.041345797 |
| REACTOME_EUKARYOTIC_TRANSLATION_INITIATION                                                                                   | 48  | 0.48565117 | 1.603265  | 0.001519757 | 0.04136416  |
| GO_REGULATION_OF_TOLL_LIKE_RECEPTOR_SIGNALING_PATHWAY                                                                        | 41  | 0.50045174 | 1.60135   | 0.004552352 | 0.04205631  |
| GO_ESTABLISHMENT_OF_ORGANELLE_LOCALIZATION                                                                                   | 237 | 0.39126027 | 1.6000053 | 0           | 0.042421404 |
| GO_TOLL_LIKE_RECEPTOR_4_SIGNALING_PATHWAY                                                                                    | 23  | 0.5656719  | 1.6000744 | 0.014634146 | 0.042443793 |
| KEGG_CELL_ADHESION_MOLECULES_CAMS                                                                                            | 94  | 0.4324113  | 1.5998069 | 0           | 0.04244488  |
| GO_ANCHORING_JUNCTION                                                                                                        | 499 | 0.3708808  | 1.6001178 | 0           | 0.042486418 |
| GO_POSITIVE_REGULATION_OF_ORGANELLE_ORGANIZATION                                                                             | 326 | 0.38200486 | 1.5990367 | 0           | 0.042659655 |
| BIOCARTA_DEATH_PATHWAY                                                                                                       | 23  | 0.54462194 | 1.5986363 | 0.014308427 | 0.042763    |
| GO_CYSTEINE_TYPE_ENDOPEPTIDASE_ACTIVITY                                                                                      | 57  | 0.47213522 | 1.5984296 | 0.008633094 | 0.042782865 |
| PID_CXCR3_PATHWAY                                                                                                            | 34  | 0.5155455  | 1.5982426 | 0.007656968 | 0.042793483 |
| GO_NEURON_PROJECTION_EXTENSION_INVOLVED_IN_NEURON_PROJECTION_GUIDANCE                                                        | 22  | -0.5796378 | -1.786352 | 0           | 0.043013852 |
| GO_RIBONUCLEOPROTEIN_GRANULE                                                                                                 | 117 | 0.42098287 | 1.5974942 | 0.001308901 | 0.043057404 |
| GO_NEUROPEPTIDE_HORMONE_ACTIVITY                                                                                             | 15  | -0.6408447 | -1.78512  | 0.007462686 | 0.043205146 |
| GO_REGULATION_OF_DEFENSE_RESPONSE                                                                                            | 444 | 0.37255353 | 1.5968342 | 0           | 0.043271385 |
| GO_EARLY_ENDOSOME_MEMBRANE                                                                                                   | 76  | 0.4487953  | 1.5963267 | 0.005698006 | 0.04335497  |
| GO_VACUOLAR_TRANSPORT                                                                                                        | 80  | 0.45444956 | 1.5960469 | 0.006756757 | 0.04340328  |
| REACTOME_DDX58_IFIH1_MEDIATED_INDUCION_OF_INTERFERON_ALPHA_BETA                                                              | 38  | 0.5054731  | 1.59635   | 0.004470939 | 0.04340359  |
| REACTOME_DNA_DAMAGE_TELOMERE_STRESS_INDUCED_SENESCENCE                                                                       | 16  | 0.6013704  | 1.5958669 | 0.015100671 | 0.04341713  |
| GO_SMALL_GTPASE_MEDIATED_SIGNAL_TRANSDUCTION                                                                                 | 299 | 0.3813788  | 1.5956008 | 0           | 0.04347959  |
| REACTOME_ASSOCIATION_OF_TRIC_CCT_WITH_TARGET_PROTEINS_DURING_BIOSYNTHESIS                                                    | 16  | 0.61647874 | 1.5954458 | 0.016313214 | 0.043495756 |
| GO_SODIUM_ION_HOMEOSTASIS                                                                                                    | 40  | -0.5118488 | -1.781806 | 0           | 0.043701787 |
| GO_PROTEIN_INSERTION_INTO_MEMBRANE                                                                                           | 36  | 0.51132274 | 1.594602  | 0.006144393 | 0.043812357 |
| KEGG_DRUG_METABOLISM_CYTOCHROME_P450                                                                                         | 41  | -0.5002871 | -1.782192 | 0           | 0.044033863 |
| GO_INORGANIC_ANION_TRANSPORT                                                                                                 | 94  | -0.4162954 | -1.771266 | 0           | 0.04419022  |
| GO_REGULATION_OF_CARDIAC_MUSCLE_CELL_DIFFERENTIATION                                                                         | 18  | -0.6140541 | -1.771842 | 0.004950495 | 0.044295903 |
| GO_IMMUNE_RESPONSE_REGULATING_CELL_SURFACE_RECEPTOR_SIGNALING_PATHWAY                                                        | 262 | 0.38841546 | 1.592751  | 0           | 0.04454563  |
| GO_PROTEIN_HETEROOLIGOMERIZATION                                                                                             | 53  | 0.4756081  | 1.5925759 | 0.01510574  | 0.044558816 |
| GO_REGULATION_OF_BLOOD_CIRCULATION                                                                                           | 173 | -0.3903243 | -1.779075 | 0           | 0.044579607 |
| GO_ADAPTIVE_IMMUNE_RESPONSE_BASED_ON_SOMATIC_RECOMBINATION_OF_IMMUNE_RECEPTORS_BUILT_FROM_IMMUNOGLOBULIN_SUPERFAMILY_DOMAINS | 181 | 0.40215802 | 1.592201  | 0           | 0.04465212  |
| GO_SMALL_MOLECULE_CATABOLIC_PROCESS                                                                                          | 296 | -0.3683727 | -1.771877 | 0           | 0.044653274 |
| REACTOME_COOPERATION_OF_PREFOLDIN_AND_TRIC_CCT_IN_ACTIN_AND_TUBULIN_FOLDING                                                  | 25  | 0.558762   | 1.591982  | 0.02027027  | 0.044681072 |
| REACTOME_SLC_MEDIATED_TRANSMEMBRANE_TRANSPORT                                                                                | 142 | -0.3998243 | -1.771883 | 0           | 0.045034926 |
| GO_RUFFLE_ASSEMBLY                                                                                                           | 27  | 0.5438054  | 1.5909795 | 0.015479876 | 0.045055147 |
| REACTOME_TRANSPORT_OF_INORGANIC_CATIONS_ANIONS_AND_AMINO_ACIDS_OLIGOPEPTIDES                                                 | 64  | -0.4599974 | -1.77679  | 0           | 0.04506091  |
| GO_CELLULAR_RESPONSE_TO_XENOBIOTIC_STIMULUS                                                                                  | 117 | -0.4051574 | -1.77269  | 0           | 0.045112416 |
| GO_DRUG_TRANSPORT                                                                                                            | 104 | -0.4131524 | -1.76683  | 0           | 0.04512687  |



|                                                                                 |     |            |           |             |             |
|---------------------------------------------------------------------------------|-----|------------|-----------|-------------|-------------|
| GO_DNA_DAMAGE_RESPONSE_DETECTION_OF_DNA_DAMAGE                                  | 23  | 0.5594941  | 1.5904945 | 0.020134227 | 0.045135356 |
| GO_REGULATION_OF_CELLULAR_CATABOLIC_PROCESS                                     | 436 | 0.37475374 | 1.5906402 | 0           | 0.045139734 |
| GO_HORMONE_METABOLIC_PROCESS                                                    | 152 | -0.4029413 | -1.775427 | 0           | 0.045220938 |
| GO_NEUTRAL_LIPID_METABOLIC_PROCESS                                              | 67  | -0.4407115 | -1.767373 | 0           | 0.045254506 |
| GO_AROMATASE_ACTIVITY                                                           | 17  | -0.6321937 | -1.765581 | 0.004938272 | 0.04532702  |
| GO_LIGAND_ACTIVATED_TRANSCRIPTION_FACTOR_ACTIVITY                               | 29  | -0.5475035 | -1.758994 | 0.008       | 0.045448937 |
| REACTOME_PEROXISOMAL_LIPID_METABOLISM                                           | 19  | -0.6053978 | -1.767694 | 0           | 0.04547197  |
| GO_PHOSPHATE_ION_TRANSPORT                                                      | 17  | -0.6205833 | -1.772768 | 0           | 0.045476727 |
| GO_ENDOPLASMIC_RETICULUM_LUMEN                                                  | 198 | 0.39611787 | 1.5894519 | 0           | 0.04551138  |
| GO_POSITIVE_REGULATION_OF_LIPID_CATABOLIC_PROCESS                               | 16  | -0.6335639 | -1.773654 | 0.010178117 | 0.045522198 |
| GO_L_AMINO_ACID_TRANSMEMBRANE_TRANSPORTER_ACTIVITY                              | 30  | -0.5399169 | -1.759734 | 0.008474576 | 0.045523126 |
| GO_ORGANELLE_LOCALIZATION                                                       | 336 | 0.37593928 | 1.58917   | 0           | 0.045574337 |
| GO_THYROID_HORMONE_METABOLIC_PROCESS                                            | 15  | -0.6507825 | -1.761954 | 0.012787724 | 0.04570785  |
| GO_ARGININE_METABOLIC_PROCESS                                                   | 15  | -0.6316903 | -1.759978 | 0.012722646 | 0.045735907 |
| GO_SENSORY_PERCEPTION                                                           | 258 | -0.3718487 | -1.760729 | 0           | 0.045812137 |
| GO_INORGANIC_ANION_TRANSMEMBRANE_TRANSPORT                                      | 66  | -0.4468605 | -1.762204 | 0           | 0.046036914 |
| GO_CELL_FATE_SPECIFICATION                                                      | 41  | -0.4962939 | -1.762877 | 0.002949853 | 0.046091318 |
| GO_REGULATION_OF_RESPONSE_TO_DNA_DAMAGE_STIMULUS                                | 99  | 0.42916715 | 1.5878026 | 0.003916449 | 0.04614249  |
| GO_ZYMOGEN_ACTIVATION                                                           | 40  | 0.4961847  | 1.5871564 | 0.010852713 | 0.04615665  |
| GO_AMYLOID_BETA_FORMATION                                                       | 26  | 0.550562   | 1.587503  | 0.012987013 | 0.046159342 |
| GO_DISULFIDE_OXIDOREDUCTASE_ACTIVITY                                            | 29  | 0.52246755 | 1.5876156 | 0.0171875   | 0.04617293  |
| GO_CELLULAR_PIGMENTATION                                                        | 25  | 0.5527779  | 1.5872077 | 0.01650165  | 0.04619347  |
| GO_MHC_PROTEIN_BINDING                                                          | 23  | 0.56611    | 1.5865935 | 0.009646302 | 0.046325415 |
| GO_REGULATION_OF_RUFFLE_ASSEMBLY                                                | 20  | 0.58554715 | 1.5861813 | 0.014240506 | 0.04638301  |
| REACTOME_SIGNALING_BY_INTERLEUKINS                                              | 271 | 0.38580447 | 1.5862364 | 0           | 0.04642517  |
| GO_AMINO_ACID_TRANSMEMBRANE_TRANSPORTER_ACTIVITY                                | 39  | -0.5032964 | -1.755011 | 0.003215434 | 0.046740837 |
| PID_ILK_PATHWAY                                                                 | 29  | 0.53178185 | 1.5848733 | 0.018691588 | 0.04689887  |
| KEGG_BASAL_TRANSCRIPTION_FACTORS                                                | 21  | 0.55800587 | 1.5837731 | 0.020547945 | 0.047252424 |
| GO_REGULATION_OF_RECEPTOR_MEDIATED_ENDOCYTOSIS                                  | 61  | 0.46183455 | 1.5838549 | 0.00591716  | 0.04728276  |
| GO_PROTEIN_LOCALIZATION_TO_LYSOSOME                                             | 23  | 0.5553502  | 1.5831027 | 0.022187004 | 0.04747176  |
| GO_IRE1_MEDIATED_UNFOLDED_PROTEIN_RESPONSE                                      | 39  | 0.49907082 | 1.5820284 | 0.012084592 | 0.04768508  |
| GO_REGULATION_OF_TELOMERASE_ACTIVITY                                            | 23  | 0.5518105  | 1.5820633 | 0.020833334 | 0.04773614  |
| GO_TRANSCRIPTION_COUPLED_NUCLEOTIDE_EXCISION_REPAIR                             | 40  | 0.49606597 | 1.5817455 | 0.009375    | 0.047749825 |
| GO_REGULATION_OF_EPITHELIAL_CELL_DIFFERENTIATION_INVOLVED_IN_KIDNEY_DEVELOPMENT | 15  | 0.6289511  | 1.5815632 | 0.024096385 | 0.047764853 |
| GO_POSITIVE_REGULATION_OF_CELLULAR_AMIDE_METABOLIC_PROCESS                      | 88  | 0.43384886 | 1.5821308 | 0           | 0.047769453 |
| GO_NEGATIVE_REGULATION_OF_MACROAUTOPHAGY                                        | 17  | 0.5945564  | 1.5822417 | 0.016528925 | 0.047802966 |
| GO_PROTEIN_LOCALIZATION_TO_NUCLEUS                                              | 153 | 0.40493637 | 1.5805938 | 0           | 0.048071727 |
| GO_NEGATIVE_REGULATION_OF_PROTEIN_CATABOLIC_PROCESS                             | 72  | 0.4501517  | 1.5806586 | 0.005665722 | 0.048104003 |
| GO_TETRAPYRROLE_BINDING                                                         | 88  | -0.4289933 | -1.74575  | 0.003831418 | 0.04824443  |
| GO_LONG_TERM_MEMORY                                                             | 20  | -0.5824333 | -1.750679 | 0.002590674 | 0.048282094 |
| BIOCARTA_EDG1_PATHWAY                                                           | 18  | 0.5911238  | 1.579967  | 0.026845638 | 0.0483208   |

|                                                                 |     |            |           |             |             |
|-----------------------------------------------------------------|-----|------------|-----------|-------------|-------------|
| GO_HORMONE_BIOSYNTHETIC_PROCESS                                 | 60  | -0.4617131 | -1.746289 | 0           | 0.048325107 |
| GO_AMINO_ACID_TRANSPORT                                         | 79  | -0.433673  | -1.747008 | 0           | 0.048361402 |
| REACTOME_FORMATION_OF_TUBULIN_FOLDING_INTERMEDIATES_BY_CCT_TRIC | 19  | 0.5777201  | 1.5796008 | 0.031932775 | 0.048449222 |
| HALLMARK_UV_RESPONSE_DN                                         | 103 | 0.42234525 | 1.5792805 | 0.004048583 | 0.048525326 |
| GO_TUMOR_NECROSIS_FACTOR_SUPERFAMILY_CYTOKINE_PRODUCTION        | 97  | 0.42169037 | 1.5791173 | 0.00136612  | 0.048526753 |
| GO_PRERIBOSOME                                                  | 36  | 0.51569194 | 1.578897  | 0.014446228 | 0.048567295 |
| GO_REGULATION_OF_NECROTIC_CELL_DEATH                            | 15  | 0.60218567 | 1.5785763 | 0.025423728 | 0.048621394 |
| GO_PROTEIN_REFOLDING                                            | 24  | 0.54771054 | 1.5782032 | 0.017001545 | 0.048670348 |
| REACTOME_PHASE_I_FUNCTIONALIZATION_OF_COMPOUNDS                 | 69  | -0.4456147 | -1.747073 | 0           | 0.04869397  |
| GO_SPINDLE                                                      | 172 | 0.3999209  | 1.5782253 | 0           | 0.048729435 |
| GO_REGULATION_OF_ATPASE_ACTIVITY                                | 57  | 0.46476227 | 1.577801  | 0.001477105 | 0.04879429  |
| GO_REGULATION_OF KERATINOCYTE DIFFERENTIATION                   | 19  | -0.5950397 | -1.74856  | 0.007334963 | 0.048799325 |
| GO_HIPPO_SIGNALING                                              | 22  | 0.565595   | 1.5775759 | 0.015974442 | 0.04885048  |
| GO_REGULATION_OF_CELLULAR_PROTEIN_CATABOLIC_PROCESS             | 142 | 0.410157   | 1.577326  | 0           | 0.04888769  |
| GO_APICAL_JUNCTION_ASSEMBLY                                     | 36  | 0.50050646 | 1.5766693 | 0.017054264 | 0.048892356 |
| GO_NEGATIVE_REGULATION_OF_INNATE_IMMUNE_RESPONSE                | 38  | 0.49379528 | 1.5769926 | 0.012403101 | 0.048928153 |
| KEGG_APOPTOSIS                                                  | 59  | 0.45298764 | 1.5768766 | 0.005873715 | 0.0489317   |
| GO_ENDODERM_FORMATION                                           | 28  | 0.5335855  | 1.5770847 | 0.016447369 | 0.04893599  |
| REACTOME_O_LINKED_GLYCOSYLATION_OF_MUCINS                       | 31  | 0.5168904  | 1.5766835 | 0.020155039 | 0.048946146 |
| GO_CELL_FATE_DETERMINATION                                      | 23  | -0.5682038 | -1.747183 | 0.005141388 | 0.048999537 |
| REACTOME_VESICLE_MEDIATED_TRANSPORT                             | 400 | 0.37280664 | 1.5761992 | 0           | 0.04906452  |
| REACTOME_TCF_DEPENDENT_SIGNALING_IN_RESPONSE_TO_WNT             | 86  | 0.4315425  | 1.575816  | 0.004076087 | 0.049128972 |
| GO_REGULATION_OF_MITOTIC_CELL_CYCLE                             | 330 | 0.3747898  | 1.5759101 | 0           | 0.049150724 |
| GO_PEPTIDE_BIOSYNTHETIC_PROCESS                                 | 306 | 0.3780835  | 1.575217  | 0           | 0.04933479  |
| KEGG_NITROGEN_METABOLISM                                        | 18  | -0.6091809 | -1.742683 | 0           | 0.049377173 |
| REACTOME_O_LINKED_GLYCOSYLATION                                 | 51  | 0.47208104 | 1.5747064 | 0.007173601 | 0.049504288 |
| GO_TRANS_GOLGI_NETWORK                                          | 117 | 0.41975677 | 1.5745336 | 0           | 0.049515404 |
| GO_POSITIVE_REGULATION_OF_INTERLEUKIN_8_PRODUCTION              | 40  | 0.4945122  | 1.5737171 | 0.012139605 | 0.04975425  |
| GO_MEMBRANE_RAFT_ORGANIZATION                                   | 19  | 0.5827545  | 1.5738322 | 0.024875622 | 0.049761828 |
| PID_CDC42_PATHWAY                                               | 42  | 0.491159   | 1.5734025 | 0.013274336 | 0.04983011  |
| KEGG_FOCAL_ADHESION                                             | 139 | 0.40867123 | 1.5730376 | 0.002541296 | 0.049936485 |

Table S3. Blue

| Upstream Regulator | Expr Log Ratio | Molecule Type                     | Predicted Activation State | Bias-corrected z-score | Activation z-score | Bias Term | p-value of overlap | B-H corrected p-value | Target Molecules in Dataset                                                                                                                                                                                                                                                                                                                                                                                                                                                                         |
|--------------------|----------------|-----------------------------------|----------------------------|------------------------|--------------------|-----------|--------------------|-----------------------|-----------------------------------------------------------------------------------------------------------------------------------------------------------------------------------------------------------------------------------------------------------------------------------------------------------------------------------------------------------------------------------------------------------------------------------------------------------------------------------------------------|
| IL1B               | 0,005          | cytokine                          | Inhibited                  | -3,891                 | -5,500             | -0,225    | 5,46E-32           | 1,19E-28              | ADM,ATF3,BTG2,CCN2,CD55,CD83,CDKN1A,CEBPB,CEBPD,CHI3L1,CISH,CYP27B1,DDX5,DUSP1,DUSP5,EFNA1,EGR1,ETS2,F3,FKBP5,FOS,FOSB,FOXO1,GADD45A,GADD45B,GDF15,GEM,HBEGF,HES1,HNF1B,HOMER1,IER2,IER3,IFIT3,IFRD1,IL6R,JUN,JUNB,JUND,KLF10,LDLR,LIFR,MCL1,NAMPT,NFIL3,NFKBIA,NR4A1,NR4A3,PIM1,PTP4A1,RCAN1,RHOB,SERPINE1,SLC20A1,SMAD7,SOCS2,TSC22D3,UA P1,VEGFA,ZFP36                                                                                                                                           |
| beta-estradiol     |                | chemical - endogenous mammalian   | Inhibited                  | -2,462                 | -4,023             | -0,193    | 1,87E-30           | 2,05E-27              | ACKR3,ADM,ATF3,BHLHE40,BTG2,CCN2,CCNA2,CD55,CDKN1A,CDKN1C,CEBPB,CEBPD,CHGB,CHI3L1,CITED2,CYP51A1,DLG3,DUSP1,DUSP5,DUSP6,EFNA1,EGR1,ERF,F3,FOS,FOSB,FOSL2,FOXO1,GADD45A,GADD45B,GEM,GUCY1A1,HBEGF,HES1,HMGCR,HNF1B,HOMER1,IARS1,IER2,IER3,IFRD1,IL6R,JAG1,JUN,JUNB,JUND,KLF10,KLF6,KLF9,LDLR,MAP2K3,MCM2,NAMPT,NEDD9,NFKBIA,NR4A1,NR4A3,PDK4,PPP1R15A,PPP1R3C,PTP4A1,RBBP8,RGS2,RGS3,RND3,RYBP,SERPINE1,SGK1,SLC20A1,SLC38A2,SMAD7,SOCS2,SPRY2,SRSF2,TNFRSF1A,TRIB1,TSC22D3,VEGFA,YWHAZ,ZFP36,ZNF638 |
| TNF                | 0,072          | cytokine                          | Inhibited                  | -4,904                 | -6,526             | -0,201    | 6,91E-30           | 6,03E-27              | ACKR3,ADM,ATF3,BHLHE40,BTG2,BTG3,CCN2,CD55,CD83,CDKN1A,CEBPB,CEBPD,CHI3L1,CISH,CITED2,CRY1,CYP27B1,DDX5,DUSP1,DUSP5,DUSP6,EFNA1,EGR1,ETS2,F3,FOS,FOSB,FOSL2,FOXO1,FZD5,GADD45A,GADD45B,GCLM,GDF15,GEM,HBEGF,HES1,HMGCR,IER2,IER3,IFIT3,JAG1,JUN,JUNB,JUND,KLF10,KLF5,KLF6,LDLR,LIFR,MAFF,MAP2K3,MCL1,NAMPT,NEDD9,NFKBIA,NR4A1,NR4A3,PIM1,PPP1R15A,PPP1R3C,RCAN1,RGS2,RGS3,RHOB,RND3,RRAD,SERPINE1,SGK1,SLC20A1,SMAD7,SOCS2,TFRC,TNFRSF1A,TSC22D3,VEGFA,VMP1,ZFP36                                   |
| TGFB1              |                | growth factor                     | Inhibited                  | -4,599                 | -5,911             | -0,186    | 4,26E-25           | 1,69E-22              | ADM,BHLHE40,CAVIN2,CCN2,CCNA2,CD55,CD83,CDKN1A,CDKN1C,CEBPB,CHI3L1,CITED2,CYP27B1,DDX5,DUSP1,EGR1,ERF,F3,FERMT2,FILIP1L,FOS,FOSB,FOSL2,FOXO1,GADD45A,GADD45B,GDF15,GEM,GNA13,HBEGF,HES1,HNRNPDL,IARS1,IDI1,IER2,IER3,IFIT3,IFRD1,IL6R,JAG1,JUN,JUNB,JUND,KLF10,KLF9,LDLR,LIFR,MAP2K3,MCM2,NAMPT,NEDD9,NFKBIA,NR4A1,NR4A3,PIM1,PPID,PPP1R3C,RHOB,RRAD,RYBP,SERPINE1,SGK1,SLC20A1,SLC39A14,SMAD7,SRSF2,TFRC,TSC22D3,TUBB2A,VEGFA,ZFP36                                                                |
| CREB1              |                | transcription regulator           | Inhibited                  | -4,207                 | -5,328             | -0,200    | 1,06E-24           | 3,85E-22              | ADM,APOLD1,ATF3,BAG3,BHLHE40,BTG2,CCNA2,CDKN1A,CEBPB,CEBPD,CHGB,CYP51A1,DUSP1,EGR1,FOS,FOSB,GADD45A,GADD45B,GEM,HECA,HMGCR,HOMER1,IDI1,IER2,IER3,JUN,JUNB,KLF5,LDLR,MCL1,NFIL3,NR4A1,NR4A3,PER1,PPP1R15A,RGS2,SGK1,SOCS2,TFRC,TIPARP,VEGFA,ZFP36                                                                                                                                                                                                                                                    |
| KRAS               | -0,059         | enzyme                            | Inhibited                  | -2,356                 | -2,364             | -0,002    | 2,39E-24           | 8,01E-22              | ATF3,CAVIN2,CCN2,CCNA2,CDKN1A,CEBPB,CHI3L1,CHSY1,DUSP1,DUSP5,DUSP6,EFNA1,EGR1,EIF5,F3,FOS,FOSB,GADD45A,GCLM,GMN,GNA13,HBEGF,HES1,HNRNPDL,IER3,JUN,JUNB,KLF6,LIPG,NFKBIA,NR4A1,PIM1,RAB20,RHOB,SLC20A1,SLC25A32,SLCO4A1,SPRY2,TRIB1,VEGFA,VMP1,WEE1                                                                                                                                                                                                                                                  |
| NR3C1              | 0,081          | ligand-dependent nuclear receptor |                            | -1,211                 | -1,503             | -0,064    | 1,29E-22           | 3,30E-20              | ADM,BAG3,BHLHE40,CAVIN2,CD83,CDKN1A,CDKN1C,CEBPB,CHIC2,DDX5,DUSP1,EFNA1,EGR1,F3,FKBP5,FOS,FOXO1,GADD45A,GADD45B,GCLM,GEM,IER2,IER3,IFIT2,JADE1,JUN,JUND,KLF9,MCL1,NAMPT,NFIL3,NFKBIA,PER1,PPP1R15A,RGS2,RHOB,SERPINE1,SGK1,SLC19A2,TIPARP,TNFRSF1A,TSC22D3,YWHAZ                                                                                                                                                                                                                                    |
| FSH                |                | complex                           |                            | -0,830                 | -1,566             | -0,178    | 7,20E-21           | 1,49E-18              | ADM,BTG2,CCN2,CD55,CDKN1C,DUSP1,EFNA1,ELL2,FILIP1L,FKBP5,FOS,FOSB,FOSL2,FOXO1,GATA6,GEM,IL6R,JUN,JUNB,KLF10,LDLR,MAP2K3,MCL1,NR4A1,PTP4A1,RHOB,SERPINE1,SGK1,SMAD7,TFRC,TRIB1,VEGFA,ZNF331                                                                                                                                                                                                                                                                                                          |
| CREM               |                | transcription regulator           | Inhibited                  | -2,453                 | -2,951             | -0,116    | 1,01E-20           | 1,92E-18              | APOLD1,ATF3,BHLHE40,BTG2,CEBPB,CYP51A1,DUSP1,EGR1,FOS,GADD45B,HMGCR,IDI1,JUNB,KLF5,LDLR,MCL1,NFIL3,NR4A1,PER1,PPP1R15A,RHOB,TIPARP,VEGFA                                                                                                                                                                                                                                                                                                                                                            |
| TP53               | 0,089          | transcription regulator           | Inhibited                  | -3,479                 | -3,924             | -0,067    | 4,10E-19           | 6,17E-17              | ATF3,BHLHE40,BTG2,CCN2,CCNA2,CCN1,CDKN1A,CEBPB,CEBPD,CITED2,CYP51A1,DDX3X,DDX5,DUSP1,DUSP5,DUSP6,EFNA1,EGR1,EIF2AK3,EIF5,ERF,F3,FERMT2,FKBP5,FOS,FOXO1,GADD45A,GADD45B,GATA6,GDF15,GMN,GNA13,HBEGF,HMGCR,IER3,JUN,JUNB,JUND,KLF6,LDLR,MAP2K3,MCL1,MCM2,MLF2,NAMPT,NFKBIA,PIM1,PPP1R15A,PTP4A1,RHOB,RND3,RRAD,SERPINE1,SGK1,SLC19A2,SMAD7,SOCS2,TFRC,TNFRSF1A,TSC22D3,VEGFA,VMP1,WEE1,ZFP36                                                                                                          |
| IFNG               |                | cytokine                          | Inhibited                  | -2,238                 | -3,894             | -0,233    | 4,39E-19           | 6,39E-17              | ADM,ARG2,ATF3,CCN2,CCNA2,CD55,CD83,CDKN1A,CEBPB,CEBPD,CISH,DDX5,DUSP1,DUSP5,EGR1,ETS2,F3,FKBP5,FOS,FOSB,FOXO1,GDF15,GNA13,HBEGF,HMGCR,IDI1,IER2,IER3,IFIT2,IFIT3,IL6R,JAG1,JUN,JUNB,JUND,KLF10,KLF6,LIFR,MAFF,NAMPT,NEDD9,NFKBIA,PCDH17,PIM1,RAB20,RHOB,SERPINE1,SMAD7,SOCS2,TFRC,TNFRSF1A,TSC22D3,VEGFA,ZFP36,ZNF638                                                                                                                                                                               |

|                  |        |                                                         |           |        |        |        |          |          |                                                                                                                                                                                                                                                                                                        |
|------------------|--------|---------------------------------------------------------|-----------|--------|--------|--------|----------|----------|--------------------------------------------------------------------------------------------------------------------------------------------------------------------------------------------------------------------------------------------------------------------------------------------------------|
| INS              | 0,009  | other                                                   | Inhibited | -2,187 | -2,510 | -0,085 | 4,13E-18 | 5,30E-16 | ADM,CCN2,CDKN1A,CEBPB,CITED2,DUSP1,EGR1,F3,FOS,FOSB,FOSL2,FOXO1,GABARAPL1,HMGCR,IER2,IER3,JUN,JUNB,JUND,NR4A1,VEGFA                                                                                                                                                                                    |
| Growth hormone   |        | group                                                   | Inhibited | -1,330 | -2,448 | -0,241 | 7,49E-18 | 8,88E-16 | CEBPB,CEBPD,CISH,CITED2,CYP27B1,EGR1,FKBP5,FOS,FOSL2,FZD5,GDF15,IER3,JUN,JUNB,KLF10,LDLR,NAMPT,NEDD9,NFKBIA,PDK4,PPP1R15A,SGK1,SOCS2,YWHAZ                                                                                                                                                             |
| IGF2             |        | growth factor                                           |           | -0,664 | -1,103 | -0,225 | 2,88E-17 | 3,07E-15 | CCN2,CDKN1A,CRY1,DUSP1,EGR1,GADD45A,GATA6,HBEGF,IER2,IER3,JUNB,KLF9,MCM2,NFKBIA,PIM1,RHOB,SERPINE1,SLC20A1,SLC38A2,VEGFA,ZFAND5                                                                                                                                                                        |
| ESR1             | 0,031  | ligand-dependent nuclear receptor                       |           | 0,739  | 0,258  | -0,085 | 1,09E-16 | 1,06E-14 | ACKR3,ATF3,CCNA2,CD55,CD83,CDKN1A,CDKN1C,CEBPB,CEBPD,DUSP5,EFNA1,EGR1,F3,FAM102A,FOS,FOSB,FOSL2,FOXO1,GADD45B,GDF15,GEM,GNA13,GUCY1A1,HBEGF,HMGCR,IER3,IFRD1,JUN,JUNB,JUND,LDLR,LIFR,NEDD9,NFKBIA,PDK4,PPP1R3C,RGS3,RND3,SERPINE1,SGK1,SLC38A2,SOCS2,STEAP1,TACC1,TFRC,TRIB1,TSC22D3,TSPYL2,VEGFA,WEE1 |
| progesterone     |        | chemical - endogenous mammalian transcription regulator | Inhibited | -1,647 | -2,385 | -0,143 | 3,95E-16 | 3,38E-14 | ADM,ATF3,BHLHE40,CCNA2,CDKN1A,CEBPB,CEBPD,CITED2,EFNA1,EGR1,ELL2,F3,FKBP5,FOS,FOXO1,GABARAPL1,HBEGF,HMGCR,IL6R,JUN,KLF10,KLF5,KLF9,MAP2K3,MCM2,NEDD9,NFIL3,NFKBIA,NR4A1,SGK1,STEAP1,TIPARP,TNFRSF1A,VEGFA                                                                                              |
| NFKBIA           | -0,778 |                                                         | Inhibited | -2,130 | -2,939 | -0,164 | 6,56E-16 | 5,30E-14 | ACKR3,BTG2,CCNA2,CDKN1A,CEBPB,CEBPD,CHI3L1,DDX3X,DUSP6,F3,FOS,GADD45A,GADD45B,HES1,IER3,JUN,JUNB,KLF5,LIFR,NFKBIA,NR4A1,PIM1,RCAN1,RGS3,SGK1,TFRC,VEGFA,YWHAZ,ZNF638                                                                                                                                   |
| Akt              |        | group                                                   |           | 1,054  | 0,160  | -0,194 | 1,12E-15 | 8,85E-14 | ADM,AMOT,BHLHE40,BTG2,CCN2,CDKN1A,CDKN1C,CEBPB,F3,FKBP5,FOS,FOXO1,HES1,IER3,JUN,MCL1,NFIL3,NFKBIA,PDK4,RHOB,SERPINE1,SGK1,TIPARP,VEGFA                                                                                                                                                                 |
| ADRB             |        | group                                                   |           | -0,161 | 0,639  | 0,191  | 3,64E-15 | 2,69E-13 | ATF3,BHLHE40,CAVIN2,CCNA2,CDKN1A,CYP51A1,FOS,GADD45A,GCLM,GDF15,IFIT3,JUN,JUNB,NFKBIA,NR4A1,NR4A3,SLCO4A1,WE E1                                                                                                                                                                                        |
| FAS              | -0,014 | transmembrane receptor                                  | Activated | 2,088  | 2,197  | 0,036  | 6,66E-15 | 4,47E-13 | BTG3,CCN2,CD83,CDKN1A,CEBPD,EFNA1,EGR1,F3,FOS,FOSB,FOXO1,IER3,JUN,JUND,LDLR,NFKBIA,NR4A1,PPP1R15A,PTP4A1,RGS3,SERPINE1,TFRC,TNFRSF1A,TRIB1,VEGFA,ZFP36                                                                                                                                                 |
| prostaglandin E2 |        | chemical - endogenous mammalian growth factor           | Inhibited | -1,919 | -2,805 | -0,212 | 9,06E-15 | 5,99E-13 | ATF3,CCN2,CD55,CD83,CDKN1A,CEBPB,CEBPD,DUSP1,EGR1,FOS,FOSB,FOSL2,FOXO1,IER3,JUN,MCL1,NEDD9,NFIL3,NFKBIA,NR4A1,RGS2,SOCS2,TSC22D3,VEGFA                                                                                                                                                                 |
| NRG1             |        |                                                         | Inhibited | -1,400 | -2,026 | -0,244 | 1,17E-14 | 7,61E-13 | CCN2,CDKN1A,DUSP1,DUSP6,EGR1,FOS,FOSB,HES1,HMGCR,IDI1,IER2,IER3,JUN,JUNB,JUND,LIFR,MCL1,NR4A1,NR4A3,VEGFA,ZFP36                                                                                                                                                                                        |
| FOXO3            | -0,179 | transcription regulator                                 | Inhibited | -3,163 | -3,567 | -0,090 | 2,38E-14 | 1,46E-12 | CCN2,CDKN1A,CDKN1C,EGR1,FOS,FOSB,FOXO1,GABARAPL1,GADD45A,GADD45B,GMN,HMGCR,IARS1,IER3,JAG1,JUNB,MCM2,NAMPT,NFKBIA,PPP1R15A,SERPINE1,SGK1,TNFRSF1A,VEGFA                                                                                                                                                |
| OSM              |        | cytokine                                                | Inhibited | -3,500 | -4,701 | -0,230 | 2,49E-14 | 1,49E-12 | ARF6,ATF3,BAIAP2,BHLHE40,CDKN1A,CEBPD,CHD1,CHI3L1,CISH,CRY1,EGR1,ETS2,F3,FOS,FOSB,HBEGF,IARS1,IER3,IL6R,JAG1,JUN,JUNB,KLF10,LDLR,LIFR,NAMPT,PTP4A1,SERPINE1,UAP1,VEGFA,ZFP36                                                                                                                           |
| Raf              |        | group                                                   |           | -1,518 | -1,948 | -0,221 | 1,13E-13 | 6,18E-12 | CDKN1A,DUSP6,EGR1,FOS,GDF15,IER2,IER3,JUN,MAFF,MCL1,RND3,SLC20A1,SPRY2                                                                                                                                                                                                                                 |
| MAPK1            | -0,012 | kinase                                                  | Inhibited | -3,694 | -3,730 | -0,007 | 1,27E-13 | 6,84E-12 | ARG2,ATF3,CCN2,CDKN1A,CISH,DUSP1,EGR1,FOS,FOSB,FOSL2,GMN,HOMER1,IFIT2,IFIT3,JUN,JUNB,JUND,MCL1,NR4A1,RGS2,SOC S2,SPRY2,UTP18,ZNF184                                                                                                                                                                    |
| Insulin          |        | group                                                   | Inhibited | -2,774 | -3,579 | -0,168 | 2,37E-13 | 1,22E-11 | ARG2,ATF3,CCN2,CDKN1A,CEBPB,DUSP1,EGR1,FOS,FOSB,FOXO1,HES1,HMGCR,IFIT2,IFIT3,JUN,NFIL3,NFKBIA,NR4A1,NR4A3,PDK4,PPP1R15A,SERPINE1,SGK1,SLC38A2,SLC39A14,SMAD7,VEGFA                                                                                                                                     |
| TP63             |        | transcription regulator                                 | Inhibited | -2,228 | -3,246 | -0,246 | 2,38E-13 | 1,22E-11 | ADM,ADRM1,BHLHE40,CCNA2,CDKN1A,CDKN1C,CITED2,DUSP6,F3,FOS,GADD45A,HBEGF,HES1,IER3,JAG1,JUNB,KLF6,MAFF,MAP2K3,RBBP8,SERPINE1,TNFRSF1A,VEGFA,VMP1,WEE1                                                                                                                                                   |
| FOXO4            | -0,086 | transcription regulator                                 | Inhibited | -2,453 | -2,145 | 0,090  | 4,70E-13 | 2,28E-11 | CCN2,CDKN1A,CYP51A1,GADD45A,GADD45B,HMGCR,IDI1,IER3,JAG1,NAMPT,SERPINE1,SGK1,VEGFA,ZFAND5                                                                                                                                                                                                              |
| CEBPA            | 0,144  | transcription regulator                                 |           | -0,365 | -1,172 | -0,196 | 4,93E-13 | 2,36E-11 | ARG2,BTG2,CCNA2,CDKN1A,CEBPB,CEBPD,CHI3L1,FOS,FOXO1,GADD45A,GATA6,HMGCR,HNF1B,IER3,IL6R,JUN,JUNB,KLF5,NFIL3,PPP1R3C,RGS2,SERPINE1,TNFRSF1A,TRIB1,TSC22D3,TUBB2A                                                                                                                                        |
| Mek              |        | group                                                   | Inhibited | -2,561 | -3,265 | -0,200 | 1,37E-12 | 5,84E-11 | CCN2,CDKN1A,DUSP5,DUSP6,EGR1,FOS,GDF15,HOMER1,IER2,IER3,JUN,JUNB,MAFF,MCL1,NR4A1,RND3,SERPINE1,SLC20A1,SPRY2                                                                                                                                                                                           |
| HRAS             | -0,041 | enzyme                                                  |           | -0,581 | -1,353 | -0,177 | 2,50E-12 | 1,03E-10 | ADM,ARF6,BTG2,CCN2,CCNA2,CDKN1A,CEBPB,CEBPD,CISH,DUSP1,DUSP6,EGR1,FERMT2,FOS,FOSB,FOSL2,FOXO1,GNA13,HES1,JUN,JUNB,KLF5,KLF6,LIPG,NFKBIA,RHOB,SERPINE1,SOCS2,SPRY2,VEGFA                                                                                                                                |
| NUPR1            | 0,033  | transcription regulator                                 | Inhibited | -4,808 | -3,922 | 0,174  | 6,38E-12 | 2,42E-10 | ADM,ATF3,AVP1,CCNA2,CEBPB,CITED2,DUSP5,ELL2,GADD45A,GDF15,HBEGF,IFIT2,IL6R,JOSD1,KLF6,LMAN2L,NFIL3,PIM1,PPP1R15A,RAB20,RYBP,SERPINE1,SPTSSA,TRIB1,UAP1,WDCP                                                                                                                                            |

|                    |        |                                         |           |        |        |        |          |          |                                                                                                                                                                                                                                                                                    |
|--------------------|--------|-----------------------------------------|-----------|--------|--------|--------|----------|----------|------------------------------------------------------------------------------------------------------------------------------------------------------------------------------------------------------------------------------------------------------------------------------------|
| ethanol            |        | chemical - endogenous mammalian         | Inhibited | -1,485 | -2,214 | -0,164 | 6,75E-12 | 2,51E-10 | ACKR3,ADM,ATF3,CCN2,CDKN1A,CEBPB,CEBPD,DUSP1,DUSP6,EGR1,FOS,FOSB,FOSL2,GADD45A,JUN,KLF6,PPP1R3C,PRKRA,RHOB,SERPINE1,SGK1,TSC22D3,WEE1                                                                                                                                              |
| tretinoin          |        | chemical - endogenous mammalian         |           | -0,206 | -1,384 | -0,195 | 1,01E-11 | 3,74E-10 | ADM,BHLHE40,BTG2,CCN2,CCNA2,CDKN1A,CEBPB,CHGB,CITED2,DNAAF2,DUSP1,EGR1,EIF5,F3,FOS,FOSL2,GATA6,GDF15,GMNN,GNA13,HBEGF,HES1,HNF1B,IER3,IFIT2,IFIT3,IL6R,JUN,KLF5,KLF9,MAP2K3,MCL1,MLF2,NDUFAF4,PIM1,PNRC1,RAE1,SERPINE1,SLC38A2,SMAD7,TFRC,TNFRSF1A,TSC22D3,VEGFA,VMP1,YWHAZ,ZFAND5 |
| D-glucose          |        | chemical - endogenous mammalian         | Inhibited | -2,387 | -3,226 | -0,173 | 1,31E-11 | 4,77E-10 | ATF3,CCN2,CD55,CDKN1A,CEBPB,DUSP1,EGR1,EIF2AK3,FOS,GABARAPL1,GDF15,HMGCR,IER2,JAG1,JUN,JUNB,KLF10,LDLR,MCL1,NAMPT,NR4A1,NR4A3,RGS2,SERPINE1,SGK1,SLC39A14,SRSF2,TFR3,VEGFA                                                                                                         |
| MAPK8              | 0,000  | kinase                                  | Inhibited | -1,370 | -2,230 | -0,226 | 1,48E-11 | 5,29E-10 | CCN2,CCNA2,CDKN1A,CEBPB,DUSP1,DUSP6,EGR1,FOS,FOSL2,FOXO1,GADD45A,JUN,JUND,KLF6,TSC22D3,ZFP36                                                                                                                                                                                       |
| CDKN2A             |        | transcription regulator                 |           | -0,288 | -0,082 | 0,054  | 1,85E-11 | 6,41E-10 | BTG2,BTG3,CCN2,CCNA2,CDKN1A,CEBPB,CEBPD,CITED2,DDX5,DUSP1,EFNA1,EGR1,FOS,GNA13,JUN,MCL1,SERPINE1,SLBP,TNFRSF1A,VEGFA                                                                                                                                                               |
| LIF                | -0,118 | cytokine                                | Inhibited | -2,483 | -3,059 | -0,153 | 5,75E-11 | 1,86E-09 | CCNA2,CDKN1A,CEBPB,CEBPD,CISH,EGR1,FOS,GATA6,HBEGF,HES1,JUN,JUNB,KLF10,LIFR,PIM1,SOCS2,VEGFA                                                                                                                                                                                       |
| nitric oxide       |        | chemical - endogenous mammalian         | Inhibited | -2,120 | -2,861 | -0,214 | 6,35E-11 | 2,04E-09 | ATF3,CCN2,CDKN1A,DUSP1,DUSP6,EGR1,FOS,GADD45A,GCLM,IER3,JUN,JUNB,SGK1,TFRC,VEGFA                                                                                                                                                                                                   |
| MAPK9              |        | kinase                                  |           | 0,113  | -0,758 | -0,248 | 9,04E-11 | 2,84E-09 | CCN2,CDKN1A,CEBPB,EGR1,FOS,FOSL2,GADD45A,GADD45B,IER2,JUN,JUNB,JUND,KLF6,PPP1R15A,ZFP36                                                                                                                                                                                            |
| GH1                |        | growth factor                           | Inhibited | -2,559 | -2,907 | -0,103 | 1,31E-10 | 4,00E-09 | ATF3,CEBPB,CEBPD,CISH,EGR1,FOS,GADD45A,JUN,JUNB,LDLR,SOCS2,TNFRSF1A,ZFP36                                                                                                                                                                                                          |
| L-triiodothyronine |        | chemical - endogenous mammalian         |           | 1,640  | 0,897  | -0,173 | 3,26E-10 | 9,22E-09 | ADM,CCN2,CDKN1A,CHD1,CYP27B1,DUSP1,DUSP5,EFNA1,EGR1,ERTF1,FOS,GDF15,HOMER1,KLF9,LDLR,NR4A1,PDK4,PER1,RGS2,SERPINE1,SMAD7                                                                                                                                                           |
| PTEN               | 0,088  | phosphatase                             |           | 1,236  | 1,301  | 0,015  | 3,47E-10 | 9,75E-09 | ADM,ATF3,BTG2,CDKN1A,CEBPB,CITED2,DUSP1,ETS2,F3,FOS,FOXO1,HMGCR,IDI1,IFRD1,JAG1,JUND,KLF5,KLF6,MCL1,NFIL3,PIM1,SERPINE1,SLC20A1,SPRY2,STEAP1,TSC22D3,VEGFA                                                                                                                         |
| KLF2               | -0,138 | transcription regulator                 | Activated | 1,999  | 2,344  | 0,099  | 3,95E-10 | 1,10E-08 | ACKR3,ADM,CCN2,CD55,CDKN1A,EFNA1,F3,GADD45A,IL6R,JUNB,NFKBIA,RGS3,SERPINE1,TFRC,WEE1                                                                                                                                                                                               |
| MYC                | -0,549 | transcription regulator                 |           | 0,270  | -0,724 | -0,205 | 5,51E-10 | 1,47E-08 | ADM,CCNA2,CDKN1A,CEBPD,DDX3X,DDX5,DUSP1,DUSP5,DUSP6,EGR1,F3,FKBP5,FOS,GADD45A,GADD45B,GATA6,GCLM,HES1,IER3,IFIT2,IFIT3,JUN,KLF10,KLF6,MCL1,MFAP1,NFKBIA,PPID,RHOB,SERPINE1,SGK1,SRSF2,TFRC,VEGFA,YRDC,ZFP36                                                                        |
| TP73               | 0,061  | transcription regulator                 | Inhibited | -1,343 | -2,103 | -0,170 | 7,39E-10 | 1,91E-08 | ADM,BHLHE40,BTG2,CCNA2,CD55,CD83,CDKN1A,CDKN1C,EGR1,GADD45A,HBEGF,HES1,IER3,JAG1,KLF5,MIR22HG,PNRC1,SERPINE1,TNFRSF1A,VEGFA,VMP1                                                                                                                                                   |
| NELFB              | -0,014 | other ligand-dependent nuclear receptor | Activated | 2,212  | 2,449  | 0,097  | 7,56E-10 | 1,93E-08 | ATF3,CCN2,CDKN1A,GADD45A,GADD45B,VEGFA                                                                                                                                                                                                                                             |
| ESR2               |        | transcription regulator                 |           | -1,115 | -1,373 | -0,093 | 7,81E-10 | 1,98E-08 | ATF3,CCN2,CCNA2,CDKN1A,CDKN1C,CEBPD,EGR1,FOS,FOXO1,GADD45B,JAG1,JUNB,MAP2K3,NEDD9,NFKBIA,PDK4,PPP1R3C,SERPINE1,SGK1,SMAD7,SOCS2,TRIB1,VEGFA                                                                                                                                        |
| ID2                | -0,211 | transcription regulator                 | Inhibited | -2,162 | -2,111 | 0,015  | 8,33E-10 | 2,09E-08 | ADM,BTG2,CD83,CDKN1A,CEBPB,DUSP1,ETS2,FOXO1,GADD45B,IL6R,KLF6,NR4A1,NR4A3,SMAD7,TNFRSF1A                                                                                                                                                                                           |
| LEP                | 0,022  | growth factor                           |           | -0,592 | -1,551 | -0,232 | 8,86E-10 | 2,20E-08 | CCNA2,CDKN1A,CEBPB,CYP27B1,DUSP6,EGR1,F3,FOS,GADD45A,HES1,HMGCR,JUN,JUNB,JUND,LDLR,LIFR,MCL1,NAMPT,SERPINE1,TNFRSF1A,VEGFA,ZFP36                                                                                                                                                   |
| TGFB2              |        | growth factor                           | Inhibited | -1,414 | -2,108 | -0,226 | 1,16E-09 | 2,80E-08 | ALX1,BHLHE40,CCN2,EGR1,FOS,HBEGF,JAG1,LIPG,PDK4,RGS3,SERPINE1,VEGFA                                                                                                                                                                                                                |
| ID3                | 0,127  | transcription regulator                 |           | -2,066 | -1,943 | 0,038  | 1,37E-09 | 3,26E-08 | ADM,BTG2,CD83,CDKN1A,CEBPB,DUSP1,ETS2,FOXO1,GADD45B,IL6R,KLF6,NR4A1,NR4A3,SMAD7,TNFRSF1A                                                                                                                                                                                           |
| CSF3               | 0,069  | cytokine                                | Inhibited | -2,358 | -2,909 | -0,162 | 2,45E-09 | 5,48E-08 | CEBPB,CISH,DUSP6,EGR1,FOS,GADD45A,GADD45B,JUN,MCL1,NFIL3,PIM1,TFRC,TNFRSF1A,VEGFA                                                                                                                                                                                                  |
| BDNF               | 0,075  | growth factor                           | Inhibited | -2,235 | -3,055 | -0,235 | 2,60E-09 | 5,78E-08 | BAG3,BHLHE40,CDKN1A,DUSP1,DUSP6,EGR1,FOS,FOSB,HMGCR,HOMER1,IFRD1,JUN,KLF10,NR4A1,NR4A3,SPRY2,TFRC,TIPARP                                                                                                                                                                           |
| AHR                | -0,077 | ligand-dependent nuclear receptor       |           | -1,697 | -1,921 | -0,068 | 3,42E-09 | 7,46E-08 | ADM,ARG2,BTG2,CCNA2,CDKN1A,DUSP6,FOS,GADD45A,HES1,HMGCR,JAG1,JUN,JUNB,NEDD9,PPP1R15A,SERPINE1,TIPARP,TSPYL2,VEGFA                                                                                                                                                                  |
| IL10               |        | cytokine                                |           | -0,679 | -0,915 | -0,056 | 4,69E-09 | 9,78E-08 | ADM,ARG2,CD55,CD83,CDKN1A,DUSP1,ETS2,F3,FKBP5,FOS,IFIT2,JUN,NEDD9,NR4A3,TFRC,TNFRSF1A,TSC22D3,VEGFA,ZFP36                                                                                                                                                                          |

|                           |        |                                   |           |        |        |        |          |          |                                                                                                                                                                                                                                                                                                            |
|---------------------------|--------|-----------------------------------|-----------|--------|--------|--------|----------|----------|------------------------------------------------------------------------------------------------------------------------------------------------------------------------------------------------------------------------------------------------------------------------------------------------------------|
| SFTPA1                    |        | transporter                       | Activated | 2,470  | 3,162  | 0,219  | 5,64E-09 | 1,17E-07 | AMOT,CCN2,EGR1,FOS,FOSB,GUCY1A1,HBEGF,NAMPT,PKK4,SERPINE1                                                                                                                                                                                                                                                  |
| PDX1                      |        | transcription regulator           | Inhibited | -2,385 | -2,885 | -0,145 | 6,16E-09 | 1,26E-07 | ATF3,CHGB,DUSP5,DUSP6,EFNA1,EGR1,F3,GCLM,IER3,JUN,JUNB,KLF10,KLF6,PTP4A1                                                                                                                                                                                                                                   |
| glutamine                 |        | chemical - endogenous mammalian   |           | 0,429  | 0,970  | 0,184  | 6,66E-09 | 1,36E-07 | CEBPB,DUSP1,FOS,GADD45A,JUN,JUNB,MCL1,NFKBIA,NR4A1,SRSF2,VEGFA                                                                                                                                                                                                                                             |
| FOS                       | -1,659 | transcription regulator           |           | -0,182 | -0,706 | -0,154 | 6,93E-09 | 1,41E-07 | ATF3,ATF7IP,CCN2,CCNA2,CHI3L1,DDX3X,EGR1,F3,FOS,FOSB,FZD5,JUN,JUNB,KLF6,NFIL3,NR4A1,PTP4A1,SERPINE1,SMAD7,TIPARP,VEGFA,WEE1,YWHAZ                                                                                                                                                                          |
| TNFRSF1A                  | -0,309 | transmembrane receptor            |           | -0,069 | -0,523 | -0,139 | 7,15E-09 | 1,44E-07 | CCN2,CD83,CDKN1A,CEBPB,EFNA1,GCLM,IER3,JUN,PIM1,SERPINE1,TFRC,TNFRSF1A,VEGFA                                                                                                                                                                                                                               |
| VHL                       |        | transcription regulator           |           | 0,260  | 0,765  | 0,211  | 9,97E-09 | 1,92E-07 | BHLHE40,CCN2,CDKN1A,CDKN1C,EIF5,F3,FILIP1L,IER3,JADE1,NEDD9,TFRC,VEGFA                                                                                                                                                                                                                                     |
| NR3C2                     | 0,012  | ligand-dependent nuclear receptor |           | -1,303 | -1,723 | -0,142 | 9,97E-09 | 1,92E-07 | CCN2,EGR1,FKBP5,GUCY1A1,JUNB,KLF9,RGS2,RRAD,SERPINE1,SGK1,TSC22D3,VEGFA                                                                                                                                                                                                                                    |
| STAT6                     |        | transcription regulator           | Inhibited | -1,907 | -2,266 | -0,097 | 1,06E-08 | 2,03E-07 | APOLD1,CDKN1A,CISH,DNAF2,EGR1,FKBP5,GADD45B,HMGR,IER2,IFIT3,JAG1,LIFR,NEDD9,NFIL3,NFKBIA,PKK4,SERPINE1,SOCS2,ZFP36                                                                                                                                                                                         |
| Immunoglobulin            |        | complex                           |           | -0,381 | -0,403 | -0,005 | 1,07E-08 | 2,03E-07 | ADM,CD83,CDKN1C,CEBPD,CISH,CYP27B1,DUSP1,EGR1,EIF2AK3,ETS2,F3,FOS,FOSB,MAFF,NAMPT,NFIL3,NFKBIA,NR4A1,PKK4,RGS2,TFRC,VEGFA                                                                                                                                                                                  |
| SRF                       |        | transcription regulator           |           | 0,448  | -0,090 | -0,213 | 1,18E-08 | 2,21E-07 | APOLD1,CCN2,CDKN1A,CEBPD,DUSP5,EGR1,FERMT2,FILIP1L,FOS,FOSB,GADD45A,IER2,JUN,JUNB,LDLR,MCL1,NR4A1,RND3                                                                                                                                                                                                     |
| Hdac                      |        | group                             | Activated | 2,327  | 2,467  | 0,040  | 1,20E-08 | 2,24E-07 | ATF3,CDKN1A,EGR1,FOS,GADD45B,HNF1B,IL6R,JUN,KLF10,KLF6,KLF9,NR4A1,SPRY2                                                                                                                                                                                                                                    |
| WT1                       | -0,178 | transcription regulator           |           | -1,018 | -1,256 | -0,079 | 1,32E-08 | 2,45E-07 | BTG2,CCN2,CDKN1A,DDX3X,EFNA1,EGR1,FOSB,HBEGF,IDI1,JUNB,JUND,MCL1,SERPINE1,SLC20A1,VEGFA                                                                                                                                                                                                                    |
| NFATC2                    |        | transcription regulator           |           | 1,839  | 1,026  | -0,249 | 1,36E-08 | 2,48E-07 | CCNA2,CD83,CDKN1A,CISH,CITED2,IER3,IFIT2,IFIT3,JUN,NFKBIA,NR4A1,RCAN1,RGS2,SOCS2                                                                                                                                                                                                                           |
| SMAD4                     |        | transcription regulator           | Inhibited | -2,724 | -3,527 | -0,228 | 1,75E-08 | 3,12E-07 | CCN2,CDKN1A,CITED2,FOS,GADD45A,GADD45B,IER3,JAG1,NAMPT,NFKBIA,SERPINE1,SGK1,SMAD7,VEGFA,ZFP36                                                                                                                                                                                                              |
| butyric acid              |        | chemical - endogenous mammalian   |           | -0,696 | -0,890 | -0,056 | 2,20E-08 | 3,81E-07 | CCNA2,CD83,CDKN1A,CDKN1C,DUSP1,FOS,GADD45A,GATA6,IFIT3,KLF5,MCL1,NAMPT,NDUFAF4,NFKBIA,NR4A1,SERPINE1,SGK1,SRSF2,VEGFA,WEE1                                                                                                                                                                                 |
| oleic acid                |        | chemical - endogenous mammalian   |           | -0,114 | -0,588 | -0,152 | 2,32E-08 | 3,98E-07 | DUSP1,FOS,GADD45A,GADD45B,GDF15,HMGR,LDLR,NFKBIA,NR4A1,PKK4,SERPINE1                                                                                                                                                                                                                                       |
| STAT5A                    | -0,073 | transcription regulator           |           | -1,444 | -1,803 | -0,122 | 3,04E-08 | 5,07E-07 | CDKN1A,CEBPB,CISH,CYP27B1,DUSP5,FOS,FOSB,FOSL2,GADD45A,IL6R,KLF10,MCL1,PIM1,SOCS2,TNFRSF1A,ZFP36                                                                                                                                                                                                           |
| 15-deoxy-delta-12,14-PGJ2 |        | chemical - endogenous mammalian   |           | -1,245 | -0,569 | 0,192  | 3,58E-08 | 5,83E-07 | CCN2,CDKN1A,CEBPD,EGR1,FOS,GADD45A,GCLM,GDF15,JUN,MCL1,NFKBIA,SERPINE1,VEGFA                                                                                                                                                                                                                               |
| arachidonic acid          |        | chemical - endogenous mammalian   | Inhibited | -1,752 | -2,053 | -0,099 | 5,66E-08 | 8,69E-07 | CD83,EGR1,F3,FOS,JUN,KLF6,LDLR,NFKBIA,RGS2,TNFRSF1A                                                                                                                                                                                                                                                        |
| HNF4A                     | 0,020  | transcription regulator           |           | -0,444 | -0,881 | -0,133 | 6,00E-08 | 9,18E-07 | ARG2,AVP1,CCNA2,CD55,CDKN1A,CEBPB,CEBPD,CHI3L1,CHIC2,CQO10B,CRY1,CUTC,CYP51A1,DUSP6,EFNA1,EGR1,EIF5,FOSL2,FOXO1,GADD45B,GATA6,GDF15,HBEGF,HNF1B,HNRNPA0,JUN,JUNB,LDLR,LMAN2L,NAMPT,PKK4,POGLUT2,PPP1R3C,SERPINE1,SERTA D3,SGK1,SLC25A32,SPTSSA,SRSF2,TFRC,TMEM140,TXNL4B,UBE2M,UTP18,VMP1,WDCP,WDR13,ZFP36 |
| IL3                       |        | cytokine                          | Inhibited | -1,843 | -2,287 | -0,151 | 6,02E-08 | 9,18E-07 | BHLHE40,CDKN1A,CISH,EGR1,FOS,MCL1,NFIL3,PIM1,TNFRSF1A                                                                                                                                                                                                                                                      |
| HDAC1                     | -0,015 | transcription regulator           |           | -0,533 | -0,244 | 0,094  | 6,52E-08 | 9,84E-07 | ATF3,CAVIN2,CCNA2,CDKN1A,DUSP1,EGR1,FOS,GABARAPL1,HES1,NFKBIA,RHOB,SERPINE1,SGK1,SMAD7,TSC22D3                                                                                                                                                                                                             |

|                             |        |                                       |           |        |        |        |          |          |                                                                                                                                       |
|-----------------------------|--------|---------------------------------------|-----------|--------|--------|--------|----------|----------|---------------------------------------------------------------------------------------------------------------------------------------|
| RB1                         | -0,015 | transcription regulator               |           | -0,182 | -0,588 | -0,125 | 6,60E-08 | 9,90E-07 | BTG3,CCN2,CCNA2,CDKN1A,CITED2,CYP27B1,EGR1,F3,FOS,GMN N,HOMER1,MAP2K3,MCM2,MFAP1,PIM1,SERPINE1,SLBP,VEGFA,ZNF638                      |
| IL13                        | -0,012 | cytokine                              | Inhibited | -1,459 | -2,448 | -0,246 | 9,12E-08 | 1,32E-06 | ACKR3,ARG2,ATF3,AVP1,CCN2,CEBPB,CHI3L1,CISH,EGR1,F3,IAR S1,JAG1,JUN,KLF6,MCL1,SERPINE1,TFRC,TNFRSF1A                                  |
| Lh                          |        | complex                               | Inhibited | -2,161 | -2,577 | -0,161 | 2,17E-07 | 2,89E-06 | CD55,CDKN1C,DUSP1,FKBP5,FOS,GEM,MAP2K3,MCL1,PER1,PTP4 A1,RHOB,SGK1,TRIB1,VEGFA                                                        |
| BRCA1                       |        | transcription regulator               |           | 1,153  | 0,578  | -0,178 | 2,43E-07 | 3,20E-06 | CDKN1A,EGR1,FKBP5,FOXO1,GADD45A,GADD45B,GDF15,IFIT2,IFIT3,NEDD9,VEGFA,WEE1                                                            |
| RASSF1                      |        | other                                 |           | -0,484 | -0,765 | -0,096 | 2,91E-07 | 3,77E-06 | BHLHE40,CCNA2,CDKN1A,EGR1,FOS,GDF15,HBEGF,KLF10,TUBB2 A                                                                               |
| SMAD7                       | -0,352 | transcription regulator               |           | 0,428  | 0,919  | 0,164  | 2,99E-07 | 3,86E-06 | CCN2,CCNA2,CDKN1A,CITED2,FOXO1,GADD45A,HBEGF,NFKBIA,SERPINE1,SMAD7,VEGFA                                                              |
| palmitic acid               |        | chemical - endogenous mammalian       | Inhibited | -1,304 | -2,103 | -0,235 | 3,59E-07 | 4,52E-06 | ATF3,CCN2,CDKN1A,FOS,FOXO1,GDF15,IL6R,MCL1,NFKBIA,NR4A1,NR4A3,PKK4,SERPINE1                                                           |
| NOTCH1                      |        | transcription regulator               |           | -0,360 | -0,592 | -0,078 | 4,19E-07 | 5,22E-06 | CCN2,CDKN1A,CDKN1C,CEBPB,CEBPD,EPHA4,FOS,FOSB,HES1,JAG1,RND3,SERPINE1,SPRY2,VEGFA                                                     |
| TCF4                        | 0,086  | transcription regulator               |           | 2,390  | 1,796  | -0,165 | 5,03E-07 | 6,21E-06 | BHLHE40,CCNA2,CD55,CDKN1A,CDKN1C,FOS,FOXO1,HES1,JAG1,JUN,MCL1,NEDD9,PPID,SGK1,SMAD7,TFAM140,YWHAZ                                     |
| NGFR                        |        | transmembrane receptor                |           | 0,186  | -0,314 | -0,228 | 5,15E-07 | 6,33E-06 | CCNA2,FOS,JUN,LDLR,RHOB,SERPINE1                                                                                                      |
| 15(S)-HETE                  |        | chemical - endogenous mammalian group | Inhibited | -2,054 | -2,215 | -0,073 | 6,88E-07 | 8,25E-06 | EGR1,F3,FOSB,HMGR,JUN                                                                                                                 |
| estrogen receptor dinoprost |        | chemical - endogenous mammalian       |           | 0,352  | 0,389  | 0,011  | 7,88E-07 | 9,36E-06 | CCN2,EGR1,FOS,HBEGF,JAG1,JUN,KLF10,LDLR,NEDD9,RGS2,SERPINE1,TSC22D3,VEGFA                                                             |
| levodopa                    |        | chemical - endogenous mammalian       | Inhibited | -1,383 | -1,939 | -0,216 | 9,24E-07 | 1,08E-05 | ADM,FOS,FOSL2,JUN,NFIL3,NR4A1,VEGFA,YWHAZ                                                                                             |
| STAT5B                      |        | transcription regulator               |           | -2,734 | -3,031 | -0,065 | 1,00E-06 | 1,15E-05 | ARG2,DUSP1,DUSP6,ETS2,FKBP5,FOS,FOSB,FOXO1,GABARAPL1,GADD45B,GNA13,GUCY1A1,HBEGF,HOMER1,IER3,JUNB,KLF6,KLF9,PER1,SLC29A3,SLC38A2,VMP1 |
| SETD2                       |        | enzyme                                |           | 0,511  | 0,302  | -0,063 | 1,04E-06 | 1,19E-05 | BAIAP2,CDKN1A,CISH,FOS,FOSL2,GADD45A,GADD45B,MCL1,PKK4,PIM1,PPP1R3C,SOCS2,TNFRSF1A,ZFP36                                              |
| ACVRL1                      | 0,049  | kinase                                |           | 0,206  | 0,816  | 0,249  | 1,10E-06 | 1,24E-05 | CCN2,CITED2,GNA13,JUN,RHOB,SERPINE1                                                                                                   |
| PPARG                       | 0,078  | ligand-dependent nuclear receptor     |           | 1,358  | 1,000  | -0,179 | 1,31E-06 | 1,45E-05 | CDKN1A,EFNA1,GDF15,SERPINE1,SMAD7,VEGFA                                                                                               |
| CNTF                        |        | cytokine                              |           | -1,243 | -1,835 | -0,169 | 1,58E-06 | 1,73E-05 | CAVIN2,CCN2,CDKN1A,CEBPB,GDF15,HES1,HMGR,JUN,KLF6,LDLR,NR4A1,PKK4,RAB20,RHOB,SERPINE1,SGK1,TSC22D3,VEGFA                              |
| DUSP1                       | -1,398 | phosphatase                           |           | -0,749 | -0,958 | -0,106 | 1,65E-06 | 1,80E-05 | CEBPD,CISH,EGR1,FOS,JUNB,LIFR,SOCS2,ZFP36                                                                                             |
| ERBB4                       | 0,074  | kinase                                |           | 1,506  | 1,614  | 0,037  | 1,98E-06 | 2,12E-05 | DUSP1,DUSP6,GDF15,IER3,IFIT3,JUN,PNRC1,SERPINE1,ZFP36                                                                                 |
| RHOA                        | 0,007  | enzyme                                |           | 0,002  | -0,113 | -0,041 | 2,36E-06 | 2,49E-05 | BTG2,CDKN1A,DUSP1,EGR1,GADD45A,HBEGF,JUN,MAP2K3                                                                                       |
| NR1H3                       | 0,002  | ligand-dependent nuclear receptor     |           | -1,194 | -1,701 | -0,205 | 2,36E-06 | 2,49E-05 | CCN2,CDKN1A,CEBPB,FOS,GDF15,JUN,RHOB,RND3                                                                                             |
| Ins1                        |        | other                                 | Inhibited | -0,081 | -0,299 | -0,079 | 2,47E-06 | 2,60E-05 | ARG2,ATF3,CCNA2,CD55,CDKN1A,HMGR,IFIT2,LDLR,MYLIP,NFKBIA,TRIB1,VEGFA                                                                  |
| RARA                        |        | ligand-dependent nuclear receptor     |           | -2,109 | -2,914 | -0,224 | 2,89E-06 | 3,01E-05 | CDKN1A,CEBPB,CEBPD,EGR1,FOS,HMGR,JUN,JUNB,LDLR,LIFR,PER1,SERPINE1,SOCS2,VEGFA                                                         |
| MACROH2A1                   | -0,017 | other                                 |           | -0,108 | -0,102 | 0,002  | 3,05E-06 | 3,16E-05 | CCNA2,CDKN1A,CEBPB,DUSP1,EGR1,ELL2,FOS,FOSL2,GDF15,HNF1B,IL6R,JUN,LIFR,NEDD9,RGS3                                                     |
|                             |        |                                       |           | -0,775 | -0,378 | 0,150  | 3,53E-06 | 3,59E-05 | CDKN1A,CDKN1C,CITED2,EGR1,GADD45A,SERPINE1,SOCS2                                                                                      |

|                              |        |                                                           |           |        |        |        |          |          |                                                                                                                                                |
|------------------------------|--------|-----------------------------------------------------------|-----------|--------|--------|--------|----------|----------|------------------------------------------------------------------------------------------------------------------------------------------------|
| amino acids                  |        | chemical - endogenous mammalian                           | Activated | 1,786  | 2,164  | 0,174  | 4,03E-06 | 4,05E-05 | FOS,FOSB,JUN,JUNB,SLC38A2                                                                                                                      |
| APP                          | -0,110 | other                                                     | Inhibited | -1,312 | -2,178 | -0,203 | 4,18E-06 | 4,19E-05 | ARF6,CCN2,CITED2,EGR1,ETS2,FOS,FOSB,GDF15,HES1,HMGCR,HOMER1,IFIT2,JUN,JUNB,JUND,LDLR,MAFF,NAMPT,RCAN1,RNASEL,SERPINE1,SMAD7,TUBB2A,VEGFA,YWHAZ |
| ADCYAP1                      |        | other                                                     |           | -1,393 | -1,853 | -0,136 | 4,23E-06 | 4,24E-05 | BTG2,CCNA2,CEBPB,CEBPD,CHGB,EGR1,FOS,GCLM,IER3,MCM2,NFKBIA,RHOB                                                                                |
| RPS6KA4                      |        | kinase                                                    |           | -1,988 | -1,988 | 0,000  | 4,29E-06 | 4,28E-05 | DUSP1,FOS,JUN,JUNB                                                                                                                             |
| NME1                         | 0,110  | kinase                                                    |           | 1,479  | 1,904  | 0,224  | 4,44E-06 | 4,41E-05 | CCN2,CDKN1A,RAE1,SERPINE1,SLBP,SMAD7                                                                                                           |
| SOX2                         |        | transcription regulator                                   |           | 1,155  | 1,497  | 0,084  | 4,77E-06 | 4,72E-05 | AMOT,ATF3,BHLHE40,CCN2,CDKN1A,CITED2,DUSP1,DUSP5,ETS2,FOS,GADD45B,GATA6,JAG1,JUN,KLF6,SERPINE1,VEGFA                                           |
| quinolinic acid              |        | chemical - endogenous mammalian                           | Inhibited | -2,208 | -2,376 | -0,071 | 5,08E-06 | 4,97E-05 | EGR1,FOS,FOSB,JUN,JUNB,JUND                                                                                                                    |
| 10E,12Z-octadecadienoic acid |        | chemical - endogenous mammalian                           |           | -1,726 | -1,941 | -0,083 | 5,84E-06 | 5,63E-05 | ATF3,GDF15,LDLR,NAMPT,NR4A1,NR4A3,PPP1R15A                                                                                                     |
| POMC                         | 0,034  | other                                                     | Inhibited | -2,038 | -2,581 | -0,210 | 6,24E-06 | 5,92E-05 | DUSP1,FOS,FOSL2,JUN,JUNB,LDLR,NR4A1,NR4A3                                                                                                      |
| RXRA                         | -0,076 | ligand-dependent nuclear receptor transcription regulator |           | 0,174  | -0,147 | -0,116 | 8,60E-06 | 7,95E-05 | ARG2,CCNA2,CDKN1A,CEBPD,CYP27B1,FOS,HBEGF,HNF1B,IER3,KLF9,NEDD9,VEGFA,WEE1                                                                     |
| BCL6                         | 0,069  | transcription regulator                                   |           | 0,712  | 1,067  | 0,179  | 8,84E-06 | 8,13E-05 | CDKN1A,CISH,DUSP6,GABARAPL1,GADD45A,IL6R,JUNB,KLF6,LDLR,SERPINE1,SOCS2                                                                         |
| TERT                         | 0,041  | enzyme                                                    |           | 0,527  | 0,333  | -0,116 | 9,01E-06 | 8,24E-05 | ATF3,CCN2,CDKN1A,DUSP6,GATA6,GNA13,IFIT2,LIPG,NFKBIA                                                                                           |
| FOSL1                        | -0,100 | transcription regulator                                   | Activated | 2,390  | 2,390  | 0,000  | 9,27E-06 | 8,42E-05 | ADM,EGR1,FOS,FOSB,JUN,JUNB,SERPINE1                                                                                                            |
| TBX2                         | -0,100 | transcription regulator                                   |           | 1,699  | 1,238  | -0,178 | 1,01E-05 | 9,13E-05 | ATF3,BHLHE40,CCNA2,CCNL1,CDKN1A,MCM2,NFIL3                                                                                                     |
| leucine                      |        | chemical - endogenous mammalian                           |           | -0,109 | -0,200 | -0,042 | 1,04E-05 | 9,33E-05 | ATF3,CDKN1A,FOS,NR4A1,PPP1R15A                                                                                                                 |
| DCN                          | -0,258 | other                                                     |           | -0,726 | -0,589 | 0,059  | 1,34E-05 | 1,18E-04 | CCN2,CDKN1A,CDKN1C,DUSP1,SERPINE1,VEGFA                                                                                                        |
| PRKG1                        |        | kinase                                                    |           | -0,750 | -0,651 | 0,045  | 1,45E-05 | 1,26E-04 | CCN2,CDKN1A,FOS,GUCY1A1,SERPINE1                                                                                                               |
| SPI1                         |        | transcription regulator                                   |           | 2,536  | 1,947  | -0,227 | 1,47E-05 | 1,28E-04 | CCNA2,CDKN1A,CHI3L1,DUSP6,ETS2,FOS,FOXO1,HES1,IFIT2,IFIT3,JUN,MCL1                                                                             |
| HMGA1                        | -0,045 | transcription regulator                                   |           | 0,360  | -0,156 | -0,174 | 1,77E-05 | 1,50E-04 | EGR1,FOS,FOSL2,HMGCR,IDI1,IER2,IER3,JUNB,RHOB                                                                                                  |
| NDRG1                        | -0,029 | kinase                                                    |           | -0,249 | -0,249 | 0,000  | 1,97E-05 | 1,64E-04 | ATF3,EIF2AK3,FOS,JUN,VEGFA                                                                                                                     |
| DDIT3                        | -0,239 | transcription regulator                                   |           | -0,041 | -0,213 | -0,062 | 2,14E-05 | 1,77E-04 | ATF3,CEBPD,FOXO1,JAG1,PER1,PPP1R15A,SRSF2,TSC22D3                                                                                              |
| CTBP1                        | -0,151 | enzyme                                                    |           | 1,509  | 1,977  | 0,237  | 2,62E-05 | 2,07E-04 | ACKR3,CDKN1A,FKBP5,FOS,SPRY2                                                                                                                   |
| KDM1A                        |        | enzyme                                                    |           | 0,765  | 1,174  | 0,133  | 2,63E-05 | 2,08E-04 | ADM,CCNA2,CDKN1A,ELL2,FOXO1,MCM2,SERPINE1,SMAD7,SOCS2,ZNF165                                                                                   |
| ERBB3                        | 0,029  | kinase                                                    |           | 0,925  | 1,091  | 0,069  | 2,66E-05 | 2,10E-04 | CDKN1A,DUSP1,EGR1,F3,HBEGF,IER2,VEGFA                                                                                                          |
| corticosterone               |        | chemical - endogenous mammalian                           |           | -1,815 | -1,858 | -0,017 | 2,73E-05 | 2,15E-04 | CCN2,CDKN1A,FKBP5,FOS,JUN,KLF9,PKD4,SGK1                                                                                                       |
| PML                          |        | transcription regulator                                   |           | 0,246  | 0,131  | -0,039 | 2,96E-05 | 2,31E-04 | CDKN1A,GADD45A,GCLM,HMGCR,IFIT3,LDLR,MAFF,PKD4,UBE2M                                                                                           |
| TRH                          | 0,049  | other                                                     | Inhibited | -1,749 | -2,169 | -0,194 | 3,01E-05 | 2,33E-04 | DUSP1,FOS,JUN,JUNB,NR4A1                                                                                                                       |
| XDH                          | 0,089  | enzyme                                                    |           | 0,134  | 0,277  | 0,065  | 3,01E-05 | 2,33E-04 | CCN2,CEBPB,DUSP1,F3,SERPINE1                                                                                                                   |
| PIAS1                        |        | transcription regulator                                   |           | 0,634  | 0,762  | 0,065  | 3,01E-05 | 2,33E-04 | CDKN1A,GADD45A,KLF5,MCL1,RRAD                                                                                                                  |
| Pde4                         |        | group                                                     | Activated | 1,572  | 2,000  | 0,214  | 3,18E-05 | 2,44E-04 | CDKN1A,CYP51A1,HMGCR,LDLR                                                                                                                      |



|                 |        |                                   |           |        |        |          |          |                                                                                     |                                                 |
|-----------------|--------|-----------------------------------|-----------|--------|--------|----------|----------|-------------------------------------------------------------------------------------|-------------------------------------------------|
| mevalonic acid  |        | chemical - endogenous mammalian   | 0,942     | 0,812  | -0,061 | 3,43E-05 | 2,58E-04 | CD55,HMGCR,LDLR,SERPINE1,VEGFA                                                      |                                                 |
| FGF1            | -0,567 | growth factor                     | -2,132    | -1,853 | 0,110  | 3,45E-05 | 2,59E-04 | CCN2,CDKN1A,DUSP6,EGR1,FOS,GCLM,JUN,VEGFA                                           |                                                 |
| HDAC4           |        | transcription regulator           | -0,225    | 0,192  | 0,210  | 3,65E-05 | 2,73E-04 | ATF3,CDKN1A,FOS,GADD45A,HOMER1,NR4A1,RGS2,VEGFA                                     |                                                 |
| NR2F1           | 0,082  | ligand-dependent nuclear receptor | -0,620    | -0,811 | -0,097 | 3,91E-05 | 2,89E-04 | EGR1,GDF15,HNF1B,JAG1,SPRY2                                                         |                                                 |
| LY6E            | 0,188  | other                             | -0,116    | 0,000  | 0,058  | 3,94E-05 | 2,89E-04 | CCN2,CD83,NFKBIA,SERPINE1                                                           |                                                 |
| AGTR1           | -0,044 | G-protein coupled receptor        | -0,974    | -1,400 | -0,194 | 4,43E-05 | 3,19E-04 | DUSP1,FOS,JUN,SERPINE1,SGK1                                                         |                                                 |
| ATF3            | -1,461 | transcription regulator           | -0,541    | -0,248 | 0,122  | 4,67E-05 | 3,36E-04 | ATF3,CD83,CDKN1A,JUN,LDLR,PPP1R15A,SERPINE1                                         |                                                 |
| ADIPOQ          | 0,054  | other                             | 1,262     | 1,141  | -0,044 | 4,78E-05 | 3,42E-04 | CCN2,CDKN1A,DUSP1,EGR1,F3,FOS,HBEGF,LDLR,NFKBIA                                     |                                                 |
| IGFBP5          | 0,066  | other                             | -1,812    | -1,976 | -0,083 | 4,83E-05 | 3,42E-04 | BHLHE40,F3,SERPINE1,TNFRSF1A                                                        |                                                 |
| RPS6KA5         |        | kinase                            | -1,528    | -1,990 | -0,233 | 4,83E-05 | 3,42E-04 | DUSP1,FOS,JUN,JUNB                                                                  |                                                 |
| Pkg             |        | group                             | Inhibited | -1,502 | -2,000 | -0,249   | 5,86E-05 | 4,04E-04                                                                            | EGR1,FOS,FOSB,JUN                               |
| MAPK13          | 0,073  | kinase                            | -0,807    | -1,114 | -0,159 | 5,86E-05 | 4,04E-04 | CDKN1A,CITED2,FOS,VEGFA                                                             |                                                 |
| DYRK1A          |        | kinase                            | -1,498    | -1,000 | 0,249  | 5,86E-05 | 4,04E-04 | CDKN1A,RCAN1,SERPINE1,SRSF2                                                         |                                                 |
| TNFSF10         | 0,253  | cytokine                          | Activated | 2,233  | 2,023  | -0,090   | 6,07E-05 | 4,18E-04                                                                            | FOS,JUN,MCL1,NFKBIA,RCAN1,TFRC,VEGFA            |
| THR3            | 0,005  | ligand-dependent nuclear receptor | -0,594    | -0,816 | -0,091 | 6,22E-05 | 4,25E-04 | BTG2,CYP27B1,FOS,JUN,KLF9,LDLR,NR4A1,PKD4,PER1,SERPINE1                             |                                                 |
| ADORA2A         |        | G-protein coupled receptor        | -0,191    | -0,426 | -0,088 | 6,29E-05 | 4,28E-04 | DUSP1,FOS,NFKBIA,NR4A1,NR4A3,TSC22D3,TUBB2A,VEGFA                                   |                                                 |
| S100A8          | -0,493 | other                             | -0,381    | -0,788 | -0,144 | 7,15E-05 | 4,81E-04 | ARG2,ATF3,BHLHE40,EFNA1,NFKBIA,NR4A3,PER1,RAB20,SGK1                                |                                                 |
| GLI3            | 0,051  | transcription regulator           | Inhibited | -2,125 | -2,449 | -0,133   | 7,22E-05 | 4,84E-04                                                                            | DUSP1,DUSP5,EGR1,FOSB,FOXO1,JUNB                |
| KLF6            | -1,235 | transcription regulator           | 0,642     | 0,486  | -0,073 | 7,81E-05 | 5,14E-04 | ATF3,CDKN1A,MCL1,NFKBIA,NR4A1,VEGFA                                                 |                                                 |
| K+              |        | chemical - endogenous mammalian   | 0,125     | -0,420 | -0,249 | 7,90E-05 | 5,18E-04 | ATF3,EGR1,FOS,JUN,NR4A1                                                             |                                                 |
| OGA             | 0,193  | enzyme                            | 1,296     | 1,499  | 0,055  | 8,09E-05 | 5,29E-04 | ADRM1,CAVIN2,CD55,CDKN1A,CEBPB,EPHA4,FERMT2,GADD45A,HMGCR,IFIT3,IL6R,JUN,RHOB,SOCS2 |                                                 |
| VDR             | -0,079 | transcription regulator           | 0,368     | 0,671  | 0,126  | 8,11E-05 | 5,29E-04 | CDKN1A,CEBPB,CYP27B1,F3,GADD45A,IER3,JUN,LDLR                                       |                                                 |
| SP110           | 0,179  | transcription regulator           | Activated | 1,783  | 2,121  | 0,120    | 8,11E-05 | 5,29E-04                                                                            | ATF3,F3,GNA13,IFIT3,IL6R,MCL1,NFIL3,TNFRSF1A    |
| AGER            |        | transmembrane receptor            | Inhibited | -1,735 | -2,187 | -0,207   | 8,44E-05 | 5,45E-04                                                                            | CDKN1A,CHGB,EGR1,F3,SERPINE1,VEGFA              |
| SPHK1           | 0,035  | kinase                            | -0,751    | -1,159 | -0,185 | 8,80E-05 | 5,65E-04 | CCN2,CDKN1A,EGR1,JUN,SERPINE1                                                       |                                                 |
| ACOX1           | -0,057 | enzyme                            | Activated | 2,500  | 2,813  | 0,111    | 9,40E-05 | 5,99E-04                                                                            | CDKN1A,ETS2,GADD45A,KLF6,PKD4,RGS2,SGK1,SLC20A1 |
| thyroid hormone |        | chemical - endogenous mammalian   | -1,221    | -1,195 | 0,010  | 9,61E-05 | 6,06E-04 | BTG2,CCNA2,CDKN1A,CHGB,EGR1,FOS,HMGCR,KLF9,PER1                                     |                                                 |
| PTPN11          |        | phosphatase                       | -0,096    | -0,232 | -0,069 | 9,82E-05 | 6,12E-04 | CDKN1A,EGR1,FOS,JUN,MCL1,PIM1                                                       |                                                 |
| BCL2            |        | transporter                       | 1,499     | 0,946  | -0,217 | 9,90E-05 | 6,15E-04 | CDKN1A,CHGB,FOS,GADD45A,MCL1,NFKBIA,VEGFA                                           |                                                 |
| WWTR1           | -0,100 | transcription regulator           | -0,877    | -1,387 | -0,230 | 1,08E-04 | 6,64E-04 | CCN2,CCNA2,CDKN1A,SERPINE1,SMAD7                                                    |                                                 |
| PRKAA1          | -0,053 | kinase                            | -0,980    | -0,378 | 0,228  | 1,09E-04 | 6,66E-04 | ACKR3,ATF3,CDKN1A,CHGB,FKBP5,NFKBIA,RGS2,RND3                                       |                                                 |
| YY1             |        | transcription regulator           | 1,315     | 1,423  | 0,045  | 1,12E-04 | 6,88E-04 | BTG2,CCNA2,CDKN1A,CEBPB,EGR1,FOS,HMGCR,LDLR,PPP1R15A,RND3,VEGFA                     |                                                 |

|        |        |                         |        |        |        |          |          |                                                          |
|--------|--------|-------------------------|--------|--------|--------|----------|----------|----------------------------------------------------------|
| NOS2   | -0,049 | enzyme                  | -0,048 | -0,251 | -0,068 | 1,13E-04 | 6,91E-04 | CDKN1A,CHI3L1,DDX3X,FOXO1,IFIT3,KLF6,NFKBIA,TSPYL2,VEGFA |
| LTBP1  | 0,107  | other                   | 0,378  | 0,000  | -0,194 | 1,16E-04 | 7,03E-04 | MCL1,PIM1,SERPINE1,SMAD7                                 |
| DTX1   |        | transcription regulator | 0,113  | -0,152 | -0,134 | 1,16E-04 | 7,03E-04 | DUSP6,EGR1,MCL1,VEGFA                                    |
| MAP3K8 | -0,061 | kinase                  | -1,095 | -1,311 | -0,084 | 1,31E-04 | 7,84E-04 | CEBPD,DUSP6,FOS,IER3,JUN,JUNB,RGS3,SLCO4A1               |
| BTK    | 0,052  | kinase                  | -1,768 | -1,969 | -0,077 | 1,55E-04 | 9,09E-04 | CDKN1A,CEBPB,CISH,FOXO1,IFIT3,JUN,PIM1                   |
| ZBTB20 | -0,099 | transcription regulator | 2,249  | 2,200  | -0,022 | 1,59E-04 | 9,28E-04 | CISH,NEDD9,NFKBIA,PKD4,SOCS2                             |

Table S3. Gold

| Upstream Regulator | Expr Log Ratio | Molecule Type                   | Predicted Activation State | Bias-corrected z-score | Activation z-score | Bias Term | p-value of overlap | B-H corrected p-value | Target Molecules in Dataset                                                                                                                                                                                                                                                                                                                                                                                                                                                                                                                                                                                                                                                                                                                                                                                                                                                                                                                                                                                                                                                                                                                                                                                                                                                                                                                                                                                                                                                                                                                                                                                                                                                                                                                                                                                                                                                                                                                                                                                                                                                                                                                                                                                                                                                                                                                                                                                                                                                                                                                                                                                                                                                                                                                                                                                                                                                                                                                                                                                                                                                                                                                                                                                                                                                                                                                                                                                                                                                                                                                                                                                                                                                                                                                                                                                                                                                                                                                                                                                                                                                                                                                                                                                                                                                                                                                                                                                                                                                                                                                                                                                                                                                                                                                                                                                                                                                                                                                                                                                                                                                                                                                                                                                                                                                                                                                                                                                                                                                                                                                                                                                                                                                                                                                                                                                                                                                                                                                                                                                                                                                                                                                                                                                                                                                                                                                                                                                                                                                                                                                                                                                                                                                                                                                                                                                                                                                                                                                                                                                                                                                                                                                                                                                                                                                                                                                                                                                                                                                                                                                                                                                                                                                                                                                                                                                                                                                                                                                                                                                                                                                                                                                                                                                                                                                                                                                                                                                                                                                                                                                                                                                                                                                                                                                                                                                                                                                                                                                                                                                                                                                                                                                                                                                                                                                                                                                                                                                                                                                                                                                                                                                                                                                                                                                                                                                                                                                                                                                                                                                                                                                                                                                                                                                                                                                                                                                                                                                                                                                                                                                                           |
|--------------------|----------------|---------------------------------|----------------------------|------------------------|--------------------|-----------|--------------------|-----------------------|-----------------------------------------------------------------------------------------------------------------------------------------------------------------------------------------------------------------------------------------------------------------------------------------------------------------------------------------------------------------------------------------------------------------------------------------------------------------------------------------------------------------------------------------------------------------------------------------------------------------------------------------------------------------------------------------------------------------------------------------------------------------------------------------------------------------------------------------------------------------------------------------------------------------------------------------------------------------------------------------------------------------------------------------------------------------------------------------------------------------------------------------------------------------------------------------------------------------------------------------------------------------------------------------------------------------------------------------------------------------------------------------------------------------------------------------------------------------------------------------------------------------------------------------------------------------------------------------------------------------------------------------------------------------------------------------------------------------------------------------------------------------------------------------------------------------------------------------------------------------------------------------------------------------------------------------------------------------------------------------------------------------------------------------------------------------------------------------------------------------------------------------------------------------------------------------------------------------------------------------------------------------------------------------------------------------------------------------------------------------------------------------------------------------------------------------------------------------------------------------------------------------------------------------------------------------------------------------------------------------------------------------------------------------------------------------------------------------------------------------------------------------------------------------------------------------------------------------------------------------------------------------------------------------------------------------------------------------------------------------------------------------------------------------------------------------------------------------------------------------------------------------------------------------------------------------------------------------------------------------------------------------------------------------------------------------------------------------------------------------------------------------------------------------------------------------------------------------------------------------------------------------------------------------------------------------------------------------------------------------------------------------------------------------------------------------------------------------------------------------------------------------------------------------------------------------------------------------------------------------------------------------------------------------------------------------------------------------------------------------------------------------------------------------------------------------------------------------------------------------------------------------------------------------------------------------------------------------------------------------------------------------------------------------------------------------------------------------------------------------------------------------------------------------------------------------------------------------------------------------------------------------------------------------------------------------------------------------------------------------------------------------------------------------------------------------------------------------------------------------------------------------------------------------------------------------------------------------------------------------------------------------------------------------------------------------------------------------------------------------------------------------------------------------------------------------------------------------------------------------------------------------------------------------------------------------------------------------------------------------------------------------------------------------------------------------------------------------------------------------------------------------------------------------------------------------------------------------------------------------------------------------------------------------------------------------------------------------------------------------------------------------------------------------------------------------------------------------------------------------------------------------------------------------------------------------------------------------------------------------------------------------------------------------------------------------------------------------------------------------------------------------------------------------------------------------------------------------------------------------------------------------------------------------------------------------------------------------------------------------------------------------------------------------------------------------------------------------------------------------------------------------------------------------------------------------------------------------------------------------------------------------------------------------------------------------------------------------------------------------------------------------------------------------------------------------------------------------------------------------------------------------------------------------------------------------------------------------------------------------------------------------------------------------------------------------------------------------------------------------------------------------------------------------------------------------------------------------------------------------------------------------------------------------------------------------------------------------------------------------------------------------------------------------------------------------------------------------------------------------------------------------------------------------------------------------------------------------------------------------------------------------------------------------------------------------------------------------------------------------------------------------------------------------------------------------------------------------------------------------------------------------------------------------------------------------------------------------------------------------------------------------------------------------------------------------------------------------------------------------------------------------------------------------------------------------------------------------------------------------------------------------------------------------------------------------------------------------------------------------------------------------------------------------------------------------------------------------------------------------------------------------------------------------------------------------------------------------------------------------------------------------------------------------------------------------------------------------------------------------------------------------------------------------------------------------------------------------------------------------------------------------------------------------------------------------------------------------------------------------------------------------------------------------------------------------------------------------------------------------------------------------------------------------------------------------------------------------------------------------------------------------------------------------------------------------------------------------------------------------------------------------------------------------------------------------------------------------------------------------------------------------------------------------------------------------------------------------------------------------------------------------------------------------------------------------------------------------------------------------------------------------------------------------------------------------------------------------------------------------------------------------------------------------------------------------------------------------------------------------------------------------------------------------------------------------------------------------------------------------------------------------------------------------------------------------------------------------------------------------------------------------------------------------------------------------------------------------------------------------------------------------------------------------------------------------------------------------------------------------------------------------------------------------------------------------------------------------------------------------------------------------------------------------------------------------------|
| beta-estradiol     |                | chemical - endogenous mammalian |                            | -0,606                 | -0,534             | 0,003     | 2,92E-69           | 8,24E-66              | A2M,ABCC5,ABCG2,ACAA1,ACAA2,ACADM,ACADVL,ACE,ACKR3,ACOX1,ACOX2,ACP5,ACSL1,ACSM3,ACTB,ADAMDEC1,ADAMTS1,ADCY9,ADIRF,ADM,ADRB2,AEBP1,AFP,AGRN,AHR,ALB,ALDH18A1,ALDH4A1,ALDH7A1,ALPG,ANKH,ANXA1,ANXA3,ANXA4,APBB1,APOA1,APOA4,APOE,AQP1,ARAF,ARC,ARNT2,ASB9,ATF3,AURKA,AVP,BAG1,BAX,BAZ1A,BCAS3,BCL2A1,BCL6,BHLHE40,BID,BIN1,IRC3,BLNK,BNIP2,BNIP3L,C3,CA2,CALB1,CALM1 (includes others),CALR,CAMK2A,CAP2,CASP3,CASP4,CAST,CAV1,CAV2,CB X6,CCL20,CCL21,CCL5,CCNA2,CCNB1,CCNB2,CCND1,CCND2,CCND3,CCNG1,CCR2,CCR5,CCT2,CD14,CD24,CD40,CD44,CD55,CD69,CD74,CD86,CDC123,CDH11,CDH15,CDK1,CDK18,CDK5,CDKN1B,CDKN1C,CELF2,CENPM,CFB,CGA,CHUK,CKM,CLCN3,CLDN1,CLIC4,CLU,CNN2,COA4,COL1A1,COL1A2,COL3A1,COLEC12,COMT,COX6A2,CRADD,CRYZ,CSE1L,CSHL1,CSTB,CTPS1,CTSB,CTSD,CTSK,CUBN,CXADR,CXCL1,CXCL10,CXCL11,CXCL12,CXCR4,CYB5A,CYBB,CYP17A1,CYP1B1,CYP2A6 (includes others),CYP2B6,CYP3A4,DAB2,DBN1,DCLK1,DCN,DDDB2,DDC,DDIT3,DDOST,DDR1,DECR1,DEFB1,DERL1,DHCR7,DHRS9,DIO1,DLG3,DMTN,DNPH1,DUSP1,DUSP3,DYNLL1,DYRK2,ECH1,ECHDC2,EFNB2,EGF,EIF3D,ELF1,ENC1,ENO1,ENPP2,EPB41L3,ERBB3,ERF,ERH,ESR1,ESRRA,EXT2,F12,F2RL1,F3,FAAH,FAM111A,FARP1,FAS,FBN1,FCGR2B,FCGRT,FEZ2,FGF1,FGF7,FGFR3,FHL1,FHL2,FMO1,FMO5,FN1,FNBP1,FOLH1,FOLR1,FOS,FOSB,FOSL1,FOXO1,FSCN1,FSTL1,FXYD5,FZD2,G6PC,GAB2,GADD45A,GADD45B,GADD45G,GALNT1,GALNT7,GARS1,GBP2,GCH1,GCHFR,GCLC,GHR,GIPC2,GJA1,GJB1,GK,GLRB,GM2A,GMFB,GNA11,GNB1,GNL3,GPER1,GPR137B,GPSM2,GPX3,GRB10,GSR,GSTA1,GSTP1,GTF2IRD1,GUCY1A1,GUCY1B1,GYPA,HADH,HBB,HDAC1,HIF1A,HLA-A,HLA-DQA1,HLA-DRB1,HLA-E,HNF1B,HOXA10,HPGD,HSD11B2,HSD17B11,HSP90B1,HSPA5,HSPA8,HSPA9,HSPB8,HTR6,HTRA1,ICAM1,IDO1,IDO2,IDO3,IFNGR2,IFRD1,IFRD2,IFT122,IGFBP4,IGFBP6,IGSF6,IL13,IL15,IL18,IL1R1,IL4R,IL6R,IL7,IL7R,IMPDH2,INHA,INPP4B,INPP5J,IQGAP1,IRF1,IRF7,ISG15,ITGA2,ITGAV,ITGB2,ITGB3,JAK1,JUND,KCEN2,KDEL3,KITLG,KLF9,KLK1,KRAS,KRT19,KRT4,KRT7,KRT81,KYNU,LAMB1,LAPTM5,LCN2,LEPR,LEPROT,LGALS3BP,LHB,LHFPL2,LIMA1,LIN7A,LITAF,LPIN1,LPO,LTB,LTF,LUM,LYZ,LZTS3,MAD2L1,MAF,MAL,MAOA,MAP2K3,MAPT,MCAM,MCM2,MCM3,MCM5,MCM6,MCM7,MEIS2,MET,MGP,MMD,MME,MMP1,MMP2,MMP7,MMP9,MPC1,MPDZ,MRC1,MSMO1,MT1F,MT1G,MT1X,MTOR,MTTP,MUC1,MX1,MYB,MYL12A,MYO1B,MYOF,NAMPT,NCF2,NDRG1,NEDD4L,NEDD9,NET1,NFE2L2,NFKB1,NIPSNAP1,NME1,NOS2,NPPA,NPR3,NPY1R,NR0B2,NR1H3,NR4A1,NR4A3,NRP1,NSDHL,NUCB2,NUDT1,OGDH,OSTF1,OXP4HB,PARP1,PCBD1,PCNA,PCYOX1,PDCCD4,PDGFRA,PDIA3,PDIA4,PDIA5,PDIA6,PDIA7,PDIA8,PDIA9,PDIA10,PDIA11,PDIA12,PDIA13,PDIA14,PDIA15,PDIA16,PDIA17,PDIA18,PDIA19,PDIA20,PDIA21,PDIA22,PDIA23,PDIA24,PDIA25,PDIA26,PDIA27,PDIA28,PDIA29,PDIA30,PDIA31,PDIA32,PDIA33,PDIA34,PDIA35,PDIA36,PDIA37,PDIA38,PDIA39,PDIA40,PDIA41,PDIA42,PDIA43,PDIA44,PDIA45,PDIA46,PDIA47,PDIA48,PDIA49,PDIA50,PDIA51,PDIA52,PDIA53,PDIA54,PDIA55,PDIA56,PDIA57,PDIA58,PDIA59,PDIA60,PDIA61,PDIA62,PDIA63,PDIA64,PDIA65,PDIA66,PDIA67,PDIA68,PDIA69,PDIA70,PDIA71,PDIA72,PDIA73,PDIA74,PDIA75,PDIA76,PDIA77,PDIA78,PDIA79,PDIA80,PDIA81,PDIA82,PDIA83,PDIA84,PDIA85,PDIA86,PDIA87,PDIA88,PDIA89,PDIA90,PDIA91,PDIA92,PDIA93,PDIA94,PDIA95,PDIA96,PDIA97,PDIA98,PDIA99,PDIA100,PDIA101,PDIA102,PDIA103,PDIA104,PDIA105,PDIA106,PDIA107,PDIA108,PDIA109,PDIA110,PDIA111,PDIA112,PDIA113,PDIA114,PDIA115,PDIA116,PDIA117,PDIA118,PDIA119,PDIA120,PDIA121,PDIA122,PDIA123,PDIA124,PDIA125,PDIA126,PDIA127,PDIA128,PDIA129,PDIA130,PDIA131,PDIA132,PDIA133,PDIA134,PDIA135,PDIA136,PDIA137,PDIA138,PDIA139,PDIA140,PDIA141,PDIA142,PDIA143,PDIA144,PDIA145,PDIA146,PDIA147,PDIA148,PDIA149,PDIA150,PDIA151,PDIA152,PDIA153,PDIA154,PDIA155,PDIA156,PDIA157,PDIA158,PDIA159,PDIA160,PDIA161,PDIA162,PDIA163,PDIA164,PDIA165,PDIA166,PDIA167,PDIA168,PDIA169,PDIA170,PDIA171,PDIA172,PDIA173,PDIA174,PDIA175,PDIA176,PDIA177,PDIA178,PDIA179,PDIA180,PDIA181,PDIA182,PDIA183,PDIA184,PDIA185,PDIA186,PDIA187,PDIA188,PDIA189,PDIA190,PDIA191,PDIA192,PDIA193,PDIA194,PDIA195,PDIA196,PDIA197,PDIA198,PDIA199,PDIA200,PDIA201,PDIA202,PDIA203,PDIA204,PDIA205,PDIA206,PDIA207,PDIA208,PDIA209,PDIA210,PDIA211,PDIA212,PDIA213,PDIA214,PDIA215,PDIA216,PDIA217,PDIA218,PDIA219,PDIA220,PDIA221,PDIA222,PDIA223,PDIA224,PDIA225,PDIA226,PDIA227,PDIA228,PDIA229,PDIA230,PDIA231,PDIA232,PDIA233,PDIA234,PDIA235,PDIA236,PDIA237,PDIA238,PDIA239,PDIA240,PDIA241,PDIA242,PDIA243,PDIA244,PDIA245,PDIA246,PDIA247,PDIA248,PDIA249,PDIA250,PDIA251,PDIA252,PDIA253,PDIA254,PDIA255,PDIA256,PDIA257,PDIA258,PDIA259,PDIA260,PDIA261,PDIA262,PDIA263,PDIA264,PDIA265,PDIA266,PDIA267,PDIA268,PDIA269,PDIA270,PDIA271,PDIA272,PDIA273,PDIA274,PDIA275,PDIA276,PDIA277,PDIA278,PDIA279,PDIA280,PDIA281,PDIA282,PDIA283,PDIA284,PDIA285,PDIA286,PDIA287,PDIA288,PDIA289,PDIA290,PDIA291,PDIA292,PDIA293,PDIA294,PDIA295,PDIA296,PDIA297,PDIA298,PDIA299,PDIA300,PDIA301,PDIA302,PDIA303,PDIA304,PDIA305,PDIA306,PDIA307,PDIA308,PDIA309,PDIA310,PDIA311,PDIA312,PDIA313,PDIA314,PDIA315,PDIA316,PDIA317,PDIA318,PDIA319,PDIA320,PDIA321,PDIA322,PDIA323,PDIA324,PDIA325,PDIA326,PDIA327,PDIA328,PDIA329,PDIA330,PDIA331,PDIA332,PDIA333,PDIA334,PDIA335,PDIA336,PDIA337,PDIA338,PDIA339,PDIA340,PDIA341,PDIA342,PDIA343,PDIA344,PDIA345,PDIA346,PDIA347,PDIA348,PDIA349,PDIA350,PDIA351,PDIA352,PDIA353,PDIA354,PDIA355,PDIA356,PDIA357,PDIA358,PDIA359,PDIA360,PDIA361,PDIA362,PDIA363,PDIA364,PDIA365,PDIA366,PDIA367,PDIA368,PDIA369,PDIA370,PDIA371,PDIA372,PDIA373,PDIA374,PDIA375,PDIA376,PDIA377,PDIA378,PDIA379,PDIA380,PDIA381,PDIA382,PDIA383,PDIA384,PDIA385,PDIA386,PDIA387,PDIA388,PDIA389,PDIA390,PDIA391,PDIA392,PDIA393,PDIA394,PDIA395,PDIA396,PDIA397,PDIA398,PDIA399,PDIA400,PDIA401,PDIA402,PDIA403,PDIA404,PDIA405,PDIA406,PDIA407,PDIA408,PDIA409,PDIA410,PDIA411,PDIA412,PDIA413,PDIA414,PDIA415,PDIA416,PDIA417,PDIA418,PDIA419,PDIA420,PDIA421,PDIA422,PDIA423,PDIA424,PDIA425,PDIA426,PDIA427,PDIA428,PDIA429,PDIA430,PDIA431,PDIA432,PDIA433,PDIA434,PDIA435,PDIA436,PDIA437,PDIA438,PDIA439,PDIA440,PDIA441,PDIA442,PDIA443,PDIA444,PDIA445,PDIA446,PDIA447,PDIA448,PDIA449,PDIA450,PDIA451,PDIA452,PDIA453,PDIA454,PDIA455,PDIA456,PDIA457,PDIA458,PDIA459,PDIA460,PDIA461,PDIA462,PDIA463,PDIA464,PDIA465,PDIA466,PDIA467,PDIA468,PDIA469,PDIA470,PDIA471,PDIA472,PDIA473,PDIA474,PDIA475,PDIA476,PDIA477,PDIA478,PDIA479,PDIA480,PDIA481,PDIA482,PDIA483,PDIA484,PDIA485,PDIA486,PDIA487,PDIA488,PDIA489,PDIA490,PDIA491,PDIA492,PDIA493,PDIA494,PDIA495,PDIA496,PDIA497,PDIA498,PDIA499,PDIA500,PDIA501,PDIA502,PDIA503,PDIA504,PDIA505,PDIA506,PDIA507,PDIA508,PDIA509,PDIA510,PDIA511,PDIA512,PDIA513,PDIA514,PDIA515,PDIA516,PDIA517,PDIA518,PDIA519,PDIA520,PDIA521,PDIA522,PDIA523,PDIA524,PDIA525,PDIA526,PDIA527,PDIA528,PDIA529,PDIA530,PDIA531,PDIA532,PDIA533,PDIA534,PDIA535,PDIA536,PDIA537,PDIA538,PDIA539,PDIA540,PDIA541,PDIA542,PDIA543,PDIA544,PDIA545,PDIA546,PDIA547,PDIA548,PDIA549,PDIA550,PDIA551,PDIA552,PDIA553,PDIA554,PDIA555,PDIA556,PDIA557,PDIA558,PDIA559,PDIA560,PDIA561,PDIA562,PDIA563,PDIA564,PDIA565,PDIA566,PDIA567,PDIA568,PDIA569,PDIA570,PDIA571,PDIA572,PDIA573,PDIA574,PDIA575,PDIA576,PDIA577,PDIA578,PDIA579,PDIA580,PDIA581,PDIA582,PDIA583,PDIA584,PDIA585,PDIA586,PDIA587,PDIA588,PDIA589,PDIA590,PDIA591,PDIA592,PDIA593,PDIA594,PDIA595,PDIA596,PDIA597,PDIA598,PDIA599,PDIA600,PDIA601,PDIA602,PDIA603,PDIA604,PDIA605,PDIA606,PDIA607,PDIA608,PDIA609,PDIA610,PDIA611,PDIA612,PDIA613,PDIA614,PDIA615,PDIA616,PDIA617,PDIA618,PDIA619,PDIA620,PDIA621,PDIA622,PDIA623,PDIA624,PDIA625,PDIA626,PDIA627,PDIA628,PDIA629,PDIA630,PDIA631,PDIA632,PDIA633,PDIA634,PDIA635,PDIA636,PDIA637,PDIA638,PDIA639,PDIA640,PDIA641,PDIA642,PDIA643,PDIA644,PDIA645,PDIA646,PDIA647,PDIA648,PDIA649,PDIA650,PDIA651,PDIA652,PDIA653,PDIA654,PDIA655,PDIA656,PDIA657,PDIA658,PDIA659,PDIA660,PDIA661,PDIA662,PDIA663,PDIA664,PDIA665,PDIA666,PDIA667,PDIA668,PDIA669,PDIA670,PDIA671,PDIA672,PDIA673,PDIA674,PDIA675,PDIA676,PDIA677,PDIA678,PDIA679,PDIA680,PDIA681,PDIA682,PDIA683,PDIA684,PDIA685,PDIA686,PDIA687,PDIA688,PDIA689,PDIA690,PDIA691,PDIA692,PDIA693,PDIA694,PDIA695,PDIA696,PDIA697,PDIA698,PDIA699,PDIA700,PDIA701,PDIA702,PDIA703,PDIA704,PDIA705,PDIA706,PDIA707,PDIA708,PDIA709,PDIA710,PDIA711,PDIA712,PDIA713,PDIA714,PDIA715,PDIA716,PDIA717,PDIA718,PDIA719,PDIA720,PDIA721,PDIA722,PDIA723,PDIA724,PDIA725,PDIA726,PDIA727,PDIA728,PDIA729,PDIA730,PDIA731,PDIA732,PDIA733,PDIA734,PDIA735,PDIA736,PDIA737,PDIA738,PDIA739,PDIA740,PDIA741,PDIA742,PDIA743,PDIA744,PDIA745,PDIA746,PDIA747,PDIA748,PDIA749,PDIA750,PDIA751,PDIA752,PDIA753,PDIA754,PDIA755,PDIA756,PDIA757,PDIA758,PDIA759,PDIA760,PDIA761,PDIA762,PDIA763,PDIA764,PDIA765,PDIA766,PDIA767,PDIA768,PDIA769,PDIA770,PDIA771,PDIA772,PDIA773,PDIA774,PDIA775,PDIA776,PDIA777,PDIA778,PDIA779,PDIA780,PDIA781,PDIA782,PDIA783,PDIA784,PDIA785,PDIA786,PDIA787,PDIA788,PDIA789,PDIA790,PDIA791,PDIA792,PDIA793,PDIA794,PDIA795,PDIA796,PDIA797,PDIA798,PDIA799,PDIA800,PDIA801,PDIA802,PDIA803,PDIA804,PDIA805,PDIA806,PDIA807,PDIA808,PDIA809,PDIA810,PDIA811,PDIA812,PDIA813,PDIA814,PDIA815,PDIA816,PDIA817,PDIA818,PDIA819,PDIA820,PDIA821,PDIA822,PDIA823,PDIA824,PDIA825,PDIA826,PDIA827,PDIA828,PDIA829,PDIA830,PDIA831,PDIA832,PDIA833,PDIA834,PDIA835,PDIA836,PDIA837,PDIA838,PDIA839,PDIA840,PDIA841,PDIA842,PDIA843,PDIA844,PDIA845,PDIA846,PDIA847,PDIA848,PDIA849,PDIA850,PDIA851,PDIA852,PDIA853,PDIA854,PDIA855,PDIA856,PDIA857,PDIA858,PDIA859,PDIA860,PDIA861,PDIA862,PDIA863,PDIA864,PDIA865,PDIA866,PDIA867,PDIA868,PDIA869,PDIA870,PDIA871,PDIA872,PDIA873,PDIA874,PDIA875,PDIA876,PDIA877,PDIA878,PDIA879,PDIA880,PDIA881,PDIA882,PDIA883,PDIA884,PDIA885,PDIA886,PDIA887,PDIA888,PDIA889,PDIA890,PDIA891,PDIA892,PDIA893,PDIA894,PDIA895,PDIA896,PDIA897,PDIA898,PDIA899,PDIA900,PDIA901,PDIA902,PDIA903,PDIA904,PDIA905,PDIA906,PDIA907,PDIA908,PDIA909,PDIA910,PDIA911,PDIA912,PDIA913,PDIA914,PDIA915,PDIA916,PDIA917,PDIA918,PDIA919,PDIA920,PDIA921,PDIA922,PDIA923,PDIA924,PDIA925,PDIA926,PDIA927,PDIA928,PDIA929,PDIA930,PDIA931,PDIA932,PDIA933,PDIA934,PDIA935,PDIA936,PDIA937,PDIA938,PDIA939,PDIA940,PDIA941,PDIA942,PDIA943,PDIA944,PDIA945,PDIA946,PDIA947,PDIA948,PDIA949,PDIA950,PDIA951,PDIA952,PDIA953,PDIA954,PDIA955,PDIA956,PDIA957,PDIA958,PDIA959,PDIA960,PDIA961,PDIA962,PDIA963,PDIA964,PDIA965,PDIA966,PDIA967,PDIA968,PDIA969,PDIA970,PDIA971,PDIA972,PDIA973,PDIA974,PDIA975,PDIA976,PDIA977,PDIA978,PDIA979,PDIA980,PDIA981,PDIA982,PDIA983,PDIA984,PDIA985,PDIA986,PDIA987,PDIA988,PDIA989,PDIA990,PDIA991,PDIA992,PDIA993,PDIA994,PDIA995,PDIA996,PDIA997,PDIA998,PDIA999,PDIA1000 |

|       |               |           |       |       |       |          |          |                                                                                                                                                                                                                                                                                                                                                                                                                                                                                                                                                                                                                                                                                                                                                                                                                                                                                                                                                                                                                                                                                                                                                                                                                                                                                                                                                                                                                                                                                                                                                                                                                                                                                                                                                                                                                                                                                                                                                                                                                                                                                                                                                                                                                                                                                                                                                                                           |
|-------|---------------|-----------|-------|-------|-------|----------|----------|-------------------------------------------------------------------------------------------------------------------------------------------------------------------------------------------------------------------------------------------------------------------------------------------------------------------------------------------------------------------------------------------------------------------------------------------------------------------------------------------------------------------------------------------------------------------------------------------------------------------------------------------------------------------------------------------------------------------------------------------------------------------------------------------------------------------------------------------------------------------------------------------------------------------------------------------------------------------------------------------------------------------------------------------------------------------------------------------------------------------------------------------------------------------------------------------------------------------------------------------------------------------------------------------------------------------------------------------------------------------------------------------------------------------------------------------------------------------------------------------------------------------------------------------------------------------------------------------------------------------------------------------------------------------------------------------------------------------------------------------------------------------------------------------------------------------------------------------------------------------------------------------------------------------------------------------------------------------------------------------------------------------------------------------------------------------------------------------------------------------------------------------------------------------------------------------------------------------------------------------------------------------------------------------------------------------------------------------------------------------------------------------|
| TGFB1 | growth factor | Activated | 2,761 | 2,823 | 0,003 | 1,61E-63 | 3,40E-60 | <p>AASS,ABCC2,ABCG1,ABCG2,ACAA2,ACE,ACKR1,ACSM3,ACTN1,ADAM10,ADAM17,ADCY9,ADI1,ADM,ADRA2A,AFM,AFP,AGR2,AHN AK,AHR,AIM2,ALB,ALDH18A1,ALDH2,ALDH3A2,ALDH5A1,ALDOB,ALOX5,ALOX5AP,ANKH,ANXA11,ANXA2,APOE,AQP1,ARF4,ARNT2,ARPC2,ASNS,ASS1,AVP,AXL,B2M,B4GAT1,BACE1,BARD1,BAX,BCL6,BHLHE40,BIN1,BMP7,BNIP3L,BUD31,C1QA,C1QB,C1R,C1S,C2,C3,C3AR1,CALM1 (includes others),CALML3,CALML4,CAMK2G,CAMK2N1,CAP1,CAPRIN1,CASP1,CASP3,CASP4,CASP8,CAT,CAV1,CAV2,CBFB,CBR3,CCDC28A,CCL18,CCL20,CCL5,CCL8,CCN3,CCNA2,CCNB1,CCNB2,CCND1,CCND2,CCND3,CCR2,CCR5,CCR7,CCT2,CCT5,CCT6A,CD14,CD163,CD300A,CD36,CD40,CD44,CD55,CD59,CD69,CD83,CD86,CDC42SE1,CDC7,CDH11,CDH5,CDHR2,CDK1,CDK2AP1,CDKN1B,CDKN1C,CDKN2C,CDKN3,CELF2,CELSR2,CFB,CFD,CFH,CHST8,CIDEA,CKM,CLDN1,CLIC4,CLU,CNN2,COL16A1,COL18A1,COL1A1,COL1A2,COL3A1,COL4A1,COL4A2,COL5A1,COL6A3,CORO1C,COTL1,CRIP2,CRMP1,CSF1R,CTCF,CTPS1,CTSB,CTSD,CTSK,CTSS,CUL5,CX3CR1,CXADR,CXCL1,CXCL10,CXCL12,CXCR4,CYBA,CYBB,CYC1,CYP17A1,CYP27B1,CYP3A7,DAB2,DCN,DCN,DCN,DCN,DKK3,DMTN,DNMT1,DNPEP,DOCK2,DOK1,DSG2,DUSP1,DYNLL1,DYRK2,EGF,EIF4A3,ELF4,ELK3,ELMO1,ENG,ENO1,ENO3,ERF,ERLIN2,ESM1,ESPL1,ESR2,EXT1,EXT2,F12,F2RL1,F3,FAM110B,FAS,FBN1,FCER1A,FCER1G,FCGR3A/FCGR3B,FERMT2,FGF7,FHL1,FLI1,FLNA,FLRT1,FN1,FNBP1,FNDC3B,FOS,FOSB,FOXO1,FSCN1,FTL,FUBP1,FUS,FXD5,FYN,FZD2,G6PC,GAD1,GADD45A,GADD45B,GARS1,GATM,GBP1,GBP2,GCLC,GJA1,GLS,GNAI2,GNAS,GNB5,GNG7,GPER1,GPR21,GPT,GZMA,GZMB,H1-10,HABP2,HADH,HEXB,HIF1A,HK1,HLA-DMA,HLA-DQA1,HLA-DQB1,HMOX2,HNF1A,HNF4A,HNMT,HOXB5,HPGD,HSD17B10,HSD3B2,HSPA5,HTR2B,HTRA1,ICAM1,ICAM2,ID1,ID2,ID3,IDI1,IFI16,IFI27,IFI30,IFIH1,IFIT3,IFRD1,IGFBP4,IGFBP6,IGFBP7,IGHM,IL10RA,IL13,IL15,IL18,IL1R1,IL2RB,IL32,IL33,IL36A,IL4R,IL6R,IMPDH1,INHA,INPP5D,IRF1,ITGA2,ITGA3,ITGA7,ITGAL,ITGAM,ITGAV,ITGB2,ITGB3,ITGB6,JUND,KDEL3,KDM5B,KITLG,KLF15,KLF9,KLRB1,KLRD1,KNK1,KRAS,KRT10,KRT19,KRT7,KRT81,LAMC1,LBR,LCN2,LEMD3,LITAF,LOC102724788/PRODH,LOXL1,LPAR1,LTBP3,MAF,MAOA,MAP2K3,MAP3K1,MAPK13,MCM2,ME2,MEF2C,MET,MFAP2,MGAT3,MGP,MIA2,MIA3,MID1,MLXIPL,MMP1,MMP2,MMP7,MMP9,MRC1,MSH6,MSMO1,MSN,MTHFD2,MTRR,MXI1,MYB,MYD88,MYH9,MYL12A,MYL3,MYL6,MYOF,NAB2,NAMPT,NBEA,NCF2,NDC80,NDUFS4,NEDD9,NET1,NGF,NIT1,NME1,NNMT,NOS2,NOX4,NPPA,NR1H3,NR4A1,NR4A3,NRP1,NUAK1,NUCB2,NUP62,OSTF1,OVOL1,P2RY14,P4HA1,PPA,PPCB,PCGF2,PCNA,PCOLCE2,PDCC4,PDGFRA,PDK2,PDLIM4,PDZK1IP1,PECAM1,PFKL,PFKP,PGAM2,PGRMC1,PGRMC2,PHG</p> |
|-------|---------------|-----------|-------|-------|-------|----------|----------|-------------------------------------------------------------------------------------------------------------------------------------------------------------------------------------------------------------------------------------------------------------------------------------------------------------------------------------------------------------------------------------------------------------------------------------------------------------------------------------------------------------------------------------------------------------------------------------------------------------------------------------------------------------------------------------------------------------------------------------------------------------------------------------------------------------------------------------------------------------------------------------------------------------------------------------------------------------------------------------------------------------------------------------------------------------------------------------------------------------------------------------------------------------------------------------------------------------------------------------------------------------------------------------------------------------------------------------------------------------------------------------------------------------------------------------------------------------------------------------------------------------------------------------------------------------------------------------------------------------------------------------------------------------------------------------------------------------------------------------------------------------------------------------------------------------------------------------------------------------------------------------------------------------------------------------------------------------------------------------------------------------------------------------------------------------------------------------------------------------------------------------------------------------------------------------------------------------------------------------------------------------------------------------------------------------------------------------------------------------------------------------------|

|       |        |                         |           |        |        |       |          |          |                                                                                                                                                                                                                                                                                                                                                                                                                                                                                                                                                                                                                                                                                                                                                                                                                                                                                                                                                                                                                                                                                                                                                                                                                                                                                                                                                                                                                                                                                                                                                                                                                                                                                                                                                                                                                                                                                                                                                                                                                                                                                                                                                                                                                                                                                                                                                                                      |
|-------|--------|-------------------------|-----------|--------|--------|-------|----------|----------|--------------------------------------------------------------------------------------------------------------------------------------------------------------------------------------------------------------------------------------------------------------------------------------------------------------------------------------------------------------------------------------------------------------------------------------------------------------------------------------------------------------------------------------------------------------------------------------------------------------------------------------------------------------------------------------------------------------------------------------------------------------------------------------------------------------------------------------------------------------------------------------------------------------------------------------------------------------------------------------------------------------------------------------------------------------------------------------------------------------------------------------------------------------------------------------------------------------------------------------------------------------------------------------------------------------------------------------------------------------------------------------------------------------------------------------------------------------------------------------------------------------------------------------------------------------------------------------------------------------------------------------------------------------------------------------------------------------------------------------------------------------------------------------------------------------------------------------------------------------------------------------------------------------------------------------------------------------------------------------------------------------------------------------------------------------------------------------------------------------------------------------------------------------------------------------------------------------------------------------------------------------------------------------------------------------------------------------------------------------------------------------|
| HNF4A | -0,438 | transcription regulator | Inhibited | -6,325 | -6,298 | 0,002 | 1,06E-61 | 1,79E-58 | <p>A1CF,AAMDC,AASS,ABCC2,ABCC3,ABCC6,ABCG1,ABHD10,ABHD6,ACAA2,ACAD8,ACAT1,ACO1,ACO2,ACOT13,ACOX1,ACOX2,ACOX3,ACSL1,ACSS3,ACTN1,ACTR3,ADCY7,ADH1B,ADH6,ADIPOR1,ADR2,AFP,AGPAT1,AHNAK,AK2,AKR1B1,ALB,ALDH1L1,ALDH2,ALDH3A1,ALDH5A1,ALDH8A1,ALDOB,AMT,ANAPC15,ANG,ANXA5,ANXA9,AOC1,APEH,APOA1,APOA4,APOC1,APOC3,APOE,APOH,APOM,AQP1,AQP3,ARFIP2,ARG2,ARL4C,ARPC5,ASNS,ATOX1,ATP6V1D,AVPI1,BAAT,BACE1,BARD1,BAZ1A,BCCIP,BCKDHA,BCL6,BCLAF1,BHMT,BLOC1S1,BLVRB,BMP7,BOLA1,BPHL,BST1,BTN2A1,BUD31,C11orf71,C1S,C2,C3,CALML4,CAP1,CAPZA2,CAT,CAV1,CBR3,CBX3,CCDC25,CCDC90B,CCNA2,CCNB1,CCND1,CCNG1,CCNH,CD1D,CD55,CDC123,CDHR2,CDK1,CDK5,CDKN1B,CENPU,CEP83,CEP350,CETN3,CHP1,CIDEC,CLCN6,CLDN1,CLDN3,CLPB,CLPTM1,CLPX,CLTCL1,CMC2,COA4,COA7,COASY,COPB1,COPS7A,COQ3,COQ4,COQ6,COQ8A,COX11,COX8A,CPT2,CRADD,CRAT,CRIP1,CRYZ,CRYZL1,CSK,CSTF2T,CTSB,CTSZ,CUL5,CUTC,CXADR,CYP11B,CYP27A1,CYP2A6 (includes others),CYP2B6,CYP2C8,CYP2J2,CYP3A4,CYP3A7,CYP4F2,DCAF11,DCAF8,DCK,DDOST,DDX10,DDX25,DDX47,DEPP1,DERL1,DLST,DNAJA3,DNAJB9,DNPH1,DPAGT1,DTL,DUSP3,DYNC1L1,EBP,EIC2,EED,EIF4EBP2,EIF4ENIF1,EIF5,ELMO1,ENC1,EPHX1,ESYT1,ETF,DH,ETNK2,ETNPPL,EVPL,F11,F12,FABP1,FABP2,FAHD2A,FAM117A,FAM50B,FANCF,FAS,FBP1,FDX1,FGF13,FGF7,FH,FHIT,FHL1,FKBP3,FLNA,FMO1,FOXO1,FUT3,FUT6,FUZ,FZD6,G0S2,G6PC,GADD45B,GADD45G,GATB,GCHFR,GDAP2,GGCX,GHITM,GINS2,GIPC2,GJB1,GLYAT,GMDS,GNAI3,GNL3,GOLGA4,GOLIM4,GOT1,GPATCH3,GPT,GPX7,GRHPR,GSS,GSTA1,GSTK1,GSTM4,GSTO1,GSTZ1,GTF2E1,HAAS,HAADHA,HAO1,HAO2,HBQ1,HDAC6,HGD,HIF1A,HIKESH1,HIRIP3,HLA-A,HLA-B,HLA-C,HLA-F,HLA-G,HMGB2,HMGN4,HMOX2,HNF1A,HNF1B,HNF4A,HNRNPR,HPD,HPF1,HPN,HSDL2,HSP90B1,HSPA4L,HSPA5,HSPA8,IER5,IFI30,IFITM2,IFNGR1,IFT122,IL10RA,IL15,IL2RB,INTS9,INVS,IPO13,ISOC1,ISOC2,ITGAL,KCNN2,KIF20A,KIF22,KLF15,KLHL20,KNG1,KPNB1,KPTN,KRT10,KRT7,L2HGDH,LAMTOR5,LARP4,LCN2,LEPR,LIPA,LOC102724788/PRODH,LPGAT1,LRP5,LSM4,LTF,MAIP1,MAOA,MAOB,MAP7,MAPK8IP2,MAT2A,MCCC1,MCM3,MDH2,MFSD1,MGST2,MICU1,MID1,MLXIPL,MMUT,MPP1,MPZL2,MRM3,MRPL2,MRPL24,MRPL34,MRPL4,MRPL44,MRPL46,MRPL49,MRPS12,MRPS15,MRPS35,MRP7,MSN,MSRB1,MSRB2,MT1X,MTHFD1,MTNR1A,MTPP,MYL6,NAMPT,NAPA,NARS2,NAT10,NAT8,NBEA,NCK1,NDC80,NDRG1,NDUFA3,NDUFA7,NDUFS1,NDUFS3,NDUFS4,NDUFV1,NFE2L1,NFE2L2,NFKBIL1,NFS1,NME1,NOD2,NOP16,NOP53,NOX4,NR0B2,NR1H2,NR1H3,NR1I3,NR2F2,NSF,NTRK2,NUAK1,NUCB1,NUDT6,NUP54,NUP62,OAS3,OGDH,OGFOD2,OPA1,ORMDL2,OSMR,OVOL1,P2RY14,P</p> |
|-------|--------|-------------------------|-----------|--------|--------|-------|----------|----------|--------------------------------------------------------------------------------------------------------------------------------------------------------------------------------------------------------------------------------------------------------------------------------------------------------------------------------------------------------------------------------------------------------------------------------------------------------------------------------------------------------------------------------------------------------------------------------------------------------------------------------------------------------------------------------------------------------------------------------------------------------------------------------------------------------------------------------------------------------------------------------------------------------------------------------------------------------------------------------------------------------------------------------------------------------------------------------------------------------------------------------------------------------------------------------------------------------------------------------------------------------------------------------------------------------------------------------------------------------------------------------------------------------------------------------------------------------------------------------------------------------------------------------------------------------------------------------------------------------------------------------------------------------------------------------------------------------------------------------------------------------------------------------------------------------------------------------------------------------------------------------------------------------------------------------------------------------------------------------------------------------------------------------------------------------------------------------------------------------------------------------------------------------------------------------------------------------------------------------------------------------------------------------------------------------------------------------------------------------------------------------------|

|      |          |           |       |       |       |          |          |                                                                                                                                                                                                                                                                                                                                                                                                                                                                                                                                                                                                                                                                                                                                                                                                                                                                                                                                                                                                                                                                                                                                                                                                                                                                                                                                                                                                                                                                                                                                                                                                                                                                                                                                                                                                                                                                                                                                                                                                                                                                                                                                                                                                                                                                                                                                                                                                                                      |
|------|----------|-----------|-------|-------|-------|----------|----------|--------------------------------------------------------------------------------------------------------------------------------------------------------------------------------------------------------------------------------------------------------------------------------------------------------------------------------------------------------------------------------------------------------------------------------------------------------------------------------------------------------------------------------------------------------------------------------------------------------------------------------------------------------------------------------------------------------------------------------------------------------------------------------------------------------------------------------------------------------------------------------------------------------------------------------------------------------------------------------------------------------------------------------------------------------------------------------------------------------------------------------------------------------------------------------------------------------------------------------------------------------------------------------------------------------------------------------------------------------------------------------------------------------------------------------------------------------------------------------------------------------------------------------------------------------------------------------------------------------------------------------------------------------------------------------------------------------------------------------------------------------------------------------------------------------------------------------------------------------------------------------------------------------------------------------------------------------------------------------------------------------------------------------------------------------------------------------------------------------------------------------------------------------------------------------------------------------------------------------------------------------------------------------------------------------------------------------------------------------------------------------------------------------------------------------------|
| IFNG | cytokine | Activated | 8,670 | 8,748 | 0,004 | 2,79E-59 | 3,93E-56 | A2M,ABCC1,ACE,ACO1,ACTB,ADA2,ADAM17,ADCY7,ADGRG1,ADM,ADRA2A,AGPAT1,AGRN,AHGY,AHR,AIM2,ALDH1A3,ALDH1L1,ALDH7A1,ALOX5AP,ALPL,APOBEC3G,APOL1,AQP1,ARAP2,ARC,ARG2,ARL6IP5,ARNT2,ASNS,ASS1,ATF3,AZGP1,B2M,BACE1,BACH2,BAX,BCL2A1,BCL2L2,BID,BIRC2,BIRC3,BLNK,BST1,BST2,BTN3A1,BTN3A2,C1QA,C1QB,C1R,C2,C3,CALB1,CAPN3,CASP1,CASP3,CASP4,CASP6,CASP8,CAT,CAV1,CCL18,CCL19,CCL20,CCL5,CCL8,CNA2,CCND1,CCND2,CCND3,CCR2,CCR5,CD14,CD163,CD1D,CD2,CD200,CD36,CD38,CD40,CD44,CD55,CD63,CD74,CD83,CD86,CDH5,CDKN1B,CDX2,CELSR2,CFB,CHRND,CHST8,CIRBP,CISH,CLEC10A,CLEC7A,CLIC4,CLIC5,COL1A1,COL1A2,COL5A2,CORO1A,CRABP1,CSE1L,CSF1R,CSF2RB,CSK,CTSB,CTSD,CTSK,CTSS,CTSV,CTSZ,CX3CR1,CXADR,CXCL1,CXCL10,CXCL11,CXCL12,CXCL6,CXCL9,CXCR4,CYB5A,CYBA,CYBB,CYP27A1,CYP3A4,DDB2,DDIT3,DDX58,DDX60,DECR1,DEFB1,DEPP1,DHX9,DIO1,DOK1,DPP4,DUSP1,DUSP9,EFNB2,EGF,EGOT,EHF,ENO1,ERAP1,ESM1,ETV7,F2RL1,F3,FAAH,FAH,FANCF,FAS,FBP1,FCER1G,FCGR2B,FCGR3A/FCGR3B,FCN1,FGF1,FGL2,FHL2,FKBP5,FKBP6,FN1,FOS,FOSB,FOXO1,FTL,FZD2,GAD1,GAL3ST1,GBP1,GBP2,GCH1,GCHFR,GJA1,GLS,GLUL,GNAI2,GNAS,GNB5,GNG7,GPER1,GPT,GRK2,GSTP1,GZMB,HAAO,HCK,HCP5,HERC6,HIF1A,HLA-A,HLA-B,HLA-C,HLA-DMA,HLA-DMB,HLA-DOA,HLA-DOB,HLA-DQA1,HLA-DQB1,HLA-DRA,HLA-DRB1,HLA-E,HLA-F,HLA-G,HSPA5,HSPA8,HTRA1,ICAM1,ID1,IDH3B,IDI1,IDO1,IFI16,IFI27,IFI30,IFI35,IFI44,IFI44L,IFI6,IFIH1,IFIT2,IFIT3,IFIT5,IFITM1,IFITM2,IFNGR1,IFNGR2,IGFBP4,IL10RA,IL13,IL15,IL15RA,IL18,IL1R1,IL32,IL4R,IL6R,IL7,IL7R,INSR,IRAK1,IRF1,IRF2,IRF7,IRF8,IRF9,ISG15,ISG20,ITGAL,ITGAM,ITGAV,ITGB2,ITGB3,JUND,KCTD12,KITLG,KMO,KRAS,KRT19,KYAT1,KYNU,LAMC1,LAMP3,LCN2,LCP2,LGALS3BP,LST1,LTB,LY96,LYN,MAFF,MARCKSL1,MAT2A,MIF,MMP1,MMP2,MMP9,MNDA,MRAS,MRC1,MSH2,MT1F,MT1G,MUC1,MX1,MX2,MYB,MYD88,MYH9,NAMPT,NCALD,NCF2,NEDD9,NFE2L1,NFKB1,NGF,NMI,NOD2,NOS2,NOX4,NR1H2,NTRK2,OAS1,OAS2,OAS3,OPTN,P2RY14,PANX1,PAPPA,PBK,PCDH17,PCK1,PCTP,PEA15,PECAM1,PFKFB3,PFKL,PHGDH,PIGR,PKM,PLA2G7,PLAAT3,PLAAT4,PLD1,PLEK,PLSCR1,PPARA,PPARGC1A,PRDX2,PRKCA,PRKCD,PRKCQ,PRNP,PRSS8,PSMA4,PSMA6,PSMB10,PSMB8,PSMB9,PSME1,PTGES,PTGES2,PTPN6,RAB17,RAB27A,RAB38,RAC2,RACK1,RAP2B,RARRES1,RB1,RBBP7,RGN,RHOB,RORC,RSAD2,RSPH14,RTP4,RUNX3,S100A10,S100A8,S100A9,SAMD9,SAMHD1,SCNN1B,SDC1,SEC11A,SELL,SELP,SERPINA5,SERPINB9,SERPING1,SFRP1,SGPL1,SHARPIN,SLC12A2,SLC15A3,SLC16A3,SLC1A3,SLC25A5,SLC28A1,SLC29A1,SLC2A11,SLC2A2,SLC37A4,SLC4A4,SLC5A2,SLC9A3,SLPI,SMAD1,SMAD7,SMAGP,SMTN,SOAT1,SOCS2,SOD2,SP110,SP3,SPON1,SP |
|------|----------|-----------|-------|-------|-------|----------|----------|--------------------------------------------------------------------------------------------------------------------------------------------------------------------------------------------------------------------------------------------------------------------------------------------------------------------------------------------------------------------------------------------------------------------------------------------------------------------------------------------------------------------------------------------------------------------------------------------------------------------------------------------------------------------------------------------------------------------------------------------------------------------------------------------------------------------------------------------------------------------------------------------------------------------------------------------------------------------------------------------------------------------------------------------------------------------------------------------------------------------------------------------------------------------------------------------------------------------------------------------------------------------------------------------------------------------------------------------------------------------------------------------------------------------------------------------------------------------------------------------------------------------------------------------------------------------------------------------------------------------------------------------------------------------------------------------------------------------------------------------------------------------------------------------------------------------------------------------------------------------------------------------------------------------------------------------------------------------------------------------------------------------------------------------------------------------------------------------------------------------------------------------------------------------------------------------------------------------------------------------------------------------------------------------------------------------------------------------------------------------------------------------------------------------------------------|

|      |       |                         |       |       |       |          |          |                                                                                                                                                                                                                                                                                                                                                                                                                                                                                                                                                                                                                                                                                                                                                                                                                                                                                                                                                                                                                                                                                                                                                                                                                                                                                                                                                                                                                                                                                                                                                                                                                                                                                                                                                                                                                                                                                                                                                                                                                                                                                                                                                                                                                                                                                                                                                              |
|------|-------|-------------------------|-------|-------|-------|----------|----------|--------------------------------------------------------------------------------------------------------------------------------------------------------------------------------------------------------------------------------------------------------------------------------------------------------------------------------------------------------------------------------------------------------------------------------------------------------------------------------------------------------------------------------------------------------------------------------------------------------------------------------------------------------------------------------------------------------------------------------------------------------------------------------------------------------------------------------------------------------------------------------------------------------------------------------------------------------------------------------------------------------------------------------------------------------------------------------------------------------------------------------------------------------------------------------------------------------------------------------------------------------------------------------------------------------------------------------------------------------------------------------------------------------------------------------------------------------------------------------------------------------------------------------------------------------------------------------------------------------------------------------------------------------------------------------------------------------------------------------------------------------------------------------------------------------------------------------------------------------------------------------------------------------------------------------------------------------------------------------------------------------------------------------------------------------------------------------------------------------------------------------------------------------------------------------------------------------------------------------------------------------------------------------------------------------------------------------------------------------------|
| TP53 | 0,368 | transcription regulator | 2,950 | 2,974 | 0,001 | 1,46E-56 | 1,76E-53 | <p>A2M,ABAT,ABCC1,ABCC2,ABCG2,ACAA2,ACACB,ACADL,ACADM,ACADS,ACADVL,ACAT1,ACE,ACO1,ACO2,ACOT11,ACSF2,ACSL1,ACSM5,ACTB,ACTN1,ADA,ADD3,ADGRE5,ADH5,ADRB2,AFP,AHCY,AKAP12,AKR1B1,ALB,ALDH18A1,ALDH1B1,ALDH4A1,ALDH9A1,ALOX5,ANKH,ANXA1,ANXA2,ANXA3,ANXA4,APOA1,APOE,APOL1,AQP3,ARAP2,ARPC1B,ASL,ASNS,ASS1,ATF3,ATG4A,AURKA,BAG1,BAX,BCAS3,BCL2A1,BHLHE40,BHLHE41,BID,BIRC2,BIRC3,BNIP3,C2,CALCRL,CALU,CAMK2N1,CAP1,CARHSP1,CASP1,CASP3,CASP4,CASP6,CASP8,CAT,CAV1,CAV2,CCL5,CCNA2,CCNB1,CCNB1P1,CCNB2,CCND1,CCND2,CCND3,CCNG1,CCS,CD247,CD36,CD44,CD47,CD59,CD81,CDC25B,CDC7,CDH3,CDK1,CDKN1B,CDKN3,CEL,CEP55,CES2,CHST12,CHUK,CKAP2,CKM,CLIC4,CLPP,CLU,CLUH,CNN2,COL18A1,COL1A1,COL1A2,COL3A1,COL4A1,COL4A2,COL5A2,COMT,COPB1,COQ2,COQ3,COQ4,COQ6,COQ8A,CORO1A,COX11,COX15,COX6A2,CPT2,CSF1R,CSHL1,CSK,CSTB,CTF1,CTSB,CTSD,CTSF,CTSK,CXCL1,CXCL10,CXCL12,CYB5A,CYFIP2,DCK,DBB2,DDIT3,DDR1,DDX39A,DDX56,DEK,DHCR7,DHRS9,DICER1,DKK3,DLAT,DLGAP5,DLST,DNAJA3,DNAJB5,DNAJC12,DNM1L,DNMT1,DOK1,DPEP1,DPP4,DRAM1,DSTN,DTYMK,DUSP1,EBAG9,ECH1,EGF,EIF4G2,EIF4G3,EIF5,ELF4,ENG,ENO3,ENPP2,EPHX1,ERF,ESPL1,ESR1,ESRRG,ETFA,EZH2,F3,FAS,FERMT2,FGF13,FGF7,FH,FHL1,FHL2,FKBP3,FKBP4,FKBP5,FKBP6,FMO1,FN1,FOS,FOSL1,FOXO1,FSTL1,FUBP1,FYN,FZD6,G0S2,G6PC,GADD45A,GADD45B,GADD45G,GATM,GBP1,GJA1,GLB1,GLIPR1,GLRX,GLUL,GNAI1,GNAI2,GNL3,GOLGA4,GPD1,GPD1L,GPR162,GPX3,GSR,GSTP1,HADH,HADHA,HIF1A,HLA-B,HLA-DQA1,HMGB2,HS3ST1,HSPA4L,HSPA8,HYAL1,ICAM1,ID1,ID2,ID3,LDH1,LDH3G,IER5,IFI16,IFI30,IFI35,IGFBP4,IGFBP7,IL10RA,IL4R,IL7,ILNG2,INKA2,INSR,IRF7,IRF8,IRF9,ISG15,ITGA2,ITGAV,JUND,KCNJ2,KIF22,KITLG,KPNB1,LAMA5,LAMC1,LBR,LIMA1,LMAN2,LOC102724788/PRODH,LPIN1,LRRC3,LSP1,LYZ,MACROH2A1,MAD2L1,MAFB,MAP2K3,MAP4K2,MAPK12,MCAM,MCAT,MCM2,MCM3,MCM5,MCM6,MCM7,MDH2,ME1,ME2,MELK,MET,MFAP2,MGST2,MLF2,MMP1,MMP2,MMP9,MPDZ,MPI,MPZL2,MRPL16,MRPL2,MRPL34,MRPL46,MRPS2,MSH2,MSH6,MSRB1,MX1,MYH9,MYL3,MYOF,NAMPT,NAP1L1,NCK2,NDC80,NDRG1,NDUFAF1,NDUFS1,NDUFS3,NFKB1,NFS1,NID2,NKX2-5,NME1,NOS2,NOX4,NR0B2,NRP1,OAS1,OAT,OGDH,OPA1,OSGIN1,OXAL1,P2RY14,P4HA1,P4HB,PALLD,PBK,PCCA,PCGF2,PCK1,PCCLAF,PCNA,PDE6A,PDGFRA,PDIA5,PDIA6,PDK2,PDK3,PDLIM1,PSS2,PEA15,PECAM1,PERP,PFKFB3,PFKP,PFN1,PGAM2,PHGDH,PHLDA3,PIK3CB,PIK3R3,PINK1,PKM,PLAAT3,PLAAT4,PLEKHB2,PLK2,PLOD2,PLPBP,PLTP,PMM1,POLE2,POSTN,PPARA,PPARGC1A,PPFIBP1,PPIC,PPM1D,PPP1R15A,PPT1,PRC1,PRDX2,PRDX3,PRI</p> |
|------|-------|-------------------------|-------|-------|-------|----------|----------|--------------------------------------------------------------------------------------------------------------------------------------------------------------------------------------------------------------------------------------------------------------------------------------------------------------------------------------------------------------------------------------------------------------------------------------------------------------------------------------------------------------------------------------------------------------------------------------------------------------------------------------------------------------------------------------------------------------------------------------------------------------------------------------------------------------------------------------------------------------------------------------------------------------------------------------------------------------------------------------------------------------------------------------------------------------------------------------------------------------------------------------------------------------------------------------------------------------------------------------------------------------------------------------------------------------------------------------------------------------------------------------------------------------------------------------------------------------------------------------------------------------------------------------------------------------------------------------------------------------------------------------------------------------------------------------------------------------------------------------------------------------------------------------------------------------------------------------------------------------------------------------------------------------------------------------------------------------------------------------------------------------------------------------------------------------------------------------------------------------------------------------------------------------------------------------------------------------------------------------------------------------------------------------------------------------------------------------------------------------|

|     |       |          |           |       |       |       |          |          |                                                                                                                                                                                                                                                                                                                                                                                                                                                                                                                                                                                                                                                                                                                                                                                                                                                                                                                                                                                                                                                                                                                                                                                                                                                                                                                                                                                                                                                                                                                                                                                                                                                                                                                                                                                                                                                                                                                                                                                                                                                                                                                                                                                                                                                                                                                                                                                                                                                                                                                                                                                                                                                   |
|-----|-------|----------|-----------|-------|-------|-------|----------|----------|---------------------------------------------------------------------------------------------------------------------------------------------------------------------------------------------------------------------------------------------------------------------------------------------------------------------------------------------------------------------------------------------------------------------------------------------------------------------------------------------------------------------------------------------------------------------------------------------------------------------------------------------------------------------------------------------------------------------------------------------------------------------------------------------------------------------------------------------------------------------------------------------------------------------------------------------------------------------------------------------------------------------------------------------------------------------------------------------------------------------------------------------------------------------------------------------------------------------------------------------------------------------------------------------------------------------------------------------------------------------------------------------------------------------------------------------------------------------------------------------------------------------------------------------------------------------------------------------------------------------------------------------------------------------------------------------------------------------------------------------------------------------------------------------------------------------------------------------------------------------------------------------------------------------------------------------------------------------------------------------------------------------------------------------------------------------------------------------------------------------------------------------------------------------------------------------------------------------------------------------------------------------------------------------------------------------------------------------------------------------------------------------------------------------------------------------------------------------------------------------------------------------------------------------------------------------------------------------------------------------------------------------------|
| TNF | 0,121 | cytokine | Activated | 8,219 | 8,293 | 0,003 | 2,37E-56 | 2,51E-53 | <p>A2M,ABCC1,ABCC2,ABCC3,ABCG2,ABTB2,ACACA,ACADM,ACAD S,ACADVL,ACE,ACKR3,ACOX1,ACP5,ACSL1,ACTB,ADAM17,ADM, ADRB2,AEBP1,AK2,AKAP12,AKR1B1,ALAD,ALB,ALDH1A3,ALDH2, ALDH3A1,ALOX5,ALOX5AP,ANXA1,ANXA11,APOA1,APOBEC3B,AP OE,APOL1,AQP1,AQP3,ARC,ARF4,ARHGDI3,ARHGEF17,ARL6IP5, ASS1,ATF3,ATP2B4,AVP,B2M,BACE1,BAX,BBOX1,BCKDHA,BCKD HB,BCL2A1,BCL2L13,BCL2L2,BCL6,BHLHE40,BHLHE41,BID,BIRC2 ,BIRC3,BLVRA,BST2,BTN3A3,C3,C3AR1,CA2,CALR,CARD8,CASP1 ,CASP3,CASP4,CASP6,CASP8,CAT,CAV1,CAVIN3,CBR3,CCL18,C CL19,CCL20,CCL5,CCN3,CCND1,CCND2,CCND3,CCR2,CCR5,CCR 7,CD14,CD163,CD1C,CD200,CD247,CD36,CD38,CD40,CD44,CD47, CD55,CD59,CD69,CD83,CD86,CDH11,CDH3,CDH5,CDKN2C,CFB,C FD,CHRND,CIB2,CIDEC,CISH,CKM,CLIC4,CLTCL1,CLU,COL15A1,C OL16A1,COL1A1,COL1A2,COL3A1,COTL1,CPA3,CPT2,CRADD,CS F1R,CSF2RB,CSGALNACT1,CST7,CTSB,CTSF,CTSK,CTSS,CTSZ, CX3CR1,CXCL1,CXCL10,CXCL11,CXCL12,CXCL6,CXCL9,CXCR4,C YBA,CYBB,CYP17A1,CYP1B1,CYP27A1,CYP27B1,CYP2C8,CYTIP, DCN,DDIT3,DDX58,DENND2,DEPP1,DGAT1,DHRS3,DIO1,DLEU1, DNMT1,DPP4,DPYS,DUSP1,DUSP9,DVL1,ECH1,EFNB2,EGOT,EHD 1,EHF,EIF2B2,ELK3,ENG,ENPP2,ENTPD5,ESM1,ESR1,EXT1,F2RL1 ,F3,FABP1,FAS,FCER1G,FCGR2B,FCGRT,FMO1,FN1,FNBP1,FOS, FOSB,FOSL1,FOXO1,FOXO4,FPR1,FRZB,FSCN1,FUT3,FUT4,FYN, FZD5,G0S2,GADD45A,GADD45B,GADD45G,GASK1B,GBP1,GBP2, GCH1,GCLC,GCLM,GHR,GJA1,GLS,GM2A,GNAI1,GNAI2,GNAI3,GO SR2,GPD1,GRN,GSTA1,GSTP1,HDAC1,HERC1,HEXB,HIF1A,HIPK3 ,HLA-A,HLA-B,HLA-DRA,HLA-E,HLA-F,HLA- J,HMGN3,HNF4A,HPGD,HPGDS,HPRT1,HSD3B2,HSP90B1,HSPA5, HSPA8,ICAM1,ICAM2,ID1,ID3,IDO1,IFI16,IFI27,IFI6,IFIH1,IFIT3,IFIT5, IFITM1,IFNAR2,IFNGR1,IFNGR2,IGFBP4,IGFBP6,IGKC,IL10RA,IL13, IL15,IL15RA,IL18,IL1R1,IL32,IL33,IL36A,IL4R,IL7,IL7R,INHA,INPP5D,I NSR,IRF1,IRF7,IRF8,ISG15,ITGA2,ITGAL,ITGAM,ITGAV,ITGB2,ITGB 3,ITGB6,ITGB8,JAK1,JUND,KCNJ2,KIF20A,KITLG,KL,KLRB1,KMO,K YNU,LAMC1,LAMP3,LCN2,LITAF,LPAR6,LRR8D,LTB,LXN,LY96,LY N,MAFF,MAP2K3,MAP4K4,MAPKAP1,MARCKSL1,MAT2A,MCAM,MC M3,MECOM,MEF2C,MET,MFHAS1,MGP,MGST2,MIF,MMD,MMP1, MMP2,MMP7,MMP9,MPC1,MSH2,MTTP,MUC1,MX1,MYD88,MYH9,M YL6,NAGLU,NAMPT,NCF2,NCK1,NEDD9,NET1,NFE2L2,NFKB1,NFK BIE,NFS1,NGF,NME1,NNMT,NOCT,NOD2,NOS2,NOX4,NPHS1,NPP A,NR0B2,NR1H3,NR1I3,NR4A1,NR4A3,NRP1,NUAK1,NUCB2,OAS1, OAS2,OAS3,OLFML2B,OPTN,OSMR,P4HB,PAK2,PAPPA,PARP1,P C,PCBP2,PCK1,PCK2,PCNA,PDGFRA,PDIA4,PK3,PDZD2,PECAM 1,PEMT,PHB,PHGDH,PIGR,PIK3C2B,PIK3CB,PKM,PLA2G4A,PLA2 G4C,PLAAT3,PLAAT4,PLAGL2,PLIN2,PLK2,PLOD2,PLSCR1,POST N,POU2AF1,PPARA,PPARGC1A,PPP1R15A,PPP1R3C,PRKCA,PRK C,PRK D,PRK E,PRK F,PRK G,PRK H,PRK I,PRK J,PRK K,PRK L,PRK M,PRK N,PRK O,PRK P,PRK Q,PRK R,PRK S,PRK T,PRK U,PRK V,PRK W,PRK X,PRK Y,PRK Z,PTEN,PTGF2C,PT</p> |
|-----|-------|----------|-----------|-------|-------|-------|----------|----------|---------------------------------------------------------------------------------------------------------------------------------------------------------------------------------------------------------------------------------------------------------------------------------------------------------------------------------------------------------------------------------------------------------------------------------------------------------------------------------------------------------------------------------------------------------------------------------------------------------------------------------------------------------------------------------------------------------------------------------------------------------------------------------------------------------------------------------------------------------------------------------------------------------------------------------------------------------------------------------------------------------------------------------------------------------------------------------------------------------------------------------------------------------------------------------------------------------------------------------------------------------------------------------------------------------------------------------------------------------------------------------------------------------------------------------------------------------------------------------------------------------------------------------------------------------------------------------------------------------------------------------------------------------------------------------------------------------------------------------------------------------------------------------------------------------------------------------------------------------------------------------------------------------------------------------------------------------------------------------------------------------------------------------------------------------------------------------------------------------------------------------------------------------------------------------------------------------------------------------------------------------------------------------------------------------------------------------------------------------------------------------------------------------------------------------------------------------------------------------------------------------------------------------------------------------------------------------------------------------------------------------------------------|





|     |          |           |       |       |       |          |          |                                                                                                                                                                                                                                                                                                                                                                                                                                                                                                                                                                                                                                                                                                                                                                                                                                                                                                                                                                                                                                                                                                                                                                                                                                                                                                                                                                                                                                                                                                                                                                                                                                                                                                                                                                                                                                                                                                                                                                                                                                                                                                                                                                                                                                                                                                                                                                                                                                                                                                                                                                                                                                                                                                                                                                                                                                                                                                                                                                                                                                                                                                                                                                                                                                                                      |
|-----|----------|-----------|-------|-------|-------|----------|----------|----------------------------------------------------------------------------------------------------------------------------------------------------------------------------------------------------------------------------------------------------------------------------------------------------------------------------------------------------------------------------------------------------------------------------------------------------------------------------------------------------------------------------------------------------------------------------------------------------------------------------------------------------------------------------------------------------------------------------------------------------------------------------------------------------------------------------------------------------------------------------------------------------------------------------------------------------------------------------------------------------------------------------------------------------------------------------------------------------------------------------------------------------------------------------------------------------------------------------------------------------------------------------------------------------------------------------------------------------------------------------------------------------------------------------------------------------------------------------------------------------------------------------------------------------------------------------------------------------------------------------------------------------------------------------------------------------------------------------------------------------------------------------------------------------------------------------------------------------------------------------------------------------------------------------------------------------------------------------------------------------------------------------------------------------------------------------------------------------------------------------------------------------------------------------------------------------------------------------------------------------------------------------------------------------------------------------------------------------------------------------------------------------------------------------------------------------------------------------------------------------------------------------------------------------------------------------------------------------------------------------------------------------------------------------------------------------------------------------------------------------------------------------------------------------------------------------------------------------------------------------------------------------------------------------------------------------------------------------------------------------------------------------------------------------------------------------------------------------------------------------------------------------------------------------------------------------------------------------------------------------------------------|
| IL4 | cytokine |           | 0,872 | 0,953 | 0,005 | 1,01E-42 | 8,52E-40 | <p>ACOX1,ACP5,ACSL1,ACTG1,ADAM17,AHNAK,AHR,AK2,ALDH2,ALOX5,ALOX5AP,ANXA1,ANXA2,ANXA4,APOE,APOLD1,APRT,ARG2,ARNTL2,ARSB,ASCC3,ASS1,ATP1A3,AUH,BAX,BCL11A,BCL6,BHLHE40,BIN1,BIRC2,BNIP3,BNIP3L,C3,CA2,CAPG,CASP3,CASP6,CAT,CBFB,CBX3,CCL18,CCL20,CCL5,CCL8,CCND1,CCND2,CCND3,CCR5,CCR7,CCT3,CD14,CD163,CD1C,CD2,CD200,CD300A,CD36,CD38,CD40,CD44,CD55,CD58,CD69,CD74,CD83,CD86,CD8A,CDK1,CDKN1B,CELF2,CISH,CKAP4,CLCN3,CLEC10A,CLEC7A,CLUH,COL1A1,COL1A2,COL6A3,CRADD,CRIP1,CSF1R,CSF2RB,CST7,CTNS,CTSK,CXCL1,CXCL10,CXCL11,CXCL6,CXCL9,CXCR4,CYB5A,CYBB,DARS2,DDAH1,DECR1,DHODH,DOCK10,DPP4,EPHX1,EXT1,F2RL1,F3,FAAH,FAM49A,FAS,FCER1G,FCGR2B,FCGR3A/FCGR3B,FKBP5,FLNA,FN1,FOS,FOSB,FSCN1,GADD45G,GALK2,GATB,GATM,GBP2,GCAT,GJA1,GPM6B,GPT,GZMA,HCK,HCLS1,HDA,C1,HDCC2,HLA-DMA,HLA-DMB,HPGD,HRH1,HSD3B2,ICAM1,ID3,IDO1,IFI16,IFI30,IFI44,IFIH1,IFIT3,IFNAR2,IFNGR2,IGFBP4,IL10RA,IL13,IL13RA1,IL15,IL15RA,IL18,IL1R1,IL2RB,IL33,IL4R,IL7R,IRF1,IRF7,IRF8,IRF9,ISG15,ITGA2,ITGAL,ITGAV,ITGB2,ITGB3,ITPA,JAK1,JCHAIN,JUND,KCNAB2,KCTD12,KITLG,KLHDC2,KLRB1,KLRD1,KMO,KRT10,LCP2,LGALS1,LGALS2,LGALS3BP,LGALSL,LMAN2,LRPPRC,LSP1,LTB,LY75,MAF,MAFB,MAL,MAOA,MCM5,MMP1,MMP2,MMP9,MRC1,MS4A1,MSH2,MUC1,MYH9,MYOF,NAB2,NAP1L1,NCL,NDRG1,NEDD9,NFIL3,NFKB1,NOCT,NOS2,NR4A3,NRP1,NUP155,NUP214,OAS3,PFKL,PFKP,PHB,PIGR,PLA2G4C,PLD1,PLIN2,PLOD2,PLSCR1,PMP22,PMS1,PMVK,PNP,POLE2,POSTN,POU2AF1,PPARGC1A,PRF1,PRKCA,PRKCD,PRMT1,PRNP,PRSS8,PSMA6,PSMB10,PSMB6,PSMB8,PSME1,PSMG1,PTPRCAP,RHOA,RIDA,RIN1,RNF19B,RNPS1,S100A10,S100A8,S100A9,SAMSN1,SDF2L1,SEC31A,SELL,SELP,SEMA4D,SH2D1A,SLC29A1,SMC3,SNX4,SOCS2,SOX13,SPHK2,SPINT2,SPP1,ST14,ST6GAL1,ST7,STAB1,STAT1,STAT4,STK39,STUB1,SWAP70,SYK,SYNGR2,SYT11,TAP2,TAPBP,TBC1D17,TEC,TFEC,TFF3,TGFBI,TGFB2,THY1,TIMP1,TIMP2,TLE1,TLN2,TLR2,TLR4,TM7SF2,TNC,TNFRSF11B,TNFRSF17,TP53,TREM2,TLXNA,TYRO3,UBL3,UQCRC1,USP2,VCAM1,VDR,VEGFA,VIM,VPS13C,VPS35,VTGN1,XBP1,XPOA2M,ABCC1,ABCC3,ABCC5,ABCC8,ABCG1,ACAA1,ACE,ACSL5,ADAM17,ADAMTS1,ADH5,AFP,AHR,AKAP3,ALB,ALDH3B1,ANXA1,ANXA11,ANXA2,ANXA3,ANXA9,ARL4C,ASNS,ATF3,ATP2B4,ATP9A,B2M,BAIAP2,BBOX1,BHLHE40,BST1,C1R,C1S,CAP1,CASP4,CAT,CBX3,CCL20,CCL5,CCND1,CCND2,CCT2,CDA,CDH3,CDKN1B,CGA,CISH,CKM,CLEC2B,CLPP,CLPX,COL1A1,COL1A2,COL3A1,COX7B,CSST6,CTSV,CXADR,CXCL1,CXCL10,CXCL12,CYP1B1,DENND5A,DHR S3,DHX9,DNM1L,ECM2,EMP3,ERBB3,ETFB,EVPL,EXOSC10,F3,FLNA,FMO5,FN1,FOS,FOSB,FOSL1,GADD45G,GBP1,GBP2,GCA,GFFT1,GLUL,GPNMB,GRHPR,HIF1A,HIPK3,HLA-A,HLA-B,HLA-C,HLA-F,HMG20B,HMGN4,HSD11B2,HSF4,HSPA5,ICAM1,ID1,ID2,IFI35,IFNGR1,IGFBP6,IL13,IL13RA1,IL15,IL15RA,IL18,IL32,IL33,IL4R,IL6R,IL7,IRAK1,IRF1,IRF7,IRF9,ISG20,ITGA7,ITGAL,KLK1,KPNB1,KRT19,LCN2,LITAF,LRRFIP1,LSM4,MAOA,MARCKS,MCM7,MLLT11,MMP1,MP2,MMP9,MPDU1,MPZL2,MRC1,MT1X,MX1,MYD88,NAMPT,NEDD4L,NMT2,NOS2,NR113,NUAK1,OAS1,OGDH,OSMR,PAK2,PCNA,PCD4,PDZK1IP1,PEPD,PFKFB2,PFKFB3,PIGR,PKIG,PLA2G4A,PLCB4,PRDX2,PSMB8,PSMB9,PTEN,PTGES,PTOV1,PTP4A1,PYGL,QSOX1,RAB31,RARG,RBFOX2,RORA,RYK,S100A8,S100A9,SCNN1B,SERP, SERPINA3,SERPINB1,SERPING1,SLC16A3,SLC7A8,SLPI,SMPD1,SPP1,STAT1,STAT3,STK25,SULT2B1,TAP1,TAP2,TAPBP,TD02,TD2,TERT,TIMP1,TLR2,TLR3,TM4SF1,TM7SF2,TMBIM6,TNC,TNFAI2,TNFRSF11B,TNNC1,TP53,TPBG,TPM1,TPX2,TRIM22,TTA3,TUBA1A,TYRO3,UAP1,UBE2L6,UBQLN2,VCAM1,VDR,VEGFA,VRK2,ZFP36,ZNF266</p> |
| OSM | cytokine | Activated | 6,761 | 6,818 | 0,004 | 7,97E-42 | 6,13E-39 | <p>A2M,ABCC1,ABCC3,ABCC5,ABCC8,ABCG1,ACAA1,ACE,ACSL5,ADAM17,ADAMTS1,ADH5,AFP,AHR,AKAP3,ALB,ALDH3B1,ANXA1,ANXA11,ANXA2,ANXA3,ANXA9,ARL4C,ASNS,ATF3,ATP2B4,ATP9A,B2M,BAIAP2,BBOX1,BHLHE40,BST1,C1R,C1S,CAP1,CASP4,CAT,CBX3,CCL20,CCL5,CCND1,CCND2,CCT2,CDA,CDH3,CDKN1B,CGA,CISH,CKM,CLEC2B,CLPP,CLPX,COL1A1,COL1A2,COL3A1,COX7B,CSST6,CTSV,CXADR,CXCL1,CXCL10,CXCL12,CYP1B1,DENND5A,DHR S3,DHX9,DNM1L,ECM2,EMP3,ERBB3,ETFB,EVPL,EXOSC10,F3,FLNA,FMO5,FN1,FOS,FOSB,FOSL1,GADD45G,GBP1,GBP2,GCA,GFFT1,GLUL,GPNMB,GRHPR,HIF1A,HIPK3,HLA-A,HLA-B,HLA-C,HLA-F,HMG20B,HMGN4,HSD11B2,HSF4,HSPA5,ICAM1,ID1,ID2,IFI35,IFNGR1,IGFBP6,IL13,IL13RA1,IL15,IL15RA,IL18,IL32,IL33,IL4R,IL6R,IL7,IRAK1,IRF1,IRF7,IRF9,ISG20,ITGA7,ITGAL,KLK1,KPNB1,KRT19,LCN2,LITAF,LRRFIP1,LSM4,MAOA,MARCKS,MCM7,MLLT11,MMP1,MP2,MMP9,MPDU1,MPZL2,MRC1,MT1X,MX1,MYD88,NAMPT,NEDD4L,NMT2,NOS2,NR113,NUAK1,OAS1,OGDH,OSMR,PAK2,PCNA,PCD4,PDZK1IP1,PEPD,PFKFB2,PFKFB3,PIGR,PKIG,PLA2G4A,PLCB4,PRDX2,PSMB8,PSMB9,PTEN,PTGES,PTOV1,PTP4A1,PYGL,QSOX1,RAB31,RARG,RBFOX2,RORA,RYK,S100A8,S100A9,SCNN1B,SERP, SERPINA3,SERPINB1,SERPING1,SLC16A3,SLC7A8,SLPI,SMPD1,SPP1,STAT1,STAT3,STK25,SULT2B1,TAP1,TAP2,TAPBP,TD02,TD2,TERT,TIMP1,TLR2,TLR3,TM4SF1,TM7SF2,TMBIM6,TNC,TNFAI2,TNFRSF11B,TNNC1,TP53,TPBG,TPM1,TPX2,TRIM22,TTA3,TUBA1A,TYRO3,UAP1,UBE2L6,UBQLN2,VCAM1,VDR,VEGFA,VRK2,ZFP36,ZNF266</p>                                                                                                                                                                                                                                                                                                                                                                                                                                                                                                                                                                                                                                                                                                                                                                                                                                                                                                                                                                                                                                                                                                                                                                                                                                                                                                                                                                                                                                                                                                                                                                                                                                                                                                                                                                                                                                                                                                         |

|       |       |                         |        |        |       |          |          |                                                                                                                                                                                                                                                                                                                                                                                                                                                                                                                                                                                                                                                                                                                                                                                                                                                                                                                                                                                                                                                                                                                                                                                                                                                                                                                                                                                                                                                                                                                                                                                                                                                                                                                                                                                                                                                                                                                                                                                                                                                                                                                                                                                                                                                                                                                                                                                                                                                                                                                                                                                                                                                                                                                                                                                                                                                                                                                                                                                                                                                                                                                                                                                                                                                                                                                                                                                                                                                                                                                                                                                                                                                                                                                                                                                                                                                                                                                                                                                                                                                                                                                                                                                                                                                                                                                                                                                                                                                                                                                                                                                                                                                                                                                                                                                                                                                                                                                                                                                                                                                                                                                                                                                                                                                                                                                                                                                                                                                                                                                                                                                                                                                                                                                                                                                                                                                                                                                                                                                                                                                                                                                                                                                                                                                                                                                                                                                                                                                                                                                                                                                                                                                                                                                                                                                                                                                                                                                                                                                                                                                                                                                                                                                                                                                                                                                                                                                                                                                                                                                                                                                                                                                                                                                                                                                                                                                                                                                                                                                                                                                                                                                                 |
|-------|-------|-------------------------|--------|--------|-------|----------|----------|---------------------------------------------------------------------------------------------------------------------------------------------------------------------------------------------------------------------------------------------------------------------------------------------------------------------------------------------------------------------------------------------------------------------------------------------------------------------------------------------------------------------------------------------------------------------------------------------------------------------------------------------------------------------------------------------------------------------------------------------------------------------------------------------------------------------------------------------------------------------------------------------------------------------------------------------------------------------------------------------------------------------------------------------------------------------------------------------------------------------------------------------------------------------------------------------------------------------------------------------------------------------------------------------------------------------------------------------------------------------------------------------------------------------------------------------------------------------------------------------------------------------------------------------------------------------------------------------------------------------------------------------------------------------------------------------------------------------------------------------------------------------------------------------------------------------------------------------------------------------------------------------------------------------------------------------------------------------------------------------------------------------------------------------------------------------------------------------------------------------------------------------------------------------------------------------------------------------------------------------------------------------------------------------------------------------------------------------------------------------------------------------------------------------------------------------------------------------------------------------------------------------------------------------------------------------------------------------------------------------------------------------------------------------------------------------------------------------------------------------------------------------------------------------------------------------------------------------------------------------------------------------------------------------------------------------------------------------------------------------------------------------------------------------------------------------------------------------------------------------------------------------------------------------------------------------------------------------------------------------------------------------------------------------------------------------------------------------------------------------------------------------------------------------------------------------------------------------------------------------------------------------------------------------------------------------------------------------------------------------------------------------------------------------------------------------------------------------------------------------------------------------------------------------------------------------------------------------------------------------------------------------------------------------------------------------------------------------------------------------------------------------------------------------------------------------------------------------------------------------------------------------------------------------------------------------------------------------------------------------------------------------------------------------------------------------------------------------------------------------------------------------------------------------------------------------------------------------------------------------------------------------------------------------------------------------------------------------------------------------------------------------------------------------------------------------------------------------------------------------------------------------------------------------------------------------------------------------------------------------------------------------------------------------------------------------------------------------------------------------------------------------------------------------------------------------------------------------------------------------------------------------------------------------------------------------------------------------------------------------------------------------------------------------------------------------------------------------------------------------------------------------------------------------------------------------------------------------------------------------------------------------------------------------------------------------------------------------------------------------------------------------------------------------------------------------------------------------------------------------------------------------------------------------------------------------------------------------------------------------------------------------------------------------------------------------------------------------------------------------------------------------------------------------------------------------------------------------------------------------------------------------------------------------------------------------------------------------------------------------------------------------------------------------------------------------------------------------------------------------------------------------------------------------------------------------------------------------------------------------------------------------------------------------------------------------------------------------------------------------------------------------------------------------------------------------------------------------------------------------------------------------------------------------------------------------------------------------------------------------------------------------------------------------------------------------------------------------------------------------------------------------------------------------------------------------------------------------------------------------------------------------------------------------------------------------------------------------------------------------------------------------------------------------------------------------------------------------------------------------------------------------------------------------------------------------------------------------------------------------------------------------------------------------------------------------------------------------------------------------------------------------------------------------------------------------------------------------------------------------------------------------------------------------------------------------------------------------------------------------------------------------------------------------------------------------------------------------------------------------------------------------------------------------------------------------------------------------------------------------------------|
| MYC   | 0,375 | transcription regulator | -1,575 | -1,518 | 0,003 | 2,07E-41 | 1,46E-38 | <p>ABCC1,ABCC3,ACACA,ACAT1,ACTB,ACTN1,ADAMTS1,ADIPOR1,ADM,AFP,AHCY,AK2,AKAP1,AKAP12,ALB,ALDH18A1,ALOX5,ANXA4,ANXA5,APOC3,AQP1,ARAF,ARF3,ARHGAP25,ASNS,ASS1,AXL,BAG1,BAX,BCKDHB,BCL2A1,BCL6,BIN1,BIRC2,BZW2,C1QBP,CAMK2N1,CAPN2,CASP1,CASP3,CASP8,CAST,CAV1,CCNA2,CCNB1,CCNB2,CCND1,CCND2,CCND3,CCT3,CD151,CD44,CD47,CD48,CD69,CD86,CD9,CDC25B,CDK1,CDKN1B,CDX2,CEBPE,CHP1,CHST15,CIDEA,CLIC4,CLPB,CLU,CLUH,COL15A1,COL1A1,COL1A2,COL3A1,COL4A1,COL4A2,COL5A1,COL5A2,COL6A3,COX5B,CPD,CPT2,CRI P1,CSE1L,CSF1R,CST6,CSTB,CTSB,CTSD,CTSV,CUL1,CXCL10,CXCL11,CXCL9,CYFIP2,DBN1,DCTPP1,DDB2,DDIT3,DEK,DLEU1,DNMT1,DNPH1,DROSHA,DUSP1,ECSIT,EED,EFEMP1,EIF3D,ENO1,ERAP1,EVPL,EVX1,EXOSC8,EXT2,EZH2,F3,FABP1,FABP2,FARP1,FAS,FBN1,FCGRT,FKBP5,FLNA,FN1,FOS,FOSL1,FRZB,FSTL1,FUT3,G6PC,GADD45A,GADD45B,GADD45G,GAMT,GBP2,GCLC,GCLM,GFPT1,GGH,GGTLC1,GJA1,GLS,GLUD1,GLUL,GLYR1,GM2A,GOT1,GOT2,GPC3,GPT,GRPEL1,GSR,HIF1A,HLA-A,HLA-B,HLA-E,HMOX2,HSD11B2,HSPA9,ICAM1,ID1,ID2,ID3,IDH1,IER5,IFI16,IFI27,IFI35,IFI44,IFI44L,IFI6,IFIH1,IFIT2,IFIT3,IFIT5,IFNA10,IMPA2,IQGAP2,IRF7,IRF9,ISG20,ITGA3,ITGAL,ITGAM,KLK1,KRAS,KRT7,LGALS1,LIMA1,LOC102724788/PRODH,LSM4,LUM,LXN,LYZ,MAD2L1,MAT2A,MCM5,MCM6,MCM7,ME2,MFAP1,MGP,MIF,MMP7,MMP9,MRC1,MSH2,MSN,MTHFD1,MX1,MX2,MYD88,MYO1B,NAP1L1,NCL,NDRG1,NDUFS4,NFE2L2,NGF,NIBAN1,NME1,NMI,NOCT,NPPA,NRP1,NUCB1,OAS1,OAT,OVOL1,PARP1,PCK1,PCNA,PDCD4,PDGFRA,PECAN1,PERP,PEX19,PFKFB3,PFKL,PFKP,PHB,PHF21A,PKLR,PKM,PLS3,PLSCR1,PMP22,POLR2G,PPARA,PPID,PPL,PRDX2,PRDX3,PRDX4,PRKACB,PRMT1,PROM1,PSAT1,PSMB8,PTEN,PTPRC,RAB40B,RARG,RARRES1,RARS1,RB1,RBBP7,RBP1,RHOA,RHOB,RIOX2,ROCK1,RPL23,RPL3,RPS16,RPS19,RPS20,RRM2,RSAD2,S100A10,S100A6,SAE1,SARDH,SDCBP,SEPHS2,SERINC3,SERPINE2,SFRP1,SFXN1,SGK1,SHMT1,SHMT2,SIRT2,SLC16A3,SLC16A7,SLC1A5,SLC22A4,SLC25A5,SLC2A2,SLC38A1,SLC3A2,SMAD1,SNRPD1,SNRPD2,SOD2,SP3,SPARC,SPP1,SQOR,ST3GAL1,ST3GAL4,STAT1,STAT3,STMN1,SUCLA2,TAGLN2,TERT,TES,TGFBR2,THBS2,THY1,TIAM1,TIMM23,TIMP1,TIMP2,TKT,TLE1,TLR7,TMSB10/TMSB4X,TNC,TNFSF10,TOB1,TP53,TPI1,TPP2,TRAP1,TRIM5,TRIP12,TSPAN7,TSP1,TSP2,TSN1,TXNIP,UBE2C,UBE2I,VCAM1,VEGFA,VEGFC,VIM,VLDLR,WNT8B,XPO1,YBX3,YRDC,YTHDC1,ZFP36</p>                                                                                                                                                                                                                                                                                                                                                                                                                                                                                                                                                                                                                                                                                                                                                                                                                                                                                                                                                                                                                                                                                                                                                                                                                                                                                                                                                                                                                                                                                                                                                                                                                                                                                                                                                                                                                                                                                                                                                                                                                                                                                                                                                                                                                                                                                                                                                                                                                                                                                                                                                                                                                                                                                                                                                                                                                                                                                                                                                                                                                                                                                                                                                                                                                                                                                                                                                                                                                                                                                                                                                                                                                                                                                                                                                                                                                                                                                                                                                                                                                                                                                                                                                                                                                                                                                                                                                                                                                                                                                                                                                                                                                                                                                                                                                                                                                                                                                                                                                                                                                                                                                                                                                                                                                                                                                                                                                                                                                                                                                                                                                                                                                                                                                                                                                                                                                                                                                                                                                                     |
| ERBB2 |       | kinase<br>Activated     | 2,530  | 2,591  | 0,005 | 2,09E-39 | 1,36E-36 | <p>ABCG2,ACAA2,ACTB,ADAM17,AGR2,AHNAK,ALAD,ANG,ANXA2,AURKA,BACE1,BARD1,BCKDHB,BHLHE40,BIRC3,BMP7,BNIP2,BNIP3,CAPZA2,CAVIN1,CAVIN3,CCL20,CCL5,CCNA2,CCNB1,CCNB2,CCND1,CCND2,CCND3,CD36,CD47,CD59,CD9,CDC14B,CDC25B,CD37L1,CDC42SE1,CDC7,CDCP1,CDH11,CDH3,CDK1,CDKN1B,CDKN2C,CDKN3,CHUK,CIDEA,CLDN3,CLU,COL18A1,COL1A1,COL3A1,COL4A1,COL5A1,COL5A2,COL6A3,CPT2,CRADD,CRIP1,CSE1L,CSF1R,CTSB,CUL1,CXCL10,CXCL12,CYP2J2,DDIT3,DDX10,DECR1,DERL1,DGAT1,DOK1,DPEP1,DSG2,EBP,EHF,EHHADH,EIF6,ELF2,ELL3,ELL2,EMP3,EPHX2,ERBB3,ESPL1,ESR1,ETFB,FEZ2,FGF7,FHIT, FN1,FOLR1,FOS,FOXO1,FSCN1,FSTL1,FZD4,GALNT3,GDPD3,GHR,GINS1,GINS2,GJA1,GLS,GNAI1,GPX3,GSTZ1,GZMH,HEPH,HIF1A,HMGB2,HSD17B11,HSPB8,HTRA1,ID1,ID2,IDH1,IDI1,IGFBP4,IGFBP6,IL6R,ITGA2,ITGB3,JAK1,JAM2,JCHAIN,KDM5B,KRT7,KRT81,LAMB1,LCN2,LGALS1,LITAF,LPCAT1,LRRFIP1,LTBP3,LUM,LXN,MACF1,MAF,MAOA,MAP2K3,MAPK13,MCCC1,MCM2,MCM3,MCM5,MCM6,MCM7,MFAP2,MFNG,MIF,MME,MMP1,MMP7,MMP9,MRC1,MUC1,MUC2,MUC3,MUC4,MUC5A,MUC5B,MUC6,MUC7,MUC8,MUC9,MUC10,MUC11,MUC12,MUC13,MUC14,MUC15,MUC16,MUC17,MUC18,MUC19,MUC20,MUC21,MUC22,MUC23,MUC24,MUC25,MUC26,MUC27,MUC28,MUC29,MUC30,MUC31,MUC32,MUC33,MUC34,MUC35,MUC36,MUC37,MUC38,MUC39,MUC40,MUC41,MUC42,MUC43,MUC44,MUC45,MUC46,MUC47,MUC48,MUC49,MUC50,MUC51,MUC52,MUC53,MUC54,MUC55,MUC56,MUC57,MUC58,MUC59,MUC60,MUC61,MUC62,MUC63,MUC64,MUC65,MUC66,MUC67,MUC68,MUC69,MUC70,MUC71,MUC72,MUC73,MUC74,MUC75,MUC76,MUC77,MUC78,MUC79,MUC80,MUC81,MUC82,MUC83,MUC84,MUC85,MUC86,MUC87,MUC88,MUC89,MUC90,MUC91,MUC92,MUC93,MUC94,MUC95,MUC96,MUC97,MUC98,MUC99,MUC100,MUC101,MUC102,MUC103,MUC104,MUC105,MUC106,MUC107,MUC108,MUC109,MUC110,MUC111,MUC112,MUC113,MUC114,MUC115,MUC116,MUC117,MUC118,MUC119,MUC120,MUC121,MUC122,MUC123,MUC124,MUC125,MUC126,MUC127,MUC128,MUC129,MUC130,MUC131,MUC132,MUC133,MUC134,MUC135,MUC136,MUC137,MUC138,MUC139,MUC140,MUC141,MUC142,MUC143,MUC144,MUC145,MUC146,MUC147,MUC148,MUC149,MUC150,MUC151,MUC152,MUC153,MUC154,MUC155,MUC156,MUC157,MUC158,MUC159,MUC160,MUC161,MUC162,MUC163,MUC164,MUC165,MUC166,MUC167,MUC168,MUC169,MUC170,MUC171,MUC172,MUC173,MUC174,MUC175,MUC176,MUC177,MUC178,MUC179,MUC180,MUC181,MUC182,MUC183,MUC184,MUC185,MUC186,MUC187,MUC188,MUC189,MUC190,MUC191,MUC192,MUC193,MUC194,MUC195,MUC196,MUC197,MUC198,MUC199,MUC200,MUC201,MUC202,MUC203,MUC204,MUC205,MUC206,MUC207,MUC208,MUC209,MUC210,MUC211,MUC212,MUC213,MUC214,MUC215,MUC216,MUC217,MUC218,MUC219,MUC220,MUC221,MUC222,MUC223,MUC224,MUC225,MUC226,MUC227,MUC228,MUC229,MUC230,MUC231,MUC232,MUC233,MUC234,MUC235,MUC236,MUC237,MUC238,MUC239,MUC240,MUC241,MUC242,MUC243,MUC244,MUC245,MUC246,MUC247,MUC248,MUC249,MUC250,MUC251,MUC252,MUC253,MUC254,MUC255,MUC256,MUC257,MUC258,MUC259,MUC260,MUC261,MUC262,MUC263,MUC264,MUC265,MUC266,MUC267,MUC268,MUC269,MUC270,MUC271,MUC272,MUC273,MUC274,MUC275,MUC276,MUC277,MUC278,MUC279,MUC280,MUC281,MUC282,MUC283,MUC284,MUC285,MUC286,MUC287,MUC288,MUC289,MUC290,MUC291,MUC292,MUC293,MUC294,MUC295,MUC296,MUC297,MUC298,MUC299,MUC300,MUC301,MUC302,MUC303,MUC304,MUC305,MUC306,MUC307,MUC308,MUC309,MUC310,MUC311,MUC312,MUC313,MUC314,MUC315,MUC316,MUC317,MUC318,MUC319,MUC320,MUC321,MUC322,MUC323,MUC324,MUC325,MUC326,MUC327,MUC328,MUC329,MUC330,MUC331,MUC332,MUC333,MUC334,MUC335,MUC336,MUC337,MUC338,MUC339,MUC340,MUC341,MUC342,MUC343,MUC344,MUC345,MUC346,MUC347,MUC348,MUC349,MUC350,MUC351,MUC352,MUC353,MUC354,MUC355,MUC356,MUC357,MUC358,MUC359,MUC360,MUC361,MUC362,MUC363,MUC364,MUC365,MUC366,MUC367,MUC368,MUC369,MUC370,MUC371,MUC372,MUC373,MUC374,MUC375,MUC376,MUC377,MUC378,MUC379,MUC380,MUC381,MUC382,MUC383,MUC384,MUC385,MUC386,MUC387,MUC388,MUC389,MUC390,MUC391,MUC392,MUC393,MUC394,MUC395,MUC396,MUC397,MUC398,MUC399,MUC400,MUC401,MUC402,MUC403,MUC404,MUC405,MUC406,MUC407,MUC408,MUC409,MUC410,MUC411,MUC412,MUC413,MUC414,MUC415,MUC416,MUC417,MUC418,MUC419,MUC420,MUC421,MUC422,MUC423,MUC424,MUC425,MUC426,MUC427,MUC428,MUC429,MUC430,MUC431,MUC432,MUC433,MUC434,MUC435,MUC436,MUC437,MUC438,MUC439,MUC440,MUC441,MUC442,MUC443,MUC444,MUC445,MUC446,MUC447,MUC448,MUC449,MUC450,MUC451,MUC452,MUC453,MUC454,MUC455,MUC456,MUC457,MUC458,MUC459,MUC460,MUC461,MUC462,MUC463,MUC464,MUC465,MUC466,MUC467,MUC468,MUC469,MUC470,MUC471,MUC472,MUC473,MUC474,MUC475,MUC476,MUC477,MUC478,MUC479,MUC480,MUC481,MUC482,MUC483,MUC484,MUC485,MUC486,MUC487,MUC488,MUC489,MUC490,MUC491,MUC492,MUC493,MUC494,MUC495,MUC496,MUC497,MUC498,MUC499,MUC500,MUC501,MUC502,MUC503,MUC504,MUC505,MUC506,MUC507,MUC508,MUC509,MUC510,MUC511,MUC512,MUC513,MUC514,MUC515,MUC516,MUC517,MUC518,MUC519,MUC520,MUC521,MUC522,MUC523,MUC524,MUC525,MUC526,MUC527,MUC528,MUC529,MUC530,MUC531,MUC532,MUC533,MUC534,MUC535,MUC536,MUC537,MUC538,MUC539,MUC540,MUC541,MUC542,MUC543,MUC544,MUC545,MUC546,MUC547,MUC548,MUC549,MUC550,MUC551,MUC552,MUC553,MUC554,MUC555,MUC556,MUC557,MUC558,MUC559,MUC560,MUC561,MUC562,MUC563,MUC564,MUC565,MUC566,MUC567,MUC568,MUC569,MUC570,MUC571,MUC572,MUC573,MUC574,MUC575,MUC576,MUC577,MUC578,MUC579,MUC580,MUC581,MUC582,MUC583,MUC584,MUC585,MUC586,MUC587,MUC588,MUC589,MUC590,MUC591,MUC592,MUC593,MUC594,MUC595,MUC596,MUC597,MUC598,MUC599,MUC600,MUC601,MUC602,MUC603,MUC604,MUC605,MUC606,MUC607,MUC608,MUC609,MUC610,MUC611,MUC612,MUC613,MUC614,MUC615,MUC616,MUC617,MUC618,MUC619,MUC620,MUC621,MUC622,MUC623,MUC624,MUC625,MUC626,MUC627,MUC628,MUC629,MUC630,MUC631,MUC632,MUC633,MUC634,MUC635,MUC636,MUC637,MUC638,MUC639,MUC640,MUC641,MUC642,MUC643,MUC644,MUC645,MUC646,MUC647,MUC648,MUC649,MUC650,MUC651,MUC652,MUC653,MUC654,MUC655,MUC656,MUC657,MUC658,MUC659,MUC660,MUC661,MUC662,MUC663,MUC664,MUC665,MUC666,MUC667,MUC668,MUC669,MUC670,MUC671,MUC672,MUC673,MUC674,MUC675,MUC676,MUC677,MUC678,MUC679,MUC680,MUC681,MUC682,MUC683,MUC684,MUC685,MUC686,MUC687,MUC688,MUC689,MUC690,MUC691,MUC692,MUC693,MUC694,MUC695,MUC696,MUC697,MUC698,MUC699,MUC700,MUC701,MUC702,MUC703,MUC704,MUC705,MUC706,MUC707,MUC708,MUC709,MUC710,MUC711,MUC712,MUC713,MUC714,MUC715,MUC716,MUC717,MUC718,MUC719,MUC720,MUC721,MUC722,MUC723,MUC724,MUC725,MUC726,MUC727,MUC728,MUC729,MUC730,MUC731,MUC732,MUC733,MUC734,MUC735,MUC736,MUC737,MUC738,MUC739,MUC740,MUC741,MUC742,MUC743,MUC744,MUC745,MUC746,MUC747,MUC748,MUC749,MUC750,MUC751,MUC752,MUC753,MUC754,MUC755,MUC756,MUC757,MUC758,MUC759,MUC760,MUC761,MUC762,MUC763,MUC764,MUC765,MUC766,MUC767,MUC768,MUC769,MUC770,MUC771,MUC772,MUC773,MUC774,MUC775,MUC776,MUC777,MUC778,MUC779,MUC780,MUC781,MUC782,MUC783,MUC784,MUC785,MUC786,MUC787,MUC788,MUC789,MUC790,MUC791,MUC792,MUC793,MUC794,MUC795,MUC796,MUC797,MUC798,MUC799,MUC800,MUC801,MUC802,MUC803,MUC804,MUC805,MUC806,MUC807,MUC808,MUC809,MUC810,MUC811,MUC812,MUC813,MUC814,MUC815,MUC816,MUC817,MUC818,MUC819,MUC820,MUC821,MUC822,MUC823,MUC824,MUC825,MUC826,MUC827,MUC828,MUC829,MUC830,MUC831,MUC832,MUC833,MUC834,MUC835,MUC836,MUC837,MUC838,MUC839,MUC840,MUC841,MUC842,MUC843,MUC844,MUC845,MUC846,MUC847,MUC848,MUC849,MUC850,MUC851,MUC852,MUC853,MUC854,MUC855,MUC856,MUC857,MUC858,MUC859,MUC860,MUC861,MUC862,MUC863,MUC864,MUC865,MUC866,MUC867,MUC868,MUC869,MUC870,MUC871,MUC872,MUC873,MUC874,MUC875,MUC876,MUC877,MUC878,MUC879,MUC880,MUC881,MUC882,MUC883,MUC884,MUC885,MUC886,MUC887,MUC888,MUC889,MUC890,MUC891,MUC892,MUC893,MUC894,MUC895,MUC896,MUC897,MUC898,MUC899,MUC900,MUC901,MUC902,MUC903,MUC904,MUC905,MUC906,MUC907,MUC908,MUC909,MUC910,MUC911,MUC912,MUC913,MUC914,MUC915,MUC916,MUC917,MUC918,MUC919,MUC920,MUC921,MUC922,MUC923,MUC924,MUC925,MUC926,MUC927,MUC928,MUC929,MUC930,MUC931,MUC932,MUC933,MUC934,MUC935,MUC936,MUC937,MUC938,MUC939,MUC940,MUC941,MUC942,MUC943,MUC944,MUC945,MUC946,MUC947,MUC948,MUC949,MUC950,MUC951,MUC952,MUC953,MUC954,MUC955,MUC956,MUC957,MUC958,MUC959,MUC960,MUC961,MUC962,MUC963,MUC964,MUC965,MUC966,MUC967,MUC968,MUC969,MUC970,MUC971,MUC972,MUC973,MUC974,MUC975,MUC976,MUC977,MUC978,MUC979,MUC980,MUC981,MUC982,MUC983,MUC984,MUC985,MUC986,MUC987,MUC988,MUC989,MUC990,MUC991,MUC992,MUC993,MUC994,MUC995,MUC996,MUC997,MUC998,MUC999,MUC1000</p> |

|              |        |                                   |           |        |        |       |          |          |                                                                                                                                                                                                                                                                                                                                                                                                                                                                                                                                                                                                                                                                                                                                                                                                                                                                                                                                                                                                                                                                                                                                                                                                                                                                                                                                                                                                                                                                                                                                                                                                                                                                                                                                                                                                                                                                                                                                                                                                                                                                                                                                                                                                                                                                                                                                                                                                                                                                                                                                                                                                                                                                                                                                                                                                                                                                                                                                                                                                                                                                                                                                                                                                                                                                                                                                                                                                                                                                                                                                                                                                                                                                                                                        |
|--------------|--------|-----------------------------------|-----------|--------|--------|-------|----------|----------|------------------------------------------------------------------------------------------------------------------------------------------------------------------------------------------------------------------------------------------------------------------------------------------------------------------------------------------------------------------------------------------------------------------------------------------------------------------------------------------------------------------------------------------------------------------------------------------------------------------------------------------------------------------------------------------------------------------------------------------------------------------------------------------------------------------------------------------------------------------------------------------------------------------------------------------------------------------------------------------------------------------------------------------------------------------------------------------------------------------------------------------------------------------------------------------------------------------------------------------------------------------------------------------------------------------------------------------------------------------------------------------------------------------------------------------------------------------------------------------------------------------------------------------------------------------------------------------------------------------------------------------------------------------------------------------------------------------------------------------------------------------------------------------------------------------------------------------------------------------------------------------------------------------------------------------------------------------------------------------------------------------------------------------------------------------------------------------------------------------------------------------------------------------------------------------------------------------------------------------------------------------------------------------------------------------------------------------------------------------------------------------------------------------------------------------------------------------------------------------------------------------------------------------------------------------------------------------------------------------------------------------------------------------------------------------------------------------------------------------------------------------------------------------------------------------------------------------------------------------------------------------------------------------------------------------------------------------------------------------------------------------------------------------------------------------------------------------------------------------------------------------------------------------------------------------------------------------------------------------------------------------------------------------------------------------------------------------------------------------------------------------------------------------------------------------------------------------------------------------------------------------------------------------------------------------------------------------------------------------------------------------------------------------------------------------------------------------------|
| ESR1         | -0,197 | ligand-dependent nuclear receptor | Activated | 2,337  | 2,361  | 0,001 | 1,50E-38 | 9,04E-36 | <p>AASS,ABCC3,ABCC5,ABCG2,ACE,ACKR3,ACOX1,ACSL1,ACTR2,ADA,ADAM17,ADD3,AHNAK,AKAP1,ALOX5,ANXA3,ANXA4,APOA1,APOE,AQP1,AQP3,ARAF,ARFIP2,ARHGFE9,ASS1,ATF3,ATP6V0D1,AURKA,AVP,BAG1,BAX,BCAS3,BCCIP,BCL2L2,BCL6,BCLAF1,BIN1,BIRC3,C3,CA2,CALB1,CALML4,CAP2,CAPN2,CASP6,CASP8AP2,CAV1,CAV2,CCL20,CCN3,CCNA2,CCNB1,CCND1,CCND3,CCNG1,CNH,CD55,CD59,CD69,CD83,CDC42SE1,CDK1,CDK5,CDKN1B,CDKN1C,CDKN3,CELSR2,CENPM,CENPU,CEP135,CGA,CHFR,CLCN3,CLDN1,CLEC7A,CLTCL1,COL16A1,COL5A2,COMT,COTL1,CPE,CRADD,CSNK1A1,CTNS,CTSB,CTSD,CTSS,CXADR,CXCL1,CXCL12,CYFIP1,CYFIP2,CYP17A1,CYP1B1,CYP4A11,DAB2,DD2,DECR1,DHCR7,DLG5,DMTN,DSG2,DUSP9,DYRK2,EFEMP1,EFNB2,EGF,ENAH,ENO1,ENPP2,ERBB3,ERGIC2,ESR1,ESRRA,F12,F2RL1,F3,FABP1,FAM102A,FAS,FHL1,FIS1,FKBP4,FLNA,FOLR1,FOS,FOSB,FOSL1,FOXO1,FOXO4,FRAT2,FZD2,GADD45B,GALNT7,GGA2,GHR,GJA1,GJB1,GLB1,GLRX,GM2A,GNAS,GNB1,GPER1,GPSM2,GUCY1A1,GUCY1B1,HACD1,HAX1,HCP5,HIF1A,HIP1R,HLA-B,HLA-C,HLA-E,HLA-G,HLA-J,HMGCS2,HOMER3,HOOK2,HPGDS,HSD3B2,HSP90B1,HTRA1,HYAL1,ICAM1,ID1,IFI27,IFI44,IFI44L,IFI6,IFITM1,IFITM2,IFRD1,IGFBP4,IMPDH2,INSR,IQGAP1,IRF1,ISG20,ITGB1BP1,JAK1,JUND,KIF20A,KLHL20,KPNB1,KRAS,KRT19,KRT7,LAMB1,LAPTM5,LCK,LCN1,LCN2,LEMD3,LEPR,LGALS1,LGALS3BP,LHB,LIMA1,LTB,LTG,LYPD1,MAD2L1,MAP3K1,MAP3K12,MAP3K13,MAP7,MAPK12,MAPK8,MAPT,MARCKS,MAST2,MCF2L,METTL7A,MMD,MME,MMP1,MMP9,MPCN1,MPDZ,MR1,MX1,MYB,NCF2,NEDD9,NFKB1,NFKBIE,NFYB,NIPSNAP1,NLGN4X,NME1,NOS2,NPR3,NR0B2,NR1H2,NR1H3,NUCB1,NUP214,OIP5,OPA1,OSTF1,OXT,PAK2,PALLD,PBK,PCBD1,PCGF2,PCNA,PCYOX1,PDCD4,PDCD5,PDK4,PGRMC2,PHB,PIBF1,PLA2G4C,PLCE1,PLIN2,PLOD2,PLS1,POR,PPARGC1A,PPP1R12A,PPP1R3C,PPP6R2,PRKACB,PRKCD,PRKCH,PRKCI,PRKD3,PRKX,PRLR,PROM1,PSAT1,PSIP1,PTEN,PTGER3,PTP4A2,PTPRT,PTTG1,PTTG1IP,PYGL,RAB27A,RAB31,RAB5C,RAI2,RAPGEF6,RB1,RBM22,RDX,RENBP,RGS19,RND3,ROBO1,ROCK1,RORC,RSAD2,RTP4,S100A9,SAMD9,SAMHD1,SCD,SCNN1B,SEC31A,SELL,SEMA3B,SERPINB9,SFXN3,SGK1,SHANK2,SIGIRR,SIPA1L1,SLC16A3,SLC25A36,SLC26A2,SLC2A4RG,SLC39A4,SLC3A2,SLC7A8,SLC9A3,SLC9A3R1,SMAD2,SMC3,SMC4,SMPD1,SNN,SOCS2,SOX4,SP110,SPAG9,SPP1,SPTL2,SRPRK2,STAT1,STAT3,STC2,SUCLA2,SULT1C2,TAPBP,TCIRG1,TD02,TEAD4,TERT,TESK1,TFF3,THBS4,THRB,TIMM17B,TIMP2,TJP1,TM4SF1,TMED10,TMSB15A,TNFAIP2,TNFAIP6,TNFRSF11B,TNFSF10,TOB1,TP53,TP53BP1,TPD52L1,TPM1,TPP2,TRAM1,TRIB3,TSKU,TSPO,TSPYL2,TTK,TXNIP,TYK2,UBE2I,UBL3,VEGFA,VEGFC,VEZF1,VIM,VPS26C,VPS35,VRK2,WARS1,WASF2,WNK1,WTAP,XBABCG2,ACAT1,ACE,ACOT7,ACOX1,ACP5,ACSL1,ACTB,ADAMDEC1,ADAMTS1,ADH5,ADM,ADRA2A,ADRB2,AEBP1,ALPL,ANKH,APOE,AQP1,ATF3,ATP6V1B2,AURKA,BAX,BCL6,BHLHE40,BIRC3,C3,CA2,CASP3,CAV1,CCNA2,CCNB1,CCNB2,CCND1,CCND3,CCNG1,CCR2,CCR5,CD1D,CD36,CD40,CD86,CDH11,CDKN1B,CFB,CFD,CIDE C,CLDN3,COL15A1,COMT,CTSF,CTSV,CXCL10,CXCL11,CXCL12,CXCR4,CYP1B1,CYP2A6 (includes others),CYP2B6,CYP2C8,CYP3A4,DDIT3,DICER1,DPP4,EGF,EIF5B,ELL2,ENC1,ENG,ENPEP,ENPP2,ESPL1,ESR1,F2RL1,F3,FAAH,FAM49A,FKBP3,FKBP4,FKBP5,FMO5,FN1,FOS,FOXO1,FRAT2,GABARA,PL1,GAD1,GARS1,GCH1,GHR,GJA1,GNMT,GRB10,GRINA,GSTA3,HIF1A,HLA-DQB1,HLA-G,HOPX,HOXA10,HSD11B2,HSPA8,ICAM1,ID1,ID3,IHH,IL13,IL15,IL6R,INHA,INSR,ISG20,ITGA2,JAM2,KLF9,KLK1,KRT7,LCN2,LEPR,LEP,ROT,LGALS1,LHB,LITAF,LPIN1,LTG,LXN,MAD2L1,MAOA,MAP2K3,MCM2,MCM3,MCM5,MCM6,MCM7,ME1,MME,MMP1,MMP2,MMP7,MM P9,MRC1,MUC1,MYB,MYD88,NDRG1,NEDD9,NET1,NFIL3,NOP16,NOS2,NPL,NPY1R,NR1H3,NR4A1,NRP1,NSUN5,OXT,PARM1,PBX3,PCDH1,PCK1,PCNA,PDK3,PDLIM1,PDXDC1,PDZK1IP1,PFKFB3,PGRMC1,PHF21A,PIGR,PKM,PLA2G7,PLK2,PMP22,POSTN,PRLR,PRNP,PTGER3,PTGS1,RAB11FIP5,RASSF2,RBP1,RRM2,S100A6,SCD,SCNN1B,SFN,SGK1,SLC1A5,SLC31A2,SMAD2,SMPDL3A,SOD2,SP P1,SPSB1,SRSF7,ST3GAL1,ST3GAL4,STAT1,STAT3,STX18,TACSD2,TBX2,TD02,TERT,TGFB1,TGFB3,TIAM1,TIMP1,TIPARP,TNFRS F21,TNFSF10,TP53,TRAF5,UGCG,VDR,VEGFA,VIM,WFDC2</p> |
| progesterone |        | chemical - endogenous mammalian   |           | -1,082 | -1,049 | 0,002 | 5,90E-34 | 3,12E-31 |                                                                                                                                                                                                                                                                                                                                                                                                                                                                                                                                                                                                                                                                                                                                                                                                                                                                                                                                                                                                                                                                                                                                                                                                                                                                                                                                                                                                                                                                                                                                                                                                                                                                                                                                                                                                                                                                                                                                                                                                                                                                                                                                                                                                                                                                                                                                                                                                                                                                                                                                                                                                                                                                                                                                                                                                                                                                                                                                                                                                                                                                                                                                                                                                                                                                                                                                                                                                                                                                                                                                                                                                                                                                                                                        |

|                  |        |           |           |       |       |          |          |                                                                                                                                                                                                                                                                                                                                                                                                                                                                                                                                                                                                                                                                                                                                                                                                                                                                                                                                                                                                                                                               |                                                                                                                                                                                                                                                                                                                                                                                                                                                                                                                                                                                                                                                                                                                                                                                                                                                                                                                                                                                                                                                                                                                                                                                                                                                                                                                                                                                                                                                                             |
|------------------|--------|-----------|-----------|-------|-------|----------|----------|---------------------------------------------------------------------------------------------------------------------------------------------------------------------------------------------------------------------------------------------------------------------------------------------------------------------------------------------------------------------------------------------------------------------------------------------------------------------------------------------------------------------------------------------------------------------------------------------------------------------------------------------------------------------------------------------------------------------------------------------------------------------------------------------------------------------------------------------------------------------------------------------------------------------------------------------------------------------------------------------------------------------------------------------------------------|-----------------------------------------------------------------------------------------------------------------------------------------------------------------------------------------------------------------------------------------------------------------------------------------------------------------------------------------------------------------------------------------------------------------------------------------------------------------------------------------------------------------------------------------------------------------------------------------------------------------------------------------------------------------------------------------------------------------------------------------------------------------------------------------------------------------------------------------------------------------------------------------------------------------------------------------------------------------------------------------------------------------------------------------------------------------------------------------------------------------------------------------------------------------------------------------------------------------------------------------------------------------------------------------------------------------------------------------------------------------------------------------------------------------------------------------------------------------------------|
| Interferon alpha | group  | Activated | 9,087     | 9,160 | 0,006 | 3,03E-32 | 1,35E-29 | ADA2,ADAR,AFP,AIM2,ANXA5,APOBEC3A,APOBEC3B,APOBEC3F,APOBEC3G,APOL1,APOL3,AQP3,ASCC2,ATF3,AXL,B2M,BCL2A1,BCL2L13,BCL6,BST2,C3,C3AR1,CASP1,CASP3,CASP8,CCL19,CCL5,CCND1,CCND2,CCND3,CCR5,CCR7,CD1D,CD38,CD40,CD69,CD81,CD83,CD86,CD8A,CDKN1B,CISH,CLTCL1,CSF2RB,CTH,CXCL1,CXCL10,CXCL11,CXCL9,CYP3A4,DDX58,DEFB1,DYNLT1,ENPP2,F3,FAS,FCER1A,FCGR2B,FOS,GBP1,GBP2,GIMAP4,GLS,GZMB,GZMH,HERC6,HLA-A,HLA-B,HLA-C,HLA-F,HLA-G,ICAM1,IDO1,IFI16,IFI27,IFI35,IFI44,IFI44L,IFI6,IFIH1,IFIT2,IFIT3,IFITM1,IFITM2,IFNAR2,IGFBP4,IL10RA,IL13,IL15,IL15RA,IL1R1,IL32,IL4R,IL6R,IL7,IL7R,INSR,IRF1,IRF7,IRF8,IRF9,ISG15,ISG20,ITGAM,JAK1,LAMP3,LCK,MNDA,MX1,MX2,MYD88,MYLIP,NFIL3,NKG7,NMI,NO2,S2,OAS1,OAS2,OAS3,PARP12,PHF11,PLAAT4,PLSCR1,PRF1,PSMB8,PSMB9,PTGES,RB1,RBX1,RNASEL,RSAD2,RSPH14,RTMP4,S100A9,SAMD9,SERPINB1,SERPINB9,SIGLEC1,SLC1A5,SLC2A11,SOC2,SP110,SPRY1,SPRY2,STAT1,STAT3,STAT4,TAP1,TAP2,TAPBP,TDRD7,TENT4A,TERT,TLR1,TLR2,TLR3,TLR4,TLR7,TLR8,TMEM140,TNFSF10,TOBP1,TRANK1,TRIL,TRIM21,TRIM22,TRIM5,TRIOBP,UBA7,UBE2C,VCAM1,WARS1,XBP1,XPNPEP2,XRCC5 |                                                                                                                                                                                                                                                                                                                                                                                                                                                                                                                                                                                                                                                                                                                                                                                                                                                                                                                                                                                                                                                                                                                                                                                                                                                                                                                                                                                                                                                                             |
| IL6              | -0,135 | cytokine  | Activated | 3,486 | 3,556 | 0,005    | 1,05E-31 | 4,44E-29                                                                                                                                                                                                                                                                                                                                                                                                                                                                                                                                                                                                                                                                                                                                                                                                                                                                                                                                                                                                                                                      | A2M,ABCC1,ABCC2,ABCC3,ABCC5,ABCG2,ACOX1,ADAMTS1,ADGRE5,ADGRL2,ADM,AFP,AHNAK,AHR,ALB,ANG,ANXA1,APOA1,APOE,ARL4C,ATF3,AVP,BAX,BCL6,BST2,C1QL1,C3,CAPRIN1,CASP1,CASP3,CASP4,CCL20,CCL5,CCNA2,CCNB1,CCNB2,CCND1,CCR2,CCR5,CCR7,CD14,CD163,CD36,CD38,CD40,CD44,CD48,CD53,CD74,CD83,CD86,CDK1,CDKN1B,CDKN3,CDX2,CES2,CFD,CFH,CIB2,CISH,CLEC10A,CLU,COL1A1,COL3A1,CSF1R,CSF2RB,CTSK,CX3CR1,CXCL1,CXCL10,CXCL6,CXCR4,CYBB,CYP1B1,CYP2B6,CYP2C8,CYP3A4,CYTIP,DCN,DIO1,DNMT1,DUSP1,DVL1,ENPP2,EZH2,F12,F3,FAH,FAS,FCGRT,FLI1,FN1,FOS,FOSL1,FSCN1,G6PC,GADD45A,GADD45B,GADD45G,GALE,GBP2,GCH1,GINS1,GLRX,GRK2,GSTA1,GZMB,HIF1A,HLA-A,HLA-DMA,HLA-DQA1,HOMER3,HPGD,HSPA5,ICAM1,ID1,ID2,IDO1,IFI16,IFIT2,IGFBP4,IGFBP6,IGHM,IK,IL13,IL15,IL1R1,IL4R,IL6R,IL7,IL7R,IRF1,IRF9,ITGAM,ITGAV,ITGB3,JAK1,JCHAIN,JUND,KIF22,KLRB1,KLRD1,LCN2,LGALS1,LTF,LY86,LY96,LYZ,MACROD1,MAD2L1,MAF,MCM3,MET,MIA2,MMD,MMP1,MMP2,MMP7,MMP9,MRAS,MTOR,MTTP,MUC1,MYB,MYD88,NAMPT,NCF2,NFKB1,NGF,NOS2,NUCB2,OIP5,OSBPL1A,PCLAF,PCNA,PECAM1,PHB,PLG,PLK2,PPP1R15A,PRF1,PRNP,PTG1,PSMB10,PSMB8,PSMB9,PSME1,PTGES,PTPRC,PTTG1,RAB27A,RB1,REG1A,RNASE6,RORA,RORC,RRM2,S100A9,SC5D,SENP2,SERPINA3,SGK1,SH3GLB1,SLC12A2,SLC2A2,SLC39A14,SLC5A2,SLC7A7,SMAD7,SNX10,SOCS2,SOD2,SP110,SPP1,SST,STAT1,STAT3,STAT4,STEAP4,STS,TAC1,TAP1,TBC1D9,TBXAS1,TERT,TIMP1,TLR1,TLR2,TLR3,TLR4,TLR5,TLR7,TLR8,TNC,TNFRSF11B,TNFRSF17,TNFRSF1B,TNFSF10,TP53,TP53,TTK,TYK2,UBE2C,VCAM1,VEGFA,VIM,VLDLR,VTCN1,WARS1,XBP1,XPNPEP2,XRCC5 |
| IFNA2            |        | cytokine  | Activated | 7,235 | 7,313 | 0,008    | 2,43E-31 | 9,77E-29                                                                                                                                                                                                                                                                                                                                                                                                                                                                                                                                                                                                                                                                                                                                                                                                                                                                                                                                                                                                                                                      | ADAM17,ALOX5,ANXA1,ARL5A,B2M,BAG3,BAX,BST2,C1R,C1S,CAV1,CBFB,CCL5,CCL8,CD69,CD86,CDKN1B,CISH,CXCL10,CXCL11,CXCL9,CYB5A,DDX56,DDX58,DDX60,DPP4,EPB41L3,FAS,GBP1,GBP2,GNAS,GOT1,HERC6,HIF1A,HLA-A,HLA-B,HLA-C,HLA-E,IDO1,IFI16,IFI27,IFI35,IFI44,IFI44L,IFI6,IFIH1,IFIT2,IFIT3,IFIT5,IFITM1,IFITM2,IFNAR2,IL10RB,IL2RB,IRF1,IRF7,IRF9,ISG15,ISG20,LAMP3,LAPTM4B,LGALS3BP,LILRB2,LPAR6,LYN,MAL,MET,MMP9,MT1F,MT1G,MT1X,MX1,MX2,NPDC1,OAS1,OAS2,OAS3,PARP12,PHF11,PLAAT4,PLSCR1,PSME1,PTTG1,RB1,RIPOR2,RSAD2,SAMD9,SAMHD1,SAMSN1,SDC1,SERPINB9,SH2D1A,SLC15A3,SOCS2,SP110,STAT1,STAT4,TAP1,TDRD7,THEMIS2,TLR3,TNFRSF10D,TNFSF10,TP53,TRIM21,TRIM22,UBA7,UBD,UBE2L6,VCAM1,VEGFA,VEGFC,XAF1,XRP1                                                                                                                                                                                                                                                                                                                                                                                                                                                                                                                                                                                                                                                                                                                                                                                  |

|        |       |          |           |        |        |       |          |          |                                                                                                                                                                                                                                                                                                                                                                                                                                                                                                                                                                                                                                                                                                                                                                                                                                                                                                                                                                                                                                                                                                                                                                                                                                                                                                                                                                                                                                                                                                                                                                                                                                 |
|--------|-------|----------|-----------|--------|--------|-------|----------|----------|---------------------------------------------------------------------------------------------------------------------------------------------------------------------------------------------------------------------------------------------------------------------------------------------------------------------------------------------------------------------------------------------------------------------------------------------------------------------------------------------------------------------------------------------------------------------------------------------------------------------------------------------------------------------------------------------------------------------------------------------------------------------------------------------------------------------------------------------------------------------------------------------------------------------------------------------------------------------------------------------------------------------------------------------------------------------------------------------------------------------------------------------------------------------------------------------------------------------------------------------------------------------------------------------------------------------------------------------------------------------------------------------------------------------------------------------------------------------------------------------------------------------------------------------------------------------------------------------------------------------------------|
| CD40LG | 0,101 | cytokine | Activated | 2,918  | 2,996  | 0,008 | 8,06E-28 | 2,72E-25 | ADAM17,AHR,APOBEC3G,APRT,ARID4B,ARSB,ASCC3,ATF3,AUH,AXL,B2M,BAX,BCL2A1,BCL6,BIRC2,BIRC3,BNIP3,CA2,CASP1,CAS T,CBX3,CCL18,CCL19,CCL20,CCL5,CCND3,CCNG1,CCR2,CCR5,CCR7,CD1C,CD1D,CD27,CD38,CD40,CD44,CD63,CD69,CD83,CD86,CD8A,CDC25B,CDKN1B,CELF2,CLU,CLUH,CXCL1,CXCL10,CXCR4,CYP1B1,CYTIP,DECR1,DUSP1,F3,FAS,FCGR2B,FOS,FOSB,FSCN1,G0S2,GADD45A,GATB,GCH1,GPR183,GZMB,HDCC2,HIF1A,HLA-DQA1,HLA-DQB1,ICAM1,ID2,ID3,IDO1,IFI44,IFI6,IFIT2,IFIT3,IFITM1,IL10RA,IL13RA1,IL15,IL2RB,IL4R,IL7R,IRF1,IRF2,ISG15,ITGAM,ITPA,JUND,KIF2A,LAMP3,LMAN2,LTB,MAP2K3,MARCKS,MARCKSL1,MIF,MSH2,MT1G,MX1,NAMPT,NAP1L1,NET1,NFKB1,NFKBIE,NOS2,NR4A3,PLA2G4C,PLEK,PMVK,PSMB10,PSMB8,PSMB9,PSME1,PSMG1,PTPN12,RASSF2,RB1,RIDA,RUNX3,SAMSN1,SELL,SELP,SEMA4D,SLC29A1,SNX4,SOD2,SPHK2,STAT1,STAT3,STAT4,SWAP70,TAP1,TAP2,TM7SF2,TNFAIP2,TNFAIP6,TNFRSF11B,TNFRSF17,TNFSF10,TP53,TRAF5,TREM2,TUBB,UBD,VCAM1,VEGFA,XPO7,XRCC5,YBX3,ZZZ                                                                                                                                                                                                                                                                                                                                                                                                                                                                                                                                                                                                                                                                                                                   |
| IL1B   | 0,211 | cytokine | Activated | 6,036  | 6,093  | 0,004 | 1,67E-27 | 5,28E-25 | A2M,ABCC2,ABCC3,ABCG2,ADAMTS1,ADM,ADRB2,AKR1B1,ALDH7A1,ALPL,ANKH,ANXA1,ANXA9,APOE,ARC,ARL6IP5,ASS1,ATF3,AVP,B2M,BACE1,BAX,BCL2A1,BCL6,BIRC2,BIRC3,C1R,C3,CALB1,CASP3,CASP4,CAT,CCL20,CCL5,CCL8,CCR2,CCR5,CCR7,CD14,CD40,CD44,CD55,CD69,CD74,CD83,CD86,CFB,CISH,COL1A1,CSF2RB,CTSB,CTSF,CTSS,CTSZ,CX3CR1,CXCL1,CXCL10,CXCL11,CXCL12,CXCL6,CXCL9,CXCR4,CYBA,CYBB,CYP27B1,CYP2B6,CYP3A4,CYTIP,DAB2,DCN,DDIT3,DIO1,DNMT1,DPP4,DUSP1,EGOT,EHF,ENGG,ENPP2,ESR1,ESRRA,F2RL1,F3,FABP1,FAS,FCGR2B,FGF7,FGFR3,FKBP5,FN1,FOS,FOSB,FOSL1,FOXO1,G0S2,GAD1,GADD45A,GADD45B,GBP1,GBP2,GCH1,GCHFR,GCLC,GHR,GJA1,GM2A,GNAS,GRN,GSTA1,GYS1,H1-10,HDAC1,HEXB,HIF1A,HLA-A,HLA-DRA,HLA-E,HNF1B,HNF4A,HPGDS,HPRT1,HSPA5,ICAM1,ID3,IDO1,IFI16,IFIT3,IFNGR1,IFRD1,IGFBP4,IGFBP6,IL10RA,IL15,IL15RA,IL18,IL1R1,IL32,IL33,IL36A,IL6R,IL7,INSR,IRAK1,IRF1,IRF7,ISG15,ISG20,ITGAM,ITGAV,ITGB3,ITGB8,JUND,KLRB1,KRT19,LCN2,LCP1,LHB,LY96,MAPT,MARCKSL1,MEF2C,MFAP2,MIF,MMP1,MMP2,MMP7,MMP9,MUC1,MX1,MYD88,NAMPT,NFE2L2,NFIL3,NFKB1,NFYB,NGF,NIBAN1,NMI,NOCT,NOS2,NPPA,NROB2,NR1H3,NR1I3,NR4A1,NR4A3,NRP1,OAS2,OSMR,P4HB,PAPPA,PCNA,PDGFRA,PFKP,PIGR,PLA2G4A,PLD1,PLSCR1,POSTN,PPARA,PPARGC1A,PRKCD,PSMB10,PSMB8,PSMB9,PTGES,PTGS1,PTP4A1,RAC2,RCAN1,RHOB,RNASE1,RORA,RORC,RSAD2,RXRA,S100A10,S100A6,S100A8,S100A9,SCN1B,SDC1,SERPINA3,SERPINB9,SERPINF2,SGPL1,SIRT3,SLC10A2,SLC1A3,SLC22A4,SLC2A2,SLC2A9,SLC37A4,SLC5A2,SLC9A3,SMAD7,SOCS2,SOD2,SPARC,SPP1,SRGN,SSTR2,STAT1,STAT3,STAT4,TAC1,TAP2,TBP,TFPI2,TGFBR2,THY1,TIMP1,TIMP2,TJP1,TLR2,TLR3,TLR4,TLR7,TLR8,TNFAIP2,TNFAIP6,TNFRSF11B,TNFRSF1B,TNFSF10,TOB1,TREM2,TXNIP,UAP1,UBD,UBE2L6,UGCG,VCAM1,VCA |
| MAPK1  | 0,203 | kinase   | Inhibited | -6,175 | -6,173 | 0,000 | 4,57E-27 | 1,38E-24 | ACO1,ADAM17,ADAR,APBB3,APOE,ARC,ARG2,ARSB,ATF3,AURKA,BCL11A,BST2,BTN3A3,C1S,CAPN2,CAV1,CCL5,CCNB1,CCND1,CD69,CD84,CDKN1B,CFB,CGA,CISH,CPED1,CRYL1,CSTA,CTSB,CXCL11,DAB2,DDX58,DNMT1,DSE,DUSP1,EHD1,ENO3,ERAP1,ESR1,EXOC2,FCMR,FHL2,FN1,FOS,FOSB,GBP1,GBP2,GDPD3,GLS,GRAMD1B,HBB,HLA-B,HLA-C,HLA-DMA,HLA-E,IFI16,IFI27,IFI35,IFI44,IFI6,IFIH1,IFIT2,IFIT3,IFIT5,IFITM1,IGFBP7,IL13,IRF7,IRF9,ISG15,ISG20,ITGAV,ITGB3,JUND,LAMP3,LGALS1,LGALS3BP,LHB,MAOB,MAPK13,MAST3,MMP1,MMP2,MMP9,MNS1,MX2,NFE2L2,NKG7,NMI,NOS2,NOX5,NPPA,NR4A1,NRP1,OAS1,OAS2,OAS3,PARP12,PHF11,PLA2G4A,PLD1,PLSCR1,PPT2,PSMB8,PSMB9,PTPRK,SAMHD1,SECTM1,SHANK2,SOCS2,SP110,SPP1,SPRY2,SPSB1,STAT1,SUN2,SUOX,TAP1,TDRD7,TJP1,TLR3,TM4SF5,TMEM87A,TNFRSF1B,TNFSF10,TP53,TRANK1,TRIM21,TRIM22,TRIM38,TRIM5,TSKU,UBE2C,UBE2I,UBE2L6,VDR,VIM,WIPF1,ZNF184                                                                                                                                                                                                                                                                                                                                                                                                                                                                                                                                                                                                                                                                                                                                                                                                        |

|        |        |                                   |           |        |        |       |          |          |                                                                                                                                                                                                                                                                                                                                                                                                                                                                                                                                                                                                                                                                                                                                                                                                                                                                                                                                                                                                                                                                                                                                                                                                                        |
|--------|--------|-----------------------------------|-----------|--------|--------|-------|----------|----------|------------------------------------------------------------------------------------------------------------------------------------------------------------------------------------------------------------------------------------------------------------------------------------------------------------------------------------------------------------------------------------------------------------------------------------------------------------------------------------------------------------------------------------------------------------------------------------------------------------------------------------------------------------------------------------------------------------------------------------------------------------------------------------------------------------------------------------------------------------------------------------------------------------------------------------------------------------------------------------------------------------------------------------------------------------------------------------------------------------------------------------------------------------------------------------------------------------------------|
| PRL    | -0,187 | cytokine                          | Activated | 5,860  | 5,930  | 0,007 | 1,92E-26 | 5,40E-24 | A2M,ABCG2,ACTB,ACTR3,ADAR,ANXA2,ANXA3,ANXA5,ARF3,B2M,BAG1,BCL6,BST2,CAMK2N1,CAPN2,CAV1,CCL20,CCNB1,CCND1,CCND3,CD40,CD69,CISH,CLDN3,CLU,COL1A1,COL1A2,COL3A1,COL5A1,CPD,CTSB,CTSD,CTSS,CTSV,CXCL10,CXCL11,CXCL9,DCN,DDX58,DVL1,EGF,ENO1,ERBB3,ESR1,FN1,FOS,GPNMB,HERC6,HIPK3,HSD11B2,ID1,ID2,ID3,IFI35,IFI44,IFI44L,IFI6,IFIH1,IFIT3,IFIT5,IFITM1,IRF1,IRF7,IRF9,ISG15,KRT19,LAMC1,LAMP3,MAGED1,MGP,MME,MSN,MX2,NFKB1,NOS2,OAS1,OAS2,OAS3,OXT,P4HB,PARM1,PARP12,PC,PCNA,PCOLCE,PDGFRA,PDIA4,PDIA5,PDK2,PDK4,PDLIM4,PGRMC1,PKIG,PLSCR1,PRLR,PSME1,RHOG,RSAD2,SAMD9,SAMHD1,SCP2,SDC1,SERPINA3,SND1,SOCS2,SOD1,SP110,SPARC,SPP1,STAT1,TDRD7,TIMP1,TIMP2,TMEM140,TP53,TUBA1B,VD R VIM XAF4                                                                                                                                                                                                                                                                                                                                                                                                                                                                                                                                 |
| IL2    |        | cytokine                          | Activated | 3,866  | 3,937  | 0,006 | 5,12E-26 | 1,35E-23 | ABCC1,ADCY9,AHR,ANXA1,APOBEC3G,ARHGAP25,ARHGAP32,ARHGAP6,ARNT2,AVP,BAG1,BAX,BCCIP,BCL2A1,BCL6,BHLHE40,BIRC3,C3,CAMK2N1,CAPG,CASP1,CASP3,CASP4,CCL5,CCND1,CCND2,CCND3,CCNG1,CCR2,CCR5,CCR7,CD2,CD247,CD38,CD3D,CD3G,CD40,CD44,CD47,CD58,CD59,CD69,CD74,CD83,CD86,CD8A,CD9,CDKN1B,CDKN1C,CDKN2C,CHN2,CISH,CPD,CRMP1,CSF1R,CSF2RB,CTCF,CTPS1,CX3CR1,CXCL10,CXCL12,CXCR4,CYP27A1,CYP2B6,CYTIP,DAPK2,DARS2,DENND2D,DHODH,DLST,DPP4,DSG2,ELF1,ELMO3,ENPP2,EVL,FAM13B,FAS,FCER1G,FCGR3A/FCGR3B,FCMR,FGF13,FGF7,FGL2,FOS,FOXO1,FYN,GADD45B,GADD45G,GARS1,GNL3,GRN,GZMA,GZMB,GZMK,HCK,HDAC1,HSP90B1,HSPA5,ICAM1,IDI1,IDO1,IFNGR1,IFNGR2,IGFBP4,IL10RA,IL13,IL18,IL1R1,IL2RB,IL2RG,IL4R,IL7R,IRF1,ISG20,ITGA2,ITGB8,ITK,JAK1,JUND,KLRB1,KLRD1,LAPTM5,LCK,LCP2,LTB,LTBP3,MAF,MLLT3,MDM2,MME,MMP2,MMP25,MMP9,MX1,MYB,NAB2,NDRG1,NET1,NETO2,NFKB1,NME1,NMI,NOS2,NRP1,PCNA,PDCD4,PDIA3,PDLIM4,PEA15,PECAM1,PHB,PIK3R3,PLAC8,PNP,POLE2,PRF1,PRKD2,PRKX,PTPN6,PTPRC,RFTN1,RHOB,RNF128,RORC,RRAS2,RUFY1,RXRA,S100A4,S100A8,SCP2,SELL,SELP,SERPINB9,SIRPG,SOCS2,SPP1,STAT1,STAT3,STAT4,STC2,STK17B,SWAP70,TFDP2,TGFBR3,TIMP1,TLR2,TNFAIP8,TNFRSF10D,TNFRSF11B,TNFRSF17,TNFRSF1B,TNFRSF21,TNFSF10,TP53,TPI1,TRAF5,TRIB3,VAV1,VEGFA,VIM,WD |
| PPARA  | -0,276 | ligand-dependent nuclear receptor | Inhibited | -3,242 | -3,214 | 0,003 | 2,70E-25 | 6,91E-23 | ACAA1,ACAA2,ACACA,ACADL,ACADM,ACADS,ACADVL,ACAT1,ACOT8,ACOX1,ACSL1,ACSL5,ADAM10,AGXT,AHCY,ALDH2,ALDH3A2,ALDH9A1,ALDOB,ANXA2,APOA1,APOA4,APOC3,APOE,APOM3,APQ3,ASL,ASNS,ASS1,AURKA,BAX,C1QA,C1QB,C1R,C1S,C2,C3,CAT,CCNA2,CCNB1,CCND1,CD36,CD63,CDK1,CDKN2C,CFH,CIDEC,CPT2,CTH,CXCL12,CYBA,CYBB,CYP27A1,CYP2B6,CYP2C8,CYP4A11,DECR1,DECR2,DHCR7,DIO1,DYNLL1,ECH1,ECI1,ECI2,EHHADH,ELOVL6,ENDOG,FABP1,FABP2,FBXO21,FOS,FTCD,G0S2,G6PC,GLS,GLUD1,GLUL,GNMT,GOT2,GPD1,GPT,GSTK1,GSTP1,GSTZ1,HADH,HADHA,HIF1A,HLA-DQA1,HLA-E,HMGS2,HNF4A,HPD,HSD17B10,HSD17B11,IDI1,IGFBP6,KHK,KIF20A,KYAT1,MAD2L1,MAT2A,ME2,MLYCD,MMD,MMP9,MSMO1,MTNR1A,MTTP,NCF2,NFE2L2,NFKB1,NOS2,NPPA,NR1H3,NSDHL,OGG1,OXT,PAH,PBLD,PC,PCK1,PCNA,PCTP,PDK4,PKLR,PLA2G7,PLIN2,PLTP,PMVK,PNPLA2,POR,PPARA,PPARGC1A,PPM1D,PRC1,QPCT,RETSAT,RNF186,S100A8,S100A9,SARDH,SC5D,SCD,SCP2,SELENBP1,SLC10A2,SLC25A20,SLC27A2,SMC4,SOCS2,TERT,TJP1,TLR2,TLR5,TOP2A,TSPO,TXN,UCP2,UQCRC1,VCAM1,VEGFA                                                                                                                                                                                                                                                                 |
| NFKBIA | -0,188 | transcription regulator           |           | 0,954  | 0,985  | 0,003 | 5,15E-25 | 1,21E-22 | A2M,ACKR3,ADGRE5,AEBP1,AK2,APOA1,ATP6V1B1,AXL,AZGP1,BAX,BCCIP,BCL11A,BCL2A1,BCL2L2,BID,BIRC2,BIRC3,BNIP3,C3,CAPZA2,CASP4,CASP8,CCL20,CCL5,CCNA2,CCNB1,CCND1,CCND2,CD40,CD69,CD86,CDC25B,CDH3,CLU,COL1A2,COL3A1,COL5A2,CSK,CTSB,CTSF,CTSZ,CXCL1,CXCL10,CXCL11,CXCL12,CXCL6,CXCR4,CYBA,CYP1B1,DCN,DDIT3,EIF4G2,ENPP2,ERAP1,ESM1,F3,FAS,FCGRT,FHL2,FN1,FOS,FSCN1,GADD45A,GADD45B,GADD45G,GBP2,GCH1,GM2A,GPX3,GRK5,GRN,GZMB,GZMK,HIF1A,HLA-A,HOXA10,HOXB2,HOXB5,HPSE,HSPA5,HSPA8,ICAM1,IFI16,IFI6,IGFBP6,IL13,IL15,IL15RA,IL33,IL7R,IRAK1,IRF1,ISG15,ITGA2,ITGA3,ITGAV,LAMA5,LCN2,LIMA1,LITAF,MGP,MMP1,MMP9,MPDU1,MR1,MSH2,NAGLU,NFKB1,NFKBIE,NGF,NOCT,NOD2,NOS2,NPPA,NR113,NR4A1,PCNA,PDLIM1,PEA15,PTEN,PTGES,PTP4A2,RAC1,RBP1,RCAN1,ROCK1,RPL8,RRM1,S100A8,S100A9,SDC1,SERPINE2,SFRP1,SGK1,SLC12A2,SOAT1,SOD1,SOD2,TAC1,TCF12,TIMP1,TIMP2,TLR2,TLR4,TNC,TNFAIP2,TNFAIP8,TNFRSF11B,TNFRSF1B,TNFSF10,TOLLIP,TP53,VCAM1,VEGFA,VEGFC,XRCC5,ZNF638                                                                                                                                                                                                                                                                            |

|           |       |                                 |           |        |        |       |          |          |                                                                                                                                                                                                                                                                                                                                                                                                                                                                                                                                                                                                                                                                                                                                                                                                                                                                                                                                                                                                                                                                                                                                                                                                                                          |
|-----------|-------|---------------------------------|-----------|--------|--------|-------|----------|----------|------------------------------------------------------------------------------------------------------------------------------------------------------------------------------------------------------------------------------------------------------------------------------------------------------------------------------------------------------------------------------------------------------------------------------------------------------------------------------------------------------------------------------------------------------------------------------------------------------------------------------------------------------------------------------------------------------------------------------------------------------------------------------------------------------------------------------------------------------------------------------------------------------------------------------------------------------------------------------------------------------------------------------------------------------------------------------------------------------------------------------------------------------------------------------------------------------------------------------------------|
| STAT3     | 0,302 | transcription regulator         |           | 1,765  | 1,818  | 0,005 | 1,24E-24 | 2,75E-22 | A2M,ADM,AHR,ALDH1A3,APOA4,ARG2,BCL6,BNIP3L,BST2,CASP1,CASP3,CAT,CCL20,CCL5,CCNB1,CCND1,CCND2,CCRS5,CD40,CD74,CD83,CD86,CD9,CDH5,CDK1,CDKN1B,CFB,CLIC5,CLN6,COL1A1,COL1A2,COL3A1,COL5A1,CTF1,CTSB,CXCL10,CXCL6,CXCL9,CXCR4,DDIT3,DNMT1,DPP4,ECT2,EED,ENPP2,ESR1,F3,FAS,FCER1G,FERMT2,FGL2,FLRT3,FN1,FOS,FSCN1,FUT4,G6PC,GADD45A,GADD45G,GBP2,GJA1,GLIPR1,GPR65,GZMB,HBB,HERC6,HIF1A,HLA-A,HLA-DMA,HLA-DQA1,HNF4A,HOXA10,ICAM1,ID1,ID2,IFI16,IFI27,IFI30,IFI35,IFI44,IFI6,IFIH1,IFIT2,IFIT3,IFIT5,IFITM1,IFITM2,IHH,IL13,IL1R1,IL2RB,IL4R,IL6R,IL7,IRF1,IRF7,IRF9,ISG15,ISG20,ITGAM,ITGAV,ITGB2,ITGB6,LEPR,LILRB2,LTF,LYZ,MAF,MAFB,MMP2,MMP7,MMP9,MRAS,MUC1,MX1,MX2,MXI1,MYB,MYD88,NAMPT,NDRG1,NFKB1,NOS2,NOX5,NPAP,NRP1,OAS1,OAS2,OAS3,PCK1,PDIA4,PECAM1,PEX1,PFKL,PHB,PLA2G4A,PLSCR1,PPARGC1A,PRF1,PROCR,PROM1,PSIP1,PSMB5,PSMB8,PSMB9,PTPN6,PTTG1,RAB27A,RALGDS,REG1A,RORA,RORC,RRAS2,RSAD2,S100A9,S1PR1,SERPINA3,SERPINB1,SERPINB9,SERPINE2,SGK1,SLC1A3,SLC9A3,SMAD7,SOD2,SP110,STAT1,STAT3,STC2,TAP1,TCF4,TERT,TFF3,TFPI2,TIMP1,TLR3,TNFRSF1B,TNFRSF10,TNS1,TP53,TRIM22,TRIM5,TRPM3,UBD,VCAN,VEGFA,VIL1,WDR34,WDR54,YAF4,YBP4,ZFP96                                                                                                   |
| KRAS      | 0,289 | enzyme                          | Inhibited | -2,602 | -2,602 | 0,000 | 2,44E-24 | 5,30E-22 | ABCC5,ACTR3,AGRN,AHNAK,AHR,AOX1,ATF3,AXL,B2M,BAG1,BIRC3,BNIP3,BZW2,CASP1,CASP3,CAV1,CAVIN1,CCNA2,CCNB1,CCND1,CCND3,CCT5,CD44,CD74,CDH3,CDKN1B,CDKN2C,CLEC10A,CCLIC5,CLU,COL1A1,COL3A1,COL4A1,CSE1L,CXADR,CXCL10,CXCL14,CXCL6,DBN1,DCLK1,DDAH1,DDIT3,DNMT1,DPYSL2,DUSP1,EFEMP1,EIF5,ENO1,EPM2A,EZH2,F2RL1,F3,FAH,FAS,FBN1,FGF7,FKBP11,FLII,FN1,FOS,FOSB,FOSL1,FRAT1,FSTL1,GADD45A,GCLC,GCLM,GCNT3,GFPT1,GJA1,GLUL,GPC3,GRN,GSTA3,GZMK,HIF1A,HLA-DRB1,HOPX,HSPA5,ID1.IDO1,IFI6,IFITM1,IFITM2,IL33,IQGAP2,IRF1,IRF2,IRF9,ISG15,ITGB3,ITM2A,KAT5,KIF22,KPNB1,KRAS,LAMA5,LAMB1,LAMP3,LCN2,LMN1B,LYZ,MAPK12,MAPK8,MCAM,MET,MICB,MMD,MMP2,MMP7,MMP9,MSN,MTHFD1,MTRR,MX1,MX2,NCL,NETO2,NFE2L2,NFKB1,NFYB,NOS2,NR4A1,NSF,NXN,OAS1,PALLD,PCOLCE,PDGFRA,PDIA3,PECAM1,PFKL,PGAM2,PKM,PLD1,PLEKHO2,PMP22,PPFIBP1,PRC1,PRDX4,PRKCD,PRKCI,PTEN,PTGS1,PTTG1,QTRT1,RAB27A,RBBP7,RBM7,RHOA,RHOB,ROCK1,S100A4,S100A6,SAMHD1,SCD,SERPINA3,SERPINE2,SLC25A32,SLC29A1,SLC34A2,SLC35B1,SLC3A2,SLC43A3,SOAT1,SPARC,SPP1,SPRY2,S5,STAT1,STAT3,TAP1,TESC,TGFBR2,THY1,TIMM10,TIMP2,TNC,TNFAIP2,TNFRSF11B,TP53,UBE2I,UQCRC2,VCAN,VEGFA,VIL1,WDR34,WDR54,YAF4,YBP4,ZFP96                                                                                              |
| D-glucose |       | chemical - endogenous mammalian |           | 1,774  | 1,813  | 0,003 | 3,05E-24 | 6,44E-22 | ABCG1,ACAA1,ACAA2,ACACA,ACADL,ACADM,ACE,ACO2,ACOX1,ACSL1,ACTB,ACTN1,ADA,ADAM17,ADIPOR1,AKR1B1,ALDOB,ANXA1,ANXA3,APOC3,AQP1,ARF3,ARF4,ASNS,ASS1,ATF3,ATP2B4,ATP5MC2,BAX,C3,CALB1,CALR,CAP1,CAPZA2,CASP1,CASP3,CAT,CAV1,CBR3,CCL20,CCNB1,CCND1,CCND2,CCND3,CD36,CD55,CD59,CDK1,CDKN1B,CLU,COL1A1,COL3A1,COL4A1,COX6A2,CPD,CPT2,CSF1R,CTSB,CTSV,CXCR4,CYBA,CYBB,DCN,DDIT3,DECR1,DUSP1,EFHD1,ELOVL6,ENO1,FABP2,FAS,FBP1,FN1,FOS,FTO,G6PC,GABARAPL1,GCDH,GCH1,GFPT1,GJA1,GLUL,GOT1,GPD1,GRK2,GRN,HIF1A,HK1,HNF4A,HPRT1,HSPA5,ICAM1,ID1,IDH1,INSR,ITPR3,LAMB1,LAMC1,LCP1,LOC102724788/PRODH,LY96,MAFB,MCAM,MDH2,MIF,MLXIPL,MMP1,MMP2,MMP9,MSRB1,MTOR,NAMPT,NEU1,NFE2L2,NOS2,NOX4,NPHS1,NPY1R,NR4A1,NR4A3,NUAK1,OAT,OGDH,PARP1,PBK,PC,PCCB,PCK1,PCK2,PCNA,PCK1N,PDCC4,PDGFRA,PDIA3,PDIA4,PDIA6,PFKL,PFKP,PGM1,PHB,PINK1,PKLR,PKM,PLIN3,PNPLA3,PON2,PPARA,PPARGC1A,PPIB,PRDX3,PRKZ,PTPN6,RRM2,RTN3,S100A4,SCD,SDHB,SEPHS2,SGK1,SHC1,SIRT2,SIRT3,SIRT4,SLC16A4,SLC1A3,SLC25A1,SLC25A10,SLC25A11,SLC25A5,SLC29A1,SLC2A2,SLC33A1,SLC35B1,SLC37A4,SLC39A14,SLC39A6,SLC3A2,SOD2,SPHK2,SPP1,SSR1,SST,STUB1,STXBP1,SUCLA2,TACSTD2,TAGLN2,TIMP1,TKT,TLR2,TLR4,TP53,TPI1,TRPV4,TRPV5,TXNIP,UCP2,UQCRC2,VAMP2,VCAM1,VEGFA,VIL1,WDR34,WDR54,YAF4,YBP4,ZFP96 |



|              |       |                                 |        |        |        |          |          |                                                                                                                                                                                                                                                                                                                                                                                                                                                                                                                                                                                                                                                                                                                                                                                                                                                                                                                                                                                                                                                                                                                                                                                                                                                                                                                                                                                                                                                                                                                                                                                                                                                                                                                                                                                                                                                                                                                                                                                                                                                                                                                                                                                                                                                                                                                                                                                                                                                                                                                                                                                                                                                                                                                                                                                                                                                                                                                                                                                                                                                                                                                                                                                                                                                                                                                                                                                                                                                                                                                                                                                                                                                                                                                                                                                                                                                                                                                                                                                                                                                                                                                                                                                                                                                                                                                                                                                                                                                                                                                                                                                                                                                                                                                                                                                                                                                                                                                                                                                                                                                                                                                                                                                                                                                                                                                                                                                                                                                                                                                                                                                                                                                                                                                                                                                                                                                                                                                                                                                                                                                                                                                                                                                                                                                                                                                                                                                                                                                                                                                                                                                                                                                                                                                                                                                                                                                                                                                                                                                                                                                                                                                                                                                                                                                                                                                                                                                                                                                                                                                                                                                                                                                                                                                                                                                                                                                                                                                                                                                                                                                                                                                                                                                                                                                                                                                                                                                                                                                                                                                                                                                                                                                                                                                                                                                                                                                                                                                                                                                                                                                                                                                                                                                                                                                                                                                                                                                                                                                                                                                                                                                                                                                                                                                                                                                                                                                                                                                                                                                                                                                                                                                                                                                                                                                                                                                                                                                                                                                                                                                                                                                                                                                                                                                                                                                                                                                                                                                                                                                                                                                                                                                                                                                                    |
|--------------|-------|---------------------------------|--------|--------|--------|----------|----------|----------------------------------------------------------------------------------------------------------------------------------------------------------------------------------------------------------------------------------------------------------------------------------------------------------------------------------------------------------------------------------------------------------------------------------------------------------------------------------------------------------------------------------------------------------------------------------------------------------------------------------------------------------------------------------------------------------------------------------------------------------------------------------------------------------------------------------------------------------------------------------------------------------------------------------------------------------------------------------------------------------------------------------------------------------------------------------------------------------------------------------------------------------------------------------------------------------------------------------------------------------------------------------------------------------------------------------------------------------------------------------------------------------------------------------------------------------------------------------------------------------------------------------------------------------------------------------------------------------------------------------------------------------------------------------------------------------------------------------------------------------------------------------------------------------------------------------------------------------------------------------------------------------------------------------------------------------------------------------------------------------------------------------------------------------------------------------------------------------------------------------------------------------------------------------------------------------------------------------------------------------------------------------------------------------------------------------------------------------------------------------------------------------------------------------------------------------------------------------------------------------------------------------------------------------------------------------------------------------------------------------------------------------------------------------------------------------------------------------------------------------------------------------------------------------------------------------------------------------------------------------------------------------------------------------------------------------------------------------------------------------------------------------------------------------------------------------------------------------------------------------------------------------------------------------------------------------------------------------------------------------------------------------------------------------------------------------------------------------------------------------------------------------------------------------------------------------------------------------------------------------------------------------------------------------------------------------------------------------------------------------------------------------------------------------------------------------------------------------------------------------------------------------------------------------------------------------------------------------------------------------------------------------------------------------------------------------------------------------------------------------------------------------------------------------------------------------------------------------------------------------------------------------------------------------------------------------------------------------------------------------------------------------------------------------------------------------------------------------------------------------------------------------------------------------------------------------------------------------------------------------------------------------------------------------------------------------------------------------------------------------------------------------------------------------------------------------------------------------------------------------------------------------------------------------------------------------------------------------------------------------------------------------------------------------------------------------------------------------------------------------------------------------------------------------------------------------------------------------------------------------------------------------------------------------------------------------------------------------------------------------------------------------------------------------------------------------------------------------------------------------------------------------------------------------------------------------------------------------------------------------------------------------------------------------------------------------------------------------------------------------------------------------------------------------------------------------------------------------------------------------------------------------------------------------------------------------------------------------------------------------------------------------------------------------------------------------------------------------------------------------------------------------------------------------------------------------------------------------------------------------------------------------------------------------------------------------------------------------------------------------------------------------------------------------------------------------------------------------------------------------------------------------------------------------------------------------------------------------------------------------------------------------------------------------------------------------------------------------------------------------------------------------------------------------------------------------------------------------------------------------------------------------------------------------------------------------------------------------------------------------------------------------------------------------------------------------------------------------------------------------------------------------------------------------------------------------------------------------------------------------------------------------------------------------------------------------------------------------------------------------------------------------------------------------------------------------------------------------------------------------------------------------------------------------------------------------------------------------------------------------------------------------------------------------------------------------------------------------------------------------------------------------------------------------------------------------------------------------------------------------------------------------------------------------------------------------------------------------------------------------------------------------------------------------------------------------------------------------------------------------------------------------------------------------------------------------------------------------------------------------------------------------------------------------------------------------------------------------------------------------------------------------------------------------------------------------------------------------------------------------------------------------------------------------------------------------------------------------------------------------------------------------------------------------------------------------------------------------------------------------------------------------------------------------------------------------------------------------------------------------------------------------------------------------------------------------------------------------------------------------------------------------------------------------------------------------------------------------------------------------------------------------------------------------------------------------------------------------------------------------------------------------------------------------------------------------------------------------------------------------------------------------------------------------------------------------------------------------------------------------------------------------------------------------------------------------------------------------------------------------------------------------------------------------------------------------------------------------------------------------------------------------------------------------------------------------------------------------------------------------------------------------------------------------------------------------------------------------------------------------------------------------------------------------------------------------------------------------------------------------------------------------------------------------------------------------------------------------------------------------------------------------------------------------------------------------------------------------------------------------------------------------------------------------------------------------------------------------------------------------------------------------------------------------------------------------------------------------------------------------------------------------------------------------------------------------------------------------------------------------------------------------------------------------------------------------------------------------------------------------------------------------------------------------------------------------------------------------------------------------------------------------------------------------------------------------------------------------------------------------------------------------------------------------------------------------------------------------------------------------------------------------------------------------------------------|
| FAS          | 0,651 | transmembrane receptor          | -0,326 | -0,330 | -0,001 | 3,38E-24 | 6,97E-22 | AIFM1,ANXA2,ARAP2,BAX,BCL11A,BCL2A1,BID,BIRC2,BIRC3,BTN3A3,CAMK2G,CASP3,CASP8,CAST,CCL20,CCL5,CD1D,CD200,CD44,CD48,CD59,CD83,CD86,CD93,CDKN1B,CLTB,COL15A1,COL18A1,COL1A1,COL1A2,COL3A1,COL4A1,COL4A2,COL5A1,COL6A3,CXCL1,CXCL10,CXCL11,CXCL6,CXCL9,F2RL1,F3,FAS,FBN1,FCGR2B,FGF2,FOS,FOSB,FOXO1,FPR1,FSCN1,GADD45G,GBP1,GBP2,GLIPR1,GNAI2,GNG7,GPNMB,GRK5,GTPBP6,HLA-DQB1,HLA-DQA1,IL10RA,IL13RA1,IL15RA,IL18,IMPA2,INPP5D,IQGAP2,IRF1,ITGA7,ITGAV,ITGB8,JUND,LAMP3,LAT,LILRB2,LST1,LTB,LUM,LY75,MAP4K4,MEF2C,MET,MGP,MIF,MME,MMP1,MMP9,MPZL1,NFKBIE,NOS2,NR4A1,OPTN,PAK2,PECAM1,PIK3C2B,PINK1,PLD1,PLIN2,PPP1R15A,PRKCI,PTP4A1,PTP4A2,PTPRN2,PVALB,RDX,RSAD2,SDC1,SELP,SERPINB9,SHC1,SLPI,SOD2,SPP1,STK17B,STK38,SYK,TAGLN2,TLN2,TLR2,TLR8,TNC,TNFAIP6,TNFRSF11B,TNFRSF1B,TNFSF10,TP53BP1,TPM1,TWF2,TYK2,UGCG,VCAM1,VEGFA,VRK2,WNK1,XPC,ZFP36                                                                                                                                                                                                                                                                                                                                                                                                                                                                                                                                                                                                                                                                                                                                                                                                                                                                                                                                                                                                                                                                                                                                                                                                                                                                                                                                                                                                                                                                                                                                                                                                                                                                                                                                                                                                                                                                                                                                                                                                                                                                                                                                                                                                                                                                                                                                                                                                                                                                                                                                                                                                                                                                                                                                                                                                                                                                                                                                                                                                                                                                                                                                                                                                                                                                                                                                                                                                                                                                                                                                                                                                                                                                                                                                                                                                                                                                                                                                                                                                                                                                                                                                                                                                                                                                                                                                                                                                                                                                                                                                                                                                                                                                                                                                                                                                                                                                                                                                                                                                                                                                                                                                                                                                                                                                                                                                                                                                                                                                                                                                                                                                                                                                                                                                                                                                                                                                                                                                                                                                                                                                                                                                                                                                                                                                                                                                                                                                                                                                                                                                                                                                                                                                                                                                                                                                                                                                                                                                                                                                                                                                                                                                                                                                                                                                                                                                                                                                                                                                                                                                                                                                                                                                                                                                                                                                                                                                                                                                                                                                                                                                                                                                                                                                                                                                                                                                                                                                                                                                                                                                                                                                                                                                                                                                                                                                                                                                                                                                                                                                                                                                                                                                                                                                                                                                                                                                                                                                                                                                                                                                                                                                                                                                                                                                                                                                                                                                                                                                                                                                                                                                                                                                                                                                                                                                                                                                                    |
| HRAS         | 0,086 | enzyme                          | 1,544  | 1,571  | 0,003  | 9,57E-24 | 1,88E-21 | A2M,ACTB,ACTG1,ADGRE5,ADM,ADRA2A,AFF,ALDH1A3,ANXA2,ANXA3,ASAP1,ASNS,ATP1A3,AURKA,B2M,BAX,BIRC3,BMP7,BNIP3,CALCRL,CALU,CAPG,CAPN2,CAV1,CCL5,CCNA2,CCNB1,CCND1,CCND2,CCND3,CCNG1,CD24,CD44,CD69,CD81,CD96,CDH3,CDK1,CDKN1B,CDX2,CFB,CFH,CGA,CHST12,CISH,CLU,CNN2,COL18A1,COL1A1,COL1A2,COL3A1,COL4A1,COL5A2,CSTA,CTSB,CTSS,CTSV,CTSZ,CXCL1,CXCL10,CXCL12,DDIT3,DNMT1,DOK1,DPF1,DPP4,DTYMK,DUSP1,DUSP9,EFEMP1,EIF2D,EIF4G3,ELK3,EPHX1,FAS,FERMT2,FHL1,FKBP6,FLNA,FN1,FOS,FOSB,FOSL1,FOXO1,FSTL1,FZD2,GADD45G,GJA1,GNB1,GPX3,GRN,HDHD5,HIF1A,HLA-B,HOXB6,HSPA8,HTRA1,ICAM1,ID2,IFI30,IFITM2,IGFBP4,IGKC,IL13RA1,IL7R,IQGAP2,ITGAM,ITGAV,KRAS,KRT19,LNMB1,LOXL1,LSP1,LXN,LYZ,MAOB,MAPK12,MCAM,MET,MMP1,MMP2,MMP9,MSMO1,MSRB1,MUC13,MYL12A,MYL3,NID2,NOS2,NPPA,NRP1,P4HB,PAFAH1B3,PCK1,PCNA,PCD4,PDGFRA,PDIA5,PDLIM1,PFN1,PLA2G4A,PLOD1,PLOD2,PLS3,PLTP,POLR2G,POSTN,PPIC,PRDX2,PRKCA,PRKCD,PRNP,PRR5,PSMB9,PTEN,PTGS1,PTPRE,RASGRP1,RBBP7,RBPMS,RECK,RHOA,RHOB,RNF19B,RPL23,RPS3,RRM1,RRM2,RSU1,S100A4,SASH1,SEM1,SERPINA3,SERPINB9,SERPINE2,SLC2A2,SMC3,SOAT1,SOCS2,SOD1,SOX4,SP3,SPARC,SPON1,SPP1,SPRY2,STAU1,STK10,TACC3,TAP1,TAP2,TBP,TERT,TG,TLN2,TMSB10,TMSB4X,TP2A,TP53,TRPV1,TSC22D1,TYRO3,VCAN,VEGFA,VIM                                                                                                                                                                                                                                                                                                                                                                                                                                                                                                                                                                                                                                                                                                                                                                                                                                                                                                                                                                                                                                                                                                                                                                                                                                                                                                                                                                                                                                                                                                                                                                                                                                                                                                                                                                                                                                                                                                                                                                                                                                                                                                                                                                                                                                                                                                                                                                                                                                                                                                                                                                                                                                                                                                                                                                                                                                                                                                                                                                                                                                                                                                                                                                                                                                                                                                                                                                                                                                                                                                                                                                                                                                                                                                                                                                                                                                                                                                                                                                                                                                                                                                                                                                                                                                                                                                                                                                                                                                                                                                                                                                                                                                                                                                                                                                                                                                                                                                                                                                                                                                                                                                                                                                                                                                                                                                                                                                                                                                                                                                                                                                                                                                                                                                                                                                                                                                                                                                                                                                                                                                                                                                                                                                                                                                                                                                                                                                                                                                                                                                                                                                                                                                                                                                                                                                                                                                                                                                                                                                                                                                                                                                                                                                                                                                                                                                                                                                                                                                                                                                                                                                                                                                                                                                                                                                                                                                                                                                                                                                                                                                                                                                                                                                                                                                                                                                                                                                                                                                                                                                                                                                                                                                                                                                                                                                                                                                                                                                                                                                                                                                                                                                                                                                                                                                                                                                                                                                                                                                                                                                                                                                                                                                                                                                                                                                                                                                                                                                                                                                                       |
| butyric acid |       | chemical - endogenous mammalian | -0,582 | -0,572 | 0,001  | 1,02E-23 | 1,96E-21 | A2M,ABCC2,ADGRE5,ADGRG1,ADH6,ALAD,ALB,A LOX5,ALPG,ANXA1,ANXA2,ANXA5,AQP1,ATP2B4,BAG1,BAX,BCL2A1,C7,CALB1,CALM1 (includes others),CAP1,CASP3,CCL20,CCNA2,CCNB1,CCNB2,CCND1,CCND2,CCNG1,CCNH,CCR5,CD44,CD81,CD83,CD86,CDH11,CDK1,CDK5,CDKN1B,CDKN1C,CGA,CLCN3,CLDN1,CLU,COL4A1,COL4A2,COL5A1,COL5A2,COL6A3,CPA3,CUL1,CXCR4,CYP2B6,CYP4A11,DDR1,DEK,DTYMK,DUSP1,EIF4G2,ELK3,EMP3,ERCC2,ESR1,FOS,FSTL1,FYN,G0S2,G6PC,GADD45A,GAK,GBP2,GCLC,GLI3,GNAI2,GRN,GSTA1,GSTP1,HBB,HK1,HLA-DRA,HLA-DRB1,HMGB2,ICAM1,IFI16,IFI30,IFIT3,IFITM1,IFITM2,IFNAR2,IFNGR2,IL1R1,IL32,INPP5D,INPP5J,IQGAP1,IRF1,IRF2,ITGAM,ITPR3,JCHAIN,KRAS,MAPK13,MMP7,MMP9,MUC1,MYB,NAMPT,NCL,NDUF4F4,NEU1,NFATC4,NFKB1,NKX2-5,NME1,NOS2,NR4A1,NRP1,NUCB1,OAS2,PCK1,PCNA,PDIA3,PDK2,PDK3,PFKL,PGRMC2,PHB,PLSCR1,PRKCD,PRLR,PTEN,PTGS1,PTPRM,PYGL,RB1,RHOA,RXRA,SGK1,SLC26A2,SMPD1,SPP1,STAT3,SYK,TFF3,TGFBI,TGFBR2,THBS4,TIMP1,TNFAIP2,TP2A,TP53,TP53BP2,TP53BP1,TP53BP4,TP53BP5,TP53BP7,TP53BP8,TP53BP9,TP53BP10,TP53BP11,TP53BP12,TP53BP13,TP53BP14,TP53BP15,TP53BP16,TP53BP17,TP53BP18,TP53BP19,TP53BP20,TP53BP21,TP53BP22,TP53BP23,TP53BP24,TP53BP25,TP53BP26,TP53BP27,TP53BP28,TP53BP29,TP53BP30,TP53BP31,TP53BP32,TP53BP33,TP53BP34,TP53BP35,TP53BP36,TP53BP37,TP53BP38,TP53BP39,TP53BP40,TP53BP41,TP53BP42,TP53BP43,TP53BP44,TP53BP45,TP53BP46,TP53BP47,TP53BP48,TP53BP49,TP53BP50,TP53BP51,TP53BP52,TP53BP53,TP53BP54,TP53BP55,TP53BP56,TP53BP57,TP53BP58,TP53BP59,TP53BP60,TP53BP61,TP53BP62,TP53BP63,TP53BP64,TP53BP65,TP53BP66,TP53BP67,TP53BP68,TP53BP69,TP53BP70,TP53BP71,TP53BP72,TP53BP73,TP53BP74,TP53BP75,TP53BP76,TP53BP77,TP53BP78,TP53BP79,TP53BP80,TP53BP81,TP53BP82,TP53BP83,TP53BP84,TP53BP85,TP53BP86,TP53BP87,TP53BP88,TP53BP89,TP53BP90,TP53BP91,TP53BP92,TP53BP93,TP53BP94,TP53BP95,TP53BP96,TP53BP97,TP53BP98,TP53BP99,TP53BP100,TP53BP101,TP53BP102,TP53BP103,TP53BP104,TP53BP105,TP53BP106,TP53BP107,TP53BP108,TP53BP109,TP53BP110,TP53BP111,TP53BP112,TP53BP113,TP53BP114,TP53BP115,TP53BP116,TP53BP117,TP53BP118,TP53BP119,TP53BP120,TP53BP121,TP53BP122,TP53BP123,TP53BP124,TP53BP125,TP53BP126,TP53BP127,TP53BP128,TP53BP129,TP53BP130,TP53BP131,TP53BP132,TP53BP133,TP53BP134,TP53BP135,TP53BP136,TP53BP137,TP53BP138,TP53BP139,TP53BP140,TP53BP141,TP53BP142,TP53BP143,TP53BP144,TP53BP145,TP53BP146,TP53BP147,TP53BP148,TP53BP149,TP53BP150,TP53BP151,TP53BP152,TP53BP153,TP53BP154,TP53BP155,TP53BP156,TP53BP157,TP53BP158,TP53BP159,TP53BP160,TP53BP161,TP53BP162,TP53BP163,TP53BP164,TP53BP165,TP53BP166,TP53BP167,TP53BP168,TP53BP169,TP53BP170,TP53BP171,TP53BP172,TP53BP173,TP53BP174,TP53BP175,TP53BP176,TP53BP177,TP53BP178,TP53BP179,TP53BP180,TP53BP181,TP53BP182,TP53BP183,TP53BP184,TP53BP185,TP53BP186,TP53BP187,TP53BP188,TP53BP189,TP53BP190,TP53BP191,TP53BP192,TP53BP193,TP53BP194,TP53BP195,TP53BP196,TP53BP197,TP53BP198,TP53BP199,TP53BP200,TP53BP201,TP53BP202,TP53BP203,TP53BP204,TP53BP205,TP53BP206,TP53BP207,TP53BP208,TP53BP209,TP53BP210,TP53BP211,TP53BP212,TP53BP213,TP53BP214,TP53BP215,TP53BP216,TP53BP217,TP53BP218,TP53BP219,TP53BP220,TP53BP221,TP53BP222,TP53BP223,TP53BP224,TP53BP225,TP53BP226,TP53BP227,TP53BP228,TP53BP229,TP53BP230,TP53BP231,TP53BP232,TP53BP233,TP53BP234,TP53BP235,TP53BP236,TP53BP237,TP53BP238,TP53BP239,TP53BP240,TP53BP241,TP53BP242,TP53BP243,TP53BP244,TP53BP245,TP53BP246,TP53BP247,TP53BP248,TP53BP249,TP53BP250,TP53BP251,TP53BP252,TP53BP253,TP53BP254,TP53BP255,TP53BP256,TP53BP257,TP53BP258,TP53BP259,TP53BP260,TP53BP261,TP53BP262,TP53BP263,TP53BP264,TP53BP265,TP53BP266,TP53BP267,TP53BP268,TP53BP269,TP53BP270,TP53BP271,TP53BP272,TP53BP273,TP53BP274,TP53BP275,TP53BP276,TP53BP277,TP53BP278,TP53BP279,TP53BP280,TP53BP281,TP53BP282,TP53BP283,TP53BP284,TP53BP285,TP53BP286,TP53BP287,TP53BP288,TP53BP289,TP53BP290,TP53BP291,TP53BP292,TP53BP293,TP53BP294,TP53BP295,TP53BP296,TP53BP297,TP53BP298,TP53BP299,TP53BP300,TP53BP301,TP53BP302,TP53BP303,TP53BP304,TP53BP305,TP53BP306,TP53BP307,TP53BP308,TP53BP309,TP53BP310,TP53BP311,TP53BP312,TP53BP313,TP53BP314,TP53BP315,TP53BP316,TP53BP317,TP53BP318,TP53BP319,TP53BP320,TP53BP321,TP53BP322,TP53BP323,TP53BP324,TP53BP325,TP53BP326,TP53BP327,TP53BP328,TP53BP329,TP53BP330,TP53BP331,TP53BP332,TP53BP333,TP53BP334,TP53BP335,TP53BP336,TP53BP337,TP53BP338,TP53BP339,TP53BP340,TP53BP341,TP53BP342,TP53BP343,TP53BP344,TP53BP345,TP53BP346,TP53BP347,TP53BP348,TP53BP349,TP53BP350,TP53BP351,TP53BP352,TP53BP353,TP53BP354,TP53BP355,TP53BP356,TP53BP357,TP53BP358,TP53BP359,TP53BP360,TP53BP361,TP53BP362,TP53BP363,TP53BP364,TP53BP365,TP53BP366,TP53BP367,TP53BP368,TP53BP369,TP53BP370,TP53BP371,TP53BP372,TP53BP373,TP53BP374,TP53BP375,TP53BP376,TP53BP377,TP53BP378,TP53BP379,TP53BP380,TP53BP381,TP53BP382,TP53BP383,TP53BP384,TP53BP385,TP53BP386,TP53BP387,TP53BP388,TP53BP389,TP53BP390,TP53BP391,TP53BP392,TP53BP393,TP53BP394,TP53BP395,TP53BP396,TP53BP397,TP53BP398,TP53BP399,TP53BP400,TP53BP401,TP53BP402,TP53BP403,TP53BP404,TP53BP405,TP53BP406,TP53BP407,TP53BP408,TP53BP409,TP53BP410,TP53BP411,TP53BP412,TP53BP413,TP53BP414,TP53BP415,TP53BP416,TP53BP417,TP53BP418,TP53BP419,TP53BP420,TP53BP421,TP53BP422,TP53BP423,TP53BP424,TP53BP425,TP53BP426,TP53BP427,TP53BP428,TP53BP429,TP53BP430,TP53BP431,TP53BP432,TP53BP433,TP53BP434,TP53BP435,TP53BP436,TP53BP437,TP53BP438,TP53BP439,TP53BP440,TP53BP441,TP53BP442,TP53BP443,TP53BP444,TP53BP445,TP53BP446,TP53BP447,TP53BP448,TP53BP449,TP53BP450,TP53BP451,TP53BP452,TP53BP453,TP53BP454,TP53BP455,TP53BP456,TP53BP457,TP53BP458,TP53BP459,TP53BP460,TP53BP461,TP53BP462,TP53BP463,TP53BP464,TP53BP465,TP53BP466,TP53BP467,TP53BP468,TP53BP469,TP53BP470,TP53BP471,TP53BP472,TP53BP473,TP53BP474,TP53BP475,TP53BP476,TP53BP477,TP53BP478,TP53BP479,TP53BP480,TP53BP481,TP53BP482,TP53BP483,TP53BP484,TP53BP485,TP53BP486,TP53BP487,TP53BP488,TP53BP489,TP53BP490,TP53BP491,TP53BP492,TP53BP493,TP53BP494,TP53BP495,TP53BP496,TP53BP497,TP53BP498,TP53BP499,TP53BP500,TP53BP501,TP53BP502,TP53BP503,TP53BP504,TP53BP505,TP53BP506,TP53BP507,TP53BP508,TP53BP509,TP53BP510,TP53BP511,TP53BP512,TP53BP513,TP53BP514,TP53BP515,TP53BP516,TP53BP517,TP53BP518,TP53BP519,TP53BP520,TP53BP521,TP53BP522,TP53BP523,TP53BP524,TP53BP525,TP53BP526,TP53BP527,TP53BP528,TP53BP529,TP53BP530,TP53BP531,TP53BP532,TP53BP533,TP53BP534,TP53BP535,TP53BP536,TP53BP537,TP53BP538,TP53BP539,TP53BP540,TP53BP541,TP53BP542,TP53BP543,TP53BP544,TP53BP545,TP53BP546,TP53BP547,TP53BP548,TP53BP549,TP53BP550,TP53BP551,TP53BP552,TP53BP553,TP53BP554,TP53BP555,TP53BP556,TP53BP557,TP53BP558,TP53BP559,TP53BP560,TP53BP561,TP53BP562,TP53BP563,TP53BP564,TP53BP565,TP53BP566,TP53BP567,TP53BP568,TP53BP569,TP53BP570,TP53BP571,TP53BP572,TP53BP573,TP53BP574,TP53BP575,TP53BP576,TP53BP577,TP53BP578,TP53BP579,TP53BP580,TP53BP581,TP53BP582,TP53BP583,TP53BP584,TP53BP585,TP53BP586,TP53BP587,TP53BP588,TP53BP589,TP53BP590,TP53BP591,TP53BP592,TP53BP593,TP53BP594,TP53BP595,TP53BP596,TP53BP597,TP53BP598,TP53BP599,TP53BP600,TP53BP601,TP53BP602,TP53BP603,TP53BP604,TP53BP605,TP53BP606,TP53BP607,TP53BP608,TP53BP609,TP53BP610,TP53BP611,TP53BP612,TP53BP613,TP53BP614,TP53BP615,TP53BP616,TP53BP617,TP53BP618,TP53BP619,TP53BP620,TP53BP621,TP53BP622,TP53BP623,TP53BP624,TP53BP625,TP53BP626,TP53BP627,TP53BP628,TP53BP629,TP53BP630,TP53BP631,TP53BP632,TP53BP633,TP53BP634,TP53BP635,TP53BP636,TP53BP637,TP53BP638,TP53BP639,TP53BP640,TP53BP641,TP53BP642,TP53BP643,TP53BP644,TP53BP645,TP53BP646,TP53BP647,TP53BP648,TP53BP649,TP53BP650,TP53BP651,TP53BP652,TP53BP653,TP53BP654,TP53BP655,TP53BP656,TP53BP657,TP53BP658,TP53BP659,TP53BP660,TP53BP661,TP53BP662,TP53BP663,TP53BP664,TP53BP665,TP53BP666,TP53BP667,TP53BP668,TP53BP669,TP53BP670,TP53BP671,TP53BP672,TP53BP673,TP53BP674,TP53BP675,TP53BP676,TP53BP677,TP53BP678,TP53BP679,TP53BP680,TP53BP681,TP53BP682,TP53BP683,TP53BP684,TP53BP685,TP53BP686,TP53BP687,TP53BP688,TP53BP689,TP53BP690,TP53BP691,TP53BP692,TP53BP693,TP53BP694,TP53BP695,TP53BP696,TP53BP697,TP53BP698,TP53BP699,TP53BP700,TP53BP701,TP53BP702,TP53BP703,TP53BP704,TP53BP705,TP53BP706,TP53BP707,TP53BP708,TP53BP709,TP53BP710,TP53BP711,TP53BP712,TP53BP713,TP53BP714,TP53BP715,TP53BP716,TP53BP717,TP53BP718,TP53BP719,TP53BP720,TP53BP721,TP53BP722,TP53BP723,TP53BP724,TP53BP725,TP53BP726,TP53BP727,TP53BP728,TP53BP729,TP53BP730,TP53BP731,TP53BP732,TP53BP733,TP53BP734,TP53BP735,TP53BP736,TP53BP737,TP53BP738,TP53BP739,TP53BP740,TP53BP741,TP53BP742,TP53BP743,TP53BP744,TP53BP745,TP53BP746,TP53BP747,TP53BP748,TP53BP749,TP53BP750,TP53BP751,TP53BP752,TP53BP753,TP53BP754,TP53BP755,TP53BP756,TP53BP757,TP53BP758,TP53BP759,TP53BP760,TP53BP761,TP53BP762,TP53BP763,TP53BP764,TP53BP765,TP53BP766,TP53BP767,TP53BP768,TP53BP769,TP53BP770,TP53BP771,TP53BP772,TP53BP773,TP53BP774,TP53BP775,TP53BP776,TP53BP777,TP53BP778,TP53BP779,TP53BP780,TP53BP781,TP53BP782,TP53BP783,TP53BP784,TP53BP785,TP53BP786,TP53BP787,TP53BP788,TP53BP789,TP53BP790,TP53BP791,TP53BP792,TP53BP793,TP53BP794,TP53BP795,TP53BP796,TP53BP797,TP53BP798,TP53BP799,TP53BP800,TP53BP801,TP53BP802,TP53BP803,TP53BP804,TP53BP805,TP53BP806,TP53BP807,TP53BP808,TP53BP809,TP53BP810,TP53BP811,TP53BP812,TP53BP813,TP53BP814,TP53BP815,TP53BP816,TP53BP817,TP53BP818,TP53BP819,TP53BP820,TP53BP821,TP53BP822,TP53BP823,TP53BP824,TP53BP825,TP53BP826,TP53BP827,TP53BP828,TP53BP829,TP53BP830,TP53BP831,TP53BP832,TP53BP833,TP53BP834,TP53BP835,TP53BP836,TP53BP837,TP53BP838,TP53BP839,TP53BP840,TP53BP841,TP53BP842,TP53BP843,TP53BP844,TP53BP845,TP53BP846,TP53BP847,TP53BP848,TP53BP849,TP53BP850,TP53BP851,TP53BP852,TP53BP853,TP53BP854,TP53BP855,TP53BP856,TP53BP857,TP53BP858,TP53BP859,TP53BP860,TP53BP861,TP53BP862,TP53BP863,TP53BP864,TP53BP865,TP53BP866,TP53BP867,TP53BP868,TP53BP869,TP53BP870,TP53BP871,TP53BP872,TP53BP873,TP53BP874,TP53BP875,TP53BP876,TP53BP877,TP53BP878,TP53BP879,TP53BP880,TP53BP881,TP53BP882,TP53BP883,TP53BP884,TP53BP885,TP53BP886,TP53BP887,TP53BP888,TP53BP889,TP53BP890,TP53BP891,TP53BP892,TP53BP893,TP53BP894,TP53BP895,TP53BP896,TP53BP897,TP53BP898,TP53BP899,TP53BP900,TP53BP901,TP53BP902,TP53BP903,TP53BP904,TP53BP905,TP53BP906,TP53BP907,TP53BP908,TP53BP909,TP53BP910,TP53BP911,TP53BP912,TP53BP913,TP53BP914,TP53BP915,TP53BP916,TP53BP917,TP53BP918,TP53BP919,TP53BP920,TP53BP921,TP53BP922,TP53BP923,TP53BP924,TP53BP925,TP53BP926,TP53BP927,TP53BP928,TP53BP929,TP53BP930,TP53BP931,TP53BP932,TP53BP933,TP53BP934,TP53BP935,TP53BP936,TP53BP937,TP53BP938,TP53BP939,TP53BP940,TP53BP941,TP53BP942,TP53BP943,TP53BP944,TP53BP945,TP53BP946,TP53BP947,TP53BP948,TP53BP949,TP53BP950,TP53BP951,TP53BP952,TP53BP953,TP53BP954,TP53BP955,TP53BP956,TP53BP957,TP53BP958,TP53BP959,TP53BP960,TP53BP961,TP53BP962,TP53BP963,TP53BP964,TP53BP965,TP53BP966,TP53BP967,TP53BP968,TP53BP969,TP53BP970,TP53BP971,TP53BP972,TP53BP973,TP53BP974,TP53BP975,TP53BP976,TP53BP977,TP53BP978,TP53BP979,TP53BP980,TP53BP981,TP53BP982,TP53BP983,TP53BP984,TP53BP985,TP53BP986,TP53BP987,TP53BP988,TP53BP989,TP53BP990,TP53BP991,TP53BP992,TP53BP993,TP53BP994,TP53BP995,TP53BP996,TP53BP997,TP53BP998,TP53BP999,TP53BP1000 |
| PML          |       | transcription regulator         | 4,475  | 4,480  | 0,001  | 1,44E-23 | 2,71E-21 | ACACA,ACACB,ACADL,ACADM,ACADS,ACOX1,ACTG1,AKR1A1,AKR7A2,ANXA4,APOA1,APOE,BAX,BST2,CAT,CCND1,CEBPE,CPE,CXCL1,CXCL11,CXCR4,DDX60,DNAJB9,FABP1,FAS,FTL,GADD45A,GCLM,HBB,HERC6,HLA-DMB,HLA-DRA,ID2,IFI27,IFI35,IFI44,IFI44L,IFIH1,IFIT3,IFITM1,IRF7,ISG15,ISG20,LYZ,MAF,MAFF,MCM6,MX1,NDRG1,NFE2L2,OAS1,OAS2,OAS3,PDP2,PDK4,PIK3CB,PLSCR1,PPARGC1A,PRKCA,PRKCH,PSMB8,PSMB9,RRAS2,RSU1,RXRA,SCD,SLC25A20,STAT1,STMN1,TAP1,TAP2,TBX2.TOPBP1.TP53.TXN.TXN2.UBE2M.UCP2.VIM                                                                                                                                                                                                                                                                                                                                                                                                                                                                                                                                                                                                                                                                                                                                                                                                                                                                                                                                                                                                                                                                                                                                                                                                                                                                                                                                                                                                                                                                                                                                                                                                                                                                                                                                                                                                                                                                                                                                                                                                                                                                                                                                                                                                                                                                                                                                                                                                                                                                                                                                                                                                                                                                                                                                                                                                                                                                                                                                                                                                                                                                                                                                                                                                                                                                                                                                                                                                                                                                                                                                                                                                                                                                                                                                                                                                                                                                                                                                                                                                                                                                                                                                                                                                                                                                                                                                                                                                                                                                                                                                                                                                                                                                                                                                                                                                                                                                                                                                                                                                                                                                                                                                                                                                                                                                                                                                                                                                                                                                                                                                                                                                                                                                                                                                                                                                                                                                                                                                                                                                                                                                                                                                                                                                                                                                                                                                                                                                                                                                                                                                                                                                                                                                                                                                                                                                                                                                                                                                                                                                                                                                                                                                                                                                                                                                                                                                                                                                                                                                                                                                                                                                                                                                                                                                                                                                                                                                                                                                                                                                                                                                                                                                                                                                                                                                                                                                                                                                                                                                                                                                                                                                                                                                                                                                                                                                                                                                                                                                                                                                                                                                                                                                                                                                                                                                                                                                                                                                                                                                                                                                                                                                                                                                                                                                                                                                                                                                                                                                                                                                                                                                                                                                                                                                                                                                                                                                                                                                                                                                                                                                                                                                                                                                                                                                 |

|                |        |          |           |        |        |       |          |          |                                                                                                                                                                                                                                                                                                                                                                                                                                                                                                                                                                                                                                                                                                                                                                                                                                                                                                                                                                                                                       |
|----------------|--------|----------|-----------|--------|--------|-------|----------|----------|-----------------------------------------------------------------------------------------------------------------------------------------------------------------------------------------------------------------------------------------------------------------------------------------------------------------------------------------------------------------------------------------------------------------------------------------------------------------------------------------------------------------------------------------------------------------------------------------------------------------------------------------------------------------------------------------------------------------------------------------------------------------------------------------------------------------------------------------------------------------------------------------------------------------------------------------------------------------------------------------------------------------------|
| IL5            |        | cytokine | Activated | 2,644  | 2,743  | 0,009 | 2,52E-23 | 4,60E-21 | A2M,ACAA2,ACP5,ANXA2,AOC1,ASNS,ASS1,BCL6,BIRC2,BNIP3,BNIP3L,CA4,CASP4,CCND2,CCND3,CCNH,CCR2,CCR5,CCR7,CD24,CD40,CD55,CD63,CD69,CD9,CDC123,CFHR2,CHST12,CISH,CKAP4,CLEC2B,CRELD2,CRIP1,CSF2RB,CX3CR1,CXCR4,EAF2,EBP,EGOT,ELL2,ENDOG,ENO1,FAS,FCGR2B,FGL2,GADD45A,GADD45G,GALK1,GBP2,GCAT,GCLM,GK,HIF1A,HSP90B1,HSPA5,ICAM1,IDI1,IFI30,IGHM,IL13,IL13RA1,IL2RG,IL4R,IL6R,IRF7,ITGAM,ITGAV,ITGB6,JCHAIN,KCNAB2,KLHDC2,LCP2,LMMNB1,LTB,LUM,MANF,MAT2A,MD,MMP9,NDRG1,NFIL3,NOS2,P4HA1,PDIA6,PDLIM1,PFKP,PGM1,PKM,PMP22,PRDX4,PSAT1,PTPRC,QSOX1,RAB21,RBPMS,RHOH,RIPOR2,RRAS2,S100A4,S100A6,SDF2L1,SGK1,SLC16A3,SLC1A5,SOCS2,SRI,ST7,STK39,THY1,TLR1,TPI1,TRA2A,UPB1,VIM,XBP1                                                                                                                                                                                                                                                                                                                                               |
| Immunoglobulin |        | complex  |           | -0,155 | -0,154 | 0,000 | 2,56E-23 | 4,60E-21 | ACACA,ACO1,ACO2,ACSL1,ADIPOR1,ADM,BCL2A1,BCL6,BIRC3,BLVRB,C3AR1,CALR,CAPG,CASP4,CCL18,CCL5,CCL8,CCND2,CCND3,CCR2,CCR7,CD14,CD40,CD44,CD69,CD74,CD83,CD86,CDKN1B,CDKN1C,CHN2,CISH,COX11,CSF1R,CSF2RB,CTH,CTS2,CXCL1,CXCL10,CXCL11,CXCL12,CXCL6,CXCL9,CXCR4,CYP1B1,CYP27B1,DLAT,DLA,DLST,DPYSL2,DUSP1,ENO1,ENO3,EXT1,EZH2,F3,FAS,FBP1,FCER1G,FCGR3A/FCGR3B,FOS,FOSB,FPR1,FTO,G6PC,GYS1,GZMB,HCK,HLA-DQB1,HSD11B2,ICAM1,IDO1,IFI30,IFNGR2,IGFBP4,IL10RA,IL10RB,IL13,IL18,IL2RB,IL32,IL33,IL4R,IL7R,IMPDH2,IRAK1,IRF1,IRF7,ITGB8,JCHAIN,KCTD12,KLRD1,LCK,L2CN2,LILRB2,LST1,LTBP3,MAF,MAFF,MAPT,MDH2,MEF2C,MICAL2,MMP1,MMP2,MMP9,MTHFD1,MTHFD2,MTOR,MZB1,NAMPT,NCF2,NDUFA10,NDUFA3,NDUFA7,NDUFB7,NDUFS1,NDUFS7,NDUFS8,NFIL3,NOS2,NR4A1,NRP1,OGDH,PC,PCK1,PCK2,PDIA6,PKK3,PKK4,PDLIM4,PFKL,PGAM2,PGM1,PKLR,PLSCR1,PRF1,RAB31,RB1,RBK5,RNF128,RORC,RPIA,RSAD2,S100A8,S100A9,SCD,SCP2,SDC1,SDHD,SELL,SOD1,SOD2,SPP1,STATB1,STAT3,SUCLA2,SUCLG1,SUCLG2,TGFBR3,TIMP1,TLR2,TLR7,TLR8,TNFRSF1B,TXN,UBD,VCAM1,VCAN,VEGFA,XBP1,YBX3 |
| IL13           | -0,264 | cytokine |           | 1,858  | 1,904  | 0,004 | 5,84E-23 | 1,01E-20 | ACADVL,ACKR3,ACOX1,ACSL1,ADA,ADAMDEC1,ALOX5AP,ARG2,ARNTL2,ATF3,AVPI1,BAX,BCL2A1,BID,BIRC2,BLVRA,BZW2,C3,CCAR1,CA2,CAPN2,CASP1,CASP3,CASP6,CASP8,CCL18,CCL20,CCL5,CCR5,CD14,CD163,CD1C,CD247,CD36,CD37,CD40,CD44,CD48,CD52,CD86,CHN2,CIDEB,CISH,CLEC10A,CLEC4A,CLEC7A,COL18A1,COL1A1,COL1A2,COL3A1,CTSB,CTSK,CTSS,CTSV,CXCL1,CXCL10,CXCL6,CXCR4,CYBB,DNASE2,DYNLT3,ENPP2,EVL,F3,FAS,FCGR2B,G0S2,GNAI2,GPNMB,GPX3,HK1,HPSE,HRH1,HTRA1,ICAM1,IDO1,IFNGR1,IFNGR2,IL13,IL13RA1,IL18,IL1R1,JAK1,KITLG,LILRB2,LIPA,MAF,MAOA,MCUR1,MMP1,MMP2,MMP9,MRC1,MS4A4A,MSMO1,MT1X,NOS2,PAPSS1,PDLIM2,PFKP,PLA2G4A,PLIN2,POSTN,PPARGC1A,PRSS8,PTGES,QSOX1,RFTN1,RHOA,RIN2,RORC,RYK,S100A8,SAMSN1,SELP,SERPINF1,SLA,SLC26A6,SLC43A3,SLC7A7,SLPI,SPINT2,SPP1,ST14,ST3GAL6,ST8SIA4,STXBP1,SWAP70,SYNGR2,TFEC,TFF3,TIMP1,TIMP2,TLR1,TLR4,TMC6,TNFRSF11B,TNFRSF1B,TNFSF10,TNFRSF17,TNFSF10,TNNI1,TP11,TRIM5,TSPAN7,TYROBP,VCAM1,VDR,VEGFA,YBP1,ZEB3                                                                                          |
| IL15           | 0,170  | cytokine | Activated | 3,471  | 3,526  | 0,006 | 2,16E-22 | 3,65E-20 | ACADS,AHR,ANXA1,AQP3,ARHGDI3,CALM1 (includes others),CAMK2G,CASP3,CCL18,CCL19,CCL5,CCND1,CCND2,CCND3,CCR2,CD2,CD38,CD40,CD44,CD53,CD55,CD59,CD69,CD74,CD83,CD84,CD86,CD8A,CDK2AP1,CDKN1B,CISH,CORO1A,CX3CR1,CXCL10,CXCL12,CXCR4,DARS2,DPP4,EBP,ELK3,ENO1,ENO3,EXOSC8,FAS,FBP1,FCGR3A/FCGR3B,FYB1,FYN,GARS1,GLDC,GNAS,GNLY,GZMB,GZMK,HK1,HNRNP,HPA8,ICAM2,IFI35,IFITM1,IL13,IL15,IL15RA,IL1R1,IL2RB,IL2RG,IL32,IL7R,IRF1,KLRB1,KLRD1,LCK,LYN,MACROH2A1,MAF,MCM5,MICB,MIF,MLLT3,MT1G,MX1,MYD88,NFKB1,NME1,NOS2,NUDT1,PAFAH1B3,PCBP2,PCNA,PDCD4,PDCD5,PDIA3,PDIA4,PFKFB2,PFKFB3,PFKL,PFKP,PFN1,PGAM2,PGM1,PIK3R3,PKM,PLA2G4A,PLD1,PLEK,PNP,PPARGC1A,PRDX4,PRF1,PSMB10,PSMB8,PSMB9,PTP4A1,PTP4A2,PTPRC,PYGL,RAB8A,RAC2,RBX1,RPIA,S100A11,S1PR1,SELL,SET,SLC16A3,SLC25A5,SMAD2,SMAD7,SOCS2,SRGN,SRSF7,TDFP2,TGFBR2,TIMP1,TJP1,TKT,TLR2,TNFRSF17,TNFSF10,TNNI1,TP11,TRIM5,TSPAN7,TYROBP,VCAM1,VDR,VEGFA,YBP1,ZEB3                                                                                                           |

|       |       |                                   |           |        |        |       |          |          |                                                                                                                                                                                                                                                                                                                                                                                                                                                                                                                                                                                                                                                                                                                                                                                                                                                                                                                                                                                                                                                                                                                                                                                                                                                                                                                                                                                                                                                                                             |
|-------|-------|-----------------------------------|-----------|--------|--------|-------|----------|----------|---------------------------------------------------------------------------------------------------------------------------------------------------------------------------------------------------------------------------------------------------------------------------------------------------------------------------------------------------------------------------------------------------------------------------------------------------------------------------------------------------------------------------------------------------------------------------------------------------------------------------------------------------------------------------------------------------------------------------------------------------------------------------------------------------------------------------------------------------------------------------------------------------------------------------------------------------------------------------------------------------------------------------------------------------------------------------------------------------------------------------------------------------------------------------------------------------------------------------------------------------------------------------------------------------------------------------------------------------------------------------------------------------------------------------------------------------------------------------------------------|
| FSH   |       | complex                           |           | -0,352 | -0,329 | 0,003 | 3,92E-22 | 6,50E-20 | <p>ACPF5,ACTB,ACTN1,ACTR2,ADAM17,ADAMTS1,ADCY7,ADCY9,ADGRG1,ADM,AHR,AKAP12,ALDH3A2,ALPL,AQP3,ARL4C,ARL6IP5,ATP9A,AXL,BAG1,BCL11A,BCL2L2,BNIP3L,CAMK2G,CAP2,CASP4,CND1,CCND2,CD55,CDK14,CDKN1C,CHUK,COL15A1,COL18A1,CPE,CRYM,CSNK1A1,CTSV,CXCR4,CYFIP2,CYP17A1,DAB2,DHCR7,DHRS3,DHX15,DNAJB9,DUSP1,DUSP3,DUSP9,ELL2,ENC1,ESR1,FDX1,FKBP5,FOS,FOSB,FOSL1,FOXO1,GBP1,GCLC,GK,GNAS,GNB1,GNLY,GOT1,GPER1,GRK5,GZMB,HSD3B2,ID1,IGFBP4,IL6R,ING2,INHA,ISG20,ITGA3,KITLG,LGALS1,MAP2K3,MAP4K4,MMP2,MMP9,MSMO1,MT1X,NPY1R,NR4A1,P4HA2,PCK1,PCNA,PGRMC1,PHKA2,PKM,PLCL1,PLIN3,PLK2,PPARA,PPIH,PRKD1,PRKX,PRLR,PRNP,PSIP1,PSMD1,PTEN,PTGS1,PTP4A1,PTPRE,PTPRF,RAB27A,RAB31,RAB5C,RASSF2,RGS7,RHOB,SGK1,SHBG,SMAD1,SMAD2,SMAD7,SMARCA4,SSTR2,STAT1,STK25,STX4,TFPI2,TGFBF2,TGFBF3,TIMP1,TIMP2,TMBIM6,TNFAIP6,TNFRSF11B,TOB1,TP53,TPM1,TUBA1A,TYRO3,VEGFA,VEGFC,WT1,YRY3,ZNF334</p>                                                                                                                                                                                                                                                                                                                                                                                                                                                                                                                                                                                                                      |
| NR3C1 | 0,164 | ligand-dependent nuclear receptor | Inhibited | -2,713 | -2,704 | 0,001 | 4,48E-22 | 7,29E-20 | <p>A2M,ACAT1,ACTB,ACTN1,ADM,ALOX5AP,ANXA1,APOE,APOL3,AQP1,ARID4B,ARPC2,AVP,B2M,BAG1,BAG3,BARD1,BAX,BCKDHA,BCL2L2,BCL6,BHLHE40,BIN1,BIRC2,BIRC3,BNIP3L,C1R,CACNA2D3,CAPN2,CASP4,CASP6,CAT,CAV1,CCL5,CCND1,CD38,CD47,CD69,CD83,CDKN1C,CGA,CIDEA,CKAP2,COMT,COQ8A,CORO1C,CUL1,CXCL10,CXCR4,CYP27A1,CYP2A6 (includes others),CYP2C8,CYP3A4,CYP3A7,DAPK2,DDC,DUSP1,DUSP22,DYLL1,EBAG9,ENC1,ENDOG,ETNK2,F2RL1,F3,FAM89B,FCER1G,FKBP4,FKBP5,FN1,FNTA,FOS,FOXO1,G6PC,GADD45A,GADD45B,GBP2,GCLM,GLIPR1,GLUL,GNMT,GPR65,GPX3,GSTA1,GSTP1,GZMA,HDAC1,HGD,HMGCS2,HSD11B2,ICAM1,IDH1,IFI6,IFIH1,IFIT2,IFT122,IL13,IL15,IL15RA,IL18,IL33,IL7R,ING2,INSR,IRF1,IRF8,ISG15,ITGA V,ITGB2,ITGB6,JUND,KAT5,KLF9,LHB,LTB,MAL,MALT1,MAOA,MMP1,MMP9,MSRB1,MTCH2,MTHFD1,MYD88,MZB1,NAMPT,NFIL3,NFKB1,NOD2,NOS2,NPPA,NR0B2,NR113,NSMAF,OAT,PAK2,PCK1,PDCD4,PEA15,PER1,PIGR,PIK3CB,PIK3R3,PLA2G4A,PLEKHF1,PLIN2,PLK2,PPARA,PPP1R15A,PRKACB,PRKCD,PRKCI,PRLR,PSMA6,PSMG2,PTEN,PTP4A2,RAB11A,RABGGTB,RB1,RHOB,ROCK1,SERINC3,SERPINA6,SERPINB9,SGK1,SGPL1,SGPP1,SH3GLB1,SLC10A2,SLC19A2,SLC2A5,SLC38A1,SMAD1,SOX4,SPP1,SRD5A2,STAT3,STK17B,STK39,STUB1,TAC1,THAP1,TIPARP,TLR1,TLR2,TLR5,TNFAIP2,TNFAIP6,TNFAIP8,TNFRSF11B,TNFRSF1B,TNFRSF21,TP53,TP53BP2,TRAF5,TRIB3,TRIM45,TXN,UGCG,UNC13B,VCAM1,VDR,WD</p>                                                                                                                                                                                                             |
| APP   | 0,254 | other                             | Activated | 2,168  | 2,207  | 0,003 | 1,03E-21 | 1,65E-19 | <p>ABCG1,ABCG2,ACO2,ACTB,ACTG1,AIFM1,ALB,ANXA5,APOE,ARC,ARF4,ARL6IP5,ATOX1,ATP1A3,ATP5F1D,ATP6V0D1,ATP6V1E1,AXL,BACE1,BASP1,BAX,BCL2L2,C1QB,C1R,C1S,C3,CALB1,CALML3,CALML4,CALR,CAP1,CAPN1,CASP3,CAST,CAT,CCDC25,CC120,CCL5,CCND1,CCND2,CCR5,CD151,CD40,CD44,CD59,CD69,CD74,CD86,CDH3,CDH5,CDK1,CDK5,CLDN1,CLIC1,CLTB,CLU,COL18A1,CPNE6,CRABP1,CRYL1,CRYM,CSF1R,CSF2RB,CTSB,CTSD,CTSV,CXCL1,CXCL10,CXCL12,CXCL6,CXCR4,CYBB,CYFIP1,CYFIP2,DXN1,DCN,DDAH1,DDX58,DNM1L,DPYSL2,DSTN,ECH1,ENG,ENO1,ENP2,ERMP1,ESR1,EVL,EXT1,F2RL1,FAM49A,FCGR2B,FLNA,FN1,FOLR1,FOS,FOSB,FUZ,FYN,GALK1,GBP2,GHR,GNB1,GOT2,GPM6B,GSTP1,HDAC1,HECW1,HERC6,HK1,HLA-E,HSPA5,HSPA8,ICAM1,ICAM2,IDO1,IFI16,IFI35,IFIH1,IFIT2,IL13,IL15,IL18,IL7,INSR,IRF1,IRF7,ISG20,ITGA2,ITGA3,ITGAL,ITGAM,ITGB3,ITPR3,JUND,KIF2A,KL,KNB1,KYNU,LHFPL2,LPAR6,LRP5,MAF,MAFB,MAFF,MAPT,MDK,MEF2C,MGAT3,MME,MMP1,MMP2,MMP9,MR C1,MTOR,MXI1,MYD88,NAMPT,NARS2,NDUFB11,NDUFS4,NDUFS8,NFKB1,NME1,NOS2,NRP1,PDCC4,PDGFRA,PDK2,PEA15,PEBP1,PFKFB3,PFKP,PITX3,PJA1,PKM,POU2AF1,PRDX2,PRKCA,PRLR,PRMT1,PRNP,PSME1,PTDSS1,PTPRC,PVALB,QDPR,RASSF2,RCAN1,RHOA,RNASEL,ROCK1,RSAD2,RTP4,S100A8,S1PR1,SERPINF1,SET,SH3GL2,SHC1,SLAMF8,SLC13A3,SLIT2,SMAD7,SMARCA4,SOD1,SOD2,SSRP1,ST3GAL5,ST6GAL1,ST8SIA4,STAT3,STMN1,STUB1,STXB1,SUCLG1,TERT,TGFBF2,THY1,TJP1,TLR2,TLR3,TLR4,TLR5,TLR7,TLR8,TNFAIP2,TNFSF10,TP53,TP53BP2,TOR3A,TP53,TPD52L1,TPI1,TPM1,TRIB3,TRIM21,TUBA1A,TUBA1B,TUBB,TUBB2A,TUBB4B,TUBB6,TUFM,TXN,UCHL1,VAMP2,VCAM1,VCAN,VEGFA,</p> |

|       |        |                                   |        |        |        |          |          |                                                                                                                                                                                                                                                                                                                                                                                                                                                                                                                                                                                                                                                                                                                                                                                                                                                                                                                         |
|-------|--------|-----------------------------------|--------|--------|--------|----------|----------|-------------------------------------------------------------------------------------------------------------------------------------------------------------------------------------------------------------------------------------------------------------------------------------------------------------------------------------------------------------------------------------------------------------------------------------------------------------------------------------------------------------------------------------------------------------------------------------------------------------------------------------------------------------------------------------------------------------------------------------------------------------------------------------------------------------------------------------------------------------------------------------------------------------------------|
| OGA   | 0,160  | enzyme                            | 0,717  | 0,706  | -0,001 | 1,30E-21 | 2,04E-19 | ACADM,ACO2,ACTG1,ADGRL2,AIFM1,ALOX5AP,APOBEC3G,APOE,ARAF,ARHGAP29,ASS1,AZGP1,BAX,BCL2L13,BNIP2,C1QA,C1QB,C1RL,C3AR1,C6orf15,CACNA2D3,CALB1,CALCRL,CAPN1,CASP1,CAV1,CCL20,CCND1,CCR5,CD14,CD151,CD24,CD36,CD40,CD44,CD47,CD48,CD53,CD55,CD86,CD93,CDH15,CDK10,CDK5,CDKN2C,CLDN1,COLEC11,CPE,CRABP1,CREB5,CSF1R,CSF2RB,CX3CR1,CXCL6,CYFIP2,CYP2B6,DAB2,DCLK1,DHCR7,DLST,DPEP1,EFNB2,ELF1,ERBB3,FAS,FBP1,FERMT2,FGF13,FLNA,FN1,FSCN1,FZD6,GADD45A,GADD45G,GALK2,GALNT6,GALNT7,GLI3,GLUL,GPER1,GPR21,GTf2IRD1,HPGD,HPGDS,IFIT3,IFNGR2,IGBP1,IGFBP4,IGFBP7,IL18,IL6R,ITGA2,JAK1,KRT81,LAMB1,LPXN,MCAM,MICALL2,MSMO1,NDUFA2,NDUFB11,NDUFS1,NDUFS4,NOTCH2,NPHS1,NSDHL,OGDH,PECR,PHKA2,PLA2G4A,PLAAT3,PLCE1,PLIN2,PLIN3,PRDX4,PRF1,PROM1,PYGL,RAB27A,RB1,RHOB,S100A2,S100A6,SERPINB9,SERPINE2,SIGIRR,SLC2A9,SLC33A1,SOCS2,ST14,STAT1,SUCLG2,TBP,TGFBI,TGFBR2,TGFBR3,TIMP1,TIMP2,TNC,TNFRSF11B,TDR3,TDR3BP4,TDRD51,4,TDRD14,VIM4 |
| STAT1 | 1,186  | transcription regulator           | 7,452  | 7,520  | 0,007  | 1,50E-21 | 2,31E-19 | A2M,ALDH1A3,APOBEC3B,APOBEC3G,APOE,AXL,B2M,BAX,BCL6,BST2,C1R,C1S,C3,CAPN1,CASP1,CASP3,CASP4,CASP6,CASP8,CCL19,CCL20,CCL5,CCND1,CCND2,CCND3,CCR7,CD14,CD40,CD86,CDKN1B,CFB,CLIC5,CTSS,CX3CR1,CXCL10,CXCL11,CXCL9,CYP2C8,CYP4A11,DDX60,DPP4,FAS,FCER1G,FCGR2B,FGF7,FGL2,FOS,FOXO1,GBP1,GBP2,GLS,HERC6,HIF1A,HLA-DQA1,HLA-E,HTRA1,ICAM1,IDO1,IFI16,IFI27,IFI30,IFI35,IFI44,IFI44L,IFI6,IFIH1,IFIT2,IFIT3,IFITM1,IFITM2,IL15,IL15RA,IL18,IL1R1,IRF1,IRF2,IRF7,IRF8,IRF9,ISG15,KCTD12,LCN2,LY96,MMP9,MUC1,MX1,NOS2,NOX4,NOX5,NPPA,OAS1,OAS2,OAS3,PCDH17,PECAM1,PLSCR1,PRF1,PSMB10,PSMB8,PSMB9,PSME1,RORC,RSAD2,RTP4,S100A10,SAMHD1,SERPINA3,SERPING1,SLAMF8,SLC2A2,SMAD2,SMAD7,SOAT1,SP110,STAT1,STAT3,TAP1,TAPBPL,TLR3,TLR4,TLR8,TNFSF10,TP53,TP53BP2,TRIM21,TRIM22,UBD,ULK1,WARS1,XAF1                                                                                                                                     |
| PGR   |        | ligand-dependent nuclear receptor | -0,677 | -0,616 | 0,006  | 2,68E-21 | 4,04E-19 | ABCG2,ACOX1,ACP5,ACSL1,ADAMTS1,ALDH1A3,BCL6,BIRC2,BIRC3,CAPN2,CCL8,CCNB1,CCNB2,CCND1,CCND3,CD36,CD44,CD59,CDK1,CDKN1B,CDKN1C,CGA,CKAP4,COMT,CPT2,CTSD,DDC,DPYSL2,DYNLL1,EIF5B,ELL2,ENC1,ESR1,ESRRA,F2RL1,F3,FAM49A,FAM89B,FKBP5,FN1,FOS,FOXO1,G6PC,GLS,GLUL,GOT1,GPER1,GRB10,HIF1A,HPCAL1,HPGD,HSD11B2,ICAM1,ID1,IFI27,IL1R1,KLF9,LHB,MAD2L1,MAP2K3,MAT2A,MUC1,NDRG1,NEDD9,NET1,NOP16,NQO2,NSUN5,OCEL1,OGG1,P4HA2,PCDH1,PCNA,PDLIM1,PFKFB3,PFKP,PGRMC1,PHF21A,PLK2,POSTN,PRKCH,PRLR,PRRX1,PTGES,PTP4A1,RASSF2,S100A6,S100A8,SDC1,SERPINA5,SGK1,SIK3,SLC31A2,SLC9A3R1,SPRY2,SRSF7,ST3GAL1,ST3GAL4,STAT1,STAT3,TGFBI,TIPARP,TM4SF1,TNC,TNFRSF21,TRAF5,UGCG,VCAN,VDR                                                                                                                                                                                                                                                       |
| FOXO1 | -0,278 | transcription regulator           | 0,050  | 0,096  | 0,004  | 6,84E-21 | 1,01E-18 | A2M,ACACA,ACSL5,ADIPOR1,AGXT,ALB,ALDOB,ANXA3,APOC3,APOM,ATP6V1D,BACH2,BANK1,BAX,BCL2A1,BCL2L13,BCL2L2,BID,BIRC3,BLNK,C1QA,CA2,CASP6,CASP8,CAT,CAV1,CCL20,CCN3,CNA2,CCNB1,CCNB2,CCND1,CCR7,CD36,CD40,CDH5,CDK1,CDKN1B,CDKN1C,CDKN2C,COL4A1,COL4A2,CPT2,CTSK,CTSV,CXCL10,DLGAP5,EFHD1,ELOVL6,ENPEP,FABP2,FAS,FBXO21,FN1,FOLR1,FOS,FOSB,FOXO1,FYN,G6PC,GABARAPL1,GADD45A,GADD45B,GPD1,GRHPR,GSTK1,GZMA,HIF1A,HPD,HSPA5,ICAM1,IGFBP7,IL10RB,IL15,IL18,IL1R1,IL7R,INSR,ITGA3,ITGAM,ITGAV,ITGB2,ITGB6,LCP2,LEMD3,LHB,MCM5,ME1,MFN1,MLXIPL,MMP1,MMP9,MRPL34,MRPL46,MRPS12,MRPS2,MRPS22,MRPS7,MTTP,MX11,MYL3,NAMPT,NDN,NDUFA7,NDUFAF1,NDUFAF4,OVOL1,PBK,PCK1,PCK2,PDK4,PIK3IP1,PKLR,PLSCR1,PNPLA2,PPARGC1A,PPP1R15A,PRC1,PRF1,PRKCD,PSMB6,PSMB8,PTEN,PTGS1,PTPRC,RIPOR2,RPIA,S1PR1,SCD,SELL,SFN,SGK1,SLC25A20,SLC25A24,SLC2A2,SOD2,SPRY2,SPTLC2,TD02,TKT,TNFSF10,TNNC1,TP53,TRIB3,TSPO,TXNIB,VCAM4                              |

|         |       |                         |           |        |        |        |          |          |                                                                                                                                                                                                                                                                                                                                                                                                                                                                                                                                                                                                                                                                                                                                                                                                                                                                                                                                                                                                                                                                                                                                                                                                                                                                                                                                                                                                                                                                                                                                                                                                                                                                                                                                                                                                                                                                                                                                                                                                                  |
|---------|-------|-------------------------|-----------|--------|--------|--------|----------|----------|------------------------------------------------------------------------------------------------------------------------------------------------------------------------------------------------------------------------------------------------------------------------------------------------------------------------------------------------------------------------------------------------------------------------------------------------------------------------------------------------------------------------------------------------------------------------------------------------------------------------------------------------------------------------------------------------------------------------------------------------------------------------------------------------------------------------------------------------------------------------------------------------------------------------------------------------------------------------------------------------------------------------------------------------------------------------------------------------------------------------------------------------------------------------------------------------------------------------------------------------------------------------------------------------------------------------------------------------------------------------------------------------------------------------------------------------------------------------------------------------------------------------------------------------------------------------------------------------------------------------------------------------------------------------------------------------------------------------------------------------------------------------------------------------------------------------------------------------------------------------------------------------------------------------------------------------------------------------------------------------------------------|
| SMARCA4 | 0,194 | transcription regulator | Activated | 3,689  | 3,783  | 0,008  | 7,97E-21 | 1,16E-18 | A2M,ACE,ACE2,ACSL5,ADGRG1,AFP,AGMAT,AGR2,AHNAK,AHR,AIM2,ALB,ALDH1A3,ALDH2,AP1S2,AP3M2,APOA1,APOBEC3G,APOL3,ARHGDI3,ARL4C,ASNS,ATP2B4,ATP6V1B1,AZGP1,BCL2A1,BIN1,BNIP3L,C1orf54,CASP1,CASP3,CCNA2,CCND1,CCR2,CD44,CD47,CD52,CD63,CD74,CDH11,CDKN1B,CKM,CLIC2,CLPX,COL1A1,COTL1,CTSB,CTSS,CXCR4,CYP3A4,DHRS9,DYNLT3,ECM2,EHF,ELOVL6,EMP3,ENO3,F3,FAS,FBP1,FCHSD2,FHL2,FKBP5,FN1,FOLR1,FOS,GADD45A,GADD45B,GADD45G,GBP1,GCAT,GCHF,GPLC,GMFG,GNAI3,GPR183,GSTO1,GSTP1,GYS1,H1-10,HBB,HCLS1,HCP5,HEPH,HEXB,HLA-B,HLA-C,HLA-DRA,HLA-E,HLA-F,HLA-J,HNF4A,HNMT,HPGD,HS3ST1,HY1,ICAM1,ICAM2,ID3,IFI16,IFI27,IFI30,IFITM1,IFITM2,IGFBP4,IGFBP7,IL13,IL15RA,IL7R,IRF1,ITGA3,ITGA7,ITGAV,KCNJ2,LGALS1,LPXN,LUM,MAFF,MAOB,MAPK13,MEF2C,MGP,MICB,MMP1,MMP2,MMP7,MUC1,MYB,MYL5,NAP1L3,NCALD,NR2F2,NRP1,PCDH1,PERP,PLEKHO1,PLIN2,PLS1,PSMB9,PTP4A1,PTP4A2,RAB27A,RAB38,RAC2,RBM4B,RBP1,ROCK1,RRM2,S100A2,S100A6,SEL1L3,SEMA3B,SERPINE2,SKAP2,SLC35G2,SLC43A3,SMARCA4,SNAPC2,SOCS2,SPP1,SPRY2,SRPX,ST3GAL1,ST6GALNAC4,ST7,SYK,TACSTD2,TAOK3,TAP1,TAPBP,TBX2,TCF4,THY1,TIMP2,TLR2,TNFAIP8,TNFSF10,TNNT2,TP53,TPK1,TPM1,TREM2,TRIM15,TSPAN13,TSPAN8,TUBB,UBD,VIM,WDR45,WIPF1,WT1                                                                                                                                                                                                                                                                                                                                                                                                                                                                                                                                                                                                                                                                                                                                                                                                                                                    |
| IFNL1   |       | cytokine                | Activated | 6,607  | 6,671  | 0,009  | 1,85E-20 | 2,57E-18 | ATF3,BST2,CCR7,CD40,CD83,CXCL10,CXCL11,CXCL9,DDX58,DDX60,GBP1,HERC6,HLA-B,HLA-C,IFI27,IFI35,IFI44,IFI44L,IFI6,IFIH1,IFIT2,IFIT3,IFIT5,IFITM1,IFITM2,IL13,IRF9,ISG15,ISG20,LAMP3,LGALS3BP,MX1,OAS1,OAS2,OAS3,PHF11,PLAAT4,PLSCR1,PSMB9,RSAD2,RTP4,SAMD9,SLC15A3,SP110,STAT1,TDRD7,TLR2,TMEM140,TRIM22,UBE2L6,XAF1                                                                                                                                                                                                                                                                                                                                                                                                                                                                                                                                                                                                                                                                                                                                                                                                                                                                                                                                                                                                                                                                                                                                                                                                                                                                                                                                                                                                                                                                                                                                                                                                                                                                                                 |
| lfnar   |       | group                   | Activated | 6,432  | 6,499  | 0,009  | 2,41E-20 | 3,29E-18 | AIM2,APOBEC3B,AXL,B2M,C3,CASP1,CCL5,CD40,CD74,CD86,CD8A,CXCL10,DDIT3,DDX58,FCER1A,FCER1G,GBP2,HLA-A,HLA-E,HLA-G,IDO1,IFI16,IFI35,IFIH1,IFIT2,IFIT3,IFNGR1,IL15,IRF1,IRF7,IRF8,IRF9,ISG15,ISG20,MMP9,MYD88,OAS1,OAS2,PSMB8,PSMB9,RSAD2,SPP1,STAT1,TAP1,TAP2,TAPBP,TLR2,TLR3,TLR7,TNFSF10,TRIM21,UBE2L6,VCAM1,XAF1                                                                                                                                                                                                                                                                                                                                                                                                                                                                                                                                                                                                                                                                                                                                                                                                                                                                                                                                                                                                                                                                                                                                                                                                                                                                                                                                                                                                                                                                                                                                                                                                                                                                                                 |
| PTEN    | 0,445 | phosphatase             |           | -0,588 | -0,592 | -0,000 | 2,49E-20 | 3,34E-18 | ACAA1,ACAA2,ACACA,ACO2,ACOX1,ACSL1,ADAMDEC1,ADM,AGFG1,AGPAT4,AKAP1,ALOX5AP,ANXA1,ARF4,ATF3,AURKA,BAX,C3,CA2,CA8,CALCRL,CCL5,CCNB1,CCNB2,CCND1,CCND3,CCR7,CD40,CD44,CD86,CDH5,CDK10,CDKN1B,CENPS,CENPS-CORT,CFD,COX8A,CST6,CTSB,CTSV,CTSZ,CX3CR1,CXCL10,CXCL11,CXCR4,CYP27A1,DENR,DHRS11,DLAT,DLD,DNPH1,DUSP1,EBP,ECI2,EED,EFNB2,EGF,EHHADH,ERBB3,ESR1,F3,FAS,FGF1,FGF7,FGFR3,FN3K,FOS,FOXO1,FZD6,G0S2,GALK1,GCAT,GMD5,GP162,GPX3,GSR,GSS,GTPBP6,GYS1,HADH,HADHA,HCLS1,HDDC2,HEXB,HIF1A,HLA-DMA,HOXA10,IDH3B,IDH3G,IDI1,IFI30,IFNGR2,IFRD1,IGFBP6,IL4R,INPP1,ISG15,ITPR3,JUND,KIAA0930,KRT19,LEPROT,LHPP,LRRFP1,MACROH2A1,MAD2L1,MAPK8,MAT2A,MCAM,MET,MME,MMP2,MMP9,MRC1,MTOR,NDRG1,NDUFC1,NDUFS3,NEU1,NFIL3,NFKB1,NKX2-5,NME1,NOS2,NPPA,NR2F2,NUDT1,P2RY14,PARP1,PCBP2,PCCD4,PECAM1,PECR,PFFKB3,PFFKL,PGM1,PHGDH,PINK1,PITX3,PKLR,PLOD1,PPARGC1A,PTEN,PTGS1,PTP4A2,PTPRC,PTPRF,PTPRK,PYGL,RAB38,RB1,RMI1,RRM1,SCD,SDC1,SDHB,SDHD,SELL,SEPHS2,SERINC3,SFRP1,SLC25A1,SLC35D1,SLC7A8,SMAD1,SMAD2,SMARCA4,SNRPF,SOAT1,SOX4,SPP1,SPRY2,SQOR,STARD8,STAT3,SUCLA2,SUCLG1,SUCLG2,SYK,TG,TGFBR2,TLE2,TNFRSF10D,TNFRSF11B,TNFSF10,TP53,TP53BP2,TRAM1,UBA7,UCLK1,VCAM1,VEGFA,VEGFB,VEGFC,VEGFD,VEGFE,VEGFG,VEGFG2,VEGFG3,VEGFG4,VEGFG5,VEGFG6,VEGFG7,VEGFG8,VEGFG9,VEGFG10,VEGFG11,VEGFG12,VEGFG13,VEGFG14,VEGFG15,VEGFG16,VEGFG17,VEGFG18,VEGFG19,VEGFG20,VEGFG21,VEGFG22,VEGFG23,VEGFG24,VEGFG25,VEGFG26,VEGFG27,VEGFG28,VEGFG29,VEGFG30,VEGFG31,VEGFG32,VEGFG33,VEGFG34,VEGFG35,VEGFG36,VEGFG37,VEGFG38,VEGFG39,VEGFG40,VEGFG41,VEGFG42,VEGFG43,VEGFG44,VEGFG45,VEGFG46,VEGFG47,VEGFG48,VEGFG49,VEGFG50,VEGFG51,VEGFG52,VEGFG53,VEGFG54,VEGFG55,VEGFG56,VEGFG57,VEGFG58,VEGFG59,VEGFG60,VEGFG61,VEGFG62,VEGFG63,VEGFG64,VEGFG65,VEGFG66,VEGFG67,VEGFG68,VEGFG69,VEGFG70,VEGFG71,VEGFG72,VEGFG73,VEGFG74,VEGFG75,VEGFG76,VEGFG77,VEGFG78,VEGFG79,VEGFG80,VEGFG81,VEGFG82,VEGFG83,VEGFG84,VEGFG85,VEGFG86,VEGFG87,VEGFG88,VEGFG89,VEGFG90,VEGFG91,VEGFG92,VEGFG93,VEGFG94,VEGFG95,VEGFG96,VEGFG97,VEGFG98,VEGFG99,VEGFG100 |

|                   |        |               |           |       |       |       |          |          |                                                                                                                                                                                                                                                                                                                                                                                                                                                                                                                                                                                                                                                                                                                                                                                                                                                                                                                                                                                                                                                                                                                                                |
|-------------------|--------|---------------|-----------|-------|-------|-------|----------|----------|------------------------------------------------------------------------------------------------------------------------------------------------------------------------------------------------------------------------------------------------------------------------------------------------------------------------------------------------------------------------------------------------------------------------------------------------------------------------------------------------------------------------------------------------------------------------------------------------------------------------------------------------------------------------------------------------------------------------------------------------------------------------------------------------------------------------------------------------------------------------------------------------------------------------------------------------------------------------------------------------------------------------------------------------------------------------------------------------------------------------------------------------|
| NFkB<br>(complex) |        | complex       | Activated | 4,683 | 4,781 | 0,009 | 3,11E-20 | 3,99E-18 | A2M,ABCG1,ACKR3,ADM,ADRA2A,AHR,ALDH1A3,ALDH1B1,ALDH7A1,APOE,AQP1,ATF3,BACE1,BAX,BCL11A,BCL2A1,BCL2L2,BID,BIRC2,BIRC3,BLVRA,C1R,C3,CALB1,CARD8,CASP4,CASP8,CBR3,CL20,CCL5,CCL8,CCNB1,CCNB2,CCND1,CCND2,CCNH,CCR2,CCR7,CD36,CD40,CD44,CD69,CD74,CD83,CD86,CD99,CDC25B,CDX2,CFB,CLU,COL18A1,COL1A2,CRADD,CST7,CTCF,CXCL1,CXCL10,CXCL11,CXCL12,CXCL6,CXCL9,CXCR4,CYBB,CYP3A4,DDIT3,DIO1,DOK5,EHF,ELL2,ERAP1,F2RL1,F3,FAS,FGF1,FN1,FOS,GOS2,GAD1,GADD45A,GADD45B,GBP2,GCH1,GCLC,GNAS,GRK5,GZMK,HDA6,HIF1A,HLA-A,HLA-DMB,HLA-F,HNF4A,HSPA9,ICAM1,IDO1,IFNA10,IFNAR2,IGKC,IL10RA,IL13,IL15,IL15RA,IL18,IL32,IL7R,IRF1,IRF7,ISG15,ITGAL,ITGAM,ITGAV,ITGB8,KRT19,KYNU,LCN2,LITAF,LSP1,LTB,MFHAS1,MMP1,MMP2,MMP9,MSH2,NAMPT,NCF2,NFKB1,NFKBIE,NGF,NOS2,NPPA,NUP62,PEA15,PECAM1,PLD1,PLK2,PPARA,PPM1D,PRKCD,PSMB9,PTGES,RFTN1,RNF19B,RRAS,RRAS2,RSAD2,SENP2,SERPINA3,SLC16A3,SLC22A4,SLC2A2,SLC2A5,SLC37A4,SLIT2,SLPI,SMAD7,SOAT1,SOD2,SPP1,STAT4,STK10,STX4,TAC1,TAP1,TAP2,TCF12,TDOT,TERC,TFEC,TFPI2,TIMP1,TIMP2,TLR2,TLR4,TNFAIP2,TNFAIP6,TNFAIP8,TNFRSF11B,TNFSF10,TOLLIP,TP53,TPMT,TRIB3,TRIM38,UBD,VCAM1,VEGFA,VEGFB,VEGFC,VIM,VTGAD,XPO6,ZEB2,ZEB3 |
| AGT               | -0,502 | growth factor | Activated | 3,586 | 3,644 | 0,005 | 4,56E-20 | 5,57E-18 | ACE,ACE2,ADAM17,ADD3,ADIPOR1,ADM,ANXA1,ANXA3,ARHGEP9,ASL,ATF3,AVP,BAX,CALR,CASP3,CASP8,CAT,CAV1,CCL5,CCL8,CCND1,CCND2,CCND3,CCR7,CD36,CD44,CD86,CDH5,CDK1,CDKN1B,COL1A1,COL1A2,COL3A1,COL4A1,CREB5,CTF1,CTSS,CXCL10,CYBA,CYBB,CYP17A1,CYP2J2,CYP4A11,DAB2,DUSP1,EBP,EFEMP1,EFNB2,ENG,F3,FBXO21,FDX1,FGF13,FGF7,FN1,FOS,FRAT2,GAS2,GCH1,GFPT1,GJA1,GRK5,GSS,GSTA3,GSTP1,HIF1A,HMGB2,HSD3B2,ICAM1,ID3,LDH1,LDH1,IGFBP4,IL13,IL15,IL18,INSR,ITGA2,ITGA7,ITGAV,ITGB3,KCNJ2,KITLG,KL,KRAS,LAMB1,LEPR,LZTS3,MAP2L1,MAPT,MIF,MMP1,MMP2,MMP9,MSMO1,MYB,NAMPT,NCALD,NCF2,NCL,NDRG1,NGF,NOS2,NOX4,NOX5,NPHS1,NPPA,NPR3,NR4A1,OXT,PALLD,PARP1,PECAM1,PFN1,POSTN,PPARGC1A,PPF1BP1,PPP1R3C,PSMB10,PSMB8,PTEN,PTGS1,RAC1,RCAN1,RHOA,RRAS,SELL,SGK1,SHC1,SLC1A1,SLC5A2,SMAD7,SOD2,SOX4,SPP1,TBX2,TGFBR2,TIMP1,TJP1,TLN2,TNFRSF1B,TP53,TXNIP,UCP2,VEGFA,VEGFB,VEGFC,VIM,ZEB2,ZEB3                                                                                                                                                                                                                                                                              |
| CD3               |        | complex       | Activated | 3,004 | 3,089 | 0,007 | 4,56E-20 | 5,57E-18 | ACADS,ACTR3,AHR,ANG,ANXA1,AQP3,ARHGDI1,BCL2A1,BCL6,BIRC3,BST2,C1R,C2,CALM1 (includes others),CAMK2A,CASP3,CASP6,CASP8,CCL18,CCL20,CCL5,CCND1,CCND2,CCND3,CCNH,CCR2,CCR5,CD2,CD247,CD27,CD44,CD53,CD69,CD74,CD83,CD86,CD8A,CDK1,CDK2AP1,CDKN1B,CISH,CLCN1,CORO1A,CXCL10,CXCR4,CYBA,CYC1,DOCK2,DPP4,DUSP22,EBP,EIF4A3,ELK3,EXOSC8,FAS,FCER1G,FKBP3,FOS,FTL,FYB1,FYN,GBP1,GLDC,GNAS,GTF2IRD1,GTPBP4,GUCY1B1,GYS1,GZMA,GZMB,GZMK,HAX1,HIF1A,HLA-DQB1,HNRNPF,HNRNPR,HSP90B1,HSPA5,HSPA8,ICAM1,ICAM2,IFI35,IFITM1,IFNGR1,IFRD2,IGFBP6,IL10RB,IL13,IL15RA,IL1R1,IL2RB,IL2RG,IL32,IL4R,IL7R,IRF1,IRF8,IRF9,JAK1,LCK,LCP1,LONP1,LSP1,LYN,MACROH2A1,MAF,MAP3K10,MCM5,MDH2,MMP2,MT1G,MTHFD2,NAMPT,NASP,NCL,NFE2L2,NFKB1,NIT1,NME1,NOS2,NR4A1,NUDT1,OGDH,ORA13,P4HB,PAFAH1B3,PCBP2,PCNA,PCYOX1,PCYT2,PDCC5,PDIA4,PFN1,PHB,PKLR,PLA2R1,PLEK,PLIN2,PNP,PRDX4,PRF1,PSMA6,PTEN,PTP4A1,PTP4A2,PTPRC,PYGL,RAB8A,AC2,RARS1,RB1,RHOH,RNF128,RORA,RORC,RPL35A,RXRA,RYK,S100A11,SHC1,SLC25A5,SLPI,SNRPB,SOC2,SRGN,SRSF7,STAT1,STMN1,TFDP2,TFEC,TFPI2,THY1,TLR2,TNFSF10,TOM1L1,TP2A,TPST1,TRA2A,TRAF5,TRIM24,TRIM5,TSPAN7,TSTA3,TTF1,UQC                              |

|         |        |                                   |           |        |        |       |          |          |                                                                                                                                                                                                                                                                                                                                                                                                                                                                                                                                                                                                                                                                                                                                                                                                                                                                                                                                                                                   |
|---------|--------|-----------------------------------|-----------|--------|--------|-------|----------|----------|-----------------------------------------------------------------------------------------------------------------------------------------------------------------------------------------------------------------------------------------------------------------------------------------------------------------------------------------------------------------------------------------------------------------------------------------------------------------------------------------------------------------------------------------------------------------------------------------------------------------------------------------------------------------------------------------------------------------------------------------------------------------------------------------------------------------------------------------------------------------------------------------------------------------------------------------------------------------------------------|
| HGF     |        | growth factor                     | Activated | 2,403  | 2,479  | 0,007 | 4,61E-20 | 5,57E-18 | A2M,ABCC6,ABCG2,ACKR3,ADAMTS1,ADGRG1,ADGRL2,AFP,AH R,AIFM1,AKAP12,ARPC5,ASNS,ATF3,AURKA,BCL2A1,BIRC2,BIRC3,CALCRL,CALM1 (includes others),CASP1,CASP8,CAV1,CCL5,CCND1,CCNG1,CD40,CD44,CD93,CDC25B,CDK1,CDKN1B,CDKN2C,CDKN3,CGRRF1,COL1A1,COL1A2,COL3A1,COL4A1,COPB1,CSE1L,CTSK,CXCR4,CYP17A1,CYP2B6,DDIT3,DHPS,DOK5,DTYMK,DYNLL1,EBP,EFNB2,EHF,ESM1,F3,FANCG,FGF7,FKBP5,FLNA,FN1,FOS,FOSB,FOSL1,G6PC,GAK,GP SM2,GRB10,GRK5,GUCY1B1,HK1,ICAM1,ID1,IGFBP4,IL13,IL15RA,INPPL1,IRF8,ISG15,ISG20,ITGA2,ITGB8,ITPR3,KIF22,KITLG,KRT19,LCN2,LY75,MAD2L1,MAP2K3,MAT2A,MCM2,MCM5,MELK,MET,MID1,MMP1,MMP2,MMP9,MPC1,NAB2,NAMPT,NDC80,NFKB1,NID2,NOS2,NR0B2,NR4A1,NR4A3,NRP1,OSMR,PCK1,PCNA,PEMT,PEX5,PHB,PIK3CB,PLA2R1,PLOD1,PMP22,PRC1,PTGS1,PTPRF,PTTG1,RAC1,RFC2,RHOB,RIN1,S100A9,SFRP1,SGK1,SLC19A2,SLC2A2,SLC9A3R1,SNRNP70,SOD2,SPP1,SPRY2,ST14,STAB1,STK10,TACSTD2,TAGLN2,TGFBR2,TIMP1,TJP1,TNFAIP2,TNFAIP6,TPBP1,TP53,TPX2,TTK,UBE2C,VCAM1,VDR,VEGFA,VEGFC,VIM,WT1, <del>VCAM1</del> |
| PPARG   | 0,055  | ligand-dependent nuclear receptor | Inhibited | -4,127 | -4,097 | 0,003 | 5,03E-20 | 5,96E-18 | ABCG1,ABCG2,ACAA1,ACAA2,ACACA,ACADL,ACADM,ACADS,ACOT8,ACOX1,ACSL1,ACSL5,ADRB2,AGPAT2,ALDH9A1,APOA1,APOE,AQP3,ASAP1,ATP6V1D,BACE1,BAX,BCL6,BIN1,C3,CA2,CAT,CAV1,CAV2,CCL5,CCND1,CCR7,CD36,CD40,CDKN2C,CFD,CIDEA,CO L1A1,COL1A2,CPT2,CRAT,CTPS1,CXCL1,CXCL14,CXCL6,CYBA,CYP4A11,DGAT1,DHRS3,DLAT,EHHADH,ELOVL6,EPHX1,ESRRA,FBP1,FABP2,FGF1,FN1,FOSL1,G6PC,GAK,GPD1,GPT,GSTA1,HADH A,HMGCS2,HR,ICAM1,IDH1,IGFBP6,IGFBP7,IHH,IL13,IL33,INSR,IV D,KRT19,LHPP,LOC102724788/PRODH,MCM7,MCTP1,ME1,MLYCD,MMP9,MRC1,MTOR,MTTP,MUC1,MUC13,MYD88,NDRG1,NFE2L2,NOS2,NOX4,NPPA,NR1H2,NR1H3,NR2F2,NR4A1,NSF,OXR1,PC,PCK1,PCK2,PCNA,PCTP,PDK4,PEA15,PECAM1,PEPD,PFKFB3,PLIN2,PMM1,PMVK,PPARA,PPARGC1A,PPIC,PTEN,PTGES,PTPRF,PYGL,RHOB,RORC,S100A8,SAP18,SCD,SCP2,SDC1,SGK1,SHBG,SLC25A20,SLC27A3,SLC2A2,SNCG,SOD1,SPP1,TBXAS1,TCF4,TGFB R2,TJP1,TKT,TLR4,TNFSF10,TP53,TRIB3,TUBB,UCP2,VAMP2,VAM <del>DEVCAM1VDRVEGFAVIMVLDLIPWIDE1VWUAE</del>                                                     |
| FOXO3   | -0,006 | transcription regulator           | Inhibited | -3,148 | -3,135 | 0,002 | 5,08E-20 | 5,96E-18 | AGFG1,AHR,ALDH3A1,ANXA1,ANXA3,AURKA,BAX,BCL2L13,BCL6,BNIP2,BNIP3,BNIP3L,C1QA,CASP4,CASP8,CAT,CAV1,CCNB1,CCNB2,CCND1,CCND2,CCND3,CDH5,CDKN1B,CDKN1C,CDKN3,CEP55,CLDN1,COL4A1,COL4A2,CTSB,CTSV,CXCL10,CXCR4,DDIT3,DLGAP5,DNM1L,DOK5,ENPEP,ESR1,FN1,FOS,FOSB,FOXO1,FOXO4,FYN,GABARAPL1,GABRR2,GADD45A,GADD45B,GCLC,GLUL,GYP A,HIF1A,HMGCS2,HTATIP2,ICAM1,IFIH1,IGFBP7,IL10RB,IL13,IL1R1,IMPDH2,ITGAM,ITGB2,JAK1,LCN2,LCP2,LEMD3,MCAM,MCM2,MCM7,MEF2C,MET,MMP9,MTHFD2,MX1,NAMPT,NDRG1,NOS2,OPTN,O VOL1,PBK,PCNA,PECAM1,PIK3IP1,PPARGC1A,PPP1R15A,PRDX3,PRKCD,PRNP,PTEN,PTGS1,PTPRC,PTTG1,RTN3,SELL,SGK1,SH2B3,SH3GLB1,SLIT2,SOD1,SOD2,SPAG5,SPTLC2,TNFRSF1B,TNFSF10,TP53,TPX2,TXN2,TXNIP,TXNRD2,UBE2C,UCP2,ULK1,VCAM1, <del>VEGFAVIMZWINT</del>                                                                                                                                                                                                                                       |
| Insulin |        | group                             |           | 0,942  | 0,972  | 0,003 | 5,83E-20 | 6,75E-18 | ACACA,ACADM,ACAT1,ACOX1,ACSL1,ACTB,ADAM10,ADIPOR1,AE BP1,ALB,ALDOB,APOA1,APOE,APOM,ARG2,ATF3,ATP5F1D,ATP5MC2,AVP,BACE1,CCND1,CCND3,CCT2,CCT5,CCT6A,CD36,CDKN1B,CDX2,CIDEA,COL1A1,COL1A2,COL3A1,COL4A1,COL5A1,COX6A2,CSHL1,CTH,CXCL1,CYBB,CYP17A1,DEFB1,DUSP1,ELOVL6,ETFA,FKBP8,FN1,FOS,FOSB,FOXO1,FTL,G6PC,GCLC,GRB10,GRK2,GSTP1,HIF1A,HNF1A,HPSE,HSD3B2,HSP90B1,HSPA5,HSPA8,HSPA9,ICAM1,IDH1,IFIT2,IFIT3,IGFBP4,INSR,IRF7,ITGA3,ITGB3,LAMB1,LEPR,LGALS3BP,LONP1,LPIN1,MAOA,MAOB,MAPT,MCM6,MCM7,MDH2,ME1,MLXIPL,MMP2,MMP9,MTCH2,MTOR,MTTP,NDUFS1,NDUFS2,NDUFV1,NFE2L1,NFIL3,NOS2,NR1H3,NR4A1,NR4A3,NUCB2,P4HB,PCCB,PCK1,PCNA,PDGFRA,PDK2,PDK4,PFKFB3,PKM,PLAAT3,PLIN3,PNPLA2,PPARA,PPARGC1A,PPIB,PPIC,PPP1R15A,PRKCA,PRKCD,PRKCZ,PTEN,RAC1,RETSAT,RPS16,SCD,SDHB,SGK1,SLC10A2,SLC25A11,SLC25A5,SLC29A1,SLC2A2,SLC2A5,SLC2A8,SLC37A4,SLC38A3,SLC39A14,SLC5A2,SMAD7,SOD1,STAT1,STAT3,TGFB1,THBS2,TJP1,TLR2,TNC,TRPV1,UCP2,UQCRC1,UQCRC2, <del>VEGFAVLDLIPYBB1</del>                 |

|        |        |                                   |           |        |        |        |          |          |                                                                                                                                                                                                                                                                                                                                                                                                                                                                                                                                                                                                                                                                                                                                                                                                                                                                                                                                                                                                                                     |
|--------|--------|-----------------------------------|-----------|--------|--------|--------|----------|----------|-------------------------------------------------------------------------------------------------------------------------------------------------------------------------------------------------------------------------------------------------------------------------------------------------------------------------------------------------------------------------------------------------------------------------------------------------------------------------------------------------------------------------------------------------------------------------------------------------------------------------------------------------------------------------------------------------------------------------------------------------------------------------------------------------------------------------------------------------------------------------------------------------------------------------------------------------------------------------------------------------------------------------------------|
| RXRA   | -0,422 | ligand-dependent nuclear receptor | Inhibited | -3,631 | -3,616 | 0,002  | 6,66E-20 | 7,60E-18 | ABCC2,ABCC3,ABCG1,ABCG2,ACACA,ACACB,ACADM,ACOX1,ACSL1,ADH1B,AHCY,ANGPTL3,APOA1,APOC3,APOE,APOM,ARG2,ARL4C,ASNS,BAAT,C1QA,C3,CALB1,CAT,CCL20,CCNA2,CCNB1,CCND1,CCND3,CD36,CD38,CEBPE,CLMN,COL1A1,COLEC12,CPT2,CSHL1,CTSB,CTSS,CXCL10,CYP27B1,CYP2B6,CYP3A4,CYP4A11,EHHADH,ENG,EPHX1,FABP1,FABP2,FLRT3,FOS,FSTL1,FTL,GCLC,GPD1,GPT,HADHA,HCK,HIF1A,HMGCS2,HNF1B,HNF4A,HOXA1,HOXB1,IGFBP6,IL13,KLF9,KNG1,LCN2,LTF,LYZ,MAOB,MGP,MLXIPL,MLYCD,MMP2,MYL7,NEDD9,NME1,NPPA,NR0B2,NR1H3,PC,PCK1,PCK2,PKLR,PLD1,PLTP,PMP22,PPARA,RARG,RBP1,RGR,RORA,RORC,RXRA,S100A4,S100A8,SCD,SDC1,SEMA4D,SLC10A2,SLC27A5,SLC2A2,SLC34A1,SPP1,STRA6,TXN,VCAN,VDR,VEGFA                                                                                                                                                                                                                                                                                                                                                                                      |
| SP1    | 0,037  | transcription regulator           |           | 1,256  | 1,337  | 0,009  | 8,33E-20 | 9,39E-18 | ABCC8,ACSL1,ADA,ADAMTS1,ADD3,ADH5,AEBP1,AKAP12,ALDH3A2,ALOX5,ALPL,ANKH,APOA1,APOC3,APOE,ASNS,ASS1,ATF3,B4GALT5,BACE1,BAX,BMP7,BNIP3L,C1QBP,CASP3,CAT,CAV1,CCL20,CCL5,CCNA2,CCND1,CCND2,CCND3,CD40,CD55,CD59,CD99,CD25B,CDK1,CDKN1B,CDKN2C,CIRBP,COL1A1,COL1A2,CRYBB3,CTH,CTSD,CXCL10,CXCL12,CXCR4,CYBRD1,CYC1,CYP17A1,CYP1B1,CYP2B6,ENG,ESR1,ESRRA,F3,FAS,FDX1,FLNA,FN1,FOLR2,FOS,FOSL1,FYN,GHR,GJA1,GNAI2,GNAS,GSS,HADHA,HBB,HDAC1,HIF1A,HNF4A,HPSE,HSD11B2,HSPA5,ICAM1,IFNNGR1,IGFBP4,IL15,IL2RB,IL4R,INSR,IRF1,ITGA2,ITGAM,ITGAV,ITGB3,JAM2,KRT19,KRT4,KRT81,LHB,LIPA,LTB,LTBP3,MAOA,MAOB,MAT2A,MET,MMP1,MMP2,MMP9,MRC1,MSH6,NAB2,NCF2,NDRG1,NFKB1,NOX4,NOX5,NPPA,OGG1,PARP1,PCK1,PDGFRA,PEMT,PKM,PLA2G4A,PRKCA,PRKCD,PRLR,PRNP,PROCR,PROM1,PSIP1,PTDSS1,PTGS1,PTH1R,PTTG1,RB1,RECK,RRAS,SELL,SERPINE2,SGK1,SIGIRR,SLC22A4,SLC25A5,SLC31A1,SLC9A3,SMAD7,SMPD1,SNCG,SOAT1,SOD1,SOD2,SPARC,SPP1,STAT1,STAT3,TERT,TFPI2,TGFBR2,TGFBR3,THRHRB,TIMP1,TIMP2,TLR2,TNC,TNFSF10,TNNC1,TP53,TSPO,TUG1,UGCG,VDR,VEGFA,VIM,WNT10B,ZEB2       |
| ifn    |        | group                             | Activated | 5,245  | 5,293  | 0,007  | 1,12E-19 | 1,25E-17 | ADAMTS1,APOBEC3A,B2M,BAG1,BCL6,CASP8,CD40,CD44,CD58,CD69,CD83,CD86,CFH,CXCL10,CXCL11,CYP4A11,DDX58,FAS,FOSL1,HIF1A,HLA-A,ICAM1,IDO1,IFI16,IFIH1,IFITM1,IL10RA,IL15,IL15RA,IL1R1,IL32,IL33,IL7,IRF1,IRF7,IRF8,ISG15,ISG20,LCN2,MMP9,MX1,NOS2,NTRK2,OAS2,OAS3,PECAM1,PLAAT4,RNASEL,RSAD2,S100A8,SECTM1,SPP1,STAT1,TAP1,TLR1,TLR2,TLR3,TLR5,TLR7,TP53,TRIM21,TRIM22                                                                                                                                                                                                                                                                                                                                                                                                                                                                                                                                                                                                                                                                    |
| FOS    | -1,302 | transcription regulator           |           | 0,080  | 0,103  | 0,003  | 1,21E-19 | 1,33E-17 | A2M,ABCC1,ACACA,ACOX1,ACTG1,ADNP,AGPS,ALDH1A3,ANXA4,AQP3,ARPC5,ASAP1,ASL,ATF3,ATF7IP,C3AR1,CA2,CALU,CAPN2,CASP3,CAST,CAT,CCL20,CCL5,CCNA2,CCND1,CCNG1,CD14,CD164,CD44,CELF2,CGA,CLU,COL16A1,COL18A1,COL1A1,CRABP1,CSTA,CTH,CTSB,CTSV,CYP17A1,CYP2J2,DAPK2,DNMT1,EIF4G2,ELOVL6,ENAH,ENO1,EPHX2,ESM1,EVX1,F3,FBN1,FEZ2,FN1,FOLR2,FOS,FOSB,FOSL1,FRZB,FSTL1,FZD5,FZD6,G6PC,GAK,GAS2,GJA1,GM2A,GPER1,GPSM2,GSR,GSTP1,HDAC6,HIPK3,HLA-B,HOXA1,HPGD,HPGDS,HSD17B10,HSD3B2,HSP90B1,HSPA5,HSPB8,HTATIP2,ICAM1,IGFBP6,KIF2A,KITLG,LETMD1,LGALS3BP,LHB,LTBP3,MAOA,MAP4K4,MCM5,MET,MMP1,MMP2,MMP7,MMP9,MPZL2,MYH9,NAE1,NCF2,NDUFS7,NET1,NFE2L2,NFIL3,NGF,NIPSPA1,NPLOC4,NPPA,NR1H3,NR4A1,NSDHL,PAOX,PCYT2,PFN1,PGAM2,PIK3CB,PLA2G4A,PLD1,PLK2,PTH1R,PTP4A1,PTP4A2,PTPN12,PTPRD,PTTG1,RARG,RBBP7,RBP1,RFNG,RPS24,RXRA,S100A10,S100A8,S100A9,SAP18,SCD,SDC1,SELENBP1,SEMA3B,SEMA4D,SERPINE2,SERPINE2,SLC10A2,SLPI,SMAD7,SNCG,SNN,SPP1,STMN1,SULT2B1,SWAP70,TAC1,TGFBI,TIMP1,TIPARP,TNFRSF11B,TP53,TUBB,TXN,UGCG,UTRN,VCAM1,VEGFA,VIM,WNT10B,XAF1 |
| MAP4K4 | 0,499  | kinase                            | Activated | 5,840  | 5,768  | -0,009 | 1,24E-19 | 1,34E-17 | ACAA2,ACACA,ACACB,ACADS,ACADVL,ACO2,ACSL5,AGPAT3,ALDH3B1,ALDH4A1,ARAF,AUH,BCKDHB,CHPT1,COQ3,COX11,CYC1,DHODH,DLAT,DLA,DLST,GCDH,GLUL,GOT1,GRHPR,GYS1,HADH,HADHA,HMGCL,HYAL2,IMPDH1,IVD,MAFB,MLXIPL,MPI,NDUFA3,NDUFB1,NDUFB7,NDUFS1,NDUFS4,NDUFS8,NDUFV1,NT5M,OGDH,PEX19,PEX3,PGM1,PHYH,PLA2G12A,PLCB4,PMM1,PNPLA3,PON2,PTDSS2,PTGES,PXMP2,SCD,SCP2,ST3GAL4,SUCLG1,UQCRC1                                                                                                                                                                                                                                                                                                                                                                                                                                                                                                                                                                                                                                                            |



|                     |        |                                 |           |       |       |          |          |                                                                                                                                                                                                                                                                                                                                                                                                                                                                                                                                                                                                                                                                                                                                                                                                                                                                                                                                                                                                          |                                                                                                                                                                                                                                                                                                                                                                                                                                                                                                                                                                                                                                                                                                                                                                                                                                                                                                                                                                   |
|---------------------|--------|---------------------------------|-----------|-------|-------|----------|----------|----------------------------------------------------------------------------------------------------------------------------------------------------------------------------------------------------------------------------------------------------------------------------------------------------------------------------------------------------------------------------------------------------------------------------------------------------------------------------------------------------------------------------------------------------------------------------------------------------------------------------------------------------------------------------------------------------------------------------------------------------------------------------------------------------------------------------------------------------------------------------------------------------------------------------------------------------------------------------------------------------------|-------------------------------------------------------------------------------------------------------------------------------------------------------------------------------------------------------------------------------------------------------------------------------------------------------------------------------------------------------------------------------------------------------------------------------------------------------------------------------------------------------------------------------------------------------------------------------------------------------------------------------------------------------------------------------------------------------------------------------------------------------------------------------------------------------------------------------------------------------------------------------------------------------------------------------------------------------------------|
| TCR                 |        | complex                         | 0,220     | 0,274 | 0,006 | 1,99E-19 | 2,13E-17 | ADM,AIM2,AK2,APOA4,APOC3,APOE,BACH2,BCL2A1,BIN1,BIRC3,CARD8,CCL5,CCND1,CCND3,CCR2,CCR5,CCR7,CD200,CD27,CD38,CD44,CD69,CDKN1B,CISH,CTSB,CXCL10,CXCL11,CXCL9,CXCR4,CYTIP,DDX58,ECH1,ELL2,ENO1,FAS,FLNA,FOS,FYN,GADD45B,GADD45G,GLUD1,GLUD2,GNPDA1,GZMA,GZMB,HADH,HIF1A,HSD17B10,HSP90B1,HSPA5,HSPA9,ID3,IFI44,IFI44L,IFI6,IFIH1,IFIT2,IFIT3,IFNGR1,IL13,IL4R,IL7,IL7R,IRF1,IRF7,ISG15,ISG20,KCNK5,LAT,LR,LCK,LCP2,LIME1,LIPA,LMNB1,MAF,MAPK8,MDH2,MX1,MX2,MYD88,NAB2,NDUFA10,NFKB1,NME1,NR4A1,NRP1,OAS1,P4HB,PDCC4,PDIA4,PHB,PIK3R3,PRF1,PRKACB,PRMT1,PTEN,PTPRC,RASGRP1,RNF128,RPL13A,RPL3,RPS16,RPS3,RSAD2,SDCBP,SELL,SERPINA3,SLC1A5,SLC25A3,SMAD7,SOCS2,SPP1,STAT1,STAT3,STAT4,TLR3,TLR4,TLR7,TNFRSF1B,TOB1,TPI1,TRAF5,TSC22D1,TUFM1,UCR3,VAI1,VDR,ZRTR7                                                                                                                                                                                                                                               |                                                                                                                                                                                                                                                                                                                                                                                                                                                                                                                                                                                                                                                                                                                                                                                                                                                                                                                                                                   |
| EGF                 | -1,786 | growth factor                   | 1,813     | 1,885 | 0,006 | 5,08E-19 | 5,17E-17 | ABCG2,ACTN1,ADA,ADAM17,AFP,APOA1,AQP3,ARC,ATF3,AURKA,B4GALT5,BIRC2,CASP1,CASP3,CAV1,CCL20,CCNB1,CCND1,CCND2,CCND3,CD44,CDH11,CDK1,CDK5,CDKN1B,CDX2,CEBPE,CGA,CISH,CLCN3,CLDN3,CLU,COL1A1,COL1A2,COL3A1,CSF1R,CTCF,CTSD,CXCL14,CXCL6,CXCR4,CYP2B6,DCN,DDIT3,DPP4,DUSP1,EFNB2,ENAH,ESR1,F3,FAM89B,FN1,FOS,FOSB,FOSL1,FSTL1,FUT3,GAB2,GADD45A,GAK,GAL3ST1,GDF2,GFPT1,GJA1,GPER1,GPS2,GSTP1,HIF1A,HNF4A,HOXB5,HPGD,HSD3B2,ICAM1,ID1,ID2,IDH1,IDI1,IGFBP4,IL1R1,IL7R,ITGA2,ITGAM,ITGB3,JUND,KRAS,KRT19,LCN2,LTF,MAD2L1,MET,MMP1,MMP2,MMP9,MUC1,NCL,NFE2L1,NGF,NOS2,NPPA,NR4A1,NR4A3,NRP1,PBK,PCNA,PDCD4,PKK4,PTG1,PLSCR1,PPIB,PRKCH,PROM1,PSMB5,PSMB6,PSMB7,PTGES,PTGS1,PTPN12,PTTG1,RAC1,RHOA,RHOB,RRM1,RRM2,RXRA,S100A10,S100A11,S100A4,S100A9,SCD,SDC1,SERPINA3,SH2B3,SHC1,SLC37A1,SMAD1,SOX4,SPARC,SPP1,SPRY2,ST3GAL1,ST3GAL4,STAT1,TBP,TERT,TFPI2,TGFBR2,TIMP1,TJP1,TM4SF5,TNC,TP53,TUFM,ULK1,VAMP2,VCAM1,VCAN,VDR,VEGFA,VEGFC,VIL1,VIM,ZFP726                                                           |                                                                                                                                                                                                                                                                                                                                                                                                                                                                                                                                                                                                                                                                                                                                                                                                                                                                                                                                                                   |
| Vegf                |        | group                           | Activated | 2,786 | 2,875 | 0,007    | 5,36E-19 | 5,40E-17                                                                                                                                                                                                                                                                                                                                                                                                                                                                                                                                                                                                                                                                                                                                                                                                                                                                                                                                                                                                 | A2M,ACE,ACKR3,ADAM10,ADAMTS1,ADGRG1,ADGRL2,AHR,AKAP12,ALOX5AP,APOM,ARHGEF17,ASNS,ATF3,AURKA,BAX,BCL2A1,BMP7,CA2,CALB1,CALCRL,CALM1 (includes others),CASP1,CASP3,CASP8,CD40,CD44,CD93,CDC25B,CDH5,CDK1,CDKN2C,CDKN3,CLDN1,CPA3,CRABP1,CSE1L,CSGALNACT1,CXCL1,CXCL10,CXCL11,CXCL12,CXCR4,CYP4A11,DDIT3,DENND2,D,DHPS,DNAJB9,DOK5,DTYMK,EBP,EFNB2,EHF,EIF2B2,ENPP2,ERBB3,ESM1,F3,FANCG,FAS,FKBP5,FLNA,FN1,FOSB,FOSL1,GASK1B,GPSM2,GRB10,GRK5,GUCY1B1,HIF1A,HMGCS2,HOPX,HPSE,ICAM1,ID1,IGFBP4,IHH,IL15RA,IL18,IL1R1,IRF1,ISG20,ITGA2,ITGB8,ITPR3,JAM2,KIF22,KITLG,LCN2,LPAR1,LPAR6,LY75,LYN,MAD2L1,MAOB,MAP2K3,MCM2,MCM5,MEF2C,MELK,MET,MGP,MGST2,MID1,MIF,MMP2,MMP9,MPC1,MT1G,NAB2,NAMPT,NDC80,NFKB1,NID2,NPL,NR2F2,NR4A1,NR4A3,NRP1,OSMR,P2RY14,PC,PEMT,PEX5,PIK3CB,PLOD2,PMP22,PRC1,RAC1,RCAN1,RECK,SFN,SFRP1,SGK1,SLC19A2,SOCS2,ST8SIA4,STAT3,STK10,TACSTD2,TGFBR2,TIMP1,TJP1,TLR3,TNC,TNFRSF11B,TPST1,TPX2,TRAF5,TTK,UBE2C,UCR3,VAI1,VCAM1,VEGFA,VEGFC,VIM,VME1 |
| dihydrotestosterone |        | chemical - endogenous mammalian | 0,237     | 0,285 | 0,005 | 2,17E-18 | 2,06E-16 | ABCG1,ACACA,ACADVL,ACKR3,ACO2,ACTB,ADAMTS1,ADM,ALDH1A3,APOE,APOM,AQP1,AVP,AZGP1,B2M,BASP1,BAX,C1orf116,CASP1,CASP3,CASP8,CCNA2,CCNB1,CCND1,CCND2,CCND3,CCT3,CD36,CD63,CD74,CDKN1B,CGA,CKM,CLU,COL3A1,COL4A1,COL5A2,CST6,CYBB,CYP17A1,CYP4A11,DCN,DCTPP1,DPP4,DTL,DYNLL1,EGF,ENO1,ESR1,FAM89B,FGF7,FKBP4,FKBP5,FN1,FOS,FOXO1,FTL,FZD6,G0S2,GHR,GLUL,GNMT,GPD1,GPX3,GPX5,GRB10,GRN,GSTP1,HLA-A,HPGD,HPGDS,HSD11B2,HSD3B2,ID2,IGFBP4,IGFBP7,INSR,IQGAP2,ITGA2,KLK1,KRT19,LAMA5,LGALS1,LHB,LYZ,MAF,MAFF,MCAM,MCM5,ME1,MME,MMP1,MMP2,MMP7,MMP9,MUC1,NAT1,NDRG1,NEDD4L,NID2,NOS2,NR4A1,NUCB1,OXT,PC,PCK1,PDCD4,PEA15,PER1,PFN1,PHB,PHF21A,PHGDH,POSTN,PPARA,PRNP,RAB27A,RARG,RB1,RGN,RHOB,RPL28,RPL3,RPL8,RPLP2,RPS20,RPS24,SCD,SCP2,SDC3,SELENBP1,SERPINE2,SGK1,SHC1,SLC16A7,SLC19A2,SLC1A3,SLC1A5,SLC25A16,SLC2A5,SLC2A9,SLC3A2,SLC4A4,SLC7A7,SLC7A8,SLC7A9,SLCO3A1,SPARC,SPP1,SRD5A2,SSRP1,STARD8,STXBP1,TACC2,TERT,TGFBR2,TGFBR3,TIMP2,TKT,TMPRSS2,TNFSF10,TP53,UAP1,VCAM1,VCAN,VEGFA,VIM,VLDLR,WIF4,YTIP2 |                                                                                                                                                                                                                                                                                                                                                                                                                                                                                                                                                                                                                                                                                                                                                                                                                                                                                                                                                                   |

|                |       |                         |           |        |        |       |          |          |                                                                                                                                                                                                                                                                                                                                                                                                                                                                                                                                                                                                                                                                                                                                                                                                                                               |
|----------------|-------|-------------------------|-----------|--------|--------|-------|----------|----------|-----------------------------------------------------------------------------------------------------------------------------------------------------------------------------------------------------------------------------------------------------------------------------------------------------------------------------------------------------------------------------------------------------------------------------------------------------------------------------------------------------------------------------------------------------------------------------------------------------------------------------------------------------------------------------------------------------------------------------------------------------------------------------------------------------------------------------------------------|
| IL10           |       | cytokine                |           | 0,044  | 0,054  | 0,001 | 6,60E-18 | 6,20E-16 | ADM,ALOX5AP,ARAP2,ARG2,ARNT2,BAX,BCL2A1,CASP3,CASP8,CCL18,CCL19,CCL20,CCL5,CCND2,CCND3,CCR2,CCR5,CCR7,CD14,CD163,CD2,CD40,CD44,CD55,CD83,CD86,CDKN1B,CHUK,CLEC7A,COL1A1,CSF1R,CSF2RB,CTSB,CTSS,CTS2,CX3CR1,CXCL10,CXCL11,CXCL12,CXCL6,CXCL9,CXCR4,DCN,DEPP1,DUSP1,EHF,F3,FAAH,FAS,FCER1G,FCGR2B,FCGR3A/FCGR3B,FKBP5,FOS,FPR1,GZMA,GZMB,HLA-G,HPGD,HTATIP2,ICAM1,IDO1,IFIT2,IGFBP4,IL10RA,IL13,IL18,IL1R1,IL33,IL4R,IL7,IL7R,INPP5D,IRAK1,IRF1,ITGAL,ITGAM,KITLG,KLRD1,LAMP3,LGALS1,LILRB2,LTB,LY75,MAF,MMP1,MMP2,MMP9,MRC1,MUC1,MYD88,NEDD9,NOD2,NOS2,NPHS1,NR4A3,PHGDH,PSMB9,RARRES1,S100A8,SELL,SLC1A3,STAT1,STAT3,STAT4,TAP1,TAP2,TERT,TIMP1,TLR2,TLR3,TLR4,TLR5,TLR7,TLR8,TNFRSF17,TNFRSF1B,TNFSF10,TUBB4B,VCAM1,VCAN,VEGFA,VTGN1,ZFP36                                                                                                   |
| IL3            |       | cytokine                |           | 0,593  | 0,641  | 0,007 | 6,76E-18 | 6,28E-16 | ACOX1,ADA,ADGRE5,AKR1A1,ALDH2,ALOX5AP,ARHGAP29,ARHGDI3,BIRC3,BNIP3L,C1QA,CALR,CASP3,CAT,CBFB,CCL19,CCN3,CCND1,CCND2,CCND3,CCNG1,CCT5,CD14,CD247,CD3D,CD3G,CD40,CD48,CD53,CD63,CD69,CD83,CD86,CDKN1B,CISH,CRAT,CSF1R,CSNK1A1,CXCL9,CXCR4,DDIT3,DHPS,ECH1,EMP3,FAS,FCER1A,FCGR2B,FKBP3,FOS,FUS,GADD45A,GADD45B,GADD45G,GNAS,GPR21,GZMA,HK1,HLA-A,HNF1A,HNF4A,HSP90B1,HSPA5,HSPA9,ICAM1,IK,IL13,IL33,IMP2,ITGAM,ITGAV,ITGB3,JCHAIN,KLF9,KPNB1,LAMP3,LCN2,LY75,LYN,MAN2B1,MCM5,MID1,MLF2,MMP1,NCL,NEDD9,NRP1,PFKL,PHGDH,PLA2G7,PSMB7,PSME1,RARS1,RB1,RIDA,RPL3,RPS16,RPS19,RPS20,RPS3,SELL,SERPINA3,SLC3A2,SNRPD2,SOD1,SOX4,STAT4,STT3A,TARS1,TERT,TLR2,TLR4,TNFSF10,TYK2,UCP2,VCAM1,VEGFA,WNK1,YRP1                                                                                                                                              |
| Growth hormone |       | group                   | Inhibited | -2,154 | -2,123 | 0,004 | 7,03E-18 | 6,46E-16 | ACAA1,ACACA,ACSL1,ACTB,ADRB2,AKR1A1,AKR1B1,ALB,APOE,ATP5MC2,BCL6,BMP7,BPHL,C3,CALB1,CAT,CCND1,CCND2,CD36,CDH3,CISH,CLDN15,CLU,COL18A1,COL1A1,COL3A1,COMT,CSHL1,CTH,CYP27B1,CYP2C8,CYP3A4,DDIT3,DDR1,DECR1,DYRK2,FGFR3,FKBP5,FN1,FOS,FZD5,G6PC,GCDH,GCLC,GHR,GLUD1,GPT,GSTA1,GSTP1,HADH,HBB,HOXA1,ID1,IGFBP6,INSR,IRF1,LEPR,MP9,NAMPT,NEDD9,NOX4,NPPA,NR2F6,PCK1,PCNA,PDK4,PFKFB3,PIK3C2B,PLAAT3,PLK2,PPARA,PPP1R15A,PRDX3,PRKAG2,PRLR,RAB3A,SGK1,SLC7A9,SOCS2,SOD1,SPP1,SST,TFF3,TGFB2,TKT,TNFSF10,TSC2,TD1,TIIRA1A,TXNIP,ZFR2                                                                                                                                                                                                                                                                                                                |
| NFE2L2         | 0,255 | transcription regulator |           | -1,188 | -1,114 | 0,007 | 1,08E-17 | 9,86E-16 | ABCC1,ABCC2,ABCC3,ABCG2,ACSL5,ACTG1,AGPAT3,AHR,AKR1A1,AKR7A2,ALDH3A1,ANG,AOX1,APOA4,ATF3,BHMT,BNIP3,CA11,CALB1,CAT,CCL5,CCT3,CD36,CD86,CDKN2C,CFD,CLPP,COL1A1,COL3A1,COL4A2,CTSD,CTSK,CUL1,CXCL10,CXCL6,CYBB,DDIT3,DDX50,DHCR7,DNAJB5,DSTN,DYNLL1,EIF4G2,ENTPD5,EPHX1,FBP1,FGF13,FKBP5,FMO1,FN1,FTL,GADD45G,GAS2,GCLC,GCLM,GHR,GNA11,GNAI2,GPX3,GSR,GSS,GSTA1,GSTA3,GSTM4,GSTO1,GSTP1,HAX1,HNF1A,HPRT1,HSP90B1,HSPA9,HTATIP2,IDH1,IFNGR2,IFRD1,IL13,IMPDH1,MAFF,MAPK10,ME1,MEF2C,MMP9,MORF4L2,MSMO1,NAT8B,NCF2,NFE2L1,NFE2L2,NOCT,NOS2,NROB2,NR1I3,NSMF,NUCB2,OAT,OSGIN1,PDIA3,PDIA4,PDIA6,PHGDH,PLIN2,PARGC1A,PPIB,PSAT1,PSMA4,PSMA6,PSMB5,PSMB6,PSMD1,RACK1,RARS1,RBBP7,RPS16,S100A13,SERINC3,SERPINA3,SERPINA6,SHC1,SHMT2,SLC1A1,SLC35B1,SLC38A1,SLC38A3,SLC7A8,SOD1,SOD2,SRGN,TBXAS1,TCN2,TKT,TP53,TPI1,TXN,UBQLN2,USP14,VCAM1,VEGFA,YRP1 |
| Lh             |       | complex                 |           | -1,168 | -1,152 | 0,003 | 1,18E-17 | 1,06E-15 | ACP5,ACTB,ACTN1,ACTR2,ADAMTS1,ADCY7,ADCY9,ADGRG1,AKAP12,ALPL,ARL4C,ARL6IP5,ATP9A,AXL,BAG1,BNIP3L,CAMK2G,CAP2,CASP4,CCND2,CD55,CDK14,CDK5,CDKN1C,CHUK,COL15A1,COL18A1,CSNK1A1,CXCR4,CYFIP2,CYP17A1,DAB2,DHCR7,DHRS3,DUSP1,DUSP3,DUSP9,FDX1,FKBP5,FOS,GBP1,GJA1,GK,GNAS,GNB1,GNLY,GRK5,HSD3B2,INHA,ITGA3,MAP2K3,MAP4K4,MMP2,MP9,MSMO1,P4HA2,PER1,PGRMC1,PHB,PHKA2,PLCL1,PLIN3,PPIH,PRKD1,PRKX,PSIP1,PSMD1,PTGS1,PTP4A1,PTPRE,PTPRF,RAB27A,RAB31,RAB5C,RGS7,RHOB,SGK1,SLIT2,SMARCA4,SOD2,SRD5A2,STAT1,STK25,TFPI2,THBS2,TMBIM6,TNFAIP6,TNFRSF11B,TP53,TPM1,TIIRA1A,TYRO3,VEGFA,VEGFC,YRX3                                                                                                                                                                                                                                                        |
| IRF1           | 0,758 | transcription regulator | Activated | 6,314  | 6,372  | 0,007 | 1,29E-17 | 1,14E-15 | B2M,BAX,C1R,CASP1,CASP3,CASP8,CCL19,CCL20,CCL5,CCNB1,CCND1,CD40,CFB,CTSS,CXCL10,CXCL11,CYBB,DDX58,EIF4A3,ERAP1,FGL2,GBP2,HLA-G,IDO1,IFI27,IFI35,IFI44L,IFI6,IFIH1,IFIT2,IFIT3,IFIT5,IFITM1,IL13,IL15,IL18,IL7,IRF1,IRF2,IRF7,IRF9,ISG15,LTB,MAP4K4,MMP9,MX1,MYB,NOS2,OAS1,OAS2,PCNA,PIGR,PLAAT3,PLAAT4,PSMB10,PSMB8,PSMB9,PSME1,RSAD2,SELL,SLPI,SOCS7,SP110,STAT1,STAT3,TAP1,TAP2,TAPBP,TERT,TLR3,TNFSF10,TP53,TRIM21,TRIM22,UBD,VCAM1,XAF1                                                                                                                                                                                                                                                                                                                                                                                                   |

|        |       |                         |           |        |        |       |          |          |                                                                                                                                                                                                                                                                                                                                                                                                                                                                                                                                                                                                                                                                                                                                                                                                                         |
|--------|-------|-------------------------|-----------|--------|--------|-------|----------|----------|-------------------------------------------------------------------------------------------------------------------------------------------------------------------------------------------------------------------------------------------------------------------------------------------------------------------------------------------------------------------------------------------------------------------------------------------------------------------------------------------------------------------------------------------------------------------------------------------------------------------------------------------------------------------------------------------------------------------------------------------------------------------------------------------------------------------------|
| RELA   |       | transcription regulator | Activated | 4,000  | 4,063  | 0,007 | 2,10E-17 | 1,81E-15 | A2M,ABC2G2,AFP,AHR,AHX5AP,APOE,ARHGDB,B2M,BACE1,BAC H2,BAX,BCL2A1,BHLHE40,BIRC2,BIRC3,BLVRA,BNIP3L,C3,CARD8 ,CASP3,CASP8,CAV1,CCL19,CCL20,CCL5,CCND1,CCR7,CD14,CD 40,CD44,CD59,CD69,CDKN1B,CFB,COL1A1,COL1A2,CTCF,CTSB, CXCL1,CXCL10,CXCL11,CXCL6,CXCL9,CXCR4,CYBB,CYP17A1,CY P2B6,CYP3A4,DDIT3,DUSP1,EHF,ELMO1,ERAP1,F3,FAS,FCGR2,F N1,FOS,FOSB,FSCN1,GBP1,GCH1,GRK5,GSTA1,HIF1A,HLA- B,HNF4A,HSP90B1,ICAM1,ID1,IFNGR2,IGHM,IGKC,IL13,IL15RA,IL3 2,IL7R,IRF1,IRF7,ISG15,LTB,LUM,LYN,MAT2A,MIF,MMP1,MMP9,MU C1,MYB,NAMPT,NFE2L2,NFKB1,NFKBIE,NMI,NOD2,NOS2,NOX5,N R113,NR4A1,NR4A3,OAS2,PCK1,PECAM1,PKM,PLD1,POU2AF1,PP M1D,PRKCD,PSMB10,PSMB9,PTEN,PTGES,PTPN6,RORC,S100A6, SELP,SERPINE2,SHBG,SLC2A5,SMAD7,SOD2,TAC1,TAP1,TAP2,T APBP,TERT,TFPI2,THOC1,TLR2,TNFAIP2,TNFRSF11B,TP53,TPMT, UBD,VCAM1,VEGFA,VIM,WT1      |
| HIF1A  | 0,653 | transcription regulator |           | 1,427  | 1,498  | 0,007 | 7,92E-17 | 6,57E-15 | ABCC8,ACO1,ADAM10,ADAM17,ADAMTS1,ADM,AFP,AKAP12,ALO X5AP,APOE,ARPC2,ASNS,AURKA,AXL,BACE1,BACH2,BAX,BHLHE 40,BHLHE41,BID,BIRC2,BNIP3,BNIP3L,CAV1,CCL5,CCN3,CCND1,C CR2,CCR5,CCR7,CD164,CD24,CD36,CD44,CD47,CD48,CDKN1B,CLDN 1,CORO1A,CTPS1,CTSD,CXCL12,CXCR4,CYBB,CYP46A1,EEB,E NG,ENO1,ESRRG,FHL1,FHL2,FN1,FOS,FSCN1,FYN,FZD2,GADD45 B,GCHFR,GHR,GJA1,GLYR1,GPER1,H2BC12,HIF1A,HMGCL,HSPA 5,ID1,ID2,IL15,ITGAV,ITGB2,ITGB3,KITLG,KLHL20,KRT19,LGALS1, MAFF,MANF,MEF2C,MET,MIF,MMP1,MMP2,MMP7,MMP9,MUC1,NA E1,NDRG1,NOS2,NOX4,NPPA,NR4A1,NR4A3,NTRK2,P4HA1,P4HA 2,PFKFB3,PFKL,PKM,PLAC8,PLOD2,PPARA,PRKCA,PROM1,PTEN, RAPGEF6,RIOK3,RORC,SFRP1,SIRT2,SLC16A3,SLC16A4,SLC29A 1,SMAD7,SOD2,ST3GAL1,STAT3,STC2,TAC1,TCF4,TERT,TLR2,TM EM45A,TNFAIP2,TNFRSF11B,TP53,TP11,TRIM21,TXN,VCAM1,VEG FA,VEGFC,VIM,WNT10B,WT1,ZNF267 |
| EGFR   |       | kinase                  |           | 1,160  | 1,207  | 0,004 | 1,09E-16 | 8,91E-15 | ABC2G2,ACOT7,ACTB,ANXA1,BAX,BCL6,BZW2,CAPZA2,CASP3,CA SP4,CAV1,CCL5,CCNA2,CCND1,CCT5,CD47,CD48,CD49,CDKN1 B,COL1A1,COL3A1,COL5A2,CRMP1,CTSK,CUL1,CXCL10,CXCL12, CXCL14,CXCR4,DDIT3,DSG2,DUSP1,EFNB2,EGF,EIF6,ERBB3,ESR 1,F2RL1,F3,FBN1,FGF7,FKBP11,FOS,FOSL1,GADD45A,GBP1,GHR, GJA1,GRN,GZMB,HIF1A,HMGB3,HSD11B2,HSP90B1,HSPA5,ICAM1 ,ID1,IGBP1,IGFBP4,IL33,IL36A,IQGAP2,IRF1,ITGA2,JUND,KPNB1,L CN2,MACF1,MARCKS,MET,MME,MMP1,MMP2,MMP9,MT1F,MTHFD 1,MUC1,MX1,NCL,NOS2,NPPA,NSF,OSMR,PCNA,PKM,PLA2G4A,P OSTN,PRF1,PRKCZ,PROM1,PRORP,PSMB5,PSMB6,PSMB7,PTEN, PTGES,PTGS1,PTPRE,QTRT1,RB1,RBBP7,RHOB,RRAS,S100A2,S DF2L1,SDHB,SERPINA3,SERPINE2,SFRP1,SLC25A3,SLPI,SPRY2 ,STAT3,TBXAS1,TIMM10,TM4SF5,TNC,TNFAIP6,TNFRSF11B,TPST 1,TTF1,TUBB4B,TUBG1,TXNIP,UQCRC2,VCAN,VDR,VEGFA,VIM,W NT10B,ZFP2                         |
| IL10RA | 1,302 | transmembrane receptor  | Inhibited | -2,510 | -2,507 | 0,000 | 1,31E-16 | 1,06E-14 | ABAT,ABCG1,ACSL1,ACSM3,ADD3,ADGR2,ALDH2,ALDOB,AOX 5,ANKH,AOC1,ARG2,ARL5A,ASS1,BAX,BNIP3,C3,CA2,CCL5,CCN3, CCR7,CD1D,CD36,CD40,CD69,CFB,CLCN7,CST7,CTH,CYFIP2,DC N,DPEP1,DRAM1,EFEMP1,EGF,EHF,ENTPD5,FAS,FBN1,FHL1,FN1 ,FOLR2,FSTL1,GBP2,GHR,GPR171,GPR18,HAO2,HLA- A,HPGD,HPSE,HSPA8,IFI16,IL15RA,IL2RG,IRF1,IRF7,ITGAM,KITLG ,LCN2,LUM,MAOB,MECOM,MECR,MMP25,MSRB1,MYB,NAMPT,NO S2,NPL,NR1H3,PCK1,PCOLCE,PDGFRA,PLAAT3,PMP22,POSTN,P PARGC1A,PPT2,PROCR,PSMB8,PSMB9,PYGL,RSAD2,S1PR1,SAM HD1,SECTM1,SELENBP1,SELL,SERPINB9,SLAMF8,SLC16A3,SOR BS2,SPARC,SPON1,ST3GAL6,STARD8,STAT1,STAT3,SUCLG2,SU I T1C2,TAC1,TAP1,TAP2,TFEC,THRS4,TIR2,WFDN2                                                                                                                                                                         |
| STAT6  |       | transcription regulator |           | -1,345 | -1,329 | 0,002 | 2,12E-16 | 1,69E-14 | ACOX1,ACP5,ACSL1,ALDH2,ANXA1,APOE,APOLD1,ARNTL2,ASS1, AUH,BAX,BCL6,CASP6,CCL20,CCL5,CCL8,CCND2,CCR5,CCR7,CD 2,CD38,CD40,CD69,CDKN1B,CEL,CIDEB,CIDEC,CISH,CLPS,COL1 A1,COL1A2,CRADD,CRIP1,CST7,CTNS,CTSB,CTSS,CXCL10,CYBB ,CYP4A11,DDAH1,DOCK10,EPHX1,EXT1,FABP1,FAM49A,FCER1G, FCGR3A/FCGR3B,FKBP5,FSCN1,GADD45B,GADD45G,GALK2,GAT M,GBP2,GPM6B,HCK,HLA-DMA,HLA- DMB,HMGCS2,HRH1,IFI16,IFI44,IFIH1,IFIT3,IFNAR2,IL10RA,IL13,IL1 5,IL33,IL4R,IRF1,IRF7,IRF9,ISG15,ISG20,KCTD12,KMO,LCP2,LGAL S3BP,LTB,LY75,MAF,MMP2,MMP9,MYB,NEDD9,NFIL3,OAS3,PKD4, PLD1,PLSCR1,PNPLA2,POLE2,POU2AF1,PPARA,PPARGC1A,PRK CA,PRNP,RNF19B,S100A10,SAMSN1,SELENBP1,SELP,SERPINF1, SOCS2,SOX13,ST6GAL1,STAT4,STK39,SYK,SYNGR2,TBC1D17,TE S,TFEC,TFE3,THY1,TIMP1,TLE1,UBL3,USP2,VCAM1,VIM,XBP1,ZFP 36                                          |

|        |        |                         |        |        |       |          |          |                                                                                                                                                                                                                                                                                                                                                                                                                                                                                                                                                                                                                                                                                                                                                                                                                                                        |
|--------|--------|-------------------------|--------|--------|-------|----------|----------|--------------------------------------------------------------------------------------------------------------------------------------------------------------------------------------------------------------------------------------------------------------------------------------------------------------------------------------------------------------------------------------------------------------------------------------------------------------------------------------------------------------------------------------------------------------------------------------------------------------------------------------------------------------------------------------------------------------------------------------------------------------------------------------------------------------------------------------------------------|
| MTOR   | -0,241 | kinase                  | -0,084 | -0,059 | 0,003 | 2,40E-16 | 1,90E-14 | ACACA,ACACB,ACADL,ACADM,ACOX1,ADM,AIFM1,AKR1A1,AKR1B1,ALDH1A3,ARL4C,BNIP3,CASP1,CASP3,CASP8,CCND1,CCND3,CCR7,CD40,CD86,CPT2,CRADD,CSF1R,CTCF,CXCL1,CXCR4,CYP17A1,DDIT3,DEFB1,ENO1,ETFA,FGFR3,FN1,GLUD1,GPHN,GSTZ1,HADHA,HIF1A,HK1,HMGCS2,HSP90B1,IFI16,IL13,IL1R1,IL2RB,IL4R,INHA,IQSEC2,IRAK1,IRF1,IRF8,MAPT,MDH2,MLXIPL,MLYCD,MMP9,MTOR,MUC1,NAB2,NFKBIL1,NOS2,NOX4,OAS1,PCNA,PKC2,PKC3,PKC4,PECAM1,PFKFB2,PFKP,PFN1,PGRMC1,PKM,PPARA,PPARGC1A,PPIB,PRKCZ,PRX,PSMB5,PTEN,PTH1R,PTPN6,PYGB,RHOA,RORC,RPL23,S1PR1,SELL,SERPINB1,SGCA,SLC12A2,SLC16A3,SMPD1,SNCG,SND1,SOAT1,SOD1,SOX4,SRPX,ST6GAL1,STAT1,STAT3,TCF4,TLR4,TLR5,TMPRSS2,TNFRSF11B,TNFSF10,TP53,TXNIP1,UBE2R,UBE2C,UBCR2,UBTRN,VCAM1,VEGFA                                                                                                                                                 |
| TCF3   |        | transcription regulator | 1,972  | 2,007  | 0,005 | 2,84E-16 | 2,18E-14 | ABCC8,ACACB,ADA,ARAF,ARSA,ATF3,AURKA,AZGP1,BACH2,BCL6,BID,BLNK,CA2,CASP3,CASP6,CCNA2,CCNB1,CCNB2,CCND2,CCND3,CCS,CD2,CD55,CDC25B,CDH5,CDK1,CDKN2C,CDKN3,CEP55,CKAP4,CKM,COL1A1,CRELD2,CSF1R,CTSV,DKK,DDX58,DSSTN,EA2,ECT2,FGFR3,FKBP11,FOXO1,GADD45A,GADD45B,GIMAP4,GM2A,GYPB,HADHA,HMGB2,HS3ST1,HSD17B14,HSP90B1,ID2,ID3,IFI16,IGHM,IL7R,JUND,KLHDC2,MAD2L1,MAL,MANF,MEF2C,MORF4L2,MOMO1,MZB1,NDC80,NDN,NEIL1,NELL1,NFIL3,NPPA,NR0B2,NR4A3,NTRK2,OPTN,PAFAH1B3,PARP8,PDIA4,PDIA6,PFKP,PLAC8,POU2AF1,PRC1,PRDX2,PRDX4,PRSS3,PTDSS1,PTGS1,PTPRCAP,RIPOR2,RORA,RORC,RRM2,SCN4A,SDF2L1,SEC24D,SELL,SERPINB1,SLC12A2,SLC35B1,SMAGP,SUB1,SULT2B1,TAPBPL,TMEM184R,TOP2A,TOX,TRAF5,TTK,XRP1,ZFP2                                                                                                                                                              |
| ERK1/2 |        | group                   | 0,537  | 0,595  | 0,006 | 3,06E-16 | 2,33E-14 | ABCC6,ALOX5,AOC1,ATP1A3,AVP,B2M,BAX,BCL2A1,BHMT,BIRC2,BIRC3,C3,CALR,CAT,CAV1,CCL20,CCL5,CCL8,CCND1,CCND2,CCR7,CD40,CD44,CD86,CDK1,CDKN1B,COL1A1,COL3A1,CTSB,CTSV,CXCL1,CXCL10,CXCL12,CXCL6,CXCR4,CYBB,CYP17A1,CYP46A1,DDIT3,DUSP1,EFNB2,ENO1,ESR1,F3,FKBP5,FN1,FOS,FOSB,FOSL1,FOXO1,GAD1,GJA1,GRK5,HIF1A,HLA-A,HPGD,HSPA5,ICAM1,ID1,ID3,ITGA2,ITGA3,ITGB3,JUND,KIF2A,LEPR,MAP3K10,MAPT,MMP1,MMP2,MMP9,NAMPT,NKX2-5,NOS2,NOX4,NPPA,NR4A3,PCNA,PDGFRA,PKM,POSTN,PRKCZ,PSMB10,PSMB6,PSMB8,PSMB9,PTGES,PTPRE,RAC1,RB1,S100A6,SGK1,SLC12A6,SOD1,SPP1,TAC1,TAP1,TAP2,TAPBP,TBP,TERT,TIMP1,TIMP2,VCAM1,VCAN,VEGFA                                                                                                                                                                                                                                             |
| LDL    |        | complex                 | 2,353  | 2,397  | 0,005 | 4,08E-16 | 3,05E-14 | ABCG1,AKAP1,APOBEC3B,APOE,ARG2,ATF3,AXL,BCL2A1,C3,CAPN1,CAPN2,CASP1,CASP3,CASP6,CASP8,CCL20,CCL5,CCL8,CCND1,CCR2,CCR7,CD36,CD40,CDH5,CDK1,CTSK,CX3CR1,CXCL10,CXCL11,CXCL6,CYBB,CYP2C8,CYP2J2,DDIT3,DNMT1,DUSP1,F3,FAS,FCGR2B,FOS,FOSB,G0S2,GCLC,GCLM,GNAI1,GPR183,HIF1A,HSP90B1,HSPA5,ICAM1,IDO1,IFIT2,IFITM1,IGFBP4,IL10RA,IRF2,IRF7,ITGAV,ITGB3,MMP1,MMP2,MMP9,MX1,NAMPT,NFKB1,NME1,NOS2,NR0B2,NR1H3,NR4A1,NR4A3,PANX1,PARP1,PECAM1,PLIN2,PTEN,PTPRF,RCAN1,RND3,S100A8,SELP,SHC1,SIGLEC1,SOD2,STAT3,TGFBR2,TGFBR3,TLR4,TNFAIP6,TNFSF10,TP53,VCAM1,VEGFA,XRP1                                                                                                                                                                                                                                                                                         |
| CEBPA  | 0,150  | transcription regulator | -0,742 | -0,707 | 0,003 | 4,55E-16 | 3,37E-14 | A2M,ACACA,ACSL1,ADCY7,ADH1B,ADH6,AGPAT2,AKAP12,AKR1B1,ALB,ALOX5AP,ANXA1,APOA4,APOC3,ARG2,ARL4C,ARL6IP5,ASL,ASNS,ASS1,BCL2A1,BHMT,BIN1,C3,C3AR1,CA2,CCL20,CCNA2,CCNB2,CCND1,CCND2,CD14,CD3G,CEBPE,CFD,CKAP4,COL1A1,COL1A2,CRADD,CSF1R,CTSK,CXCR4,CYP2A6 (includes others),CYP2B6,CYP3A4,CYP3A7,DHCR7,DYNLT3,EFNB2,EPHX1,EVPL,FHL1,FOS,FOXO1,FTO,G0S2,G6PC,GADD45A,GBP1,GCH1,GH,GJA1,GLIPR1,GLRX,GSTP1,H1-10,HDAC1,HLA-B,HNF1A,HNF1B,HPGD,HSPA5,ICAM1,ICAM2,ID1,ID2,IFI27,IFI6,IGFBP4,IL6R,INSR,ISG15,ITGAL,ITGAM,KRT7,LCK,LCN2,LEPR,LGALS1,LITAF,LST1,LTF,MALT1,MNDA,NFIL3,NRP1,OAS2,OVOL1,PCK1,PCNA,PLIN2,PLOD2,PLXND1,PPARA,PPARGC1A,PPL,PPP1R3C,PRLR,PTGS1,PTPRC,PTPRE,RAB31,RIN1,RORA,RUNX3,S100A8,S100A9,SCD,SECTM1,SERPINB1,SERPINF1,SMPDL3A,SOD1,SOD2,SPIP2,SPP1,STEAP4,TAC1,TBXAS1,THRB,TIAM1,TNFAIP6,TNFSF10,TUBB2A,UBE2L,VCAN,VDR,VLDR,ZBTB48 |

|         |        |                                 |           |        |        |          |          |                                                                                                                                                                                                                                                                                                                                                                                                                                                                                                                                                                                                                                                                                                                                                                                                                                                                                                  |                                                                                                                                                                                                                                                                                                                                                                                                                                                                                                                                                                                                                                                                                                                                                                                                                                          |
|---------|--------|---------------------------------|-----------|--------|--------|----------|----------|--------------------------------------------------------------------------------------------------------------------------------------------------------------------------------------------------------------------------------------------------------------------------------------------------------------------------------------------------------------------------------------------------------------------------------------------------------------------------------------------------------------------------------------------------------------------------------------------------------------------------------------------------------------------------------------------------------------------------------------------------------------------------------------------------------------------------------------------------------------------------------------------------|------------------------------------------------------------------------------------------------------------------------------------------------------------------------------------------------------------------------------------------------------------------------------------------------------------------------------------------------------------------------------------------------------------------------------------------------------------------------------------------------------------------------------------------------------------------------------------------------------------------------------------------------------------------------------------------------------------------------------------------------------------------------------------------------------------------------------------------|
| E2F1    |        | transcription regulator         | 0,868     | 0,920  | 0,006  | 4,67E-16 | 3,43E-14 | ABCG2,ACADL,ACSL5,ACTR3,ALG5,ALPL,AURKA,BAX,BID,BNIP3,CA2,CALM1 (includes others),CALR,CASP3,CASP6,CASP8,CAV1,CCNA2,CCNB1,CCNB2,CCND1,CCND2,CCND3,CCT2,CD2AP,CD44,CD9,CDC25B,CDK1,CDKN1B,CDKN1C,CDKN2C,CLIC1,CRADD,CRIIP2,CSE1L,CSHL1,CTNBP1,CTSB,CYB5A,CYP27B1,DDI2,DDIT3,DDX1,DLEU1,DNM1,DUSP1,ECT2,EED,ERH,EYA2,EZH2,FAS,FGFR3,FHIT,FHL1,FKBP3,FOS,FOXO1,GINS1,GM2A,GPS2,GRAMD4,HADHA,HMGB2,HNRNP R,HSD11B2,HSP90B1,HSPA8,ICAM1,ID3,JPT1,KRAS,KRT10,LCK,MAD2L1,MAF,MCM2,MCM3,MCM5,MCM6,MCM7,MFAP1,MMP1,MSH2,MT1G,MTHFD1,MYB,NCL,NDC80,NDUFC1,NMI,NRP1,OXT,PCLAF,PCNA,PDCD5,PDK4,PHB,PLK2,PMPCB,PPARGC1A,PPP1R26,PPP1R8,PPT2,PSAT1,PSMB9,RB1,RBFOX2,REV3L,RFC2,RND3,RPA2,RPA3,RPS16,RRM1,RRM2,SERPINF2,SLC22A18AS,SLC3A2,SMARCA5,SMC4,SOD2,STAM,STK17B,STMN1,TAP1,TAP2,TAPBP,TERT,TOP2A,TOP2B,TOPBP1,TP53,TP53BP2,TRAP1,UCP2,ULK1,UQCRL1,VCAM1,VEGFA,VIM,VRK1,WWOX,XPC,YBX3,YWHAE,ZFP36,ZNF272 |                                                                                                                                                                                                                                                                                                                                                                                                                                                                                                                                                                                                                                                                                                                                                                                                                                          |
| IRF7    | 0,848  | transcription regulator         | Activated | 7,741  | 7,822  | 0,010    | 5,47E-16 | 3,99E-14                                                                                                                                                                                                                                                                                                                                                                                                                                                                                                                                                                                                                                                                                                                                                                                                                                                                                         | ADAR,APOBEC3G,BCL2L13,CASP4,CCL19,CCL5,CCL8,CD40,CD69,CXCL10,CXCL9,DDX58,GBP1,IDO1,IFI16,IFI35,IFI44,IFI44L,IFI6,IFIH1,IFIT2,IFIT3,IFITM1,IFITM2,IFNA10,IL15,IL15RA,IL33,IRF1,IRF7,IRF8,IRF9,ISG15,ISG20,ITGAM,MICB,MX1,MX2,NAMPT,NMI,OAS1,OAS2,OAS3,PARP12,PHF11,PLAC8,PLSCR1,PSMB10,PSMB8,PSMB9,PSME1,RSAD2,RTP4,S100A8,STAT1,TAP1,TAP2,TDRD7,TLR4,TLR8,TMBIM6,TNFAIP8,TNFSF10,TOR1B,TPST1,TRIM21,TRIM22,TRIM5,UBA7,UBE2L6,XAF1                                                                                                                                                                                                                                                                                                                                                                                                        |
| CSF2    |        | cytokine                        | Activated | 4,376  | 4,459  | 0,008    | 7,62E-16 | 5,51E-14                                                                                                                                                                                                                                                                                                                                                                                                                                                                                                                                                                                                                                                                                                                                                                                                                                                                                         | ABCG1,ACE,ACP5,ADA,ADAM17,ADGRE5,AKR1A1,ALOX5,ALOX5AP,ANXA1,AOC1,AURKA,BAX,BCL2A1,BID,BIRC3,C3,CASP1,CASP3,CCL18,CCNA2,CCNB1,CCND1,CCND2,CCND3,CCR5,CCR7,CD14,CD163,CD180,CD1C,CD24,CD38,CD40,CD63,CD69,CD74,CD83,CD86,CD8A,CDC123,CDK1,CDKN1B,CDKN2C,CFH,CISH,CLEC7A,CSF1R,CSF2RB,CXCL1,CXCL10,CXCR4,CYBB,DDIT3,F2RL1,F3,FANCL,FAS,FCGR2B,FOLR2,FOS,FOSL1,GADD45GIP1,GCH1,GCLM,GK,HIF1A,HLA-DQB1,ICAM1,ID2,ID3,IDO1,IK,IL13,IL15,IL1R1,IL32,INPP5D,IRAK1,IRF2,ITGAM,ITGB3,LAMP3,LCP1,LTB,LY75,LY96,MAT2A,MCM3,MCM5,MCM6,MET,MMD,MME,MMP1,MMP2,MMP9,MNS1,MRC1,MYB,NET1,NFKB1,NOS2,NR1H3,NR4A1,NRP1,OSMR,PHGDH,PLAGL2,PLD1,PMP22,PPP1R15A,PRC1,PRNP,PROZ,QSOX1,RB1,RHOH,RIPOR2,RRM2,SERPINB9,SGK1,SLC1A5,SOCS2,SOD2,SPAG5,SPP1,STMN1,TCF4,TERT,TLR1,TLR2,TLR4,TLR5,TNFRSF10D,TNFRSF1B,TOP2A,TP53,TP11,TPX2,UBD,UBE2C,VDR,VTCN1,XBP1,ZFP36 |
| ethanol |        | chemical - endogenous mammalian |           | 1,379  | 1,408  | 0,003    | 8,66E-16 | 6,20E-14                                                                                                                                                                                                                                                                                                                                                                                                                                                                                                                                                                                                                                                                                                                                                                                                                                                                                         | ABCG1,ACACA,ACADL,ACADM,ACKR3,ACOX1,ADAM17,ADIPOR1,ADM,ALDH1A3,ALOX5,APOA1,ATF3,AVP,BAX,BHMT,C3AR1,CAPN1,CASP3,CAT,CCL5,CCND1,CD14,CD36,CDKN1B,CHUK,CLIC4,CLU,COL1A2,COL3A1,CXCR4,CYP2A6 (includes others),CYP2B6,CYP2C8,CYP3A4,CYP3A7,CYP4A11,DDIT3,DUSP1,EPHX1,ESR1,ETNPPL,FAAH,FABP1,FABP2,FAS,FOS,FOSB,G6PC,GADD45A,GNAI1,GNAI2,GNAS,GPT,GRK2,GSR,GZMB,HAO2,HIF1A,HLA-A,HOXA1,HSBP1,HSD17B10,HSP90B1,HSPA5,HTATIP2,ICAM1,ID1,IGHM,IL15,IL1R1,IRF7,ITGAM,LGALS1,LPIN1,MAPK8,MAT2A,MLXIPL,MME,MMP2,MMP9,MYD88,NCF2,NMI,NOS2,NPPA,NR1I3,NSDHL,NTRK2,PARP1,PCK1,PCNA,PHB,PNPLA2,PPARA,PPARGC1A,PPP1R3C,PRF1,PTEN,RBP1,RHOB,RORA,SCD,SGK1,SLC2A2,SOD1,SOD2,STAT1,STAT3,TBP,TFF3,TFPI2,TIMP1,TIMP2,TLR1,TLR2,TLR4,TLR7,TLR8,TNFAIP8,TP53,TRIP3,VAMP2,VCAM1                                                                                 |
| VEGFA   | -0,804 | growth factor                   |           | -0,094 | -0,021 | 0,007    | 9,23E-16 | 6,56E-14                                                                                                                                                                                                                                                                                                                                                                                                                                                                                                                                                                                                                                                                                                                                                                                                                                                                                         | ABCC1,ACADM,ACE,ACSL1,ADAMTS1,ADH5,ALDH2,ARG2,ATP5MC2,BAX,BCL2A1,CASP3,CAV1,CBFB,CCND1,CD36,CD40,CD55,CD83,CD86,CDH5,CDKN1B,CLIC4,COL1A1,COX5B,COX8A,CSTB,CTSB,CTSS,CTSV,CXCL10,CXCL12,CXCL6,CXCR4,DECR1,EFNB2,ERAP1,ESM1,ETFA,F3,FN1,FOS,FOSB,GBP1,GJA1,GRB10,HIF1A,HK1,HLA-DQB1,HSPA5,ICAM1,ID1,ID3,IGFBP4,INPP5D,ITGA2,ITGAV,ITGB3,MDH2,ME2,MEF2C,MMP1,MMP2,MMP9,MRPS12,NME1,NOS2,NPHS1,NR2F2,NR4A1,NRP1,PARP1,PCNA,PECAM1,PNPLA2,PPARGC1A,PRKCA,PTGS1,RCAN1,SDHB,SDHD,SET,SHMT2,SLC12A6,SLC25A5,SMTN,SNCG,SOD2,SPARC,ST5,STARD8,TERT,TFPI2,TIMP1,TLR1,TMSB10/TMSB4X,TNC,TP53,TSPO,TUFM,TXN2,VASH1,VCAM1,VEGFA                                                                                                                                                                                                                        |

|        |        |                         |           |        |        |        |          |          |                                                                                                                                                                                                                                                                                                                                                                                                                                                                                                                                                                                                                                                                                                                                                                                                                      |
|--------|--------|-------------------------|-----------|--------|--------|--------|----------|----------|----------------------------------------------------------------------------------------------------------------------------------------------------------------------------------------------------------------------------------------------------------------------------------------------------------------------------------------------------------------------------------------------------------------------------------------------------------------------------------------------------------------------------------------------------------------------------------------------------------------------------------------------------------------------------------------------------------------------------------------------------------------------------------------------------------------------|
| ACOX1  | -0,586 | enzyme                  | Inhibited | -2,377 | -2,391 | -0,002 | 1,19E-15 | 8,37E-14 | ACAA1,ACADL,ACADM,ACADVL,ACOX1,ACSL1,ADAMTS1,ANXA2,BAAT,CAT,CD36,CD63,COL4A2,CRAT,CSTB,CTSV,CXCL12,CYP2C8,CYP4A11,CYP4F12,DDIT3,DIO1,DPP4,EHHADH,FABP2,FAH,G6PC,GADD45A,GNMT,GOT1,GSTP1,HDAC1,HLA-DQA1,HPD,HSPA5,LCN2,LGALS3BP,LHPP,LONP1,NFE2L2,NR1H3,OAT,PAH,PDK4,PIGP,PIPOX,PLIN2,PLSCR1,PXMP2,QPCT,RGN,RP24,SELENBP1,SGK1,SLC27A2,SLC37A4,SLC4A4,TAGLN2,TP53,TRIB3,UCP2,UGCG,XBP1                                                                                                                                                                                                                                                                                                                                                                                                                                |
| TRIM24 | 0,331  | transcription regulator | Inhibited | -4,784 | -4,845 | -0,009 | 1,39E-15 | 9,72E-14 | AGRN,BLNK,CA2,CALB1,CNOT6,CXCL10,DDX58,DDX60,FAM110B,FBN1,FLRT3,GBP2,GLUL,HERC6,HNF1B,IFI35,IFI44,IFIH1,IFIT2,IFIT3,IFNGR1,IFNGR2,IRF1,IRF7,IRF9,ISG15,LGALS3BP,NMI,OAS1,PARP12,PCLAF,PHF11,PLAC8,PRKCQ,PSMB10,PSMB8,PSMB9,RTP4,SAMHD1,SOCS2,SPP1,STAT1,TAP1,TGFB1,TLR2,TP53,TRIM26,TRPV5,UBA7,VEGFA                                                                                                                                                                                                                                                                                                                                                                                                                                                                                                                 |
| JUN    | -0,404 | transcription regulator |           | -0,488 | -0,438 | 0,005  | 1,67E-15 | 1,15E-13 | A2M,ACP5,AFP,AKAP12,ANXA1,ANXA2,APOC3,APOE,APOM,ASNS,ATF3,AXL,BAX,BCL2A1,BIRC2,BIRC3,C3AR1,CALM1 (includes others),CAPN2,CAV1,CCL20,CCL8,CCN3,CCNA2,CCND1,CCND2,CCND3,CD14,CD164,CD247,CD44,CDK1,CDKN1B,CGA,CLU,COL1A1,COL1A2,COMT,CSF1R,CSTA,CXCL1,CXCL10,CYP1B1,CYP2J2,DICER1,DNMT1,DROSHA,DUSP1,EHD4,EPHX2,EVX1,F3,FAS,FN1,FOLR2,FOS,FOSL1,FRZB,FUS,GADD45A,GCLC,GJA1,GOT1,GPT,GSTP1,HLA-B,HLA-G,HPGD,ICAM1,ID2,IFI16,IGFBP4,IGFBP6,IGFBP7,IL7R,ITGAM,ITGAV,ITGB8,LHB,LPAR1,MAF,MAOB,MAT2A,MCF2L,MET,MMP1,MMP2,MMP7,MMP9,MSH2,MX11,MYB,NCF2,NGF,NKX2-5,NOS2,NOX5,NPPA,NR0B2,NR4A1,PDCC4,PEA15,PLA2G4A,PPM1D,PTEN,PTGES,PTPN6,PTPRD,PXDN,RARG,RGN,RHOB,RXRA,S100A10,SCD,SDC1,SERPINB9,SGK1,SLC10A2,SMAD7,SNCG,SNRN,P70,SOD2,SPARC,SPP1,SST,STAT1,STMN1,SYK,TIMP1,TNC,TNNC1,TP53,TYX1,VCAM1,VDR,VEGFA,VIM,ZEB2,ZEB3 |
| NRAS   | 0,127  | enzyme                  |           | -1,649 | -1,676 | -0,004 | 1,70E-15 | 1,17E-13 | ACADM,AGRN,AKAP12,ANXA4,B2M,BAX,CALCRL,CCL5,CCNB1,CNB2,CCND1,CCNG1,CD48,CD86,CDKN3,CFH,CKM,COL1A2,CXCR1,CYBB,EIF2D,ENPEP,EPHX1,FHL1,FN1,GALE,GBP2,GJA1,HIF1A,HLA-A,HOMER3,HTRA1,IFI16,IFI35,IFIH1,IGHM,IL13RA1,ISG15,ITGA2,JC HAIN,KCTD12,KIF22,KRAS,LCN2,LGALS1,LSP1,LY86,MCM3,MGP,NCF2,NPPA,NPR3,OIP5,OSBPL1A,P3H4,PERP,PHLDA3,PLEKH01,PLTP,PRDX2,PSMB8,RBM38,RBPMS,RHOB,RNASE6,SARDH,SDC1,SERPINE2,STAT1,STAT3,TAP1,TMEM43,TUBB2A,UBE2C,VEGFA,XPNPEP2                                                                                                                                                                                                                                                                                                                                                             |
| PAX3   |        | transcription regulator |           | 0,905  | 0,917  | 0,004  | 1,80E-15 | 1,23E-13 | ALDH3A2,ANOS1,ANXA1,AP3M2,ARC,ARHGDI1B,ASNS,ASS1,ATP2B4,BST2,CAPN1,CD151,CDH3,CLU,COL1A2,CPN2,CXCR4,CYP1B1,DBN1,DPEP1,EYA2,F2RL1,F3,FHL1,FUBP1,G0S2,GLB1,GLDC,GPT,GUCY1A1,HLA-DRB1,HNRNPA3,HTR6,ICAM2,ID2,ID3,IFITM2,IL6R,IL7R,MCAM,ME T,MGP,MICB,MMP9,NEDD9,NNMT,NUDT1,PAK2,PCNA,PEA15,PHGDH,PIIB,PSME1,PTGER3,PTP4A1,PTPN12,PXDN,RAB31,RASSF2,RHOB,RUNX3,SFN,SHMT1,SLA,SOX4,SRGN,TCN2,TFPI2,TIA1,TN C,TNNI1,TP53,TSC22D1,TSPAN7,TYRO3,VCAN,YWHAE                                                                                                                                                                                                                                                                                                                                                                   |
| CNOT7  | 0,001  | transcription regulator | Inhibited | -2,136 | -2,157 | -0,007 | 2,19E-15 | 1,48E-13 | B2M,BST2,CLDN1,CSTA,HERC6,IFI27,IFI35,IFI44L,IFI6,IFIT5,IFITM1,ISG15,LGALS3BP,OAS1,OAS2,OAS3,PARP12,PLSCR1,PSMB8,SP10,STAT1,TAP1,TAP2,TFF3,UBE2L6                                                                                                                                                                                                                                                                                                                                                                                                                                                                                                                                                                                                                                                                    |
| CREBBP |        | transcription regulator |           | -1,019 | -0,978 | 0,007  | 2,55E-15 | 1,70E-13 | AKAP12,AP3M2,ASL,B2M,BANK1,BCL6,BMP7,CA2,CAMK2G,CAPG,CCL5,CCND1,CCND2,CCND3,CCR5,CCR7,CD44,CD53,CD59,CDH5,CDKN1B,CGA,CKM,COL1A2,CST7,CXCL10,CXCL12,CXCL9,CXCR4,CYBB,DDC,DHRS3,DUSP1,DUSP22,EHHADH,EPN1,EVI2A,EVL,EYA2,FDX1,FGFR3,FBP1,FDNC3B,FOS,FOSB,G6PC,GIMAP4,GM2A,GNAS,GPR18,HBB,HLA-B,HLA-DRA,HLA-G,HMGCS2,HSD3B2,IL10RA,IL2RB,IL7R,INHA,IRF1,ISG15,JUND,KMO,LGALS3BP,MAF,MCF2L,MCM3,MEF2C,MFHAS1,MGA,MMP9,MSH2,MYO1F,NDRG1,NFE2L2,NOS2,NPPA,NR4A1,NR4A3,OAS3,PC K1,PCNA,PDE10A,PDLIM4,PHIP,PIPOX,PKLR,PLEKHF1,PPARGC1A,PRF1,PRKCD,PSMB9,PTPRF,RB1,RHOA,RNASEL,RSAD2,RTP4,SDC1,SELP,SERPINA3,SERPINE2,SH2D1A,SPSB1,SST,ST6GAL1,STAT4,TAP2,TAPBP,TESE,TIPARP,TLE2,TLR2,TMPRSS2,TMPRSS4,TNC,TNFSF10,TRAT1,TRIM26,UTRN,VCAM1,VEGFA,WNT8B                                                                          |

|                   |        |                                 |           |        |        |       |          |          |                                                                                                                                                                                                                                                                                                                                                                                                                                                                                                                                                                                                                                                                                                                                                                                                                                                                                                                                                                                                                                                                                                                                                                                                                                                                                                                                                       |
|-------------------|--------|---------------------------------|-----------|--------|--------|-------|----------|----------|-------------------------------------------------------------------------------------------------------------------------------------------------------------------------------------------------------------------------------------------------------------------------------------------------------------------------------------------------------------------------------------------------------------------------------------------------------------------------------------------------------------------------------------------------------------------------------------------------------------------------------------------------------------------------------------------------------------------------------------------------------------------------------------------------------------------------------------------------------------------------------------------------------------------------------------------------------------------------------------------------------------------------------------------------------------------------------------------------------------------------------------------------------------------------------------------------------------------------------------------------------------------------------------------------------------------------------------------------------|
| PPARGC1A          | -0,374 | transcription regulator         | Inhibited | -6,098 | -6,076 | 0,002 | 2,56E-15 | 1,70E-13 | ACACA,ACACB,ACADL,ACADM,ACADVL,ACAT1,ACOX1,ADAMTS1,ADGRG1,ANG,APOA4,APOC3,BAX,BNIP3,C2,C3,CALM1 (includes others),CAT,CD36,CD40,CIDEB,COL1A2,COL6A3,COX5B,COX7B,CXCL10,CXCL14,CYP2A6 (includes others),CYP2B6,CYP3A4,DCN,DGAT1,DIO1,DLAT,ENDOG,ESRRA,G6PC,GK,GOT2,HMGCL,HMGCS2,HSD3B2,IGFBP6,IGFBP7,IL18,IL4R,INHA,INPP5J,ITGB1BP1,KYAT1,LAMB1,LIPA,LPIN1,LUM,MAL,MAOB,MCM3,MCM5,MCM6,MDH2,ME1,MMP2,MMSO1,NDUFS1,NDUFS8,NPPA,NR1H3,NR1I3,NSDHL,PCK1,PCK2,PCSK5,PDIA5,PKD2,PKD4,PHYH,PLA2G7,PLA2R1,PLIN2,PNPLA2,POSTN,PPARA,PPARGC1A,PRDX3,PVALB,RXRA,SCD,SDHB,SERPINA3,SERPINE2,SI RT3,SLC25A20,SLC39A14,SMAD7,SOD1,SOD2,TGFBR3,THY1,TIMP1,TIMP2,TNFRSF11B,TNFSF10,TNNI1,TP53,TRIB3,TXN2,TXNRD2,UCP2,UQCRC2,VAMP2,VCAN,VEGFA                                                                                                                                                                                                                                                                                                                                                                                                                                                                                                                                                                                                                          |
| INSR              | -0,426 | kinase                          | Inhibited | -5,966 | -5,906 | 0,008 | 3,58E-15 | 2,29E-13 | ACAA2,ACADL,ACADM,ACADS,ACADVL,ACO2,ACOT13,ACSL1,ACSL5,ALAD,ALB,ALDH2,ALDH6A1,AQP1,ATF3,ATP5F1D,BAG1,BCL2A1,C1QA,C2,CASP6,CCND1,CCND2,CD36,CD83,CDK1,CDKN2C,COL6A3,CORO1A,COX6A2,CPT2,CRAT,CSTB,CTSB,CTSV,CXCR4,CYC1,CYP1B1,DECR1,DEK,DHCR7,DUSP1,ECHS1,ECH1,ETFA,ETFB,ETFDH,FBP1,FH,FHL1,FOS,GADD45A,GCH1,GNB1,GOT2,GRB10,GRN,HADHA,HSD17B10,IDH1,IDI1,IFITM2,IFNAR2,INSR,IQGAP1,KLF9,LCP1,LEPR,LGALS1,LRP10,LYZ,MAOA,MAOB,MARCKSL1,MCM2,MCM5,MCM7,MDH2,MMP2,MMP9,MSH6,MMSO1,MXI1,MYOM2,NA MPT,NDN,NDRG1,NDUFA3,NFE2L2,NGF,NPPA,NR1H3,NSDHL,OG DH,PDCD4,PKK4,PECR,PKLR,PMS1,PPARA,PPARGC1A,PRIM1,PRKCK,PRKD1,RHOB,RPS16,RRM1,RRM2,SC5D,SCD,SCP2,SEZ6L2,SIRT2,SKAP2,SLC25A20,SLC29A1,SOCS2,SUCLA2,THBS2,TNNI1,TSC2,TRAF1,UCP2,UQCRC1,UQCRC2,VCAM1                                                                                                                                                                                                                                                                                                                                                                                                                                                                                                                                                                                                     |
| hydrogen peroxide |        | chemical - endogenous mammalian |           | 1,004  | 1,066  | 0,005 | 6,27E-15 | 3,93E-13 | ACE,ADAM17,ADAM9,AEBP1,ALOX5,ANXA2,ATF3,AURKA,BAX,BC L2A1,BIRC3,CASP1,CASP3,CAT,CAV1,CCNA2,CCNB1,CCND1,CC ND3,CCNH,CCR2,CCR5,CD247,CD55,CD59,CD63,CD81,CD86,CDK 1,CDKN1B,CDKN2C,CFD,CLU,COL1A1,COL1A2,CTSB,CTSD,CTSS ,CXCL6,CXCR4,DDIT3,DHCR7,DNAJB1,DNMT1,DPAGT1,DUSP1,EN C1,ENG,ENPP2,EZH2,F2RL1,FAS,FN1,FOS,FOSL1,FOXO4,FZD2, GADD45A,GADD45B,GLRX,GRK2,GSTA1,GZMB,HIF1A,HLA- DR A,HMGCS2,HSPA5,ICAM1,ID3,IER5,IF16,IFIT2,IL10RB,IL13,IL32,I TGA2,ITGA3,ITGB3,KITLG,KRAS,LCN1,LCN2,MAPK8,MAPKAP1,MC AM,MCM2,MDK,MIF,MMP1,MMP2,MMP9,MMSO1,MUC1,NAT10,NDC 80,NFE2L2,NFIL3,NGF,NOS2,NOX5,NR4A1,OSGIN1,PAH,PARP1,P CBP2,PDCD10,PDCD4,PDGFRA,PDIA3,PDIA4,PPARGC1A,PPM1D, PRDX2,PRKCI,PSTPIP2,PTEN,PTP4A2,RAB27A,RAC1,RIOK3,RNF1 9B,RTN3,RUNX3,SC5D,SGK1,SHC1,SOD1,SOD2,SPARC,SPP1,SR GN,STAT3,STMN1,TAP1,TGFBR3,TLR4,TP53,TRIB3,TUBB2A,TXN, TYNIP,UQCRC2,VCAM1,VDR,VEGFA,VIM,WNK1,YAF1,YRP1                                                                                                                                                                                                                                                                                                                                                                                                                                                             |
| Akt               |        | group                           | Activated | 2,134  | 2,165  | 0,003 | 7,02E-15 | 4,37E-13 | A2M,ADM,AQP3,B4GALT5,BAX,BCL2A1,BCL6,BHLHE40,BID,BIRC2, CCND1,CCND2,CCND3,CCR7,CD36,CD44,CDKN1B,CDKN1C,COL3 A1,CTSD,CXCL10,CXCL12,CXCR4,ERBB3,ESR1,EZH2,F3,FAS,FH I T,FKBP5,FN1,FOS,FOSL1,FOXO1,GSR,GSS,GSTK1,HIF1A,HPGD,I L13,IL1R1,IL2RB,IL32,IL7R,INSR,KL,LCN2,MCAM,MMP2,MMP9,MT1 X,MUC1,MYB,NDRG1,NDUFV1,NET1,NFE2L2,NFIL3,NFKB1,NOS2, NOTCH2,NOX4,NPPA,NR0B2,OSTF1,PCK1,PCNA,PKK4,PEA15,PL A2G4A,PLG,PPARGC1A,PTGS1,RB1,RHOB,RRM2,SDHB,SGK1,SO D2,SOX4,SPP1,TERT,THBS2,TIPARP,TJP1,TLR2,TMED10,TNC,TN F5F10,TP53,UQCRC2,UTRN,VCAM1,VCAN,VEGFA,WT1,WTAP,XB P1                                                                                                                                                                                                                                                                                                                                                                                                                                                                                                                                                                                                                                                                                                                                                                                     |
| TP73              | -0,171 | transcription regulator         |           | -0,447 | -0,416 | 0,003 | 7,51E-15 | 4,63E-13 | ABCC1,ADA,ADAM10,ADAM17,AFP,ATF3,ATG4A,AUH,AURKA,B2M ,BAX,BHLHE40,BID,BIRC2,BMP7,C1R,C3,CASP1,CASP3,CASP4,C CNA2,CCNB1,CCND3,CCNG1,CD55,CD83,CDC25B,CDK1,CDKN1B, CDKN1C,CDKN3,CLEC7A,CLMN,COL18A1,COL1A1,COL5A2,CTH, C TSD,CXCL1,CXCL10,DDIT3,DHRS3,DIMT1,DRAM1,DTYMK,ENG,ER CC2,FAS,FGFR3,FN1,GOS2,GAB2,GADD45A,GPNMB,GPR137B,GR K5,GRN,HAGH,HIF1A,HPSE,HSPB8,HTATIP2,ID2,IGFBP4,IGSF3,IL 4R,IL7,KIF22,KRT10,LCP1,LYZ,MCM6,MCM7,MDK,MIR22HG,MMP2, MPZL2,MTHFD1,NAP1L3,NFKB1,NRP1,PERP,PIK3R3,PLK2,PMP22, PPL,PRKAG2,PROCR,PTEN,PTGES,RB1,RBX1,S100A2,SERPINA3, SERPINA5,SERPINE2,SERPINF1,SERPING1,SFN,SMUG1,SPHK2,S PP1,STMN1,TAP1,TERT,THBS2,THY1,TIMP1,TNFAIP2,TNFRSF1B, TNNI1,TP53,TPX2,TREM2,TRIM22,TRIM32,TSPAN1,UBE2C,UBE2D 1,UBI3,UBI4,UBI5,UBI6,UBI7,UBI8,UBI9,UBI10,UBI11,UBI12, UBI13,UBI14,UBI15,UBI16,UBI17,UBI18,UBI19,UBI20,UBI21, UBI22,UBI23,UBI24,UBI25,UBI26,UBI27,UBI28,UBI29,UBI30, UBI31,UBI32,UBI33,UBI34,UBI35,UBI36,UBI37,UBI38,UBI39, UBI40,UBI41,UBI42,UBI43,UBI44,UBI45,UBI46,UBI47,UBI48, UBI49,UBI50,UBI51,UBI52,UBI53,UBI54,UBI55,UBI56,UBI57, UBI58,UBI59,UBI60,UBI61,UBI62,UBI63,UBI64,UBI65,UBI66, UBI67,UBI68,UBI69,UBI70,UBI71,UBI72,UBI73,UBI74,UBI75, UBI76,UBI77,UBI78,UBI79,UBI80,UBI81,UBI82,UBI83,UBI84, UBI85,UBI86,UBI87,UBI88,UBI89,UBI90,UBI91,UBI92,UBI93, UBI94,UBI95,UBI96,UBI97,UBI98,UBI99,UBI100 |

|       |                                   |                                   |        |        |          |          |                                                                                                                                                                                                                                                                                                                                                                                                                                                                                                                                                                                                                                                                                                                                                                         |                                                                                                                                                                                                                                                                                                                                                                                                                                                                                                                                                                                                                                                                                                                                                                                                                |
|-------|-----------------------------------|-----------------------------------|--------|--------|----------|----------|-------------------------------------------------------------------------------------------------------------------------------------------------------------------------------------------------------------------------------------------------------------------------------------------------------------------------------------------------------------------------------------------------------------------------------------------------------------------------------------------------------------------------------------------------------------------------------------------------------------------------------------------------------------------------------------------------------------------------------------------------------------------------|----------------------------------------------------------------------------------------------------------------------------------------------------------------------------------------------------------------------------------------------------------------------------------------------------------------------------------------------------------------------------------------------------------------------------------------------------------------------------------------------------------------------------------------------------------------------------------------------------------------------------------------------------------------------------------------------------------------------------------------------------------------------------------------------------------------|
| TCF4  | 0,649                             | transcription regulator           | 0,562  | 0,589  | 0,003    | 8,96E-15 | 5,45E-13                                                                                                                                                                                                                                                                                                                                                                                                                                                                                                                                                                                                                                                                                                                                                                | ADA,ADAM17,APOBEC3G,ARHGGEF6,BACH2,BARD1,BCL2L13,BCL6,BHLHE40,BMP7,BNIP3,CARD8,CASP1,CASP3,CASP4,CASP8,CCNA2,CCNB2,CCND1,CCT6A,CD2,CD24,CD38,CD40,CD55,CD9,CDC25B,CDK1,CDKN1C,CDKN3,CEP55,CKAP4,CRELD2,DCK,DDX58,DMT1,DNAJC12,DSTN,EAF2,ELF1,ELF4,FAM111A,FAS,FGF1,FKBP1,FKBP8,FN1,FOS,FOXO1,GEMIN6,GIMAP4,GRPEL1,HIF1A,HMGB2,HSP90B1,HTR2B,ID2,ID3,IDO1,IFI16,IGFBP4,IL15,MAD2L1,MANF,MEF2C,MMP1,MORF4L2,MYB,MZB1,NDC80,NEDD9,NEIL1,NELL1,NOS2,NOTCH2,OPTN,OSBPL1A,PARP8,PDIA4,PDIA6,PIK3C2B,PLAC8,PLK2,PPID,PPIH,PRC1,PRDX4,PSD3,RIPOR2,RPL35A,RRM2,SACS,SDF2L1,SEC24D,SELL,SERPINB1,SERPINF1,SGK1,SH3GLB1,SLC35B1,SLC9A3R1,SMAD1,SMAD2,SMAD7,SMAGP,SORBS2,SP140L,SPP1,STAT3,SUB1,TAPBPL,TERT,TIA1,TMEM140,TMEM184B,TNFSF10,TRAF5,TRIM38,TXNIP,VCAN,WARS1,XBP1,ZEB2,ZP2                                      |
| IGF1  | 0,033                             | growth factor                     | 0,513  | 0,566  | 0,005    | 9,10E-15 | 5,50E-13                                                                                                                                                                                                                                                                                                                                                                                                                                                                                                                                                                                                                                                                                                                                                                | A2M,ACACA,ACTR1B,ADA,ADM,AKR1B1,BAX,BCL2A1,BHLHE40,BIRC3,C1QA,CASP3,CCL5,CCNA2,CCNB1,CCND1,CCND2,CCND3,CNG1,CD44,CDK1,CDKN1B,CISH,CLU,COL1A1,COL3A1,CSHL1,CTSD,CXCL6,CYBA,CYBB,CYFIP2,CYP17A1,CYP27B1,DCLK1,DDIT3,DDX50,DUSP1,EFNB2,EGF,ESR1,F3,FN1,FOS,FOSB,FOXO1,GADD45A,GADD45G,GHR,GPD1,GPER1,HBB,HIF1A,HSD11B2,HSD17B11,HSPA5,ICAM1,ID1,ID2,IFNGR2,IGFBP4,IGFBP6,IHH,IL18,IL1R1,IL4R,INHA,INSR,ITGA3,ITGAV,LCN2,LEPR,MAPT,MGA,MIF,MMP1,MM2,MX1,MYB,NCF2,NFE2L2,NOS2,NOX4,NPPA,NR4A1,NTRK2,OSMR,OXT,PARP1,PBK,PCK2,PCNA,PCOLCE,PDGFRA,PDLIM2,PITX3,PKM,PLK2,PRLR,PRNP,PSMB8,PSMB9,PTEN,PTH1R,PTPRC,SCD,SFN,SGK1,SHBG,SIRT2,SLC12A6,SLC2A8,SLPI,SNCG,SPP1,SS1,TAP1,TAP2,TBX2,TG,TGFB1,THY1,TJP1,TLR4,TNFRSF11B,TP53,TRPV1,TTF2,TXNIP,UBE2B,UBE2D2,UGCG,VCAM1,VEGFA,VEGFC,VIM,WDR45,WT1,WTAP,YRP1,YRY3,ZFP36 |
| AHR   | 0,505                             | ligand-dependent nuclear receptor | -0,817 | -0,807 | 0,001    | 9,99E-15 | 5,99E-13                                                                                                                                                                                                                                                                                                                                                                                                                                                                                                                                                                                                                                                                                                                                                                | A2M,ABCG2,ACACA,ACOX1,ACTN1,ADM,AKR1A1,ALB,ALDH1B1,ALDH2,ALDH3A1,ALOX5,ARG2,BAX,BZW2,CAMK2N1,CASP8,CBR3,CCL21,CCL5,CCNA2,CCNB1,CCND1,CCND3,CD14,CD36,CD38,CD325B,CDK1,CDKN1B,CDKN2C,COL16A1,COL1A1,COL1A2,COL3A1,COL4A1,COL4A2,COL5A1,COL5A2,COL6A3,COX8A,CTSD,CXCL10,CYP17A1,CYP1B1,CYP2A6 (includes others),CYP2B6,CYP2C8,CYP3A4,DCN,DIO1,DNAJB1,EFEMP1,EHD1,ENO1,ENPEP,ESR1,ESRRG,FAS,FN1,FOS,FOSL1,GADD45A,GHITM,GOT1,GSTA1,HIF1A,HSPA5,IDO1,IGHM,IRF1,ITGA7,ITGAM,LTBP3,MMP2,NEDD9,NFE2L2,NFYB,NID2,NMT2,NNMT,NOS2,OPA1,PCK1,PDGFRA,PJA1,PKLR,PLA2G12A,PMM1,PPP1R15A,RBP1,RORC,SCD,SDC1,SLC16A5,SLC1A1,SLC22A7,SNTA1,SOD1,SOD2,SPP1,STAT3,STEAP4,TD02,TFF3,TGFB1,TGFB2,TIMP2,TIPARP,TP53,TSPI,TYN,VEGFA,VEGFC,VIM                                                                                         |
| SPI1  | Activated transcription regulator | 3,749                             | 3,780  | 0,004  | 1,10E-14 | 6,54E-13 | ACTB,BAX,BCL11A,BCL6,BCL7A,BLNK,C3AR1,CCNA2,CCNB1,CCNB2,CCND1,CCND2,CCR7,CD14,CD180,CD1D,CDK1,CEBPE,CSF1R,CSF2RB,CTSK,CTSS,CXCL10,CYBB,DAB2,EPB41L2,FCER1A,FCER1G,FCGR2B,FCGR2,FLI1,FOS,FOXO1,HSPA8,ID2,ID3,IFI27,IFI44,IFI44L,IFI6,IFIT2,IFIT3,IFITM1,IL13,IL18,IL7R,IRF7,IRF9,ISG15,ISG20,ITGAM,ITGB2,KLK1,LAMP3,LBR,LIMD1,LTF,LYZ,MEF2C,MME,MMP1,MMP2,MRC1,MS4A1,MT1F,MT1G,MT1X,MX1,MYB,NCF2,NCF4,NKX2-5,NOS2,PARP12,PCNA,PSMB10,PSMB8,PSMB9,PTEN,PTPN6,PTPRC,RACK1,RSAD2,RUNX3,SP110,SPP1,TFEC,TLR2,TLR4,TNFSF10,TRIM22,VAV1,VIM                                                                                                                                                                                                                                    |                                                                                                                                                                                                                                                                                                                                                                                                                                                                                                                                                                                                                                                                                                                                                                                                                |
| CEBPB | transcription regulator           | 1,344                             | 1,409  | 0,006  | 1,27E-14 | 7,53E-13 | ADM,ALB,ALOX5AP,AOC1,APOC3,ASNS,ATR,BCL2A1,BHMT,BLNK3,CCL5,CCNA2,CCNB2,CCND1,CCND2,CCR5,CD14,CD1D,CDC25B,CDH3,CDKN1B,CFD,CIRBP,CLPP,COL1A1,COL1A2,COL5A2,CSF1R,CXCR4,CYB5A,CYP17A1,CYP27B1,CYP2A6 (includes others),CYP3A4,DAB2,DCN,DD2,DDIT3,DHCR7,DHRS1,DHX9,DYNTL1,EFNB2,FAS,FHL1,FHL2,FKBP6,FOS,FTL,G6PC,GADD45A,GNAS,GNLY,GSTA1,HBB,HLA-A,HSD3B2,HSPA8,ICAM1,ID1,IDH3B,IGFBP4,IGKC,IL7,INSR,IRF9,ITGAL,LAMC1,LCN2,LCP2,LEMD3,LEPR,LY96,LYN,MAPT,MCM3,MGP,MMP1,MSH2,NFE2L1,NOS2,NR1H3,NRP1,PCK1,PCNA,PCPT,PDGFRA,PKK4,PEA15,PLA2G4A,PLG,PLXND1,PPARA,PPARGC1A,PPP1R15A,PRKCD,PRLR,PRSS8,PSMA6,PTGES,PTGS1,RAC2,RBBP7,RCAN1,RORA,SCD,SEC11A,SGK1,SLC12A2,SMAD2,SPP1,SQOR,ST,STAT3,TAC1,TLR8,TM4SF1,TMEM50B,TNFAIP6,TP53,TRIB3,USP33,VCAN,VDR,VIM,VI,DI,R,YRP1,ZNF638 |                                                                                                                                                                                                                                                                                                                                                                                                                                                                                                                                                                                                                                                                                                                                                                                                                |



|         |        |                         |           |        |        |        |          |          |                                                                                                                                                                                                                                                                                                                                                                                                                                                                                                                                                                                                                                                                                                                                                                                                                                                                                                                                                                                                                            |
|---------|--------|-------------------------|-----------|--------|--------|--------|----------|----------|----------------------------------------------------------------------------------------------------------------------------------------------------------------------------------------------------------------------------------------------------------------------------------------------------------------------------------------------------------------------------------------------------------------------------------------------------------------------------------------------------------------------------------------------------------------------------------------------------------------------------------------------------------------------------------------------------------------------------------------------------------------------------------------------------------------------------------------------------------------------------------------------------------------------------------------------------------------------------------------------------------------------------|
| IFNB1   | -0,046 | cytokine                | Activated | 4,309  | 4,346  | 0,004  | 1,42E-14 | 8,26E-13 | ADAM17,ANXA5,APOL1,APOL3,AXL,BHLHE40,BST2,BTN3A3,CAPN2,CASP1,CASP3,CASP8,CCL5,CCR5,CD14,CD38,CD40,CD83,CD86,CDK10,CTSK,CXCL10,CXCL11,CXCL6,CXCL9,DDX58,DEFB1,DICER1,DKK3,FBN1,FOS,GBP2,GPC4,GZMH,HLA-A,HMGB2,IDO1,IDO1,IFI16,IFI27,IFI6,IFIH1,IFIT2,IFIT3,IFITM1,IFNGR1,IL13,IL18,IL1R1,IRF1,IRF7,IRF9,ISG15,ISG20,ITGAV,ITGB3,LAMB1,MCM6,MGST2,MMP2,MMP9,MX1,MYD88,NFKBIE,NID2,NMI,NNMT,NOCT,NOD2,NOS2,OAS1,OAS2,PARP12,PKD4,PKP2,PLAAT4,RNASEL,RND3,RSAD2,SLC39A14,SPP1,SPRY1,SPRY2,STAT1,STAT4,THBS2,TIMP1,TIMP2,TLR3,TLR7,TLR8,TNFSF10,TRIM21,TRIM38,UBA7,UCHL1,VDR,XAF1,ZDHHC14                                                                                                                                                                                                                                                                                                                                                                                                                                       |
| IKKBK   |        | kinase                  | Activated | 3,234  | 3,289  | 0,006  | 1,56E-14 | 9,04E-13 | AEBP1,AFP,ATF3,BAX,BIRC2,BIRC3,C3,CASP8,CCL19,CCL20,CCL5,CCNA2,CCND1,CCR7,CD44,CDC25B,CLU,CSF1R,CTSB,CTSF,CTSK,CTSZ,CXCL1,CXCL10,CXCL12,CXCL6,CXCR4,CYBA,CYP1B1,DCN,ECT2,ENPP2,EZH2,F3,FAS,FOS,FOXO1,FSCN1,FYN,GADD45A,GBP2,GCH1,GM2A,GRK5,GRN,HIF1A,HLA-A,ICAM1,IFI16,IGFBP6,IGFBP7,IL13,IRF1,ISG15,ITGB3,KIF20A,LCN2,LMNB1,LTB,MAT2A,MGP,MMP1,MMP2,MMP9,MX1,NAGLU,NFKB1,NGF,NOCT,NOS2,NPPA,PLA2G4A,POSTN,POU2AF1,PPM1D,PTEIN,RBP1,RCAN1,S100A4,SERPINE2,SFRP1,SGK1,SMAD7,SOCS2,SOD2,STAT3,TGFB2,TIMP2,TLR3,TNC,TNFAIP2,TNFRSF11B,TNFRSF1R,TP53,VCAM1,VCAN,VEGFA,ACTB,AURKA,BAX,BIRC2,CASP3,CCNA2,CCNB1,CCND1,CCND3,CD25B,CDK1,CDKN1B,CDKN3,CEP55,COL1A2,CPA3,CTSB,CTSK,DLGAP5,DSE,DTL,DUSP1,ECSIT,FANCG,FAS,FN1,GLB1,GRN,HMGB2,HSPA5,IL1R1,IL32,ITGAM,ITGAV,ITGB3,KIF20A,LBR,LGALS3BP,LIMA1,LUC7L3,MAD2L1,MAF,MCM2,MCM3,MCM6,MCM7,MMP1,MMP9,MTTP,P4HA1,PBK,PCLAF,PCNA,PHGDH,PLK2,PRC1,PTPRC,RB1,RPA3,RRM1,SHC1,SMC4,SOD2,SPAG5,SSPN,STMN1,TCN2,TERT,TNFAIP6,TP53,TPX2,TTK,TUBG2,UBE2C,VEGFA,VGLL4,VIM,YTHDC1,ZBED5,ZNF84 |
| CDKN1A  | -0,136 | kinase                  |           | -1,726 | -1,744 | -0,003 | 2,35E-14 | 1,34E-12 | ACKR3,ADD3,ADM,ADRB2,AKAP12,AKR7A2,ANXA11,ARAF,ARG2,ATF3,BHLHE40,C3,CALM1 (includes others),CASP4,CAV2,CCL20,CCL8,CCND1,CCND3,CD44,CDK1,CDKN1B,COL18A1,COL3A1,CSF1R,CTH,DAB2,DCN,DDIT3,DGAT1,DUSP1,F3,FGF7,FHL1,FHL2,FLNA,FMO1,FN1,FOS,FOSB,FOSL1,FRZB,FXD5,FZD2,GADD45A,GBP2,GHR,GJA1,GLUL,GPR183,GSS,GUCY1B1,HLA-E,IDO3,IGFBP4,KRAS,MAT2A,MCM6,MGST2,MMP1,MMP2,MMP9,MAPT,NFIL3,NOS2,NOX4,NPR3,NR4A1,NR4A3,NXF1,PCGF2,PCNA,PCTCE,PDGFRA,PDLIM1,PLK2,POSTN,PPP1R15A,QARS1,RACK1,RBP1,RHOB,RND3,RPN2,SCD,SERPINA3,SGK1,SLC1A1,SLC25A11,SLC29A1,SLC7A7,SOD2,SRSF7,STAT3,SYK,TEAD4,TIMP1,TNC,TOB1,TP53,TRA2B,TRIB3,TRIOBP,VCAM1,VCAN,VEGFA,ZFP36                                                                                                                                                                                                                                                                                                                                                                              |
| PDGF BB |        | complex                 |           | -0,020 | 0,034  | 0,006  | 2,82E-14 | 1,60E-12 | ADGRE2,ALPL,BCL2A1,BCL6,BIRC3,BNIP3,C12orf29,C3,CA2,CCND1,CD36,CD74,CD86,CD93,COX11,CX3CR1,CXCL10,DAPK2,DDX60,DLEU1,EHD1,FCER1G,FN1,GCA,GIMAP6,GJA1,GM2A,HIF1A,HLA-B,IFI35,IFI6,IFIT2,IFIT3,IFIT5,IL10RA,IRF9,ITGAM,ITGB3,LILRB2,LSP1,MAFB,MGP,MMP2,MMP9,NCF2,OAS1,OAS2,OAS3,OLFM4,PLAAT4,PLEKHO2,PLSCR1,POR,PPP1R16B,PTGES,PTGS1,S100A8,SACS,SAMHD1,SDCBP,SELL,SELP,SLC25A20,SLC27A2,SLPI,SMPD1,SPP1,STAT1,TAP1,TNFAIP2,TNFRSF11B,TOR1B,TP53,TPCN1,TRIM22,TYROBP,UBA7,VSIG4,WDR3,XAF1,ZNF146                                                                                                                                                                                                                                                                                                                                                                                                                                                                                                                              |
| TGM2    | 0,350  | enzyme                  | Activated | 5,529  | 5,567  | 0,004  | 3,12E-14 | 1,76E-12 | ACACA,ACACB,ACADS,ACSL1,ACSL5,ADGRG1,AGMAT,APOBEC3F,APOC3,ARF4,ATOX1,BAX,BEST1,BHLHE40,BHLHE41,CAP2,CD14,CFD,CXADR,CXCL10,CYB5A,CYP27B1,CYP4F2,DEPP1,DHCR7,EHHADH,ELOVL6,FAS,FN1,FOXO1,G6PC,GLB1,GNPMB,GPX3,GSR,HNF4A,HSPA5,IDO1,IDO1,IFI30,IGHM,LPIN1,MDK,MEF2C,MLYCD,MSMO1,MTTP,NCF2,NFIL3,NOS2,NR0B2,NR1H3,NSDHL,OAT,P4HA2,PCK1,PCK2,PIK3R3,PKLR,PLS3,PLTP,PMP22,PMPCA,PMVK,PNPLA3,RBP1,RDH11,RETREG1,RNASET2,RPS24,S100A13,SC5D,SCD,SERPINA3,SEZ6L2,SLC22A4,SLC22A5,SLC2A2,SMPD1,SORBS3,STXBP1,SUCLG1,TM7SF2,TNFRSF1B,TNNI1,TP53,UCP2,VEGFA                                                                                                                                                                                                                                                                                                                                                                                                                                                                            |
| SREBF1  | -0,051 | transcription regulator |           | -0,195 | -0,141 | 0,007  | 4,79E-14 | 2,68E-12 | ADM,AEBP1,AGRN,ANG,APOE,ASS1,C1R,C1S,C3,CASP1,CASP3,CBX6,CCL20,CD247,CD59,CLU,CPE,CXCL12,CXCL6,CYBA,DCN,ENPP2,F3,FAS,FN1,GLB1,GUCY1B1,ICAM1,IFI44,IFI44L,IFI6,IFIT2,IFITM1,IGFBP4,IRF8,ITGA3,LAMB1,LCN2,MEF2C,MIF,MMP9,MX1,MX2,NFKB1,OAS2,OAS3,OLFML2B,PCSK1N,PCSK5,RBP1,ROCK1,RXR A,SERPING1,SOD2,ST6GAL1,STAT1,TIMP1,TP53,TRIM22,VCAM1,VCAN,VEGFA,XAF1,YBX3                                                                                                                                                                                                                                                                                                                                                                                                                                                                                                                                                                                                                                                              |
| VCAN    | 2,007  | other                   |           | 1,522  | 1,529  | 0,001  | 8,45E-14 | 4,70E-12 | ADM,AEBP1,AGRN,ANG,APOE,ASS1,C1R,C1S,C3,CASP1,CASP3,CBX6,CCL20,CD247,CD59,CLU,CPE,CXCL12,CXCL6,CYBA,DCN,ENPP2,F3,FAS,FN1,GLB1,GUCY1B1,ICAM1,IFI44,IFI44L,IFI6,IFIT2,IFITM1,IGFBP4,IRF8,ITGA3,LAMB1,LCN2,MEF2C,MIF,MMP9,MX1,MX2,NFKB1,OAS2,OAS3,OLFML2B,PCSK1N,PCSK5,RBP1,ROCK1,RXR A,SERPING1,SOD2,ST6GAL1,STAT1,TIMP1,TP53,TRIM22,VCAM1,VCAN,VEGFA,XAF1,YBX3                                                                                                                                                                                                                                                                                                                                                                                                                                                                                                                                                                                                                                                              |

|          |        |                         |           |        |        |       |          |          |                                                                                                                                                                                                                                                                                                                                                                                                                                                                                                                                                                                                                                                                                                                                                                                                                                                                                                                                                        |
|----------|--------|-------------------------|-----------|--------|--------|-------|----------|----------|--------------------------------------------------------------------------------------------------------------------------------------------------------------------------------------------------------------------------------------------------------------------------------------------------------------------------------------------------------------------------------------------------------------------------------------------------------------------------------------------------------------------------------------------------------------------------------------------------------------------------------------------------------------------------------------------------------------------------------------------------------------------------------------------------------------------------------------------------------------------------------------------------------------------------------------------------------|
| RB1      | 0,275  | transcription regulator | Inhibited | -4,906 | -4,887 | 0,002 | 8,74E-14 | 4,83E-12 | ACO2,ACTB,ALG5,ALPL,ATP6V1D,BARD1,BAX,BCKDHA,BNIP3,CALCRL,CASP3,CASP4,CASP6,CASP8,CCNA2,CCNB1,CCND1,CCND3,CDK1,CDKN1B,CDX2,CKM,CLDN3,CRADD,CYP27B1,DCK,DDB2,DDIT3,DEK,DLAT,DLST,DMPK,DNMT1,EED,EZH2,F3,FABP2,FAM11A,FANCL,FAS,FN1,FOS,FOSL1,FOXN1,FZD6,GADD45GIP1,GHITM,GPR162,GPS2,GRPEL1,HMGB2,HSBP1,ID1,IDH3B,KANK2,KRT10,KRT4,LCK,MAF,MAP2K3,MCAT,MCM2,MCM3,MCM5,MCM6,MCM7,MECR,MEF2C,MELK,MET,MFAP1,MLYCD,MMP2,MRPL58,MT1G,MTOR,MYB,MYOM2,NDUFA10,NDUFA2,NDUFA3,NDUFS2,NDUFS4,NDUFS7,NDUFV1,NIT1,NKX2-5,NME1,OPA1,P2RY14,PARP1,PBX3,PCLAF,PCNA,PGAM2,PGRMC1,PMPCB,POLD3,PPARGC1A,PPFIBP1,PPT2,PTGS1,RAB27A,RB1,RMI1,RRM1,RRM2,SDHB,SDHD,SH3BP2,SLC22A18AS,SMARCA5,SOD2,TERT,TG,TNNC1,TNNT2,TOBP1,TP53,TUBA1A,TUBG1,TXNIP,UBE2C,VEGFA,VRK1,WWH4E,7ER2,7MFR38                                                                                                                                                                                       |
| EP300    |        | transcription regulator |           | -0,737 | -0,682 | 0,008 | 9,52E-14 | 5,23E-12 | ACACB,ACADL,ACADM,AKAP12,AP3M2,B2M,BANK1,BAX,BCL6,BCLAF1,CA2,CAPG,CCND1,CCND3,CCR7,CD36,CD53,CD59,CDKN1B,CHPT1,CKM,COL1A2,COMT,CPT2,CST7,CXCR4,DDC,DHRS3,DIO1,DUSP1,DUSP22,EPN1,EVI2A,EVL,EYA2,FDX1,FN1,FNBP1,FNDC3B,FOS,FOXO1,G6PC,GIMAP4,GM2A,GPR18,HBB,HLA-B,HLA-G,HMGCS2,HSD11B2,ID1,ID2,ID3,IGFBP6,IL10RA,IL15RA,IL1R1,IL7R,ITGB2,KMO,LGALS3BP,LHB,MAF,MAPT,MCF2L,MCM3,MEF2C,MFHAS1,MMD,MME,MMP1,MMP7,MSH2,MYO1F,NDRG1,NOS2,NPPA,NR4A1,OAS3,PARP1,PCK1,PDE10A,PDK4,PDLIM4,PERP,PHIP,PIP,OX,PKLR,PLA2G4A,PLA2G7,PLEKHF1,PPARA,PPARGC1A,PRKCD,PRLR,PTEN,PTPRF,RB1,RBP1,RHOA,RNASEL,RORC,RSAD2,RT4,SDC1,SH2D1A,SMAD7,SOD2,SPSB1,ST6GAL1,STAT4,TBXAS1,TERT,TESC,TGFBR2,TIPARP,TLE2,TLR2,TMPRSS2,TMPRSS4,TNC,TP53,TRAT1,TRIM26,TXNIP,UBE2C,UTRN,VEGFA,WNT8B,XBP1                                                                                                                                                                                       |
| F2       | -0,163 | peptidase               | Activated | 3,522  | 3,605  | 0,009 | 1,18E-13 | 6,44E-12 | AKR1B1,ALDH1B1,BAX,BIRC2,BIRC3,CALR,CASP1,CASP3,CBR3,CLL20,CCL8,CCNA2,CCND1,CCND2,CD44,CD55,CD63,CDKN1B,CKAP4,CLIC1,CLU,COL1A1,COL4A1,CORO1C,COTL1,CTPS1,CXCL1,CXCL10,CXCR4,CYBB,CYP2B6,DHRS9,DKK3,DOCK10,DOK5,DUSP1,EHD4,ELL2,ESM1,F2RL1,F3,FHL1,FN1,FOS,FOSB,FOSL1,HIF1A,ICAM1,IFRD2,IGFBP4,IL13,IL15RA,IL32,MFHAS1,MIF,MMP1,MMP2,MMP9,MYH9,NCF2,NOS2,NR4A3,NUP62,PDGFRA,PDIA4,PLA2G4A,PROCR,RAB3A,RAC1,RAC2,RCAN1,RHOA,RHOB,SELP,SERPINC1,SLC16A5,SLIT2,SMTN,SOD2,SRGN,TAGLN2,TAP2,TFPI2,TIMP2,TMED9,TNFSF10,TNNT2,TXNRD2,VCAM1,VEGFA,VWF,ACE,ALOX5AP,APOA1,ARC,ATF3,BACE1,BAIAP2,BAX,CASP3,CASP6,CASP8,CAV1,CAVIN1,CCND1,CCND2,CCR2,CD44,CLU,COL1A1,COL1A2,CSHL1,CXCL6,CYP17A1,ENPEP,F3,FAS,FN1,FOSL1,FTL,FYN,GAD1,GADD45A,GADD45B,GNAS,HIF1A,HPGD,HPSE,ICAM1,ILD1,IL13,IL6R,ITGAM,JUND,LHB,LYZ,MAOB,ME1,MMP9,MTNR1A,MYB,NAB2,NDRG1,NFKB1,NR4A1,PNPLA2,PTEN,PTGES,RB1,SGK1,SLC12A2,SOD1,SOD2,SPP1,TGFBR2,TIAM1,TIMP1,TLR4,TNFSF10,TP53,VCAM1,VEGFA |
| EGR1     | -0,859 | transcription regulator |           | 0,566  | 0,620  | 0,007 | 1,23E-13 | 6,67E-12 | ADAM17,ANXA5,ARG2,ASS1,ATF3,BAX,BCL2A1,BNIP3,BNIP3L,CAV1,CCL5,CCL8,CCND1,CCND2,CCR7,CD1D,CD36,CD40,CD44,CD55,CD69,CD83,CD86,CDH5,CDX2,COL3A1,CTSK,CXCL1,CXCL10,CXCL11,CXCL12,CXCL6,CXCL9,CXCR4,CYBB,DDB2,DDC,DDIT3,DUSP1,F3,FAS,FLNA,FN1,FOS,GBP1,GCLC,GJA1,HIF1A,HSPA5,HTRA1,ICAM1,ID3,IL13,IL32,IRF7,ITGAM,ITGAV,ITGB2,ITGB3,ITGB8,JAM2,KDEL3,KLF15,MAL,MAP4K4,MEF2C,MIF,MMP1,MMP2,MMP9,MSH2,NFATC4,NFE2L2,NFKB1,NGF,NKX2-5,NOS2,NPPA,NR4A1,NR4A3,PCK1,PCNA,PLA2G4A,PLA2G7,POSTN,PPARGC1A,PPM1D,PTEN,PTPN12,RB1,RBP1,RCAN1,RHOB,RND3,SGK1,SMAD2,STAT1,TBP,TERT,TIMP1,TIMP2,TLR2,TNFSF10,TNNC1,TNNI1,TP53,ULK1,VCAM1,VDR,VEGFA,VEGFC,VLDLR,7FP3A,7MAT3                                                                                                                                                                                                                                                                                                |
| P38 MAPK |        | group                   | Activated | 2,249  | 2,325  | 0,008 | 1,54E-13 | 8,19E-12 | ATP5MC2,C1QA,CCR2,CCR5,CD44,CD74,CLEC7A,COX15,COX6A2,COX8A,CXCL10,CYBA,CYBB,CYC1,FN1,FTL,HIF1A,ICAM1,IL10RA,IL2RB,IL2RG,ITGAM,LTB,LY86,NCF2,NDUFA3,NDUFA7,NDUFB11,NDUFB7,NDUFC1,NDUFS3,NDUFS4,NDUFS7,NDUFS8,NDUFS11,PECAM1,PRLR,SERPINF2,SURF1,TLR2,UCP2,UQCRC1,UQCRC2,VCAM1,VEGFC                                                                                                                                                                                                                                                                                                                                                                                                                                                                                                                                                                                                                                                                     |
| Hbb-b1   |        | transporter             |           | -1,099 | -1,048 | 0,008 | 1,66E-13 | 8,73E-12 |                                                                                                                                                                                                                                                                                                                                                                                                                                                                                                                                                                                                                                                                                                                                                                                                                                                                                                                                                        |

|               |        |                                 |           |        |        |        |          |          |                                                                                                                                                                                                                                                                                                                                                                                                                                                                                                                                                                                                                                                                                                                                                                                                                                                                                                                                                                                                                                                                                                                                                                                                                                                                                                                                                                                                                                                                                                                                                                                                                                                                                                                                                                                                                                                                                                                                                                                                                                                                                                                                                                                                                                                                                                                                                                                                                                                                                                                                                                                                                                                                                                                                                                                                                                                                                                                                                                                                                                                                                                                                                                                                                                                                                                                                                                                                                                                                                                                                                                                                                                                                                                                                                                                                                                                                                                                                                                                                                                                                                                                                                                                                                                                                                                                                                                                                                                                                                                                                                                                                                                                                                                                                                                                                                                                                                                                                                                                                                                                                                                                                                                                                                                                                                                                                                                                                                                                                                                                                                                                                                                                                                                                                                                                                                                                                                                                                                                                                                                                                                                                                                                                                                                                                                                                                                                                                                                                                                                                                                                                                                                                                                                                                                                                                                                                                                                                                                                                                                                                                                                                                                                                                                                                                                                                                                                                                                                                                                                                                                                                                                                                                                                                                                                                                                                                                                                                                                                                                                                                                                                                                                                                                                                                                                                                                                                                                                                                                                                                                                                                                                                                                                                                                                                                                                                                                                                                                                                                                                                                                                                                                                                                                                                                                                                                             |
|---------------|--------|---------------------------------|-----------|--------|--------|--------|----------|----------|-----------------------------------------------------------------------------------------------------------------------------------------------------------------------------------------------------------------------------------------------------------------------------------------------------------------------------------------------------------------------------------------------------------------------------------------------------------------------------------------------------------------------------------------------------------------------------------------------------------------------------------------------------------------------------------------------------------------------------------------------------------------------------------------------------------------------------------------------------------------------------------------------------------------------------------------------------------------------------------------------------------------------------------------------------------------------------------------------------------------------------------------------------------------------------------------------------------------------------------------------------------------------------------------------------------------------------------------------------------------------------------------------------------------------------------------------------------------------------------------------------------------------------------------------------------------------------------------------------------------------------------------------------------------------------------------------------------------------------------------------------------------------------------------------------------------------------------------------------------------------------------------------------------------------------------------------------------------------------------------------------------------------------------------------------------------------------------------------------------------------------------------------------------------------------------------------------------------------------------------------------------------------------------------------------------------------------------------------------------------------------------------------------------------------------------------------------------------------------------------------------------------------------------------------------------------------------------------------------------------------------------------------------------------------------------------------------------------------------------------------------------------------------------------------------------------------------------------------------------------------------------------------------------------------------------------------------------------------------------------------------------------------------------------------------------------------------------------------------------------------------------------------------------------------------------------------------------------------------------------------------------------------------------------------------------------------------------------------------------------------------------------------------------------------------------------------------------------------------------------------------------------------------------------------------------------------------------------------------------------------------------------------------------------------------------------------------------------------------------------------------------------------------------------------------------------------------------------------------------------------------------------------------------------------------------------------------------------------------------------------------------------------------------------------------------------------------------------------------------------------------------------------------------------------------------------------------------------------------------------------------------------------------------------------------------------------------------------------------------------------------------------------------------------------------------------------------------------------------------------------------------------------------------------------------------------------------------------------------------------------------------------------------------------------------------------------------------------------------------------------------------------------------------------------------------------------------------------------------------------------------------------------------------------------------------------------------------------------------------------------------------------------------------------------------------------------------------------------------------------------------------------------------------------------------------------------------------------------------------------------------------------------------------------------------------------------------------------------------------------------------------------------------------------------------------------------------------------------------------------------------------------------------------------------------------------------------------------------------------------------------------------------------------------------------------------------------------------------------------------------------------------------------------------------------------------------------------------------------------------------------------------------------------------------------------------------------------------------------------------------------------------------------------------------------------------------------------------------------------------------------------------------------------------------------------------------------------------------------------------------------------------------------------------------------------------------------------------------------------------------------------------------------------------------------------------------------------------------------------------------------------------------------------------------------------------------------------------------------------------------------------------------------------------------------------------------------------------------------------------------------------------------------------------------------------------------------------------------------------------------------------------------------------------------------------------------------------------------------------------------------------------------------------------------------------------------------------------------------------------------------------------------------------------------------------------------------------------------------------------------------------------------------------------------------------------------------------------------------------------------------------------------------------------------------------------------------------------------------------------------------------------------------------------------------------------------------------------------------------------------------------------------------------------------------------------------------------------------------------------------------------------------------------------------------------------------------------------------------------------------------------------------------------------------------------------------------------------------------------------------------------------------------------------------------------------------------------------------------------------------------------------------------------------------------------------------------------------------------------------------------------------------------------------------------------------------------------------------------------------------------------------------------------------------------------------------------------------------------------------------------------------------------------------------------------------------------------------------------------------------------------------------------------------------------------------------------------------------------------------------------------------------------------------------------------------------------------------------------------------------------------------------------------------------------------------------------------------------------------------------------------------------------------------------------------------------------------------------------------------------------------------------------------------------------------------------------------------------------------------------------------------------------------------------------------------------------|
| HTT           |        | transcription regulator         | Activated | 2,670  | 2,683  | 0,002  | 2,76E-13 | 1,40E-11 | ABCC10,ACADM,ACKR1,AGRN,AKAP12,APOA1,APOE,AQP1,ATF3,ATP1A3,ATP6V0E2,AVP,AZIN1,B2M,B4GAT1,BAIAP2,BASP1,BCL6,BHLHE40,BID,BIRC2,C1R,CA4,CACNA2D3,CALML4,CAMK2A,CASP1,CASP3,CAST,CAVIN3,CCL5,CCND1,CD74,CD9,CDH11,CDHR5,CDK2AP1,CDK5,CHUK,CKM,CLCN1,CLDN1,COL16A1,COL18A1,COL4A1,COL4A2,COL6A3,COX15,COX6A2,CSF1R,CTSD,CYC1,CYFIP2,DCN,DDIT3,DDX50,DHCR7,DKK3,DLG3,DLST,DNAJB1,ECI1,EMP3,ENO3,ENPP2,EPB41L3,ETNPPL,EVL,FGF1,FHL1,FKBP4,FN1,FOLR1,FOS,FOSL1,GAD1,GADD45G,GCLC,GLUL,GNB5,GNG7,GPX3,GRK2,GRK5,GSR,GSS,HIF1A,HMGB2,HOXB1,HOXB2,HPCAL1,HSPA5,HSPA8,HSPA9,IFI16,IL15,KCNJ2,KL,KLF9,LTF,MAST3,MCAM,MDH2,MEIS2,MGP,MICU1,MLF2,MMP2,MTNR1A,MTOR,NAB2,NCS1,NDUFA3,NDUFA7,NDUFS3,NDUFS4,NDUFS7,NFE2L2,NFIL3,NOS2,NR4A1,NSF,NTRK2,OSBP18,OXT,PC,PCNA,PCTP,PDE10A,PKD2,PKK3,PDLIM4,PEA15,PER1,PFN1,POR,PPARA,PPARGC1A,PPP1R16B,PRKACB,PRKCD,PROM1,PSMB8,PSMB9,PSME1,PVALB,RAB17,RNF34,SDHB,SERPINA3,SERPINF1,SERPINF1,SFRP1,SGK1,SIRT3,SLC12A2,SLC1A3,SNN,SOC2,SOD1,SOD2,SP3,SPP1,SST,STAT1,STMN1,STX4,STXBP1,TAC1,TESC,TGFB1,THBS2,THR3,THRB,TIAM1,TM4SF1,TP53,TPI1,TRAP1,TUBB,TYRO3,UCHL1,UQCR11,USP2,VCAM1,VCAM2,VCAM3,VCAM4,VCAM5,VCAM6,VCAM7,VCAM8,VCAM9,VCAM10,VCAM11,VCAM12,VCAM13,VCAM14,VCAM15,VCAM16,VCAM17,VCAM18,VCAM19,VCAM20,VCAM21,VCAM22,VCAM23,VCAM24,VCAM25,VCAM26,VCAM27,VCAM28,VCAM29,VCAM30,VCAM31,VCAM32,VCAM33,VCAM34,VCAM35,VCAM36,VCAM37,VCAM38,VCAM39,VCAM40,VCAM41,VCAM42,VCAM43,VCAM44,VCAM45,VCAM46,VCAM47,VCAM48,VCAM49,VCAM50,VCAM51,VCAM52,VCAM53,VCAM54,VCAM55,VCAM56,VCAM57,VCAM58,VCAM59,VCAM60,VCAM61,VCAM62,VCAM63,VCAM64,VCAM65,VCAM66,VCAM67,VCAM68,VCAM69,VCAM70,VCAM71,VCAM72,VCAM73,VCAM74,VCAM75,VCAM76,VCAM77,VCAM78,VCAM79,VCAM80,VCAM81,VCAM82,VCAM83,VCAM84,VCAM85,VCAM86,VCAM87,VCAM88,VCAM89,VCAM90,VCAM91,VCAM92,VCAM93,VCAM94,VCAM95,VCAM96,VCAM97,VCAM98,VCAM99,VCAM100,VCAM101,VCAM102,VCAM103,VCAM104,VCAM105,VCAM106,VCAM107,VCAM108,VCAM109,VCAM110,VCAM111,VCAM112,VCAM113,VCAM114,VCAM115,VCAM116,VCAM117,VCAM118,VCAM119,VCAM120,VCAM121,VCAM122,VCAM123,VCAM124,VCAM125,VCAM126,VCAM127,VCAM128,VCAM129,VCAM130,VCAM131,VCAM132,VCAM133,VCAM134,VCAM135,VCAM136,VCAM137,VCAM138,VCAM139,VCAM140,VCAM141,VCAM142,VCAM143,VCAM144,VCAM145,VCAM146,VCAM147,VCAM148,VCAM149,VCAM150,VCAM151,VCAM152,VCAM153,VCAM154,VCAM155,VCAM156,VCAM157,VCAM158,VCAM159,VCAM160,VCAM161,VCAM162,VCAM163,VCAM164,VCAM165,VCAM166,VCAM167,VCAM168,VCAM169,VCAM170,VCAM171,VCAM172,VCAM173,VCAM174,VCAM175,VCAM176,VCAM177,VCAM178,VCAM179,VCAM180,VCAM181,VCAM182,VCAM183,VCAM184,VCAM185,VCAM186,VCAM187,VCAM188,VCAM189,VCAM190,VCAM191,VCAM192,VCAM193,VCAM194,VCAM195,VCAM196,VCAM197,VCAM198,VCAM199,VCAM200,VCAM201,VCAM202,VCAM203,VCAM204,VCAM205,VCAM206,VCAM207,VCAM208,VCAM209,VCAM210,VCAM211,VCAM212,VCAM213,VCAM214,VCAM215,VCAM216,VCAM217,VCAM218,VCAM219,VCAM220,VCAM221,VCAM222,VCAM223,VCAM224,VCAM225,VCAM226,VCAM227,VCAM228,VCAM229,VCAM230,VCAM231,VCAM232,VCAM233,VCAM234,VCAM235,VCAM236,VCAM237,VCAM238,VCAM239,VCAM240,VCAM241,VCAM242,VCAM243,VCAM244,VCAM245,VCAM246,VCAM247,VCAM248,VCAM249,VCAM250,VCAM251,VCAM252,VCAM253,VCAM254,VCAM255,VCAM256,VCAM257,VCAM258,VCAM259,VCAM260,VCAM261,VCAM262,VCAM263,VCAM264,VCAM265,VCAM266,VCAM267,VCAM268,VCAM269,VCAM270,VCAM271,VCAM272,VCAM273,VCAM274,VCAM275,VCAM276,VCAM277,VCAM278,VCAM279,VCAM280,VCAM281,VCAM282,VCAM283,VCAM284,VCAM285,VCAM286,VCAM287,VCAM288,VCAM289,VCAM290,VCAM291,VCAM292,VCAM293,VCAM294,VCAM295,VCAM296,VCAM297,VCAM298,VCAM299,VCAM300,VCAM301,VCAM302,VCAM303,VCAM304,VCAM305,VCAM306,VCAM307,VCAM308,VCAM309,VCAM310,VCAM311,VCAM312,VCAM313,VCAM314,VCAM315,VCAM316,VCAM317,VCAM318,VCAM319,VCAM320,VCAM321,VCAM322,VCAM323,VCAM324,VCAM325,VCAM326,VCAM327,VCAM328,VCAM329,VCAM330,VCAM331,VCAM332,VCAM333,VCAM334,VCAM335,VCAM336,VCAM337,VCAM338,VCAM339,VCAM340,VCAM341,VCAM342,VCAM343,VCAM344,VCAM345,VCAM346,VCAM347,VCAM348,VCAM349,VCAM350,VCAM351,VCAM352,VCAM353,VCAM354,VCAM355,VCAM356,VCAM357,VCAM358,VCAM359,VCAM360,VCAM361,VCAM362,VCAM363,VCAM364,VCAM365,VCAM366,VCAM367,VCAM368,VCAM369,VCAM370,VCAM371,VCAM372,VCAM373,VCAM374,VCAM375,VCAM376,VCAM377,VCAM378,VCAM379,VCAM380,VCAM381,VCAM382,VCAM383,VCAM384,VCAM385,VCAM386,VCAM387,VCAM388,VCAM389,VCAM390,VCAM391,VCAM392,VCAM393,VCAM394,VCAM395,VCAM396,VCAM397,VCAM398,VCAM399,VCAM400,VCAM401,VCAM402,VCAM403,VCAM404,VCAM405,VCAM406,VCAM407,VCAM408,VCAM409,VCAM410,VCAM411,VCAM412,VCAM413,VCAM414,VCAM415,VCAM416,VCAM417,VCAM418,VCAM419,VCAM420,VCAM421,VCAM422,VCAM423,VCAM424,VCAM425,VCAM426,VCAM427,VCAM428,VCAM429,VCAM430,VCAM431,VCAM432,VCAM433,VCAM434,VCAM435,VCAM436,VCAM437,VCAM438,VCAM439,VCAM440,VCAM441,VCAM442,VCAM443,VCAM444,VCAM445,VCAM446,VCAM447,VCAM448,VCAM449,VCAM450,VCAM451,VCAM452,VCAM453,VCAM454,VCAM455,VCAM456,VCAM457,VCAM458,VCAM459,VCAM460,VCAM461,VCAM462,VCAM463,VCAM464,VCAM465,VCAM466,VCAM467,VCAM468,VCAM469,VCAM470,VCAM471,VCAM472,VCAM473,VCAM474,VCAM475,VCAM476,VCAM477,VCAM478,VCAM479,VCAM480,VCAM481,VCAM482,VCAM483,VCAM484,VCAM485,VCAM486,VCAM487,VCAM488,VCAM489,VCAM490,VCAM491,VCAM492,VCAM493,VCAM494,VCAM495,VCAM496,VCAM497,VCAM498,VCAM499,VCAM500,VCAM501,VCAM502,VCAM503,VCAM504,VCAM505,VCAM506,VCAM507,VCAM508,VCAM509,VCAM510,VCAM511,VCAM512,VCAM513,VCAM514,VCAM515,VCAM516,VCAM517,VCAM518,VCAM519,VCAM520,VCAM521,VCAM522,VCAM523,VCAM524,VCAM525,VCAM526,VCAM527,VCAM528,VCAM529,VCAM530,VCAM531,VCAM532,VCAM533,VCAM534,VCAM535,VCAM536,VCAM537,VCAM538,VCAM539,VCAM540,VCAM541,VCAM542,VCAM543,VCAM544,VCAM545,VCAM546,VCAM547,VCAM548,VCAM549,VCAM550,VCAM551,VCAM552,VCAM553,VCAM554,VCAM555,VCAM556,VCAM557,VCAM558,VCAM559,VCAM560,VCAM561,VCAM562,VCAM563,VCAM564,VCAM565,VCAM566,VCAM567,VCAM568,VCAM569,VCAM570,VCAM571,VCAM572,VCAM573,VCAM574,VCAM575,VCAM576,VCAM577,VCAM578,VCAM579,VCAM580,VCAM581,VCAM582,VCAM583,VCAM584,VCAM585,VCAM586,VCAM587,VCAM588,VCAM589,VCAM590,VCAM591,VCAM592,VCAM593,VCAM594,VCAM595,VCAM596,VCAM597,VCAM598,VCAM599,VCAM600,VCAM601,VCAM602,VCAM603,VCAM604,VCAM605,VCAM606,VCAM607,VCAM608,VCAM609,VCAM610,VCAM611,VCAM612,VCAM613,VCAM614,VCAM615,VCAM616,VCAM617,VCAM618,VCAM619,VCAM620,VCAM621,VCAM622,VCAM623,VCAM624,VCAM625,VCAM626,VCAM627,VCAM628,VCAM629,VCAM630,VCAM631,VCAM632,VCAM633,VCAM634,VCAM635,VCAM636,VCAM637,VCAM638,VCAM639,VCAM640,VCAM641,VCAM642,VCAM643,VCAM644,VCAM645,VCAM646,VCAM647,VCAM648,VCAM649,VCAM650,VCAM651,VCAM652,VCAM653,VCAM654,VCAM655,VCAM656,VCAM657,VCAM658,VCAM659,VCAM660,VCAM661,VCAM662,VCAM663,VCAM664,VCAM665,VCAM666,VCAM667,VCAM668,VCAM669,VCAM670,VCAM671,VCAM672,VCAM673,VCAM674,VCAM675,VCAM676,VCAM677,VCAM678,VCAM679,VCAM680,VCAM681,VCAM682,VCAM683,VCAM684,VCAM685,VCAM686,VCAM687,VCAM688,VCAM689,VCAM690,VCAM691,VCAM692,VCAM693,VCAM694,VCAM695,VCAM696,VCAM697,VCAM698,VCAM699,VCAM700,VCAM701,VCAM702,VCAM703,VCAM704,VCAM705,VCAM706,VCAM707,VCAM708,VCAM709,VCAM710,VCAM711,VCAM712,VCAM713,VCAM714,VCAM715,VCAM716,VCAM717,VCAM718,VCAM719,VCAM720,VCAM721,VCAM722,VCAM723,VCAM724,VCAM725,VCAM726,VCAM727,VCAM728,VCAM729,VCAM730,VCAM731,VCAM732,VCAM733,VCAM734,VCAM735,VCAM736,VCAM737,VCAM738,VCAM739,VCAM740,VCAM741,VCAM742,VCAM743,VCAM744,VCAM745,VCAM746,VCAM747,VCAM748,VCAM749,VCAM750,VCAM751,VCAM752,VCAM753,VCAM754,VCAM755,VCAM756,VCAM757,VCAM758,VCAM759,VCAM760,VCAM761,VCAM762,VCAM763,VCAM764,VCAM765,VCAM766,VCAM767,VCAM768,VCAM769,VCAM770,VCAM771,VCAM772,VCAM773,VCAM774,VCAM775,VCAM776,VCAM777,VCAM778,VCAM779,VCAM780,VCAM781,VCAM782,VCAM783,VCAM784,VCAM785,VCAM786,VCAM787,VCAM788,VCAM789,VCAM790,VCAM791,VCAM792,VCAM793,VCAM794,VCAM795,VCAM796,VCAM797,VCAM798,VCAM799,VCAM800,VCAM801,VCAM802,VCAM803,VCAM804,VCAM805,VCAM806,VCAM807,VCAM808,VCAM809,VCAM810,VCAM811,VCAM812,VCAM813,VCAM814,VCAM815,VCAM816,VCAM817,VCAM818,VCAM819,VCAM820,VCAM821,VCAM822,VCAM823,VCAM824,VCAM825,VCAM826,VCAM827,VCAM828,VCAM829,VCAM830,VCAM831,VCAM832,VCAM833,VCAM834,VCAM835,VCAM836,VCAM837,VCAM838,VCAM839,VCAM840,VCAM841,VCAM842,VCAM843,VCAM844,VCAM845,VCAM846,VCAM847,VCAM848,VCAM849,VCAM850,VCAM851,VCAM852,VCAM853,VCAM854,VCAM855,VCAM856,VCAM857,VCAM858,VCAM859,VCAM860,VCAM861,VCAM862,VCAM863,VCAM864,VCAM865,VCAM866,VCAM867,VCAM868,VCAM869,VCAM870,VCAM871,VCAM872,VCAM873,VCAM874,VCAM875,VCAM876,VCAM877,VCAM878,VCAM879,VCAM880,VCAM881,VCAM882,VCAM883,VCAM884,VCAM885,VCAM886,VCAM887,VCAM888,VCAM889,VCAM890,VCAM891,VCAM892,VCAM893,VCAM894,VCAM895,VCAM896,VCAM897,VCAM898,VCAM899,VCAM900,VCAM901,VCAM902,VCAM903,VCAM904,VCAM905,VCAM906,VCAM907,VCAM908,VCAM909,VCAM910,VCAM911,VCAM912,VCAM913,VCAM914,VCAM915,VCAM916,VCAM917,VCAM918,VCAM919,VCAM920,VCAM921,VCAM922,VCAM923,VCAM924,VCAM925,VCAM926,VCAM927,VCAM928,VCAM929,VCAM930,VCAM931,VCAM932,VCAM933,VCAM934,VCAM935,VCAM936,VCAM937,VCAM938,VCAM939,VCAM940,VCAM941,VCAM942,VCAM943,VCAM944,VCAM945,VCAM946,VCAM947,VCAM948,VCAM949,VCAM950,VCAM951,VCAM952,VCAM953,VCAM954,VCAM955,VCAM956,VCAM957,VCAM958,VCAM959,VCAM960,VCAM961,VCAM962,VCAM963,VCAM964,VCAM965,VCAM966,VCAM967,VCAM968,VCAM969,VCAM970,VCAM971,VCAM972,VCAM973,VCAM974,VCAM975,VCAM976,VCAM977,VCAM978,VCAM979,VCAM980,VCAM981,VCAM982,VCAM983,VCAM984,VCAM985,VCAM986,VCAM987,VCAM988,VCAM989,VCAM990,VCAM991,VCAM992,VCAM993,VCAM994,VCAM995,VCAM996,VCAM997,VCAM998,VCAM999,VCAM1000 |
| CXCL12        | 0,814  | cytokine                        |           | 1,892  | 1,940  | 0,006  | 3,14E-13 | 1,57E-11 | ADAM17,AFP,ARAF,AVP,AXL,BAX,CA2,CCL5,CCND1,CD14,CD36,CD3G,CD44,CD47,CD69,CD9,CDKN1C,COL1A1,CTSK,CXCL10,CXCL12,CXCR4,CYP2A6 (includes others),DMPK,DPP4,FAS,FLNA,FN1,FOS,FYN,GAD1,GAS2,GSR,HC,LS1,HIPK3,ICAM1,ID1,IFI27,IFNAR2,IFNGR2,IGFBP7,ITGAL,ITGB3,LCP2,MAPK12,MAPK8IP2,MARCKS,MMP2,MMP9,MSH6,NCK1,NPHS1,NR2F6,NR4A1,PCDH1,PPEF1,PRKCD,ROCK1,RRAS,RUNX3,SOC2,SORBS3,TAC1,TIMP1,TNFRSF10D,TNFRSF11B,TNFRSF1B,TNFSF10,TNNT1,TP53,VIM,XRCC5                                                                                                                                                                                                                                                                                                                                                                                                                                                                                                                                                                                                                                                                                                                                                                                                                                                                                                                                                                                                                                                                                                                                                                                                                                                                                                                                                                                                                                                                                                                                                                                                                                                                                                                                                                                                                                                                                                                                                                                                                                                                                                                                                                                                                                                                                                                                                                                                                                                                                                                                                                                                                                                                                                                                                                                                                                                                                                                                                                                                                                                                                                                                                                                                                                                                                                                                                                                                                                                                                                                                                                                                                                                                                                                                                                                                                                                                                                                                                                                                                                                                                                                                                                                                                                                                                                                                                                                                                                                                                                                                                                                                                                                                                                                                                                                                                                                                                                                                                                                                                                                                                                                                                                                                                                                                                                                                                                                                                                                                                                                                                                                                                                                                                                                                                                                                                                                                                                                                                                                                                                                                                                                                                                                                                                                                                                                                                                                                                                                                                                                                                                                                                                                                                                                                                                                                                                                                                                                                                                                                                                                                                                                                                                                                                                                                                                                                                                                                                                                                                                                                                                                                                                                                                                                                                                                                                                                                                                                                                                                                                                                                                                                                                                                                                                                                                                                                                                                                                                                                                                                                                                                                                                                                                                                                                                                                                                                                               |
| palmitic acid |        | chemical - endogenous mammalian |           | -0,224 | -0,191 | 0,004  | 3,94E-13 | 1,96E-11 | ACAA1,ACACA,ACADL,ACADM,ACSL1,AHR,APOM,ATF3,BACE1,BAX,BIRC3,CASP3,CCL19,CCL5,CD36,CD86,CKM,CPE,CTSB,CXCL10,CYBA,CYBB,CYP4F12,CYP4F2,DDIT3,ELOVL6,EPHX2,F2RL1,FABP1,FABP2,FN1,FOLR2,FOS,FOXO1,G6PC,GCLC,HNF1A,HNF4A,HSPA5,HTR2B,ICAM1,IDO1,IL6R,INSR,LCN2,MAFB,MET,MLXIPL,MTOR,NCF2,NCF4,NFE2L2,NOS2,NR4A1,NR4A3,PCK1,PKK4,PKLR,P LIN2,PMVK,PNPLA2,PNPLA3,PPARA,PPARGC1A,PROC,PTEN,SCD,SLC25A1,SLC2A2,TLR2,TLR4,TNFSF10,TP53,TRIB3,TXNIP,UCHL1,UCP2,VCAM1,XBP1                                                                                                                                                                                                                                                                                                                                                                                                                                                                                                                                                                                                                                                                                                                                                                                                                                                                                                                                                                                                                                                                                                                                                                                                                                                                                                                                                                                                                                                                                                                                                                                                                                                                                                                                                                                                                                                                                                                                                                                                                                                                                                                                                                                                                                                                                                                                                                                                                                                                                                                                                                                                                                                                                                                                                                                                                                                                                                                                                                                                                                                                                                                                                                                                                                                                                                                                                                                                                                                                                                                                                                                                                                                                                                                                                                                                                                                                                                                                                                                                                                                                                                                                                                                                                                                                                                                                                                                                                                                                                                                                                                                                                                                                                                                                                                                                                                                                                                                                                                                                                                                                                                                                                                                                                                                                                                                                                                                                                                                                                                                                                                                                                                                                                                                                                                                                                                                                                                                                                                                                                                                                                                                                                                                                                                                                                                                                                                                                                                                                                                                                                                                                                                                                                                                                                                                                                                                                                                                                                                                                                                                                                                                                                                                                                                                                                                                                                                                                                                                                                                                                                                                                                                                                                                                                                                                                                                                                                                                                                                                                                                                                                                                                                                                                                                                                                                                                                                                                                                                                                                                                                                                                                                                                                                                                                                                                                                                               |
| IRF2          | 0,260  | transcription regulator         |           | 1,184  | 1,219  | 0,005  | 5,23E-13 | 2,59E-11 | ANG,B2M,BNIP3L,C1S,CASP1,CCND1,CD14,CDKN1B,CFB,CIDEA,CLC10A,CLIC1,CTSS,CXCL10,DY19L1,ERAP1,FAM111A,GBP1,HGD,ID1,IDH1,IFI35,IL7,IRF1,IRF7,IRF8,ISG15,LCN2,MMP7,MYH9,NAMPT,NOS2,OAS1,PFKFB3,PSMB10,PSMB8,PSMB9,PSME1,RARRES1,SDC1,SETD3,SRGN,SUPT16H,TAP1,TAP2,TAPBP,TLR3,TLR4,TLR5,TNFSF10,TPM1,TRIM21,UBE2L6,VCAM1                                                                                                                                                                                                                                                                                                                                                                                                                                                                                                                                                                                                                                                                                                                                                                                                                                                                                                                                                                                                                                                                                                                                                                                                                                                                                                                                                                                                                                                                                                                                                                                                                                                                                                                                                                                                                                                                                                                                                                                                                                                                                                                                                                                                                                                                                                                                                                                                                                                                                                                                                                                                                                                                                                                                                                                                                                                                                                                                                                                                                                                                                                                                                                                                                                                                                                                                                                                                                                                                                                                                                                                                                                                                                                                                                                                                                                                                                                                                                                                                                                                                                                                                                                                                                                                                                                                                                                                                                                                                                                                                                                                                                                                                                                                                                                                                                                                                                                                                                                                                                                                                                                                                                                                                                                                                                                                                                                                                                                                                                                                                                                                                                                                                                                                                                                                                                                                                                                                                                                                                                                                                                                                                                                                                                                                                                                                                                                                                                                                                                                                                                                                                                                                                                                                                                                                                                                                                                                                                                                                                                                                                                                                                                                                                                                                                                                                                                                                                                                                                                                                                                                                                                                                                                                                                                                                                                                                                                                                                                                                                                                                                                                                                                                                                                                                                                                                                                                                                                                                                                                                                                                                                                                                                                                                                                                                                                                                                                                                                                                                                          |
| CD38          | 0,912  | enzyme                          |           | 0,590  | 0,659  | 0,009  | 6,01E-13 | 2,94E-11 | ANXA2,ASNS,ASS1,BCL6,BNIP3,BNIP3L,CCND2,CD44,CD86,CHST12,CISH,CKAP4,CLCN3,COL1A1,CRELD2,CRIP1,CSF2RB,EAF2,ELL2,ENDOG,FGL2,FN1,GADD45G,GALK1,GBP2,GCAT,ICAM1,IFI30,IL6R,JCHAIN,KCNAB2,KLHDC2,LGALS,MANF,NDRG1,NFIL3,P4HA1,PDI6,PDLIM1,PFL,PFLK,PGM1,PKM,PPARGC1A,PRDX4,PSAT1,RBPMS,RRAS2,S100A4,S100A6,SDC1,SDF2L1,SELL,SLC16A3,SOC2,ST7,STK39,THY1,TPI1,UPB1,VCAM1,VIM,XBP1                                                                                                                                                                                                                                                                                                                                                                                                                                                                                                                                                                                                                                                                                                                                                                                                                                                                                                                                                                                                                                                                                                                                                                                                                                                                                                                                                                                                                                                                                                                                                                                                                                                                                                                                                                                                                                                                                                                                                                                                                                                                                                                                                                                                                                                                                                                                                                                                                                                                                                                                                                                                                                                                                                                                                                                                                                                                                                                                                                                                                                                                                                                                                                                                                                                                                                                                                                                                                                                                                                                                                                                                                                                                                                                                                                                                                                                                                                                                                                                                                                                                                                                                                                                                                                                                                                                                                                                                                                                                                                                                                                                                                                                                                                                                                                                                                                                                                                                                                                                                                                                                                                                                                                                                                                                                                                                                                                                                                                                                                                                                                                                                                                                                                                                                                                                                                                                                                                                                                                                                                                                                                                                                                                                                                                                                                                                                                                                                                                                                                                                                                                                                                                                                                                                                                                                                                                                                                                                                                                                                                                                                                                                                                                                                                                                                                                                                                                                                                                                                                                                                                                                                                                                                                                                                                                                                                                                                                                                                                                                                                                                                                                                                                                                                                                                                                                                                                                                                                                                                                                                                                                                                                                                                                                                                                                                                                                                                                                                                                 |
| IFN Beta      |        | group                           | Activated | 4,888  | 4,941  | 0,007  | 8,28E-13 | 3,98E-11 | ATF3,BST2,C3AR1,CASP4,CCL5,CCR7,CD247,CD40,CD69,CD74,CD83,CD86,CXCL1,CXCL10,CXCL11,CYP3A4,DDX58,DPP4,DUSP1,ENPEP,FN1,HLA-A,HLA-B,HLA-C,IDO1,IFI16,IFI27,IFI35,IFI44,IFI6,IFIH1,IFIT2,IFIT3,IFITM1,IFNAR2,IL15,IL15RA,IRF1,IRF7,IRF9,ISG15,MMP9,MX1,MX2,NOS2,OAS1,OAS2,OAS3,PRKCA,RSAD2,SPRY1,SPRY2,STAT1,TAPBP,TLR3,TNFSF10,TP53,XAF1                                                                                                                                                                                                                                                                                                                                                                                                                                                                                                                                                                                                                                                                                                                                                                                                                                                                                                                                                                                                                                                                                                                                                                                                                                                                                                                                                                                                                                                                                                                                                                                                                                                                                                                                                                                                                                                                                                                                                                                                                                                                                                                                                                                                                                                                                                                                                                                                                                                                                                                                                                                                                                                                                                                                                                                                                                                                                                                                                                                                                                                                                                                                                                                                                                                                                                                                                                                                                                                                                                                                                                                                                                                                                                                                                                                                                                                                                                                                                                                                                                                                                                                                                                                                                                                                                                                                                                                                                                                                                                                                                                                                                                                                                                                                                                                                                                                                                                                                                                                                                                                                                                                                                                                                                                                                                                                                                                                                                                                                                                                                                                                                                                                                                                                                                                                                                                                                                                                                                                                                                                                                                                                                                                                                                                                                                                                                                                                                                                                                                                                                                                                                                                                                                                                                                                                                                                                                                                                                                                                                                                                                                                                                                                                                                                                                                                                                                                                                                                                                                                                                                                                                                                                                                                                                                                                                                                                                                                                                                                                                                                                                                                                                                                                                                                                                                                                                                                                                                                                                                                                                                                                                                                                                                                                                                                                                                                                                                                                                                                                       |
| APOE          | -0,901 | transporter                     | Inhibited | -2,523 | -2,558 | -0,006 | 1,00E-12 | 4,78E-11 | ACAT1,ACOX1,ACSL1,ACTB,ADAM10,ADGRG1,ADNP,ANXA11,APOA1,APOE,ATF3,BAX,BEGAIN,C1QA,C1QB,C2,C3AR1,CALR,CASP1,CASP3,CAT,CAV1,CCL5,CCND1,CCND2,CCR5,CD36,CD40,CD44,CD86,CLU,COL18A1,COL1A1,CTSB,CTSD,CTSK,CTSS,CTSV,CYBB,DDIT3,ESR1,F2RL1,F3,FCGR2B,FKBP4,FKBP5,FOS,GLUL,GPX3,HABP2,HPCAL1,HSP90B1,HSPA5,ICAM1,IGFBP6,IL10RA,IL10RB,INSR,ITGA3,ITGAM,JAK1,LCN2,LIPA,MAP2K3,MAP3K1,MAPT,MGP,MMP2,MMP9,MYLIP,MYO1B,NCF2,NOS2,NOX4,NQO2,NR1H3,P4HB,PC,PEA15,PHF21A,PPP1R15A,PRKCC,PRPSAP2,PTGES,S100A8,S100A9,SERPINA3,SLC25A4,SMAD1,SOD1,SOD2,SPP1,STAT4,T CIRG1,THY1,TIAM1,TIMP1,TREM2,TXNIP,UCP2,VCAM1,WBP2,XBP1                                                                                                                                                                                                                                                                                                                                                                                                                                                                                                                                                                                                                                                                                                                                                                                                                                                                                                                                                                                                                                                                                                                                                                                                                                                                                                                                                                                                                                                                                                                                                                                                                                                                                                                                                                                                                                                                                                                                                                                                                                                                                                                                                                                                                                                                                                                                                                                                                                                                                                                                                                                                                                                                                                                                                                                                                                                                                                                                                                                                                                                                                                                                                                                                                                                                                                                                                                                                                                                                                                                                                                                                                                                                                                                                                                                                                                                                                                                                                                                                                                                                                                                                                                                                                                                                                                                                                                                                                                                                                                                                                                                                                                                                                                                                                                                                                                                                                                                                                                                                                                                                                                                                                                                                                                                                                                                                                                                                                                                                                                                                                                                                                                                                                                                                                                                                                                                                                                                                                                                                                                                                                                                                                                                                                                                                                                                                                                                                                                                                                                                                                                                                                                                                                                                                                                                                                                                                                                                                                                                                                                                                                                                                                                                                                                                                                                                                                                                                                                                                                                                                                                                                                                                                                                                                                                                                                                                                                                                                                                                                                                                                                                                                                                                                                                                                                                                                                                                                                                                                                                                                                                                                                                                                                                                 |



|                  |        |                                   |           |        |        |        |          |          |                                                                                                                                                                                                                                                                                                                                                                                                                                                                                                                                                                                                                                                                                                                                                           |
|------------------|--------|-----------------------------------|-----------|--------|--------|--------|----------|----------|-----------------------------------------------------------------------------------------------------------------------------------------------------------------------------------------------------------------------------------------------------------------------------------------------------------------------------------------------------------------------------------------------------------------------------------------------------------------------------------------------------------------------------------------------------------------------------------------------------------------------------------------------------------------------------------------------------------------------------------------------------------|
| TNFSF11          |        | cytokine                          |           | 1,249  | 1,317  | 0,008  | 2,65E-12 | 1,20E-10 | ACP5,AHR,AURKA,BCL2A1,BST1,C3AR1,CA2,CAPN2,CAV1,CCL5,CCND1,CCND3,CD14,CD40,CD44,CD83,CDK14,CDKN1B,CSF1R,CTSK,DAB2,DMPK,DUSP1,ECT2,EHD1,ESR1,F3,FAS,FGR,FHL2,FOS,FOSL1,FOXO1,FPR1,GADD45B,GCH1,GCLC,GLRX,GRB10,GRN,HCK,HCLS1,ICAM1,IFRD1,IL13,IL13RA1,IL15,IL15RA,IRF8,ITGAL,ITGAM,ITGAV,ITGB3,LAT,MAFB,MARCKSL1,MMP1,MMP9,NAB2,NFIL3,NFKB1,NOS2,NR1H3,PHLDA3,PLD1,POR,PTPRE,RALGDS,RCAN1,RHOB,RRAS,SDC1,SENP2,SERPINB9,SLC7A7,SOD2,SPP1,STAT1,STMN1,TLR2,TLR4,TNFRSF11B,TNFRSF1B,TSPAN13,TTK,VCAM1,VRK1                                                                                                                                                                                                                                                   |
| LEP              | -0,067 | growth factor                     |           | -0,051 | -0,011 | 0,004  | 3,09E-12 | 1,38E-10 | ABCC3,ACACA,ACADL,ACADM,ACADVL,ACAT1,ACO1,ACOX1,ACSL5,ALDOB,APOA1,APOA4,APOH,APOM,AQP3,ASL,ASS1,BAX,BCL2A1,BID,CASP3,CASP6,CAV1,CCL5,CCNA2,CCND1,CD14,CD36,CD40,CD63,CDKN1B,CEL,CFD,COL1A1,COL3A1,COL4A1,CSHL1,CTSV,CXCL10,CYB5A,CYBA,CYBB,CYP17A1,CYP27B1,CYP2C8,CYP4A11,DGAT1,ECH1,EHHADH,ELOVL6,EPHX2,ESR1,ETFDH,F3,FAAH,FAS,FDX1,FMO5,FOS,FTO,G6PC,GADD45A,GCLC,GNAS,GOT2,GSTA3,HGD,HSPA5,ICAM1,IDH1,IL13,IL1R1,ITGAM,JUND,LEPR,LIPA,MLX,MLXIPL,MMP1,MMP2,MMP7,MSMO1,NAMPT,NCF2,NOS2,NPPA,NPY1R,OPLAH,PCK1,PCNA,PECAM1,PEMT,PLIN2,PNPLA2,PPARA,PPARGC1A,PRF1,RAC1,RORC,SC5D,SCD,SCP2,SELP,SLC13A2,SLC25A5,SLC27A5,SLC2A2,SMPD1,SOD1,SOD2,SPARC,SPP1,SST,STAT3,STEAP4,TERT,TG,TIMP1,TMED9,TNFRSF11B,TNFSF10,TP53,TRPV1,TSPO,UCP2,VCAM1,VEGFA,VIM,ZFP36 |
| IRF8             | 1,414  | transcription regulator           |           | 1,933  | 1,963  | 0,005  | 4,00E-12 | 1,78E-10 | ATF3,B2M,BANK1,BAX,BCL6,CASP3,CCL5,CCR2,CCR7,CD14,CD37,CD40,CD74,CD83,CD86,CEBPE,CFB,CSF1R,CTSS,CYBB,DAB2,DX58,FANCF,FAS,FOS,GBP1,HOXB1,ICAM1,ID3,IDO1,IFI44L,IFI6,IFIT2,IFIT3,IL15,IL18,IRF8,ISG15,ITGAM,JAK1,LSP1,MAF,MAFB,MAPK4,MMP9,MS4A1,NOS2,OAS1,SOCS7,STAT1,TERT,TLR3,TLR4,TP53,TRIM21,TYROBP                                                                                                                                                                                                                                                                                                                                                                                                                                                     |
| TLR4             | 0,334  | transmembrane receptor            | Activated | 5,315  | 5,379  | 0,007  | 4,16E-12 | 1,84E-10 | ADM,APOBEC3B,ATF3,BAX,BPI,C3,CASP8,CAST,CCL20,CCL5,CC18,CCND2,CCR5,CCR7,CD14,CD163,CD200,CD38,CD40,CD44,CD86,CERS2,CFB,CISH,CTSK,CXCL10,CXCL6,CYP27B1,DAB2,DDIT3,EGF,F3,FAS,FCGR2B,FGL2,GADD45G,GBP2,GJA1,GRK2,HDAC1,HHEX,HLA-DQA1,HPSE,HSPA5,HTRA1,ICAM1,IFI16,IFIT2,IFIT3,IFNA10,IL13,IL15,IL15RA,IL18,IL2RB,IRF1,IRF2,IRF7,IRF8,ISG15,ISG20,ITGAM,LCN2,LHB,MET,METTL1,MIF,MMP1,MMP9,MX1,MYD88,NFKB1,NMI,NO2,NOS2,NR1H3,NR4A1,NR4A3,NMAF,PLEK,PLK2,PTGES,RAC1,RSAD2,RXRA,SELP,SGPL1,SIGIRR,SIRT3,SLA,SLCO3A1,SMPD1,SMPDL3A,SOD2,SPP1,SPTLC2,ST3GAL1,STAT1,STAT3,TCF4,TLR2,TLR3,TLR4,TNFSF10,TPM1,TREM2,TRIM21,TRIM38,TSC22D1,TSPN1,IGCC,VCAM1,XRP1                                                                                                      |
| prostaglandin E2 |        | chemical - endogenous mammalian   |           | 0,750  | 0,780  | 0,004  | 4,34E-12 | 1,91E-10 | ABCG1,ADAMTS1,AHR,ANXA2,AQP3,ARC,ATF3,BAX,BIRC3,CASP1,CASP3,CASP4,CASP6,CCL20,CCL5,CCL8,CCNB1,CCND1,CCR5,CCR7,CD14,CD40,CD44,CD55,CD69,CD83,CD86,CNNM2,COL1A1,CS7,CXCL1,CXCL10,CXCL12,CXCR4,CYTIP,DCN,DGAT1,DUSP1,DYNLL1,ESRRA,F2RL1,FAS,FN1,FOS,FOSB,FOSL1,FOXO1,GJA1,HIFI1A,HSD3B2,ICAM1,ID1,IDO1,IGFBP4,IGFBP7,IL15RA,IL1R1,IL2RG,IL7R,IRF1,ITGAM,MAFB,MMP1,MMP2,MMP9,MRC1,MX1,NEDD9,NFIL3,NOS2,NR1H3,NR4A1,NRP1,PKLR,PLA2G4A,PLK2,PTGES,PTGS1,RIN1,RORC,S100A8,SELL,SOCS2,SPP1,ST3GAL1,ST3GAL4,TCF4,TGFB3,TJP1,TNFAIP6,TNFRSF11B,TP53,TRAP1,UCP2,VEGFA,VFGFC,VIM,XRCC5                                                                                                                                                                                |
| HNF1B            | 0,329  | transcription regulator           | Inhibited | -2,631 | -2,626 | 0,001  | 4,39E-12 | 1,92E-10 | ACADVL,ACTN1,AFP,ALB,ALDOB,ANXA4,BHLHE40,CA2,CD44,CD99,CDK1,CLDN1,COL5A1,COL5A2,CXCL1,DEFB1,DUSP1,EXT1,FN1,FZD2,GSTA1,HNF1A,HNF4A,ID1,ID3,IHH,ITGA3,ITGB6,LAMB1,LUM,MAFB,MET,MMP2,MMP7,MPZL2,NID2,PDZK1IP1,PLEK2,PMP22,PSPIP2,PTPRM,S100A2,S100A4,S100A6,SGK2,SLC29A1,SLC2A2,SPARC,TACSTD2,ZEB2                                                                                                                                                                                                                                                                                                                                                                                                                                                           |
| RARA             |        | ligand-dependent nuclear receptor |           | 0,405  | 0,405  | -0,000 | 4,69E-12 | 2,05E-10 | AASS,ABCC2,ACACA,ACACB,ADAM10,ADAM17,AOX5,APOA1,APOC3,APOM,ARNT2,CALB1,CCNA2,CCND1,CD14,CD24,CD38,CD44,CD53,CD84,CD9,CD93,CDK1,CDKN1B,CDKN3,CEBPE,CENPM,CENPU,CLMN,CSHL1,CTSS,DHRS3,DUSP1,ELL2,ENAH,F12,FOLR2,FOS,FUT4,GDF2,GHR,GJB4,HCP5,HLA-B,HLA-C,HLA-G,HLA-J,HNF1B,HOXA1,HOXA10,HOXB1,HOXB7,IFI44,IFI44L,IGFBP6,IL13,IL1R1,IL6R,IRF1,LAMB1,LGALS1,LGALS3BP,ITF,LY6G6D,LYPD1,MD2L1,MAFB,MAML1,MAOB,MAP3K10,METTL7A,MGP,NEDD9,NRP1,OAS1,OXT,PBK,PCK1,PTTG1,RARG,RARRES1,RBP1,RORC,RSAD2,RTP4,SAMD9,SAMHD1,SEC31A,SELL,SHANK2,SIPA1L1,SLC25A36,SLC2A2,SMC4,SMPD1,SP110,SPP1,STAT1,STRA6,TAPBP,TERTG,TMSR15A,TNFRSF11B,IRA7,IRI3,WNT8B,XRP1                                                                                                              |

|                |        |                         |           |        |        |       |          |          |                                                                                                                                                                                                                                                                                                                                                                                                                                                                                                                                                                                                                                                                                              |
|----------------|--------|-------------------------|-----------|--------|--------|-------|----------|----------|----------------------------------------------------------------------------------------------------------------------------------------------------------------------------------------------------------------------------------------------------------------------------------------------------------------------------------------------------------------------------------------------------------------------------------------------------------------------------------------------------------------------------------------------------------------------------------------------------------------------------------------------------------------------------------------------|
| TP63           |        | transcription regulator |           | -0,183 | -0,146 | 0,004 | 4,75E-12 | 2,06E-10 | ADA,ADA2,ADAMTS1,ADM,AGR2,AHR,ALDH1A3,ANOS1,ARAF,ATG4A,AXL,BAX,BHLHE40,BMP7,BST2,CA4,CASP3,CAST,CCNA2,CCNB1,CCND1,CCND2,CCND3,CCNG1,CDK1,CDK18,CDKN1B,CDKN1C,CLDN3,COL4A1,COL5A1,CPT2,CSTA,CTSD,CXCR4,CYP2A6 (includes others),DDB2,DICER1,DNMT1,DOK1,EFNA4,ENG,F3,FAS,FBN1,FGFR3,FN1,FOS,FOSL1,FUBP1,GADD45A,GCNT3,HAGH,HSPA8,ID1,ID3,IGFBP6,IGFBP7,IHH,INSR,ITGA2,ITGA3,ITGA7,ITGB8,KHK,KRT10,KRT7,LYN,MAD2L1,MAFF,MAP2K3,MAP4K4,MAPK8,MPZL2,MYB,PCNA,PERP,PIK3R3,PKLR,PKP2,POSTN,PPARA,PRKAG2,PRKCZ,PRNP,PRPF4,PTEN,PTPN12,RAC2,RIN1,RPA1,S100A2,S100A4,S100A8,SERPINF1,SFN,SH2B3,SMAD2,SSPN,TERT,TGFBR2,THY1,TMBIM6,TNC,TNFAIP8,TNFSF10,TP53,TPM1,ULK1,UPK2,VDR,VEGFA,VIM,WNT1,XPC,ZFP37 |
| RAF1           | -0,147 | kinase                  |           | -0,879 | -0,810 | 0,009 | 6,22E-12 | 2,63E-10 | ACOT7,AKAP12,ANXA1,ATP6V1B1,BCL6,CA2,CCL19,CCND1,CD37,CD44,CD74,CDKN1B,CHN1,CLDN1,CSTA,DHRS3,EMP3,ESR1,FAS,FOS,GRN,HIF1A,HMGB3,HPCAL1,HSD11B2,ID3,IGBP1,IL1R1,ITGA2,ITGAM,ITGB3,LHB,LPGAT1,MAOB,MCF2L,MET,MMP1,MMP9,MT1F,NFKB1,NGF,NPPA,OSMR,PC,PCK1,PLD1,PNP,PPP1R10,PRORP,PRSS3,RAC1,RND3,RRM2,SDC1,SELENBP1,SH2D1A,SLC16A7,SLC26A2,SMAGP,SNRPD1,SPRY2,ST3GAL4,TBP,TERT,TFPI2,TIAM1,TIMP1,TNNI1,TSC22D1,TSPOAP1,TUBB2A,TUBG1,TXNIP,VASH1,VEGFA                                                                                                                                                                                                                                             |
| AKT1           | 0,023  | kinase                  |           | 1,697  | 1,736  | 0,005 | 7,11E-12 | 2,98E-10 | ANKH,APOC3,ASS1,ATP6V1E1,BAX,BCL2A1,BIRC3,CASP3,CCL5,CCND1,CCND2,CCND3,CD40,CD69,CD74,CD86,CDKN1B,CISH,CLU,COL4A1,CRYZ,CTSV,CXCL10,CXCL6,CXCR4,DHCR7,EBP,ENO1,ESR1,FAS,FN1,FOS,FOSB,FOXO1,FSTL1,FXD5,G6PC,GATM,GCLC,GCLM,GOSR2,GOT2,GSR,GSS,HIF1A,HIPK3,HMGB2,HNRNPJ,UND,KLF15,LAMB1,LCN2,LIPA,ME1,MMP2,MMP9,MMUT,MSMO1,MYB,NDC80,NFE2L2,NFKB1,NOS2,NOX4,NPPA,PCK1,PCOLCE,PDGFRA,PKM,PLA2G4A,PLG,PPARA,PPARGC1A,PTGS1,RAB11A,RHOB,SCD,SERPINF1,SLC3A2,SPP1,STUB1,TGFBR3,THBS2,TIMP1,TNFSF10,TP53,TPD52L1,UBE2C,VCAM,VEGFA,VIM,ZWINT                                                                                                                                                          |
| CSF1           |        | cytokine                | Activated | 2,111  | 2,170  | 0,007 | 8,04E-12 | 3,33E-10 | ACP5,ADGRE5,APOE,BAX,CCL5,CCNB1,CCND1,CCND2,CCND3,CCR5,CD163,CDKN1B,CSF1R,CTSK,CXCL6,CYBB,CYP17A1,DHCR7,DUSP1,DUSP9,EBP,ENO1,F2RL1,FAS,FCER1G,FCGR3A/FCGR3B,FHL2,FN1,FOLR2,FOS,GLS,GOT2,GPT,HSP90B1,HSPA5,IDI1,IFNGR1,IL10RA,IL18,IRF7,IRF8,ITGAM,ITGAV,ITGB3,LBR,MAFB,MMP9,MRC1,MSMO1,NCF2,NSDHL,PCNA,PFKFB3,PFKL,PKM,PMVK,PTPRC,RHOA,SC5D,SFRP1,SIGLEC1,SLC16A3,SLC1A5,SLC29A1,STAB1,STAT1,TLR1,TLR2,TLR5,TNFRSF1B,TP53,TP1,VCAM1,VEGFA,XBP1                                                                                                                                                                                                                                               |
| IFN alpha/beta |        | group                   | Activated | 5,798  | 5,844  | 0,007 | 8,21E-12 | 3,39E-10 | ARHGEF10,AXL,BAX,BID,CCL5,CCR2,CCR7,CD40,CD69,CD83,CD86,CLEC10A,CXCL10,CXCL14,FGL2,HLA-A,IDO1,IFI16,IFIT2,IFIT3,IL15,IL15RA,IL7,IRF1,IRF7,IRF8,MRC1,NOS2,RSAD2,SERPINB9,SLPI,STAT1,TLR1,TLR2,TLR3,TLR5,TLR7,TNFSF10,TRIM21                                                                                                                                                                                                                                                                                                                                                                                                                                                                   |
| IgE            |        | complex                 | Activated | 4,136  | 4,207  | 0,007 | 1,11E-11 | 4,53E-10 | ABAT,ACTN1,ALOX5,ANXA1,AQP3,BAIAP2,BCL2A1,BCL6,C3,CAMK2G,CAPN2,CARHSP1,CAV1,CCL5,CCND2,CCND3,CCR5,CD40,CD53,CD74,CD86,CHST8,CISH,CLEC7A,COL18A1,CTSK,CXADR,DUSP3,EIF4G2,ELMO1,FAS,FCER1A,FCER1G,FCGR2B,FHL2,FYN,GADD45B,HIP1R,HLA-DMA,HSPA9,ICAM1,IL13,IL15,IL33,IL7R,ITGAV,ITK,KLC1,KRAS,LAMA5,LCP2,MALT1,MARCKSL1,MCF2L,MDFIC,MGST2,MIF,MMD,MTOR,NAPA,NCF4,NFKB1,NFKBIE,NPHS2,NRP1,PEA15,PEBP1,PECAM1,PFN1,PIK3CB,PIK3IP1,PILRA,PLA2G12A,PRKCA,PTPN6,PTPRF,PXMP2,RALGDS,RASGRP1,RSAD2,SCD,SDC3,SERPINB1,SNRPD1,SPP1,TCIRG1,TLR2,TLR7,TNC,TNFRSF11B,TNFRSF1B,TNFSF10,TRAF5,TUBB6,UGCG,VCAM1,VDR,VEGFC,VIM,WNT10B                                                                            |
| CHUK           | -0,292 | kinase                  | Activated | 3,497  | 3,560  | 0,008 | 1,45E-11 | 5,84E-10 | ACKR3,AEBP1,ARL6IP5,ATF3,C3,CASP4,CCL19,CCL21,CCL5,CCNB1,CCND1,CDKN1B,CHUK,CLU,COL18A1,CTSB,CTSF,CTSZ,CXCL10,CXCL12,CXCL6,CYBA,DCN,DNMT1,EGF,ENAH,ENAPP2,F3,FAS,FOS,GADD45B,GBP2,GCH1,GM2A,GRN,HLA-A,ICAM1,IFI16,IFI35,IFIT2,IGFBP6,IL13,ISG15,ITGB3,LCN2,MAT2A,MGP,MMP2,MMP9,NAGLU,NGF,NOCT,OVOL1,PCNA,PLA2G4A,PLSCR1,RB1,RBP1,RCAN1,SERPINE2,SFRP1,SGK1,SNX10,SPP1,TLR3,TNFAIP2,TNFRSF11B,TNFRSF1B,TP53,VCAM1,VEGFA,VEGFC                                                                                                                                                                                                                                                                  |

|        |        |                                   |           |        |        |        |          |          |                                                                                                                                                                                                                                                                                                                                                                                                                                                                                                                                                                                                                                                                                                                                                                                                                                         |
|--------|--------|-----------------------------------|-----------|--------|--------|--------|----------|----------|-----------------------------------------------------------------------------------------------------------------------------------------------------------------------------------------------------------------------------------------------------------------------------------------------------------------------------------------------------------------------------------------------------------------------------------------------------------------------------------------------------------------------------------------------------------------------------------------------------------------------------------------------------------------------------------------------------------------------------------------------------------------------------------------------------------------------------------------|
| SIRT1  | -0,165 | transcription regulator           | Inhibited | -5,156 | -5,194 | -0,004 | 1,53E-11 | 6,13E-10 | ABCC2,ABCG1,ACADM,ACTB,ADAR,AFP,ANXA4,ARNT2,BAX,BCLAF1,BIRC3,BNIP3,CAT,CAV1,CCL5,CCNB2,CCND1,CCND2,CCND3,CD36,CD74,CD83,CDKN1B,CDKN2C,CORO1A,CYP2B6,DDX58,DDX60,ERMP1,ESR1,EVPL,FAS,FCMR,FGF7,FGFR3,FN1,FOXO1,G6PC,GABARAPL1,GADD45A,GFPT1,GSTA3,HCK,HIF1A,HLA-A,HLA-DQA1,HLA-DQB1,ICAM1,ID1,IFI44,IFIT3,IGHM,IL13,IL2RG,IRF7,JCHAIN,KDM5B,KIF13B,LAMB1,LAPTM5,LCK,LGALS3BP,MAOA,MAPT,MEF2C,MGAT2,MMP1,MMP2,MMP9,MYL6,NAT1,NEDD4L,NFKBIE,NKG7,NTRK2,OAS1,OAS2,PARP1,PARP12,PC,PCK1,PCK2,PDGFRA,PKD4,PER1,PHB,PLAGL2,PLEKHA6,PNPLA3,PPARGC1A,PRKCI,PSMB9,RAC1,ROCK1,RSAD2,RTP4,SHANK2,SIRT3,SLC29A1,SLC43A3,SNRNP70,SOD2,SP110,SSBP3,STAT1,STAT3,TACSTD2,TAP1,TERT,TIMP2,TP53,UBE2C,VCAM1,VEGFA,VIM,XPC                                                                                                                                  |
| PARP9  |        | enzyme                            | Activated | 3,326  | 3,361  | 0,009  | 1,54E-11 | 6,16E-10 | ACTB,ALDH1A3,BAX,BCKDHB,CCL5,CCNB1,CCNB2,CCND1,CCNG1,CDH3,CDKN1B,COL18A1,CTSD,CTSF,CYP1B1,CYP3A4,DDDB2,DIT3,DDX58,DUSP3,ENPP2,ESR1,FAS,FIIT,FHL2,FKBP5,FOXO1,GADD45A,GADD45B,HBB,HSD11B2,IFI27,IFI6,IFIT2,IFIT3,IFITM1,IRF7,JAK1,LPIN1,MAD2L1,MX1,NEDD9,NFE2L2,PCBP2,PCNA,PERP,PLSCR1,PLTP,PTEN,ROBO1,S100A2,SERPINE2,SFN,STAT1,TAP1,TBP,TERT,TNFAIP2,TP53,UBE2I,VCAN,VEGFA,VIM,XPC                                                                                                                                                                                                                                                                                                                                                                                                                                                     |
| BRCA1  |        | transcription regulator           | Activated | 2,115  | 2,137  | 0,003  | 1,77E-11 | 7,04E-10 | ACTB,ALDH1A3,BAX,BCKDHB,CCL5,CCNB1,CCNB2,CCND1,CCNG1,CDH3,CDKN1B,COL18A1,CTSD,CTSF,CYP1B1,CYP3A4,DDDB2,DIT3,DDX58,DUSP3,ENPP2,ESR1,FAS,FIIT,FHL2,FKBP5,FOXO1,GADD45A,GADD45B,HBB,HSD11B2,IFI27,IFI6,IFIT2,IFIT3,IFITM1,IRF7,JAK1,LPIN1,MAD2L1,MX1,NEDD9,NFE2L2,PCBP2,PCNA,PERP,PLSCR1,PLTP,PTEN,ROBO1,S100A2,SERPINE2,SFN,STAT1,TAP1,TBP,TERT,TNFAIP2,TP53,UBE2I,VCAN,VEGFA,VIM,XPC                                                                                                                                                                                                                                                                                                                                                                                                                                                     |
| ESR2   |        | ligand-dependent nuclear receptor |           | -0,382 | -0,371 | 0,002  | 2,05E-11 | 7,98E-10 | ADAMTS1,AKAP1,AKAP12,ANXA4,APOE,AQP3,ARNT2,ATF3,AVP,BAG1,BID,BIN1,C3,CA2,CAPN2,CAV1,CCN3,CCNA2,CCND1,CD93,CDKN1B,CDKN1C,CGA,CHST15,CHUK,CLDN1,CLIC5,COL16A1,COL1A1,COL1A2,CRYZ,CTSD,CXCL12,CYP17A1,CYP2A6 (includes others),DAB2,DDAH1,DDDB2,DHCR7,DMTN,ENPP2,ESR1,F2RL1,FHL1,FN1,FOS,FOXO1,FSCN1,FZD2,GADD45B,GALNT7,GCLC,GJB1,GLB1,GLRX,GM2A,GPSM2,GRPR,GSTP1,HPGD,IGFBP4,IMPDH2,ITGA2,JAK1,KCNK15,KRT19,LAPTM5,LHB,MAOA,MAP2K3,ME2,MGA3,MME,MMP1,MMP2,MPC1,MUC1,NDRG1,NEDD9,NFKB1,NID2,NIPSNAP1,NOS2,OXT,PCBD1,PCYOX1,PKD4,PERP,PGRMC2,PIBF1,PLIN2,PPP1R12A,PPP1R3C,PRKCH,PSAT1,PTEN,PTH1R,PYGL,RAI2,RAPGEF6,RASSF2,ROCK1,RORC,S100A9,SEMA3B,SFXN3,SGK1,SHC1,SLC2A4RG,SLC9A3R1,SMAD2,SMAD7,SNN,SOC2,SOX4,SPP1,ST8SIA4,SUCLA2,TAC1,TEAD4,TERT,TESK1,TGFBR2,THBS4,TIMP1,TIMP2,TNFRSF11B,TPM1,TSC22D1,TSPAN13,TSPPO,UBL3,VEGFA,VIM,VIME |
| ADIPOQ | -0,154 | other                             |           | -0,275 | -0,270 | 0,001  | 2,39E-11 | 9,22E-10 | ACACA,ACACB,ACOX1,ACSL1,ACSL5,ACSM5,ADIPOR1,CASP6,CCCL20,CCL5,CCND1,CD163,CD36,CDKN1B,CGA,CLEC10A,COL3A1,CXCL1,CXCL10,CXCL11,CXCL9,CYBA,CYBB,DGAT1,DUSP1,F3,FN1,FOS,G6PC,GPD1,HMGCS2,ICAM1,IL4R,LEPR,MMP1,MMP2,NCF2,NCF4,NOS2,NOX4,NPPA,NR1H3,PCK1,PCNA,PDCD4,PPARA,PPARGC1A,PRDX3,PTEN,ROCK1,SCD,SHC1,SLC27A2,SLC27A5,SOAT1,SOD2,STAT3,TIMP1,TP53,UCP2,VCAM1,VEGFC                                                                                                                                                                                                                                                                                                                                                                                                                                                                     |
| CLDN7  | 0,302  | other                             |           | -0,130 | -0,129 | 0,000  | 2,77E-11 | 1,05E-09 | ALDH3A1,ANXA3,APOE,ARHGDI1,ASAP1,C1S,C3,CCL20,CKAP4,DENND5A,F3,FOSL1,FZD2,GLS,GRINA,HLA-B,IFI44,IFI6,IGFBP7,ITPR3,LIMA1,MAGED1,MMP2,MMP9,MRPL40,MRPS15,MT1X,MUC1,MUC13,MX1,NETO2,NNMT,PHGDH,PLAAT3,PRKZ,PRNP,PRSS8,PSMG2,RNASET2,RPP40,RRAS2,SERPINB1,SLC35B1,SLCO2A1,TIMP2,TJP1,TPK1,UBE2L6,WIP1,ZCCHC14                                                                                                                                                                                                                                                                                                                                                                                                                                                                                                                               |
| NR1H3  | -0,242 | ligand-dependent nuclear receptor |           | 0,563  | 0,571  | 0,001  | 3,56E-11 | 1,33E-09 | ABCG1,ACACA,ACOX1,ADRB2,ANGPTL3,APOA1,APOC3,APOE,APOM,ARG2,ARL4C,ATF3,AURKA,C1QA,CAT,CCL5,CCNA2,CCNB1,CCNB2,CCR2,CCR5,CCR7,CD38,CD40,CD47,CD55,CDC25B,CDK1,CDKN1B,CFB,CX3CR1,CXCL10,CYTIP,DDX60,DHRS9,FBP1,FGL2,FR1,G6PC,GPT,GPX3,GSTP1,HK1,IFIT2,IRF7,ITGAL,ITGB3,KIF20A,LAIR1,LCP2,LSP1,LY86,LYZ,MELK,MIF,MLXIPL,MMP9,MYLIP,NOS2,NROB2,NR1H3,PKLR,PLTP,PPARGC1A,PRC1,RB1,SCD,TAP1,THRB,TLR1,TP53,UBE2C,VCAN,VEGFA,VEGFC                                                                                                                                                                                                                                                                                                                                                                                                               |
| IgG    |        | complex                           |           | -0,499 | -0,536 | -0,005 | 3,64E-11 | 1,35E-09 | ADGRG1,ADM,AFM,AOC1,APOE,ARSB,ATP6V0D1,B2M,C3,CALR,CCL5,CCND2,CCR2,CD40,CD86,CD9,COL3A1,CXCL10,CYP27A1,DDIT3,DHCR7,DUSP1,FCGR2B,FN1,FOLR2,FOSB,GNAS,GUK1,HLA-E,HSPA5,HTR2B,IFITM1,IL13,INPP5D,ISG15,ITGAM,ITGB8,JUND,KRT10,LCN2,LGALS1,MAF,MAFB,MMP9,MS4A1,NGF,PEA15,PLS3,PPP1R15A,PRSS8,PTPN6,RND3,S1PR1,SERPINF1,ST14,STAB1,TACSTD2,TAPBP,TLR4,TLR7,TNC,TNFRSF17,TOB1,TUBB2A,UGCG,VCAM1,VEGFA,ZFP36                                                                                                                                                                                                                                                                                                                                                                                                                                   |

|        |        |                                   |           |        |        |        |          |          |                                                                                                                                                                                                                                                                                                                                                                                                                                                                                                                                                                                                                                              |
|--------|--------|-----------------------------------|-----------|--------|--------|--------|----------|----------|----------------------------------------------------------------------------------------------------------------------------------------------------------------------------------------------------------------------------------------------------------------------------------------------------------------------------------------------------------------------------------------------------------------------------------------------------------------------------------------------------------------------------------------------------------------------------------------------------------------------------------------------|
| ANGPT2 |        | growth factor                     | Activated | 2,653  | 2,707  | 0,007  | 3,64E-11 | 1,35E-09 | ABCC1,ADA,ARL4C,BAG1,C1R,CALR,CASP3,CAT,CCL5,CFB,COL1A1,COL1A2,COL3A1,COMT,CRYBB3,CYBA,CYBB,DDIT3,EPHX2,EXT2,FAS,FGF7,FKBP4,FN1,HIF1A,HSPA5,ICAM1,LARP4,LEPR,LYN,MAPK10,MAPK12,MIF,MMP1,MMP2,MMP7,MMP9,NME1,NOX4,NPHS1,NPPA,P4HB,PDCD4,PDIA3,PDIA5,PDIA6,PLG,POSTN,PPARA,PTGES,RCAN1,RFC2,RHOB,RPA2,RPA3,SERPING1,SMYD5,SODS7,SOD1,SOD2,ST13,TCN2,TGFBR2,THBS2,TLR3,TP53,TXNIP,VCAM1,VIM                                                                                                                                                                                                                                                     |
| INS    | -0,118 | other                             |           | 0,985  | 0,995  | 0,001  | 4,15E-11 | 1,53E-09 | ACACA,ACADL,ACADM,ACADVL,ADAM10,ADIPOR1,ADM,ALDH3A2,APOA1,AQP3,AVP,CAT,CCND1,CD36,CIDEA,CSHL1,CUL5,CYP17A1,DDIT3,DUSP1,ERBB3,F3,FAS,FOS,FOSB,FOSL1,FOXO1,G6PC,GABARAPL1,GRB10,HIF1A,HSPA5,ICAM1,IGFBP4,IGKC,INSR,JUN,NDUFV1,NOX4,NR1H3,NR4A1,OXT,PCK1,PLIN2,PLK2,PPARGC1A,PTGS1,SCD,SELP,SLC2A2,SMPD1,SOD1,TP53,TRIB3,UGCG,VEGFA,VLDLR,XBP1                                                                                                                                                                                                                                                                                                  |
| CD44   | 0,962  | other                             | Activated | 4,431  | 4,482  | 0,007  | 4,34E-11 | 1,59E-09 | ABCA5,ABCG2,ACKR3,ACTB,ADRB2,ANXA11,BIRC2,BIRC3,CALR,CCL19,CCL5,CCND1,CCND2,CCNG1,CCR2,CCR5,CCR7,CD36,CD44,CD63,CD69,CD8A,CDH5,CDKN1B,CDX2,CIDEA,CLEC7A,CLU,COL1A1,COL1A2,COL3A1,COL5A2,COMMD3,CTSK,CX3CR1,CXADR,CXCL6,DDIT3,DNMT1,FAS,FKBP4,FKBP5,FN1,GADD45A,IFITM2,ITGA3,ITGAV,LAMB1,LAMC1,LGALS1,MAPK8,MET,MMP2,MMP7,MMP9,MYO1B,NECAP2,NOX4,PDCD4,PECAM1,SELL,SMAD1,SPP1,TCIRG1,THBS2,THY1,TIAM1,TLR8,VCAM1,VIM,WBP2                                                                                                                                                                                                                     |
| CG     |        | complex                           |           | 1,585  | 1,648  | 0,006  | 4,44E-11 | 1,63E-09 | ACSL1,ACTB,ADAMTS1,ADM,B2M,BARD1,BAX,BHLHE40,BHMT,CND2,CCND3,CD93,CDKN1B,CLU,CTSV,CXCL10,CXCR4,CYP17A1,DDX25,DHCR7,DTL,DUSP1,EFEMP1,EFNB2,ELK3,ENPP2,ESM1,F2RL1,FAS,FGL2,FHL1,FOS,FYN,FZD4,G0S2,G6PC,GASK1B,GJA1,GM2A,GTF2E1,HIF1A,HLA-A,HLA-DQA1,HPGD,HPSE,HSD11B2,HSD3B2,ICAM1,IFIT3,IGFBP4,IL33,IL4R,INHA,ITGAV,ITGB3,KHK,KLHDC4,LEPR,LGALS3BP,MAF,MCAM,MMP1,MMP2,MMP9,NOS2,NPR3,NR1H2,NR2F6,NR4A1,NRP1,NUC2,OXTR,PAPPA,PCNA,PECAM1,PFKFB3,PLXND1,PPARA,PRLR,PTGS1,RASSF2,RECQL,RORA,S100A10,S100A6,SACS,SDC1,SLC4A4,SMAD2,SMARCA1,SMARCA5,SPP1,SPRY2,SRD5A2,ST8SIA4,TAC1,TFPI2,TGFBR3,TIMP1,TM4SF1,TNFAIP6,TP53,TSPAN13,VCAN,VEGFA,VEGFC |
| E2F4   | -0,023 | transcription regulator           |           | -1,768 | -1,762 | 0,003  | 4,53E-11 | 1,65E-09 | ALG5,ANAPC15,BARD1,BNIP3,CALM1 (includes others),CASP4,CASP6,CCNA2,CCND1,CDK1,CDKN2C,CRADD,DHPS,DROSHA,ECT2,EFHC1,EIF2B2,EXOSC8,FAS,FGF7,FOXN1,GINS1,HMGB3,HSP90B1,ID3,IER5,KIF22,LPAR1,MAD2L1,MC3M3,MC5M,CM6,MSH2,MT1G,MTHFD1,MYB,NASP,NCL,NDC80,NFE2L1,OIP5,PCNA,PCSK1N,PGRCM1,PLSCR1,PPARGC1A,PPP1R8,PRC1,PSAT1,PTTG1,RB1,RFC2,RPA3,RRM1,RRM2,SFRP1,SLC3A2,SMARCA5,SMC4,STAM,STMN1,TEAD4,TERT,TP53,TP53BP2,TPX2,TTK,UBE2C,XPC,ZNF267,ZNF91                                                                                                                                                                                                |
| THRB   | -0,215 | ligand-dependent nuclear receptor |           | -0,926 | -0,916 | 0,002  | 5,04E-11 | 1,83E-09 | ACACA,ACOX1,ANGPTL3,APOA1,APOC3,APOM,ATP1A3,CASP1,CANB1,CCND1,CCND2,CCND3,CDKN1B,CFD,CGA,CSHL1,CSNK1A1,CTSD,CXCL10,CXCR4,CYP27B1,DCN,DDC,DIO1,EGF,EHHADH,ENG,ERBB3,F12,FGFR3,FOS,FOSL1,FOXN1,FRAT1,FRZB,FSTL1,FZD4,FZD6,G6PC,GCH1,HIF1A,ID1,IGHM,IL7,KLF9,LYZ,MAPK8,ME1,MET,MLXIPL,MMP1,MMP2,MMP7,MMP9,NME1,NPPA,NR1H3,NR4A1,PCK1,PDK4,PER1,PHYH,POR,PROM1,PTTG1,SFRP1,TGFB1,THRB,TLR2,TP53,WIF1,WNT8B,YWHAE                                                                                                                                                                                                                                 |
| UCP1   |        | transporter                       | Inhibited | -4,326 | -4,313 | 0,002  | 5,67E-11 | 2,04E-09 | ACACA,AGAP1,ALDH18A1,ARHGAP33,ASNS,BCKDHA,BCKDHB,BTF3,BZW2,CAPN3,CASP3,CLCN3,CTH,CTSV,CXCL10,CYB5R1,DDIT3,DDX58,DKK3,ESRRG,FGF7,GADD45A,GARS1,GHITM,GNMT,GO1,GPX3,GSR,GSTO1,GSTZ1,IFIT2,IFIT3,LRRC8D,MTHFD1,MTHFD2,NDUFA10,NDUFS3,OAS3,PCK1,PCK2,PHGDH,PSAT1,PSD3,RAB40B,RNASEL,SDHB,SHMT1,SHMT2,SLC3A2,SMYD2,SNR1,TLR3,TLR7,TRIB3,TTLL7,TXN2,UCP2,UQCRC1,UQCRC2,USH1C                                                                                                                                                                                                                                                                       |
| mir-21 |        | microRNA                          | Inhibited | -3,516 | -3,577 | -0,007 | 5,83E-11 | 2,09E-09 | AOAH,ARF4,C1R,CASP4,CCL19,CCNA2,CCNB1,CCND1,CD180,CDH5,CLPB,CLU,COL1A1,COL3A1,CRY2,CSE1L,CXCL10,DDAH1,DLGAP5,ECT2,FAS,FGF1,FGL2,FN1,FUBP1,GBP2,HIPK3,ICAM1,IDO1,IF116,IGHM,IL18,IL6R,INPP5D,IRAK1,IRF1,ITK,LEPR,LTB,MMP2,MMP9,MSH2,MYD88,NME1,NMT2,NOS2,OAS2,OAS3,PBK,PDCD4,PECAM1,PIP4K2A,PPARA,PRC1,PTEN,RECK,RHOB,SIGLEC1,SLPI,SMAD2,SMAD7,SMARCA4,SOD2,SPRY1,SPRY2,SSR1,STAT1,STAT3,STMN1,TACC3,TAP1,TERT,TIAM1,TLR1,TLR2,TLR4,TP53,TPM1,TREM2,TRIM37,UBA7,UBE2L6,VCAM1,VRK1,YWHAZ,ZWILCH                                                                                                                                                |



|        |        |                               |           |        |        |        |          |          |                                                                                                                                                                                                                                                                                                                                                                                                                                                                                                                                                                                                                                                                                                            |
|--------|--------|-------------------------------|-----------|--------|--------|--------|----------|----------|------------------------------------------------------------------------------------------------------------------------------------------------------------------------------------------------------------------------------------------------------------------------------------------------------------------------------------------------------------------------------------------------------------------------------------------------------------------------------------------------------------------------------------------------------------------------------------------------------------------------------------------------------------------------------------------------------------|
| IL1RN  |        | cytokine                      | Inhibited | -5,934 | -5,987 | -0,008 | 5,97E-11 | 2,13E-09 | ATF3,BTN3A1,CCL20,CD44,CTSS,CXCL1,CXCL11,DDX58,GBP1,HE<br>RC6,HLA-<br>DQB1,ICAM1,IFI27,IFI44,IFI44L,IFI6,IFIH1,IFIT3,IFIT5,IGFBP4,IL32,IR<br>F1,IRF7,IRF9,ISG20,LAMP3,MMP1,MMP9,MX1,MX2,NGF,NOS2,NR0<br>B2,OAS1,OAS2,OAS3,RARRES1,RSAD2,RTP4,S100A9,SAMD9,SLC<br>15A3,SPP1,TAC1,THEMIS2,TIMP1,TNFSF10,TRIM22,UBD,VEGFA,V<br>EGFC                                                                                                                                                                                                                                                                                                                                                                           |
| TLR9   |        | transmem<br>brane<br>receptor | Activated | 4,009  | 4,077  | 0,008  | 6,00E-11 | 2,13E-09 | ARG2,ATF3,CAST,CCL5,CCNA2,CCNB1,CCND1,CCR7,CD27,CD30<br>0A,CD38,CD40,CD69,CD83,CD86,CDKN1B,CISH,CTH,CXCL10,CXC<br>L6,CXCL9,DUSP1,FAS,FCMR,GADD45B,GCH1,IDO1,IFI16,IFI35,IFI4<br>4L,IFIT2,IFIT3,IFITM1,IFNA10,IL10RA,IL18,IL33,IL36A,IRF1,IRF7,IRF<br>9,ISG15,ISG20,KDELRL3,LAIR1,LCN2,MX1,MX2,NAMPT,NOS2,NR0B<br>2,NR4A1,NSMAF,OAS2,OAS3,ORMDL2,PFKFB3,PROCR,RSAD2,S1<br>00A8,SDC1,SGPL1,SMPD1,SMPDL3A,SPRY1,SPTLC2,ST3GAL5,ST<br>AT1,TIMP1,TLR4,TLR7,TNC,TNFRSF1B,TNFSF10,TP53,UAP1,UGC<br>G,XBP1                                                                                                                                                                                                         |
| NKX2-3 |        | transcriptio<br>n regulator   |           | -1,022 | -1,021 | 0,000  | 6,43E-11 | 2,27E-09 | ACO1,ADM,ALPL,APOBEC3G,ARHGDB,ASNS,CASP1,CCNB2,CD3<br>6,CD38,CDKN3,CEP55,CXADR,DCLK1,DDX58,DDX60,F2RL1,FAR2,<br>GASK1B,GBP1,GBP2,GCA,GCH1,GHR,HCP5,HLA-B,HLA-C,HLA-<br>F,IDO1,IL7R,KRT81,LYPD1,MCTP1,MFNG,MMP7,MYD88,NETO2,NT<br>5DC2,PARP12,PHGDH,PLD1,PLSCR1,POSTN,PSAT1,PSMB8,PSM<br>B9,PTPRE,RPL23,RTP4,SAMD9,SERPINE2,SHMT2,SLC25A28,SMA<br>D7,SP110,SRPX,SRPX2,STAT1,SYT11,TAP1,TAP2,TFF3,TFPI2,TIP<br>ARP,TNFRSF10D,TRIM21,TRIM22,TRIM5,UBA7,UBE2L6,VCAM1,XA<br>F1,ZMAT3                                                                                                                                                                                                                            |
| SP110  | 0,627  | transcriptio<br>n regulator   | Inhibited | -2,979 | -2,994 | -0,002 | 6,93E-11 | 2,44E-09 | ANXA5,AQP3,ATF3,BST2,CD74,CLU,CTSB,CXCL10,CXCL11,DICER<br>1,F3,FLII,FUS,GRN,IFI27,IFI6,IFIH1,IFIT3,IFITM1,IL18,IL1R1,IL4R,IL6<br>R,IRF9,ITGAV,LY96,MAOA,MX1,MYH9,NCK1,NFIL3,OAS1,OAS3,PA<br>NX1,PERP,PLSCR1,PRKCA,PTPN12,RAC1,RPA1,RXRA,SMAD2,SM<br>ARCA4,SMARCD3,SOX4,SP3,STAT1,TGFB3,TIA1,TIMP1,TNFRSF<br>21,TRIM5,TXNIP,WWOX                                                                                                                                                                                                                                                                                                                                                                            |
| ARNT   |        | transcriptio<br>n regulator   |           | 0,030  | 0,070  | 0,008  | 7,27E-11 | 2,54E-09 | ADAM17,ADM,AHR,ALDH3A1,ALDH7A1,BHLHE40,BHLHE41,BNIP3,<br>CAV1,CCND2,CCR5,CCR7,CD81,CDCP1,CLDN1,CTSD,CXCR4,CY<br>P1B1,CYP2A6 (includes<br>others),EIF6,ENG,ENO1,ESRRG,G6PC,GSTA1,GZMH,HIF1A,HNF1A<br>,HNF4A,ID2,IGHM,INSR,ITGAV,ITGB3,KIF20A,MPP1,MYL6,NDUFS2,<br>NDUFS3,NDUFS4,PCK2,PRF1,S1PR1,SELL,TP53,TP11,UBE2C,VEG<br>FA,VIM                                                                                                                                                                                                                                                                                                                                                                          |
| MAPT   | -0,922 | other                         |           | -1,546 | -1,542 | 0,002  | 7,30E-11 | 2,54E-09 | ABCG1,ABCG2,ACAT1,ACO2,ACTB,ACTG1,ACTN1,ALB,ALDH5A1,<br>ANXA5,ARF4,ATOX1,ATP1A3,ATP5F1D,ATP6V0D1,ATP6V1E1,BAC<br>E1,BASP1,C1QBP,C1R,C1S,C3,CALML3,CAMK2A,CAMK2G,CAP1,<br>CAPN1,CAPN2,CASP3,CAST,CCDC25,CCNB1,CCND1,CDK5,CDKN<br>1B,CLTB,CORO1A,CRYM,CTSD,CYFIP2,DLG,DNAJC6,DNM1L,DYP<br>SL2,DSTN,DYNC1L1,ENO1,ERMP1,FGFR3,FOS,FUZ,FYN,GAD1,G<br>OT2,GPM6B,GSTP1,GUCY1B1,HK1,HSPA4L,HSPA5,HSPA8,KLC1,<br>MAPK8,MAPT,MTHFD1,MTOR,NAPA,NDUFS3,NDUFS4,NDUFS8,N<br>FKB1,NME1,NOS2,NTRK2,OGDH,PEA15,PEBP1,PKM,PRDX3,PRN<br>P,PVALB,QDPR,RPL23,RPS16,SEC31A,SH3GL2,SLC1A3,SOD1,ST<br>MN1,STUB1,STXBP1,SUCLG1,THY1,TLN2,TP53,TP11,TUBA1A,TU<br>BA1B,TUBB,TUBB2A,TUBB4B,TUBB6,TUFM,TXN,UCHL1,UQCRC2,<br>VAMP2,YWHAF |
| STAT5A | -0,216 | transcriptio<br>n regulator   |           | -1,906 | -1,894 | 0,002  | 7,41E-11 | 2,57E-09 | A2M,AGR2,ALDH3A1,APOE,BAX,BCL11A,BCL2A1,BCL6,BIRC3,CA<br>SP3,CASP4,CASP6,CASP8,CCND1,CCND2,CCND3,CCR5,CD24,C<br>DC7,CDKN1B,CISH,CYP1B1,CYP27B1,CYP2J2,ESR1,EZH2,FAS,FC<br>ER1G,FOS,FOSB,GADD45A,GADD45G,GASK1B,GCHFR,GCNT3,G<br>DPD3,GJB1,GZMA,GZMK,HOXB6,HSD3B2,ICAM1,ICAM2,ID1,ID2,IFI<br>TM2,IL2RB,IL6R,IL7R,IRF1,KLRB1,LCN2,LTB,LY6G6D,MAF,MMP7,M<br>UC13,NR1H3,OAS1,PLAAT4,PRF1,PRLR,PSMB8,QPCT,QPRT,RIN2<br>,RORA,RPA1,SELENBP1,SERPINA3,SH3GL2,SLC2A10,SLC34A2,S<br>LC7A7,SLC7A8,SOCS2,TACSTD2,TFF3,TGFB1,TGFB2,TM4SF1,T<br>NNC1,TNNI1,TP53,TSPAN13,TSPAN8,TXNIP,WARS1,ZFP36                                                                                                                        |
| CLOCK  | 0,011  | transcriptio<br>n regulator   |           | -0,386 | -0,392 | -0,001 | 8,74E-11 | 3,00E-09 | ACOX1,ARHGEF10,ARHGEF28,ARNT2,AVP,BHLHE40,BPHL,C1QB<br>P,CBFB,CCND1,CD86,CPD,DDIT3,DHTKD1,DNAJB9,DNAJC16,EFH<br>C1,EIF4G2,ELOVL6,ESYT1,FGF1,FKBP5,FZD6,GADD45A,GADD4<br>5B,GCC2,GIMAP4,GJA1,GLIPR1,GNPTAB,GPR3,GT2E1,HIPK3,HLA-<br>DQB1,HMGCS2,HSD17B8,ICAM1,ID1,IHH,ITM2C,KANK2,KAT5,KIF2<br>0A,LPIN1,MAP2K3,MAPK8,MGAT2,MGP,MMP7,MOXD1,MMSO1,ND<br>UFA3,NFIL3,NOCT,NR0B2,OAS3,PER1,POMGNT1,POR,PPARA,PR<br>DX3,RAP2B,RIOX2,SCD,SLC12A3,ST3GAL5,ST6GALNAC4,TBRG4,<br>TEF,TMED3,TMX1,TNFRSF21,TOR1B,TP53BP1,TPST1,TRIL,UBL3,<br>USP2,VSTM4,WNK1,WT1,ZZZ3                                                                                                                                                   |

|                            |       |                                 |           |        |        |        |          |          |                                                                                                                                                                                                                                                                                                                                                                                                                                                                                                                                                                                                                                                                                                                                                                                                                                                                                                                                                                                                                                                                                                                                                                                                                    |
|----------------------------|-------|---------------------------------|-----------|--------|--------|--------|----------|----------|--------------------------------------------------------------------------------------------------------------------------------------------------------------------------------------------------------------------------------------------------------------------------------------------------------------------------------------------------------------------------------------------------------------------------------------------------------------------------------------------------------------------------------------------------------------------------------------------------------------------------------------------------------------------------------------------------------------------------------------------------------------------------------------------------------------------------------------------------------------------------------------------------------------------------------------------------------------------------------------------------------------------------------------------------------------------------------------------------------------------------------------------------------------------------------------------------------------------|
| 15-deoxy-delta-12,14-PGJ 2 |       | chemical - endogenous mammalian | Inhibited | -2,550 | -2,575 | -0,003 | 1,22E-10 | 4,17E-09 | BAX,BIRC2,BIRC3,CASP3,CAV2,CCL5,CCNB1,CCND1,CCND2,CCNG1,CD200,CD36,COL1A1,COL1A2,CTSB,CTSD,CXCL10,CXCL11,CXCL9,CYBB,DDIT3,DDX58,DNAJB1,EHF,ESR1,FABP2,FKBP4,FN1,FOS,GADD45A,GCLC,GCLM,GSR,GSTP1,HLA-DRA,ICAM1,IRF1,ITGAM,MMP1,MMP9,MUC1,MYB,NFE2L2,NFKB1,NOS2,NOX4,P4HA1,PARP1,PDGFRA,PLA2G4A,PLAAT4,PTGES,PTGES2,RORA,SOAT1,SOD1,SPP1,STAT1,TBXAS1,TG,TMPRSS2,TP53,VCAM1,VEGFA                                                                                                                                                                                                                                                                                                                                                                                                                                                                                                                                                                                                                                                                                                                                                                                                                                    |
| CTNNB1                     | 0,011 | transcription regulator         |           | 1,042  | 1,104  | 0,007  | 1,24E-10 | 4,22E-09 | ABCC1,ABCD4,ACACA,ACAT1,ACTB,ACTR3,ADAM17,AFP,AGRN,AHR,ALDH1A3,ALDH3A2,ANXA1,AURKA,BACE1,BHLHE40,BMP7,BOLA1,BTF3,CALM1 (includes others),CAPN1,CCNA2,CCND1,CCND2,CD36,CD44,CD47,CD99,CDH11,CDKN1B,CDX2,CENPM,CFD,CIDEC,CLU,CNN2,COL1A1,COL4A1,COL4A2,CPT2,CRAT,CRIP1,CTSF,CTSZ,CXCL12,CXCL6,CYB5A,CYFIP2,CYP1B1,CYP2A6 (includes others),CYP4F12,DDIT3,DDX50,DIO1,DNAJC6,DOK1,DPEP1,EHD1,ELMO1,ENO3,ENPP2,ERBB3,EVX1,EYA2,FAS,FBRS,FCER1G,FN1,FOS,FOSL1,GAD1,GADD45B,GADD45G,GCH1,GHR,GJA1,GJB1,GLI3,GLUL,GPR137B,GRAMD4,GTPBP6,HHEX,HMG20B,HMGCS2,HNF1A,HNF4A,HOXB7,HTATIP2,HTRA1,ID1,ID2,ID3,IDO1,IFITM1,IGHM,IHH,IL13,IL1R1,IL7,IMPDH2,INHA,IRF8,ITGAL,ITGB2,JAM2,JCHAIN,KITLG,KRT7,LAMB1,LCK,LHB,LIPA,LSP1,MAN2B1,ME1,MECOM,ME, MMP1,MMP2,MMP7,MMP9,MPZL2,NAT8,NKX2-5,NOP53,NOS2,NPHS2,NR4A1,OAT,OGG1,OSBPL1A,PARD3,PCCA,PCNA,PECAM1,PFN1,PLS3,PMP22,PRDM14,PRX,PTEN,QPCT,RAB3A,RGN,S100A4,S100A8,SCD,SCRN1,SERPINA3,SERPINA5,SERPINE2,SFN,SFRP1,SGK1,SLC12A2,SLC1A5,SLC25A46,SLC26A2,SLC39A14,SLC9A3R1,SMAD7,SNRNP70,SORBS3,SOX4,SPP1,STAT3,STXBP1,SYK,TCF12,TCF4,TERT,TIA1,TIMP1,TJP1,TMSB15A,TNC,TNFRSF11B,TNFSF10,TNNC1,TP53,TRAPPC2L,TSC22D1,TSPAN8,UGCG,UPB1,VAV1,VCAM1,VCAN,VEGFA,VIM,WIF1,WT1,XAF1,ZEB |
| Alpha catenin              |       | group                           | Inhibited | -5,241 | -5,307 | -0,010 | 1,34E-10 | 4,55E-09 | ADAMTS1,BIRC3,CCN3,CDH11,CDKN1B,COL15A1,COL1A1,COL1A2,COL3A1,COL5A1,COL5A2,COL6A3,CTSB,CTSV,CXCL10,CXCL12,CXCL6,ELK3,ENG,FSTL1,ICAM2,IGFBP4,IGFBP6,IGFBP7,IL2RG,IL36A,IRF1,ITGAM,LUM,LYN,LYZ,MMP2,MMP9,PDGFRA,S100A8,S100A9,SGK1,STEAP4,THBS2,TIMP1,TNC,TNFAIP2,TNFAIP6,TSPAN8,VCAM1,VIM,WIPF1,ZEB2                                                                                                                                                                                                                                                                                                                                                                                                                                                                                                                                                                                                                                                                                                                                                                                                                                                                                                                |
| lfn gamma                  |       | complex                         | Activated | 3,516  | 3,548  | 0,005  | 1,44E-10 | 4,86E-09 | ADAR,APOBEC3G,BAG1,CASP1,CASP3,CCL5,CD86,CDKN1B,COL1A1,CSE1L,CXCL10,CXCL9,CYBB,ESR1,FAS,FN1,GBP1,HLA-DRA,ICAM1,IFI44L,IGFBP4,IL32,IL33,IRF8,LY96,MAP4K4,MMP9,MYD88,NOS2,NR4A3,PCK1,PSME1,SH2D1A,SOC3,STAT1,TACR2,TERT,TLR3,TLR4,TNFSF10,VSIG4,XAF1                                                                                                                                                                                                                                                                                                                                                                                                                                                                                                                                                                                                                                                                                                                                                                                                                                                                                                                                                                 |
| estrogen receptor          |       | group                           | Inhibited | -3,193 | -3,194 | -0,000 | 1,59E-10 | 5,34E-09 | ABCG1,ABCG2,AGO1,ANXA1,ANXA9,AXL,BAX,BMP7,C3,CALB1,CAPG,CAV1,CAV2,CCND1,CCND2,CD24,CD44,CD59,CD99,CDH11,CDH15,CDH3,CDH5,CDH9,CLDN3,COL4A1,COL4A2,COL5A1,CXCL1,CXCL12,CXCR4,CYP2B6,DICER1,DNMT1,ERBB3,F12,FGF1,FGF13,FGFR3,FN1,FOS,HOXC10,ICAM1,ICAM2,ITGA3,KRT19,KRT7,LTF,LYN,MAPK12,MAPT,MMP1,MMP9,MSN,MUC1,NEDD9,PCDH1,PLEK2,POR,PRLR,SELL,SLC9A3R1,SMAD1,SPARC,TERT,TFF3,TGFBR2,TGFBR3,TIMP1,TIMP2,TLR4,TNC,TP53,VEGFA,VEGFC,VIM,XBP1                                                                                                                                                                                                                                                                                                                                                                                                                                                                                                                                                                                                                                                                                                                                                                           |
| MYCN                       |       | transcription regulator         | Inhibited | -2,938 | -2,919 | 0,002  | 1,62E-10 | 5,45E-09 | ABCB7,ABCC1,ABCC3,ABCD4,ABCG2,ACTB,ACTG1,ARPC1B,B2M,BASP1,BAX,BID,CAV1,CCND1,CCND2,CCNH,CDH11,CDH5,CDKN1B,CHPF2,CKAP4,CLU,COL18A1,COL1A1,COL4A1,COL5A2,DKK3,ED,EIF4G2,EZH2,FAU,FBN1,FN1,HLA-A,ID2,IGFBP7,ITGA2,ITGA3,KDM5B,LGALS1,MMP2,MXI1,MYH9,MYL12A,NCL,NDRG1,NME1,NUCB1,P3H1,PDIA4,PGRMC2,PHB,PHGDH,PRKN,PSMB6,PSMB7,PTDSS1,RBBP7,RPL13A,RPL23,RPL28,RPL3,RPL35A,RPL8,RPLP2,RPS16,RPS19,RPS20,RPS24,RPS3,S100A10,SLC16A7,SPARC,TERT,TIMP2,TM6SF1,TMED9,TMPRSS2,TP53,TPI1,TPM1,TUBA1B,TUBB,TUFM,Uchl1,VIM,ZEB2                                                                                                                                                                                                                                                                                                                                                                                                                                                                                                                                                                                                                                                                                                 |

|              |       |                                 |           |        |        |        |          |          |                                                                                                                                                                                                                                                                                                                                                                                                                                                                                                                                                                                                                                                                                                                                                                                                                                                                                                                                                                                                                                                                   |
|--------------|-------|---------------------------------|-----------|--------|--------|--------|----------|----------|-------------------------------------------------------------------------------------------------------------------------------------------------------------------------------------------------------------------------------------------------------------------------------------------------------------------------------------------------------------------------------------------------------------------------------------------------------------------------------------------------------------------------------------------------------------------------------------------------------------------------------------------------------------------------------------------------------------------------------------------------------------------------------------------------------------------------------------------------------------------------------------------------------------------------------------------------------------------------------------------------------------------------------------------------------------------|
| levodopa     |       | chemical - endogenous mammalian | Inhibited | -2,350 | -2,336 | 0,001  | 1,70E-10 | 5,68E-09 | ACKR1,ADAR,ADD3,AGPAT1,ALPL,AMZ2,ARAF,ARC,AREL1,ARG2,ASPCR1,AXL,BAX,C1GALT1C1,C1QA,C8B,CACNA2D3,CACNB2,CAP1,CAPG,CASP3,CBR3,CCND1,CCS,CD200,CD63,CHST8,CIB2,CLN6,COA4,COL4A1,COMT,COTL1,CRY2,CRYM,CTNBP1,CTSB,CTS2,CXCL12,CYP2A6 (includes others),DDOST,DMTN,DUSP1,EIF4EBP2,EIF4G2,EIF6,FAAH,FAH,FAH3,FCGRT,FKBP5,FOS,FOSB,FOSL1,FOXO1,FRAT2,FTL,FXD5,GABARAPL1,GADD45B,GLB1,GNAS,GNB5,GNG7,GOLIM4,GPC3,GPD1,GPS1,GRB10,GUCY1A1,HCLS1,HECW1,HEXB,HLA-A,HTATIP2,HTR1B,IDO1,IFNAR2,IQGAP1,ITGB1BP1,KCNA6,KDM5B,KLF9,KYAT1,LAPTM5,LRR1,LYPD1,LZTS3,MAP3K1,MAPKAP1,MAT2A,MEF2C,MEIS2,MRPL48,MSMO1,MSRB1,MYO1B,NAB2,NAGLU,NASP,NCF4,NDUFS4,NEDD4L,NIT1,NOCT,NUAK1,PALM,PAOX,PAR6A,PARM1,PCYT2,PDCC4,PDZD2,PER1,PFKP,PGPEP1,PKP2,PLEK,PLEKHO2,PLK2,PRKD3,PTPRT,PVALB,RAB8A,RASGRP1,RENBP,RESF1,RFC2,RUNDC3B,S100A10,SCRN1,SDR39U1,SFXN3,SH3BGL3,SH3GL2,SHC1,SLC22A17,SLC22A18,SLC25A44,SMUG1,SOBP,ST3GAL5,STAB1,STXBP1,SUB1,TAC1,TBP,TCF4,TCIRG1,TIAM1,TLE1,TMC6,TMED10,TP53,TRIB3,TRIOBP,UAP1L1,UBFD1,UBL3,UBXN6,UPB1,VLDLR,VPS13A,VTI1B,WDR1,WIPF1,ZEB2,ZMYND8,ZNF70 |
| FGF2         |       | growth factor                   |           | 0,990  | 1,036  | 0,005  | 2,01E-10 | 6,68E-09 | ACE,ADGRL2,ADM,AFP,AKR1B1,ALB,ANG,AQP3,ARC,BAX,BCL6,C1QL1,CALB1,CAPZA2,CAV1,CBFB,CCL20,CCN3,CCND1,CCND2,CND3,CDH11,CDKN1B,CDX2,CIDEC,COL1A1,COL1A2,COL3A1,CTSK,CXCL12,CXCL6,CXCR4,DCN,DDIT3,EFNB2,ENO1,ENPP2,F3,FAH,FAH3,FBN1,FDX1,FGFR3,FLNA,FN1,FOS,FOSL1,FOXO1,FOXO4,FUT3,GADD45A,GBP1,GCH1,GJA1,GPNMB,HIF1A,HPSE,ICAM1,ID2,ID3,IGFBP4,ITGA3,KL,KRAS,MACROD1,MAPT,MCAM,MET,MGP,MIF,MMD,MMP1,MMP2,MMP9,NKX2-5,NOS2,NR4A1,PCNA,PDGFRA,PLK2,PPP1R12A,PRKCD,PTPRE,PTTG1,RB1,S100A10,S100A4,S100A8,SCD,SDC1,SFRP1,SHBG,SLC34A1,SPARC,SPP1,SPRY1,SPRY2,ST3GAL1,ST3GAL4,TAC1,TEAD4,TGFBR3,TIMP1,TNFSF10,TP53,VCAM1,VEGFA,VEGFC,VIM,VWF,WNT10R,XRCC5,ZNF70                                                                                                                                                                                                                                                                                                                                                                                                             |
| ID3          | 0,581 | transcription regulator         |           | -0,243 | -0,248 | -0,001 | 2,97E-10 | 9,73E-09 | ADGRG1,ADM,BCL6,BMP7,CCL5,CCNB1,CCND2,CCNG1,CCR5,CCR7,CD44,CD83,CDC25B,CDK1,CDKN1B,CDKN2C,CSF2RB,CXCL1,CXCR4,DUSP1,DUSP2,ELOVL6,FCER1G,FOXO1,GADD45B,GADD45G,GNL3,HIF1A,ICAM1,ID3,IFI16,IFNGR1,IFNGR2,IGFBP4,IL10RA,IL2RB,IL4R,IL6R,IL7R,IRF8,ITGB3,LEPR,LGALS1,LTB,MAF,MMP2,MMP9,MYB,NPPA,NR4A1,NR4A3,PIK3C2B,PIK3IP1,RORA,SDC1,SEL1,SH2D1A,SMAD7,SOX13,SOX4,STAT4,TCF4,TGFBR3,TNFSF10,TP53,TRAF5,VCAM1                                                                                                                                                                                                                                                                                                                                                                                                                                                                                                                                                                                                                                                          |
| CCN1         |       | other                           |           | 1,677  | 1,715  | 0,007  | 3,64E-10 | 1,18E-08 | BAX,C3,CCND1,CCND2,COL1A1,COL1A2,CXCL10,DVL1,ESR1,FCE R1G,FN1,HIF1A,IL10RB,IL18,ITGA2,ITGA3,ITGAV,ITGB3,MIF,MMP1,MMP2,MMP9,NOS2,NR4A1,PECAM1,SEN2,SFRP1,TIMP1,TIMP2,TLE1,TLR4,TLR7,TNFSF10,TOLLIP,TP53,VEGFA,VEGFC,WIF1                                                                                                                                                                                                                                                                                                                                                                                                                                                                                                                                                                                                                                                                                                                                                                                                                                           |
| PRDM1        | 0,092 | transcription regulator         |           | -1,747 | -1,765 | -0,002 | 3,84E-10 | 1,24E-08 | ACOX2,ADA,ADGRG1,AFP,AIM2,ALPL,APOM,AQP3,ARG2,ATP9A,BCL2A1,BCL6,CCL20,CCR7,CD44,CD53,CD74,CD86,CFH,CLDN1,CXCL6,CXCR4,ERAP1,ESR1,FAR2,FGR,FOS,FOSL1,FZD2,GAD1,GNLY,GPX5,HLA-DQA1,HLA-DRA,ID3,IDO1,IGHM,IL7R,IRF8,JCHAIN,KRT81,LGALS1,MAFB,ME1,METTL7A,MMP25,MS4A4A,NOS2,PLA2G4A,PLAAT4,PLAC8,PRF1,PSMB10,PSMB8,RASSF2,REG1A,RSAD2,S100A8,S100A9,SELL,SERPINA3,SLC16A5,SLC2A5,ST14,SWAP70,TAPBP,TNFAIP6,TNFRSF10D,TNFRSF17,TNFSF10,TREH,TRIM38,XBP1,XRCC5                                                                                                                                                                                                                                                                                                                                                                                                                                                                                                                                                                                                           |
| IFNA1/IFNA13 |       | cytokine                        | Activated | 4,826  | 4,860  | 0,007  | 4,24E-10 | 1,37E-08 | CCL8,CD40,CD69,CD83,CD86,CXCL10,CXCL11,CXCL9,IFI27,IFI6,IFIH1,IFIT2,IFITM1,IRF1,IRF7,ISG15,MX1,OAS1,OAS2,PLAAT4,PLSCR1,RSAD2,SIGLEC1,STAT1,STAT4,TLR3,UBE2D1,UBE2E1,UBE2L6                                                                                                                                                                                                                                                                                                                                                                                                                                                                                                                                                                                                                                                                                                                                                                                                                                                                                        |
| IL1A         |       | cytokine                        | Activated | 3,666  | 3,722  | 0,007  | 4,44E-10 | 1,43E-08 | ABCC2,ADAMTS1,ALDH1A3,ALDH3A2,ATF3,BAX,BIRC2,BIRC3,BTN3A3,CA2,CCL20,CCL5,CCL8,CCR2,CD40,CD44,CD83,CD86,CTSK,CXCL1,CXCL10,CXCL12,CXCL6,CYP17A1,CYP2B6,CYP3A4,PPP4,F2RL1,FAM89B,FAS,FGF7,FOS,FOSB,FOSL1,GBP1,GCH1,HSD11B2,ICAM1,IFNGR1,IFNGR2,IK,IL13,IL18,IL32,IRAK1,IRF1,ITGAV,ITGB3,JAM2,KITLG,LCN2,MCAM,MMP1,MMP2,MMP9,NFKB1,NGF,NOS2,NR2F2,PDZK1IP1,PLA2G4A,PTGES,RHCG,S100A8,S100A9,SERPINA3,SOD2,SPARC,SPP1,SSTR2,TAC1,TLR2,TNFRSF11B,VCAM1,VEGFC                                                                                                                                                                                                                                                                                                                                                                                                                                                                                                                                                                                                            |

|                |        |                                   |           |        |        |        |          |          |                                                                                                                                                                                                                                                                                                                                                                                                                                                                                                                                                                                                                                                                                                                                                                                                       |
|----------------|--------|-----------------------------------|-----------|--------|--------|--------|----------|----------|-------------------------------------------------------------------------------------------------------------------------------------------------------------------------------------------------------------------------------------------------------------------------------------------------------------------------------------------------------------------------------------------------------------------------------------------------------------------------------------------------------------------------------------------------------------------------------------------------------------------------------------------------------------------------------------------------------------------------------------------------------------------------------------------------------|
| AR             | 0,022  | ligand-dependent nuclear receptor |           | 1,854  | 1,912  | 0,006  | 4,72E-10 | 1,51E-08 | ABCG1,ACTR3,ADM,AQP3,ATP1A3,AZGP1,BASP1,C3,CA4,CALU,CAMK2A,CAST,CAV1,CAV2,CCNA2,CCND1,CCT3,CDC25B,CDH11,CDK14,CEND1,CGA,CKAP4,CLCN1,CLDN3,COL3A1,CTSO,CXCL12,CYC1,CYP17A1,DCTPP1,DHCR7,DNAJB9,DNM1L,DSG2,EBP,ELMO1,EPHX1,ERBB3,ESPL1,FAM89B,FGF7,FKBP4,FKBP5,GJA1,GPD1,GPX5,GSTP1,GUCY1A1,HOPX,HSD3B2,HSPA5,IL1R1,IMPDH2,INHA,INPP4B,ITGA2,KCNJ2,KIF22,KITLG,LAMA5,MAD2L1,MAOA,MC2,MECOM,MEF2C,MME,MRAS,MSMO1,MT1X,MTHFD2,MUC1,MYB,MYL3,MYO1B,NAP1L1,NDRG1,P4HA1,PBK,PCBD1,PCSK1N,PDGFRA,PDIA5,PEMT,PER1,PFKFB2,PIGR,PLOD2,PLS3,PRKCA,PRKCD,PTEN,PTGS1,RARRES1,RGN,RHOB,SCN4A,SERPINA3,SERPINA5,SGK1,SHBG,SLC22A4,SLCO3A1,SMTN,SPP1,SRD5A2,STAT1,STK39,TACC2,TACSTD2,TBXAS1,TERT,TFF3,TGFBR2,TIMP2,TJP1,TMPRSS2,TNFAIP2,TNFSF10,TNNT2,TPD52L1,TPX2,TSPAN8,UBE2C,VCAM1,VEGFA,VIM,WIPF1,WT1,XBP1,ZNF101 |
| IRF3           | 0,066  | transcription regulator           | Activated | 4,689  | 4,747  | 0,008  | 4,81E-10 | 1,53E-08 | ABCC2,ADAM9,ADAR,AHNAK,ANOS1,ANXA4,APOBEC3B,ARG2,B2M,B4GALT5,BIRC2,BIRC3,CCL19,CCL5,CD40,CD58,CD69,CD86,CDH11,CLIC4,CXCL1,CXCL10,DDX58,DDX60,FAS,FGF1,FN1,GBP1,HLA-A-F,IFI16,IFI27,IFI44,IFI6,IFIH1,IFIT2,IFIT3,IFNA10,IL15,IRF1,IRF7,ISG15,ISG20,LCN2,MFAP2,MMP9,NOS2,OAS1,OAS2,OAS3,PAH,PARP12,PHF11,PLAC8,PLAG1,PNP,PRNP,PTMS,RSAD2,STAT1,TAP1,TDK7,TLR3,TLR4,TNFSF10,TPST1,UBE2L6,VIM                                                                                                                                                                                                                                                                                                                                                                                                             |
| FOXO4          | -0,393 | transcription regulator           |           | -1,622 | -1,632 | -0,002 | 5,07E-10 | 1,61E-08 | ACACA,ANXA3,BCL6,BNIP3,C1QA,CASP8,CAV1,CCND1,CCND2,CDH5,CDKN1B,COL4A1,COL4A2,ELOVL6,ENPEP,FYN,GADD45A,GADD45B,HIF1A,IDI1,IGFBP7,IL10RB,IL1R1,ITGAM,ITGB2,LCP2,LEMD3,MMP9,NAMPT,OVOL1,PRKCD,PTGS1,PTPRC,SCD,SELL,SGK1,SOD2,SPTLC2,VCAM1,VEGFA                                                                                                                                                                                                                                                                                                                                                                                                                                                                                                                                                          |
| TSC2           | -0,151 | other                             |           | -0,296 | -0,328 | -0,005 | 5,44E-10 | 1,72E-08 | A2M,ANXA1,ANXA2,ARC,ATF3,ATP6V1B2,ATP6V1D,BAX,CASP1,CCND1,CCND2,CCND3,CDKN1B,CRIP1,CST6,CXCL10,DDIT3,EMP3,FOS,FZD2,GGA2,GPNMB,HIF1A,HMGCS2,HSPA5,MAOB,METRN,MGP,NEU1,NFE2L1,NIBAN1,NSDHL,OGG1,OLFM4,PDGFRA,PDK4,PLP2,PRKCA,PSMB5,PSMD1,PTEN,PVALB,S100A11,S100A6,SCD,SMPDL3A,SOD2,STAT1,UCP2,ZFP36                                                                                                                                                                                                                                                                                                                                                                                                                                                                                                    |
| SOCS1          | 0,094  | other                             | Inhibited | -3,852 | -3,902 | -0,007 | 5,57E-10 | 1,74E-08 | A2M,BAX,BCL2A1,BID,CCND1,CCND2,CCND3,CCR7,CD1D,CD40,CD44,CD69,CD86,CISH,CXCL10,DDX58,DUSP1,FAS,FCER1G,FKBP5,FOS,ICAM1,IFI16,IFI44,IFIH1,IFIT2,IFIT3,IL15,IL2RB,IL4R,IRF1,IRF7,ISG15,ISG20,MMP1,MUC1,MX1,MYD88,NOS2,OAS1,OAS2,RALGDS,RB1,RSAD2,STAT1,STAT3,TLR3,TRIM22,TXN,VAV1,VCAM1                                                                                                                                                                                                                                                                                                                                                                                                                                                                                                                  |
| KDM5B          | 0,407  | transcription regulator           | Inhibited | -4,162 | -4,196 | -0,005 | 5,57E-10 | 1,74E-08 | ARL6IP5,ASF1A,AURKA,CAV1,CCNB1,CCND1,CDK1,CDKN1B,CLDN1,CYB5A,DDIT3,DLGAP5,DPY19L1,ECT2,EHD1,EIF5B,ERBB3,ESR1,FHL1,GADD45A,GCA,HACD1,HSD17B8,ISG15,ITGB1BP1,LGALS3BP,MCAM,MCM2,MCM3,MIA3,MPC1,MT1F,MT1X,NDC80,NEDD9,NKX2-5,OIP5,PBK,PLS3,PRLR,PSD3,PSIP1,RECQL,RNASET2,SNRPD1,SWAP70,TMEM14A,TOP2A,TTK,TUBB2A,XBP1                                                                                                                                                                                                                                                                                                                                                                                                                                                                                     |
| NOS2           | -0,356 | enzyme                            |           | 1,864  | 1,873  | 0,001  | 5,63E-10 | 1,76E-08 | ACO1,ADH5,ALDH3A1,AVP,AZGP1,BAX,BCL2A1,BNIP3,CASP3,CD14,CD44,CD53,CD86,CFD,COL4A1,COX6A2,FAS,FOXO1,G6PC,GJA1,GPD1,GPT,HIF1A,HMGB2,IFIT3,IL32,IRAK1,ISG15,KRT4,LCK,LCN2,LGALS3BP,LPAR1,MAPK8,MCM5,MMP9,MYL3,NKX2-5,NOS2,NPPA,PC,PCNA,PERP,PIGR,PLSCR1,PPARGC1A,PRF1,PTGS1,S100A8,SERPINA3,SFXN1,SLC1A5,STXB1,THY1,TIMP1,TKT,TLR4,TNFSF10,TNNC1,TNNT2,TOR3A,TSPYL2,TYROBP,VEGFA                                                                                                                                                                                                                                                                                                                                                                                                                         |
| PI3K (complex) |        | complex                           | Activated | 1,998  | 2,050  | 0,007  | 5,79E-10 | 1,80E-08 | ADIPOR1,ADRB2,ALOX5AP,ATF3,BIRC3,CASP3,CCNB1,CCND1,CCND2,CCND3,CCT6A,CD2,CD44,CD55,CD86,CDKN1B,COL1A1,CTCF,CTSD,CXCL10,CXCR4,CYBB,DDIT3,DUSP1,FHIT,FLI1,FN1,FOS,FOSL1,FOXO1,GCLC,GCLM,GJA1,GSTA1,GSTP1,HIF1A,HK1,ICAM1,IL33,IL7R,INHA,IRF2,ITGAM,ITGB2,KRAS,LCN2,LSP1,MCAM,MEF2C,MMP1,MMP2,MMP9,MRC1,MTHFD2,NCL,NFE2L2,NME1,NOS2,NOX4,NPPA,OSTF1,PDCD4,PLA2G4A,POSTN,PRDX2,PRKCZ,PTPN12,RHOB,RND3,RPL23,SAMHD1,SELL,SGK1,SLC12A6,SNCG,SOAT1,SPP1,SST,STMN1,TLR4,TNFSF10,TP53,TXNIP,UGCG,VCAM1,VEGFA,WT1,XBP1                                                                                                                                                                                                                                                                                          |
| HOXA10         | 0,338  | transcription regulator           |           | -0,375 | -0,400 | -0,003 | 6,16E-10 | 1,90E-08 | ACTB,ADM,ALOX5AP,ALPL,APOE,AQP1,ARL2,CD1C,CFD,COL15A1,COL3A1,CSTA,CTSV,CYBB,DHRS9,DPP4,ENPP2,FCER1G,FKBP3,FN1,FZD5,GJA1,GSTA3,HLA-DQA1,HLA-DQB1,ID1,ID2,IL1R1,ITGB3,KAT5,KLF9,KRT4,LCN2,LEPR,LTF,LYZ,MAPK12,ME1,MEIS2,MFNG,MSN,NCF2,NR4A1,NUP214,P4HB,PBX3,PHGDH,PIGR,PRKCD,PROM1,PTGER3,RBP1,RHOG,SCD,SSPN,ST6GAL1,STK17B,TDO2,TGFBR3,TP53,WNT10B,ZNF22                                                                                                                                                                                                                                                                                                                                                                                                                                              |

|        |        |                               |           |        |        |        |          |          |                                                                                                                                                                                                                                                                                                                                                                                                                                                                                                                                                                                                                                                                                                                                                                                                                                                                                                            |
|--------|--------|-------------------------------|-----------|--------|--------|--------|----------|----------|------------------------------------------------------------------------------------------------------------------------------------------------------------------------------------------------------------------------------------------------------------------------------------------------------------------------------------------------------------------------------------------------------------------------------------------------------------------------------------------------------------------------------------------------------------------------------------------------------------------------------------------------------------------------------------------------------------------------------------------------------------------------------------------------------------------------------------------------------------------------------------------------------------|
| Jnk    |        | group                         | Activated | 2,291  | 2,340  | 0,006  | 6,36E-10 | 1,96E-08 | A2M,ANXA5,BAX,BIRC3,CASP3,CCL5,CCND1,CCR7,CD40,CD44,C<br>D55,CD69,CD83,CD86,CELF2,CLEC10A,COL1A1,COL3A1,CRIP2,C<br>XCL12,CXCL6,CXCR4,DDIT3,DNMT1,DUSP1,F12,F2RL1,F3,FAS,FLI<br>1,FN1,FOS,FOSB,GADD45A,GJA1,HNF4A,HSPA5,ICAM1,IL13,JUND<br>,LHB,MMP1,MMP2,MMP9,MRC1,MSH2,NFE2L2,NOS2,NOX4,NR4A1<br>,PLG,PLSCR1,PON2,POSTN,PPM1D,PTEN,PTGES,RARG,RBP1,RX<br>RA,SOD2,STRA6,TBP,TERT,TGFBR2,TIMP1,TP53,VCAM1,VCAN,Z<br>FP36                                                                                                                                                                                                                                                                                                                                                                                                                                                                                    |
| GDF2   | -0,204 | growth<br>factor              |           | 1,069  | 1,123  | 0,009  | 6,46E-10 | 1,98E-08 | ABCG2,ANKH,ANXA3,BID,CAV1,CDH11,CDH6,COL1A1,CRABP1,C<br>XCL12,CXCR4,EFNB2,ENG,ENPP2,FGFR3,FOS,GADD45B,HIF1A,H<br>SPB8,HTRA1,ICAM1,ID1,ID2,ID3,MMP9,NGF,NRP1,POSTN,SEMA3<br>B,SERPINE2,SERPINF1,SLC3A2,SMAD1,SMAD7,SOCS2,SPP1,TLR<br>4,VCAM1,YWHAH                                                                                                                                                                                                                                                                                                                                                                                                                                                                                                                                                                                                                                                          |
| ERK    |        | group                         | Activated | 2,021  | 2,070  | 0,006  | 7,80E-10 | 2,37E-08 | ACP5,ACSL5,ACTN1,ADAM10,APOBEC3G,ARG2,ARPC2,AXL,BAX,<br>CAV1,CCND1,CCND3,CD1D,CDKN1B,CGA,CLU,COL1A1,COL3A1,<br>CTSK,CXCL1,CXCL10,CXCL6,DPYSL2,DUSP1,ESR1,ESRRA,EZH2,<br>FAS,FN1,FOS,FOSL1,FOXO1,GCLC,GK,GOT1,HOXA1,ICAM1,IFNA<br>R2,ITGAM,ITGAV,ITGB2,ITGB3,KYNU,LAMB1,LCN2,MAFB,MAFF,M<br>AL,MAP4K4,MCAM,MMP1,MMP2,MMP9,MS4A1,MUC1,NDRG1,NFE2<br>L2,PDK4,PECAM1,PTGES,RECK,ROCK1,RORC,SELL,SFN,SOX4,S<br>TAT1,TERT,TIMP1,TNFAIP8,TP53,TUBA1A,UGCG,VCAN,VEGFA,ZF<br>P36                                                                                                                                                                                                                                                                                                                                                                                                                                    |
| PSEN1  | 0,039  | peptidase                     |           | -1,706 | -1,713 | -0,001 | 7,93E-10 | 2,40E-08 | ABCC6,ABCG1,ABCG2,ACO2,ACSL1,ACTB,ACTG1,ALB,APOE,AR<br>C,ARF4,ATOX1,ATP1A3,ATP5F1D,ATP6V1E1,AXL,BACE1,BASP1,B<br>AX,C1QA,C1QB,C1QBP,C1R,C1S,C3,C3AR1,CALML3,CAP1,CASP3<br>,CCDC25,CCL5,CCND1,CCR5,CCS,CD74,CD9,CLTB,COX8A,CRYM,<br>CTSD,CTSS,CTSZ,CYFIP2,CYTIP,DNM1L,DPYSL2,DSTN,DUSP1,E<br>NO1,ENPP2,EPM2A,ERMP1,FOS,FZD4,GADD45B,GJA1,GNB1,GOT<br>2,GPM6B,GPX5,GSTP1,HK1,HLA-<br>E,HSPA5,HSPA8,INSR,IRF7,KCNAB2,MAPT,MME,MMP9,MTOR,ND<br>UFS4,NME1,NOS2,OCEL1,PDGFRA,PDXDC1,PEA15,PEBP1,PKM,P<br>RC1,PSENE1,PTPRF,PVALB,QDPR,SH3GL2,SOD1,STAB1,STMN1,<br>STXBP1,SUCLG1,TGFBR2,TIPARP,TP53,TP11,TUBA1A,TU<br>BA1B,TUBB,TUBB2A,TUBB4B,TUBB6,TUFM,TXN,UCHL1,VAMP2,W<br>ARS1,YWHAH                                                                                                                                                                                                                           |
| SP3    | 0,291  | transcriptio<br>n regulator   |           | 1,497  | 1,523  | 0,005  | 7,98E-10 | 2,41E-08 | ACSL1,ADD3,ADH5,AEBP1,AKAP12,ASNS,ATF3,CCL20,CCND1,CD<br>2AP,CD40,CDC25B,CDKN1B,CDKN2C,COL1A1,COL1A2,CYP17A1,<br>CYP46A1,DUSP1,ESR1,F3,FAS,FDX1,FOS,FOSL1,GHR,GNAI2,HPS<br>E,HSD11B2,HSPA5,IL2RB,ITGA2,ITGB8,JAM2,KRT81,MAOB,MAT2<br>A,MET,MMP2,MSH6,NCF2,NFKB1,PEMT,PKM,PRKCD,PRLR,PROC<br>R,PTDSS1,PTGS1,PTTG1,RECK,RRAS,SGK1,SLC9A3,SOD2,SPAR<br>C,STAT1,STAT3,TERT,TGFBR2,TGFBR3,TIMP1,TIMP2,TLR2,TNC,T<br>NNC1,TP53,TSPO,VEGFA,VIM<br>B2M,BCCIP,CCL5,CCN3,CD74,CXCL10,CXCL11,FOS,HLA-C,HLA-<br>DPA1,HLA-DPB1,HLA-DRA,HLA-<br>E,ISG20,LTB,MLLT3,NEDD9,PPP1R12A,PSMB9,RPL35A,S100A8,S<br>AFB2,TBX2,TNFRSF11B,TNFSF10,UBD,UBE2B,UQCRC2<br>ACAT1,CA2,CAV1,CAVIN1,CCND1,CCND2,CDK1,CGA,CKM,COL1A<br>2,CTSB,CTSV,CXCL10,DOK1,DUSP1,ENO1,F3,FGR,FN1,FOS,FOSL<br>1,GBP1,GJA1,HIF1A,ICAM1,ID1,LHB,MMP1,MMP2,MMP9,NFKB1,NP<br>PA,POSTN,PRKCA,PRKCD,PTH1R,RETSAT,SPP1,STAT3,TFPI2,TJ<br>P1,VCAM1,VEGFA,VEGFC,VIM |
| SAFB   |        | other                         | Inhibited | -4,013 | -4,048 | -0,007 | 8,15E-10 | 2,45E-08 | CXCL10,CXCL11,DDX58,IDO1,IFI44,IFI6,IFIH1,IFITM1,IL18,ISG15,LA<br>MP3,MX2,OAS1,OAS2,PSMB10,PSMB8,PSMB9,RIPOR2,TLR3,TNF<br>SF10,TRIM22,UBA7,UBD,UBE2L6,XAF1                                                                                                                                                                                                                                                                                                                                                                                                                                                                                                                                                                                                                                                                                                                                                 |
| SRC    |        | kinase                        |           | -0,070 | -0,035 | 0,006  | 8,32E-10 | 2,50E-08 | BHLHE40,CCN3,CD59,CDH6,CDKN1B,COL1A1,COL1A2,COL3A1,C<br>OL5A1,ENG,F2RL1,FN1,FOS,FOSB,GJA1,HTRA1,ITGAV,ITGB3,JUN<br>D,MGP,MICAL2,MMP1,MMP2,MMP9,MS4A1,PALLD,PLOD2,PPARG<br>C1A,PTEN,SCD,SDC3,SERPINE2,SMAD2,SMAD7,STAT4,TGFBR3,<br>TJP1,TNC,TNFRSF11B,TNS1,TPM1,TSPAN13,VEGFA,ZEB2                                                                                                                                                                                                                                                                                                                                                                                                                                                                                                                                                                                                                          |
| IFNAR2 | 0,380  | transmem<br>brane<br>receptor | Activated | 3,230  | 3,257  | 0,008  | 9,69E-10 | 2,86E-08 | ACADM,ACADS,ACSL1,ANXA3,ATP5F1D,BAX,CALU,CAPG,CAVIN3<br>,CBFB,CCL5,CD300A,CD36,CD37,CD38,CD48,CD53,CD84,CD93,C<br>DK1,CDKN1B,CLU,COL18A1,COL1A1,COL3A1,COL4A1,COL4A2,C<br>OX6A2,CPT2,CSHL1,CTSD,DDIT3,ESR1,FOS,GPER1,GRB10,HADH<br>A,HIF1A,HSPA5,HTRA1,ID2,IFNGR2,IGFBP4,ITGAM,KIF20A,KRT19,<br>MYOM2,NDN,NDUFA3,NME1,NR4A1,PDCD10,PDLIM2,PECR,PKM,<br>PROM1,RAC1,RBBP7,RFC2,RHOA,RPL3,RPL35A,RPS21,RPS24,S1<br>00A4,SCP2,SLC25A20,SLC2A2,SNCG,SST,STAT3,TGFB1,TJP1,TM<br>EM87A,TNFSF10,TNNI1,TP53,TXN,UQCRC1,UQCRC2,VEGFA,VEG<br>FC                                                                                                                                                                                                                                                                                                                                                                       |
| TGFB3  | -0,082 | growth<br>factor              |           | 1,788  | 1,832  | 0,007  | 1,09E-09 | 3,17E-08 |                                                                                                                                                                                                                                                                                                                                                                                                                                                                                                                                                                                                                                                                                                                                                                                                                                                                                                            |
| IGF1R  | -0,136 | transmem<br>brane<br>receptor |           | -2,024 | -1,976 | 0,006  | 1,25E-09 | 3,62E-08 |                                                                                                                                                                                                                                                                                                                                                                                                                                                                                                                                                                                                                                                                                                                                                                                                                                                                                                            |

|            |        |                                   |           |        |        |        |          |          |                                                                                                                                                                                                                                                                                                                                                                                                                                                                                                                                                                                                 |
|------------|--------|-----------------------------------|-----------|--------|--------|--------|----------|----------|-------------------------------------------------------------------------------------------------------------------------------------------------------------------------------------------------------------------------------------------------------------------------------------------------------------------------------------------------------------------------------------------------------------------------------------------------------------------------------------------------------------------------------------------------------------------------------------------------|
| GATA1      | 0,025  | transcription regulator           |           | -0,204 | -0,174 | 0,004  | 1,35E-09 | 3,88E-08 | ACTN1, ALOX5, ALOX5AP, AQP1, BACH2, BLVRB, BZW2, CA2, CALR, CAVIN1, CCL5, CCND1, CCND2, CCND3, CCR5, CD164, CD36, CDKN1B, CDKN2C, CPA3, CPD, CYBB, CYFIP1, DICER1, DMTN, EXOC1, EZH2, FER1A, FHL1, FLI1, FOSB, FYB1, GNAS, GUCY1B1, GYPA, HBB, HHEX, H PSE, HSPA9, IL13, IL6R, IL7R, INHA, IRF8, ITGB3, LEPR, LYZ, MAGED1, MCM3, MCM5, MECOM, MGST2, MS4A1, MSH2, MTHFD1, MYB, NAB2, NCL, NFIL3, NFKB1, NPPA, PCNA, PECAM1, PLEK, PLXNA1, PSTPIP2, PTPN6, RRM1, RUNX3, SASH1, SELP, SLC3A2, SLC4A1, SMARCE1, SP140, SSBP3, ST3GAL6, STAT4, TAC3, TCF4, TFDP2, TFEB, TFF3, TOP2A, UAP1, VDR, VWF |
| PIK3R1     | 0,168  | kinase                            |           | 1,401  | 1,441  | 0,007  | 1,64E-09 | 4,66E-08 | CCND1, CCND2, CD36, CDKN1B, COL1A2, CXCL10, DDIT3, DNAJB9, ENG, F3, FOS, FOXO1, GCH1, HIF1A, HSP90B1, HSPA5, ICAM1, IRF7, ISG15, MMP2, NFE2L1, NFE2L2, NOS2, PCK1, PDGFRA, PIK3CB, PKM, PTEIN, SELP, SOD2, TRIB3, TXNIP, VCAM1, VEGFA, VEGFC                                                                                                                                                                                                                                                                                                                                                    |
| ERG        |        | transcription regulator           | Activated | 2,804  | 2,857  | 0,008  | 1,93E-09 | 5,45E-08 | ACOT8, ACTN1, ADGRG1, ADRB2, APOC1, ARHGAP17, ARHGAP28, ARHGEP6, BIRC3, CCNA2, CD164, CD59, CHTOP, CXCL1, CXCR4, CYFIP1, DBN1, DOCK10, DOCK2, DSTN, ELMO1, EPB41L3, EXT1, EZH2, FHL1, FKBP5, FOLH1, FOSB, FYN, GAK, GDF2, GMFB, GUCY1A1, GUCY1B1, HDAC6, HPCAL1, HPGD, ICAM1, ICAM2, LAMA5, MET, MMP1, MMP9, NDRG1, NFIL3, ORC6, PECAM1, PHACTR2, PLEK, PRKCI, PSTPIP2, PTPN6, RHOA, RPA1, RRAS, RSU1, SLIT2, SOX4, SPARC, SPP1, TGFB2, TMPRSS2, TRIOBP, UTRN, VIM, VWF, WIPF1                                                                                                                  |
| oleic acid |        | chemical - endogenous mammalian   | Inhibited | -2,128 | -2,111 | 0,003  | 2,22E-09 | 6,21E-08 | ACACA, ACADL, ACADM, ACSL1, ALOX5, APOE, AQP3, BAX, CD36, CLU, CYP4F12, CYP4F2, DDIT3, DUSP1, FABP1, FABP2, FOS, G6PC, GADD45A, GADD45B, GCLC, HSPA5, ICAM1, LCN2, LHB, MLXIPL, MTPP, NOS2, NR1H3, NR4A1, PCK1, PDK4, PIK3IP1, PLIN2, PLIN3, PNPLA3, PPARA, PPARGC1A, PTEN, RXRA, SCD, SOAT1, TLR2, UCP2, VCAM1                                                                                                                                                                                                                                                                                 |
| EIF2AK2    | 0,249  | kinase                            | Activated | 3,020  | 3,074  | 0,009  | 2,24E-09 | 6,25E-08 | ATF3, BAX, BCL2A1, BHLHE40, BIRC2, CCND1, DDIT3, DDX58, EGOT, FAS, FOS, IFI27, IFI35, IFI6, IFIT5, IFITM1, IFITM2, IRF1, ISG15, ISG20, LGLS3BP, MMP9, NEDD9, NMI, NNMT, NOS2, OAS1, OAS3, PARP12, PLSCR1, PPP1R15A, PSMB10, SAMHD1, SOD2, SP140, STAT1, TP53, TUBA1A, UBE2L6, ZNF292                                                                                                                                                                                                                                                                                                            |
| PPARD      |        | ligand-dependent nuclear receptor | Inhibited | -2,167 | -2,134 | 0,004  | 2,40E-09 | 6,64E-08 | ACAA1, ACAA2, ACACA, ACACB, ACADL, ACADVL, ACOX1, ALDH2, ALDH3A2, ALDH9A1, ANGPTL3, APOA1, APOA4, APOE, AQP3, C1QA, C1QB, CCND1, CCND2, CD36, CDK1, CDKN1B, CLEC7A, CPT2, CYP2B6, ECH1, EC12, FABP1, FBP1, FN1, GOT2, GPD1, HMGCS2, HSD11B2, ICAM1, IFI44L, KYAT1, LRP5, MLYCD, MMP9, MYOM2, NOS2, NPPA, OCEL1, PCNA, PCYOX1, PDK4, PKLR, PLIN2, PNPLA2, PPARGC1A, PTEN, RASGRP1, RBP1, S100A6, SCD, SLC10A2, SLC25A20, SLC27A2, SLC2A2, ST3GAL5, STAT1, TLR5, TNFRSF11B, TP53, UCP2, VEGFA, VLDLR, YWHAE, ZBED5                                                                                |
| LDLR       | -0,410 | transporter                       |           | -0,838 | -0,847 | -0,003 | 2,59E-09 | 7,16E-08 | A1CF, ABCG1, ACACA, APOE, AURKA, C1QA, CCL5, CCNA2, CCNB1, CCNB2, CCND1, CCR2, CCR5, CD36, CD40, CD47, CD55, CDC25B, CDK1, CFB, CX3CR1, CYP27A1, CYTIP, DDIT3, DHRS9, DUSP1, ELOVL6, F3, FGL2, FPR1, G6PC, GADD45G, GATM, GJA1, GPT, HSPA5, ICAM1, IRF7, ITGB3, KIF20A, LAIR1, LCN2, LCP2, LSP1, LY86, LYZ, MIF, MMP2, MMP9, NR1H2, NR1H3, PCYT2, PLTP, PPARA, PPARGC1A, PPP1R15A, PRC1, PSMB7, PSMB9, SC5D, SCD, SPP1, TAP1, TLR1, TOP2A, UBE2C, VCAM1, VCAN, VLDLR                                                                                                                            |
| EDN1       | 0,329  | cytokine                          | Activated | 2,443  | 2,497  | 0,008  | 2,78E-09 | 7,66E-08 | ACTB, ANXA1, ANXA4, ANXA5, AVP, BCL2A1, CALCRL, CCND1, CCR7, CDK1, CDKN1B, COL1A2, COL4A1, COL5A1, CXCR4, CYBB, ENAH, FN1, FOS, FOSB, FOSL1, GJA1, GRN, HIF1A, HSPA5, HSPA8, ICAM1, IL18, INSR, ITGA2, ITGAM, ITGAV, ITGB3, LEPR, MARCKSL1, MCAM, MMP1, MMP2, MMP7, MMP9, MSN, MYL6, NOX5, NPPA, PDIA6, PLCB4, PLOD1, PPARA, PRKCA, PRKCD, PTGS1, RAB3A, SDC1, SELL, SOD1, TIMP1, TNC, TP53, VCAM1, VCAN, VEGFA, VEGFC, VIM, VWF, YWHAE                                                                                                                                                         |
| WT1        | -0,458 | transcription regulator           |           | 0,738  | 0,747  | 0,001  | 2,84E-09 | 7,81E-08 | ACTN1, ADGRE5, AHCY, ANXA11, APRT, ARL2, ASNS, BCL2A1, CAPRIN1, CCND1, CD2AP, CDKN2C, CIRBP, CKM, CLIC1, CLIC4, COL4A1, CSF1R, CTSV, CXCL10, ESR1, ETFA, EXT2, FGF1, FOSB, GRB10, GSR, HSP90B1, IDI1, IFRD2, IL2RB, INHA, INSR, IRF8, ITGAM, ITGB1BP1, JUND, KRAS, MAPK8, MMP2, MMP9, MPP1, MT1X, MYL6, NDRG1, NME1, NPHS1, NQO2, NTRK2, NUCB1, PCK2, PDE8A, PDIA4, PECAM1, PPIB, ROCK1, SALL2, SDC1, SLC35G2, SPRY1, SRSF6, ST6GAL1, TARS1, TERT, TM4SF1, TRAP1, TRIM21, TSC22D1, TYROBP, VDR, VEGFA, WARS1, WT1                                                                               |
| EPAS1      | -0,039 | transcription regulator           |           | -0,983 | -0,935 | 0,007  | 3,21E-09 | 8,79E-08 | ABCG2, ACACA, ACP5, ADM, AKAP12, ARG2, AXL, BHLHE40, BIRC3, B NIP3, C1QA, CAT, CAV1, CCND1, CCR2, CCR5, CDCP1, CKM, CLDN1, CORO1A, CXCR4, CYBRD1, DDIT3, DECR2, DGAT1, DMXL1, ENO1, FABP2, FHL1, FMO5, FN1, FOS, GADD45B, GAL3ST1, GCHFR, GJA1, GLS, HIF1A, HSPA5, ITGAV, ITGB3, MAFF, MANF, MIF, MYO7A, MYOM2, NAMPT, NDRG1, NFIL3, PFKFB3, PLIN2, PLOD2, PRKCA, SLC16A4, SLC29A1, SOD1, SOD2, STC2, TERT, TGFB2, TMEM45A, TNFRSF11B, TNNT1, TP53, TPP2, TRIM21, VEGFA, WNT10B, ZNF423                                                                                                         |

|             |        |                                 |        |        |        |          |          |                                                                                                                                                                                                                                                                                                                                                                                                                                            |
|-------------|--------|---------------------------------|--------|--------|--------|----------|----------|--------------------------------------------------------------------------------------------------------------------------------------------------------------------------------------------------------------------------------------------------------------------------------------------------------------------------------------------------------------------------------------------------------------------------------------------|
| ERN1        | 0,044  | kinase                          | 1,801  | 1,831  | 0,005  | 3,23E-09 | 8,80E-08 | ACACA,ANG,AP1M2,ARF4,ATF3,BLOC1S1,CDH6,CYP1B1,DDIT3,DGAT1,DNAJB9,DNAJC10,FAS,FKBP11,G6PC,GOLGA3,GOT1,GPT,HSP90B1,HSPA5,IFITM1,ITGB6,MLXIPL,MORF4L2,MPZL2,NOS2,NOX4,NPPA,NR1H3,OAS2,P3H1,PLIN2,SCD,SCN3A,SDF2L1,SEC11A,SEC24D,SLC25A28,SLC35B1,SPARC,ST14,SYT11,TBCB,TMED3,TMPRSS2,UBE2J1,VEGFA,WARS1,XBP1                                                                                                                                  |
| STAT2       |        | transcription regulator         | 3,499  | 3,528  | 0,007  | 3,42E-09 | 9,28E-08 | CAV1,CCL19,CCL5,CD40,CD86,CXCL10,GBP1,IFI27,IFI35,IFI6,IFIT2,IFIT3,IFITM1,IFITM2,IRF1,IRF7,IRF9,ISG15,MX1,OAS1,OAS2,PSMB8,RBX1,RSAD2,RTP4,ST13,STAT1,TNFSF10,WARS1                                                                                                                                                                                                                                                                         |
| HNRNPA2B1   | 0,159  | other                           | -0,771 | -0,762 | 0,005  | 4,11E-09 | 1,10E-07 | ABCC6,ACSL5,CACNB2,CD24,CIDECL,CLDN1,CPVL,CRIP1,CTSV,CLK1,DDR1,DSE,ERBB3,FHL1,FN1,FSCN1,GJA1,HMGB3,HNMT,HYAL1,KCTD12,KRT4,LEPR,LPAR1,MEIS2,MFHAS1,MMD,MUC13,NPR3,OAS1,P4HA1,PAPPA,PHACTR2,PITPNC1,PKM,PLCB4,PLOD2,PPARGC1A,PRSS3,SEMA3B,SLC1A1,SRI,SRPX,ST8SIA4,STK32B,TFPI2,TLE1,USH1C,UTRN,VCAN,VIL1,WVVOX                                                                                                                               |
| JAK2        |        | kinase                          | 1,845  | 1,887  | 0,008  | 4,11E-09 | 1,10E-07 | ACE,ACTB,ACTN1,AKAP12,BAX,BLNK,BMP7,CASP1,CCL5,CCND1,CCND2,CD36,CDKN1B,CST7,CXCL10,CYBB,DCXR,ENPP2,ESR1,FCGR2B,FOS,FOXO1,GBP2,GCNT2,ICAM1,IRF1,JCHAIN,LCN2,LYN,MYL12A,NDN,NKG7,NOS2,NR4A1,OSMR,PECAM1,PFN1,PHLDA3,PLK2,POU2AF1,PSMB9,RBP1,SELP,SET,SLC1A3,STAT1,STAT3,TPA1,TP53,TRAM1,TSC2D1,VLDLR                                                                                                                                         |
| Mek         |        | group                           | -0,034 | -0,008 | 0,003  | 4,15E-09 | 1,11E-07 | ABCG2,ACAT1,APOE,AXL,BID,CCND1,CCND2,CCND3,CD200,CD36,CDCP1,CDKN1B,CDX2,CLU,COL1A2,CSF1R,CXCL10,CXCL11,CXCL9,DDR1,DDX58,DNMT1,ERBB3,ESR1,FOS,FOSL1,GBP2,GNL3,GPER1,HIF1A,HRH1,IDI1,IDI2,IL15,IRF1,ITGB3,LHB,MAF,MAFF,MANSC1,MMP2,MMP9,MS4A1,NGF,NOX4,NR1H3,NR4A1,OSBPL8,PDGFR,PPARGC1A,PTEN,RABGGTB,RETSAT,RND3,ROCK1,RPL23,SACS,SEMA4C,SH2B3,SLC43A3,SNCG,SPRY1,SPRY2,ST6GAL1,TFB2M,TG,TP53,TP53,VEGFC,VIM,XAF1                           |
| cholesterol |        | chemical - endogenous mammalian | 2,794  | 2,817  | 0,003  | 4,15E-09 | 1,11E-07 | ABCG1,ACAT1,ACSL1,APOE,ATF3,CASP1,CAV1,CAV2,CCR2,CCR5,CD14,CD1C,COL1A1,COL3A1,CTSK,CXCL10,CYBB,CYP27A1,DDC,DDIT3,DHCR7,EPHX1,F3,FCGR2B,FN1,GLI3,GNAI1,GNMT,HSP90B1,HSPA5,ICAM1,IDI1,IHH,IL10RA,IL10RB,ITGAM,JAK1,KITLG,LAPTM5,LEPR,LYZ,MANF,MAPT,ME1,MME,MMP1,MMP2,MSMO1,NCF2,NR0B2,NR1H3,NR4A1,NR4A3,NSDHL,PCYT2,PLTP,PMVK,PSAT1,RDH11,RHOA,S100A8,SC5D,SCD,SCP2,SLC1A3,TIMP1,TLR4,TM7SF2,TMEM123,VCAM1,XBP1                              |
| SMARCB1     | 0,106  | transcription regulator         | -0,411 | -0,372 | 0,006  | 4,24E-09 | 1,13E-07 | A2M,ACAT1,ACSL1,ACTR2,ADD3,AURKA,BAG3,BNIP3,BNIP3L,CA8,CCNA2,CCND1,CD44,CDC7,CDK1,CDKN2C,CIDEB,COL18A1,COL1A1,COL1A2,COL5A2,CXCR4,CYP2C8,CYP3A7,CYP4A11,DSG2,F11,FAS,FBP1,FOS,G6PC,GADD45A,GJA1,GJB1,IFI16,IFITM1,IFNAR2,IL15RA,MCM2,MCM3,MCM5,MMP1,MX1,OAS1,OAS3,PC,PCK1,PLCL1,POSTN,PPP1R3C,PRIM1,PTMS,RAB5C,RND3,SLC37A4,SMC4,SPARC,TP53                                                                                                |
| MAPK14      |        | kinase                          | 0,509  | 0,551  | 0,006  | 4,27E-09 | 1,13E-07 | ACP5,ALOX5AP,BACE1,BAX,CALR,CAT,CCL5,CCNA2,CCNB1,CCND1,CCR7,CD40,CD83,CD86,CKM,COL1A1,CXCL10,DAB2,DUSP1,EFEMP1,FAS,FN1,FOS,G6PC,GADD45A,GJA1,GNAS,ICAM1,IL13,IL18,ITGB8,JUND,KITLG,MAOB,MAPT,MEF2C,MMP1,MMP9,NOS2,NPPA,NRP1,PCK1,PECAM1,PPARGC1A,PTEN,PTGES,SGK1,SHC1,SIGIRR,SOD1,SOD2,TIMP1,TIMP2,TP53,TRPV1,VCAM1,VDR,VEGFA,VEGFC,WIF1,ZFP36                                                                                             |
| MITF        | 0,214  | transcription regulator         | 1,703  | 1,775  | 0,009  | 4,27E-09 | 1,13E-07 | ACO2,ACP5,ACSL1,APOE,APOLD1,ATP6V1B2,BEST1,CAPN3,CCNB1,CD151,CD44,CDC25B,CENPM,CEP55,CLCN7,COL1A1,CTSK,ECT2,ESPL1,FANCG,FN1,FOS,GM2A,GNPTAB,GPM6B,GPNMB,GPR137B,GZMB,HIF1A,HPGD,HPGDS,IL6R,INPP4B,ITGA3,KCNN2,KIF20A,MCM2,MCM5,MCM6,MET,MGAT4B,MGP,NDST2,ORC6,POLE2,POLM,PRF1,QDPR,RAB27A,RMI1,RPA3,SDC1,SERPINF1,SHTN1,SLC19A2,SLC7A8,SNW1,SOX13,SPAG5,ST3GAL6,STXBP1,TACC3,TBC1D16,TBX2,TDRD7,TERT,TMC6,TP53,TPX2,TXNIP,UBE2C,UBL3,UIMC1 |
| TAZ         |        | enzyme                          | 0,876  | 0,872  | -0,001 | 4,51E-09 | 1,18E-07 | ADAMTS1,ADRB2,ANXA1,AOX1,ARHGAP29,ARNT2,AXL,BASP1,C7,CAMK2N1,CAV1,CAV2,CD44,COL1A1,COL5A1,COL5A2,CYP1B1,DICER1,DUSP1,ENPP2,ESM1,F2RL1,FN1,HIF1A,IDH1,IFI16,LCP1,LUM,MET,MYOF,NOS2,PGM1,PKM,PLK2,S1PR1,SORBS2,TFPI2,TPI1,VEGFA,VLDLR                                                                                                                                                                                                        |
| POR         | -0,443 | enzyme                          | -1,238 | -1,256 | -0,004 | 4,83E-09 | 1,26E-07 | ABCC3,ACADL,ACADVL,ACSL1,ACTG1,AHR,ANXA5,APOA4,ASNS,CD36,CD74,CLDN3,CPA3,CPT2,CYP17A1,CYP2A6 (includes others),CYP2B6,CYP2C8,CYP4A11,DHCR7,ECI1,EHHADH,ELOVL6,ENTPD5,FABP2,FGF1,GADD45B,GBP2,GPHN,GSTA3,HIF1A,HLA-A,HLA-DMA,HLA-DQA1,HLA-DQB1,HSD17B10,HSD17B11,IDI1,IHH,LGALS1,LGALS1,MSMO1,NOCT,NR0B2,NSDHL,PKK4,PFKFB3,PLA2G7,PMVK,POR,PRNP,RETSAT,SC5D,SCD,SERPINA3,SLC22A5,STAT1,TM7SF2,UBD,VEGFA                                     |

|          |        |                                 |           |        |        |        |          |          |                                                                                                                                                                                                                                                                                                                                                                                                                                                                                                                            |
|----------|--------|---------------------------------|-----------|--------|--------|--------|----------|----------|----------------------------------------------------------------------------------------------------------------------------------------------------------------------------------------------------------------------------------------------------------------------------------------------------------------------------------------------------------------------------------------------------------------------------------------------------------------------------------------------------------------------------|
| LGALS3   | 0,209  | other                           |           | 0,663  | 0,673  | 0,002  | 5,90E-09 | 1,53E-07 | ABCC1,BAX,CASP3,CCNB2,CCND1,CCR2,CDKN1B,CLEC2B,COL3A1,COL4A1,COL5A2,CTSF,CTSV,DDOST,ENPP2,FN1,FSCN1,GPT,I CAM1,IL13,ITGAM,ITGAV,ITPR3,KRAS,KRT19,LMNB1,MAP3K10,MUC1,NOS2,PLEK2,PNPLA2,PPARGC1A,PRKCZ,PRSS3,PTEN,RAC1, RB1,TCF4,VCAM1                                                                                                                                                                                                                                                                                       |
| CD2      | 1,234  | transmembrane receptor          | Activated | 3,429  | 3,464  | 0,008  | 6,62E-09 | 1,72E-07 | CCNA2,CCNB1,CCND1,CCR7,CD40,CD44,CD48,CD58,CD86,CD8A, FAS,HLA-DMA,HLA-DPA1,ICAM1,IL13,ITGAL,PTEN,PTPRC,RB1,SELL,STAT1,STAT4,TP53                                                                                                                                                                                                                                                                                                                                                                                           |
| Nr1h     |        | group                           | Inhibited | -2,302 | -2,325 | -0,003 | 6,77E-09 | 1,75E-07 | ABCG1,ACACA,ACACB,ACADL,ACE,AGPAT1,ANGPTL3,APOC1,APOE,AQP3,ARG2,ARNT2,C2,C3,CAV1,CCL5,CCND2,CCR2,CCR5,CCR7,CD40,CPT2,CXCL1,CXCL10,ELOVL6,FGF1,G6PC,HCK,HLA-DOA,HLA-DOB,IFIH1,IL15,ITGAL,LTB,MARCKSL1,MLXIPL,MYLIP,NOS2,PLTP, PPARGC1A,PRKCQ,PTGES,RGN,RUNX3,SCD,SELP,SFRP1,SP110                                                                                                                                                                                                                                           |
| Tgf beta |        | group                           |           | 0,360  | 0,397  | 0,004  | 7,28E-09 | 1,88E-07 | .TAP1.THY1.TLR4.TP53.VLDLR<br>ADGRE5,ANKH,BASP1,BHLHE40,CASP1,CASP8,CCL5,CCND1,CCND2,CCR2,CCR7,CDH11,CDKN1B,CLU,COL1A1,COL1A2,COL4A1, COL4A2,COL5A1,CSF1R,CTF1,CTSK,CX3CR1,CXCL10,CXCR4,DA B2,DCN,ENG,FN1,FOS,FSCN1,FSTL1,GADD45B,GCLC,GZMB,HTA TIP2,ID1,ID3,IDO1,IGFBP4,IL13,IL32,INPP5D,ITGA2,ITGAV,ITGB3, JAK1,MAF,MET,MIF,MMP1,MMP2,MMP7,MMP9,MUC1,NEDD9,NOS2, NOX4,POSTN,PPARGC1A,PROM1,PTEN,RHOB,RORA,RORC,RUN X3,SDC1,SGK1,SMAD2,SMAD7,SMTN,SPARC,SPP1,SSBP3,TERT, TGFBI,TIMP1,TIMP2,TLR2,TNFRSF11B,VCAM1,VEGFA,VIM |
| CD40     | 0,351  | transmembrane receptor          | Activated | 3,293  | 3,340  | 0,007  | 7,45E-09 | 1,91E-07 | APOBEC3G,BAX,BCL2A1,BCL6,BIRC3,CALR,CCL18,CCL5,CCNA2, CCND1,CCND2,CCND3,CD27,CD38,CD40,CD44,CD69,CD83,CD86, CD8A,CDKN1B,CUL1,CXCL10,CXCL12,DUSP1,F3,FAS,FCGR2B,FO S,HLA-DQB1,HSP90B1,HSPA5,ICAM1,IL10RA,IL13RA1,IL15,IL15RA,IL18,IL 2RB,IL4R,IL6R,IRF1,ITGAL,ITGAM,ITGB2,JCHAIN,KLF9,MET,MMP9, NFKB1,NOS2,POU2AF1,PSMB10,PSMB9,SAMSN1,SELL,SMAD7,TA P1,TAP2,TAPBP,TLR2,TNFRSF11B,TNFSF10,TP53,TRAF5,TXLNA, VCAM1,VEGFA,XBP1                                                                                                |
| SPP1     | 0,481  | cytokine                        |           | 1,508  | 1,554  | 0,006  | 7,70E-09 | 1,96E-07 | ABCG2,AURKA,BAX,CA2,CASP8,CCL18,CCL20,CCL5,CCR2,CCS,CD163,CD44,CD9,COL1A1,CXCL1,CXCL12,CXCL6,CXorf21,DHCR7,EGF, FN1,FOS,GCDH,GSTZ1,HMOX2,HTATIP2,ICAM1,ITGA2,ITGA3,ITGAV,ITGB3,MECR,MMP1,MMP2,MMP7,MMP9,NDUFS4,NDUFS7,NDUFS8,NDUFV1,NOS2,PLOD1,POR,RB1,S100A4,S100A6,SAMM50, SC5D,SEMA6C,SERPINF1,SPP1,TERT,TGFBR2,TIMP1,TM7SF2,TP53, TXNRD2,UQCRC2,VEGFA,VIM                                                                                                                                                              |
| IRF4     |        | transcription regulator         | Inhibited | -3,423 | -3,450 | -0,004 | 8,40E-09 | 2,13E-07 | ADA,ALPL,B2M,BCL6,BNIP3,CCL20,CCNB1,CDK1,CTSS,CX3CR1,CXCL10,CXCL11,CXCL9,CXCR4,DDIT3,DNASE2,ELL2,ERBB3,GBP1, HSPA8,IL13,IL15RA,IL1R1,IL33,IL7R,INPP5D,IRF1,IRF7,IRF9,ISG15,ITGAL,MANF,MS4A1,OAS1,PCNA,PHF11,PLSCR1,PPIB,PRKCA,PRKCQ,PROCR,RAC1,RHOA,RHOB,RORA,RORC,SMARCA4,SPP1,STAT1,SUB1,TNFSF10,TRIM21,XBP1,YWHAH                                                                                                                                                                                                       |
| ID2      | -0,560 | transcription regulator         |           | 0,880  | 0,878  | -0,000 | 8,44E-09 | 2,14E-07 | ADM,BCL6,BMP7,CCL5,CCNB1,CCND1,CCND2,CCNG1,CCR5,CCR7,CD44,CD83,CDC25B,CDK1,CDKN2C,CSF2RB,CXCR4,DUSP1,DUSP22,FCER1G,FGFR3,FO XO1,GADD45B,GADD45G,HIF1A,ICAM1,IFI16,IFNGR1,IFNGR2,IGFBP4,IL10RA,IL2RB,IL4R,IL6R,IL7R,IRF8,ITGB3,LEPR,LGALS1,LTB,MAF,MMP2,MYB,NR4A1,NR4A3,NTRK2,PIK3C2B,PIK3IP1,RORA,SDC1,SELL,SH2D1A,SMAD7,SOX13,SOX4,STAT4,TCF4,TGFBR3,TNFSF10,TRAF5,TUBA1A,VCAM1                                                                                                                                           |
| INSIG1   | -0,258 | other                           |           | -1,762 | -1,821 | -0,010 | 8,86E-09 | 2,24E-07 | ABCG1,ACACA,ACACB,ALOX5AP,APOE,CCL5,CCR5,CCR7,CLEC7A,CXCL10,CXCL6,CXCR4,CYP4F2,DHCR7,ELOVL6,HLA-DQA1,HMGCS2,IDI1,IRF8,LCN2,LIPA,LPIN1,MLXIPL,MRC1,PCYT2, PLA2G7,PLD1,PLIN2,PMVK,PRF1,PTGES,PTGS1,RAB27A,S100A8, S100A9,SCD,SLC2A2,STAT4,TM7SF2,UCP2                                                                                                                                                                                                                                                                        |
| inosine  |        | chemical - endogenous mammalian | Activated | 4,101  | 4,139  | 0,008  | 8,91E-09 | 2,24E-07 | A2M,ANXA1,ANXA2,ANXA5,ARPC1B,C1QA,C1QB,C1S,C2,C3,CD63,CFB,CFD,DPP4,EMP3,FTL,IRF1,LCP1,LGALS3BP,RNASET2,SERPINB1,SERPING1,TIMP1,TSPO,TUBA1A,VIM                                                                                                                                                                                                                                                                                                                                                                             |
| TLR3     | 0,626  | transmembrane receptor          | Activated | 4,318  | 4,384  | 0,009  | 9,37E-09 | 2,35E-07 | AIM2,ARG2,ATF3,C3,CAST,CCL20,CCL5,CD38,CD40,CD69,CD86,C FB,CLU,CTH,CTSK,CXCL10,CXCL11,DDX58,DEFB1,DNMT1,DUSP1, FAS,FOS,GADD45B,GBP2,GCH1,ICAM1,ID1,IFI16,IFI44,IFI6,IFIH1,IFIT2,IFIT3,IFNA10,IL13,IL15,IL33,IL36A,IRF1,IRF7,ISG15,ISG20,LCN2,LIPA,LMNB1,MMP1,MX1,MX2,MYD88,NFKB1,NMI,NOS2,NR4A1,OAS1,PECAM1,PFKFB3,PIK3R3,PLK2,PROCR,PTGES,RHOB, RSAD2,S100A8,SERPINB9,SLPI,SPRY1,STAT1,TIMP1,TLR3,TLR4, TLR7,TNC,TNFRSF1B,TNFSF10,TRIM38                                                                                  |



|        |        |                         |           |        |        |        |          |          |                                                                                                                                                                                                                                                                                                                                                                                                                                                                                                                         |
|--------|--------|-------------------------|-----------|--------|--------|--------|----------|----------|-------------------------------------------------------------------------------------------------------------------------------------------------------------------------------------------------------------------------------------------------------------------------------------------------------------------------------------------------------------------------------------------------------------------------------------------------------------------------------------------------------------------------|
| Rxr    |        | group                   |           | 0,468  | 0,475  | 0,002  | 9,95E-09 | 2,48E-07 | ABCC2,ADAM10,APOE,AQP3,BMP7,C1QA,CD36,CEBPE,CRABP1,CSHL1,CTSB,CTSS,CYP2B6,CYP2C8,CYP3A4,CYP4F2,DIO1,EMX1,GADD45A,GAS2,GSTA1,HNF1B,HR,INSR,ITGB2,KNG1,LTF,MGP,MP1,MMP2,NOS2,NR0B2,NR1H3,PCK1,PKK4,PLIN2,PLTP,POR,RXRA,SEMA4D,SERPINF1,SPP1.TERT                                                                                                                                                                                                                                                                          |
| RICTOR |        | other                   | Activated | 2,420  | 2,359  | -0,007 | 1,10E-08 | 2,74E-07 | ATP5F1D,ATP5MC2,ATP6V0D1,ATP6V0E2,ATP6V1B1,ATP6V1B2,ATP6V1D,ATP6V1E1,ATP6V1G2,BAX,CD69,COX11,COX15,COX6A2,COX7B,COX8A,CYC1,FAU,G6PC,HIF1A,IFI16,IFIT2,IL7R,ISG15,LEPRL,LHPP,NAT8,NDUFA10,NDUFA2,NDUFA3,NDUFA7,NDUFAB1,NDUFB7,NDUFC1,NDUFS1,NDUFS2,NDUFS3,NDUFS4,NDUFS7,NDUFS8,NDUFV1,OAS2,PHF11,PPA2,PRKCA,PSMA4,PSMA6,PSMB10,PSMB5,PSMB6,PSMB7,PSMB8,PSMB9,PSMD1,PSME1,PTEN,RAC1,RORC,RPL13A,RPL14,RPL23,RPL28,RPL35A,RPL8,RPLP2,RPS19,RPS21,RPS24,RPS3,SDHB,SDHD,SEM1,SGK1,SLC10A2,TCIRG1,UQCRC1,UQCRC2,VCAM1         |
| PDX1   |        | transcription regulator |           | 1,106  | 1,123  | 0,002  | 1,13E-08 | 2,79E-07 | ACE2,ACTB,ACTG1,AKR1B1,AKR7A2,ALB,ALDOB,ANXA2,ASNS,ATF3,CAMK2N1,CAT,CCND1,CD44,COL1A1,COL3A1,CPT2,CRELD2,CXCR4,DNAJC10,ECH1,F3,FGF1,FGF11,FGF19,G6PC,GCH1,GCLM,GNAS,GO T1,GRN,HK1,HNF4A,HSPA5,ID1,ID2,ID3,IDH1,LRRC49,LXN,MAOB,MAPT,NFKB1,PC,PCNA,PDI4,PDI6,PDZK1IP1,PHGDH,PNPO,PTGER3,PTP4A1,PTPRF,RSAD2,SLC2A2,SPP1,SSBP3,SST,TGFBF3,TRIB3,TSPAN8,TXNIP                                                                                                                                                               |
| CFTR   | 0,201  | ion channel             | Inhibited | -3,461 | -3,465 | -0,001 | 1,17E-08 | 2,88E-07 | ACAA1,ACAA2,AQP1,ASNS,BLNK,CA4,CAPG,CCL5,CFH,CPA3,CUBN,CYP2B6,CYP4A11,EPHX2,FAAH,FABP2,FAS,GSR,HADH,HPGD,HSD17B11,IDI1,MYL7,NFKB1,NOS2,OSBP1A,POR,S100A8,SCD,SCP2,SLC27A2,SLC37A4,SLC7A8,SLC9A3,STAT1                                                                                                                                                                                                                                                                                                                   |
| IL18   | 0,440  | cytokine                | Activated | 3,526  | 3,576  | 0,007  | 1,30E-08 | 3,18E-07 | ADA2,AQP3,ATF3,BCL6,CCL20,CCL5,CCR5,CCR7,CD40,CD44,CD69,CD83,CD86,CTH,CXCL10,CXCL11,CXCL12,CXCL9,ENPP2,FAS,FCGR3A/FCGR3B,GADD45B,GADD45G,GIMAP4,GJA1,GZMB,GZMH,ICAM1,IDO1,IL13,IL18,IL32,INPP5D,IRF1,ITGAL,ITGAM,MMP1,MMP9,MSH2,NFIL3,NKG7,NOS2,NPPA,PRF1,PTEN,SAMHD1,SELL,SERPINB1,SET,SMAD2,SOCS2,SPP1,TGFBF2,TIMP1,TLR4,TNFRSF11B,VAMP2,VCAM1,VEGFA                                                                                                                                                                  |
| PTP4A1 | -0,365 | phosphatase             |           | 1,058  | 1,074  | 0,002  | 1,36E-08 | 3,29E-07 | ACTN1,ACTR2,ACTR3,AHCY,ANXA5,BAX,CCL5,COL15A1,COL5A1,DNAJB1,EIF6,FLNA,FLRT1,GSTP1,HIF1A,HNF4A,HNRNPA3,HNRNPF,IFI16,IGFBP7,IMPDH2,ITGB8,MAP3K1,MAPK10,MAPK8,MMP2,NCK1,NME1,PCNA,PECAM1,PKM,PPP1R12A,PRDX2,ROCK1,SHC3,SLC35G2,SPARC,SPINT2,STMN1,TAGLN2,TKT,TP53,VCAN,VIM                                                                                                                                                                                                                                                 |
| IL21   |        | cytokine                | Activated | 3,507  | 3,555  | 0,007  | 1,39E-08 | 3,35E-07 | ARG2,BCL6,CASP1,CASP3,CCL20,CCL5,CCND2,CCR7,CD1D,CD2,CD27,CD38,CD69,CD86,CDKN1B,CLIC5,CXCL10,DPP4,FCER1G,FCGR2B,FGL2,GZMA,GZMB,HERC6,HIF1A,IDO1,IFI16,IFIT2,IFIT3,IL13,IL2RB,IL7R,IRF7,ISG15,KLRB1,KLRD1,MMP2,MMP9,MYD88,NOS2,OAS2,PCNA,PRF1,PSMB9,PTPRC,RORA,RORC,RSAD2,SELL,SGK1,SOCS2,STAT3,STAT4,TAP1,TLR4,TYROBP,XBP1                                                                                                                                                                                              |
| Ins1   |        | other                   |           | -0,747 | -0,714 | 0,004  | 1,40E-08 | 3,37E-07 | ACACA,ACADM,ACTB,ADIPOR1,ALAD,ALB,APOA1,APOC3,BCKDHA,CCL5,CCND1,CCND3,CDKN1B,CFD,CKM,COL18A1,COL1A1,CRA T,CSHL1,CYB5A,DDIT3,DYNLL1,ECI1,ECI2,EHHADH,ELOVL6,FOS,G6PC,GPD1,GSTP1,HSD11B2,IGFBP4,IMPDH2,INSR,IVD,LGALS3BP,MAPT,MIF,MLXIPL,MMP1,MMP2,MTTP,NDUFS4,NGF,NOS2,NPPA,NR1H3,OXT,PCK1,PCNA,PER1,PIKFYVE,PKLR,PLIN2,PPARA,PPIB,PRKCA,PRKCC,PRLR,PTEN,RETSAT,RGN,RHOA,RRM1,RRM2,RXRA,SCD,SDHB,SLC28A1,SLC2A2,SLC37A4,SOCS2,SOD2,SP3,SPARC,STAT3,STX4,THY1,TIMP1,TIMP2,TTF2,UBE2D2,UQCRC1,UQCRC2,VAMP2,VAMP5,VEGFA,VIM |
| DCN    | 0,741  | other                   |           | -0,598 | -0,603 | -0,001 | 1,49E-08 | 3,55E-07 | BAX,CASP3,CASP8,CDKN1B,CDKN1C,CKM,COL1A2,CXCL10,DUSP1,ENG,FBN1,HIF1A,HLA-DQA1,HLA-DQB1,ICAM1,ITGAV,MET,MMP1,MMP2,MMP9,NOS2,S1PR1,SDC1,TP53,VCAM1,VEGFA                                                                                                                                                                                                                                                                                                                                                                  |
| IRF5   |        | transcription regulator | Activated | 4,382  | 4,425  | 0,008  | 1,51E-08 | 3,59E-07 | BAX,BID,CASP3,CCL19,CCL21,CCL5,COL1A1,COL3A1,COL4A1,CXCL10,CXCL11,CXCR4,DAPK2,DDX58,FOXO1,IFI44,IFIH1,IFIT2,IFIT3,IRF7,ISG15,ISG20,NAMPT,OAS1,OAS2,PARP12,PLSCR1,RSAD2,SP110,STAT1,TNFSF10,UBE2L6,VEGFA,YWHAE                                                                                                                                                                                                                                                                                                           |
| SOX4   | 0,823  | transcription regulator | Activated | 3,570  | 3,617  | 0,006  | 1,52E-08 | 3,62E-07 | ADGRE5,ALDH1B1,APBB1,BAX,CAPN2,CASP1,CCN3,CD1D,CD2,C D53,CD74,DICER1,ENPEP,EVI2A,EVL,EZH2,FCER1G,FGF13,FHL1, FN1,FOS,GCAT,GGA2,GLDC,GPR171,GPR183,H1-10,HLA-DQB1,IFI30,IGFBP4,IGKC,KDM7A,KYNU,LCK,LHFPL6,LYZ,MAGED1,MAP7,MARCKSL1,MGST2,NRXN2,NUAK1,PECAM1,PNP,PPIC,PYGL,RARRES1,SDR39U1,SEL1L3,SELL,SERPINE2,SMAD1,SNN,SNX1                                                                                                                                                                                            |
| S100A9 | 0,976  | other                   | Activated | 2,860  | 2,884  | 0,003  | 1,57E-08 | 3,73E-07 | 0.ST6GAL1,TES,TIAM1,TUBA1A,UCLH1,VIM A2M,ABCG1,ADAMTS1,AKAP12,ALPL,ATF3,BACE1,BHLHE40,C1QB,C1S,C3,CASP1,CCND1,CD27,CD69,CDH3,CORO1A,COX6A2,CSF2RB,CXCL10,CXCL14,DDC,ENPP2,FAS,FOSL1,GZMB,ICAM1,IL33,ISG15,ITGAM,KLF15,LOC102724788/PRODH,MCF2L,MMP1,MMP2,MMP9,NOS2,NR4A3,PCDHGB5,PER1,PIK3IP1,POSTN,PTGES,RNA SE6,S100A8,S100A9,SEMA3B,SGK1,SHC3,SLC26A1,SOCS7,TNFAIP8,TXNIP,VCAM1,VCAN,WT1                                                                                                                             |

|              |        |                                   |           |        |        |        |          |          |                                                                                                                                                                                                                                                                                                                                                                                             |
|--------------|--------|-----------------------------------|-----------|--------|--------|--------|----------|----------|---------------------------------------------------------------------------------------------------------------------------------------------------------------------------------------------------------------------------------------------------------------------------------------------------------------------------------------------------------------------------------------------|
| SYVN1        |        | transporter                       |           | 1,262  | 1,326  | 0,009  | 1,74E-08 | 4,09E-07 | ABCC3,ADAM9,ADCY9,AHR,AXL,BHLHE40,CALM1 (includes others),CAVIN1,CCND1,CD151,CD44,CDA,CRTAP,CTPS1,CYP1B1,DAB2,DUSP1,EXT2,F3,FANCG,FAS,FOLR1,GGCX,GNB2,HLA-A,HLA-C,HNRNPM,IFI44,IFITM2,IL7R,ITGA3,ITGAV,LGALS3BP,MCAM,MGRN1,MYOF,NFE2L2,PFN1,PNPLA2,RPN2,SETX,SLC12A3,SLC1A5,SLC27A3,SLC3A2,SLC43A3,TARS1,USP5                                                                               |
| S100A8       | 2,072  | other                             | Activated | 2,501  | 2,519  | 0,002  | 1,75E-08 | 4,11E-07 | A2M,ABCG1,ADAMTS1,AKAP12,ALPL,ARG2,ATF3,BHLHE40,BIRC2,C1QB,C1S,CASP1,CCL20,CCND1,CD69,CDH3,CORO1A,COX6A2,CSF2RB,CXCL10,CXCL14,CXCL9,DDC,ENPP2,FAS,FOSL1,GZMB,ICAM1,IDO1,IL33,ISG15,ITGAM,KLF15,LOC102724788/PRODH,MCF2L,MMP1,MMP2,MMP9,NFKB1,NOS2,NR4A3,PCDHGB5,PER1,PIK3IP1,POSTN,PTGES,RNASE6,S100A8,SEMA3B,SGK1,SHC3,SLC26A1,SOC57,TNFAIP8,TXNIP,VCAM1,VCAN,WT1                          |
| COL18A1      | 0,396  | other                             | Inhibited | -2,276 | -2,322 | -0,008 | 1,86E-08 | 4,35E-07 | CCND1,CDC25B,CDH5,CDKN2C,EFNB2,F11,F12,F2RL1,F3,FN1,FOS,HIF1A,ICAM1,ID1,ID3,IL18,ITGAV,ITGB2,ITGB3,KNG1,MAPK8,MM1,MMP2,MX1,NOS2,NRP1,PDCC5,PECAM1,SELP,SP3,STAT1,STAT3,TNFRSF21,TUBA1A,VEGFA,VWF                                                                                                                                                                                            |
| ETV5         | -0,165 | transcription regulator           |           | 1,486  | 1,496  | 0,002  | 2,14E-08 | 4,99E-07 | AGRN,AHNAK,BAX,CAV1,CAVIN1,CCND1,CLDN1,CLDN3,CLIC5,CXCL12,CXCR4,DPYSL2,FN1,FXD5,HOPX,ICAM1,ICAM2,KRT19,KRT7,LAMP3,LCN2,LYZ,MAF,MET,MMP2,MSN,MYB,PKP2,PMP22,RAB27A,S100A6,SAMHD1,SCD,SLC34A2,SOAT1,SPP1,TJP1,VEGFA                                                                                                                                                                           |
| folic acid   |        | chemical - endogenous mammalian   |           | 1,521  | 1,522  | 0,000  | 2,17E-08 | 5,05E-07 | ABCC1,ABCG2,CCL5,CLU,COL1A1,COL3A1,CSNK1A1,CYBB,DDIT3,DNMT1,FABP1,FN1,FZD6,HDAC6,HOXA1,IFI27,IFI6,MMP2,MMP9,MYD88,NOS2,NOX4,PCNA,PECAM1,PLG,PTH1R,SFRP1,TP53,VCAM1                                                                                                                                                                                                                          |
| MKNK1        | 0,043  | kinase                            |           | 0,805  | 0,867  | 0,010  | 2,24E-08 | 5,21E-07 | ACOT7,AGRN,ANXA2,ANXA5,ATP1A3,BAG3,BMP8B,CAMK2A,CRM1,EPB41L2,FAM49A,FLNA,FOS,FOSB,GNAI1,GPC4,GPS1,HADHA,HSPA4L,IFIT2,IFRD1,ISG15,KLC1,LAMC1,LCN2,MAPT,NR4A3,PLTP,RAB3A,SFRP1,SMAD2,SPARC,STXB1,TMBIM6,TP53BP1,TRIM32,TXNIP,VAMP2,VIM                                                                                                                                                        |
| TERT         | -0,188 | enzyme                            |           | 0,116  | 0,122  | 0,002  | 2,27E-08 | 5,26E-07 | ALDH1A3,ASAP1,ASNS,ATF3,B2M,BAX,BNIP3,CALU,CAV1,CCND1,CD24,COL5A2,EFEMP1,ELK3,FUT4,GLB1,HDHD5,HLA-B,HOXB6,HTRA1,ICAM1,IFI16,IFIT2,IGFBP4,IL13RA1,IQGAP2,ISG15,ITGAV,KRT19,MMP1,MMP2,MMP9,MX1,PLOD2,PLTP,PROM1,PTGS1,RB1,RRM2,SASH1,SOD2,SPON1,SPP1,TACC3,TERT,TP53,VIM,XBP1                                                                                                                 |
| FOXM1        | 0,191  | transcription regulator           | Activated | 2,732  | 2,787  | 0,009  | 2,33E-08 | 5,39E-07 | ACE,ACE2,ADAM17,ANXA1,CAT,CAV1,CCNA2,CCNB1,CCNB2,CCND1,CCND2,CDC25B,CDK1,CDKN1B,CDKN3,CXCL12,ESR1,FOS,FUT4,GLB1,HSD11B2,KIF20A,MAPK8,MET,MMP2,MMP7,MMP9,NFKB1,PCNA,PECAM1,PRC1,PRDX2,PROM1,PTTG1,RMI1,SFRP1,SOD2,STAT3,STMN1,TGFB2,TJP1,TP53,VCAN,VEGFA,VIM,ZEB2                                                                                                                            |
| L-methionine |        | chemical - endogenous mammalian   |           | 1,044  | 1,039  | -0,002 | 2,44E-08 | 5,62E-07 | ALB,CCNB1,CCNB2,CDK1,CDKN2C,CLU,DDIT3,F3,FANCL,G6PC,GADD45B,GNA11,HSPA5,IFI16,IGFBP4,MAT2A,MTTP,PCK1,PCK2,PRC1,RHOB,SMAD7,SOD2,SPHK2,SPP1,TP53                                                                                                                                                                                                                                              |
| Pkc(s)       |        | group                             |           | 0,198  | 0,236  | 0,006  | 2,45E-08 | 5,63E-07 | ACAT1,ACO1,ADM,AHR,APOA1,AQP3,ARG2,ATF3,CCND3,CCR2,CCR5,CD36,CD55,CDKN1B,CDX2,CGA,CLDN1,COL3A1,CTS1,CXCR4,CYBB,CYP2A6 (includes others),DDIT3,DUSP1,F3,FAS,FN1,FOS,FOSL1,GADD45A,GADD45B,GPER1,HIF1A,HSP90B1,HSPA5,ID2,KCNJ2,LHB,LIPA,MAOB,MMP1,MMP2,MMP9,MS4A1,NFKB1,NOS2,NOX4,NR4A1,NR4A3,OVOL1,P4HB,PDIA4,PER1,PPARA,PPP1R15A,PRKCA,PTPRE,RB1,S100A8,SPP1,STC2,TAC1,VCAM1,VDR,VEGFA,XBP1 |
| RETNLB       |        | other                             | Activated | 3,274  | 3,327  | 0,009  | 2,82E-08 | 6,46E-07 | CASP3,CCL5,CCR2,CCR5,CD86,COL1A1,COL1A2,FABP1,FN1,FRZB,FZD6,IL13,IL13RA1,IL4R,JAK1,KLF15,LMNB1,MID1,MMP2,MSN,NDN,NR4A1,PTEN,SFRP1,SMAD1,SOC52,STK17B,TERT,THBS4,TIMP1,TLR2,TNCC1,UBE2C                                                                                                                                                                                                      |
| NR1H2        |        | ligand-dependent nuclear receptor |           | 0,472  | 0,488  | 0,002  | 2,84E-08 | 6,49E-07 | ABCC2,ABCC3,ACOX1,AHCY,AHR,ALDH3A2,ANG,APOA4,ARAF,BHMT,CAT,CD36,CES2,CSHL1,CTH,CYP27A1,CYP2A6 (includes others),CYP2B6,CYP2C8,CYP3A4,CYP3A7,CYP4A11,DHCR7,ELOVL6,ENTPD5,FABP1,FMO5,GLUD1,GLUL,GOT1,GSTA1,GSTP1,HMGCS2,HNF4A,HSD3B2,LCN2,MGP,MTTP,MYB,NAT8,NAT8B,NR0B2,NR1R13,PDIA4,PGRMC2,PIPOX,POR,PPARA,S100A8,SCD,SLC22A7,STAT3,TCN2,TNFRSF11B                                           |
| ELAVL1       | -0,037 | other                             |           | 0,656  | 0,685  | 0,007  | 3,23E-08 | 7,31E-07 | ANXA11,ARAF,ARG2,ATF3,CALM1 (includes others),CCL8,CD83,CLDN1,CLDN3,DCN,DGAT1,DUSP1,EIF4ENIF1,FLNA,FOS,GSS,IL13,IRF1,NCL,NOS2,NXF1,PBK,PCGF2,PCOLCE,PIGR,PRC1,PROM1,QARS1,RACK1,RPN2,SLC25A11,SLC7A7,SRSF7,STAT3,TIA1,TJP1,TP53,TRIOBP,VEGFA,ZFP36                                                                                                                                          |

|                      |        |                                 |           |        |        |        |          |          |                                                                                                                                                                                                                                                                                                                                                                                                                                                                                                                                                                                                                                                                                                |
|----------------------|--------|---------------------------------|-----------|--------|--------|--------|----------|----------|------------------------------------------------------------------------------------------------------------------------------------------------------------------------------------------------------------------------------------------------------------------------------------------------------------------------------------------------------------------------------------------------------------------------------------------------------------------------------------------------------------------------------------------------------------------------------------------------------------------------------------------------------------------------------------------------|
| ursodeoxycholic acid |        | chemical - endogenous mammalian |           | 0,236  | 0,248  | 0,002  | 3,33E-08 | 7,52E-07 | ABCC2,ABCC3,ABCG2,BAX,CCL20,CDX2,COL1A1,COL1A2,COL4A1,CXCL10,CYP27A1,CYP2B6,CYP3A4,CYP4A11,DDIT3,GCLC,GCLM,GPT,MAF,NFKB1,NOS2,PRKCZ,SLC10A2,SLC5A2,SPARC,SPP1,TIMP1,TP53,VDR                                                                                                                                                                                                                                                                                                                                                                                                                                                                                                                   |
| MAP2K1               | 0,166  | kinase                          |           | 0,720  | 0,771  | 0,008  | 3,36E-08 | 7,58E-07 | ABCC1,ADGRG1,AHR,ALDH1L1,APOBEC3G,APOE,ATF3,BCL2A1,BIRC2,BIRC3,CAPN3,CCL5,CCNA2,CCND1,CD44,CDH5,CDKN1B,CKM,COL1A1,COL1A2,COL3A1,CSTA,CTSB,CYP17A1,CYP46A1,DA,B2,DNMT1,DPP4,DUSP1,ENO1,F3,FLNA,FOS,FOSL1,HIF1A,HSPA5,ITGB3,JUND,LHB,MAOB,MMP1,MMP2,MMP9,NET1,NOS2,NOX5,OLFM4,PCNA,PDGFRA,PECAM1,PLA2G4A,RAB38,RAP2B,RRM2,SERPINE2,SMAD2,TFPI2,TNC,TNFSF10,VEGFA,ZWINT                                                                                                                                                                                                                                                                                                                           |
| NFYA                 |        | transcription regulator         |           | -0,046 | -0,017 | 0,007  | 3,44E-08 | 7,73E-07 | ALB,CALR,CAT,CCNA2,CCNB1,CCNB2,CDC25B,CDK1,COL1A2,EPHX1,F12,G6PC,GADD45A,GADD45B,GUCY1B1,HLA-DQB1,HLA-DRA,HSPA5,ICAM1,IRF1,JUND,LPIN1,OGG1,PCK1,PKM,PPP1R15A,PTTG1,RHOB,RRM2,SCD,TGFBR2,TOP2A,TXNIP,UBE2I,VWF                                                                                                                                                                                                                                                                                                                                                                                                                                                                                  |
| EPO                  |        | cytokine                        |           | -1,531 | -1,499 | 0,005  | 3,82E-08 | 8,57E-07 | ACTB,ATP6V1B2,B2M,BAX,BCL6,BLVRB,BNIP3L,BZW2,CA2,CASP3,CCL19,CCND2,CCND3,CD36,CD52,CDKN1B,CISH,CLIC1,CTSK,CTS2,CUL1,CXCL12,CXCR4,DDIT3,FABP1,FAS,FOS,FOSB,FPR1,G6PC,GCC2,GLUL,GYPA,HBB,HLA-DRB1,HNRNPF,IL18,KCNH6,KPNB1,LAPTM5,LCP1,MACROH2A1,MAA2,MMP2,MYB,NAB2,OSBPL1A,PCNA,PDCD4,PDLIM2,PIK3IP1,PRDM14,PRKCA,PRKCD,PRKCQ,PRKCZ,RHOA,RNF128,ROCK1,SAMSN1,SELP,SLC4A1,SOCS2,SOD1,SPP1,SSRP1,ST3GAL4,STAT3,TJP1,TLR4,TNFRSF11B,TNFSF10,TP53,TPI1,TXNIP,UCP2,UCCG,VEGFA,VFGFC,VWF,WDR1,XPC                                                                                                                                                                                                      |
| Histone h3           |        | group                           | Inhibited | -2,643 | -2,621 | 0,008  | 3,88E-08 | 8,67E-07 | ACKR3,ADAM10,ADD3,AFP,AKAP12,ARHGEF17,ARR3,ATF7IP,B2M,CA4,CAV1,CCL5,CCNA2,CCNB1,CCND1,CCND2,CD1D,CD40,CD69,CD9,CDK14,CDKN1B,CDKN2C,CDX2,CGA,CHFR,CKAP4,CLPS,COL1A2,CRIP2,CSF1R,CSHL1,CXCL10,DIO1,ENO3,ESR1,EVX1,FAM49A,FKBP5,FOS,GAD1,GAS2,GHR,HNF4A,HOXA10,HOXB1,HOXB5,HOXB6,HPSE,ICAM1,ID1,ID2,IFI6,IGFBP4,IL13,IL6R,INHA,IRF7,KAT5,KIAA0895,MAD2L1,MCM2,MCM3,MCM5,MEIS2,MET,MMP9,MT1G,MX1,NDUFA7,NDUFB7,NDUFC1,NDUFS1,NDUFS2,NDUFS3,NDUFS4,NDUFV1,NOS2,OPA1,OSGIN1,PALLD,PCNA,PKLR,PRLR,PTEN,PTGES,RAB38,RB1,RCAN1,RGS10,RSAD2,S100A8,S100A9,SCD,SCE31A,SFRP1,SGK1,SLC2A2,SOD2,SPP1,TACC2,TBX2,TERT,TGFB2,TLR2,TMPRSS2,TNFSF10,TOP2A,TYRO3,UQCRC1,UQCRC2,UISP3,VEGFA,WDR1,WNT8R,XRP1,ZNF423 |
| TYROBP               | 2,117  | transmembrane receptor          | Activated | 3,051  | 3,073  | 0,006  | 4,13E-08 | 9,20E-07 | CCR7,CD40,CD69,CD83,CD84,CD86,FCGR2B,ICAM1,IDO1,IL10RA,IL13RA1,IL18,IRF8,ITGAM,KLRD1,LHFPL2,NCF2,NCKAP1L,NOD2,PLEK,SAMSN1,SH2B3,SLC1A5,SPP1,TCIRG1,TNFRSF1B,TREM2,TYROBP                                                                                                                                                                                                                                                                                                                                                                                                                                                                                                                       |
| DNMT3A               |        | enzyme                          |           | 1,521  | 1,512  | -0,001 | 4,28E-08 | 9,48E-07 | ACE,ACSL1,ADCY7,AKAP12,ATP2B4,BLNK,CAMK2A,CASP4,CASP6,CD38,CKM,CSF1R,CXCR4,CYBB,EFEMP1,EMX1,FCER1G,FOXO1,GPER1,GRINA,GSS,GUCY1A1,HOXA1,ITGAV,ITPR3,JCHAIN,MAPK13,MYL3,NR4A1,PIK3C2B,PLA2G7,PLCB4,PLK2,POU2AF1,PPP1R3C,PRKCI,PTGS1,PTPRC,RAP2B,RRAS2,S1PR1,SHC1,SLC12A8,S                                                                                                                                                                                                                                                                                                                                                                                                                       |
| Esrra                |        | transcription regulator         | Inhibited | -2,328 | -2,314 | 0,003  | 4,30E-08 | 9,48E-07 | LIT2,SPP1,ST14,TNNC1,TNNI1,TNNT2,TPCN1,TSC22D1                                                                                                                                                                                                                                                                                                                                                                                                                                                                                                                                                                                                                                                 |
| CST5                 |        | other                           | Inhibited | -3,396 | -3,438 | -0,005 | 4,50E-08 | 9,85E-07 | ACADL,ACADM,ACAT1,ACE2,ACO1,ACOX1,ACSL5,ALDOB,APOA4,COX6A2,COX8A,CPT2,CRAT,CYC1,DLAT,ECH1,ENO1,ENO3,ESRRA,FABP1,FABP2,FBP1,GOT1,GYS1,IHH,LEPR,NDUFA2,NDUFS3,PCK1,PCK2,PKD4,PFKL,PGAM2,PGM1,PPARGC1A,PYGL,SDHB,SIRT3,SPP1,UQCRC1                                                                                                                                                                                                                                                                                                                                                                                                                                                                |
| MYOD1                | -0,045 | transcription regulator         | Inhibited | -2,170 | -2,129 | 0,006  | 4,51E-08 | 9,85E-07 | ABCC1,AGO1,AHNAK,AKAP12,ANXA2,ANXA3,ANXA5,AP1M2,ARHGAP29,ATP2C2,ATR,BLOC1S1,CAMK2G,CAV1,CD44,CNOT8,COP7A,CORO1A,CTSB,CYBRD1,DECR1,DHX9,DNAJA3,EIF2B2,EIF5B,ELK3,EMP3,ESRRA,EVPL,FHL1,GAR1,GNL3,HNRNPA3,ID3,IGBP1,IQGAP2,ITPR3,KDM5B,LAMC1,MALT1,MAPK13,MEF2C,MRM3,MSN,NCL,NDUFB7,NOP10,NOP53,NRP1,NUP107,NUP155,PCLAF,PIP4K2A,PLS3,PPIC,PPL,PRDX2,PRKACB,PRSS8,PYGB,RAB25,RBM28,RBP1,RRP1,RTN3,S100A11,SGPL1,SLC1A3,SMAD2,SOX4,SSRP1,SUPV3L1,TESC,TXN,VCAN,VIM,VTI1B,WDR3,ZFC3H1                                                                                                                                                                                                               |
|                      |        |                                 |           |        |        |        |          |          | ACACA,ACACB,ACSL5,ADCY7,ASS1,BCL6,BIN1,CCND3,CDH15,CDKN1C,CDX2,CHRND,CKM,COL4A1,DAO,DUSP1,ENO3,ENPP2,ESR1,FOSL1,FSTL1,FYN,GADD45A,GADD45G,GMFG,GUCA2A,GYS1,HADH,HIPK3,HSPA4L,HSPB8,ID2,IFI16,ITGA7,LZTS3,MAFB,MEF2C,MMP2,PLEKHO1,PNP,POSTN,PPARGC1A,RB1,RBM38,RECK,RRAS,SCN4A,SGCA,SH3GLB1,SLC12A2,SMAD7,SST,STAM,TGFBR3,TJP1,TKT,TNNC1,TNNI1,TNNT2,TNS1                                                                                                                                                                                                                                                                                                                                       |

|                |        |                                 |           |        |        |        |          |          |                                                                                                                                                                                                                                                                                                                                                                                                                                                                                                                                              |
|----------------|--------|---------------------------------|-----------|--------|--------|--------|----------|----------|----------------------------------------------------------------------------------------------------------------------------------------------------------------------------------------------------------------------------------------------------------------------------------------------------------------------------------------------------------------------------------------------------------------------------------------------------------------------------------------------------------------------------------------------|
| BDNF           | 0,071  | growth factor                   |           | -1,918 | -1,887 | 0,004  | 4,86E-08 | 1,06E-06 | ACOT7,ADAM17,ADR2,AGRN,ALDH7A1,ANXA2,ANXA5,ARC,ATP1A3,ATP5MC2,BAG3,BCL2L2,BHLHE40,BID,BMP7,CAMK2A,CASP3,CAV2,CCND2,CD36,CDADC1,CRMP1,CXCR4,DNAJB5,DUSP1,ELOVL6,EPB41L2,FAM49A,FLNA,FOS,FOSB,FSCN1,FTL,GLUL,GNAI1,GPC4,GPS1,HADHA,HSPA4L,HSPA5,IFRD1,KLC1,LAMC1,LCN2,LGALS1,LYPD1,MACROD1,MAPT,MMP1,NAB2,NECAB3,NOS2,NR4A1,NR4A3,NTRK2,P4HA1,PCNA,PFKFB3,PLG,PLTP,PRKCZ,PTEN,RAB3A,RHOA,RPL35A,S100A10,S100A9,SFRP1,SLC16A7,SOD2,SPARC,SPP1,SPRY2,SST,STXBP1,TAC1,TIAM1,TIPARP,TMBIM6,TMEM45A,TNFRSF11B,TP53BP1,TRIM32,TUBA1A,TXNIP,VAMP2,VIM |
| KITLG          | 0,406  | growth factor                   |           | 1,772  | 1,821  | 0,008  | 5,30E-08 | 1,15E-06 | ACTB,ALOX5,ALOX5AP,ATP6V1B2,AXL,B2M,BLVRB,BZW2,CA2,CASP1,CASP3,CCNA2,CCND3,CD14,CD247,CD3D,CD3G,CDKN1B,CISH,CLIC1,CXCL12,CXCR4,EFNB2,FOS,GCC2,GJA1,HCK,HNRNPFL,IGHM,IK,IL13,IL18,IRF2,ITGAV,ITGB3,KPNB1,LAPTM5,LTF,MEF2C,MME,MMP2,MYB,NPPA,OGG1,OSBPL1A,PDCC4,PIK3IP1,PKM,PLSCR1,PRKCA,PRKCQ,PSMB5,RBBP7,RNF128,SAMSN1,SHC1,SLC4A1,ST3GAL4,STAT3,STK25,SYK,TCF12,TERT,TXNIP,UCP2,UGCG,WDR1,ZNF207                                                                                                                                            |
| IFNAR1         | 0,155  | transmembrane receptor          | Activated | 3,669  | 3,700  | 0,006  | 5,76E-08 | 1,24E-06 | ATF3,AXL,B2M,CCL20,CCL5,CD40,CLIC5,CXCL10,CXCL11,CXCL6,HLA-A,IDI1,IDO1,IFI16,IFI44,IFI6,IFIH1,IFIT2,IFIT3,IFITM1,IFNGR1,IL15,IL18,IRF7,ISG15,ITGAV,LAMP3,MX2,NOS2,OAS1,OAS2,OAS3,PARP12,PLA2G7,RIPOR2,RSAD2,RTP4,SDC1,SOD2,STAT1,TAPBPL,TLR2,TLR3,TLR7,TNFAIP2,TNFSF10,TRIM22,UBD,VCAM1,XAF1                                                                                                                                                                                                                                                 |
| PI3K (family)  |        | group                           |           | 1,905  | 1,935  | 0,005  | 5,82E-08 | 1,25E-06 | ABCG1,ADM,BIRC3,CAT,CCND3,CDKN1B,CDX2,CTSD,CXCL1,CXCL10,CXCL11,CXCL12,CXCL9,CXCR4,DDIT3,DEFB1,ESR1,FOS,FOXO1,FOXO4,GCLC,GCLM,HIF1A,HK1,HSPA5,ISG15,MMP2,MMP9,NFE2L2,NOS2,PKM,PRKCZ,PTEN,PTGS1,SOX4,TJP1,TNC,TNFSF10,TXNIP,VEGFA,WTAP                                                                                                                                                                                                                                                                                                         |
| HDAC1          | 0,381  | transcription regulator         |           | -0,540 | -0,550 | -0,002 | 6,25E-08 | 1,34E-06 | AKAP12,APOA1,ARC,ATF3,BAX,BCL6,CCL5,CCNA2,CCNB1,CCNB2,CCND1,CCND2,CD1D,CD27,CD44,CDK1,CDKN1B,COL1A1,COL1A2,CSF1R,CSHL1,CTSK,DUSP1,ESR1,FABP1,FABP2,FAS,FOS,GABARAPL1,GLUL,GNAS,GSTP1,IDI1,IL13,LAT,LCN2,MCM3,MCM5,MCMT7,MEF2C,MME,MMP9,MT1G,MYO1F,NASP,NCL,NKX2-5,NOS2,OLFM4,PCK1,PFKFB3,POLL,PPARGC1A,PTEN,PTPN6,RBP7,RECK,RGS10,RHOB,RORC,RRM2,S100A9,SFRP1,SGK1,SLC35D1,SMAD7,SPP1,ST5,STAT3,TBX2,TERT,TGFBR2,TNS1,TP53,VDR                                                                                                               |
| hydrocortisone |        | chemical - endogenous mammalian |           | -1,379 | -1,369 | 0,002  | 6,36E-08 | 1,36E-06 | ACO1,ADM,ALDH18A1,ALDH1L1,BACE1,BCLAF1,CCND1,CCND2,CCND3,CD163,CD40,CD86,CDH11,CDK1,CFD,CSHL1,CXCR4,CYP3A4,FAS,FGF7,FN1,GADD45B,GBP1,GLUL,GNAS,ICAM1,IGFBP4,IGFBP6,IGFBP7,ITGA2,ITGAM,LY75,NR113,NTRK2,PLA2G4A,PLG,PRLR,PTGS1,S100A8,SFRP1,STC2,TLE2,TLR2,TNFAIP2,TNFRSF11B,TP53,TUBB,VAMP2                                                                                                                                                                                                                                                  |
| CDKN2A         |        | transcription regulator         | Inhibited | -2,080 | -2,088 | -0,001 | 6,56E-08 | 1,40E-06 | A2M,BARD1,BAX,C3,CAPG,CASP3,CCL18,CCL19,CCL5,CCNA2,CCNB1,CCND1,CCND3,CCNG1,CCR7,CDC25B,CDK1,CDKN1B,CDKN2C,COL1A2,CUL1,CXCL10,CXCL14,CXCL6,DCK,DDR1,DEK,DUSP1,EED,EZH2,FAM111A,FANCL,FHL2,FOS,GADD45G,GLB1,GNAS,GNL3,GTFC3,HMGB2,IFI35,IL15,IL2RG,IL36A,ITGAV,ITGB3,KANK2,KAT5,KRAS,MAD2L1,MCM5,MCM7,MELK,MMP1,MMP2,MRC1,MS4A1,P4HA2,PBX3,PCNA,POLD3,POU2AF1,PPFIBP1,PSMB9,PTEN,RAB27A,RB1,RBBP7,RMI1,RRM1,RRM2,S100A6,SAE1,SH3BP2,TLR4,TNFRSF1B,TOB1,TP53,TPM1,VEGFA,VIM,VRK1,ZMAT3                                                          |
| MAPK8          | -0,265 | kinase                          |           | -1,312 | -1,286 | 0,004  | 6,65E-08 | 1,42E-06 | APOA1,APOE,AQP1,B4GALT5,BIRC3,CASP3,CAT,CCL5,CCNA2,CCND1,CDKN1B,COL1A1,CSTA,CYBB,CYP27A1,DDIT3,DGAT1,DNMT1,DUSP1,EGF,FOS,FOSL1,FOXO1,FOXO4,FUS,G6PC,GADD45A,HDAC6,HIPK3,IL13,JUND,LHB,MAOB,MIF,MMP1,MMP2,MMP7,MMP9,MTTP,NOS2,NOX4,NPPA,NRP1,PPARGC1A,PTEN,PTGES,RBP1,SOD2,TAC1,TBP,TLR2,TP53,VDR,VEGFC,ZFP36                                                                                                                                                                                                                                 |
| WNT5A          | 0,180  | cytokine                        |           | 1,247  | 1,248  | 0,000  | 7,36E-08 | 1,56E-06 | ARHGDI1,CAPN1,CCND1,CD14,CD38,CD40,COL1A1,CXCL1,CXCL12,CXCL6,CXCR4,DAB2,ENPP2,ESR1,FLNA,FN1,FOXN1,ID2,ID3,IL15,IRF1,IRF2,IRF8,LCP1,MMP1,NFKB1,NOS2,NR0B2,PITX3,PRKCI,PRLR,PTEN,SDC1,SPARC,SPP1,STAT1,STAT3,TLR1,TLR3,TLR4,TLR5,TNFSF10,VEGFA,VIM                                                                                                                                                                                                                                                                                             |
| ELOVL5         | -0,122 | enzyme                          |           | 1,149  | 1,123  | -0,006 | 8,06E-08 | 1,70E-06 | ACACA,ACADL,CYP4A11,EHHADH,ELOVL6,FOXO1,G6PC,HADHA,HMGCS2,MLXIPL,PCK1,PKD4,PLTP,PNPLA2,PPARGC1A,SCD,TRIB3                                                                                                                                                                                                                                                                                                                                                                                                                                    |
| MTPN           |        | transcription regulator         | Activated | 3,028  | 3,084  | 0,010  | 8,31E-08 | 1,75E-06 | ANXA1,BAX,BCL2A1,BCL2L2,BNIP3,CASP3,CASP8,CCNA2,CCNB1,CCNB2,CCND1,CCND2,CCND3,CDK1,COL1A1,COL1A2,DDC,ENG,FAS,FN1,FOS,LTB,MIF,NFKB1,NPPA,S100A10,S100A6,S100A8,SPARC,SPP1,TNFSF10,TUBA1A,VCAM1                                                                                                                                                                                                                                                                                                                                                |

|                                             |        |                                 |           |        |        |        |          |          |                                                                                                                                                                                                                                                                                                                                                                                                                                                                                                                                                                                              |
|---------------------------------------------|--------|---------------------------------|-----------|--------|--------|--------|----------|----------|----------------------------------------------------------------------------------------------------------------------------------------------------------------------------------------------------------------------------------------------------------------------------------------------------------------------------------------------------------------------------------------------------------------------------------------------------------------------------------------------------------------------------------------------------------------------------------------------|
| BCL6                                        | 0,401  | transcription regulator         |           | 0,108  | 0,090  | -0,003 | 8,65E-08 | 1,82E-06 | A2M,ADCY9,BACH2,BAX,BCL2A1,BCL6,BLNK,CCND1,CCND2,CCR7,CD151,CD2,CD44,CD69,CDKN1B,CISH,CLEC10A,COL1A1,CPD,C TSK,CXCL10,DOCK10,DPYSL2,EPB41L2,FAS,FCGRT,GABARAPL1,GADD45A,HACD1,HERC6,IL13,IL13RA1,IL18,IL2RB,IL4R,IL6R,IL7R,IRF8,IRF9,ITGA3,KLK1,LITAF,LPIN1,MAF,MGP,MRC1,MSH2,MYB,NFKB1,NOS2,PLA2G4A,PTEN,RHOF,RORC,SCP2,SDC1,SMC3,SOC S2,SYK,TACSTD2,TP53,UBA7,VWA5A,XBP1                                                                                                                                                                                                                   |
| linoleic acid                               |        | chemical - endogenous mammalian |           | -0,639 | -0,620 | 0,003  | 8,74E-08 | 1,83E-06 | ACADM,APOA1,CD36,CD47,CLU,CYP4F12,CYP4F2,DDIT3,DUSP1,FABP1,G6PC,HSP90B1,HSPA5,ICAM1,LHB,MLXIPL,MMP1,MTTP,N EDD4L,NOS2,PECAM1,PKLR,PLIN2,RXRA,S100A8,S100A9,SCD,UCP2,VCAM1,VEGFA                                                                                                                                                                                                                                                                                                                                                                                                              |
| MAP2K7                                      |        | kinase                          |           | 0,168  | 0,181  | 0,004  | 9,76E-08 | 2,04E-06 | ATF3,BIRC3,CCL5,CCND1,CSTA,CXCL10,EFNB2,ENPP2,FAS,FCG RT,FN1,GJA1,HSPA5,IL1R1,KLC1,LSP1,MAOB,MAPK8,MTTP,NPPA ,PDIA3,PLA2G4A,RHOB,SERPINC1,TFPI2,VDR                                                                                                                                                                                                                                                                                                                                                                                                                                          |
| ATP                                         |        | chemical - endogenous mammalian |           | -0,615 | -0,583 | 0,005  | 1,04E-07 | 2,16E-06 | AHR,BAX,CAPN1,CAPN2,CASP1,CCND1,CCR5,CCR7,CD14,CD200 ,CD83,CD86,CDKN1B,CLDN1,CXCL10,CXCR4,DUSP1,F3,FLNA,FO S,FOXO1,GCLC,GCLM,HIF1A,ICAM1,IL33,ITGAM,LCN2,MMP1,NOS 2,NR4A1,NRP1,SELL,SLC12A3,TLR4,TNFRSF1B,TP53,TRPV1,TXN, VCAM1                                                                                                                                                                                                                                                                                                                                                              |
| ZBTB16                                      | -0,736 | transcription regulator         | Inhibited | -2,946 | -2,943 | 0,000  | 1,04E-07 | 2,16E-06 | BACH2,BCL6,BID,BMP7,CASP3,CCNA2,CCR2,CD14,CD180,CD2,C D3D,CD3G,CD44,CD55,CD74,CD81,CD83,CD86,CD8A,COL1A1,CX CL10,EYA2,F2RL1,FGFR3,ID2,ID3,IFNGR1,IL10RA,IL13,IL4R,IL7R,IT GAV,ITGB3,KCNJ8,KLRB1,LY86,LY96,MAF,MMP9,RARG,RORA,RO RC,RUNX3,SELL,SELP,SOX13,SPP1,TSC22D1                                                                                                                                                                                                                                                                                                                        |
| KLF2                                        | 0,390  | transcription regulator         |           | 1,622  | 1,612  | -0,002 | 1,09E-07 | 2,25E-06 | ACE,ACKR3,ADM,ASS1,CAV1,CCL5,CCND3,CCR2,CCR5,CCR7,CD 36,CD40,CD44,CD55,CD86,CD93,COL4A1,CX3CR1,CXCR4,CYP1B1 ,DOCK2,F2RL1,F3,FGR,FUT4,GADD45A,HBB,HIF1A,HPSE,HYAL2,I D1,ID3,IL2RG,IL6R,IL7R,ITGB2,ITGB3,KITLG,LEPR,NDRG1,NOTCH 2,PECAM1,PLOD2,PRF1,S1PR1,SELL,SERPINB9,SLCO2A1,STAT1, STAT3,TCF4,TERT,TFPI2,TIMP1,VAV1,VCAM1,VWF                                                                                                                                                                                                                                                              |
| TXN                                         | -0,333 | enzyme                          |           | 0,648  | 0,652  | 0,001  | 1,24E-07 | 2,55E-06 | ACADM,APOA1,CCND2,CD38,CD40,CD86,CYP1B1,ESR1,FOS,HIF1 A,ICAM1,MIF,MMP9,MS4A1,NFKB1,NOS2,NSF,SELL,SOD2,TP53,TX N,VEGFA                                                                                                                                                                                                                                                                                                                                                                                                                                                                        |
| L- triiodothyron ine                        |        | chemical - endogenous mammalian | Inhibited | -2,283 | -2,255 | 0,003  | 1,25E-07 | 2,56E-06 | A2M,ACOX1,ACSL1,ACTB,ADCY9,ADM,ADRB2,AFP,ALB,ANGPTL3, APOA1,APOC1,APOC3,APOM,ARSA,ATP1A3,BNIP3L,C1S,CCND1, CD36,CD44,CDKN1B,CGA,CLU,COL4A1,CSHL1,CTH,CXCL12,CYP1 7A1,CYP27B1,CYP4A11,DIO1,DUSP1,DVL1,EGF,EHHADH,EIF4EBP 2,ENG,ENPP2,ESR1,FABP1,FAS,FH,FOS,G6PC,GNAI2,HIF1A,HR,I D1,ID2,ID3,IGFBP4,IGFBP6,INHA,ITGA7,ITGAV,ITGB3,KLF9,LYZ,ME 1,MLXIPL,MMP9,NKX2- 5,NME1,NOS2,NR1H3,NR4A1,OAT,PARP1,PCK1,PCK2,PKD2,PKD4 ,PER1,PITX3,POR,PPARA,PPARGC1A,PRDX2,PRDX3,PRKCC,PRK CZ,PTH1R,PTTG1,PYGL,RASGRP1,RGN,ROCK1,RYK,SCD,SHBG, SLC2A2,SMAD7,SP3,ST3GAL4,ST6GAL1,THRB,TIAM1,TP53,TRHD F1,ICP2 |
| miR-16-5p (and other miRNAs w/seed AGCAGCA) |        | mature microRNA                 |           | -1,027 | -1,103 | -0,010 | 1,27E-07 | 2,60E-06 | ABHD10,ARL2,BCL2L2,CACNA2D1,CAPRIN1,CARD8,CCND1,CCN D2,CCND3,CDC14B,CSHL1,ECHDC1,EIF2B2,EIF4G2,FGF7,FNDC3 B,GALNT7,GFPT1,GRB10,GRN,GSTM4,HERC6,HPF1,HSDL2,HSP9 0B1,IFRD1,ITGA2,KITLG,LAMC1,LAMTOR5,MLLT11,MSH2,MYB,NO TCH2,NPR3,PANX1,PDCD4,PLAG1,PMS1,PNP,PRIM1,PSAT1,RAB2 1,RARS1,RECK,RIDA,RNASEL,SERPINE2,SKAP2,SLC12A2,SLC16 A3,SLC38A1,TIA1,TMEM43,TPI1,TPPP3,TXN2,UCP2,VEGFA,VT1B, WIPF1,WT1                                                                                                                                                                                          |
| ATF4                                        |        | transcription regulator         |           | -1,341 | -1,286 | 0,008  | 1,29E-07 | 2,64E-06 | ABCG2,ANGPTL3,ASNS,ATF3,CALR,CDKN1B,CTH,CYP27A1,DDIT 3,FN1,FYN,GADD45A,GARS1,GCH1,GHITM,GRB10,GYS1,HNF4A,H SP90B1,HSPA5,IGFBP7,IHH,KLF9,MRPS7,MTHFD2,NDRG1,NID2,N OX4,NR1H3,OSMR,PCK1,PCK2,PHGDH,PMP22,PPP1R15A,PRKN, PSAT1,SERPINF1,SHMT2,SLC1A5,SLC38A3,SLC3A2,SOD2,SSBP2 ,SST,STAT3,STC2,TKT,TNFRSF1B,TRIB3,VEGFA,WARS1                                                                                                                                                                                                                                                                   |
| RASSF1                                      |        | other                           |           | 1,368  | 1,378  | 0,002  | 1,30E-07 | 2,65E-06 | ABAT,APOE,BHLHE40,CARD8,CASP3,CASP4,CAV1,CAV2,CCNA2, CCND1,CCND2,CLU,COL4A1,COL4A2,CPE,CRIP2,CXCR4,DAB2,EF EMP1,EFNB2,EPB41L3,ESR1,FOS,GHR,HLA- DPA1,HOXA1,LITAF,MDK,MMP2,MRAS,PLK2,SPP1,SRPX,TUBB,TU BB2A                                                                                                                                                                                                                                                                                                                                                                                   |
| F2R                                         | 0,190  | G-protein coupled receptor      | Activated | 1,972  | 2,010  | 0,006  | 1,38E-07 | 2,80E-06 | BIRC2,CASP3,CASP4,CCND1,CD24,CD44,CD55,CDH11,CLDN3,CX CL12,DUSP1,ESR1,F11,F3,FBP1,FN1,FOS,GJA1,ICAM1,IGFBP7,KR T19,LAMB1,MCAM,MIF,MMP2,MMP9,NR4A1,RHOA,S100A4,SELP,T FPI2,TJP1,TP53,VCAM1,VEGFA,VEGFC,VIM,VWF                                                                                                                                                                                                                                                                                                                                                                                |
| NEUROG1                                     | -0,079 | transcription regulator         | Inhibited | -2,635 | -2,646 | -0,002 | 1,43E-07 | 2,88E-06 | ADD3,ASS1,C1orf115,C1S,C3,CCND2,CFH,COL3A1,CXCL1,FN1,GA S2,GASK1B,ITGB3,LCP1,MMP9,P4HA2,PAPPA,PLK2,PPIC,PXDN,R HOA,RIPOR2,S100A4,SERPINF1,SLC43A3,SQOR,TRIM22,TSPAN7                                                                                                                                                                                                                                                                                                                                                                                                                         |

|                                                          |        |                                               |           |        |        |        |          |          |                                                                                                                                                                                                                                                                                                                                                                                                                                                                                                                                                                                                                                                                                                                                                                                     |
|----------------------------------------------------------|--------|-----------------------------------------------|-----------|--------|--------|--------|----------|----------|-------------------------------------------------------------------------------------------------------------------------------------------------------------------------------------------------------------------------------------------------------------------------------------------------------------------------------------------------------------------------------------------------------------------------------------------------------------------------------------------------------------------------------------------------------------------------------------------------------------------------------------------------------------------------------------------------------------------------------------------------------------------------------------|
| NFKB1                                                    | 0,370  | transcription regulator                       | Activated | 2,868  | 2,915  | 0,007  | 1,52E-07 | 3,06E-06 | A2M,AKR1B1,APOE,B2M,BAX,BCL2A1,BHLHE40,BIRC3,CCL19,CC<br>L20,CCL5,CCND1,CCND2,CD3G,CD40,CD59,CD86,CFB,COL1A1,C<br>OL1A2,CRMP1,CTCF,CTSB,CXCL10,CXCL11,CXCL9,CYBB,DICER1<br>,DROSHA,DUSP1,EHF,ENPP2,FAS,FCGRT,FOS,FOSB,FSCN1,GAD<br>D45A,GBP1,GJA1,GNAI3,GRK5,HLA-<br>DMB,ICAM1,IFNGR2,IGHM,IGKC,IL13,IL18,IRF1,ISG15,LGALS1,LTB,<br>MAT2A,MMP7,MMP9,MYB,NFKB1,NMI,NOD2,NOS2,NOX5,NR4A1,N<br>R4A3,PRKCD,PTPN6,RACK1,SELP,SOD2,STAT1,TERT,TLR2,TNFS<br>F10,TP53,VCAM1,VEGFA,WT1<br>ALPL,B2M,CAV1,CAV2,CCND1,CCND2,CD44,CLCN6,COL1A1,COL<br>1A2,COL4A1,COL4A2,COX6A2,CPE,CSK,DAB2,DDIT3,DHCR7,ESR<br>1,FOS,FSTL1,GHR,HCK,HS3ST1,ID3,IDI1,IGFBP4,IGFBP7,IL15,INS<br>R,ITGAL,KITLG,KRT10,LAMB1,MAPT,MMP9,MYO1F,NKX2-<br>5,NOS2,OXT,PTH1R,RHOB,SHC3,SLC27A2,SOX4,SPARC,STAT3,S<br>YK,TFEB |
| HMGA1                                                    | -0,032 | transcription regulator                       |           | 0,189  | 0,209  | 0,003  | 1,58E-07 | 3,16E-06 | ACAA2,AHR,AK2,ALDH9A1,AP1M2,ARAF,ARFIP1,ARHGAP29,ARP<br>C1B,CAV1,CD164,CD59,CD59,CD14B,CERS2,CHP1,CYP1B1,DCTD,DR<br>AM1,EIC2,ELF4,ELK3,ERH,GLI3,GNAI3,HADH,HTATIP2,IFRD2,IQG<br>AP1,KLF15,LAMC1,LITAF,LMNB1,LRRC1,MAPK1IP1L,MDFIC,MMAD<br>HC,MTMR6,MYH9,NECAP2,OSBPL8,PGM1,PGRMC2,PLP2,PRKD1,<br>PTPN12,PTTG1IP,RARG,RHOG,RYK,SEC11A,SLC17A5,SLC22A5,S<br>MCO4,STAT3,SUCLG2,SWAP70,SYNGR2,TLCD3A,TMBIM1,TMEM2<br>48,TNFRSF21,TOM1L1,TSC22D4,TSKU,TSPAN15,TUBB6,ZCCHC2<br>4                                                                                                                                                                                                                                                                                                          |
| miR-124-3p<br>(and other<br>miRNAs<br>w/seed<br>AAGGCAC) |        | mature<br>microRNA                            |           | -1,476 | -1,556 | -0,010 | 1,63E-07 | 3,26E-06 | C2,CCL20,CXCL1,DUSP1,ENO1,FCER1G,HLA-<br>C,IFI6,IFIT2,IFITM1,IFITM2,OAS1,OAS2,OAS3,SPP1,STAT1,TXNIP,U<br>BE2L6,WARS1                                                                                                                                                                                                                                                                                                                                                                                                                                                                                                                                                                                                                                                                |
| GAPDH                                                    |        | enzyme                                        | Inhibited | -2,731 | -2,748 | -0,004 | 1,66E-07 | 3,32E-06 | ACSL1,AQP1,ATF3,BCL6,CA2,CASP8,CD36,CD74,CIB2,COL1A1,C<br>OL1A2,DMPK,FKBP5,FOS,G0S2,GJA1,GRB10,HLA-<br>DQA1,ID2,KITLG,MAPT,MEF2C,NET1,NR4A1,PC,PCK1,PDE8A,PDK<br>4,PER1,PLIN2,POSTN,PPARGC1A,PRDX2,PVALB,RB1,RXRA,SCD,<br>SMAD7,ST3GAL5,ST8SIA4,SUCLA2,TKT,TWF2                                                                                                                                                                                                                                                                                                                                                                                                                                                                                                                     |
| LIPE                                                     |        | enzyme                                        |           | -1,007 | -1,000 | 0,002  | 1,68E-07 | 3,33E-06 | ALDH1B1,AURKA,CASP3,CBFB,CCNA2,CCNB1,CCND1,CCR7,CD4<br>4,CDK1,CLUH,COL1A1,COL1A2,COL3A1,DDX56,DICER1,DZIP1,EIF<br>4G2,ERF,ETV2,EZH2,FARP1,FN1,FOSL1,GAB2,GPX7,ID2,IL6R,ITG<br>B3,KRAS,MAD2L1,MCM2,MCM3,MCM5,MCM6,MCM7,MYD88,NAP1L<br>1,NFKB1,ORC6,PBX2,PCGF2,PKM,PLAGL2,PROM1,RBM38,RCAN1<br>,RFC2,RIOX2,RRM1,RRM2,S100A4,SCD,SLC25A13,SMAD2,SSR1,S<br>TAT3,TLR4,TRAP1,VIM,ZFP36                                                                                                                                                                                                                                                                                                                                                                                                    |
| let-7                                                    |        | microRNA                                      | Inhibited | -3,355 | -3,428 | -0,010 | 1,70E-07 | 3,37E-06 | AEBP1,C1QA,C1QB,CCL5,CCR2,CCR5,CD163,CD40,CD86,COL1A1<br>,COL1A2,COL4A1,COL4A2,COL6A3,CXCL10,CXCL12,CXCL6,CXCR<br>4,DCN,FBN1,FN1,GPT,HTR2B,IL13,IL18,ITGAL,LUM,MMP2,MMP9,P<br>4HA1,PCOLCE,PLOD1,SLPI,SPARC,TGFBI,TIMP1,TIMP2,TNC,TXL<br>NA,VCAN                                                                                                                                                                                                                                                                                                                                                                                                                                                                                                                                     |
| CCR2                                                     | 0,955  | G-protein<br>coupled<br>receptor              | Activated | 3,893  | 3,932  | 0,006  | 1,82E-07 | 3,60E-06 | ABCG1,ACACA,ACOX1,AQP3,BCL2A1,CD36,CD40,CD83,CD86,CLU<br>,COL1A2,DDIT3,DNAJB9,ELOVL6,F3,FABP1,FAS,FOS,FOSL1,MRC<br>1,PECAM1,PKLR,PLA2G4A,PLD1,PLTP,PNPLA2,PRKD1,PTGES,PT<br>GS1,RXRA,SCD,SELP,SOAT1,TNFRSF1B,UCP2,VCAM1,VIM                                                                                                                                                                                                                                                                                                                                                                                                                                                                                                                                                         |
| arachidonic<br>acid                                      |        | chemical -<br>endogeno<br>us<br>mammalia<br>n |           | -0,538 | -0,528 | 0,002  | 1,85E-07 | 3,63E-06 | ABCC2,ABCC3,ACACA,ADH1B,ADRB2,APOA1,APOC3,APOM,BAA<br>T,C3,CPT2,CRABP1,CYP2B6,CYP3A4,DDAH1,FABP1,FABP2,FAS,<br>G6PC,GCLM,GPT,GSTA3,HNF1A,HNF4A,HSPA5,INSR,ITGAM,KN<br>G1,LCN2,MMP2,MTTP,NOS2,NR0B2,NR1I3,PCK1,PGM1,PKLR,PLTP,<br>PNPLA3,PPARA,PPARGC1A,PTGS1,RXRA,S1PR1,SDC1,SLC10A2,<br>SLC27A5,SPP1,TCEA2,TIMP1,TIMP2,TP1,TXNIP                                                                                                                                                                                                                                                                                                                                                                                                                                                   |
| NR1H4                                                    | -0,097 | ligand-<br>dependent<br>nuclear<br>receptor   |           | -1,145 | -1,148 | -0,000 | 1,86E-07 | 3,63E-06 | ACTG1,ACTN1,BCL2A1,BLNK,CCND1,CD40,CD69,CD86,CD8A,CLE<br>C2B,CTSD,CYBB,ENOSF1,EVI2A,FERMT2,FEZ2,FOSB,GADD45B,G<br>LRX,GPR18,GTF2E1,HBB,HLA-DMB,HLA-<br>DOB,HSPA8,ID3,IL10RA,IL13,IL4R,IL7,IL7R,IRF7,IRF8,KITLG,LAX1,<br>MAF,MAL,NFE2L2,NIBAN1,PIK3IP1,RB1,RIPOR2,S1PR1,SELL,SGK<br>1,SLC27A2,SS18L1,SUN2,TRIM22,UBE2L6,VIM,WARS1,XAF1                                                                                                                                                                                                                                                                                                                                                                                                                                               |
| SATB1                                                    | 0,215  | transcription regulator                       |           | -1,375 | -1,387 | -0,002 | 1,86E-07 | 3,63E-06 | AFP,AGR2,ALDH6A1,ANXA1,AQP3,ARHGFE9,CD58,CDX2,COL18A<br>1,CSHL1,CXCL10,DDC,DSE,EHFD1,ELK3,EPHX1,ERBB3,ESR1,FA<br>BP2,FKBP4,FNDC3B,FSTL1,G6PC,GBP2,GLS,HADH,HK1,HNF1A,H<br>NF1B,HNF4A,LHFPL6,LYN,MALT1,MGP,MLXIPL,MSH2,PCK1,PPAR<br>A,PRNP,RORA,RORC,S100A2,SLC12A2,SLPI,SOD1,SST,TFF3,TMP<br>RSS2,TNNI1,XBP1                                                                                                                                                                                                                                                                                                                                                                                                                                                                        |
| FOXA1                                                    | 0,206  | transcription regulator                       | Inhibited | -2,509 | -2,513 | -0,001 | 1,86E-07 | 3,63E-06 | ACE,ACP5,ACTR2,AHCY,APOE,BIRC3,BNIP3L,CAPN2,CCL5,CCND<br>1,CD83,CD8A,CDKN1B,CLIC4,COL1A1,CORO1A,CTSD,CXCL1,F3,F<br>ERMT2,FLNA,FN1,FOS,HK1,HLA-<br>B,IL1R1,IL7,ITGAM,ITGAV,ITGB3,JUND,KRT7,MAPK8,MARCKS,MA<br>T2A,MGP,MMP1,MMP2,MMP9,MTOR,NOS2,PCNA,PDGFRA,PPP6R<br>2,RASSF2,RDX,RECK,SCRN1,SDC1,SDCBP,SMAD2,SMARCA4,SP<br>ARC,SPP1,SURF1,TCF4,TGFBR2,TIMP2,TLR2,TNFAIP2,UBE2B,VI<br>M                                                                                                                                                                                                                                                                                                                                                                                               |
| FN1                                                      | 0,617  | enzyme                                        |           | 1,829  | 1,869  | 0,006  | 1,87E-07 | 3,63E-06 | ACE,ACP5,ACTR2,AHCY,APOE,BIRC3,BNIP3L,CAPN2,CCL5,CCND<br>1,CD83,CD8A,CDKN1B,CLIC4,COL1A1,CORO1A,CTSD,CXCL1,F3,F<br>ERMT2,FLNA,FN1,FOS,HK1,HLA-<br>B,IL1R1,IL7,ITGAM,ITGAV,ITGB3,JUND,KRT7,MAPK8,MARCKS,MA<br>T2A,MGP,MMP1,MMP2,MMP9,MTOR,NOS2,PCNA,PDGFRA,PPP6R<br>2,RASSF2,RDX,RECK,SCRN1,SDC1,SDCBP,SMAD2,SMARCA4,SP<br>ARC,SPP1,SURF1,TCF4,TGFBR2,TIMP2,TLR2,TNFAIP2,UBE2B,VI<br>M                                                                                                                                                                                                                                                                                                                                                                                               |

|              |        |                                 |           |        |        |        |          |          |                                                                                                                                                                                                                                                                                                                                                                                                                                                                                                                                                                                                                                                                                                                                                                                                                                                                                                    |
|--------------|--------|---------------------------------|-----------|--------|--------|--------|----------|----------|----------------------------------------------------------------------------------------------------------------------------------------------------------------------------------------------------------------------------------------------------------------------------------------------------------------------------------------------------------------------------------------------------------------------------------------------------------------------------------------------------------------------------------------------------------------------------------------------------------------------------------------------------------------------------------------------------------------------------------------------------------------------------------------------------------------------------------------------------------------------------------------------------|
| BRD4         | -0,129 | kinase                          | Activated | 3,677  | 3,733  | 0,010  | 1,88E-07 | 3,65E-06 | ACSL5,ACSM3,ALDH1B1,BHLHE40,BTN3A2,CCNA2,CCND1,CCND2,CDKN1B,COL1A1,COL1A2,COL4A1,COL5A1,CXCR4,DCTPP1,FBN1,FKBP11,FN1,FOS,GINS1,ICAM1,ICAM2,ID2,IL7R,IRF1,IRF8,KAT5,LCK,LOXL1,MAL,MAP3K1,MCM3,MLF2,MYB,MYD88,NME1,POLE2,RRM2,SMARCA4,STC2,THBS2,TIMP1,TOP2A,TUBB,TYRO3,XBP1                                                                                                                                                                                                                                                                                                                                                                                                                                                                                                                                                                                                                         |
| STAT5B       |        | transcription regulator         |           | -0,719 | -0,710 | 0,001  | 1,96E-07 | 3,79E-06 | A2M,ACOT11,AGPAT2,AHNAK,ALDH3A2,ASAP1,BAIAP2,BAX,BCL6,BIRC3,C8B,CA2,CASP3,CASP4,CASP6,CASP8,CCND1,CCND2,CCND3,CISH,COX6A2,CRADD,CSHL1,CYP17A1,CYP2A6 (includes others),CYP2B6,CYP2C8,CYP4A11,DDC,DDIT3,ESR1,FAS,FOS,GOS2,GADD45A,GADD45B,GJB1,GPD1,GPX7,GSTP1,HAO2,HSD3B2,IL2RB,IRF1,KRT19,LTB,MAF,MDH2,ME1,MOXD1,MPC2,MYL7,MZB1,NAT8,NNMT,NOX4,NPPA,NUCB1,PCSK5,PKD4,PLTP,PMM1,PPP1R3C,PRLR,PROM1,RPA1,SCD,SLC16A5,SLC34A2,SLC47A1,SOCS2,ST8SIA4,TLR2,TNNC1,TNNI1,TOX,TRIM24,WARS1,ZFP36,ACACA,ACACB,ADAM10,AFP,APOA1,CALR,CAT,CCL5,COPB1,DDIT3,DDOST,DERL1,DNAJB9,DNAJC10,ESR1,FAS,FKBP11,FN1,GALK2,GGCX,GOLGA3,GOLGA4,GOSR2,HLA-DRA,HSP90B1,HSPA5,ICAM1,KDEL3,LMAN2,MGAT2,NOS2,NR1H3,NUCB2,P3H1,PDIA3,PDIA4,PDIA6,POU2AF1,PPIB,PRNP,RAB3A,RPN2,S100A6,S1PR1,SCD,SDF2L1,SEC11A,SEC24D,SEC31A,SEC61G,SLC1A5,SLC38A1,SMC3,SOD1,SPARC,SPCS3,SSR1,SSR4,STT3A,STX18,TRAM1,TXN,VAMP2,VCAM1,WNT10B,XBP1 |
| XBP1         | 0,528  | transcription regulator         |           | 1,793  | 1,850  | 0,007  | 2,16E-07 | 4,17E-06 | A2M,ACSL1,ADRA2A,ANXA1,ANXA3,ARAF,ARG2,AVP,BAX,BMP7,CASP3,CASP8,CAST,CAT,CAV1,CCND1,CDKN1B,CGA,CLCN3,CLU,COX6A2,CTSV,CYB5A,DCN,EGF,EIF4G3,ESR1,FAM89B,FAS,FGF7,FGFR3,FN1,FOS,FOSB,FOSL1,FOXO1,GADD45A,GMFB,GPX5,HIF1A,HMGCS2,HSD3B2,ID1,ID3,JUND,KRAS,LGALS1,LHB,MAL,MAOA,MMP7,MTTP,MX1,NDRG1,NGF,NOS2,OAT,PARP1,PCNA,PDIA4,PMP22,PPARA,PRKCZ,PRLR,PTP4A1,RARG,SDC1,SELP,SERPINA5,SHBG,SLC17A1,SLC25A10,SMAD2,SNRNP25,SOD2,SRD5A2,STST,SSTR2,STAT3,SYK,SYT11,TAC3,TAP2,TBXAS1,TG,TGFBR2,TLR4,TNFRSF11B,TOP2A,TUBB2A,UBE2B,VCAM1,VCAN,YWHAE                                                                                                                                                                                                                                                                                                                                                         |
| testosterone |        | chemical - endogenous mammalian |           | 0,606  | 0,647  | 0,005  | 2,22E-07 | 4,27E-06 | A2M,ACSL1,ADRA2A,ANXA1,ANXA3,ARAF,ARG2,AVP,BAX,BMP7,CASP3,CASP8,CAST,CAT,CAV1,CCND1,CDKN1B,CGA,CLCN3,CLU,COX6A2,CTSV,CYB5A,DCN,EGF,EIF4G3,ESR1,FAM89B,FAS,FGF7,FGFR3,FN1,FOS,FOSB,FOSL1,FOXO1,GADD45A,GMFB,GPX5,HIF1A,HMGCS2,HSD3B2,ID1,ID3,JUND,KRAS,LGALS1,LHB,MAL,MAOA,MMP7,MTTP,MX1,NDRG1,NGF,NOS2,OAT,PARP1,PCNA,PDIA4,PMP22,PPARA,PRKCZ,PRLR,PTP4A1,RARG,SDC1,SELP,SERPINA5,SHBG,SLC17A1,SLC25A10,SMAD2,SNRNP25,SOD2,SRD5A2,STST,SSTR2,STAT3,SYK,SYT11,TAC3,TAP2,TBXAS1,TG,TGFBR2,TLR4,TNFRSF11B,TOP2A,TUBB2A,UBE2B,VCAM1,VCAN,YWHAE                                                                                                                                                                                                                                                                                                                                                         |
| POU2F1       |        | transcription regulator         |           | -1,779 | -1,769 | 0,003  | 2,25E-07 | 4,32E-06 | A2M,ACSL1,AOX1,BCL6,CCND1,CCNG1,CD55,CDX2,CSF1R,CYP2A6 (includes others),CYP2B6,CYP2C8,CYP2J2,DECR1,ELK3,ESR1,GADD45A,GBP2,GCLM,GPX3,GSTK1,GSTM4,HLA-DRA,HNF1B,HOMER3,ICAM1,IDH1,IGKC,JUND,NFKB1,NOS2,NXN,PRDX2,PTGES,SERPING1,SOD1,SPP1,TLR4,TMPRSS2,TNNC1,VCAM1,VWF                                                                                                                                                                                                                                                                                                                                                                                                                                                                                                                                                                                                                              |
| FGF19        |        | growth factor                   |           | 0,071  | 0,067  | -0,001 | 2,28E-07 | 4,35E-06 | ACACA,ACACB,ACSL1,AFP,APOE,CCND1,CD36,CYP17A1,ENO3,FBP1,FOS,GOS2,GADD45A,GAS2,HLA-DQB1,HSD3B2,ID1,KL,LCN2,LEPR,MCAM,MME,NR0B2,PKLR,PROM1,SCD,SERPINA3,SGK1,SLC10A2,SLC2A2,SLC2A5,SLPI,TNNI1                                                                                                                                                                                                                                                                                                                                                                                                                                                                                                                                                                                                                                                                                                        |
| RET          |        | kinase                          |           | 1,774  | 1,804  | 0,006  | 2,39E-07 | 4,53E-06 | ANXA1,ANXA4,AUH,CALB1,CCL20,CCN3,CCND1,CD151,CDKN1B,CLU,COL1A1,COL1A2,CTSB,CTSV,CXCL12,CXCR4,DCN,DPYSL2,EIF4G3,FKBP4,FOS,GJA1,HSPA8,HSPA9,IL13,MAF,MET,MMP1,MMP7,MMP9,PLOD2,PRNP,S100A9,SELL,SST,ST13,STUB1,TACC3,TP53,UBQLN2                                                                                                                                                                                                                                                                                                                                                                                                                                                                                                                                                                                                                                                                      |
| KIT          | 0,147  | transmembrane receptor          |           | -0,823 | -0,816 | 0,002  | 2,48E-07 | 4,69E-06 | ANKH,C3AR1,CCND2,CCND3,CCR2,CD164,CD44,CD53,CD63,CDKN1B,CISH,CPA3,CSF2RB,CXCR4,FCER1A,HSD17B10,ICAM1,IL13,IL15,IL15RA,IL4R,ITGAM,ITGB2,KITLG,MGST2,MTOR,PRKCQ,PSTPIP2,PTPN6,RAB32,SH3BP2,SHC1,SOCS2,SPP1,STAT1,STAT3,TJP1                                                                                                                                                                                                                                                                                                                                                                                                                                                                                                                                                                                                                                                                          |
| PTGER4       | 0,299  | G-protein coupled receptor      |           | -1,476 | -1,492 | -0,002 | 2,50E-07 | 4,72E-06 | CCL20,CCR7,CD40,CD44,CD69,CXCL10,CXCR4,CYBB,DDX58,FAM49A,GBP2,HERC6,ICAM1,IFI16,IFI35,IFIH1,IFIT2,IL18,IRF1,IRF7,ISG20,LHFPL2,LPAR6,MAFB,MAFF,MMP2,MMP9,MX1,NCF2,NOS2,PDCD4,PKD2,PTGER3,RASSF2,RNASEL,RSAD2,RTF4,S1PR1,SLAMF8,SLC13A3,SPP1,ST6GAL1,ST8SIA4,TLR8,TNFSF10,TOR3A,TRIM21,XAF1,ZDHHC14                                                                                                                                                                                                                                                                                                                                                                                                                                                                                                                                                                                                  |
| APC          |        | enzyme                          |           | 0,168  | 0,148  | -0,004 | 2,53E-07 | 4,77E-06 | CCND1,CCND2,CD44,CD55,CDX2,CLU,CXCL12,DHRS9,DPP4,FABP2,FG,GLI3,HIF1A,HNF1A,ID1,ID2,ID3,IDH3G,LCK,MDH2,MMP7,NOS2,OGDH,PARD3,PKD2,PKD4,PLA2G4A,PPARA,PRKCA,PRKCZ,PTEN,PTGS1,SDHB,SGK1,SPP1,SST,SUCLG1,SUCLG2,TFF3,TIAM1,TIMP1,TJP1,TNFRSF11B,TP53,VEGFA                                                                                                                                                                                                                                                                                                                                                                                                                                                                                                                                                                                                                                              |
| ETS1         | 0,227  | transcription regulator         | Activated | 3,501  | 3,545  | 0,007  | 2,66E-07 | 5,01E-06 | ARRHGDI,ARL4C,ARPC2,B4GALT5,BAX,BCL11A,CASP1,CAV1,CCDC90B,CCL5,CCND1,CCNG1,CD14,CD27,CD44,CD69,CDH5,CHUK,COL1A2,CSF1R,DNAJA3,FLI1,FN1,GZMA,GZMK,HPGD,HPSE,HSPA8,HSPB8,ICAM1,ID2,IL13,IL2RB,IL7R,ITGB2,ITGB3,ITGB6,ITK,JAK1,LAIR1,LCK,LTB,MET,MMP1,MMP2,MMP7,MMP9,MYB,NFIL3,PARP1,PERP,PRF1,PTPRN2,RUNX3,SELL,SPP1,SRGN,TBXAS1,TDP2,TGFBR2,THY1,TP53,VEGFA,ZEB2                                                                                                                                                                                                                                                                                                                                                                                                                                                                                                                                     |
| ATF6         | -0,007 | transcription regulator         |           | 0,282  | 0,318  | 0,008  | 2,70E-07 | 5,06E-06 | ACOX1,AURKA,CALR,CDKN3,CPT2,DDIT3,FOS,G6PC,HSP90B1,HSPA5,MANF,NPPA,NR0B2,NUCB2,PCK1,PDIA4,PLIN2,PPARA,PRDX2,PRNP,RCAN1,SLC35B1,SPARC,UBE2C,UNC13B,VEGFA,XBP1                                                                                                                                                                                                                                                                                                                                                                                                                                                                                                                                                                                                                                                                                                                                       |

|                |        |                                 |           |        |        |        |          |          |                                                                                                                                                                                                                                                                                                                                                                                                      |
|----------------|--------|---------------------------------|-----------|--------|--------|--------|----------|----------|------------------------------------------------------------------------------------------------------------------------------------------------------------------------------------------------------------------------------------------------------------------------------------------------------------------------------------------------------------------------------------------------------|
| BIRC5          | 0,145  | other                           |           | -1,728 | -1,720 | 0,003  | 2,87E-07 | 5,35E-06 | BAX,CASP3,CD53,CD74,CHUK,COL1A1,COL3A1,COL5A2,FBN1,FCGR2B, FN1,HLA-DQA1,HLA-DQB1,IGHM,IL13,IL2RG,JCHAIN,LUM,LYZ,MMP2,PTTG1,TP53,VEGFC,VIM,VWF                                                                                                                                                                                                                                                        |
| PRKCA          | -0,237 | kinase                          |           | 0,397  | 0,425  | 0,005  | 2,91E-07 | 5,43E-06 | APOBEC3G,APOM,ARHGDB,ARL4C,ARPC2,AVP,BCL11A,BNIP3L,CAV1,CCND1,CD55,CHRND,COL1A1,CSTA,CTSB,CXCL10,CYBB, FN1,FOS,ICAM1,ID1,ID2,ID3,IFIT3,MMP1,MMP9,NFKB1,NOS2,NPPA,PLD1,PRKCD,PTEN,PTPRN2, RB1,RSAD2,S100A8,S100A9,SDCBP,SELP,TP53,VCAM1,VEGFA                                                                                                                                                         |
| 26s Proteasome |        | complex                         |           | 1,112  | 1,081  | -0,005 | 3,13E-07 | 5,82E-06 | AHR,ATG4A,ATP6V1D,BAG3,BAX,BIRC2,BIRC3,CCNA2,CDK1,CDKN1B,CLCN7,CTSB,CTSD,CTSF,DDIT3,DDX58,EGF,ESR1,FOSL1,FOXO1,GCH1,HMGB2,HSPB1,HSPB8,ICAM1,IFI35,MAD2L1,MICB,NFKB1,PRKCA,PRNP,PSMB5,PSMB6,PTEN, RB1,RUNX3,S1PR1,SMAD2,STAT1,TNFSF10,TOP2A,TP53, TXNIP,UBD,UBE2I,UBFD1,VIM,WBP2,WIPI1                                                                                                                |
| BAX            | 0,426  | transporter                     | Activated | 2,312  | 2,346  | 0,008  | 3,57E-07 | 6,58E-06 | BAX,BIRC2,CASP3,CCL5,CCNB1,CDK1,CDKN1B,CTSB,CTSD,CTSK,CTSS,CXCL10,DNAJB9,HLA-A,IFITM2,IFNAR2,IL15,IRF7,JAK1,MMP9,PDIA6,TIMP1, TYK2,XBP1                                                                                                                                                                                                                                                              |
| cholic acid    |        | chemical - endogenous mammalian |           | 0,763  | 0,774  | 0,002  | 3,72E-07 | 6,81E-06 | ABCC2,ABCC3,ACE,ACOX1,APOA1,APOM,CCNG1,CDX2,CIRBP,CYP27A1,CYP2B6,CYP3A4,CYP4A11,DHCR7,EGF,EHHADH,EPHX1,FABP1,FBP1,G6PC,MDK,MYB,NR0B2,NR1H3,PCK1,PLTP,PPARGC1A,RBP1,SLC10A2,TM4SF5                                                                                                                                                                                                                    |
| PTH            |        | other                           |           | 0,859  | 0,895  | 0,006  | 4,15E-07 | 7,56E-06 | ADAMTS1,ADD3,AHNAK,ALPL,BHLHE40,CALB1,CCND1,CDKN1B,COL1A1,COL1A2,CXCL12,CXCR4,CYBA,CYP27B1,CYP3A4,DDIT3,DUSP1,EFNB2, FN1,FOS,FOSB,GALNT3,GJA1,HSPA5,IL33,IL6R,ITGAV,KL,LIMA1,MGP,MME,MMP1,MMP2,NFIL3,NR4A1,PALM,POSTN,PTH1R,SLC34A1,SLC9A3,SMAD7,SPP1,ST14,TFPI2,THBS4,TNFRSF11B,TNS1,TRPV5,VDR,WIF1,WNT10B                                                                                          |
| SCAP           | -0,125 | other                           |           | -1,416 | -1,370 | 0,010  | 4,16E-07 | 7,57E-06 | ACAA2,ACACA,ACACB,ACSL1,ACSL5,ALB,ASNS,ATF3,CSF1R,CYB5A,CYP2B6,CYP4F2,DDIT3,DHCR7,EHHADH,ELOVL6,HMGCS2,ID1,ID11,IGHM,MSMO1,MTHFD2,NSDHL,PLA2G4C,PMVK,RDH11,REG1A,SC5D,SCD,TFF3,TM7SF2,TRIB3                                                                                                                                                                                                          |
| POU2F2         |        | transcription regulator         |           | 1,323  | 1,374  | 0,010  | 4,39E-07 | 7,94E-06 | ADA,ALOX5,ARG2,ASB13,BANK1,BCL6,CCR5,CD69,DEPP1,DHRS9,ELL2,ENO1,GATM,GGA2,GPR183,HLA-DRA,HNF1B,IGKC,LCK,MCM7,MS4A1,NOS2,PFKFB3,SCD,SIRT3,SNRPB,SPP1,SSTR2,STAT3,TERT,TIMP2,TNFAIP2,TNFRSF21,XBP1                                                                                                                                                                                                     |
| CIITA          | -0,091 | transcription regulator         | Activated | 3,181  | 3,197  | 0,004  | 4,63E-07 | 8,34E-06 | B2M,BTN2A2,CCND1,CD74,COL1A1,COL1A2,GCNT2,HLA-A,HLA-B,HLA-DMA,HLA-DMB,HLA-DOA,HLA-DOB,HLA-DPA1,HLA-DQA1,HLA-DQB1,HLA-DRA,HLA-DRB1,IL13,MMP9                                                                                                                                                                                                                                                          |
| SOD1           | -0,288 | enzyme                          |           | -1,343 | -1,364 | -0,006 | 4,90E-07 | 8,81E-06 | ACO1,ACTB,APOE,ASL,ASS1,ATP1A3,ATP6V1G2,AURKAIP1,B2M,BAG3,BAX,BID,C1QA,CASP1,CASP3,CASP4,CAST,CCND1,CD14,CD36,CDK5,CGA,CLU,COL1A1,COMT,CSF1R,DAO,DCXR,FOS,GAK,GCLC,GCLM,GNAS,GNB1,GNP7,GPX3,GSTP1,GUK1,HPCAL1,HSBP1,HSPA8,HSPB8,ICAM1,IL15,JPT1,KCNAB2,MAOB,MET,MMP9,NDUFA1,NETO2,NFE2L2,NFIL3,NOS2,PLCB4,PRRX1,PSMB5,PSMB8,RAC1,RDX,SH3BGL3,SHANK2,SNCG,SOD1,SOD2,SPP1,STAT4,STMN1,TGFB2,TP53,VCAM1 |
| IFNL4          |        | cytokine                        | Activated | 2,950  | 2,979  | 0,010  | 5,07E-07 | 9,08E-06 | CXCL10,CXCL11,DDX58,IFIH1,ISG15,MX1,OAS1,OAS2,STAT1                                                                                                                                                                                                                                                                                                                                                  |
| GLI1           | -0,186 | transcription regulator         |           | 1,839  | 1,900  | 0,008  | 5,23E-07 | 9,34E-06 | ABCG2,ACADVL,ARC,ARPC5,BCL2A1,BID,CAV1,CCND1,CCND2,CD24,CDH11,CLU,COL1A1,FAS,FGF1,FHL1,GMFG,GPC3,GPER1,HPSE,ID2,IGFBP6,IGFBP7,IMPA2,KRT19,MEF2C,MMP2,MMP9,NPDC1,NQO2,NR2F2,PCOLCE2,PDGFRA,PLOD1,PLPP2,PPT2,PRKCI,PSTPIP2,PTH1R,RGS10,RHOB,RNASEL,RRAS2,RXRA,S100A9,SFRP1,SH2B3,SH3GLB1,SPP1,TERT,TNC,TP53,TSC22D1,TTC13,TUFM,U                                                                       |
| SMAD7          | -0,363 | transcription regulator         |           | -1,745 | -1,763 | -0,003 | 5,25E-07 | 9,37E-06 | ALDOB,APOC3,BIRC2,BMP7,BZW2,CCL5,CCNA2,CCNB1,CDK1,CDKN1B,CDKN2C,CKM,COL1A1,COL1A2,COL3A1,COL6A3,CXCL10,CXCL12,DCN,EFEMP1,FAS, FN1,FOXO1,GADD45A,ICAM1,ID1,ID2,ID3,ITGA7,LTBP3,MET,MMP1,MMP2,MMP9,NET1,NID2,NOS2,PCNA,PTROM1,RAC1,SCD,SMAD7,TERT,TGFB1,TGFB2,TIMP1, TXN,VEGFA                                                                                                                         |
| BTK            | 0,188  | kinase                          | Inhibited | -2,494 | -2,487 | 0,001  | 5,27E-07 | 9,38E-06 | BAG1,BCL2A1,CCND2,CCND3,CCR7,CCT6A,CD2,CD38,CD40,CD69,CD86,CISH,CXCL10,CXCL9,CXCR4,ENPEP,FOXO1,IFI35,IFI44L,IFIT3,IFITM1,IL10RA,IL13,IL18,IRF1,IRF9,ISG15,ISG20,ITGAV,ITGB3,MTHFD2,MX1,MX2,NCL,OAS2,OAS3, RB1,SELP,STAT1,TP53                                                                                                                                                                        |
| NFAT5          | 0,054  | transcription regulator         |           | 1,344  | 1,387  | 0,008  | 5,91E-07 | 1,04E-05 | AKR1B1,AQP1,BCL2A1,C2,CD24,COL1A1,COL1A2,CXCL10,CYBB, F3,IGFBP7,IL6R,IRAK1,JAM2,LCN2,NFKB1,NOS2,NOX4,NUDT1,PFKP,PTGES,PTGS1,RRM2,S100A4,SEMA4C,SGK1,SPP1,TLR2,TNFAIP2,TNFRSF11B,TNFRSF21,VEGFA,VLDR,VWF                                                                                                                                                                                              |
| ATF3           | -1,112 | transcription regulator         |           | -0,889 | -0,900 | -0,002 | 5,92E-07 | 1,04E-05 | ADIPOR1,ASNS,ATF3,AURKA,BHLHE41,BIRC3,CCL5,CCND1,CD69,CD83,CDK1,CGA,CXCL1,DDIT3,FBP1,G6PC,GBP2,HSPA5,ICAM1, ID1,KAT5,MMP1,MMP2,MSH2,NOS2,PCK1,PPP1R15A,PTGES,RSA D2,SLC15A3,SRI,STAT3,TLR2,TP53,XBP1                                                                                                                                                                                                 |



|           |        |                         |           |        |        |        |          |          |                                                                                                                                                                                                                                                                                                                                                                                                                                                                                                                                                                                                                                                                                                                                                                                                                 |
|-----------|--------|-------------------------|-----------|--------|--------|--------|----------|----------|-----------------------------------------------------------------------------------------------------------------------------------------------------------------------------------------------------------------------------------------------------------------------------------------------------------------------------------------------------------------------------------------------------------------------------------------------------------------------------------------------------------------------------------------------------------------------------------------------------------------------------------------------------------------------------------------------------------------------------------------------------------------------------------------------------------------|
| CAV1      | 0,676  | transmembrane receptor  |           | 1,919  | 1,934  | 0,003  | 6,08E-07 | 1,07E-05 | ADAM17,AFP,CAV1,CAV2,CAVIN1,CCND1,CD14,CD36,CSF1R,CTSD,ESR1,FAS,FOLR1,FOS,GIPC2,HSPA8,ICAM1,IDO1,IDO1,INSR,KRT19,KRT4,KRT7,MMP1,NEDD4L,NOS2,NPPA,NR4A1,NTRK2,PCNA,PK2,PLA2G4A,PRLR,PROM1,PTEN,RAC1,SLC12A2,SLC1A1,SPAG9,ST6GAL1,ST6GALNAC4,TJP1,TMEM87A,TP53,VCAM1,WFDC2                                                                                                                                                                                                                                                                                                                                                                                                                                                                                                                                        |
| JAK1      | 0,628  | kinase                  | Activated | 3,052  | 3,095  | 0,009  | 6,37E-07 | 1,12E-05 | BID,CAPN1,CD14,CD40,CDKN1B,ENPP2,FOS,HIF1A,HLA-A,HLA-C,HLA-F,ICAM1,IDO1,IFIT2,IL4R,IRF1,IRF7,IRF9,MMP2,MX1,OSMR,PSMB9,SLC1A3,SMAD7,STAT1,STAT3,TAP1,TNFRSF21                                                                                                                                                                                                                                                                                                                                                                                                                                                                                                                                                                                                                                                    |
| HBA1/HBA2 |        | transporter             | Inhibited | -4,181 | -4,146 | 0,008  | 6,48E-07 | 1,13E-05 | ATP5MC2,COX15,COX6A2,COX8A,CYC1,HIF1A,NDUFA3,NDUFA7,NDUFB11,NDUFB7,NDUFC1,NDUFS3,NDUFS4,NDUFS7,NDUFS8,NDUFV1,SURF1,UCP2,UQCRC1,UQCRC2,VEGFC                                                                                                                                                                                                                                                                                                                                                                                                                                                                                                                                                                                                                                                                     |
| IKBKG     |        | kinase                  |           | 1,803  | 1,849  | 0,007  | 6,51E-07 | 1,13E-05 | AEBP1,BAX,BIRC3,C3,CCL5,CD247,CLU,CTSB,CTSF,CTSXCXCL10,CXCL12,CXCL6,DCN,ENPP2,FOS,GBP2,GCH1,GM2A,GPT,GRN,HIF1A,HLA-A,ICAM1,IFI16,IGFBP6,IRF7,ISG15,LCN2,MGP,NAGLU,NGF,NOCT,NPPA,PPARA,PTEN,RCAN1,SERPINE2,SFRP1,SGK1,TG,TNFAIP2,TNFRSF1B,TNFSF10,VEGFA                                                                                                                                                                                                                                                                                                                                                                                                                                                                                                                                                          |
| CREB1     |        | transcription regulator |           | -0,123 | -0,089 | 0,003  | 6,55E-07 | 1,14E-05 | ADM,AKAP1,APOE,APOLD1,ARC,ARHGAP33,ARL15,ATF3,ATP2B4,ATP6V0D1,AURKA,AVP,BAG3,BCAP29,BHLHE40,BNIP3,CA10,CACNA2D1,CCNA2,CCNB1,CCNB2,CCND1,CCND3,CD3D,CD9,CDA,CDH11,CDK14,CGA,COX8A,CPD,CRMP1,CRYM,CXCR4,CYFIP2,CYP46A1,DUSP1,EBP,EHD4,ESRRG,FABP2,FGF13,FGL2,FN1,FOS,FO SB,FRAT1,G6PC,GAD1,GADD45A,GADD45B,GADD45G,GALNT1,GLS,GPNNB,GPR3,HECA,HLA-A,HLA-DQB1,HLA-DRA,HLA-G,HPCAL1,HPGD,HSPA5,IDO1,IDO1,INHA,IRF7,JPT1,KDELRL3,KYAT1,LAPTM4B,LCN2,LITAF,MARCKSL1,MAT2A,MCAM,MCM5,MCM6,MC TP1,MMP1,MNS1,MRC1,MRPL49,MSMO1,MYO1B,NAB2,NDUFA10,NDUFV1,NFIL3,NOS2,NOX5,NR4A1,NR4A3,NRP1,OSTF1,OXT,PCK1,PCNA,PDGFRA,PER1,PLA2G4A,PPARGC1A,PPP1R15A,RAC3,RALYL,RB1,RIPOR2,ROBO1,RRAS2,SCD,SGK1,SHTN1,SIK3,SLC35G2,SOD2,SOD2,SRPK2,SSBP2,SSR4,SST,STAT3,STMN1,SULT2B1,TAC1,TAGLN2,TG,TIPARP,TMBIM1,TSKU,TXN,VEGFA,VIM,ZFP |
| KLF3      | 0,160  | transcription regulator |           | -1,940 | -1,968 | -0,003 | 6,84E-07 | 1,18E-05 | ACOT11,AHNAK,ALDH3B1,ANXA5,AP1M2,APOE,APRT,BCAP29,BCL2L2,BLOC1S1,BOLA1,CAPG,CARHSP1,CBFB,CCT3,CD1D,CD55,CD69,CD93,CDK10,CIRBP,CSNK1G3,ELMO1,EXTL1,FAM49A,FCGRT,FOS,GAD1,GALNT1,GSTK1,GSTP1,HBB,HEXB,HNRNPF,HS3ST1,LDH1,KBTBD2,LY96,MAGED1,MAN2A2,MAPK12,MCAT,MGST2,MIF,MRPL34,MSN,MTCH2,MZB1,NDRG1,NSMAF,OGFRL1,PATJ,PCYOX1,PDLIM1,PDLIM2,PECAM1,PFKP,PIK3IP1,PLPP2,PTP4A2,RMDN1,RNF167,SCP2,SDC1,SEC24D,SELL,SGK1,SIGIRR,SLC6A13,SMPDL3A,SP140,SSBP2,STAT4,TDRD7,TES,TNFRSF21,TOPORS,TRIM32,TUBA1A,TYROBP,UBL3,UGCG,VAV1,VIM,ZDHHC14,ZEB2,ZMAT5                                                                                                                                                                                                                                                                |
| PRKAA1    | -0,043 | kinase                  |           | -0,067 | -0,092 | -0,004 | 7,06E-07 | 1,22E-05 | ACKR3,ACOT7,ALB,ARHGDI,ATF3,BAX,BIRC3,CA2,CAT,CD24,CDH3,CDKN1B,CLU,CXCL12,CYP2B6,DDAH1,DDIT3,DLGAP2,EAF2,EGF,FKBP5,FN1,G6PC,GHR,GSTA1,HSD3B2,HSPA5,IDO1,IGFBP4,LITAF,MLYCD,MMP9,NCF2,OAT,PCOLCE,PDGFRA,PKLR,PPARGC1A,PRKACB,PSMB8,RND3,SIRT2,SIRT3,SOD2,TJP1,TP53,VCAM1                                                                                                                                                                                                                                                                                                                                                                                                                                                                                                                                         |
| KDM5A     |        | transcription regulator | Activated | 4,314  | 4,258  | -0,009 | 7,40E-07 | 1,28E-05 | ACO2,ATP6V1D,BCKDHA,CCND1,CD55,CDKN1B,COL1A2,DLAT,D LST,DMPK,GADD45GIP1,GHITM,GRPEL1,HSPB1,LDH3B,MAP2K3,MCAT,MCM2,MCM3,MLYCD,MRPL58,MTOR,MYO2,NDUFA10,NDUF A2,NDUFA3,NDUFS2,NDUFS4,NDUFS7,NDUFV1,NIT1,NME1,OPA1,PGAM2,PMPCB,SDHB,SDHD,SOD2,TERT,TNNC1,TNNT2,TXN2,UQ CRC1                                                                                                                                                                                                                                                                                                                                                                                                                                                                                                                                        |
| CCND1     | -0,313 | transcription regulator | Activated | 2,352  | 2,362  | 0,001  | 7,84E-07 | 1,35E-05 | AHNAK,ALDH1A3,AQP3,ARMCX1,AURKA,AZGP1,BCLAF1,C7,CALU,CCNA2,CCND1,CCND2,CCND3,CD44,CDKN1B,CDKN2C,CEP55,CLPB,COL1A1,COL5A2,CTNNBIP1,DNMT1,DTL,DYNC1LI1,EIF5,EN O1,ENPP2,FGF7,FLNA,GNMT,HSPA8,HSPB8,IDO1,IDO1,ITGAV,ITGB3,ITGB6,JPT1,KIF20A,KRT10,KRT4,LIN7B,MACF1,MAFF,MAGI2,MARCKS,MCM7,MEIS2,MELK,MMP2,MNS1,MYO7A,PAH,PBLD,PCLAF,PCNA,PDCC4,PDLIM4,POLD3,PTPRC,RB1,RRM2,SEC22A,SELENBP1,SERINC3,SLC4A4,SOX4,SPP1,STXBP1,TCF4,TGFBR2,TIAM1,TM7SF2,TMPRSS2,TMSB15A,TOR3A,TP53,TP1,TPX2,TUBA1B,TUBB,TIJFM,IAP1,IISF1,IITRN,WVVOX,ZNF423                                                                                                                                                                                                                                                                            |
| KLF15     | -0,313 | transcription regulator | Inhibited | -3,413 | -3,380 | 0,007  | 8,45E-07 | 1,45E-05 | ACADL,ACADM,ACADS,ACADVL,ACAT1,ACOX1,ACSL1,CD36,CPT2,DECR1,EHHADH,ESRRG,HADHA,MLYCD,NPHS1,NPHS2,NPPA,PKK4,PPARGC1A,PXMP2,SCD,SLC25A20                                                                                                                                                                                                                                                                                                                                                                                                                                                                                                                                                                                                                                                                           |
| CBX5      | 0,177  | transcription regulator |           | -1,813 | -1,874 | -0,010 | 8,73E-07 | 1,49E-05 | AGR2,ALDH3A1,BCL11A,CD24,CKM,CYP1B1,CYP2J2,GASK1B,GCHFR,GCNT3,GDPD3,HBB,HOXB6,ICAM2,ITGA7,LCN2,LTB,LY6G6D,MMP7,MUC13,OAS1,PLAAT4,PSMB8,QPCT,QPRT,RIN2,RORA,SELENBP1,SERPINA3,SH3GL2,SLC2A10,SLC7A7,SLC7A8,TACSTD2,TF3,TGFB1,TM4SF1,TSPAN13,TSPAN8,TXNIP                                                                                                                                                                                                                                                                                                                                                                                                                                                                                                                                                         |

|                                               |        |                                   |           |        |        |        |          |          |                                                                                                                                                                                                                                                                                                                                                                                                                                                                                                                                                                                                                                                          |
|-----------------------------------------------|--------|-----------------------------------|-----------|--------|--------|--------|----------|----------|----------------------------------------------------------------------------------------------------------------------------------------------------------------------------------------------------------------------------------------------------------------------------------------------------------------------------------------------------------------------------------------------------------------------------------------------------------------------------------------------------------------------------------------------------------------------------------------------------------------------------------------------------------|
| NR3C2                                         | 0,108  | ligand-dependent nuclear receptor |           | 0,822  | 0,835  | 0,002  | 8,76E-07 | 1,49E-05 | ADAMTS1,APOE,ARPC2,BAX,BCL2A1,BID,CACNA2D3,CAT, COL1A1, COL3A1, CXCL6, CXCR4, CYFIP2, CYP1B1, DDC, ECHDC2, FKBP4, FKBPF, FN1, GHR, GPX3, GUCY1A1, HLA-DQB1, HMOX2, HSPA9, ICAM1, IDH3B, KLF9, LCN2, MMP1, MSRB1, NOX4, NPPA, PPIB, PRDX4, PROC, PTPRCAP, SERPINA3, SGK1, TACC2, TGFBI, TP53, VEGFA, VLDLR                                                                                                                                                                                                                                                                                                                                                |
| SUMO3                                         | 0,132  | other                             |           | -1,385 | -1,393 | -0,002 | 8,96E-07 | 1,52E-05 | BACE1, CAV1, CAV2, CCN3, CCND2, CD38, CD59, CTH, CXCL10, HLAG, HSPA8, ISG15, LAMP3, MOXD1, PNP, TAP1, TNC, TNFRSF21, XRCC5                                                                                                                                                                                                                                                                                                                                                                                                                                                                                                                               |
| RIPK2                                         |        | kinase                            |           | 1,360  | 1,392  | 0,006  | 9,03E-07 | 1,53E-05 | ACACA, ACADL, ACADM, ACOX1, ACSL1, CCL5, CD36, CD40, CD69, CD86, CXCL10, DGAT1, FABP1, ICAM1, IL33, MARCKSL1, MTTP, NOS2, NR1H3, PNPLA2, PPARA, PPARGC1A, PTGES, RALGDS, RASGRP1, SCD, SOD2, VCAM1                                                                                                                                                                                                                                                                                                                                                                                                                                                       |
| HRG                                           | -1,390 | other                             |           | 1,686  | 1,722  | 0,010  | 9,27E-07 | 1,57E-05 | ARF3, C1QA, C1QB, CD74, CD83, CXCL14, CXCR4, FCGR3A/FCGR3B, HLA-DQA1, MUC1, SPARC, SPP1, TIMP1                                                                                                                                                                                                                                                                                                                                                                                                                                                                                                                                                           |
| PTGS2                                         | 0,230  | enzyme                            | Activated | 2,532  | 2,563  | 0,005  | 9,49E-07 | 1,60E-05 | ANG, ANXA1, ANXA2, AQP1, BAX, BIRC3, CCL5, CCND1, CCR7, CD163, CD44, CDK5, CDKN1B, CDKN2C, CLU, CTSD, CTSK, CXCL10, CXCL12, CXCL14, CXCR4, CYP1B1, DUSP1, DYNLL1, ERBB3, ESRR, FN1, FOS, ICAM1, ID1, ITGAL, ITGAV, MMP1, MMP2, MMP7, MMP9, NOS2, PCNA, PL A2G4A, PTGER3, PTGS1, RAC1, RHOA, RPS19, SELL, ST3GAL1, TNFAIP6, TNFSF10, TP53, VEGFA, VEGFC                                                                                                                                                                                                                                                                                                   |
| RAC1                                          | 0,256  | enzyme                            |           | 0,695  | 0,729  | 0,007  | 9,53E-07 | 1,61E-05 | ACP5, APBB1, ATF3, BCL6, BID, CCND1, CD86, CKM, COL1A2, DPYSL2, DUSP1, ESR1, FAS, FN1, FOS, FOSL1, HIF1A, HOXA1, HSD11B2, ICAM1, IL13, IL33, IL6R, KIR3DL2, MAPK8, MMP1, MMP2, MMP9, NPPA, RAC1, RAC3, RHOA, SHC1, SOD2, STAT1, STAT3, VCAM1, VEGFA                                                                                                                                                                                                                                                                                                                                                                                                      |
| miR-199a-5p (and other miRNAs w/seed CCAGUGU) |        | mature microRNA                   | Inhibited | -3,552 | -3,603 | -0,010 | 9,62E-07 | 1,62E-05 | ALOX5AP, APOL1, C3, COL1A1, COL4A1, CSTB, DCN, DDR1, FN1, HIF1A, ID3, IFI27, ISG15, ITGA3, ITGB3, LCN2, MMP1, MMP7, MPP5, MX2, NEDD9, NFKB1, PIGR, RSAD2, SET, SMTN, TGFB2, TGFB3, TMPRSS2                                                                                                                                                                                                                                                                                                                                                                                                                                                               |
| cytokine                                      |        | group                             | Activated | 2,606  | 2,657  | 0,008  | 1,00E-06 | 1,68E-05 | ALOX5, ANG, BAX, CCL5, CCN3, CCND1, CCR7, CD27, CD40, CD69, CD86, CD93, CDKN1B, CISH, CLU, CXCL1, DDI3, DICER1, DUSP1, F3, FAS, FOS, HIF1A, ICAM1, IDO1, IRF1, MAPK8, MMP1, MMP2, MMP9, NGF, NOS2, PCNA, PLAAT4, S100A4, SELP, SGK1, SOCS2, SOD2, SPARC, STAT3, TIMP1, TLR2, TLR4, TNFAIP6, TNFRSF1B, VCAM1, VWF                                                                                                                                                                                                                                                                                                                                         |
| Irgm1                                         |        | other                             | Inhibited | -3,664 | -3,709 | -0,010 | 1,04E-06 | 1,74E-05 | CCL5, CCNA2, CCNB1, CCNB2, CXCL10, DTL, FAS, GINS1, ID2, ID3, IFI16, IFIT2, IFIT3, IRF7, KIF20A, OAS2, RRM2, RSAD2, SELP, SPAG5, UBE2C                                                                                                                                                                                                                                                                                                                                                                                                                                                                                                                   |
| CD28                                          |        | transmembrane receptor            |           | 0,788  | 0,845  | 0,006  | 1,07E-06 | 1,78E-05 | ACTR3, AHR, ANXA1, ARHGDI, BCL2A1, BHLHE40, BIN1, C2, CAMK2A, CASP3, CASP6, CASP8, CCND1, CCND2, CCND3, CCR5, CD247, CD27, CD69, CD86, CDKN1B, CISH, CXCR4, CYC1, DDX58, DUSP22, FCER1G, FOS, FYB1, FYN, GBP1, GBP2, GTF2IRD1, GTPBP4, GUCY1B1, GYS1, GZMA, GZMB, HAX1, HLA-DQB1, HSPA8, IFITM1, IFNGR1, IFRD2, IGFBP6, IL10RA, IL10RB, IL13, IL15RA, IL1R1, IL7, IL7R, IRF1, IRF8, ITGAL, LCP1, LSP1, MACROH2A1, MAFF, MAP3K10, MMP2, NAMPT, NCL, NFKB1, NR4A1, ORAI3, PCYOX1, PHB, PKLR, PLA2R1, PNP, PRDX4, PSMA6, PTEN, RNF128, RORA, RORC, RYK, SLC16A3, SLC25A5, SNRPB, SOCS2, SRGN, STAT3, TFP12, TNFRSF1B, TNFSF10, TOR1, TRIM24, TSC22D1, TSTA3 |
| IFNK                                          |        | cytokine                          | Activated | 2,684  | 2,714  | 0,009  | 1,11E-06 | 1,85E-05 | CD40, CD83, CD86, CXCL10, CXCL11, CXCL9, IFIH1, IRF1, MX1, OAS1, PLAAT4, STAT1, STAT4, TLR3                                                                                                                                                                                                                                                                                                                                                                                                                                                                                                                                                              |
| NOSTRIN                                       |        | transcription regulator           | Inhibited | -2,808 | -2,848 | -0,010 | 1,12E-06 | 1,86E-05 | ACE, ADAM17, ANXA5, CASP3, CAV1, CCL5, COL18A1, FGF1, FN1, ITGB3, MMP1, MMP2, MMP9, NFKB1, PECAM1, SELP, SOD1                                                                                                                                                                                                                                                                                                                                                                                                                                                                                                                                            |
| MYD88                                         | 0,260  | other                             | Activated | 5,053  | 5,125  | 0,009  | 1,16E-06 | 1,92E-05 | ACSL1, APOBEC3B, ATP6V1E1, ATR, C3, CASP4, CCL5, CD14, CD200, CD38, CD40, CD44, CD83, CD86, CISH, CLEC10A, CLIC4, CTSK, CXCL1, CXCL10, CXCL12, CXCL6, DUSP1, FANCF, FCER1G, FOS, FPR1, HCK, HIF1A, HLA-A, HSPA5, ICAM1, IFIT2, IFNA10, IL13, IL15, IL18, IL32, IL7, INPP5D, IRF1, IRF7, IRF8, ISG15, LPAR1, MAFF, MCM2, MET, MMP2, MMP7, MMP9, MRC1, MSH2, MSH3, NFKB1, NOD2, NOS2, PARP1, PILRA, PLA2G4A, PSTPI2, PTGES, RSAD2, S100A8, SAMHD1, SLC16A3, SLCO3A1, SPP1, TFE, TIMP1, TLR2, TSC22D1, VCAM1                                                                                                                                                |
| EBI3                                          | 0,197  | cytokine                          | Activated | 4,073  | 4,099  | 0,005  | 1,23E-06 | 2,03E-05 | B2M, CCND2, CCND3, CD86, FOS, GADD45G, GBP2, HLA-A, HLA-B, HLA-C, HLA-DMA, HLA-DMB, HLA-DOB, HLA-DPA1, HLA-DQA1, HLA-DRA, ICAM1, IL13, IRF1, MX1, RORC, STAT1, TAP1, TNFSF10                                                                                                                                                                                                                                                                                                                                                                                                                                                                             |
| KL                                            | -1,014 | enzyme                            |           | -0,534 | -0,546 | -0,003 | 1,25E-06 | 2,06E-05 | AXL, BAX, CAST, CCND1, CYBB, CYP27B1, CYP46A1, ICAM1, IHH, IRF7, KL, MMP7, MMP9, SELP, SLC34A1, SOD2, TNFRSF11B, TYRO3, VDR, VEGFA                                                                                                                                                                                                                                                                                                                                                                                                                                                                                                                       |
| DDX58                                         | 0,730  | enzyme                            | Activated | 2,955  | 2,998  | 0,009  | 1,27E-06 | 2,08E-05 | AHNAK, ALPL, CASP4, CCL5, CXCL10, DDX58, EGOT, IFI27, IFI35, IFI44, IFI1, IFIT2, IFIT3, IRF1, IRF7, IRF8, ISG15, ISG20, LTBP3, MAT2A, NFATC4, NMI, OAS1, RSAD2, SPP1, STAT1, TLR3, TNFSF10                                                                                                                                                                                                                                                                                                                                                                                                                                                               |

|                           |        |                                 |           |                 |                 |                |                      |                                                                                                                                                                                                                                                                                                                                                                                                                                                                                             |                                                                                                                                                                                                                                                                                                                                                                                                            |
|---------------------------|--------|---------------------------------|-----------|-----------------|-----------------|----------------|----------------------|---------------------------------------------------------------------------------------------------------------------------------------------------------------------------------------------------------------------------------------------------------------------------------------------------------------------------------------------------------------------------------------------------------------------------------------------------------------------------------------------|------------------------------------------------------------------------------------------------------------------------------------------------------------------------------------------------------------------------------------------------------------------------------------------------------------------------------------------------------------------------------------------------------------|
| Creb                      | group  |                                 | -0,426    | -0,389          | 0,005           | 1,27E-06       | 2,09E-05             | AASS,ADM,ALOX5,ARHGFE9,ARPC5,ATF3,BACE1,C3AR1,CASP1,CCND1,CD14,CD59,CGA,CIDEC,CLMN,COMT,COX6A2,CSF1R,CTH,CTSB,CTSV,CXCL10,CYP17A1,DUSP1,EIF4EBP2,FAS,FCER1G,FOS,FOSB,FOSL1,FSCN1,G6PC,GABRR2,GDPD3,GJA1,GNAS,GSTM4,HLA-G,HPGD,HSPB8,IFI16,INHA,ITGAM,KLRB1,KPTN,LTBP3,MAPK8,MA T2A,MCAM,MCM3,MIF,MMP1,MMP2,MYB,NDN,NDUFA3,NEDD9,NO X5,NR4A1,NR4A3,NRL,PCK1,PCNA,PCOLCE,PER1,PHTF1,PLIN3,POU2AF1,PPARGC1A,PPFIBP1,PRKCA,PSENE1,SLC25A44,SLIT2,SOX4,SST,SSTR2,TAC1,THAP1,TIA1,TNFRSF11B,VEGFA |                                                                                                                                                                                                                                                                                                                                                                                                            |
| MAP3K7                    | kinase |                                 | 1,284     | 1,307           | 0,004           | 1,38E-06       | 2,25E-05             | BIRC3,CCL20,CCL5,CCR7,CD14,CFB,CXCL10,CXCL6,DDX58,GBP1,GBP2,GCH1,IFI44,IFIH1,IFIT2,IFIT3,IFITM1,IRF1,IRF7,MAP2K3,MMP1,NFKB1,NKX2-5,NPPA,OAS2,RNASEL,SLPI,TERT,TNFSF10,XAF1                                                                                                                                                                                                                                                                                                                  |                                                                                                                                                                                                                                                                                                                                                                                                            |
| TFRC                      | -0,218 | transporter                     | -1,920    | -1,961          | -0,008          | 1,41E-06       | 2,29E-05             | ADGRG1,ANXA2,ATF3,BNIP3,CASP3,CCNA2,CCNB1,CD300A,CDK1,CSTF2T,DDIT3,FOS,FTL,GADD45A,GPX3,GPX7,HSPA5,ID2,ITGAM,ITGB2,LY75,ME1,MS4A6A,PFKFB3,PHGDH,PPP1R15A,STC2,TNFSF10,TP53,UBE2E1,XBP1                                                                                                                                                                                                                                                                                                      |                                                                                                                                                                                                                                                                                                                                                                                                            |
| PNPLA2                    | -0,199 | enzyme                          | Inhibited | -2,392          | -2,374          | 0,004          | 1,49E-06             | 2,41E-05                                                                                                                                                                                                                                                                                                                                                                                                                                                                                    | ACAA2,ACADL,ACADM,ACADVL,ACOX1,ACSL1,CD36,GSTK1,HSPA5,ICAM1,INSR,MTPP,PCK1,PDK4,PPARA,PPARGC1A,UBE2B,UCP2,ULK1                                                                                                                                                                                                                                                                                             |
| NRG1                      |        | growth factor                   | Activated | 2,123           | 2,147           | 0,004          | 1,50E-06             | 2,42E-05                                                                                                                                                                                                                                                                                                                                                                                                                                                                                    | ACAT1,ACTN1,BDH2,BIN1,BNIP3,CAPN1,CASP3,CAV1,CAVIN1,CCND1,CCND2,CCND3,CDKN1B,CDX2,CHRND,COL1A1,COL6A3,CXCL6,CXCR4,DDIT3,DUSP1,ENO3,ERBB3,ETFB,FGF1,FN1,FOS,FOSB,FSTL1,GAD1,GPER1,GPS2,GPX3,HIF1A,ID1,IDH3B,IDI1,ITGAM,ITGAV,ITGB3,JUND,MAF,MMP9,NDUFS1,NKX2-5,NPPA,NR4A1,NR4A3,NUP214,PCCB,PCDC4,PGAM2,PKLR,PLG,RAB3A,SGSH,SHBG,SLC1A1,SOX4,UTRN,VEGFA,VEGFC,VIM,ZFP36                                     |
| SMAD3                     |        | transcription regulator         |           | 0,353           | 0,393           | 0,006          | 1,53E-06             | 2,47E-05                                                                                                                                                                                                                                                                                                                                                                                                                                                                                    | ALB,APOA1,APOA4,APOC3,C3,CCND1,CCND2,CD59,CDH5,CKM,COL1A1,COL1A2,COL3A1,COL6A3,CXCL10,DDIT3,ENG,ESR1,F12,FN1,FOS,G6PC,GADD45B,GLS,GZMA,GZMB,HNF4A,HSP90B1,HSPA5,ID1,ID2,ID3,IL13,IL15,INHA,INPP5D,JAM2,JUND,LHB,LPAR1,LU M,MMP1,MMP9,NET1,NOS2,PC,PCNA,POR,PPARGC1A,PTPRK,RA C1,RHOB,S1PR1,SLC5A2,SMAD1,SMAD7,SPP1,SSTR2,STAT3,TE RT,TIMP1,TNC,TPM1,VEGFA,VEGFC,VIM,ZEB2,ZFP36                             |
| SFRP1                     | 0,575  | transmembrane receptor          | Inhibited | -2,635          | -2,630          | 0,001          | 1,57E-06             | 2,52E-05                                                                                                                                                                                                                                                                                                                                                                                                                                                                                    | ACACA,BACE1,BAX,CASP3,CCND1,CD24,COL1A1,ELOVL6,FN1,G6PC,MLXIPL,MMP1,MMP2,MMP9,NAMPT,NR1H3,PCK1,PRLR,SCD,SFRP1,SLC2A2,TP53,VIM                                                                                                                                                                                                                                                                              |
| Hbb-b2                    |        | other                           | Activated | 3,533           | 3,578           | 0,010          | 1,62E-06             | 2,60E-05                                                                                                                                                                                                                                                                                                                                                                                                                                                                                    | C1QA,CCR2,CCR5,CD44,CD74,CLEC7A,CXCL10,CYBA,CYBB,FN1,FTL,IL10RA,IL2RB,IL2RG,ITGAM,LTB,LY86,NCF2,PRLR,SERPINF2,TLR2                                                                                                                                                                                                                                                                                         |
| KDM1A                     |        | enzyme                          |           | 0,747           | 0,731           | -0,002         | 1,63E-06             | 2,61E-05                                                                                                                                                                                                                                                                                                                                                                                                                                                                                    | ADM,AFP,ARHGDI1,ARNTL2,ATP6V0E2,AZGP1,BCL7A,C1orf116,CC L5,CCNA2,CCND2,CDA,CENPU,CHN1,COL1A1,COL1A2,CRYM,CSGALNACT1,CXADR,CXCL10,CXCL9,DNMT1,ELL2,ENTPD4,FIP1L1,FOXO1,GLT8D2,GNMT,HBB,HOXB7,ID2,IGFBP4,IQGAP2,KCNAB2,LCK,MCM2,MCM3,MCM6,MPC2,MYO1B,NCL,PPP1R12A,PROM1,PS AT1,PTEN,PTTG1,RARG,RBFOX2,RIN1,SCD,SERPINB1,SFRP1,SM AD7,SOCS2,TERT,TM4SF1,ZNF165                                                |
| Pro-inflammatory Cytokine |        | group                           |           | 0,414           | 0,443           | 0,008          | 1,67E-06             | 2,66E-05                                                                                                                                                                                                                                                                                                                                                                                                                                                                                    | ABCC2,ADM,AKR1B1,APOE,ASS1,CCN3,CD47,CD55,CLU,F3,GCLC,GLUL,GSTA1,HDAC6,HSPA5,ICAM1,LCN2,LGALS1,MMP9,NFE2L2,NOS2,NR4A1,SELP,TIMP1,TLR2,UBD,VCAM1                                                                                                                                                                                                                                                            |
| Mmp E2F3                  | 0,109  | group transcription regulator   |           | -0,692<br>1,130 | -0,684<br>1,158 | 0,003<br>0,005 | 1,67E-06<br>1,71E-06 | 2,66E-05<br>2,71E-05                                                                                                                                                                                                                                                                                                                                                                                                                                                                        | AXL,CSF1R,DSG2,FAS,ITGAM,JAM2,MMP9,PLG,TJP1,VEGFA CAV2,CCL20,CCNA2,CCNB1,CCNB2,CCND1,CCND3,CD9,CDK1,C OL18A1,CSHL1,CXCL1,DEK,ECHDC2,EED,EZH2,FAM102A,FOXN1, HMGB2,ID3,JAM2,KRAS,LBR,MAD2L1,MCM2,MCM3,MCM5,MCM6,MC M7,MT1F,MT1G,MT1X,MYB,PCLAF,PCNA,PLCB4,PPP1R8,PTGER 3,PTTG1,RB1,RBPMS,RRM1,RRM2,S100A8,TERT,TNFAIP2,TP2B, TOPBP1,TP53BP2,TPX2,UBE2C,WFD2,ZNF76                                           |
| glutamine                 |        | chemical - endogenous mammalian |           | -0,248          | -0,265          | -0,003         | 1,73E-06             | 2,74E-05                                                                                                                                                                                                                                                                                                                                                                                                                                                                                    | ACTB,ADA,ASNS,ASS1,CCND1,COL1A1,CXCL1,DDIT3,DUSP1,FN1, FOS,GADD45A,GCDH,HIF1A,HK1,HSPB1,HSPA5,ICAM1,IDI1,IL15, IRF2,NR4A1,PCK1,PCK2,PCNA,PHB,PPARGC1A,PROM1,THBS2,TP53,VEGFA,VIM,WARS1,WT1,XBP1,ZMYND8                                                                                                                                                                                                     |
| Ca2+                      |        | chemical - endogenous mammalian |           | -0,244          | -0,204          | 0,005          | 1,76E-06             | 2,79E-05                                                                                                                                                                                                                                                                                                                                                                                                                                                                                    | AHR,ANKH,ARC,ATF3,CALR,CCND1,CCND2,CCND3,CCR2,CD83,CD86,CDKN1B,CGA,COL1A1,CUL9,CXCR4,CYP1B1,CYP27B1,DDIT3, DUSP1,FAAH,FN1,FOS,FOSL1,GJA1,GLS,GRK5,HOXA1,HSPA5,IC AM1,ID1,ID3,IL33,IL6R,IRF1,ITGA3,ITPR3,JUND,KRT10,LHB,MCAM, MGP,MMP9,MYB,NDRG1,NOX5,NPPA,NR4A1,NR4A3,NTRK2,PEBP 1,PER1,PLS3,PPARA,PPARGC1A,PTTG1,S100A8,S100A9,SELP,SGK1,SLC12A3,SPP1,SST,SSTR2,TAC1,TCF4,TIMP2,TLR4,UGCG,VCAM1,VDR,VEGFA |

|                                                        |                             |                                               |           |        |        |          |          |                                                                                                                                                                                                                                                                                                                                                                                  |                                                                                                                                                                                                                                                                                                                                                                                                                                    |
|--------------------------------------------------------|-----------------------------|-----------------------------------------------|-----------|--------|--------|----------|----------|----------------------------------------------------------------------------------------------------------------------------------------------------------------------------------------------------------------------------------------------------------------------------------------------------------------------------------------------------------------------------------|------------------------------------------------------------------------------------------------------------------------------------------------------------------------------------------------------------------------------------------------------------------------------------------------------------------------------------------------------------------------------------------------------------------------------------|
| miR-1-3p<br>(and other<br>miRNAs<br>w/seed<br>GGAAUGU) | mature<br>microRNA          | Inhibited                                     | -2,461    | -2,533 | -0,010 | 1,81E-06 | 2,86E-05 | ABHD11,ADAR,AGMAT,AGRN,ANP32B,ANXA2,ARF3,ARF4,ARHGA<br>P29,ATP6V1B2,AXL,BCKDHB,BLCAP,CAP1,CDCP1,CDK14,CERS2,<br>CLCN3,CNOT6,CORO1C,DHX15,DNAJB1,ESR1,FERMT2,FSTL1,GA<br>K,GCH1,GJA1,IIFT52,KCNJ2,KIF2A,LARP4,MET,MMD,MTHFD2,NEL<br>FCD,NETO2,NOTCH2,NRP1,OAT,PDCD4,PLEKHB2,PNP,PIIB,PTP<br>RF,SFXN1,SH3BGRL3,SHTN1,SLC25A1,TAC1,TAGLN2,TLCD3A,TM<br>SB10/TMSB4X.TPM1,UTRN.ZNF264 |                                                                                                                                                                                                                                                                                                                                                                                                                                    |
| RBL1                                                   | transcriptio<br>n regulator |                                               | -1,046    | -1,075 | -0,007 | 1,83E-06 | 2,89E-05 | CASP4,CASP6,CCNA2,CCND1,CDK1,CDKN1B,CRADD,F3,FAS,FO<br>S,FOXN1,KRT10,MCM2,MCM3,MCM5,MCM6,MCM7,MET,MT1G,MT<br>OR,PCNA,PPARGC1A,PPP1R8,RB1,RRM1,RRM2,SFRP1,TERT,TP<br>53                                                                                                                                                                                                           |                                                                                                                                                                                                                                                                                                                                                                                                                                    |
| ERBB3                                                  | -0,315                      | kinase                                        | 0,500     | 0,494  | -0,001 | 1,89E-06 | 2,97E-05 | ACTB,ADAM9,BAX,CCND1,CCND2,CD47,CDKN1B,CLU,COL1A1,CT<br>SK,CXCL12,CXCR4,DUSP1,EIF6,ERBB3,F3,FBN1,FN1,GHR,GZMH,<br>HIF1A,MXI1,PTEN,PTGS1,RRAS,SERPINA3,SFRP1,SLPI,SPARC,T<br>NC,USP14,VEGFA                                                                                                                                                                                       |                                                                                                                                                                                                                                                                                                                                                                                                                                    |
| HSPA5                                                  | 0,380                       | enzyme                                        | -1,082    | -1,069 | 0,003  | 1,99E-06 | 3,10E-05 | ACADM,ACADVL,BAX,BCL2L2,CASP3,CCL5,CD47,CLU,CXCL10,DD<br>IT3,ESR1,G6PC,HADHA,HSP90B1,HSPA5,HSPA8,IDI1,ISG15,P4HB,<br>PTEN,SCD,XBP1                                                                                                                                                                                                                                               |                                                                                                                                                                                                                                                                                                                                                                                                                                    |
| IFNE                                                   |                             | cytokine                                      | Activated | 3,135  | 3,171  | 0,009    | 1,99E-06 | 3,10E-05                                                                                                                                                                                                                                                                                                                                                                         | ANGPTL3,APOBEC3G,BST2,CD40,CD83,CD86,CXCL10,CXCL11,CX<br>CL9,HEXB,IFIH1,IFIT2,ISG15,ISG20,MX2,PLAAT4,STAT1,STAT4,TL<br>R3,TRIM5                                                                                                                                                                                                                                                                                                    |
| D-<br>galactosami<br>ne                                |                             | chemical -<br>endogeno<br>us<br>mammalia<br>n |           | 1,546  | 1,583  | 0,008    | 1,99E-06 | 3,10E-05                                                                                                                                                                                                                                                                                                                                                                         | ALB,BAX,CASP1,CASP8,CD14,CTSB,CXCL10,FOS,GPT,ICAM1,IL18<br>,IL33,JUND,NFE2L2,NOS2,SDC3,SOD2,TIMP1,TLR4,TNFSF10                                                                                                                                                                                                                                                                                                                     |
| VHL                                                    |                             | transcriptio<br>n regulator                   |           | 0,272  | 0,255  | -0,004   | 2,30E-06 | 3,57E-05                                                                                                                                                                                                                                                                                                                                                                         | ADGRG1,BHLHE40,BNIP3,CAV1,CCND1,CDCP1,CDKN1B,CDKN1C<br>,CPT2,CXCL12,CXCR4,DAB2,DECR1,EIF5,F3,FN1,FTL,GAL3ST1,HI<br>F1A,HNF1A,HYAL1,MAD2L1,MAF,MIF,MXI1,NEDD9,NOX4,PCNA,PF<br>KFB3,QPRT,RHOF,SEC61G,SLC16A3,SLC1A3,SOD2,SPARC,TMED<br>3,TNFSF10,TP53,VCAM1,VEGFA,VEGFC,VIM                                                                                                                                                          |
| FANCC                                                  | -0,126                      | other                                         |           | -0,202 | -0,213 | -0,004   | 2,33E-06 | 3,61E-05                                                                                                                                                                                                                                                                                                                                                                         | ANKRD6,CDK1,CXCL12,FHL2,FZD2,FZD4,FZD6,HHEX,HNF1B,IFI44<br>L,IL1R1,MMP7,MX1,MYOF,NOS2,NUAK1,OAS1,OAT,PTPRC,RLN2,<br>RND3,SFRP1,SKAP2,TACSTD2,TBC1D9,TOM1L1,TP53                                                                                                                                                                                                                                                                    |
| cholecalcife<br>rol                                    |                             | chemical -<br>endogeno<br>us<br>mammalia<br>n | Activated | 3,200  | 3,232  | 0,005    | 2,43E-06 | 3,75E-05                                                                                                                                                                                                                                                                                                                                                                         | ADGRG1,ALOX5,ANXA2,CCL18,CCL5,CD14,CD300A,CD38,CD40,C<br>D83,CD86,CDA,CDKN1B,COL1A1,CSTF2T,CTSK,CXCL10,FOS,ITG<br>AM,ITGB2,LY75,ME1,MS4A6A,NDUFAP4,NR0B2,PDGFRA,PRKX,PT<br>H1R,PVALB,RB1,RORC,RUNX3,SPP1,TGFBR2,TNFRSF11B,TNFSF<br>10,UBE2E1,VDR,WT1                                                                                                                                                                               |
| TCL1A                                                  |                             | transcriptio<br>n regulator                   | Activated | 2,184  | 2,200  | 0,007    | 2,51E-06 | 3,86E-05                                                                                                                                                                                                                                                                                                                                                                         | C1QA,C1QB,C3AR1,CPA3,CTSB,CTSD,CTSS,CYBB,FCER1G,FCG<br>R2B,FKBP5,FOS,FPR1,GPNMB,IGSF6,ITGAM,ITGB2,LCN2,LTF,MA<br>FB,MAN2C1,MMP9,NETO2,NEU1,S100A8,S100A9,SLC15A3,STEAP<br>4,TLR7,TNFAIP2,TREM2,UTRN                                                                                                                                                                                                                                |
| DUSP1                                                  | -1,149                      | phosphata<br>se                               |           | 0,843  | 0,839  | -0,001   | 2,58E-06 | 3,95E-05                                                                                                                                                                                                                                                                                                                                                                         | CCL20,CD40,CD86,CFB,CGA,CIDEA,CLEC10A,COL3A1,CXCL1,CX<br>CL10,CYBB,CYP17A1,DUSP1,FOSL1,ICAM1,IFIT3,IRF1,ISG20,LHB,<br>LTF,LUM,MMP1,MRC1,MX1,NOS2,NRP1,PLIN2,PTEN,PTPRK,RETS<br>AT,S100A9,SOD2,SPRYD7,TLR2,UBD,VCAM1,VEGFC,ZFP36                                                                                                                                                                                                    |
| MAP2K4                                                 | -0,074                      | kinase                                        |           | 1,067  | 1,103  | 0,009    | 2,63E-06 | 4,01E-05                                                                                                                                                                                                                                                                                                                                                                         | ATF3,BIRC3,CCL5,CCND1,CD44,CD86,CXCL10,FAS,FLNA,FOS,GA<br>DD45A,KIF2A,MAPK8,MEF2C,MMP1,NOS2,NPPA,PAK2,PLA2G4A,R<br>OCK1,STAT3,TP53,TUBB2A,VDR                                                                                                                                                                                                                                                                                      |
| NOTCH1                                                 |                             | transcriptio<br>n regulator                   |           | 1,790  | 1,801  | 0,001    | 2,67E-06 | 4,06E-05                                                                                                                                                                                                                                                                                                                                                                         | AQP3,BCL6,BIRC2,BIRC3,CCND1,CCND2,CCND3,CD14,CD44,CD8<br>4,CDKN1B,CDKN1C,CFD,CKM,COL1A1,COL1A2,CSF1R,CSF2RB,C<br>XCL1,DLD,ECHS1,ECT2,EFNB2,ERBB3,ESM1,FCER1G,FCGR2B,F<br>OS,FOSB,FOSL1,G6PC,GLS,GLUD1,GRN,GYPA,HIF1A,HSPA8,ICA<br>M1,ID1,ID2,IFI16,IGFBP4,IL18,IL7R,IRF1,IRF8,ITGAM,MCAM,MMP1,<br>MMP2,NCF4,NDUFS1,NFKB1,NOS2,NR2F2,OAT,PDIA3,PTEN,PTP<br>RK,RB1,RND3,RORC,RUNX3,SPP1,SPRY2,TFF3,TGFBR2,TGFBR3,<br>TP53,TUG1,VEGFA |
| thyroid<br>hormone                                     |                             | chemical -<br>endogeno<br>us<br>mammalia<br>n | Inhibited | -2,974 | -2,975 | -0,000   | 2,68E-06 | 4,07E-05                                                                                                                                                                                                                                                                                                                                                                         | ABCG1,ACE,ACSL5,AFP,ALDOB,APOA4,APOE,CCNA2,CCND1,CD<br>2,CDKN1B,COMT,CPE,CRAT,DDAH1,DDC,ECH1,EGF,FOS,FZD6,G<br>6PC,GCH1,GHR,HR,IDI1,IGFBP4,IGHM,INHA,IRF2,KLF9,ME1,NPPA,<br>NR1H2,NTRK2,OAT,OXT,PCK1,PER1,PHYH,PIP4K2A,PKLR,PPARA<br>,PTEN,RYK,S100A10,SERPINE2,SSRP1,SST,ST14,STAT1,THRB,U<br>CP2,VIM,YWHAE                                                                                                                       |
| HOXA9                                                  |                             | transcriptio<br>n regulator                   |           | 1,804  | 1,825  | 0,005    | 2,74E-06 | 4,16E-05                                                                                                                                                                                                                                                                                                                                                                         | ADD3,ADGRG1,ARPC5,BCL7A,CALB1,CALCRL,CBX6,CD36,CD93,<br>CEL2F,CISH,CLCN7,CLIC2,CSNK1A1,CTH,CYBB,DLGAP5,FCGRT,<br>FZD5,GLI3,GLRX,GPR183,HOXB2,ID2,IL7R,INPPL1,LY86,LYN,LYZ,<br>MAFB,MAN2A2,MYB,OSBPL8,PCDH1,PPP1R16B,PRKD3,PTPRC,P<br>TPRCAP,RAB31,RDX,RPP40,S100A8,SDCBP,SERPINB9,SOX4,SP<br>P1,ST13,TSC22D1,USP1,VIM,WNT10B,ZNF22                                                                                                 |
| EIF2AK3                                                | -0,056                      | kinase                                        |           | -0,379 | -0,344 | 0,008    | 2,87E-06 | 4,33E-05                                                                                                                                                                                                                                                                                                                                                                         | ALDH18A1,ANG,ASNS,ATF3,BIRC2,BIRC3,CCL20,CCND1,CLCN3,C<br>YB5R1,DDIT3,DNAJB9,FOSL1,GADD45A,GCH1,HSPA5,HSPA9,LO<br>NP1,MECR,NDRG1,NFIL3,NOS2,PCK2,PON2,PPP1R15A,RNASEL,<br>SHMT2,SNW1,TARS1,TP53,TXNIP,UIMC1,VEGFA,WARS1,XBP1,ZF<br>P36                                                                                                                                                                                             |

|              |        |                                 |        |        |        |          |          |                                                                                                                                                                                                                                                                                                                                                                                                                                                                                                                                                                                                                |
|--------------|--------|---------------------------------|--------|--------|--------|----------|----------|----------------------------------------------------------------------------------------------------------------------------------------------------------------------------------------------------------------------------------------------------------------------------------------------------------------------------------------------------------------------------------------------------------------------------------------------------------------------------------------------------------------------------------------------------------------------------------------------------------------|
| PRKCD        | -0,442 | kinase                          | 1,743  | 1,777  | 0,005  | 2,87E-06 | 4,33E-05 | APOBEC3A, ARHGAP32, BCL2A1, BIRC2, BIRC3, BNIP3, CCL20, CCL5, CCNA2, CCND1, COL1A1, COL1A2, CTSS, CXCL10, CXCL12, DDIT3, FB N1, FOS, FOSL1, HRH1, ICAM1, IL13, IL2RG, IL32, ITGAM, ITPR3, JCHAIN, MMP2, MMP9, NOCT, NOS2, NOTCH2, NR0B2, NR4A1, OAS1, PDCC4, PLAGL2, PLSCR1, PPP1R15A, PROM1, PTPN6, RCAN1, SIK3, SLC22A1, SPRY1, STAT3, TLR2, TNFRSF11B, TP53, TPBG, TUBB2A, UGCG, VCA M1, VEGFA, ZFP36                                                                                                                                                                                                       |
| RHO          |        | G-protein coupled receptor      | -1,922 | -1,914 | 0,002  | 2,88E-06 | 4,33E-05 | ACADM, AQP1, B2M, C1QA, CACNB2, CASP3, CD44, CD74, COL1A2, CR ABP1, CSF1R, CTSS, DDIT3, FOS, GNB1, HCLS1, HMGB2, IMPDH1, MEF 2C, PCOLCE, PDE6A, PLA2G7, S100A6, SERPING1, SGK1                                                                                                                                                                                                                                                                                                                                                                                                                                 |
| MEF2D        |        | transcription regulator         | -0,982 | -0,959 | 0,005  | 2,88E-06 | 4,33E-05 | BACH2, BCL2L2, CCND1, CCND3, CKM, COL1A2, COL3A1, FN1, FOS, F OSB, JUND, MCM3, MCM5, MCM6, NPPA, NR4A1, PCNA, PPARA, PPAR GC1A, PTEN, SYK, TNNC1, TNN1, VIM, ZFP36                                                                                                                                                                                                                                                                                                                                                                                                                                             |
| N-cor        |        | group                           | 0,832  | 0,801  | -0,008 | 3,00E-06 | 4,51E-05 | ACACA, ACACB, ACSL1, ASAP1, BIN1, C1QA, CCL5, CCND1, CD36, CID EC, CSHL1, CTSS, CXCL10, CXCL14, DHRS3, ELOVL6, ESR1, FO LR1, GSTP1, IDH1, INPP4B, LHPP, MCTP1, MGA, MMP2, MMP9, PCK1, P LIN2, RHOB, SCD, SEMA4D, SGK1, TBX2, WIPF1                                                                                                                                                                                                                                                                                                                                                                             |
| PARP1        | 0,295  | enzyme                          | 0,826  | 0,855  | 0,005  | 3,07E-06 | 4,60E-05 | BAX, CASP4, CCL5, CCND1, COL3A1, CXCL1, CXCL10, CXCL12, DNAJ C12, FAS, FKBP5, FOS, GBP2, HRH1, ICAM1, ITGAL, KRAS, LGALS3BP, MMP2, MMP9, NAT1, NOS2, PARP1, PVALB, RB1, REG1A, RPA1, SELP, SH3BP2, SOCS2, STAT1, TIMP2, TLR1, TLR4, TMPRSS2, TMSB15A, TP 53, VCAM1, VEGFC                                                                                                                                                                                                                                                                                                                                      |
| CEBPD        | -0,369 | transcription regulator         | 0,450  | 0,474  | 0,005  | 3,12E-06 | 4,66E-05 | ALB, ALOX5AP, APOC3, ASNS, BCL2A1, C3, CCL20, CCNB1, CCNB2, C CND1, CD14, CDKN1B, CDKN1C, CLU, CSF1R, CTSV, CXCL1, CXCR4, C YP2A6 (includes                                                                                                                                                                                                                                                                                                                                                                                                                                                                    |
| PDLIM2       | -0,527 | other                           | -0,111 | -0,115 | -0,001 | 3,23E-06 | 4,81E-05 | others), DDIT3, FOS, HIF1A, ITGAM, NGF, NOS2, PDGFRA, RB1, SLC5A1 2, TLR8, TNFAIP6, TP53, VEGFC, VLDLR, XBP1                                                                                                                                                                                                                                                                                                                                                                                                                                                                                                   |
| EGR2         | -0,321 | transcription regulator         | -0,166 | -0,113 | 0,008  | 3,38E-06 | 5,01E-05 | BST1, CCL20, CCND1, ENPP2, F2RL1, FBP1, FOXRED2, FSTL1, GHR, H LA- DOB, IFI44, IFIT3, IL7, KCTD12, KYNU, LGALS3BP, MECOM, MME, MPZL 2, NPR3, OAS3, PCSK1N, PDLIM2, PHLDA3, RNF128, SH3GL2, SLC43A 3, STAT1, STAT4, STC2, TNS1, TXNIP, WWOX                                                                                                                                                                                                                                                                                                                                                                     |
| CDH1         | 0,218  | other                           | -0,987 | -0,982 | 0,001  | 3,40E-06 | 5,01E-05 | ABCC1, ASS1, BCL6, BHLHE40, BNIP3L, CAST, CDH6, CRABP1, CSF1R, DDN, DHCR7, DLG3, EIF5B, FOS, GHR, GJB1, HSPA5, ID2, ID3, IL6R, IL7 R, KITLG, LHB, MME, MR1, MYB, NAB2, NCL, NSF, NUP54, PLCL1, PMP22, PPT2, PRKCD, PRX, ROBO1, RORA, RORC, SCD, SLC12A2, SLC1A3, S MAD1, TGFB3, TNFSF10, TOP2B, TXNRD2, VEGFA, ZEB2                                                                                                                                                                                                                                                                                            |
| CLEC11A      |        | growth factor                   | 2,204  | 2,219  | 0,006  | 3,40E-06 | 5,01E-05 | ACTB, APOA4, BIRC2, BMP7, CCND1, CD44, CDH3, ERBB3, FABP2, FN1, FOSL1, HOXA1, IFI27, IFITM1, IL13, ITGB3, KRT19, KRT7, LCN2, MCAM, MMP1, MMP9, MTOR, PFKFB3, PTEN, S100A4, TPBG, VEGFA, VIM, XPC                                                                                                                                                                                                                                                                                                                                                                                                               |
| TAL1         |        | transcription regulator         | -0,351 | -0,349 | 0,000  | 3,59E-06 | 5,26E-05 | ALOX5, ALOX5AP, ANXA1, CAP1, CCR5, CD74, CPA3, CXCL12, CYP17A 1, FHL2, FOS, GNB2, IL13, MIF, NFKB1, NR4A1, PMP22, S100A6, SLP1, ST AT4, TAC1, TKT, TSC22D1                                                                                                                                                                                                                                                                                                                                                                                                                                                     |
| mir-223      |        | microRNA                        | 0,835  | 0,847  | 0,002  | 3,84E-06 | 5,62E-05 | ACOT8, ADGRG1, ARAF, ARSA, AZGP1, BCL6, BHMT2, C3, C3AR1, CCN B1, CD69, CDH5, CDKN3, CENPU, CIB2, DSG2, FBN1, FCER1A, GALNT7, GINS1, GUCY1A1, GYPA, HADHA, HBB, HLA-A, HLA-B, HLA-C, HLA- E, HLA- F, HMGB3, HSD17B14, ICAM1, ID2, IL10RA, KIF20A, MAP3K1, MARCKS, MCM2, MCTP1, MELK, MUC1, MYB, NDN, NFKB1, NR4A3, OIP5, OXR1, P LEKHO1, PRSS8, PTDSS1, PTPRCAP, RBM7, RNASE6, SOX4, SPRY2, SYK, TNFSF10, TOB1, TOX, TSPAN7, TUBB4B, USP34                                                                                                                                                                     |
| nitric oxide |        | chemical - endogenous mammalian | -1,307 | -1,286 | 0,004  | 4,09E-06 | 5,98E-05 | BST1, C7, CA4, CD180, CD36, CD93, CYB5A, DNAJC6, EGF, FCER1A, FG L2, GASK1B, GFPT1, GPR65, HLA- DOB, HPGDS, ICAM1, ID2, IFI16, INPP5J, LY96, MEF2C, MMP25, MSMO1, MUC13, MYOF, PARP1, POSTN, RAB38, S100A6, S100A9, SGPL1, SLC 16A7, SLC29A1, SOAT1, SP3, STAT3, STMN1, TGFB1, TLR4, TLR7, TOB1                                                                                                                                                                                                                                                                                                                |
| TCF7L2       |        | transcription regulator         | 0,850  | 0,928  | 0,009  | 4,19E-06 | 6,11E-05 | ACE, AHR, ATF3, AVP, BAX, BIRC2, BNIP3, CCND1, CCNG1, CD44, CDK N1B, CXCL10, CXCL12, DDIT3, DUSP1, FAS, FGF7, FOS, GADD45A, GC LC, GCLM, GSTP1, HPGDS, HPRT1, IDO1, IL18, IL7R, MMP2, MMP9, NDR G1, NFE2L2, NOS2, PDIA4, PECAM1, PPARGC1A, PPM1D, PTGS1, RHB DF2, SFN, SGK1, SLC16A4, SOD1, SPP1, TIMP2, TP53, UBE2C, VEGFA, WT1                                                                                                                                                                                                                                                                               |
|              |        |                                 |        |        |        |          |          | ABHD17B, ACAA1, ACADL, ACSL1, ADGRG1, ALDH3A2, ALOX5, ANXA 1, AQP3, ARAP2, ARHGEF10, ASPA, BACE1, BIN1, CAMK2N1, CAP1, CA RHSP1, CCND1, CCND2, CD24, CDKN1B, CERS2, CPD, CREB5, CYP2C 8, CYP3A7, DDC, DOCK10, EHHADH, ENPP2, ENTDP5, ERBB3, ERF, EV I2A, EVI2B, FBP1, FH, G6PC, GCLM, GJB1, GLUL, GSS, HMGS2, ID1, ID2, ID3, IDH1, IPO13, KLHL2, MAL, MAP4K4, MAP7, MCAM, ME1, MMP1, MM P7, MTMR6, NINJ2, PAPSS1, PCK1, PIP4K2A, PPARGC1A, PPP1R16B, PROP1, PRRG1, RAB31, RALGDS, RHOA, RHOG, ROCK1, SC5D, SEMA 4D, SIRT2, SLC12A2, SLC27A2, SMAD7, SORBS3, SPP1, STK17B, STK3 9 TMFM123, TNS1, TSPAN15, VEGFA |

|                                                 |                                 |                                 |           |        |        |          |          |                                                                                                                                                                                                                |                                                                                                                                                                                                                                                                                                                                                                                         |
|-------------------------------------------------|---------------------------------|---------------------------------|-----------|--------|--------|----------|----------|----------------------------------------------------------------------------------------------------------------------------------------------------------------------------------------------------------------|-----------------------------------------------------------------------------------------------------------------------------------------------------------------------------------------------------------------------------------------------------------------------------------------------------------------------------------------------------------------------------------------|
| miR-29b-3p<br>(and other miRNAs w/seed AGCACCA) | mature microRNA                 | Inhibited                       | -3,542    | -3,591 | -0,010 | 4,29E-06 | 6,21E-05 | BACE1,CAV2,CCND1,CNOT8,COL15A1,COL1A1,COL1A2,COL3A1,COL4A1,COL4A2,COL5A2,DGP2,FBN1,FRAT2,GMFB,HMG3,LAMC1,NASP,PMP22,PPIC,PPM1D,PTEN,SPARC,TP53,TUBB2A,VEGFA                                                    |                                                                                                                                                                                                                                                                                                                                                                                         |
| sodium chloride                                 | chemical - endogenous mammalian |                                 | 0,664     | 0,703  | 0,008  | 4,29E-06 | 6,21E-05 | ACE,ADRA2A,AKR1B1,AQP1,AVP,CALB1,CASP3,CCL5,CYBA,CYBB,FOS,HIF1A,ICAM1,MAPK8,MPDZ,NOS2,NOX4,NPPA,NPY1R,OXT,PTGES,SLC12A3,SOD1,SPP1,TRPV5,VWF                                                                    |                                                                                                                                                                                                                                                                                                                                                                                         |
| TGFB2                                           | growth factor                   |                                 | 0,654     | 0,676  | 0,004  | 4,41E-06 | 6,36E-05 | AHR,BHLHE40,CD36,CD40,CD59,CD86,CDH11,CDH5,COL1A1,COL1A2,COL3A1,COL4A1,FAS,FN1,FOS,JAM2,MLLT3,MMP2,MMP9,NGF,NOS2,PDK4,PECAM1,PLOD2,PTEN,S100A8,SCD,SELL,SMAD2,SPP1,TGFBR3,TIMP1,TIMP2,TNFRSF11B,VCAN,VDR,VEGFA |                                                                                                                                                                                                                                                                                                                                                                                         |
| MAP2K3                                          | -0,419                          | kinase                          | 0,238     | 0,276  | 0,009  | 4,44E-06 | 6,39E-05 | ARG2,BAX,CCL8,CDKN1B,COL1A1,COL1A2,COL3A1,CTSK,CXCL10,CXCL9,DDIT3,GSTP1,ICAM1,IRF9,ISG15,MAOB,MMP1,MMP9,NOS2,NPPA,PPARGC1A,RGS7,SGK1,SLC1A3,STAT1,TNFSF10,VEGFA                                                |                                                                                                                                                                                                                                                                                                                                                                                         |
| IL7                                             | 0,492                           | cytokine                        | Activated | 2,425  | 2,465  | 0,007    | 4,48E-06 | 6,44E-05                                                                                                                                                                                                       | AHR,BAX,BLNK,CASP3,CCND2,CCND3,CD2,CD247,CD3D,CD3G,CD69,CD86,CD8A,CDKN1B,CISH,COL1A1,CTSK,CXCL1,CXCR4,DARS2,DPP4,FAS,FN1,FOXO1,GARS1,GSR,IGHM,IL13,IL1R1,IL7,IL7R,LTB,LYN,MAF,MLLT3,MMP9,MX1,PIK3IP1,RORC,S1PR1,SELL,SMAD7,SYK,TNFSF10,XBP1                                                                                                                                             |
| IL17A                                           |                                 | cytokine                        | Activated | 4,433  | 4,489  | 0,007    | 4,69E-06 | 6,72E-05                                                                                                                                                                                                       | ACTB,BCL2A1,C3,CCL20,CCL5,CCND1,CD14,CD163,CD40,CD83,COL1A1,COTL1,CTSK,CXCL1,CXCL10,CXCL12,CXCL6,CXCR4,ECHS1,FAS,FMO1,FOS,FOSL1,GADD45A,GBP2,HEXB,HSPB8,ICAM1,IL13,IL32,IL33,ISG15,LCN2,MAP2K3,MAP3K1,MLXIPL,MMP1,MMP2,MMP9,MRC1,NOS2,NRP1,OSMR,PECAM1,PPARA,S100A8,S100A9,SELP,SPSB1,STAT3,STEAP4,TGFBR2,TIMP1,TIMP2,TLR2,TLR3,TLR4,TNC,TNFRSF11B,TNFRSF1B,TNNC1,VCAM1,VEGFA,VEGFC,VWF |
| SMAD4                                           |                                 | transcription regulator         |           | -0,248 | -0,223 | 0,004    | 4,69E-06 | 6,72E-05                                                                                                                                                                                                       | ACKR1,AFP,AGR2,AIM2,APOA1,APOA4,APOC3,BMP7,CBFB,CCL20,CCND1,CCND2,CDH3,CDH5,CDKN1B,CELF2,COL1A2,CTSD,CYP17A1,ENG,FGFR3,FN1,FOS,FSCN1,GADD45A,GADD45B,GJA1,HHEX,HNF4A,ICAM1,ID1,ID2,IHH,INPP5D,JAM2,LEMD3,LOC102724788/PRODH,LPAR1,MET,MMP1,MTOR,NAMPT,NKX2-5,OVOL1,PGRMC2,PILRA,POR,PTEN,PTPRC,PTPRK,RAC1,RUNX3,SAE1,SCD,SGK1,SMAD2,SMAD7,SSTR2,TIMP1,TNC,TNFAIP6,TPM1,VEGFA,VIM,ZFP36  |
| EBF1                                            |                                 | transcription regulator         | Activated | 2,149  | 2,188  | 0,007    | 4,75E-06 | 6,80E-05                                                                                                                                                                                                       | ACACB,ARAF,BCL6,CCL5,CHUK,COL1A1,CRABP1,CXCL10,CXCL12,ESR1,FOXO1,G6PC,GYS1,IGHM,IGKC,INPP5D,INPL1,INSR,IRF1,IRF7,KLRB1,KRAS,MAPK10,MAPK8,MTOR,MYD88,NFIL3,PCK2,PFKP,PHKA2,PIK3R3,POSTN,PPARGC1A,PPP1R3C,PRKAG2,PTPRF,PYGB,SCD,STAT1,TLR2,TLR3,TLR4                                                                                                                                      |
| TXNIP                                           | 0,648                           | other                           |           | 1,263  | 1,261  | -0,000   | 4,78E-06 | 6,83E-05                                                                                                                                                                                                       | BCL6,CCNA2,CCND1,CD36,CDKN1B,COL1A2,DHCR7,FABP2,G0S2,ICAM1,IL2RB,MTTP,NFKB1,NOX4,NPHS2,PCNA,PPARA,PPARGC1A,TXNIP,VEGFA                                                                                                                                                                                                                                                                  |
| bisphenol A                                     |                                 | chemical - endogenous mammalian |           | 1,120  | 1,158  | 0,006    | 4,95E-06 | 7,06E-05                                                                                                                                                                                                       | ALDH5A1,APEH,ARNT2,BAX,C3,CASP3,CDKN1B,CFD,CLU,CTSD,CXCL10,CXCL12,DNM1L,ENO1,ESR1,FABP2,FOS,GPER1,HOXA10,HSP90B1,LCN2,LCP2,MAOA,MDH2,MMP9,NR4A1,NR4A3,OXT,PCNA,PEBP1,PKM,POSTN,PPP1R10,PRDX2,RBM22,RBM4B,RBPMS,RPN2,SLC1A5,SLC22A6,SLFN12,SPG21,SRD5A2,STAT3,STK17B,TP53,TRA2A,TWF2                                                                                                     |
| diacylglycerol                                  |                                 | chemical - endogenous mammalian |           | -0,469 | -0,447 | 0,010    | 5,02E-06 | 7,14E-05                                                                                                                                                                                                       | ACADM,ACOX1,CD36,FABP1,PRKCA,PRKCD,PRKCH,PRKCQ,RASGRP1,UCP2                                                                                                                                                                                                                                                                                                                             |
| CYP1A1                                          | -0,018                          | enzyme                          |           | -0,265 | -0,262 | 0,001    | 5,21E-06 | 7,39E-05                                                                                                                                                                                                       | ACOT11,ANXA3,ANXA4,ARAF,CBX3,CCND1,CHP1,CNN2,CYP17A1,CYP2B6,ECI2,GAMT,GPT,GSTA1,KIF2A,KITLG,KRT19,KRT7,MAPT,MID1,NDUFV1,PTP4A1,SDC1,SDHB,SHANK2,SMARCA4,SMTN,SOCS2,SPAG9,ST3GAL4,TACC3,TNNT2,TSC22D1,VLDLR                                                                                                                                                                              |
| TNFSF10                                         | 0,956                           | cytokine                        | Activated | 3,287  | 3,296  | 0,002    | 5,21E-06 | 7,39E-05                                                                                                                                                                                                       | BAX,BID,BIRC2,BIRC3,CASP3,CASP8,CD14,CD69,CSE1L,CTSB,CXCR4,FOS,HLA-A,HLA-C,HLA-F,IFI16,IFI27,IFI6,IFITM1,IFITM2,IL13,IRF9,ISG15,ITGAM,MMP2,MMP9,PCNA,RCAN1,STAT1,TIMP1,TNFAIP2,TNFSF10,TP53,VEGFA                                                                                                                                                                                       |
| TLR7                                            | 0,469                           | transmembrane receptor          | Activated | 5,194  | 5,260  | 0,010    | 5,29E-06 | 7,50E-05                                                                                                                                                                                                       | ATF3,BANK1,BCL2A1,CCL20,CCL5,CCNB1,CCND1,CCND3,CCR7,CD1D,CD300A,CD38,CD40,CD44,CD69,CD83,CD86,CDKN1B,CFH,CREB5,CXCL1,CXCL10,CXCL9,ESM1,FCER1G,FCMR,FOSL1,ICAM1,IDO1,IFI35,IFI44,IFI44L,IFIT3,IFITM1,IFNA10,IL10RA,IL13,IL1R1,INPP5D,IRF1,IRF7,IRF9,ISG15,ISG20,MX1,MX2,MYD88,NCF4,NFKB1,OAS2,OAS3,PHF11,PTPN6,RSAD2,SLC12A3,SOD2,STAT1,TLR7,TP53,TRIM38                                 |

|                 |        |                                   |           |        |        |        |          |          |                                                                                                                                                                                                                                                                                                                                                                                                                                                                                                                                                                                                                                                                                    |
|-----------------|--------|-----------------------------------|-----------|--------|--------|--------|----------|----------|------------------------------------------------------------------------------------------------------------------------------------------------------------------------------------------------------------------------------------------------------------------------------------------------------------------------------------------------------------------------------------------------------------------------------------------------------------------------------------------------------------------------------------------------------------------------------------------------------------------------------------------------------------------------------------|
| SOX11           |        | transcription regulator           |           | 0,467  | 0,493  | 0,005  | 5,45E-06 | 7,70E-05 | ADAM10,ADAM9,BCL7A,BST2,CASP6,CAV1,CCL5,CCND1,CD24,CD52,CD58,CD86,CD9,CNOT6,CUL1,CXCR4,DBN1,FAS,FCMR,HMG B3,IFIH1,LCK,MAPK8,MS4A1,MYO1B,NIPSNAP1,SKAP2,SMAD1,STAT1,TFDP2,TIAM1,TMSB15A,TUBA1A                                                                                                                                                                                                                                                                                                                                                                                                                                                                                      |
| SNAI1           | -0,052 | transcription regulator           |           | 0,464  | 0,458  | -0,001 | 5,46E-06 | 7,71E-05 | ACTN1,ACTR2,ACTR3,AXL,CCND1,CCND2,CCND3,CD55,CDC25B,CDH5,CLDN1,CLDN3,COL1A1,COL1A2,CXADR,ELF4,FLNA,FN1,FOS,FOSL1,HNF4A,HPGD,ID1,INHA,ITGA2,LIMA1,MLXIPL,MMP9,MUC1,PEBP1,PFKP,PTEN,RAB25,SDC1,SLC27A2,SLC29A1,SMAD7,SPARC,TGFBR2,TGFBR3,THY1,TPM1,VDR,WIPF1,ZEB2                                                                                                                                                                                                                                                                                                                                                                                                                    |
| RUNX3           | 0,469  | transcription regulator           |           | -0,921 | -0,960 | -0,007 | 5,59E-06 | 7,88E-05 | ABCC1,ABCC2,ABCC5,BAX,CAPN6,CCND1,CCR7,CDH11,CDX2,COL4A1,CPVL,DIP2C,EXT1,FBN1,FLNA,FSTL1,FZD2,GRK5,IL13,IL18,ITGAL,ITGAM,MACF1,MID1,MMP2,MMP9,NUAK1,PAPPA,PXDN,SGPP1,SLIT2,SPP1,ST3GAL5,STC2,THY1,TIMP2,UGCG,VIM,VWF,WT1                                                                                                                                                                                                                                                                                                                                                                                                                                                           |
| YY1             |        | transcription regulator           |           | 1,494  | 1,491  | -0,001 | 5,64E-06 | 7,93E-05 | AURKA,BLNK,BTF3,CALR,CAPG,CBX3,CCNA2,CCNB1,CCNB2,CCR5,CD3D,CD93,CDKN2C,CEND1,CLU,COL15A1,COL1A1,CRABP1,CXCL12,CXCR4,CYBB,DMPK,DROSHA,EIF4G2,FAS,FCER1A,FOS,FUZ,GADD45G,GBP1,GPC3,HLA-DRA,HSPA5,ID2,ID3,JCHAIN,KIF20A,LMNB1,MAD2L1,MAT2A,MCM5,MCM6,MCM7,MMP2,NIPSNAP1,NKX2-5,NOTCH2,PCNA,PDGFRA,PMT,PERP,PPP1R15A,PRC1,RAB8B,RND3,RRM1,SFXN1,TACC3,TCF4,TGFB1,TLN2,TNNC1,TNN1,TOP2A,TP53,TRA2A,USP14,VAV1,VEGFA,VEGFC,VWF,WT1,YWHAE,ABCC2,ABCC3,ACOX1,AHR,APOA1,CSHL1,CYP27A1,CYP2A6 (includes others),CYP2B6,CYP2C8,CYP3A4,CYP3A7,DIO1,EPHX1,FBRS,G6PC,GADD45B,GSTM4,GSTP1,HK1,HNF4A,ICAM1,IL1R1,MAFF,NEDD9,PKC1,POR,PSMB7,RARRES1,RPA2,SCD,SLC29A1,STEAP4,SULT2B1,TMPRSS2,TNFAIP2 |
| NR1H3           | -0,714 | ligand-dependent nuclear receptor |           | -0,913 | -0,870 | 0,008  | 5,94E-06 | 8,33E-05 | ARG2,BARD1,BHLHE40,CCL19,CDH3,CFD,CIDEA,CLDN1,COL1A1,COL1A2,CTSF,DVL1,FN1,GPD1,HSF4,MCM6,MMP2,MPZL1,MSH2,NDRG1,NIPSNAP2,NOTCH2,PCGF2,POLE2,PPIH,RIC8A,RRM1,SLC2A5,SLC34A2,SPARC,TMEM45A,TOBPB1,TRIM5,TSKU,USP2,VIM                                                                                                                                                                                                                                                                                                                                                                                                                                                                 |
| SPARC           | 0,704  | other                             | Inhibited | -2,260 | -2,269 | -0,002 | 5,94E-06 | 8,33E-05 | ARG2,BARD1,BHLHE40,CCL19,CDH3,CFD,CIDEA,CLDN1,COL1A1,COL1A2,CTSF,DVL1,FN1,GPD1,HSF4,MCM6,MMP2,MPZL1,MSH2,NDRG1,NIPSNAP2,NOTCH2,PCGF2,POLE2,PPIH,RIC8A,RRM1,SLC2A5,SLC34A2,SPARC,TMEM45A,TOBPB1,TRIM5,TSKU,USP2,VIM                                                                                                                                                                                                                                                                                                                                                                                                                                                                 |
| TWIST1          | 0,104  | transcription regulator           | Activated | 2,755  | 2,777  | 0,003  | 5,97E-06 | 8,36E-05 | ADAMTS1,AXL,BAX,C3,CASP3,CD40,CD44,CLU,COL1A1,CXCL12,DKN,DKK3,EFNB2,EMP3,ESR1,EZH2,FAS,FGFR3,FN1,FOS,FOSL1,FOXO1,IGFBP4,ITGB3,MET,MME,MMP1,MMP2,OSGIN1,PCOLCE,PDGFRA,PDZD2,PROM1,PXDN,RHOA,RUNX3,SDC3,SLC29A1,SPP1,TGFB1,TGFBR2,THBS2,TNFRSF21,TP53,VCAN,VEGFA,VIM,ZEB2                                                                                                                                                                                                                                                                                                                                                                                                            |
| glucosamine     |        | chemical - endogenous mammalian   |           | 1,921  | 1,909  | -0,003 | 6,40E-06 | 8,94E-05 | ACACA,ACADM,ASS1,ATP5MC2,COX6A2,CXCL1,DDIT3,GPD1,HSP90B1,ICAM1,INSR,LEPR,MDH2,NOS2,NPPA,PCCB,SLC25A11,SLC25A5,STAT3,TP53,TXNIP,UQCRC2                                                                                                                                                                                                                                                                                                                                                                                                                                                                                                                                              |
| mir-155         |        | microRNA                          | Inhibited | -3,644 | -3,675 | -0,005 | 6,52E-06 | 9,10E-05 | ADAM10,ANXA2,BCL6,CCL18,CCL5,CCND1,CD47,CD69,CLDN1,CXCL10,DNAJB1,HIF1A,IL13,IL13RA1,IL7,INPP5D,IRF7,IRF8,IRF9,MAF,MME,MSH2,MSH6,MX1,MYB,MYD88,NOS2,PDCC4,PSIP1,PTEN,RORA,S1PR1,SDCBP,SMAD2,STAT1,STAT3,TP53,TRIM32                                                                                                                                                                                                                                                                                                                                                                                                                                                                 |
| ALDH1A2         | 0,220  | enzyme                            |           | -0,420 | -0,432 | -0,003 | 6,56E-06 | 9,14E-05 | ABCG2,ALDH1A3,ATF3,CD44,COL1A2,COL3A1,HOXA1,IGFBP4,MAFB,NKX2-5,NPPA,PCOLCE,SPARC,SPP1,TGFB1,TIMP1                                                                                                                                                                                                                                                                                                                                                                                                                                                                                                                                                                                  |
| Tnf (family)    |        | group                             | Activated | 2,735  | 2,770  | 0,006  | 6,65E-06 | 9,24E-05 | ABCG3,ATF3,BCL2A1,BIRC2,BIRC3,C3AR1,CAVIN3,CCL5,CCL8,CCND1,CCR5,CD163,CD40,CD86,CIRBP,CXCL1,CXCL10,CXCL11,CXCL12,CXCL9,CYP2B6,CYP3A4,ENPP2,ESM1,F3,GHR,GJA1,HIF1A,ICAM1,IL1R1,IL33,KL,LCN2,MMP9,NOS2,NOX4,NOX5,PCNA,PLEK2,PTGER3,SELL,SHBG,TLR2,TNFRSF1B,VCAM1                                                                                                                                                                                                                                                                                                                                                                                                                     |
| HMOX1           | -0,101 | enzyme                            |           | 0,625  | 0,615  | -0,002 | 6,94E-06 | 9,63E-05 | ABCG1,ANGPTL3,AQP1,CASP3,CCND1,CD14,CDKN1B,COL1A1,CXCL1,CXCL10,CXCL12,CXCL9,ENG,FGF1,FOS,GCLC,GPT,GPX3,ICAM1,ID1,ID3,ITGAM,ITGB3,MAPT,MMP9,NFE2L2,NOS2,NPPA,PCNA,PECAM1,PITX3,PROCR,RORC,SLC25A5,SPARC,THBS2,TP53,VCAM1,VEGFA,ZFP36                                                                                                                                                                                                                                                                                                                                                                                                                                                |
| hyaluronic acid |        | chemical - endogenous mammalian   |           | 1,110  | 1,134  | 0,004  | 7,01E-06 | 9,70E-05 | ACKR3,CCL5,CCR7,CD40,CD44,CD83,CD86,CDKN1B,CSF1R,CTSK,CXCL10,CXCR4,FN1,FOS,ICAM1,LY96,MET,MMP1,MMP2,MMP9,MYD88,NCF2,NFKB1,NOS2,NR4A1,PCNA,PDCC4,PTEN,PTGES,PTPRC,RHOA,SPP1,TIMP1,TIMP2,TLR2,TLR4,VCAM1                                                                                                                                                                                                                                                                                                                                                                                                                                                                             |
| PTK2            | 0,012  | kinase                            |           | 1,048  | 1,066  | 0,004  | 7,02E-06 | 9,70E-05 | BIRC2,BIRC3,CCND1,CDKN1B,COL1A1,COL1A2,FN1,FOS,MMP2,MMP7,MMP9,NPPA,P4HA1,PALLD,PCOLCE2,PRRX1,SERPINB1,SPP1,TIMP1,TJP1,TNC,TP53,VCAM1                                                                                                                                                                                                                                                                                                                                                                                                                                                                                                                                               |
| BMP2            | 0,022  | growth factor                     |           | 1,004  | 1,045  | 0,006  | 7,48E-06 | 1,03E-04 | ACP5,ALPL,AOC1,ATP2C2,BHLHE40,CALB1,CCND1,CDKN1B,CLDN3,CLIC4,COL1A1,COL1A2,CRYM,CTSK,CXCL12,CYP17A1,EGF,EPHX2,ESRRG,F3,FN1,FOS,FOSB,FOXO1,GADD45B,ID1,ID2,ID3,IFIH6,IHH,KLF9,LRP5,MEF2C,MMMP9,MRAS,NFYB,NKX2-5,NPPA,POSTN,PTH1R,RGS6,RUNX3,SLC26A2,SMAD1,SMAD7,SPARC,SPP1,STK25,TAC1,TBX2,TG,TIMP1,TNFRSF11B,TOB1,VCAN,VDR,VEGFA                                                                                                                                                                                                                                                                                                                                                   |

|                                               |        |                                           |           |        |        |        |          |          |                                                                                                                                                                                                                                                                                                                                                                                            |
|-----------------------------------------------|--------|-------------------------------------------|-----------|--------|--------|--------|----------|----------|--------------------------------------------------------------------------------------------------------------------------------------------------------------------------------------------------------------------------------------------------------------------------------------------------------------------------------------------------------------------------------------------|
| MED1                                          |        | transcription regulator                   |           | 0,312  | 0,354  | 0,008  | 7,96E-06 | 1,10E-04 | ACAA1,ACACA,ACOX1,AOC1,AURKA,BAX,BCL11A,BCL6,BCL7A,BHLHE40,CCNB1,CCND1,CCND2,CDK1,CFD,CYP17A1,CYP2B6,CYP4A11,DIO1,DTYMK,EHHADH,FAM89B,FOXO1,GADD45A,GHR,GSTP1,HPRT1,ID2,IL2RB,IRF8,LBR,MAD2L1,MET,NCL,NR1I3,PKD4,PRDM14,PRLR,SCP2,SMARCA4,STC2,TERT,TNNC1,TNNI1,TP53,VDR,XBP1                                                                                                              |
| VDR                                           | -0,535 | transcription regulator                   |           | 0,331  | 0,318  | -0,002 | 8,03E-06 | 1,10E-04 | ABCC3,ACACA,ACE,ACOX1,CALB1,CCND1,CD14,COL1A1,CPT2,CSHL1,CXCL10,CYP27B1,CYP2B6,CYP3A4,DOK1,F3,GADD45A,GPD1,ICAM1,IFI44L,IL18,KL,NGF,NOD2,NPHS1,NPPA,NR0B2,PDLIM2,PLD1,PLIN2,PNPLA2,PTPRF,SERPINC1,SLC10A2,SLC34A1,SLC34A2,SPP1,STAT4,TERT,TMPRSS2,TRPV5,UCP2,VDR                                                                                                                           |
| TGFA                                          |        | growth factor                             |           | 1,639  | 1,675  | 0,007  | 8,04E-06 | 1,10E-04 | ALB,BIRC3,CASP1,CCL20,CCL5,CCND1,CXCL10,ESR1,FGF7,FOS,GJB1,GSTP1,ICAM1,IGFBP4,ITGAM,LCN2,MMP9,PECAM1,PLA2G4A,PRNP,PTGS1,PTTG1,RB1,S100A10,SLPI,TLR5,TP53,VEGFA,VIM                                                                                                                                                                                                                         |
| dinoprost                                     |        | chemical - endogenous mammalian peptidase |           | 0,601  | 0,620  | 0,004  | 8,15E-06 | 1,11E-04 | ADM,ANGPTL3,ANXA4,CCND1,CCND2,CD36,ESR1,FOS,GSTP1,HMGCS2,HSD11B2,ID1,ID2,ID3,LIPA,MMP1,MMP9,NFIL3,NR4A1,PDI A4,PLA2G4A,POR,PRLR,PTGS1,SCP2,SPP1,VEGFA,YWHAE                                                                                                                                                                                                                                |
| PLG                                           | -2,024 | peptidase                                 |           | 1,945  | 1,993  | 0,009  | 8,15E-06 | 1,11E-04 | APOH,BAX,CAV1,CD40,CLEC7A,CLIC4,CNN2,COL1A1,COLEC12,ELMO1,F3,FCGR2B,FYN,MIF,MMP1,MMP9,MRC1,MX1,NOS2,PECA M1,PIK3CB,PLG,RAC1,RAC2,RHOA,SYK,TNFRSF11B,VAV1                                                                                                                                                                                                                                   |
| heparin                                       |        | chemical - endogenous mammalian peptidase |           | -1,132 | -1,119 | 0,003  | 8,16E-06 | 1,11E-04 | ACADL,ACADM,ACADVL,APOE,CCND1,CD40,CD83,CD86,CDKN1B,COL1A1,DUSP1,F3,FN1,FOS,HPSE,ICAM1,IL1R1,MMP1,MMP2,MM P9,NOS2,PAPPA,PROCR,SELP,TNFAIP6,VEGFA,VIM                                                                                                                                                                                                                                       |
| TFAM                                          |        | transcription regulator                   | Inhibited | -3,481 | -3,464 | 0,005  | 8,28E-06 | 1,12E-04 | ACADL,ACADM,ACADS,ACOX1,AUH,CPT2,ECH1,ECHS1,HK1,PFK P,PPARA,SLC25A20                                                                                                                                                                                                                                                                                                                       |
| PSEN2                                         | 0,045  | peptidase                                 |           | -1,389 | -1,394 | -0,001 | 8,51E-06 | 1,15E-04 | ABCC6,ACSL1,ACTB,ANXA5,ATP6V0D1,BAX,C1QA,C1QB,C3AR1,CAP1,CASP3,CCS,CD74,CD9,COX8A,CTSS,CTSZ,CYTIP,ENPP2,FZD4,GJA1,GNB1,GPX5,HLA-E,INSR,KCNAB2,NDUFS8,PDGFRA,PRC1,PSENE1,PTPRF,STAB1,THY1,TP53                                                                                                                                                                                              |
| MAPK9                                         |        | kinase                                    |           | 0,472  | 0,500  | 0,004  | 8,62E-06 | 1,16E-04 | ACACA,AQP1,BAX,BIRC3,CACNB3,CAV1,CCL5,CDKN1B,CIDEA,EGF,FAS,FGL2,FOS,FOSL1,GADD45A,GADD45B,HIF1A,IFI16,IL15RA,IL18,IRF9,ISG20,JUND,LGALS3BP,LUC7L3,MARCKSL1,MIF,MMP9,NCL,NMI,NOS2,NR1H3,PDIA3,PLA2G4A,PLIN2,PPARA,PPP1R15A,PTEN,PTGES,RAC1,SCD,SEM1,SOD2,TBP,TLR3,TP53,VDR,ZFP36                                                                                                            |
| STAT5a/b                                      |        | group                                     |           | 0,696  | 0,735  | 0,008  | 9,00E-06 | 1,21E-04 | AHR,BCL2A1,BCL6,CCND1,CCND2,CD36,CD69,CDKN1B,CDKN2C,CISH,DUSP1,FCER1G,FCMR,FOS,GYP A,ID2,IDI1,IL13,IL4R,IRF1,LC P2,LEPR,MAF,MMD,MYD88,NETO2,NOX5,PCK1,RBP1,RFTN1,STK 17B,TLR2,WDR3                                                                                                                                                                                                         |
| ITGAV                                         | 0,782  | transmembrane receptor                    |           | 1,768  | 1,789  | 0,006  | 9,05E-06 | 1,22E-04 | BAX,BIRC2,CD36,CDK1,CDKN1B,COL1A1,COL1A2,FN1,FOS,ITGAV,ITGB3,MMP1,MMP2,MMP9,PCNA,TIMP1,TP53                                                                                                                                                                                                                                                                                                |
| ZEB2                                          | 0,287  | transcription regulator                   |           | 1,502  | 1,485  | -0,004 | 9,20E-06 | 1,24E-04 | ALPL,AXL,CCND1,CX3CR1,ESRP2,FCER1A,FCN1,GAB2,GATM,GZMA,ID2,IL7R,INPP5D,KRT19,MYB,NKG7,PTEN,SELL,SFRP1,TERT,VCAM1,VIM                                                                                                                                                                                                                                                                       |
| miR-125b-5p (and other miRNAs w/seed CCCUGAG) |        | mature microRNA                           | Inhibited | -2,140 | -2,195 | -0,010 | 9,46E-06 | 1,27E-04 | ADAMTS1,ALOX5,CASP6,CBFB,CCNA2,CCR5,CD44,CDH5,DICER1,DUS1L,ENTPD4,ERBB3,GSS,ID1,ID2,ID3,IL6R,KRT19,LIPA,MYD88,NOS2,PCTP,PERP,PIGR,PPT2,PROM1,SCD,SGPL1,TP53,TSPAN8,UBE2I,VPS4B                                                                                                                                                                                                             |
| IL33                                          | 0,472  | cytokine                                  | Activated | 2,597  | 2,648  | 0,007  | 9,53E-06 | 1,28E-04 | ABCG1,ACAT1,ACTB,ADAMTS1,ALDH1A3,ALDH3A1,APOE,AXL,BCL2A1,BIRC3,CCL18,CCL5,CCND1,CCR2,CD36,CD40,CD69,CD86,CISH,COL3A1,CXCL10,EHD1,ELMO1,EPHX2,FAS,G0S2,GADD45B,GCHFR,GOSR2,GRK2,HCK,HIF1A,ICAM1,IL13,IL15,IL2RG,ITGAM,KL C1,LAMA5,LEPR,MDK,NCF4,NFKB1,NFKBIE,NOS2,NPHS2,PEA15,PILRA,PLIN2,PTPRK,RASGRP1,S100A8,SOD2,ST3GAL5,TFEC,TIMP1,TLR2,TNFAIP2,TNFRSF1B,TNFSF10,TPBG,TUBB6,VASH1,VEGFC |



|                |        |                                   |           |        |        |        |          |          |                                                                                                                                                                                                                                                                                                                                                                                                                                                                                                                                                   |
|----------------|--------|-----------------------------------|-----------|--------|--------|--------|----------|----------|---------------------------------------------------------------------------------------------------------------------------------------------------------------------------------------------------------------------------------------------------------------------------------------------------------------------------------------------------------------------------------------------------------------------------------------------------------------------------------------------------------------------------------------------------|
| EZH2           | 0,364  | transcription regulator           |           | 1,157  | 1,158  | 0,000  | 9,60E-06 | 1,28E-04 | ACKR3,ACTB,ADAM10,ADRB2,ALOX5AP,ALPL,ATF3,BIRC3,BMP7,C3,CCL5,CCND1,CCND2,CCND3,CCR5,CD63,CDKN1B,CDX2,COLA1,CPD,CSNK1A1,CUL1,CXCL1,CXCL10,CXCL11,CYP1B1,DNMT1,EVX1,EZH2,FBN1,FKBP5,FRZB,GSTM4,HCP5,HOXA1,HOXA10,HOXB5,HOXB6,HSD11B2,ICAM1,IL10RA,IL13,IL36A,JAM2,KRAS,KRT81,LCN2,LTB,MMP2,MMP7,MMP9,MNDA,MPZL2,MYL6,NDRG1,NME1,NOTCH2,PARP12,PDGFRA,PER1,PIK3IP1,PLA2G4A,PLAAT4,PLEKHA6,PROM1,PSMD1,PTEN,PTGES,RAC3,RNF19B,S100A4,S100A8,S100A9,SCP2,SFN,SGPL1,SLC1A3,SLC22A18AS,STT3A,TIMP2,TMPRSS2,TP53,TRIM38,TSPAN7,UBD,VEGFA,WIF1,WNT10B,WTAP |
| H1-6           |        | other                             | Activated | 2,523  | 2,556  | 0,006  | 1,03E-05 | 1,37E-04 | ARPC5,ATP6V0E2,B2M,B4GALT5,BHMT,CANT1,CD36,CD81,DAO, DENND2D,FARP1,FKBP4,FOS,GLUL,GPHN,HIRIP3,LYRM9,MAN2B1,MCM6,PCCB,PPT2,PRKCQ,RRM1,SERINC3,SMARCE1,TEX2,THA P1,TMEM246,TMEM53,ZC3H4                                                                                                                                                                                                                                                                                                                                                             |
| NPC1           | 0,294  | transporter                       | Inhibited | -3,424 | -3,443 | -0,005 | 1,03E-05 | 1,37E-04 | ABCG1,ALPL,CAV1,CAV2,CCND1,CCR2,CCR5,CD74,CD8A,CTSB,CTSD,CTSK,CYP27A1,CYP27B1,DDIT3,HLA-DQB1,IDI1,LIPA,LYZ,MCM2,MYLIP,PNPLA3,S100A8,S100A9,SCD,S TAT1,STAT3,STAT4,TLR4,XBP1                                                                                                                                                                                                                                                                                                                                                                       |
| MAFB           | 0,772  | transcription regulator           |           | 0,604  | 0,636  | 0,006  | 1,03E-05 | 1,37E-04 | ACTB,ACTN1,ADA,CACNA2D3,CAP1,CD163,CD2AP,CD38,CNN2,C XCL12,CXCL9,FPR1,GATM,HS3ST1,HTR2B,IL7R,MAFB,MARCKS,M MP9,NPHS1,NPHS2,NUAK1,OLFML2B,PCK1,RNASE1,SLC2A2,SLC 7A8,STAB1,THG1L,TP53                                                                                                                                                                                                                                                                                                                                                              |
| H1f1           |        | other                             | Activated | 2,523  | 2,556  | 0,006  | 1,03E-05 | 1,37E-04 | ARPC5,ATP6V0E2,B2M,B4GALT5,BHMT,CANT1,CD36,CD81,DAO, DENND2D,FARP1,FKBP4,FOS,GLUL,GPHN,HIRIP3,LYRM9,MAN2B1,MCM6,PCCB,PPT2,PRKCQ,RRM1,SERINC3,SMARCE1,TEX2,THA P1,TMEM246,TMEM53,ZC3H4                                                                                                                                                                                                                                                                                                                                                             |
| SIN3A          |        | transcription regulator           |           | 0,024  | 0,000  | -0,008 | 1,04E-05 | 1,38E-04 | ALDH6A1,ARID4B,BCL6,CASP3,CCND2,COL1A1,COL1A2,CTSK,DD IT3,ESR1,GADD45B,GSTP1,HLA-DRA,MMP9,MXI1,NCL,PMM1,S100A9,SET,SMAD7,TERT,TGFB2,T P53BP1,TXNIP                                                                                                                                                                                                                                                                                                                                                                                                |
| KLF11          | 0,124  | transcription regulator           |           | -0,563 | -0,550 | 0,003  | 1,06E-05 | 1,40E-04 | ACSL5,ADAMTS1,BMP7,CAT,CAV1,CCR2,CHRND,COL1A2,COL3A 1,CPT2,CXCR4,DCN,EGF,ENG,IL13,ITGA2,ITGA3,ITGAV,ITGB3,ITG B6,ITGB8,MAOB,MMP1,MMP2,MMP9,NFKB1,PKD4,PLA2G4A,PLG,P PARGC1A,SLC25A20,SMAD2,SMAD7,SOD2,STAT1,TGFB2,THBS 2,TIMP1,TIMP2,VEGFA                                                                                                                                                                                                                                                                                                        |
| NR0B2          | -0,568 | ligand-dependent nuclear receptor | Activated | 4,153  | 4,118  | -0,008 | 1,08E-05 | 1,43E-04 | ACACA,ACADM,ACOX1,APOA1,APOM,BAAT,CD36,CEL,ESRRG,FB P1,G6PC,GPT,HNF1A,HNF4A,LPIN1,MTTP,NR0B2,P4HB,PCK1,PC K2,PDIA3,PDIA4,PKD4,PPARGC1A,SCD,SLC10A2,SPP1,TIMP1                                                                                                                                                                                                                                                                                                                                                                                     |
| GH1            |        | growth factor                     |           | -1,391 | -1,381 | 0,002  | 1,10E-05 | 1,44E-04 | ABCC1,ATF3,CCNB1,CCND3,CISH,CLU,CSHL1,CXCR4,CYP3A4,D DIT3,DECR1,ERBB3,FN1,FOS,GADD45A,GHR,HDAC1,HOXA1,ID2,I D3,IL4R,MYB,NOS2,PRLR,PTEN,RHOA,RYK,SHMT2,SMARCA4,SO CS2,SOD1,SPP1,TKT,UBA7,VEZF1,VIM,ZFP36                                                                                                                                                                                                                                                                                                                                           |
| IGF2           |        | growth factor                     |           | 0,650  | 0,666  | 0,004  | 1,11E-05 | 1,45E-04 | ALAD,CASP6,CCND1,CD36,CDK1,CKM,CTSV,CXCR4,CYP1B1,DDI T3,DHCR7,DUSP1,ELOVL6,FN1,GADD45A,GCH1,GHR,GNAI2,GNB 1,GRN,HIF1A,IDH1,IFITM2,IGFBP4,IGFBP6,KLF9,MCM2,MCM5,MCM 7,MMP1,MXI1,NDRG1,NGF,NOS2,PDCD4,PMS1,PRIM1,PRKCQ,PT EN,RHOB,RRM1,RRM2,SEZ6L2,SKAP2,SPP1,TGFBI,THBS2,TP53, VEGFA                                                                                                                                                                                                                                                               |
| Ap1            |        | complex                           |           | -0,473 | -0,430 | 0,009  | 1,15E-05 | 1,50E-04 | ACE,ATF3,BCL2A1,C3AR1,CALM1 (includes others),CCL5,CCNA2,CCND1,CD40,CD44,CDX2,CLU,CXCL12,DDIT 3,DNMT1,F2RL1,F3,FN1,FOS,FOSL1,GSS,GSTP1,GZMB,HBB,HPG D,HSP90B1,IFRD1,IL13,ITGA2,MET,MMP1,MMP2,MMP7,MMP9,NDR G1,NGF,NOS2,PCK1,S100A4,SNCG,SPARC,TIMP1,TLR4,UTRN,VC AM1,VDR,VEGFA                                                                                                                                                                                                                                                                    |
| ABL1           | 0,131  | kinase                            |           | -0,597 | -0,568 | 0,007  | 1,15E-05 | 1,50E-04 | C3,CAV1,CCNA2,CCND1,CCND2,CDKN1B,CGA,CTSB,DOK1,FAS, GADD45A,MMP1,NME1,NOX5,PAK2,SST,TP53,VEGFA                                                                                                                                                                                                                                                                                                                                                                                                                                                    |
| RORA           | -0,589 | ligand-dependent nuclear receptor | Inhibited | -2,175 | -2,151 | 0,006  | 1,24E-05 | 1,61E-04 | ACACB,ACTB,ADIPOR1,APOA4,APOC3,APOE,ASNS,BHMT,CCL5, CCNB1,CD36,CISH,CXCL10,CYP27A1,CYP2A6 (includes others),CYP2B6,CYP2C8,CYP46A1,CYP4A11,DDC,ELOVL6,G6PC,G ADD45B,GOT1,GSTM4,GSTP1,HPGD,HSD17B10,IL18,KCNK5,LCN2 ,NAT8,NNMT,NOCT,NR1I3,NSDHL,NTRK2,PCK1,PLIN2,POR,PPAR GC1A,PPP1R3C,RORA,RORC,S100A8,S100A9,SCD,SELENBP1,SL C13A2,SLC16A7,SLC25A24,TLR3,UCP2,VLDLR                                                                                                                                                                               |
| IGBP1          | -0,209 | phosphatase                       |           | 1,594  | 1,600  | 0,002  | 1,25E-05 | 1,62E-04 | CASP1,CHUK,CLDN1,CLDN3,IRF1,NOS2,RAC1,TJP1                                                                                                                                                                                                                                                                                                                                                                                                                                                                                                        |
| corticosterone |        | chemical - endogenous mammalian   |           | -0,882 | -0,880 | 0,000  | 1,25E-05 | 1,62E-04 | ACACA,ACOX1,ANXA1,ARC,AVP,BACE1,CALB1,CAV1,CCND1,CD KN1B,CGA,CSHL1,CYBA,DDIT3,FKBP5,FOS,GLUL,GZMB,HSPA5,K LF9,LHB,MAOA,MAPK8,MMP9,MTOR,NOS2,NOX4,NPPA,PKD4,PN PLA2,PPARGC1A,SFRP1,SGK1,SLC12A3,TLR2,UCP2,WNT10B,XB P1                                                                                                                                                                                                                                                                                                                             |
| EDNRA          |        | transmembrane receptor            | Activated | 2,970  | 3,000  | 0,010  | 1,29E-05 | 1,67E-04 | COL1A1,COL3A1,FOS,ICAM1,ITGAM,MMP2,PTGS1,SELL,TIMP1,TI MP2                                                                                                                                                                                                                                                                                                                                                                                                                                                                                        |

|                           |        |                                   |           |        |        |        |          |          |                                                                                                                                                                                                                                                                                                                    |
|---------------------------|--------|-----------------------------------|-----------|--------|--------|--------|----------|----------|--------------------------------------------------------------------------------------------------------------------------------------------------------------------------------------------------------------------------------------------------------------------------------------------------------------------|
| CAT                       | -0,632 | enzyme                            |           | -1,022 | -1,046 | -0,005 | 1,31E-05 | 1,68E-04 | ADM,BAX,BCL2A1,CAV1,CD36,CD69,CDKN1B,COL1A1,CYP1B1,FN1,GCLC,HIF1A,HLA-DRA,MMP1,MMP9,NOS2,TIMP1,TNC,TP53,VCAM1,VIM,XAF1                                                                                                                                                                                             |
| NFATC1                    |        | transcription regulator           |           | 0,226  | 0,261  | 0,008  | 1,36E-05 | 1,75E-04 | ACP5,AHR,BMP7,CCND1,CCND2,CD3G,CD40,CDKN1B,COL1A1,C                                                                                                                                                                                                                                                                |
| HDAC4                     |        | transcription regulator           |           | -0,281 | -0,293 | -0,004 | 1,42E-05 | 1,81E-04 | TSK,CX3CR1,CYBB,CYP1B1,FAS,HNF1A,HNF1B,HNF4A,ICAM1,IL33,ITGAV,ITGB3,NOX4,PLS3,POU2AF1,PRLR,PTEN,RCAN1,RORC,SELL,SLC2A2,SPP1,TNFSF10,UTRN,VCAM1                                                                                                                                                                     |
| NFKB2                     |        | transcription regulator           | Activated | 2,399  | 2,430  | 0,007  | 1,43E-05 | 1,82E-04 | ARC,ATF3,CACNA2D1,CALB1,CAMK2A,CAP2,CCNB1,CHN1,CKM,CYFIP2,ETNPPL,FGF13,FOS,FOSL1,G6PC,GADD45A,GPHN,HDAC1,HIF1A,HLA-DRA,KLHL2,MAPK10,MAPK8,MEF2C,MMP9,MYOM2,NBEA,NOS2,NR4A1,PRKCA,RGS7,SH3GL2,TERT,TP53BP1,TRPV1,TSPAN13,TPAN7,VCAM1,VEGFA                                                                          |
| TICAM1                    | -0,022 | other                             | Activated | 4,907  | 4,965  | 0,009  | 1,44E-05 | 1,83E-04 | AKR1B1,ANXA5,BIRC3,CCL19,CCL20,CCL5,CCND1,CCR7,CD83,CD86,CTSS,CXCL12,CXCR4,FOS,GPR183,HLA-DMB,HLA-DOA,HLA-DQA1,MARCKSL1,MAT2A,MMP2,MMP9,MYB,PTEN,SELL,SOD2,TNFAIP2,VCAM1                                                                                                                                           |
| BCR (complex)             |        | complex                           | Activated | 3,273  | 3,314  | 0,007  | 1,44E-05 | 1,83E-04 | ACSL1,APOBEC3B,ATP6V1E1,CASP4,CCL5,CD38,CD40,CD86,CFB,CXCL10,CXCL11,CXCL6,DDX58,DUSP1,FAS,FPR1,ICAM1,IFIH6,IFIT2,IFIT3,IL15,IL15RA,IL18,IRF1,IRF7,ISG15,ISG20,LPAR1,MAFF,MC                                                                                                                                        |
| Collagen type I (complex) |        | complex                           | Activated | 2,609  | 2,633  | 0,005  | 1,46E-05 | 1,85E-04 | M2,MET,NFKB1,PILRA,PSTPIP2,RHOB,RSAD2,SAMHD1,TFEC,TLR2,TLR3,TNFSF10,TSC22D1,VCAM1                                                                                                                                                                                                                                  |
| MED13                     |        | transcription regulator           |           | 0,092  | 0,077  | -0,003 | 1,56E-05 | 1,97E-04 | BCL2A1,BCL6,CALR,CASP3,CCNA2,CCND1,CCND2,CCND3,CCR7,CD1C,CD27,CD300A,CD44,CD69,CD86,CDKN1B,CTCF,CXCR4,FAS,FCMR,FOS,FOSB,FOXO1,GBP2,GZMB,HLA-DMA,HSP90B1,HSPA5,IL13,IL2RB,JAK1,KLF9,LAIR1,LCK,MS4A6A,NAMPT,POU2AF1,S100A10,S1PR1,SELL,XBP1                                                                          |
| superoxide                |        | chemical - endogenous mammalian   | Activated | 2,933  | 2,950  | 0,006  | 1,57E-05 | 1,97E-04 | APOE,BAX,CCL5,CCND1,CD83,CDX2,COL1A1,F11,FN1,ITGA2,ITGA3,ITGAV,MMP1,MMP2,MMP9,PLOD2,PRRX1,PTEN,RAC1,RECK,S100A10,TIMP2,TNC,TP53,VIM                                                                                                                                                                                |
| SAFB2                     | -0,232 | other                             | Inhibited | -2,481 | -2,496 | -0,004 | 1,60E-05 | 2,01E-04 | ACACA,ACSM3,CD36,CIB2,CIDEC,CYP2A6 (includes others),ELOVL6,ENO1,G6PC,GPD1,GYS1,KITLG,KNG1,NTRK2,PGA                                                                                                                                                                                                               |
| DEPTOR                    | 0,163  | other                             | Inhibited | -2,620 | -2,646 | -0,010 | 1,65E-05 | 2,06E-04 | M2,PKLR,PYGL,SCD,SERPINA5,TKT                                                                                                                                                                                                                                                                                      |
| OSCAR                     |        | other                             |           | -0,018 | 0,000  | 0,005  | 1,75E-05 | 2,19E-04 | CAV1,CLU,CYBA,FN1,ICAM1,ID3,MARCKSL1,MMP9,SOD2,TIMP1,TLR8                                                                                                                                                                                                                                                          |
| CXCR4                     | 1,330  | G-protein coupled receptor        |           | 1,890  | 1,919  | 0,007  | 1,91E-05 | 2,38E-04 | B2M,BCCIP,FOS,HLA-C,HLA-DPB1,HLA-E,MLLT3,PPP1R12A,PSMB9,RPL35A,SAFB2,UBE2B,UQCRC2                                                                                                                                                                                                                                  |
| MUC1                      | 0,773  | other                             |           | 0,540  | 0,568  | 0,006  | 1,91E-05 | 2,38E-04 | CCL20,CCR2,CD40,CD83,CD86,CX3CR1,CXCL1,FZD2,ICAM1,IL1R1,ITGAM,MMP7,RRAS,TLR7,TLR8,TNFSF10                                                                                                                                                                                                                          |
| MAP2K6                    | -0,107 | kinase                            |           | 0,873  | 0,899  | 0,007  | 1,92E-05 | 2,38E-04 | ACKR3,AXL,CCND1,CD44,CD69,CD9,CDH11,CXCL1,CXCL10,CXCL12,CXCR4,DPP4,F3,GAD1,ID1,ID2,IGFBP7,MMP2,RRAS,TNFRSF10D,TNFSF10,TNNC1,TP53                                                                                                                                                                                   |
| RXRB                      |        | ligand-dependent nuclear receptor |           | 0,932  | 0,928  | -0,002 | 1,95E-05 | 2,42E-04 | ABCC1,CAT,CCND1,CCND2,CD1D,CD40,CD83,CD86,CDH11,CDKN1B,GCLC,HIF1A,HLA-DRA,IFIT3,IFITM1,MRC1,MT1G,MUC1,SOD1,SOD2,STAT1,TERT,VIM                                                                                                                                                                                     |
| TNFSF13B                  |        | cytokine                          |           | 1,411  | 1,435  | 0,006  | 1,96E-05 | 2,42E-04 | ACP5,BAX,CCL8,CCND1,CD40,CD83,CD86,CKM,CXCL10,CXCL9,ESR1,IFIT2,IHH,IRF9,ISG15,MMP1,MMP2,MMP9,NOS2,NPPA,PPARG                                                                                                                                                                                                       |
| MRTFB                     | 0,221  | transcription regulator           |           | 0,265  | 0,243  | -0,006 | 2,32E-05 | 2,85E-04 | C1A,PTH1R,RGS7,SLC1A3,STAT1,TNFSF10,VDR                                                                                                                                                                                                                                                                            |
| TREM1                     | 0,030  | transmembrane receptor            |           | -1,289 | -1,252 | 0,005  | 2,32E-05 | 2,85E-04 | ACADM,ACOX1,ACSL1,ATP1A3,C1QA,CCL20,COLEC12,CSHL1,CTSB,CTSS,CXCL10,FABP1,FLRT3,FSTL1,IGFBP6,IL13,LCN2,LYZ,MM                                                                                                                                                                                                       |
| E2f                       |        | group                             | Activated | 2,737  | 2,766  | 0,008  | 2,33E-05 | 2,85E-04 | P2,PMP22,S100A4,S100A8,SEMA4D,SPP1,TERT,VCAN                                                                                                                                                                                                                                                                       |
|                           |        |                                   |           |        |        |        |          |          | BAX,BCL2A1,BCL6,CCND2,CCR7,CD40,CD83,CD86,CTSS,CXCL6,FCGR2B,FOXO1,GPR183,HLA-DMB,HLA-DOA,HLA-DQA1,ICAM1,IL15,MM9,NAMPT,POU2AF1,SELL,SPP1,TP53                                                                                                                                                                      |
|                           |        |                                   |           |        |        |        |          |          | ACTB,CBFB,CCL5,CD151,CEBPE,CLDN15,CNN2,CPA3,CXCL6,CXCR4,CYBA,EYA2,FCN1,FLI1,FLNA,G0S2,HLA-A,LCN2,LTF,MAPK13,MGST2,MYH9,S100A8,S100A9,SELP,SERINC3,SLPI,TBXAS1,TST                                                                                                                                                  |
|                           |        |                                   |           |        |        |        |          |          | ACKR3,ADRB2,ASNS,ATF3,CCL18,CCL20,CCL5,CCR7,CD14,CD83,CD86,CDK1,CENPU,CFB,CXCL1,CXCL10,CXCR4,DTL,F3,FERMT2,FOSL1,GADD45B,GCLM,IDO1,IFIT2,IL15RA,IL1R1,IL6R,IRF1,ISG15,KCNJ2,LAMP3,MAFF,MFN1,MMP1,MT1F,MYD88,NEDD4L,NOD2,OSGIN1,PLAC8,PLD1,PLEKHF2,PTTG1IP,RCAN1,RIN2,SIGIRR,SLC1A3,SPP1,SPRY2,TFPI2,TLR2,TLR4,YRDC |
|                           |        |                                   |           |        |        |        |          |          | ALG5,CAV1,CCNA2,CCNB1,CDC7,CDK1,CYP27B1,DHPS,DLEU1,DROSHA,EFHC1,EXOSC8,GINS2,HDAC1,HIF1A,MAD2L1,MCM2,MCM3,MCM5,MCM6,MFAP1,MTHFD1,MYB,NASP,NPPA,OIP5,PCNA,PCSK1N,PGRMC1,RECQL,RPAS,SPS16,RRM2,TP53,TPX2,TTK,UBE2C,YBX3                                                                                              |

|              |        |                                 |           |        |        |        |          |          |                                                                                                                                                                                                                                                                                                                                                                                                                                                                                                                                                                                                                                                                                                                  |
|--------------|--------|---------------------------------|-----------|--------|--------|--------|----------|----------|------------------------------------------------------------------------------------------------------------------------------------------------------------------------------------------------------------------------------------------------------------------------------------------------------------------------------------------------------------------------------------------------------------------------------------------------------------------------------------------------------------------------------------------------------------------------------------------------------------------------------------------------------------------------------------------------------------------|
| PITX2        |        | transcription regulator         | Inhibited | -3,420 | -3,387 | 0,006  | 2,33E-05 | 2,85E-04 | ACAD8,CCND1,CCND2,CCND3,COL1A2,COQ6,FOXO1,FZD2,FZD4,GAD1,GADD45A,GCDH,GPX7,GRHRP,HMX1,HPGD,ITGAV,ME3,MSRA,NDUFB7,NDUFC1,NDUFS2,NDUFS3,NDUFS7,NDUFS8,NPPA,NXN,OGFOD2,PLOD1,PLOD2,PRDX2,SOD1,SOD2,TBX2,TXN2.VIM,ZEB2                                                                                                                                                                                                                                                                                                                                                                                                                                                                                               |
| SRF          |        | transcription regulator         |           | -1,310 | -1,287 | 0,004  | 2,49E-05 | 3,03E-04 | A2M,ACTB,ACTG1,AKAP12,ANAPC15,ANKRD6,APOLD1,ARC,BRD3,CALB1,CAP1,CAPRIN1,CCL5,CDH9,CEBPE,CKM,CLDN1,CLDN15,CLDN3,CNN2,CPA3,CXCR4,DSTN,EIF6,EYA2,FCN1,FERMT2,FGF1,FHL1,FHL2,FLNA,FOS,FOSB,FOSL1,G0S2,GADD45A,GADD45G,GCH1,GLIPR1,IGHM,IL15,ITGAM,LCN2,LEPR,LTF,MAP4K4,MAPK10,MAPK13,MCF2L,MGST2,MMP9,MRPS35,MTMR6,MYB,MYH9,MYL3,MYO1B,NET1,NKX2-5,NPPA,NR4A1,PDCD10,PGM1,PLA2R1,PTMS,RAI2,RND3,S100A8,S100A9,SELP,SLC37A1,SLPI,SMTN,SND1,TBP,TBXAS1,TNC,TNNC1,TNNT2,TST,TIRRB4,VCAN,WDR1,WT1                                                                                                                                                                                                                        |
| THBS4        | -0,295 | other                           | Activated | 2,552  | 2,567  | 0,004  | 2,49E-05 | 3,03E-04 | CALR,CD40,CHUK,COL3A1,CRELD2,CXCL10,HSPA5,ICAM1,MANF,MTHFD2,P4HB,SDF2L1,TNC,VCAM1                                                                                                                                                                                                                                                                                                                                                                                                                                                                                                                                                                                                                                |
| LONP1        | -0,276 | peptidase                       |           | -0,453 | -0,464 | -0,003 | 2,52E-05 | 3,04E-04 | ACADS,ACAT1,ANXA2,ASNS,ATP5F1D,C1QBP,CALU,CLPX,COX8A,DLD,EC1,ECSIT,ETFB,GARS1,GLUD1,HSPA9,MDH2,MRPS22,MTHFD2,P4HB,PDIA3,PFN1,S100A11,SOD1,SOD2,TRAP1,TUFM                                                                                                                                                                                                                                                                                                                                                                                                                                                                                                                                                        |
| CCL5         | 1,439  | cytokine                        |           | 0,488  | 0,532  | 0,009  | 2,52E-05 | 3,04E-04 | ADGRE5,AHR,CAPN2,CCL5,CCR5,CD163,CD40,CD44,CYP1B1,DDAH1,DUSP1,EGF,F2RL1,FOS,ITGAM,MMP9,NAMPT,NOS2,PNP,SGK1,SOD1,STAT1,STAT3,TLR4,TPMT,TUBB4B,ZFP36                                                                                                                                                                                                                                                                                                                                                                                                                                                                                                                                                               |
| FGFR2        | 0,151  | kinase                          |           | -0,758 | -0,743 | 0,003  | 2,59E-05 | 3,11E-04 | AFP,BAX,CA2,CA4,CCND1,CCND2,CDH11,COL1A1,COL3A1,COL4A1,COL4A2,CPE,CUBN,DAB2,DRAM1,ENPEP,FAS,FLRT3,FN1,GASK1B,GJA1,GLIPR1,GRB10,ICAM1,ID2,IHH,LAMB1,LGALS2,MRAS,MYO1F,PCOLCE,PDGFRA,PTH1R,SFRP1,SPP1,TFEC,TSPAN8,VCAM1,VEGFC                                                                                                                                                                                                                                                                                                                                                                                                                                                                                      |
| HDAC5        | -0,110 | transcription regulator         |           | -1,366 | -1,366 | 0,000  | 2,61E-05 | 3,14E-04 | ACADL,ACADM,ACSL1,ARC,ATP5F1D,CASP8,CD27,CKM,CPT2,ETNPPL,G6PC,HLA-DRA,HMGCL,HMGCS2,MEF2C,NOS2,NPPA,NR4A1,PFKL,PPARA,PPARGC1A,PTEN,SCD                                                                                                                                                                                                                                                                                                                                                                                                                                                                                                                                                                            |
| mir-133      |        | microRNA                        |           | -1,898 | -1,938 | -0,008 | 2,63E-05 | 3,15E-04 | AK2,ARFIP2,BCL2L2,CCNB1,CCND2,CERS2,CMTM6,CORO1C,CTBP2,DNMT1,FN1,FSCN1,FTL,GSTP1,HLA-G,KLF15,LPGAT1,MET,MSN,PITX3,RHOA,TNFSF10,TNNT2,UBXN7,VCAN                                                                                                                                                                                                                                                                                                                                                                                                                                                                                                                                                                  |
| RABL6        |        | other                           | Activated | 3,783  | 3,808  | 0,005  | 2,64E-05 | 3,16E-04 | ABAT,CCNA2,CCNB1,DRAM1,ELF4,EZH2,FERMT2,MAD2L1,MCM2,MCM5,MCM7,MELK,NDC80,PBK,POLE2,PRC1,PRIM1,PTPRM,TOP2A,TP53,TPX2,TTK,UBE2C,VRK1                                                                                                                                                                                                                                                                                                                                                                                                                                                                                                                                                                               |
| ONECUT1      |        | transcription regulator         |           | 0,134  | 0,139  | 0,002  | 2,66E-05 | 3,18E-04 | AASS,ABCC2,ACACB,ACSS3,ADH1B,AFP,ALDH3A1,ALDH5A1,AMT,APOH,ARHGAP32,BCKDHA,BNIP3L,C1S,C2,CD36,COA4,COPS7A,CRADD,CXCL1,DDDB2,EED,EHF,F11,FAM117A,FAS,G6PC,GJB1,GS S,GTFE1,HABP2,HLA-G,HMGB2,HNF1B,HNF4A,HNRNPR,HTR2B,ITGAV,LUC7L3,MFSD1,MYOF,NDUFAF4,NR0B2,OAT,PCK1,PFKL,PHTF1,PPFIBP1,PTPRN2,RARG,RECK,RMND1,RORA,RORC,SAMHD1,SCD,SH3BGR,SLC1A3,SLC25A13,SLC2A2,SNRPD2,SNW1,SPAST,SUPT16H,TAOK3,TBX2,TDO2,TMBIM6,TNFSF10,UGT2A3,VWA5A                                                                                                                                                                                                                                                                             |
| MET          | 0,431  | kinase                          | Activated | 2,820  | 2,854  | 0,006  | 2,67E-05 | 3,19E-04 | AQP3,AURKA,CCND1,CCND2,CD44,CDK1,CDKN1B,CTS,VCXCL1,DAB2,FGL2,FN1,FOS,GCLC,IL15,IL15RA,IL18,ITGA3,MAD2L1,MMP2,MUC1,NOX4,NPHS1,PLK2,SLA,SLCO3A1,SOD1,SOD2,SPP1,TLR3,TRIM21,TSC22D1,VEGFA,VIM                                                                                                                                                                                                                                                                                                                                                                                                                                                                                                                       |
| PROC         | -0,547 | peptidase                       |           | -0,784 | -0,796 | -0,003 | 2,94E-05 | 3,51E-04 | ACE,ACE2,BCL2A1,BIRC2,CALR,CLU,ICAM1,MMP2,MMP9,MOK,NOS2,NR4A1,PCNA,PROCR,TJP1,TLR2,TLR4,TP53,VCAM1                                                                                                                                                                                                                                                                                                                                                                                                                                                                                                                                                                                                               |
| homocysteine |        | chemical - endogenous mammalian |           | 1,449  | 1,472  | 0,005  | 2,98E-05 | 3,55E-04 | ANXA2,APOA1,ATF3,BAX,BHMT,CCL5,CCND1,CLU,CXCL10,CXCL12,DDIT3,F3,FGF1,GADD45A,HSPA5,ID1,IDI1,ITGAM,MMP2,NDRG1,NPHS2,PKM,PRDX2,TIMP1,TP53,TRIB3,VCAM1,VEGFA,XBP1                                                                                                                                                                                                                                                                                                                                                                                                                                                                                                                                                   |
| NUPR1        | 0,294  | transcription regulator         | Inhibited | -2,177 | -2,209 | -0,003 | 3,01E-05 | 3,57E-04 | ABCC5,ADCY9,ADGRG1,ADM,ADRB2,AGRN,AKAP12,ALDH5A1,APOBEC3B,ASB9,ATF3,ATR,AURKA,AVPI1,BNIP3,CAMK2N1,CARD8,CARMIL1,CCNA2,CCNB2,CD63,CDKN1B,CHUK,COL1A2,COL3A1,CREB5,CSTF2T,CXADR,CXCR4,DDIT3,DENND5B,DHTKD1,ELL2,ERMP1,ESPL1,FAM111A,FCHSD2,FGF1,FHL2,GAB2,GADD45A,GBP2,GCH1,GCNT2,GINS1,GK,GPSM2,HNRNPM,HOXB5,IFIT2,IL13RA1,IL6R,ING2,ISCA1,ITPR3,KANK2,KAT5,KIF20A,LBR,LHFPL2,LMNB1,MAT2A,MMD,MSH6,MT1X,MX2,MYD88,NDRG1,NFIL3,NSF,P3H1,P4H2,PARP1,PCTP,PCYOX1,PEA15,PFKFB3,PHTF1,PMP22,PMPGA,POLE2,PPP1R15A,PPWD1,PRNP,RAB11FIP5,RAB17,RAB29,RAB32,RAB38,RMI1,RNF19B,RPA1,SAMHD1,SHPK,SLC25A20,SPAG5,STK38,SUOX,TCTN2,TERT,TESK1,THG1L,TMEM268,TOB1,TOLLIP,TP53,TP53BP1,TP53BP2,TRIB3,UAP1,WDCP,WNK1,XBP1,ZDHHC13 |

|                                              |        |                                   |           |        |        |        |          |          |                                                                                                                                                                                                                                                                                                                                   |
|----------------------------------------------|--------|-----------------------------------|-----------|--------|--------|--------|----------|----------|-----------------------------------------------------------------------------------------------------------------------------------------------------------------------------------------------------------------------------------------------------------------------------------------------------------------------------------|
| MRTFA                                        |        | transcription regulator           |           | 1,053  | 1,046  | -0,002 | 3,10E-05 | 3,67E-04 | ACTB,ARPC1B,CBFB,CCL5,CD151,CEBPE,CLDN15,CNN2,COMT,CPA3,CXCL12,CXCL6,CXCR4,CYBA,CYFIP2,EYA2,FCN1,FLI1,FLNA,FOS,G0S2,HLA-A,ICAM1,LCN2,LTF,MAPK13,MGST2,MMP9,MYH9,NPPA,PFN1,RAC1,S100A8,S100A9,SELP,SERINC3,SLPI,STAT1,TBXAS1,TNC,TST                                                                                               |
| Pdgf (complex)                               |        | complex                           |           | 0,911  | 0,941  | 0,006  | 3,12E-05 | 3,68E-04 | BAX,CAV1,CCN3,CCND1,CCND2,CD44,CDKN1B,COL4A1,CYBA,F3, FN1,FOS,FOSB,FOXO1,GJA1,HIF1A,ICAM1,IL13,ITGB3,MCM6,MCM7,MMP1,MMP2,NOX4,PCNA,PIK3R3,SPARC,TERT,TIMP1,TP53,VCAM1,VEGFA                                                                                                                                                       |
| AMPK                                         |        | complex                           | Inhibited | -2,667 | -2,662 | 0,001  | 3,13E-05 | 3,69E-04 | ACACA,ACE,ACO2,BAX,CAT,CCNB1,CCND2,CLDN1,CXCL10,CXCL12,CYBB,CYP2B6,CYP3A4,CYP4F2,FSCN1,G6PC,GJA1,GSTK1,HIF1A,LHB,LITAF,LPIN1,MMP9,NOS2,NOX4,NR0B2,OAT,PCK1,PFKFB3,PKLR,PPARGC1A,SOD1,STAT1,TP53,UCP2,VCAM1,VIM                                                                                                                    |
| PNPT1                                        |        | enzyme                            | Inhibited | -3,585 | -3,619 | -0,008 | 3,20E-05 | 3,77E-04 | AGRN,CCL5,CDKN1B,CXCL10,DDX58,GBP2,IFI16,IFI44,IFIH1,IFIT3,IRF7,ISG15,LGALS3BP,OAS1,PARP12,RTP4,STAT1,TOR3A,UBE2L6,XAF1                                                                                                                                                                                                           |
| fatty acid                                   |        | chemical - endogenous mammalian   |           | -1,339 | -1,300 | 0,007  | 3,32E-05 | 3,90E-04 | ACACA,ACADL,ACOX1,AHR,AOC1,APOA1,APOC3,BAX,CD36,CDKN1B,DDIT3,DGAT1,G6PC,HSPA5,ITGAM,LEPR,LHB,MACROH2A1,MMP9,NOS2,NR1H3,NR4A1,NR4A3,PLIN2,PPARA,PPARGC1A,PTEEN,RXRA,S100A8,SCD,SLC2A2,ST3GAL5,UCP2,VCAM1                                                                                                                           |
| NEDD9                                        | -0,451 | other                             |           | 0,858  | 0,894  | 0,009  | 3,34E-05 | 3,92E-04 | ADM,ALOX5,AOAH,BHLHE40,BNIP3,FABP1,FOS,ITGA2,MMP2,MMP9,PCK1,PFKP,PLAC8,PLIN2,PLOD2,TXNIP,VIM                                                                                                                                                                                                                                      |
| RORC                                         | -0,757 | ligand-dependent nuclear receptor |           | 1,444  | 1,463  | 0,007  | 3,43E-05 | 4,01E-04 | ACACB,APOA4,ASNS,BHMT,CCL20,CCL5,CCNB1,CD36,CISH,CYP2A6 (includes others),CYP2B6,CYP2C8,CYP4A11,DDC,ELOVL6,G6PC,GADD45B,GSTM4,GSTP1,HIF1A,HPGD,IL1R1,KCNK5,KLRB1,LCN2,NAT8,NNMT,NOCT,NR1I3,NSDHL,PCK1,POR,PPP1R3C,PROCR,RORA,RORC,S100A8,S100A9,SELENBP1,SLC13A2,SLC16A7,SLC25A24,SPARCV,VEGFA,VLDLR                              |
| PDGFB                                        |        | growth factor                     |           | 1,157  | 1,178  | 0,005  | 3,54E-05 | 4,11E-04 | CCN3,COL1A1,COL1A2,FGF1,FGF7,FN1,FOS,FOXO1,FOXO4,ICAM1,MMP2,MMP9,MYL6,NOTCH2,NR4A1,PTEN,SERPINF1,SMAD1,SPP1,STAT3,TIMP1,TNC,VEGFA                                                                                                                                                                                                 |
| miR-21-5p (and other miRNAs w/seed AGCUUAAU) |        | mature microRNA                   | Inhibited | -3,054 | -3,101 | -0,010 | 3,54E-05 | 4,11E-04 | ARF4,CD69,CDH5,FAS,HIPK3,IL6R,IRAK1,LRRFIP1,MARCKS,MMP2,MSH2,MYD88,PDCD4,PECAM1,PTEN,RECK,SMAD7,SPRY1,SPRY2,STAT3,TGFB2,TNFRSF11B,TPM1                                                                                                                                                                                            |
| phosphate                                    |        | chemical - endogenous mammalian   |           | -0,475 | -0,459 | 0,003  | 3,58E-05 | 4,14E-04 | A2M,ACADSB,ACAT1,ALPL,ANKH,AXL,BLVRA,CHST12,COL5A1,CPT2,CYC1,DCN,DECR2,ECSIT,FOSL1,JAK1,MAP2K3,PCCA,PCNA,PLA2G12A,POSTN,SDF2L1,SLC25A5,SLC34A1,SLC34A2,SPP1,STC2,TIMP1,UQCR11,ZFP30                                                                                                                                               |
| PKD1                                         |        | ion channel                       | Inhibited | -3,710 | -3,724 | -0,002 | 3,65E-05 | 4,23E-04 | ABCG2,ACOX2,ADCY7,ALDH8A1,ALG6,APOM,APOO,ATP1B2,AXL,BHMT2,CAVIN1,CPN2,DDIT3,DPEP1,FGFR3,FOSB,FOXO1,G6PC,GATM,GLS,GPRASP1,HGD,IDH1,KNG1,MAP3K12,MCUB,MID1,NEDD9,NNMT,PAH,PCK1,PRLR,PRODH2,PVALB,QPCT,RHOA,SEMA4C,SERPINF2,SFXN3,SLC13A2,SLC16A4,SLC2A2,SLC2A9,SLC4A1,SSTR2,ST5,THG1L,TNFAIP8,TNFRSF11B,TNS1,TREH,TRIM15,VWF,ZBTB10 |
| chenodeoxycholic acid                        |        | chemical - endogenous mammalian   |           | -0,009 | 0,006  | 0,003  | 3,81E-05 | 4,40E-04 | ABCC2,ABCC3,ABCG1,ADH1B,APOA1,APOE,APOM,CAV1,CD36,COL1A1,CYP27A1,CYP3A4,FBP1,G6PC,HNF1A,HNF4A,HPGD,KNG1,MMP9,MTTP,NR0B2,PCK1,PCK2,PKD4,PLTP,PPARA,SDC1,SLC10A2,VDR                                                                                                                                                                |
| ACKR2                                        | -0,064 | G-protein coupled receptor group  | Inhibited | -4,168 | -4,206 | -0,009 | 3,83E-05 | 4,41E-04 | ADAR,CCL5,CCR2,CXCL10,DDX58,DDX60,IFI16,IFI44,IFIT2,IFIT3,IRF7,ISG15,ISG20,OAS1,OAS2,OAS3,RSAD2,STAT1                                                                                                                                                                                                                             |
| TLR2/3/4/9                                   |        | receptor group                    |           | 0,743  | 0,761  | 0,006  | 3,95E-05 | 4,54E-04 | CCR7,CD40,CD58,CD83,CD86,FCGR2B,ICAM1,TREM2                                                                                                                                                                                                                                                                                       |
| NLRP12                                       |        | other                             |           | 1,079  | 1,061  | -0,004 | 4,24E-05 | 4,86E-04 | CASP1,CXCL12,CXCL6,CXCR4,HLA-A,HLA-B,HLA-C,HLA-E,HLA-F,HLA-G,HLA-J,ICAM1,LY96,NOS2,PSMB8,TLR4                                                                                                                                                                                                                                     |
| ATF2                                         |        | transcription regulator           |           | -1,376 | -1,333 | 0,010  | 4,52E-05 | 5,14E-04 | ACTB,APOC3,ASNS,ATF3,BCKDHA,BCL2A1,CCNA2,CCND1,CGA,DDIT3,DUSP1,FN1,FOS,GADD45A,IL13,ITGB8,MAT2A,MEIS2,MMP1,NOS2,NPPA,PCK1,PDGFRA,PLA2G4A,PPARGC1A,PTEN,RHOB,SOD2,SST,VCAM1                                                                                                                                                        |
| LIF                                          | 0,019  | cytokine                          |           | 1,577  | 1,594  | 0,003  | 4,52E-05 | 5,14E-04 | A2M,ACAA2,ACACA,AFP,AHNAK,BMP7,CCNA2,CCND1,CD9,CDH5,CISH,CSF1R,CSHL1,CXCL10,CYFIP1,CYP17A1,DCAF11,ENPP2,ERAP1,EVX1,FBP1,FN1,FOS,GPT,HIF1A,HLA-G,HOXB1,HPSE,IFI16,IL7,IRF1,JAM2,KLRB1,KNG1,MEF2C,MMP1,NKX2-5,NMI,NPPA,PECAM1,PLD1,PRDM14,SERPINA3,SOCS2,SOD2,SPP1,STAT3,TAC1,TIMP1,TNC,TNFRSF11B,TP53,TSPAN7,VEGFA,VWF,WT1,XBP1    |

|                                             |        |                                          |           |        |        |        |          |          |                                                                                                                                                                                                                                                                               |
|---------------------------------------------|--------|------------------------------------------|-----------|--------|--------|--------|----------|----------|-------------------------------------------------------------------------------------------------------------------------------------------------------------------------------------------------------------------------------------------------------------------------------|
| GNAQ                                        |        | enzyme                                   |           | -1,653 | -1,629 | 0,008  | 4,64E-05 | 5,26E-04 | ADAMTS1,ADM,ANXA3,ATF3,BNIP3,BNIP3L,CCND1,CD44,CTSV,CXCL12,DPYS,F2RL1,FOS,GADD45A,GALE,GBP2,GNA11,HSPB8,LHB,NEU1,NFIL3,NOX5,NPPA,NPR3,NR4A1,NR4A3,OAS1,PDE10A,PLSCR1,PRKCD,PYGL,RHOB,SELENBP1,SGK1,STAT1,TNFAIP6,VEGFA                                                        |
| platelet activating factor                  |        | chemical - endogenous mammalian          |           | 1,082  | 1,112  | 0,007  | 4,66E-05 | 5,28E-04 | APOM,CD69,F3,FN1,FOS,ICAM1,IDO1,ITGAM,ITGB2,MMP1,MMP2,MMP9,NOX5,NR4A1,PLA2G7,SELL,SELP,TIMP1,TIMP2,VEGFA,VIM                                                                                                                                                                  |
| glutathione                                 |        | chemical - endogenous mammalian          |           | 1,988  | 1,987  | -0,000 | 4,69E-05 | 5,30E-04 | ABCC1,ALB,ASS1,ATF3,BAX,CCND1,CDKN1B,DDIT3,DLAT,GCLC,GNL3,GPX3,HIF1A,MAPK8,MET,NDRG1,PCNA,SOD2,SP3,STAT3,TNC,VCAM1,VEGFA,ZBTB10                                                                                                                                               |
| IGF2BP1                                     |        | translation regulator                    | Activated | 3,532  | 3,561  | 0,008  | 4,88E-05 | 5,48E-04 | ACTB,BIRC2,CD44,COL1A1,COL1A2,COL5A1,COL6A3,CYFIP2,KRAS,LGALS1,LUM,PTEN,TNC                                                                                                                                                                                                   |
| IRS1                                        | -0,031 | enzyme                                   |           | -0,479 | -0,468 | 0,004  | 5,08E-05 | 5,68E-04 | ACACA,ACTR3,CCND1,CDKN2C,COL3A1,COL4A1,COL4A2,COL6A3,DBN1,DDIT3,EFNB2,FHL1,FMO1,FOS,G6PC,GAS2,GJA1,GLRB,ID2,IGFBP4,INSR,MAPK12,MEF2C,NDN,NRP1,PCK1,PHB,PPARGC1A,PTPRF,SIGLEC1,SPP1,TGFB1,TNNC1,TNNI1,TNNT2,TRIB3,UCP2,VEGFA                                                   |
| HMGB1                                       |        | transcription regulator                  | Activated | 2,321  | 2,360  | 0,008  | 5,14E-05 | 5,75E-04 | BAX,CASP3,CCL20,CCNG1,CD163,CD40,CD58,CD83,CD86,CKM,CXCL6,GLUL,HIF1A,HLA-DRB1,HLA-G,ICAM1,IL1R1,INSR,MMP1,MMP9,MOK,MRC1,MX1,PTGES,SMAD7,TLR2,TLR4,VCAM1                                                                                                                       |
| ADRB                                        |        | group                                    |           | -1,655 | -1,676 | -0,003 | 5,32E-05 | 5,94E-04 | ADGRL4,ANXA5,ATF3,AXL,BAX,BHLHE40,BNIP3,BNIP3L,CASP3,CASP4,CASP6,CCNA2,CCND1,CD40,CDC7,CDKN1B,CXCL10,DDIT3,FAS,FOS,GADD45A,GCLM,GSTA3,ICAM1,IDH1,IFIT3,LPIN1,MMP9,MMSO1,NCL,NOS2,NOTCH2,NPPA,NR4A1,NR4A3,NSDHL,PCNA,PCYT2,PPARGC1A,PPM1D,RSAD2                                |
| let-7a-5p (and other miRNAs w/seed GAGGUAG) |        | mature microRNA                          | Inhibited | -2,187 | -2,251 | -0,010 | 5,37E-05 | 5,99E-04 | ADGRG1,AGO4,BCL7A,CAPG,CARHSP1,CASP3,CCND1,CCND2,COL1A1,COL1A2,COL3A1,DICER1,EIF4G2,GAK,GYS1,IFIT5,IFRD1,ITGB3,KRAS,KRT19,MMP9,MRPS33,MTRR,NXN,PGRMC1,PRIM1,PXDN,RHOB,RHOG,RTCA,S100A4,SCD,SLC25A1,SLC25A13,SLC25A24,SLC25A32,SLC38A1,SMAD2,SPCS3,STAT3,TGFBR3,TLR4,TRMT1,VIM |
| HNF4α dimer                                 |        | complex                                  | Inhibited | -2,979 | -2,950 | 0,010  | 5,53E-05 | 6,09E-04 | ALDOB,FABP1,FABP2,FBP1,HNF1A,PCK2,PKLR,SLC22A7,SLC2A2                                                                                                                                                                                                                         |
| IFNA10                                      | 0,265  | cytokine                                 | Activated | 2,744  | 2,771  | 0,010  | 5,53E-05 | 6,09E-04 | CCL8,CXCL10,CXCL11,CXCL9,IFIH1,ISG15,MX1,PLAAT4,STAT4                                                                                                                                                                                                                         |
| IFNA21                                      | -0,136 | cytokine                                 | Activated | 2,737  | 2,764  | 0,010  | 5,53E-05 | 6,09E-04 | CCL8,CXCL10,CXCL11,CXCL9,IFIH1,ISG15,MX1,PLAAT4,STAT4                                                                                                                                                                                                                         |
| IFNA5                                       | -0,131 | cytokine                                 | Activated | 2,744  | 2,771  | 0,010  | 5,53E-05 | 6,09E-04 | CCL8,CXCL10,CXCL11,CXCL9,IFIH1,ISG15,MX1,PLAAT4,STAT4                                                                                                                                                                                                                         |
| IFNA7                                       | -0,104 | cytokine                                 | Activated | 2,744  | 2,771  | 0,010  | 5,53E-05 | 6,09E-04 | CCL8,CXCL10,CXCL11,CXCL9,IFIH1,ISG15,MX1,PLAAT4,STAT4                                                                                                                                                                                                                         |
| IFNA14                                      |        | cytokine                                 | Activated | 2,744  | 2,771  | 0,010  | 5,53E-05 | 6,09E-04 | CCL8,CXCL10,CXCL11,CXCL9,IFIH1,ISG15,MX1,PLAAT4,STAT4                                                                                                                                                                                                                         |
| CSF3R                                       | 0,072  | transmembrane receptor                   |           | -0,574 | -0,577 | -0,002 | 5,53E-05 | 6,09E-04 | CD14,CDKN1B,CEBPE,CISH,CXCL12,FOS,ITGAM,LTF,LYZ                                                                                                                                                                                                                               |
| IFNA6 advanced glycation end-products       |        | cytokine chemical - endogenous mammalian | Activated | 2,744  | 2,771  | 0,010  | 5,53E-05 | 6,09E-04 | CCL8,CXCL10,CXCL11,CXCL9,IFIH1,ISG15,MX1,PLAAT4,STAT4                                                                                                                                                                                                                         |
| SEMA7A                                      | -0,056 | transmembrane receptor                   | Activated | 2,857  | 2,891  | 0,010  | 5,58E-05 | 6,11E-04 | ABCG1,BAX,CASP3,CASP8,CXCL12,FN1,FOXO1,GJA1,MMP1,MMP9,NOS2,PFN1,PTGES,ROBO1,SERPINF1,SLIT2,SPP1,VCAM1                                                                                                                                                                         |
| ALDH2                                       | -0,584 | enzyme                                   | Activated | 2,925  | 2,891  | -0,010 | 5,58E-05 | 6,11E-04 | BAX,CCN3,CCNA2,COL1A1,COL1A2,COL3A1,CTSB,CTSS,FN1,IL18,IL4R,TIMP1                                                                                                                                                                                                             |
| C5                                          | -0,271 | cytokine                                 |           | 1,780  | 1,809  | 0,005  | 5,62E-05 | 6,14E-04 | CTH,GCLC,GCLM,GNMT,GSS,GSTA3,MTHFD2,PHGDH,PSAT1,SHMT1,SHMT2,SLC3A2                                                                                                                                                                                                            |
| PELP1                                       |        | other                                    |           | -0,825 | -0,814 | 0,003  | 5,62E-05 | 6,14E-04 | ATF3,BCL6,CCL5,CCND1,CD55,CD59,CD63,CD86,CDH11,CXCL1,CXCL10,CYBB,CYP3A4,EFNB2,F3,FCGR2B,FN1,HSPA5,ICAM1,IFNGR2,IL13,ITGAM,ITGB2,MET,MMP1,MMP9,NFE2L2,NFKB1,NGF,PPP1R15A,SMAD7,ST6GAL1,TNFAIP2,VCAM1,VEGFA,VEGFC,ZFP36                                                         |
| IFI16                                       | 1,554  | transcription regulator                  | Activated | 2,140  | 2,183  | 0,009  | 5,72E-05 | 6,23E-04 | ADA,ADRB2,ARMCX1,ASNS,BCAS3,CCND1,CXCL1,DAB2,EGF,F12,FGFR3,FOS,FYN,G0S2,GCA,IFI44,KRT81,KYNU,LCP1,MMP2,MMP9,MRAS,MRC1,NDRG1,NIBAN1,PPARGC1A,PRKCQ,PRSS3,PSAT1,PTEN,PTGES,RBP1,S100A9,SLPI,SNCG,TCN2,ZGPAT                                                                     |
| lysophosphatidylinositol                    |        | chemical - endogenous mammalian          | Activated | 2,480  | 2,524  | 0,010  | 5,95E-05 | 6,45E-04 | BAX,CCL20,CCL5,CCND1,CD81,CDKN1B,CGA,CXCL10,DDX58,ESR1,GADD45A,ICAM1,ID2,IFI16,IL2RB,IL7R,ISG15,MIF,MTHFD2,NKX2-5,NPPA,OAS1,PCNA,RPA3,SOD1,VCAM1                                                                                                                              |
|                                             |        |                                          |           |        |        |        |          |          | C3,CASP1,CD36,CD74,CFB,CXCL6,F3,FPR1,GLS,GLUL,HLA-DRB1,ICAM1,IL15,IL33,LTB,PLCE1,SOD2,TG,TLR3                                                                                                                                                                                 |

|                                    |        |                                 |           |        |        |          |          |                                                                                                                                                                                                                                                                                                                                                                                                                                |                                                                                                                                                                                                                 |
|------------------------------------|--------|---------------------------------|-----------|--------|--------|----------|----------|--------------------------------------------------------------------------------------------------------------------------------------------------------------------------------------------------------------------------------------------------------------------------------------------------------------------------------------------------------------------------------------------------------------------------------|-----------------------------------------------------------------------------------------------------------------------------------------------------------------------------------------------------------------|
| HDL                                |        | complex                         | -0,966    | -0,977 | -0,002 | 5,95E-05 | 6,45E-04 | ABCG1,ATF3,CCL5,CCR2,CD40,CD86,CX3CR1,DDIT3,HIF1A,HSPA5,ICAM1,ITGAM,ITGAV,ITGB2,ITGB3,MYD88,RAC1,SELP,VCAM1                                                                                                                                                                                                                                                                                                                    |                                                                                                                                                                                                                 |
| WWTR1                              | -0,167 | transcription regulator         | 1,102     | 1,118  | 0,004  | 5,95E-05 | 6,45E-04 | CCNA2,CD44,CKM,COL1A1,CXCL1,DTYMK,FN1,GJA1,ICAM1,ID2,ITGB2,LAMA5,NPPA,RRM1,RRM2,SMAD7,SPP1,THY1,VCAM1                                                                                                                                                                                                                                                                                                                          |                                                                                                                                                                                                                 |
| miR-296-5p (miRNAs w/seed GGGCCCC) |        | mature microRNA                 | -0,880    | -0,913 | -0,010 | 6,08E-05 | 6,58E-04 | BAX,CCND1,CDKN1B,COL1A1,KLK1,MAP2K3,MMP1,PCNA,TNC,TP53,VEGFA                                                                                                                                                                                                                                                                                                                                                                   |                                                                                                                                                                                                                 |
| QKI                                |        | other                           | 0,923     | 0,923  | 0,000  | 6,16E-05 | 6,62E-04 | CSF1R,DACT1,ERCC2,HNRNP,ITGB8,MACROH2A1,PEA15,TNC,VCAM1,VIM                                                                                                                                                                                                                                                                                                                                                                    |                                                                                                                                                                                                                 |
| F3                                 | -0,574 | transmembrane receptor          | 1,892     | 1,936  | 0,010  | 6,17E-05 | 6,62E-04 | DUSP9,EFEMP1,F3,FERMT2,FGF13,FOS,GJA1,ICAM1,ITGA2,ITGAM,KRAS,LAMB1,LCP1,MDK,MMP2,MMP7,MMP9,RAC1,RHOA,SERPINC1,SPRY1,TGFB2,VCAM1,VEGFA                                                                                                                                                                                                                                                                                          |                                                                                                                                                                                                                 |
| PLAU                               | 0,344  | peptidase                       | Activated | 2,059  | 2,078  | 0,004    | 6,17E-05 | 6,62E-04                                                                                                                                                                                                                                                                                                                                                                                                                       | ABCG1,ANG,CCL5,CCND1,CCR5,F3,FN1,GJA1,HLA-DMA,HSPA5,ICAM1,IFNAR2,ITGAV,MMP1,MMP9,OAS1,OAS3,PLG,S100A8,S100A9,SERPINB1,SLPI,TP53,VIM                                                                             |
| MAP3K14                            | -0,082 | kinase                          | Activated | 2,758  | 2,797  | 0,008    | 6,17E-05 | 6,62E-04                                                                                                                                                                                                                                                                                                                                                                                                                       | BIRC3,BST1,CCL5,CD44,CXCL1,FAS,GADD45A,ICAM1,IL13,IL15,IL7R,LTB,MMP9,NFKB1,NFKBIE,NOS2,PLA2G4A,PON2,PTEN,RCAN1,TNFAIP6,TNFSF10,VCAM1,XBP1                                                                       |
| mir-1                              |        | microRNA                        | Inhibited | -3,658 | -3,703 | -0,008   | 6,18E-05 | 6,63E-04                                                                                                                                                                                                                                                                                                                                                                                                                       | ADAR,ANP32B,ANXA2,CACNB2,CAP1,CAPRIN1,CASP3,CCND2,CDK14,CXCL1,DHX15,ESR1,FN1,GJA1,HNRNPA3,HSP90B1,KIF2A,KRAS,MET,MMP9,NELFCD,PDCD4,PPIB,SFRP1,SH3BGLR3,SLC25A1,SMARCA4,TAGLN2,TMX1,TNNT2,UTRN,VEGFA,VEGFC,WBP1L |
| MMP12                              | 0,243  | peptidase                       |           | 1,052  | 1,067  | 0,008    | 6,32E-05 | 6,76E-04                                                                                                                                                                                                                                                                                                                                                                                                                       | ACTN1,ACTR2,ACTR3,ARPC1B,CAPZA2,CCL5,CCT5,CORO1C,DNM1L,FSCN1,HNF4A,MMP2,MMP9,MYH9,PGM1,PKM,PLS3,PSMA6,PSMB7,PSMD1,RDX,TLN2,YWHAH                                                                                |
| S-adenosylmethionine               |        | chemical - endogenous mammalian |           | -0,521 | -0,543 | -0,006   | 6,39E-05 | 6,81E-04                                                                                                                                                                                                                                                                                                                                                                                                                       | ACACA,ADIPOR1,BACE1,COL1A1,COL1A2,FOS,GCLC,GCLM,ITGAL,MAF,MAT2A,NOS2,PHB,PPARGC1A,PRMT1,RAC1                                                                                                                    |
| ISGF3                              |        | complex                         | 1,945     | 1,964  | 0,010  | 6,40E-05 | 6,81E-04 | HIF1A,IFIH1,IFIT2,IRF7,ISG15,RSAD2,TNFSF10                                                                                                                                                                                                                                                                                                                                                                                     |                                                                                                                                                                                                                 |
| EIF3A                              | 0,153  | other                           | -0,286    | -0,301 | -0,006 | 6,40E-05 | 6,81E-04 | CDKN1B,ISG15,NDRG1,RPA1,RPA2,RPA3,XPC                                                                                                                                                                                                                                                                                                                                                                                          |                                                                                                                                                                                                                 |
| MLXIPL                             | -0,427 | transcription regulator         | -0,632    | -0,601 | 0,008  | 6,61E-05 | 7,02E-04 | ACACA,ACACB,ELOVL6,G6PC,GPD1,HIF1A,KHK,PKLR,PPARA,PYGL,SCD,SLC2A2,TKFC,TXNIP                                                                                                                                                                                                                                                                                                                                                   |                                                                                                                                                                                                                 |
| Mapk                               |        | group                           | -1,020    | -0,979 | 0,009  | 6,78E-05 | 7,18E-04 | ADA,APOA1,APOC3,ARC,CAT,CCND1,CDKN1B,COL1A1,CXCL1,CYBB,ESR1,F3,FOS,GJA1,GZMB,HPGD,MMP7,MMP9,NOS2,NR113,NR4A3,PER1,PIGR,PRF1,PRKCZ,PTEN,S100A8,SNCG,SOD1,SPP1,STAT1,VCAM1,VEGFA                                                                                                                                                                                                                                                 |                                                                                                                                                                                                                 |
| GAST                               | -0,113 | other                           | 1,695     | 1,737  | 0,008  | 6,95E-05 | 7,34E-04 | ABCC2,CCND1,COX5B,DLAT,FOS,HMGB2,IMPDH2,MCM3,MDH2,MMP7,MMP9,PHB,PLA2G7,POR,PRDX3,RAC1,REG1A,RHOA,RPL35A,RPS19,RUNX3,S100A6,SELP,SLC9A3,STAT3,TNC,VCAM1                                                                                                                                                                                                                                                                         |                                                                                                                                                                                                                 |
| NFYB                               | 0,179  | transcription regulator         | -0,143    | -0,124 | 0,010  | 7,11E-05 | 7,50E-04 | ABCG2,ACTB,APOBEC3B,ARID4B,CACNA2D3,CAPN3,CAV1,CCNB1,CCNB2,CCT6B,CDK1,CHPT1,CLDN15,COL1A1,COL1A2,CYTIP,DDIT4,ENTPD7,FAM214B,FAM49B,FAS,FRYL,G6PC,GADD45A,HLA-DQB1,HLA-DRA,HMGB2,HMGN3,ITM2C,KIAA0930,KLHL3,L2HGDH,LPIN1,MET,TL9,MSRA,OAT,OGG1,PAQR5,PCK1,PCLAF,PCNA,PDIA4,PGRMC1,PRRG2,PSMB7,PTPN6,PTTG1,PXMP4,RHCE/RHD,RHOB,RNPS1,RRM2,S100A4,SLC25A28,ST8SIA4,TGFB2,TJP1,TM7SF3,TMBIM6,TMEM87A,TP2A,TPM1,VIM,VWF,YBX3,ZNF468 |                                                                                                                                                                                                                 |
| NFATC2                             |        | transcription regulator         | 1,144     | 1,172  | 0,004  | 7,36E-05 | 7,72E-04 | ACP5,CASP3,CASP4,CCL5,CCNA2,CCNB1,CCR5,CCR7,CD3G,CD40,CD83,CD86,CISH,CX3CR1,CXCL10,DAB2,ENPP2,FAS,FGL2,GNMB,HDAC1,IFIT2,IFIT3,IL13,IL15,IL18,IRF1,IRF7,ISG15,ISG20,MAF,NFKB1,NMI,NOX4,NR4A1,PDZD5,PDZD2,PLD1,PLK2,PPARGC1A,PTPRK,RCAN1,RORC,RSAD2,SLC3A2,SLCO3A1,SOCS2,STAT1,TCF4,TERT,TLR2,TLR3,TSC22D1                                                                                                                       |                                                                                                                                                                                                                 |
| CTSS                               | 1,628  | peptidase                       | 1,946     | 1,961  | 0,005  | 8,05E-05 | 8,40E-04 | BID,CASP3,CASP8,COL4A1,COL4A2,CTSK,CTSV,FAS,ITGA7,MMP9,PRKCD,TNFSF10,UTRN                                                                                                                                                                                                                                                                                                                                                      |                                                                                                                                                                                                                 |
| CCR1                               | 0,293  | G-protein coupled receptor      | 1,489     | 1,505  | 0,004  | 8,05E-05 | 8,40E-04 | CCL5,CTSK,CTSS,CTSV,FOS,ITGAM,ITGAV,ITGB3,MMP2,MMP9,SPARC,SPP1,VIM                                                                                                                                                                                                                                                                                                                                                             |                                                                                                                                                                                                                 |
| ceramide                           |        | chemical - endogenous mammalian | 0,743     | 0,754  | 0,003  | 8,05E-05 | 8,40E-04 | BAX,CASP1,CASP3,CD1D,COL1A1,FOS,GSTA1,ICAM1,MMP1,NAT8,NAT8B,SFRP1,TP53                                                                                                                                                                                                                                                                                                                                                         |                                                                                                                                                                                                                 |
| BMI1                               |        | transcription regulator         | 0,951     | 0,943  | -0,003 | 8,33E-05 | 8,66E-04 | AURKA,BNIP3,CASP8,CD63,CDKN1B,CUL1,CYFIP2,DNMT1,FAS,GILPR1,IL36A,MCM3,MET,NFKB1,P4HA1,RRM1,SFN,TERT,TP53,TUSC3,VEGFC,VIM,WNT10B                                                                                                                                                                                                                                                                                                |                                                                                                                                                                                                                 |

|                 |       |                                   |           |                  |                  |                 |                      |                                                                                                                                                                                                                                                                                                                                                                      |                                                                                                                                                                        |
|-----------------|-------|-----------------------------------|-----------|------------------|------------------|-----------------|----------------------|----------------------------------------------------------------------------------------------------------------------------------------------------------------------------------------------------------------------------------------------------------------------------------------------------------------------------------------------------------------------|------------------------------------------------------------------------------------------------------------------------------------------------------------------------|
| FLI1            | 0,396 | transcription regulator           | 0,346     | 0,373            | 0,006            | 8,52E-05        | 8,84E-04             | ADGRG1,CCL5,CCND1,CCND3,COL1A1,COL1A2,CSF1R,CXCL10,DNMT1,FLI1,HBB,HSPA8,ID2,INPP5D,MMP1,NEU1,RACK1,SNRPB,SRGN,TGFBR2,TNC,VEGFA                                                                                                                                                                                                                                       |                                                                                                                                                                        |
| SERPINF1        | 0,833 | other                             | 0,308     | 0,305            | -0,001           | 8,59E-05        | 8,89E-04             | BAX,BCL2A1,BID,CCND1,CDH5,CYBA,CYBB,G0S2,LOXL1,NFKB1,NOS2,PDGFRA,PPARGC1A,SELP,SERPINF1,SOD2,TJP1,TNFRSF11B,TNFSF10,VIM                                                                                                                                                                                                                                              |                                                                                                                                                                        |
| SIM1            | 0,127 | transcription regulator           | -0,026    | 0,044            | 0,009            | 8,73E-05        | 9,03E-04             | ABCG1,AKR1B1,ANG,AOX1,APOE,ARNT2,AVP,BST1,CBFB,CCS,CD86,CDH3,CELF2,CLCN1,COPZ2,CRISP2,CYBA,EGF,ELL2,FHIT,FKBP3,FNBP1,GLUL,GPX3,GSTA3,GZMH,HLA-A,ICAM1,IFI16,IGFBP4,IL6R,ITGB3,LCP1,LRRFIP1,LTF,MCM7,OXT,PDLIM4,PEA15,PFN1,POSTN,RGS10,SELENBP1,SERPINA5,SLC12A3,SLC17A1,SNN,SNX5,SST,TACR2,THRB,TYK2,TYROBP,USP2,ZDHHC14                                             |                                                                                                                                                                        |
| GATA3           | 0,178 | transcription regulator           | -1,665    | -1,659           | 0,001            | 9,12E-05        | 9,42E-04             | ACBD4,ADM,AURKAIP1,BCAS3,BCL11A,BHLHE41,BLVRB,CCL5,CCND1,CCR2,CCR5,CD3D,CDKN2C,CDX2,CPA3,CSF1R,CST6,CXCR4,ELOVL6,ESR1,EVPL,FN1,FOS,FSCN1,GLUL,GZMA,ICAM1,IL13,IL2RB,IL7R,ITGAL,ITK,LAIR1,LOC102724788/PRODH,LTB,MAF,NFIL3,NFKB1,NKG7,NOTCH2,NPPA,OVOL1,PCNA,PPARA,PPL,PTGS1,RCAN1,RUNX3,S100A8,S100A9,SGPP1,SLC27A2,SLPI,SP110,STAT4,TJP1,VCAM1,VIM,XBP1,ZBTB7B,ZEB2 |                                                                                                                                                                        |
| NR2F2           | 0,354 | ligand-dependent nuclear receptor | -0,228    | -0,228           | 0,000            | 9,43E-05        | 9,71E-04             | ALDH2,APOA1,APOA4,APOC3,EFNB2,HNF1A,HNF1B,HNF4A,LTF,NPPA,NR2F2,NRP1,PCK1,PPARA,SHBG,VEGFA                                                                                                                                                                                                                                                                            |                                                                                                                                                                        |
| NR1D1           | 0,128 | ligand-dependent nuclear receptor | 1,609     | 1,609            | 0,000            | 9,43E-05        | 9,71E-04             | ACACA,APOC3,BNIP3,CTSV,EHHADH,FOS,G6PC,ME1,MEF2C,NAMPT,PDE8A,RGR,RORC,STAT1,TLR4,ULK1                                                                                                                                                                                                                                                                                |                                                                                                                                                                        |
| lkb             |       | receptor group                    | Activated | 2,354            | 2,377            | 0,008           | 9,56E-05             | 9,81E-04                                                                                                                                                                                                                                                                                                                                                             | BLVRA,CCNB1,CCND1,CFB,HHEX,HSPA5,ICAM1,MAT2A,MMP1,NFKB1,NR4A1,PTEN                                                                                                     |
| TCF             |       | group                             |           | -0,292           | -0,273           | 0,010           | 9,56E-05             | 9,81E-04                                                                                                                                                                                                                                                                                                                                                             | ALDH3A2,CCND1,CD44,CNN2,CRAF,DPEP1,FOS,GAD1,GJA1,HTRA1,ID3,IDO1,IFITM1,IHH,IL1R1,MME,MMP2,MMP7,PCCA,PLS3,QPCT,SERPINA3,SERPINA5,SFN,SLC1A5,SLC26A2,TSC22D1,TSPAN8,UGCG |
| Integrin<br>TOX | 0,284 | group<br>transcription regulator  | Inhibited | -2,214<br>-1,140 | -2,236<br>-1,135 | -0,010<br>0,002 | 9,66E-05<br>9,66E-05 | 9,84E-04<br>9,84E-04                                                                                                                                                                                                                                                                                                                                                 | ITGAL,ITGAM,ITGB2,TLR2,TLR4<br>CDKN1B,CDKN1C,FOXO1,ID2,ZBTB7B                                                                                                          |
| SEMA3F<br>VCAM1 | 1,222 | other<br>transmembrane receptor   |           | -0,829<br>0,980  | -0,849<br>1,000  | -0,010<br>0,010 | 9,66E-05<br>9,66E-05 | 9,84E-04<br>9,84E-04                                                                                                                                                                                                                                                                                                                                                 | HIF1A,MMP2,MMP9,TP53,VEGFA<br>ABCG2,CCND1,CD44,MMP9,VCAM1                                                                                                              |
| myristic acid   |       | chemical - endogenous mammalian   |           | -1,430           | -1,408           | 0,010           | 9,66E-05             | 9,84E-04                                                                                                                                                                                                                                                                                                                                                             | F2RL1,NR1H2,NR1H3,PLIN2,RXRA                                                                                                                                           |

Table S3. Olive

| Upstream Regulator | Expr Log Ratio | Molecule Type                   | Predicted Activation State | Bias-corrected z-score | Activation z-score | Bias Term | p-value of overlap | B-H corrected p-value | Target Molecules in Dataset                                                                                                                                                                                                                                                                                                                                                                                                                                                                                                                                                                                                                                                                                                                                                                                   |
|--------------------|----------------|---------------------------------|----------------------------|------------------------|--------------------|-----------|--------------------|-----------------------|---------------------------------------------------------------------------------------------------------------------------------------------------------------------------------------------------------------------------------------------------------------------------------------------------------------------------------------------------------------------------------------------------------------------------------------------------------------------------------------------------------------------------------------------------------------------------------------------------------------------------------------------------------------------------------------------------------------------------------------------------------------------------------------------------------------|
| PDGF BB            |                | complex                         | Inhibited                  | -7,802                 | -6,166             | 0,249     | 2,07E-21           | 9,92E-18              | ADD3,ATF3,BDKRB2,CCN2,CCNL1,CDKN1A,CDKN1B,CEBPB,CEBPD,CXCL2,DAB2,DUSP1,DUSP5,DUSP6,EDN1,EGR1,EGR3,ETS2,F3,FOS,FOSB,GADD45A,GDF15,GEM,GPR183,HBEGF,HES1,IER2,IER3,JUN,JUNB,KLF6,LDLR,MCL1,NR4A1,NR4A3,PIM1,PPP1R15A,RGS2,RHOB,RND3,SERPINE1,SGK1,TNFAIP3,TRIB1,ZFP36                                                                                                                                                                                                                                                                                                                                                                                                                                                                                                                                           |
| HNF4A              | -0,036         | transcription regulator         |                            | -0,252                 | 0,167              | 0,095     | 5,77E-21           | 1,38E-17              | ABCG1,ABHD6,ACP2,ACVR1,AGA,AK2,ALDH8A1,APOE,ARMC1,ARMT1,ATOX1,ATP10A,AVP11,BET1,C2orf42,CALML4,CCDC90B,CCNA2,CNG2,CDC123,CDC23,CDK8,CDKN1A,CDKN1B,CEBPB,CEBPD,CETN2,CETN3,CHI3L1,COPB2,CPT2,CSTF2T,CTSA,CUL5,DBT,DUSP6,DYNC1L1,E2F4,ECD,EGR1,EPHA2,FANCF,FOSL2,FRK,FYCO1,GADD45B,GATA6,GDF15,GIN1,GLCE,GNAI3,GNS,GTTF2H1,H2BC5,HBEGF,JUN,JUNB,LARS2,LDAH,LDLR,LIPT1,LPCAT3,LRRC40,LSM5,MAP7,METTL18,MFSD1,MTMR4,MTTP,NAT8,NBR1,NOC3L,NR0B2,NSF,NSL1,NUP54,OGA,PCDC10,PKD4,PDSS2,PEX12,PEX3,PHKB,PIK3R3,PMS1,POPF5,PPCS,PPFIBP2,PPP1R3C,PPP2R3C,PSMD1,PTGDS,R3HDM1,RASA1,RBM7,RIOK3,RTCA,SAP18,SERPINE1,SGK1,SLC25A13,SLC35A5,SMARCA5,SMARCE1,SNAP23,SPATA5L1,SREBF2,STAM,STAMP,SULT1C2,SYNPO,TAOK3,TDP2,TFB2M,THAP1,TIMP3,TMEM140,TNFRSF11B,TPRKB,TRMT1L,UBE2B,UTP14C,WDR12,ZBTB11,ZC3H15,ZFP36,ZNF146,ZNF277 |
| beta-estradiol     |                | chemical - endogenous mammalian | Inhibited                  | -3,916                 | -2,639             | 0,138     | 2,92E-17           | 3,77E-14              | ABCA1,AIF1,APOE,ARMT1,ATF3,BACE2,BTG2,CCL4,CCN2,CCNA2,CNG2,CDC123,CDC23,CDKN1A,CDKN1B,CDKN1C,CEBPB,CEBPD,CHEB,CHI3L1,CITED2,CNN2,CRNKL1,CSE1L,CXCL2,DAB2,DRG1,DUSP1,DUSP5,DUSP6,EDN1,EGR1,EGR3,ERBB3,F3,FABP3,FMR1,FOS,FOSB,FOSL2,FRK,GADD45A,GADD45B,GEM,GMFB,GNS,GPR137B,GP5A,HBB,HBEGF,HES1,IER2,IER3,IL4R,IL6R,JUN,JUNB,JUND,KLF4,KLF6,KLF9,KPNA4,LDLR,MTMR4,MTTP,NARS1,NEDD9,NFKBIA,NROB2,NR3C1,NR4A1,NR4A3,PKD4,PIK3C2A,PIK3R3,PPP1R15A,PPP1R3C,PROS1,PTGDS,PTGER4,PTP4A1,RARS1,RBBP8,RFC4,RGS16,RGS2,RGS3,RND3,SERPINE1,SGK1,SLC20A1,SOC2,SPOCK2,SPRY2,STX3,SULT1C2,SYNPO,TACSTD2,TBL1XR1,THSD4,TIMP3,TNFAIP3,TNFRSF11B,TNFSF8,TNNT2,TRIB1,TSC22D3,UBE2B,USP8,VAMP2,VAV3,ZFP36,ZNF38                                                                                                                   |
| KRAS               | -0,016         | enzyme                          |                            | -1,104                 | -1,097             | 0,001     | 2,80E-14           | 1,34E-11              | ABCA1,AMPH,ATF3,ATG5,CAVIN2,CCN2,CCNA2,CDKN1A,CDKN1B,CEBPB,CHI3L1,CHSY1,COL4A3,CSE1L,DDAH1,DUSP1,DUSP5,DUSP6,E2F4,EGR1,EI24,EPHA2,F3,FOS,FOSB,GADD45A,HBEGF,HES1,IER3,JUN,JUNB,KLF6,LIPG,NFKBIA,NR3C1,NR4A1,NSF,PIM1,PLA1A,RAB20,RBM7,RHOB,SERPINE2,SLC20A1,SLCO4A1,SPRY2,SREBF2,TIMP3,TNFRSF11B,TRIB1                                                                                                                                                                                                                                                                                                                                                                                                                                                                                                        |
| TGFB1              |                | growth factor                   | Inhibited                  | -5,116                 | -3,997             | 0,133     | 7,73E-14           | 3,08E-11              | ABCA1,ABCG1,ACVR1,APOE,ATG14,ATG5,BDKRB2,CALML4,CAVIN2,CCL4,CCN2,CCNA2,CCNG2,CCT6A,CDKN1A,CDKN1B,CDKN1C,CEBPB,CHI3L1,CITED2,CNN2,CSR1,CTCF,CUL5,CXCL2,DAB2,DTX4,DUSP1,EDN1,EGR1,EGR3,EPHA2,F3,FERMT2,FILIP1L,FOS,FOSB,FOSL2,GADD45A,GADD45B,GDF15,GEM,GIN1,GLCE,GLS,GNS,GPRC5A,HBEGF,HES1,IER2,IER3,IFIH1,IL4R,IL6R,ITPR2,JUN,JUNB,JUND,KLF4,KLF9,LDLR,LIPT1,LPCAT3,LSM5,MYO1C,NAB2,NEDD9,NFKBIA,NOC3L,NR4A1,NR4A3,OARD1,OGA,PCOLCE2,PIM1,PLA1A,PPFIBP2,PPID,PPP1R3C,PSMD1,PSPH,PTGDS,PTGER4,RASA1,RFC4,RHOB,SERPINE1,SERPINE2,SGK1,SLC20A1,SLC35A5,SMC4,TIMP3,TNFAIP3,TNFRSF11B,TNNT2,TSC22D3,WDFY3,ZFP36                                                                                                                                                                                                    |
| TP53               | 0,072          | transcription regulator         | Inhibited                  | -3,925                 | -3,512             | 0,048     | 4,16E-13           | 1,33E-10              | ACP2,ADD3,AKAP9,APOE,ATF3,BDKRB2,BTG2,CAND1,CASP6,CCL4,CCN2,CCNA2,CCNG2,CCNL1,CDK7,CDKN1A,CDKN1B,CEBPB,CEBPD,CITED2,CKAP2,CNN2,COX15,CPT2,CSR1,DBT,DRAM1,DUSP1,DUSP2,DUSP5,DUSP6,E2F4,EDN1,EGR1,EGR3,EI24,EIF2B1,EPHA2,F3,FABP3,FERMT2,FOS,GADD45A,GADD45B,GAS6,GATA6,GDF15,GTTF2H1,H2BC5,HBEGF,IER3,IL4R,JUN,JUNB,JUND,KLF4,KLF6,LDLR,LIAS,MAP3K4,MCL1,MIS18A,MYL9,MYO1C,MYO6,NARS1,NFKBIA,NR0B2,PDHX,PDSS2,PIK3R3,PIM1,PPP1R15A,PSMD1,PTGDS,PTP4A1,RB1CC1,RFC4,RGS16,RHOB,RND3,RPE,SERPINE1,SERPINE2,SGK1,SLC25A13,SMC4,SOC2,STAMP,TDP2,TFB2M,TIMP3,TLR3,TNFAIP8,TSC22D3,UBR2,VDAC3,XPNPFP1,ZFP36,ZNF84                                                                                                                                                                                                     |
| Raf                |                | group                           | Inhibited                  | -2,773                 | -2,395             | 0,158     | 6,13E-13           | 1,72E-10              | CDKN1A,CDKN1B,DUSP6,EDN1,EGR1,FOS,GDF15,IER2,IER3,JUN,MAFF,MCL1,RND3,SLC20A1,SPRY2,SPRY4,TNFAIP3                                                                                                                                                                                                                                                                                                                                                                                                                                                                                                                                                                                                                                                                                                              |
| PRKCD              | -0,183         | kinase                          | Inhibited                  | -3,854                 | -2,879             | 0,198     | 1,92E-12           | 4,59E-10              | ABCA1,CCNA2,CDKN1A,CEBPB,DUSP6,ETS2,FOS,FOSL2,GDF15,GEM,GPRC5A,JUN,JUNB,KLF6,LDLR,LIPG,MCL1,NEDD4,NES,NFKBIA,NR0B2,NR4A1,PPP1R15A,SERPINE1,TNFRSF11B,ZFP36                                                                                                                                                                                                                                                                                                                                                                                                                                                                                                                                                                                                                                                    |
| NUPR1              | 0,161          | transcription regulator         | Inhibited                  | -4,523                 | -5,337             | -0,124    | 2,63E-12           | 5,99E-10              | ANK3,ATF3,ATR,AVP11,BRCC3,CCNA2,CDC23,CDKN1B,CEBPB,CITE2,CSTF2T,DUSP5,ELL2,GADD45A,GDF15,HBEGF,IL6R,JOSD1,KLF4,KLF6,LARS2,MRS2,MRTFB,NSF,NSL1,OSGEPL1,PCTP,PEX12,PIM1,PLK3,PPFIBP2,PPP1R15A,PPWD1,RAB20,RAB29,RPA1,SERPINE1,STK38,STX3,SUOX,TRIB1,UEVLD,VPS45                                                                                                                                                                                                                                                                                                                                                                                                                                                                                                                                                 |



|       |        |                                   |           |        |        |        |          |          |                                                                                                                                                                                                                                                                                                                                                                                                                                                                                                                                                                                         |
|-------|--------|-----------------------------------|-----------|--------|--------|--------|----------|----------|-----------------------------------------------------------------------------------------------------------------------------------------------------------------------------------------------------------------------------------------------------------------------------------------------------------------------------------------------------------------------------------------------------------------------------------------------------------------------------------------------------------------------------------------------------------------------------------------|
| NR3C1 | 0,306  | ligand-dependent nuclear receptor |           | -1,159 | -0,982 | 0,046  | 3,18E-12 | 6,92E-10 | ABCA1,APOE,CASP6,CAVIN2,CCL4,CDKN1A,CDKN1C,CEBPB,CKAP2,CXCL2,DBT,DUSP1,EDN1,EGR1,F3,FNTA,FOS,GADD45A,GADD45B,GEM,IER2,IER3,IFIH1,JADE1,JUN,JUND,KLF9,MAEA,MCL1,NFKBIA,NME5,NR0B2,NR3C1,PER1,PIK3R3,PPP1R15A,PRKACB,RGS2,RHOB,RRAGC,SERPINE1,SGK1,THAP1,TIMP3,TIPARP,TNFAIP3,TNFAIP8,TNFRSF11B,TSC22D3,WDR12,WDR37                                                                                                                                                                                                                                                                       |
| IGF1  | -0,252 | growth factor                     | Inhibited | -5,145 | -3,935 | 0,199  | 7,84E-12 | 1,56E-09 | ABCA1,BTG2,CAVIN2,CCL4,CCN2,CCNA2,CCNG2,CDKN1A,CDKN1B,CEBPB,CEBPD,CISH,CITED2,DUSP1,DUSP6,EDN1,EGR1,F3,FOS,FO SB,GADD45A,HBB,IER2,IER3,IL4R,JUN,JUNB,KLF6,MCL1,MGA,NFKBI A,NR3C1,NR4A1,PIM1,PTGER4,SERPINE1,SGK1,SLC20A1,TNFRSF11B,UBE2B,ZFP36                                                                                                                                                                                                                                                                                                                                          |
| TNF   | -0,149 | cytokine                          | Inhibited | -5,876 | -4,614 | 0,144  | 1,16E-11 | 2,23E-09 | ABCA1,AK2,ANK3,APOE,ARHGEF17,ATF3,BDKRB2,BTG2,BTG3,CAS P6,CCL4,CCN2,CDKN1A,CEBPB,CEBPD,CHI3L1,CISH,CITED2,COL4 A3,CPT2,CRISPLD2,CXCL2,DBT,DUSP1,DUSP2,DUSP5,DUSP6,EDN 1,EGR1,EGR3,EPHA2,ETS2,F3,FOS,FOSB,FOSL2,GADD45A,GADD45 B,GDF15,GEM,GLS,GNAI3,HBEGF,HES1,IER2,IER3,IFIH1,IL4R,ITPR2, JUN,JUNB,JUND,KLF4,KLF6,KMO,LDLR,MAEA,MAFF,MCL1,MTTP,NE DD9,NFKBIA,NR0B2,NR3C1,NR4A1,NR4A3,PIM1,PLA1A,PLK3,PPP1R 15A,PPP1R3C,RGS16,RGS2,RGS3,RHOB,RND3,SERPINE1,SERPINE 2,SGK1,SLC20A1,SOCS2,SPSB1,SYNPO,TIMP3,TLR3,TNFAIP3,TNFA IP8,TNFRSF11B,TNFSF8,TSC22D3,UBR2,VAV3,ZBTB11,ZFP36,ZNF3 3n |
| LDL   |        | complex                           |           | -2,274 | -1,314 | 0,228  | 1,64E-11 | 2,98E-09 | ABCA1,ABCG1,APOE,ATF3,CASP6,CCL4,CCN2,CDKN1A,CXCL2,DUS P1,DUSP2,EGR1,EGR3,F3,FOS,FOSB,GAS6,GPR183,ITPR2,JUN,LDL R,MCL1,NR0B2,NR4A1,NR4A3,RND3,SERPINE1,SREBF2,TNFAIP3                                                                                                                                                                                                                                                                                                                                                                                                                   |
| MAPK1 | 0,125  | kinase                            | Inhibited | -3,139 | -3,110 | 0,005  | 2,15E-11 | 3,38E-09 | APOE,ATF3,CCL4,CCN2,CDKN1A,CDKN1B,CISH,CPED1,DAB2,DUS P1,DUSP2,EGR1,FOS,FOSB,FOSL2,GLS,HBB,IFIH1,ITPR2,JUN,JUNB, JUND,MCL1,NR4A1,PROS1,RGS16,RGS2,SOCS2,SPRY2,SPRY4,SPS B1,SUOX,TLR3,TRIM14                                                                                                                                                                                                                                                                                                                                                                                             |
| MAPK9 |        | kinase                            |           | -0,898 | -0,144 | 0,177  | 2,20E-11 | 3,38E-09 | CCN2,CDKN1A,CDKN1B,CEBPB,EDN1,EGR1,FOS,FOSL2,GADD45A, GADD45B,IER2,JUN,JUNB,JUND,KLF6,LSM5,PLA1A,PPP1R15A,RAD 23B,TLR3,TNFAIP3,TNFSF8,ZFP36                                                                                                                                                                                                                                                                                                                                                                                                                                             |
| Mek   |        | group                             | Inhibited | -3,744 | -3,135 | 0,143  | 2,26E-11 | 3,38E-09 | APOE,CCN2,CDKN1A,CDKN1B,DUSP5,DUSP6,EGR1,EGR3,EPHA2,E RBB3,FOS,GDF15,IER2,IER3,JUN,JUNB,MAFF,MCL1,NES,NR4A1,RN D3,SERPINE1,SLC20A1,SPRY2,SPRY4,TFB2M,TNFAIP3                                                                                                                                                                                                                                                                                                                                                                                                                            |
| NRG1  |        | growth factor                     |           | -2,231 | -1,718 | 0,174  | 2,26E-11 | 3,38E-09 | ABCA1,ATF1,BET1,CCN2,CDKN1A,CDKN1B,DUSP1,DUSP6,EDN1,E GR1,EGR3,EPHA2,ERBB3,FOS,FOSB,HES1,IER2,IER3,JUN,JUNB,JU ND,LPCAT3,MCL1,NR4A1,NR4A3,ZFP36,ZNF33B                                                                                                                                                                                                                                                                                                                                                                                                                                  |
| ESR1  | -0,038 | ligand-dependent nuclear receptor | Activated | 2,302  | 2,759  | 0,060  | 2,52E-11 | 3,65E-09 | ADD3,ANK3,APOE,ATF3,CALML4,CASP6,CCL4,CCNA2,CCNC,CCNG 2,CDKN1A,CDKN1B,CDKN1C,CEBPB,CEBPD,DAB2,DUSP5,EDN1,EG R1,ERBB3,ERGIC2,F3,FGFR1OP,FMR1,FOS,FOSB,FOSL2,GADD45B, GDF15,GEM,GGA2,HBEGF,IER3,JUN,JUNB,JUND,LDLR,MAP3K4,MA P7,MYO6,NEDD4,NEDD9,NFKBIA,NLGN1,NR0B2,PDK4,PLCE1,PPP1 R3C,PRKACB,PROS1,RBM22,RGS16,RGS3,RIT1,RND3,SERPINE1,S GK1,SMC4,SNAP23,SOCS2,SPRY4,SSX2IP,STEAP1,STX3,SULT1C2, SYNPO,TACC1,TNFAIP3,TNFRSF11B,TRIB1,TSC22D3,TSPYL2,USP8, VAV3,ZNF544                                                                                                                   |
| FSH   |        | complex                           | Inhibited | -2,747 | -2,282 | 0,127  | 4,69E-11 | 6,24E-09 | ACP2,BTG2,CCN2,CDKN1C,DAB2,DUSP1,ELL2,FILIP1L,FOS,FOSB,F OSL2,GATA6,GEM,GPRC5A,IL6R,JUN,JUNB,KIDINS220,LDLR,MCL1, NR4A1,PLA1A,POP5,PSMD1,PTP4A1,RGS16,RHOB,SERPINE1,SGK1 ,SNAP23,TNFAIP3,TNFRSF11B,TRIB1,TYRO3,UBE2L3,ZNF331                                                                                                                                                                                                                                                                                                                                                            |
| FAS   | 0,053  | transmembrane receptor            |           | 0,908  | 0,815  | -0,026 | 1,03E-10 | 1,27E-08 | AIFM1,AKAP9,BTG3,CCL4,CCN2,CDKN1A,CDKN1B,CEBPD,CXCL2,E GR1,F3,FOS,FOSB,IER3,JUN,JUND,LDLR,NFKBIA,NR3C1,NR4A1,PL CL2,PPFIBP2,PPP1R15A,PTGER4,PTP4A1,RASA1,RGS3,SERPINE1, STAMBP,STK38,TNFAIP3,TNFRSF11B,TRIB1,ZFP36                                                                                                                                                                                                                                                                                                                                                                      |
| Ca2+  |        | chemical - endogenous mammalian   | Inhibited | -4,021 | -3,013 | 0,226  | 1,73E-10 | 1,92E-08 | ATF3,CDKN1A,CDKN1B,CEBPB,CEBPD,CHGB,CSR1P1,DUSP1,EDN1, EGR1,FOS,FOSL2,GLS,HBEGF,IL6R,ITPR2,JUN,JUNB,JUND,KLF4,KL K7,NFKBIA,NR4A1,NR4A3,PER1,SERPINE1,SGK1,SREBF2                                                                                                                                                                                                                                                                                                                                                                                                                        |
| TREM1 | -0,136 | transmembrane receptor            | Inhibited | -5,550 | -4,491 | 0,216  | 1,82E-10 | 1,97E-08 | ATF3,CEBPB,CXCL2,EDN1,EGR1,EGR3,ETS2,F3,FABP3,FERMT2,GA DD45B,GEM,GPRC5A,HBEGF,HES1,IL6R,MAFF,NFKBIA,RGS16,RHO BTB3,RIN2,SLCO4A1,SPRY2,YRDC                                                                                                                                                                                                                                                                                                                                                                                                                                             |
| MAPK8 | -0,093 | kinase                            |           | -1,649 | -0,940 | 0,161  | 3,30E-10 | 3,43E-08 | ABCA1,APOE,ATG5,B4GALT5,CCN2,CCNA2,CDKN1A,CDKN1B,CEBP B,DUSP1,DUSP6,EGR1,FOS,FOSL2,GADD45A,JUN,JUND,KLF6,MTT P,TNFAIP3,TSC22D3,ZFP36                                                                                                                                                                                                                                                                                                                                                                                                                                                    |
| CREB1 |        | transcription regulator           | Inhibited | -5,654 | -4,841 | 0,143  | 4,51E-10 | 4,47E-08 | ABCA1,APOE,APOLD1,ATF1,ATF3,BTG2,CCL4,CCNA2,CDKN1A,CEB PB,CEBPD,CHGB,CXCL2,DUSP1,EDN1,EGR1,FOS,FOSB,GADD45A, GADD45B,GEM,GLS,IER2,IER3,IMPACT,JUN,JUNB,KLF4,LDLR,MCL1, NAB2,NR4A1,NR4A3,PER1,PPP1R15A,RGS2,SERPINI1,SGK1,SHTN1 ,SOCS2,TIPARP,ZFP36                                                                                                                                                                                                                                                                                                                                      |
| FADD  | 0,110  | other                             | Activated | 1,854  | 2,689  | 0,210  | 6,00E-10 | 5,74E-08 | CDKN1A,CDKN1B,CXCL2,EGR1,FOS,GADD45B,IFIH1,JUN,JUNB,KLF 6,NAT1,PIM1,PPP1R15A,TIPARP,TLR3,TNFAIP3                                                                                                                                                                                                                                                                                                                                                                                                                                                                                        |

|                  |        |                                   |           |        |        |        |          |          |                                                                                                                                                                                                                                                                                                                                    |
|------------------|--------|-----------------------------------|-----------|--------|--------|--------|----------|----------|------------------------------------------------------------------------------------------------------------------------------------------------------------------------------------------------------------------------------------------------------------------------------------------------------------------------------------|
| CREM             |        | transcription regulator           | Inhibited | -2,652 | -2,337 | 0,083  | 1,79E-09 | 1,55E-07 | ABCA1,APOE,APOLD1,ATF3,BTG2,CEBPB,DUSP1,EGR1,FOS,GADD45B,JUNB,LDLR,MCL1,NAB2,NR4A1,PER1,PPP1R15A,RHOB,SMC4,TIPARP                                                                                                                                                                                                                  |
| INS              | -0,069 | other                             | Inhibited | -2,922 | -2,699 | 0,061  | 2,00E-09 | 1,65E-07 | CCN2,CDKN1A,CEBPB,CITED2,CUL5,DUSP1,EDN1,EGR1,ERBB3,F3,FOS,FOSB,FOSL2,IER2,IER3,JUN,JUNB,JUND,NR4A1,SREBF2                                                                                                                                                                                                                         |
| IL1B             | -0,244 | cytokine                          | Inhibited | -6,679 | -5,565 | 0,161  | 2,00E-09 | 1,65E-07 | AIF1,APOE,ATF3,BTG2,CCL4,CCN2,CDKN1A,CEBPB,CEBPD,CHI3L1,CISH,CXCL2,DAB2,DUSP1,DUSP5,EDN1,EGR1,ETS2,F3,FMR1,FOS,FOSB,GADD45A,GADD45B,GAS6,GDF15,GEM,HBEGF,HES1,IER2,IER3,IL6R,JUN,JUNB,JUND,LDLR,MCL1,NFKBIA,NR0B2,NR4A1,NR4A3,PI M1,PLK3,PTGDS,PTP4A1,RGS16,RHOB,SERPINE1,SLC20A1,SOCS2,TIMP3,TLR3,TNFAIP3,TNFRSF11B,TSC22D3,ZFP36 |
| SRF              |        | transcription regulator           |           | -0,910 | -0,400 | 0,152  | 4,05E-09 | 3,08E-07 | APOLD1,CCN2,CDKN1A,CEBPD,CNN2,CSR1,DUSP5,EGR1,EGR3,FERMT2,FILIP1L,FOS,FOSB,GADD45A,IER2,JUN,JUNB,KRIT1,LDLR,LPCAT3,MCL1,MYL9,NR4A1,PDCD10,RFC4,RND3,SNX2,SREBF2,TME M184C,TNNT2                                                                                                                                                    |
| GH1              |        | growth factor                     | Inhibited | -3,345 | -3,058 | 0,074  | 4,61E-09 | 3,39E-07 | ACVR1,ATF3,CEBPB,CEBPD,CISH,EGR1,ERBB3,FOS,GADD45A,GF2H1,IL4R,JUN,JUNB,LDLR,RAD23B,SOCS2,ZFP36                                                                                                                                                                                                                                     |
| EGFR             |        | kinase                            | Inhibited | -3,573 | -2,600 | 0,186  | 1,38E-08 | 9,58E-07 | CCN2,CCNA2,CCNG2,CDKN1A,CDKN1B,CEBPB,CHI3L1,DUSP1,EGR1,EGR3,EPHA2,ERBB3,F3,FOS,FOSL2,GADD45A,HBEGF,IER2,IER3,JUN,JUNB,JUND,MCL1,NFKBIA,NSF,PRORP,PTGER4,RHOB,SERPINE1,SERPINE2,SPRY2,TNFRSF11B                                                                                                                                     |
| Pka              |        | complex                           | Inhibited | -3,284 | -2,519 | 0,204  | 1,71E-08 | 1,13E-06 | APOE,CCN2,CDKN1A,CDKN1B,CEBPB,DUSP1,EDN1,EGR1,FOS,JUN,JUNB,KLF6,LDLR,NR4A1,NR4A3,RGS2,SGK1,TNFRSF11B                                                                                                                                                                                                                               |
| ADRB             |        | group                             |           | 1,129  | 0,558  | -0,137 | 1,71E-08 | 1,13E-06 | ATF3,CASP6,CAVIN2,CCNA2,CDKN1A,CDKN1B,CXCL2,E2F4,FOS,GADD45A,GDF15,JUN,JUNB,KLF4,NFKBIA,NR4A1,NR4A3,SLCO4A1                                                                                                                                                                                                                        |
| IgG              |        | complex                           |           | 2,579  | 1,721  | -0,191 | 3,01E-08 | 1,84E-06 | APOE,CCL4,CDKN1A,CEBPB,CEBPD,DUSP1,EDN1,ETS2,FOSB,GPRC5A,IER2,JUND,KLK7,LDLR,PIM1,PPP1R15A,RND3,SERPINE1,TACSD2,TNFAIP3,ZFP36                                                                                                                                                                                                      |
| Creb             |        | group                             | Inhibited | -3,601 | -2,854 | 0,214  | 3,56E-08 | 2,16E-06 | ANK3,ATF3,CDKN1A,CEBPB,CEBPD,CSR1,DUSP1,EGR1,EGR3,FOS,FOSB,HES1,IER3,JUN,JUNB,LDLR,MCL1,NEDD9,NR3C1,NR4A1,NR4A3,PER1,RGS2,SYNPO,THAP1,TMEM184C,TNFRSF11B                                                                                                                                                                           |
| Akt              |        | group                             |           | -0,934 | -0,297 | 0,138  | 6,51E-08 | 3,54E-06 | AMOT,B4GALT5,BTG2,CCN2,CDKN1A,CDKN1B,CDKN1C,CEBPB,E2F4,ERBB3,F3,FOS,HES1,IER3,JUN,MCL1,NES,NFKBIA,NR0B2,PKD4,PTGER4,RHOB,SERPINE1,SGK1,TIPARP                                                                                                                                                                                      |
| EPO              |        | cytokine                          | Inhibited | -3,724 | -2,835 | 0,217  | 8,53E-08 | 4,43E-06 | CCNG2,CDKN1A,CDKN1B,CISH,EDN1,EGR1,FOS,FOSB,GDF15,HBB,JUN,JUNB,LDLR,MCL1,NAB2,NFKBIA,NR3C1,PIM1,PLCL2,PRDM14,RNF128,SNAP23,SOCS2,TNFRSF11B,TSC22D3                                                                                                                                                                                 |
| IL4              |        | cytokine                          |           | -2,932 | -1,539 | 0,221  | 9,97E-08 | 5,02E-06 | ABCA1,ACP2,AK2,APOE,APOLD1,CAND1,CASP6,CCL4,CCN2,CD58,CDKN1A,CDKN1B,CISH,CITED2,CXCL2,DDAH1,F3,FGFR1OP,FOS,FOSB,FYCO1,HBEGF,IER2,IER3,IFIH1,IL4R,JUN,JUNB,JUND,KLF6,KLK7,KMO,LIPG,MCL1,NAB2,NEDD9,NFKBIA,NR3C1,NR4A3,PIM1,PMS1,PREPL,PROS1,SERPINE1,SOCS2,TFEC,TIMP3,TNFRSF11B,TNFSF8,TYRO3,XPOT,ZFP36,ZZZ3                        |
| ESR2             |        | ligand-dependent nuclear receptor |           | -0,765 | -0,521 | 0,067  | 1,07E-07 | 5,32E-06 | ABCA1,APOE,ATF3,CCN2,CCNA2,CDKN1A,CDKN1B,CDKN1C,CEBPD,CXCL2,DAB2,DDAH1,EDN1,EGR1,EGR3,FMR1,FOS,GADD45B,GGCT,JUNB,KLF4,NEDD9,NFKBIA,PKD4,PPP1R3C,PTGDS,SERPINE1,SGK1,SOCS2,SYNPO,TNFRSF11B,TRIB1,USP8,VAV3                                                                                                                          |
| Pkc(s)           |        | group                             | Inhibited | -3,269 | -2,251 | 0,239  | 1,57E-07 | 7,58E-06 | ABCA1,ATF3,CCN2,CDKN1A,CDKN1B,DUSP1,EDN1,EGR1,F3,FOS,GADD45A,GADD45B,JUN,JUNB,KLF6,NR4A1,NR4A3,PER1,PPP1R15A,RGS2,SERPINE1                                                                                                                                                                                                         |
| IL6              | -0,373 | cytokine                          | Inhibited | -4,406 | -3,040 | 0,221  | 1,88E-07 | 9,01E-06 | ABCA1,ACVR1,APOE,ATF3,BTG2,CCL4,CCN2,CCNA2,CDKN1A,CDKN1B,CEBPB,CEBPD,CISH,CTR9,CXCL2,DUSP1,DUSP6,E2F4,EGR1,ERBIN,ETS2,F3,FOS,GADD45A,GADD45B,IL4R,IL6R,JUN,JUNB,JUND,LDLR,MCL1,MTTP,NFKBIA,NR3C1,PIM1,PPP1R15A,PTGER4,RASA1,SERPINE1,SGK1,SOCS2,TLR3,TNFRSF11B,UBR2                                                                |
| NFKBIA           | -0,921 | transcription regulator           | Inhibited | -3,304 | -2,692 | 0,117  | 2,59E-07 | 1,17E-05 | AK2,BTG2,CCNA2,CCNC,CDKN1A,CEBPB,CEBPD,CHI3L1,CXCL2,DUSP6,F3,FOS,GADD45A,GADD45B,HES1,IER3,JUN,JUNB,NBR1,NFKBIA,NR4A1,PIM1,RGS16,RGS3,SERPINE2,SGK1,TIMP3,TNFAIP3,TNFAIP8,TNFRSF11B,ZNF638                                                                                                                                         |
| OSM              |        | cytokine                          |           | -2,594 | -1,643 | 0,164  | 2,80E-07 | 1,25E-05 | ABCA1,ABCG1,ATF3,BAIAP2,CCNG2,CDKN1A,CDKN1B,CEBPD,CHI3L1,CISH,CXCL2,EGR1,ERBB3,ETS2,F3,FOS,FOSB,GNS,HBEGF,IER3,IL4R,IL6R,JUN,JUNB,KLK7,LDLR,LPCAT3,NEDD4,PTP4A1,SERPINE1,TDP2,TIMP3,TLR3,TNFRSF11B,TYRO3,ZFP36,ZNF330                                                                                                              |
| prostaglandin E2 |        | chemical - endogenous mammalian   |           | -2,563 | -1,913 | 0,151  | 3,88E-07 | 1,66E-05 | ABCG1,ATF3,CASP6,CCL4,CCN2,CDKN1A,CEBPB,CEBPD,DUSP1,EGR1,FOS,FOSB,FOSL2,IER3,JUN,KLF4,MCL1,NEDD9,NFKBIA,NR4A1,PTGER4,RGS2,SOCS2,TNFRSF11B,TSC22D3                                                                                                                                                                                  |
| nitric oxide     |        | chemical - endogenous mammalian   |           | -2,168 | -1,652 | 0,153  | 5,64E-07 | 2,23E-05 | ATF3,CCN2,CDKN1A,CDKN1B,DUSP1,DUSP6,EDN1,EGR1,FOS,GADD45A,IER3,JUN,JUNB,NR3C1,RAD23B,SGK1,TIMP3                                                                                                                                                                                                                                    |
| NGFR             |        | transmembrane receptor            |           | -0,173 | 0,219  | 0,163  | 6,81E-07 | 2,65E-05 | CCNA2,CDKN1B,FOS,JUN,LDLR,NR0B2,RHOB,SERPINE1                                                                                                                                                                                                                                                                                      |

|                                           |                                       |                                                                           |                  |                  |                |                      |                      |                                                                                                                                                                                                                                                                                                                                                                                                                            |                                                                                                                                                                       |
|-------------------------------------------|---------------------------------------|---------------------------------------------------------------------------|------------------|------------------|----------------|----------------------|----------------------|----------------------------------------------------------------------------------------------------------------------------------------------------------------------------------------------------------------------------------------------------------------------------------------------------------------------------------------------------------------------------------------------------------------------------|-----------------------------------------------------------------------------------------------------------------------------------------------------------------------|
| ACVR1C<br>Pdgf<br>(complex)<br>Insulin    | kinase<br>complex                     | Inhibited                                                                 | -1,767<br>-3,778 | -1,195<br>-2,953 | 0,218<br>0,237 | 7,15E-07<br>1,10E-06 | 2,74E-05<br>4,09E-05 | CCNG2,CDKN1A,CDKN1B,FOS,JUNB,KLF4,SERPINE1<br>CDKN1A,CDKN1B,EDN1,EGR1,F3,FOS,FOSB,JUN,JUNB,LDLR,PIK3R3,SERPINE1,TIMP3                                                                                                                                                                                                                                                                                                      |                                                                                                                                                                       |
| oleic acid                                | chemical -<br>endogenous<br>mammalian |                                                                           | -1,267           | -0,880           | 0,109          | 1,35E-06             | 4,73E-05             | ABCA1,APOE,DUSP1,EDN1,FOS,GADD45A,GADD45B,GDF15,LDLR,MTTP,NFKBIA,NR4A1,PKK4,SERPINE1                                                                                                                                                                                                                                                                                                                                       |                                                                                                                                                                       |
| ZMPSTE2<br>4                              | peptidase                             | Activated                                                                 | 3,065            | 2,451            | -0,208         | 1,40E-06             | 4,89E-05             | ATF3,BTG2,CDKN1A,CISH,CXCL2,GADD45A,GADD45B,RGS16,SOCS2                                                                                                                                                                                                                                                                                                                                                                    |                                                                                                                                                                       |
| HRAS                                      | 0,032                                 | enzyme                                                                    | -0,799           | -0,261           | 0,126          | 1,42E-06             | 4,94E-05             | BTG2,CCN2,CCNA2,CDK7,CDKN1A,CDKN1B,CEBPB,CEBPD,CISH,CNN2,COPB2,CSR1,DUSP1,DUSP6,EGR1,FABP3,FERMT2,FOS,FOSB,FOSL2,GAS6,HES1,JUN,JUNB,KLF6,LIPG,MYL9,MYO1C,NFKBIA,RB1CC1,RHOB,SERPINE1,SERPINE2,SOCS2,SPRY2,SPRY4,TIMP3,TYRO3                                                                                                                                                                                                |                                                                                                                                                                       |
| Growth<br>hormone<br>hydrogen<br>peroxide | group                                 | Inhibited                                                                 | -2,803           | -2,097           | 0,172          | 1,46E-06             | 5,02E-05             | APOE,CEBPB,CEBPD,CISH,CITED2,EGR1,FOS,FOSL2,GDF15,HBB,IER3,JUN,JUNB,LDLR,NEDD9,NFKBIA,PKK4,PPP1R15A,SGK1,SOCS2                                                                                                                                                                                                                                                                                                             |                                                                                                                                                                       |
| MYC                                       | -0,718                                | chemical -<br>endogenous<br>mammalian<br>transcription<br>regulator       | -6,022           | -4,804           | 0,228          | 1,99E-06             | 6,39E-05             | ATF3,BTG2,CCL4,CCN2,CCNA2,CDKN1A,CDKN1B,DUSP1,DUSP2,E2F4,EDN1,EGR1,EPHA2,ETS2,FOS,GADD45A,GADD45B,GDF15,HBEGF,JUN,KLF4,LDLR,NR4A1,PDCD10,PIM1,PTGER4,RIOK3,SERPINE1,SGK1,SLC20A1,SREBF2,TNFAIP3                                                                                                                                                                                                                            |                                                                                                                                                                       |
| RASSF1                                    | other                                 |                                                                           | 0,196            | 1,110            | 0,147          | 2,29E-06             | 7,20E-05             | ABCA1,ACVR1,AK2,ANKRD17,CCNA2,CCNG2,CDK7,CDKN1A,CDKN1B,CEBPD,CPT2,CSE1L,DROSHA,DUSP1,DUSP2,DUSP5,DUSP6,EDN1,EGR1,EIF2B1,EPHA2,F3,FOS,GADD45A,GADD45B,GATA6,GDI1,GLS,HES1,IER3,IFIH1,IMPACT,JUN,KLF4,KLF6,MCL1,MFAP1,MYL9,MYO1C,NARS1,NFKBIA,PFAS,PLA1A,PPID,PRKACB,RAB40B,RARS1,RHOB,SEPHS2,SERPINE1,SERPINE2,SGK1,TRIP12,YRDC,ZFP36                                                                                       |                                                                                                                                                                       |
| tretinoin                                 | chemical -<br>endogenous<br>mammalian |                                                                           | -1,698           | -1,465           | 0,068          | 2,72E-06             | 8,35E-05             | APOE,CCNA2,CDKN1A,DAB2,EGR1,FOS,GDF15,HBEGF,KLF4,MTUS1,MYL9,PROS1                                                                                                                                                                                                                                                                                                                                                          |                                                                                                                                                                       |
| TP63                                      | transcription<br>regulator            |                                                                           | -2,503           | -1,469           | 0,139          | 3,29E-06             | 9,82E-05             | ABCA1,ABCG1,ADD3,APOE,ATR,BTG2,CAPN7,CASP6,CCL4,CCN2,CCNA2,CCNC,CDKN1A,CDKN1B,CEBPB,CHGB,CITED2,COL4A3,CSE1L,CXCL2,DAB2,DUSP1,E2F4,EDN1,EGR1,F3,FOS,FOSL2,GATA6,GDF15,GPRC5A,HBEGF,HES1,IER3,IFIH1,IL6R,ITPR2,JUN,KLF4,KLF9,KRBOX4,MAP7,MCL1,MSH3,MYO1C,NES,NR0B2,NR3C1,PIK3C2A,PIM1,PLCE1,PLK3,PTGDS,RAD23B,RCBTB2,RFC4,RPA1,SERPINE1,SERPINE2,SKAP2,SYNPO,TERF1,THSD4,TLR3,TNFAIP3,TNFRSF11B,TSC22D3,UBXN8,ZFAND5,ZNF146 |                                                                                                                                                                       |
| PPARG                                     | 0,174                                 | ligand-<br>dependent<br>nuclear<br>receptor<br>transcription<br>regulator | -2,108           | -1,358           | 0,176          | 3,30E-06             | 9,82E-05             | ATG5,CCNA2,CDKN1A,CDKN1B,CDKN1C,CITED2,COL4A3,CPT2,DUSP6,EI24,EPHA2,F3,FOS,GADD45A,HBEGF,HES1,IER3,JUNB,KHK,KLF6,MAFF,PIK3R3,RBBP8,RPA1,SERPINE1,TIMP3,TNFAIP8                                                                                                                                                                                                                                                             |                                                                                                                                                                       |
| DACH1                                     | -0,073                                | transcription<br>regulator                                                | 0,476            | 1,054            | 0,121          | 5,08E-06             | 1,45E-04             | ABCA1,ABCG1,APOE,CAVIN2,CCN2,CDKN1A,CEBPB,CPT2,CXCL2,EDN1,FABP3,GDF15,HES1,JUN,KLF4,KLF6,LDLR,MTTP,NR4A1,NSF,PCCTP,PKK4,PHKB,RAB20,RHOB,SAP18,SERPINE1,SGK1,TSC22D3,VAMP2                                                                                                                                                                                                                                                  |                                                                                                                                                                       |
| Lh                                        | complex                               | Inhibited                                                                 | 3,321            | 2,789            | -0,191         | 5,45E-06             | 1,54E-04             | CDKN1A,EGR1,FOS,IER2,JUN,KLF4,SERPINE1,TNFAIP3                                                                                                                                                                                                                                                                                                                                                                             |                                                                                                                                                                       |
| FOXO1                                     | -0,079                                | transcription<br>regulator                                                | -2,713           | -2,433           | 0,115          | 5,55E-06             | 1,54E-04             | ACP2,CDKN1C,DAB2,DUSP1,FOS,GEM,KIDINS220,MCL1,PER1,POP5,PSMD1,PTP4A1,RGS16,RHOB,SGK1,SNAP23,TNFAIP3,TNFRSF11B,TRIB1,TYRO3                                                                                                                                                                                                                                                                                                  |                                                                                                                                                                       |
| ethanol                                   | chemical -<br>endogenous<br>mammalian |                                                                           | -2,658           | -1,729           | 0,186          | 5,63E-06             | 1,56E-04             | ATG14,CASP6,CCL4,CCN2,CCNA2,CCNG2,CDKN1A,CDKN1B,CDKN1C,CITED2,CPT2,EDN1,EGR1,FOS,FOSB,GADD45A,GADD45B,IER3,JUN,JUNB,KLF4,MTTP,PKK4,PPP1R15A,SERPINE1,SGK1,SPRY2,SREBF2                                                                                                                                                                                                                                                     |                                                                                                                                                                       |
| norepinephrine                            | chemical -<br>endogenous<br>mammalian | Inhibited                                                                 | -1,704           | -1,163           | 0,117          | 5,71E-06             | 1,57E-04             | ABCA1,ABCG1,ATF3,CCN2,CDKN1A,CDKN1B,CEBPB,CEBPD,DUSP1,DUSP6,EDN1,EGR1,FOS,FOSB,FOSL2,GADD45A,JUN,KLF6,NR3C1,PLK3,PPP1R3C,RHOB,SERPINE1,SGK1,TSC22D3,VAMP2                                                                                                                                                                                                                                                                  |                                                                                                                                                                       |
| JUN                                       | -1,288                                | transcription<br>regulator                                                | -4,079           | -3,182           | 0,231          | 5,95E-06             | 1,61E-04             | ABCA1,CCN2,CEBPB,DUSP1,EDN1,EGR1,FOS,FOSL2,GDF15,GEM,NFKBIA,NR4A1,NR4A3,PER1,SERPINE1,SGK1                                                                                                                                                                                                                                                                                                                                 |                                                                                                                                                                       |
| NELFB                                     | 0,039                                 | other                                                                     | Activated        | 2,391            | 2,236          | -0,069               | 6,52E-06             | 1,74E-04                                                                                                                                                                                                                                                                                                                                                                                                                   | APOE,ATF3,CCN2,CCNA2,CDKN1A,CDKN1B,DROSHA,DUSP1,DUSP5,DUSP6,EDN1,F3,FOS,GADD45A,GAS6,HES1,JUN,JUNB,NFKBIA,NR0B2,NR4A1,PTGDS,RASA1,RHOB,SERPINE1,SGK1,TIMP3,VAV3,ZFP36 |
|                                           |                                       |                                                                           |                  |                  |                |                      |                      | ATF3,CCN2,CDKN1A,GADD45A,GADD45B                                                                                                                                                                                                                                                                                                                                                                                           |                                                                                                                                                                       |

|                       |        |                                   |           |        |        |        |          |          |                                                                                                                                                                                                                                          |
|-----------------------|--------|-----------------------------------|-----------|--------|--------|--------|----------|----------|------------------------------------------------------------------------------------------------------------------------------------------------------------------------------------------------------------------------------------------|
| SP3                   | 0,227  | transcription regulator           |           | -1,464 | -0,863 | 0,215  | 8,78E-06 | 2,27E-04 | ABCA1,ADD3,ATF3,CDKN1A,CDKN1B,CHI3L1,CITED2,DUSP1,EGR1,F3,FOS,GDF15,JUN,KLF4,LDLR,NES,SERPINE1,SGK1                                                                                                                                      |
| CSF3                  | -0,072 | cytokine                          | Inhibited | -3,012 | -2,557 | 0,116  | 9,26E-06 | 2,34E-04 | CDKN1B,CEBPB,CISH,CXCL2,DUSP6,EDN1,EGR1,EGR3,FOS,GADD45A,GADD45B,GPR183,JUN,MCL1,PIM1,TNFAIP3                                                                                                                                            |
| LIF                   | -0,303 | cytokine                          | Inhibited | -2,587 | -2,174 | 0,110  | 9,36E-06 | 2,35E-04 | CCNA2,CDKN1A,CEBPB,CEBPD,CISH,CXCL2,EGR1,FOS,GATA6,HBE EGF,HES1,JUN,JUNB,PIM1,PRDM14,SNAP23,SOCS2,TNFRSF11B                                                                                                                              |
| ERBB2                 |        | kinase                            |           | -1,079 | -0,050 | 0,212  | 9,37E-06 | 2,35E-04 | BTG2,CAVIN2,CCL4,CCN2,CCNA2,CDC23,CDKN1A,CDKN1B,CEBPB,CPT2,CSE1L,DUSP6,EDN1,EGR1,ELL2,ERBB3,FOS,GAS6,GLS,HBE GF,HES1,IL6R,ITPR2,JUN,JUNB,KLF4,MCL1,MYL9,NEDD9,PKD4,POL R3B,RETREG1,RFC4,RHOB,RPA1,SERPINE1,SERPINE1,SLC66A2,SO CS2,TIMP3 |
| glutamine             |        | chemical - endogenous mammalian   |           | 1,611  | 1,201  | -0,131 | 1,11E-05 | 2,66E-04 | ATG5,CEBPB,DUSP1,FOS,GADD45A,JUN,JUNB,KLF4,MCL1,NES,NF KBIA,NR4A1                                                                                                                                                                        |
| NFATC2                |        | transcription regulator           |           | -0,115 | 0,466  | 0,178  | 1,28E-05 | 2,99E-04 | ABCA1,CCNA2,CDKN1A,CISH,CITED2,CXCL2,DAB2,EDN1,EGR3,IER 3,JUN,NFKBIA,NR4A1,RGS2,SOCS2,TLR3,TNFSF8                                                                                                                                        |
| C5                    | 0,231  | cytokine                          | Inhibited | -3,238 | -2,510 | 0,206  | 1,39E-05 | 3,19E-04 | ATF3,CCL4,CXCL2,EGR1,F3,GDF15,NFKBIA,PLK3,PPP1R15A,RGS3, SERPINE1,TNFAIP3,ZFP36                                                                                                                                                          |
| HLX                   | 0,032  | transcription regulator           |           | 0,251  | -0,222 | -0,182 | 1,41E-05 | 3,23E-04 | CDKN1C,EGR1,GDF15,HES1,IL4R,JUN,SEMA3G                                                                                                                                                                                                   |
| STAT3                 | -0,113 | transcription regulator           | Inhibited | -4,608 | -3,656 | 0,202  | 1,65E-05 | 3,57E-04 | CCL4,CCN2,CCNC,CDKN1A,CDKN1B,CEBPB,CEBPD,CHI3L1,CXCL2, EDN1,EGR1,EGR3,F3,FERMT2,FLRT3,FOS,GADD45A,HBB,IFIH1,IL4R ,IL6R,JUNB,KLF4,MCL1,NES,PIM1,SERPINE1,SERPINE2,SGK1,SYNP O,TLR3,TRIM14,ZFP36                                           |
| thyroid hormone       |        | chemical - endogenous mammalian   |           | -0,762 | -0,785 | -0,007 | 1,73E-05 | 3,70E-04 | ABCG1,APOE,BTG2,CCNA2,CDKN1A,CDKN1B,CHGB,DDAH1,EGR1, FOS,GDI1,KLF9,PER1,PTGDS,SERPINE2,SREBF2                                                                                                                                            |
| Hdac                  |        | group                             |           | 2,027  | 1,923  | -0,029 | 2,02E-05 | 4,24E-04 | ATF3,CCNG2,CDKN1A,E2F4,EDN1,EGR1,EGR3,FOS,GADD45B,IL6R, JUN,KLF6,KLF9,NR4A1,SPRY2                                                                                                                                                        |
| FOXO4                 | -0,015 | transcription regulator           |           | -1,026 | -1,228 | -0,065 | 2,25E-05 | 4,60E-04 | CCN2,CCNG2,CDKN1A,CDKN1B,GADD45A,GADD45B,IER3,SERPINE 1,SGK1,SREBF2,ZFAND5                                                                                                                                                               |
| MAPK14                |        | kinase                            |           | -1,511 | -0,609 | 0,238  | 2,26E-05 | 4,60E-04 | ABCA1,CCNA2,CEBPD,DAB2,DUSP1,DUSP6,FOS,FOSL2,GADD45A,J UN,JUNB,JUND,LDLR,SGK1,SREBF2,ZFP36                                                                                                                                               |
| 24-hydroxycholesterol |        | chemical - endogenous mammalian   | Activated | 2,032  | 2,216  | 0,083  | 2,32E-05 | 4,70E-04 | ABCA1,ABCG1,APOE,LDLR,SREBF2                                                                                                                                                                                                             |
| ADIPOQ                | -0,044 | other                             |           | 0,716  | 0,832  | 0,031  | 2,33E-05 | 4,70E-04 | CASP6,CCN2,CDKN1A,CDKN1B,CXCL2,DUSP1,EGR1,F3,FABP3,FOS ,HBEGF,IL4R,LDLR,NFKBIA,TNFAIP3                                                                                                                                                   |
| butyric acid          |        | chemical - endogenous mammalian   |           | -1,430 | -1,268 | 0,040  | 2,56E-05 | 5,14E-04 | ACP2,CAPN7,CCNA2,CCNC,CDKN1A,CDKN1B,CDKN1C,CETN2,DPP 6,DUSP1,E2F4,FOS,GADD45A,GATA6,GDI1,GPRC5A,HBB,ITPR2,KLF 4,MCL1,MPP3,NFKBIA,NR4A1,PTGDS,SERPINE1,SGK1,TIMP3                                                                         |
| SCARB1                |        | transporter                       |           | -0,876 | -1,065 | -0,068 | 2,62E-05 | 5,18E-04 | ABCA1,ABCG1,APOE,CXCL2,F3,FABP3,LDLR,SREBF2                                                                                                                                                                                              |
| MAP3K8                | -0,098 | kinase                            |           | -2,028 | -1,824 | 0,060  | 2,67E-05 | 5,24E-04 | APOE,CCL4,CDKN1B,CEBPD,CXCL2,DUSP6,FOS,IER3,JUN,JUNB,PT GER4,RGS3,SLCO4A1,UBE2B                                                                                                                                                          |
| MAP2K1/2              |        | group                             | Inhibited | -3,661 | -2,947 | 0,242  | 2,97E-05 | 5,73E-04 | ATF3,CCL4,CCN2,CDKN1B,CHI3L1,DUSP1,EGR1,FOS,JUN,MCL1                                                                                                                                                                                     |
| XDH                   | -0,168 | enzyme                            |           | -0,357 | -0,478 | -0,046 | 3,12E-05 | 6,00E-04 | ABCA1,ABCG1,CCN2,CEBPB,DUSP1,F3,SERPINE1                                                                                                                                                                                                 |
| FOXL2                 |        | transcription regulator           | Inhibited | -3,680 | -2,990 | 0,231  | 3,25E-05 | 6,19E-04 | ATF3,CXCL2,FOS,IER3,MAFF,NR4A3,PPP1R15A,RGS2,TNFAIP3                                                                                                                                                                                     |
| MACROH2A1             | 0,041  | other                             |           | 0,655  | 0,333  | -0,107 | 3,25E-05 | 6,19E-04 | ABCA1,CDKN1A,CDKN1C,CITED2,EDN1,EGR1,GADD45A,SERPINE1, SOCS2                                                                                                                                                                             |
| THR3                  | -0,119 | ligand-dependent nuclear receptor |           | -1,186 | -0,971 | 0,065  | 3,44E-05 | 6,45E-04 | ANGPTL3,BTG2,CDKN1B,CXCL2,ERBB3,FOS,GDI1,JUN,KLF9,LDLR, NR4A1,PKD4,PER1,PTGDS,SERPINE1,SREBF2,ZNF185                                                                                                                                     |
| VHL                   |        | transcription regulator           |           | 0,286  | -0,075 | -0,151 | 3,45E-05 | 6,45E-04 | AIF1,CCN2,CDKN1A,CDKN1B,CDKN1C,CPT2,DAB2,F3,FILIP1L,GLCE, IER3,JADE1,NEDD9                                                                                                                                                               |
| ZBTB17                |        | transcription regulator           |           | -1,286 | -1,912 | -0,238 | 3,69E-05 | 6,79E-04 | BTG3,CCNA2,CDKN1A,CDKN1C,CKAP2,EGR1,IER3,JUN,LDLR,ZFP36                                                                                                                                                                                  |

|                          |        |                                   |           |        |        |        |          |          |                                                                                                                                                               |
|--------------------------|--------|-----------------------------------|-----------|--------|--------|--------|----------|----------|---------------------------------------------------------------------------------------------------------------------------------------------------------------|
| TP73                     | -0,059 | transcription regulator           |           | -1,603 | -1,011 | 0,121  | 3,71E-05 | 6,81E-04 | ATF3,ATG5,BDKRB2,BTG2,CCNA2,CCNG2,CDKN1A,CDKN1B,CDKN1C,CXCL2,DRAM1,EDN1,EGR1,EPHA2,GADD45A,GPR137B,HBEGF,HES1,IER3,IL4R,PIK3R3,RB1CC1,SERPINE1,SERPINE2,TIMP3 |
| 22(R)-hydroxycholesterol |        | chemical - endogenous mammalian   | Activated | 1,578  | 2,054  | 0,185  | 3,74E-05 | 6,81E-04 | ABCA1,ABCG1,ANGPTL3,APOE,LDLR,LIPG,NR0B2                                                                                                                      |
| cholecalciferol          |        | chemical - endogenous mammalian   |           | -2,754 | -1,977 | 0,228  | 4,01E-05 | 7,18E-04 | CDKN1B,CEBPB,CEBPD,CSTF2T,EDN1,FOS,JUN,MYO6,NR0B2,SERPINE1,SLC20A1,TNFRSF11B                                                                                  |
| arachidonic acid         |        | chemical - endogenous mammalian   | Inhibited | -2,519 | -2,291 | 0,071  | 4,04E-05 | 7,21E-04 | ABCA1,ABCG1,EDN1,EGR1,F3,FOS,JUN,KLF6,LDLR,NFKBIA,RGS2                                                                                                        |
| STAT5A                   | -0,106 | transcription regulator           | Inhibited | -3,014 | -2,729 | 0,087  | 4,10E-05 | 7,29E-04 | APOE,CASP6,CDKN1A,CDKN1B,CEBPB,CISH,DUSP5,FOS,FOSB,FOSL2,GADD45A,IL6R,MCL1,PIM1,PPFIBP2,RIN2,RPA1,SOCS2,TACSTD2,ZFP36                                         |
| AGT                      | 0,470  | growth factor                     | Inhibited | -3,845 | -2,837 | 0,207  | 4,19E-05 | 7,39E-04 | ADD3,ANK3,ATF3,BDKRB2,CCL4,CCN2,CDKN1A,CDKN1B,CXCL2,DA B2,DUSP1,EDN1,EGR1,F3,FOS,HBEGF,HES1,ITPR2,JUN,LDLR,NR4A1,PPP1R3C,RGS2,SERPINE1,SGK1,ZFP36,ZNF268      |
| STAT6                    |        | transcription regulator           |           | -1,889 | -1,601 | 0,069  | 4,37E-05 | 7,64E-04 | APOE,APOLD1,CASP6,CDKN1A,CDKN1B,CISH,CXCL2,DDAH1,EGR1,FGFR10P,GADD45B,IER2,IFIH1,IL4R,KMO,MYO6,NEDD9,NFKBIA,PD K4,PROS1,SERPINE1,SOCS2,TFEC,ZFP36             |
| TFAP4                    | -0,043 | transcription regulator           |           | 0,348  | 0,378  | 0,011  | 4,47E-05 | 7,71E-04 | CCNG2,CDKN1A,EGR1,FOS,GDF15,GMFB,RHOBTB3                                                                                                                      |
| NR1H3                    | 0,078  | ligand-dependent nuclear receptor |           | 1,346  | 1,516  | 0,056  | 5,13E-05 | 8,73E-04 | ABCA1,ABCG1,ANGPTL3,APOE,ATF3,CCL4,CCNA2,CDKN1A,CDKN1B,CXCL2,GAS6,LDLR,MYLIP,NFKBIA,NR0B2,SREBF2,TRIB1                                                        |
| KLF2                     | -0,312 | transcription regulator           |           | 1,853  | 1,615  | -0,070 | 5,52E-05 | 9,29E-04 | CCL4,CCN2,CDKN1A,CXCL2,EDN1,F3,GADD45A,HBB,IL6R,JUNB,NFKBIA,PROS1,PTGDS,RGS3,SERPINE1                                                                         |
| PRKCA                    | 0,016  | kinase                            |           | -2,447 | -1,814 | 0,210  | 5,57E-05 | 9,35E-04 | CCN2,CDKN1A,CXCL2,EGR1,FOS,GDF15,HES1,JUN,NFKBIA,RHOBTB3,SERPINE1,USP8                                                                                        |

Table S3. Plum

| Upstream Regulator | Expr Log Ratio | Molecule Type                   | Predicted Activation State | Bias-corrected z-score | Activation z-score | Bias Term | p-value of overlap | B-H corrected p-value | Target Molecules in Dataset                                                                                                                                                                                                                                                                                                                                                                                                                                                                                                                                                                                                                                                                                                                                                                                                                                                                                                                                                                                                                                                                                                                                                                                                                                                                                                                                                                                                                                                                                                                                                                                                                                                                                                                                                                                                                                                                                                                                                                                                                                                                                                                                                                                                                                                                                                                                                                                                                                                                                                                                                                                                                                                                                                                                                                                                                                                                                                                                                                                                                                                                                                                                                                                                                                                                                                                                                                                                                                                                                                                                                                                                                                                                                                                                                                                                                                                                                                                                                                                                                                                                                                                                                                                                                                                                                                                                                                                                                                                                                                                                                                                                                                                                                                                                                                                                                                                                                                                                                                                                                                                                                                                                                                                                                                                                                                                                                                                                                                                                                                                                                                                                                                                                                                                                                                                                                                                                                                                                                                                                                                                                                                                                                                                                                                                                                                                                                                                                                                                                                                                                                                                                                                                                                                                                                                                                                                                                                                                                                                                                                                                                                                                                                                                                                                                                                                                                                                                                                                                                                                                                                                                                                                                                                                                                                                                                                                                                                                                                                                                                                                                                                                                                                                                                                                                                                                                                                                                                                                                                                                                                                                                                                                                                                                                                                                                                                                                                                                                                                                                                                                                                                                                                                                                                                                                                                                                                                                                                                                                                                                                                                                                                                                                                                                                                                                                                                                                                                                                                                                                                                                                                                                                                                                                                                                                                                                                                                  |
|--------------------|----------------|---------------------------------|----------------------------|------------------------|--------------------|-----------|--------------------|-----------------------|------------------------------------------------------------------------------------------------------------------------------------------------------------------------------------------------------------------------------------------------------------------------------------------------------------------------------------------------------------------------------------------------------------------------------------------------------------------------------------------------------------------------------------------------------------------------------------------------------------------------------------------------------------------------------------------------------------------------------------------------------------------------------------------------------------------------------------------------------------------------------------------------------------------------------------------------------------------------------------------------------------------------------------------------------------------------------------------------------------------------------------------------------------------------------------------------------------------------------------------------------------------------------------------------------------------------------------------------------------------------------------------------------------------------------------------------------------------------------------------------------------------------------------------------------------------------------------------------------------------------------------------------------------------------------------------------------------------------------------------------------------------------------------------------------------------------------------------------------------------------------------------------------------------------------------------------------------------------------------------------------------------------------------------------------------------------------------------------------------------------------------------------------------------------------------------------------------------------------------------------------------------------------------------------------------------------------------------------------------------------------------------------------------------------------------------------------------------------------------------------------------------------------------------------------------------------------------------------------------------------------------------------------------------------------------------------------------------------------------------------------------------------------------------------------------------------------------------------------------------------------------------------------------------------------------------------------------------------------------------------------------------------------------------------------------------------------------------------------------------------------------------------------------------------------------------------------------------------------------------------------------------------------------------------------------------------------------------------------------------------------------------------------------------------------------------------------------------------------------------------------------------------------------------------------------------------------------------------------------------------------------------------------------------------------------------------------------------------------------------------------------------------------------------------------------------------------------------------------------------------------------------------------------------------------------------------------------------------------------------------------------------------------------------------------------------------------------------------------------------------------------------------------------------------------------------------------------------------------------------------------------------------------------------------------------------------------------------------------------------------------------------------------------------------------------------------------------------------------------------------------------------------------------------------------------------------------------------------------------------------------------------------------------------------------------------------------------------------------------------------------------------------------------------------------------------------------------------------------------------------------------------------------------------------------------------------------------------------------------------------------------------------------------------------------------------------------------------------------------------------------------------------------------------------------------------------------------------------------------------------------------------------------------------------------------------------------------------------------------------------------------------------------------------------------------------------------------------------------------------------------------------------------------------------------------------------------------------------------------------------------------------------------------------------------------------------------------------------------------------------------------------------------------------------------------------------------------------------------------------------------------------------------------------------------------------------------------------------------------------------------------------------------------------------------------------------------------------------------------------------------------------------------------------------------------------------------------------------------------------------------------------------------------------------------------------------------------------------------------------------------------------------------------------------------------------------------------------------------------------------------------------------------------------------------------------------------------------------------------------------------------------------------------------------------------------------------------------------------------------------------------------------------------------------------------------------------------------------------------------------------------------------------------------------------------------------------------------------------------------------------------------------------------------------------------------------------------------------------------------------------------------------------------------------------------------------------------------------------------------------------------------------------------------------------------------------------------------------------------------------------------------------------------------------------------------------------------------------------------------------------------------------------------------------------------------------------------------------------------------------------------------------------------------------------------------------------------------------------------------------------------------------------------------------------------------------------------------------------------------------------------------------------------------------------------------------------------------------------------------------------------------------------------------------------------------------------------------------------------------------------------------------------------------------------------------------------------------------------------------------------------------------------------------------------------------------------------------------------------------------------------------------------------------------------------------------------------------------------------------------------------------------------------------------------------------------------------------------------------------------------------------------------------------------------------------------------------------------------------------------------------------------------------------------------------------------------------------------------------------------------------------------------------------------------------------------------------------------------------------------------------------------------------------------------------------------------------------------------------------------------------------------------------------------------------------------------------------------------------------------------------------------------------------------------------------------------------------------------------------------------------------------------------------------------------------------------------------------------------------------------------------------------------------------------------------------------------------------------------------------------------------------------------------------------------------------------------------------------------------------------------------------------------------------------------------------------------------------------------------------------------------------------------------------------------------------------------------------------------------------------------------------------------------------------------------------------------------------------------------------------------------------------------------------------------------------------------------------------------------------------------------------------------------------------------------------------------------------------------------------------|
| beta-estradiol     |                | chemical - endogenous mammalian |                            | -1,779                 | -1,249             | 0,026     | 1,12E-50           | 9,24E-47              | A2M,ABCA1,ABCG2,ABLIM1,ACAA1,ACKR2,ACKR3,ACOX2,ACTL6A,ADAMTS1,ADCY1,ADGRF5,ADIPOQ,ADIRF,ADM,ADM2,AFP,AGRN,AHR,ALB,ALDH18A1,ALDH7A1,ALDOA,ALPG,ANKH,ANPEP,ANXA1,ANXA3,ANXA4,AP1G1,APBA1,APBB1,APOA1,APOD,APP,AQP5,ARC,ARMT1,ASB9,ATF3,AURKA,AVP,BAG1,BAX,BAZ1A,BCAS3,BHLHE40,BID,BLNK,BMP5,BMPR1B,BNIP3L,BTG2,BUB3,C3,CA2,CACNB4,CALM1 (includes others),CAMK2A,CAP2,CASP3,CASP4,CAST,CAV2,CBX6,CCL20,CCL25,CCN2,CCN5,CCNA2,CCNB1,CCNB2,CCR4,CT2,CD24,CD44,CD74,CDC123,CDC20,CDC23,CDC73,CDH15,CDK1,CDK18,CDKN1B,CDKN1C,CENPM,CFB,CGA,CHI3L1,CITED2,CLCA1,CLCN3,CLDN1,CLDN11,CLU,CNTFR,COL1A1,COL1A2,COL3A1,COMT,COX6A2,CRAPB2,CRK,CRNKL1,CSE1L,CSHL1,CST8,CSTB,CTLA4,CTSD,CUBN,CXADR,CYB5A,CYBB,CYP24A1,CYP2A6 (includes others),CYP2B6,CYP3A4,DBN1,DCAF6,DDDB2,DDIT3,DDOST,DDR1,DEFB1,DERL1,DIO1,DLG3,DMTN,DNAJC3,DNPH1,DRD2,DRD5,DSCAM,DUSP1,DYNLL1,DYRK2,ECHDC2,EGF,EGR1,EGR3,EIF3A,EIF3D,EIF3J,ELK1,ELOC,ENO1,ERF,ESR1,ESRRA,EXT2,F12,F2RL1,F3,FAAH,FADD,FADS3,FA M111A,FARP1,FAS,FBN1,FCGRT,FEZ2,FGF1,FGFBP1,FHL1,FHL2,FLOT1,FN1,FOS,FOSB,FOSL1,FOXC2,FOXO1,FOX P3,FRK,FSTL1,G6PC,GADD45A,GADD45B,GADD45G,GALNT1,GALNT7,GARS1,GBP2,GCH1,GHR,GHRH,GK,GLRB,GM2A,GMFB,GNB1,GNL3,GNRH2,GP2,GPR12,GRB10,GSTA1,GSTP1,GTF2IRD1,GUCY1A1,GUCY1B1,GYP,HADH,HAND1,HAPLN2,HBB,HBEGF,HDAC1,HIF1A,HLA-A,HLA-DRB1,HLA-E,HMOX1,HNF1B,HOXA10,HPGD,HRAS,HSD11B2,HSD17B4,HSP90B1,HSPA4,HSPA5,HSPB8,HTR5A,HTR6,HTRA1,IER2,IFI30,IFNGR2,IFRD1,IFT122,IGFBP4,IGSF6,IL13,IL15,IL18,IL6R,IL7,IMPDH2,INHA,INPP5F,INPP5J,IPO4,IQGAP1,IRF7,ISG15,ITGAE,ITGAV,ITGB2,ITGB3,ITIH4,IVL,JAK1,JUNB,JUND,KCNN2,KCNN3,KDELR3,KIF1A,KITLG,KLF9,KLK1,KLK11,KLK3,KLK5,KLK6, KPNA2, KPNA4, KRAS, KRT19, KRT4, KRT81, KRT83, KYNU, LAMB1, LAMB2, LAPTM5, LCN2, LDLR, LEFTY2, LEP, LEPR, LEPROT, LGALS3BP, LHB, LIPC, LPL, LPO, LTB, LTF, LUM, LYZ, MAD2L1, MAP2K3, MAPK1, MAPT, MB, MBD4, MCAM, MCM2, MCM3, MCM5, MET, MGLL, MMD, MME, MMP1, MMP7, MPC1, MPZ, MT1X, MUC1, MUC5B, MX1, MYBL2, MYL12A, MYOD1, MYOF, MYOG, NAMPT, NARS1, NCF2, NDRG1, NEDD4L, NELL2, NET1, NFE2L2, NFKB1, NFKBIA, NME1, NOS1, NOS2, NPPA, NPTX1, NR0B2, NR2F1, NR4A1, NR4A3, NRP1, NTRK1, NTRK2, NTRK3, NUPR1, PAB1, PAB2, PAB3, PAB4, PAB5, PAB6, PAB7, PAB8, PAB9, PAB10, PAB11, PAB12, PAB13, PAB14, PAB15, PAB16, PAB17, PAB18, PAB19, PAB20, PAB21, PAB22, PAB23, PAB24, PAB25, PAB26, PAB27, PAB28, PAB29, PAB30, PAB31, PAB32, PAB33, PAB34, PAB35, PAB36, PAB37, PAB38, PAB39, PAB40, PAB41, PAB42, PAB43, PAB44, PAB45, PAB46, PAB47, PAB48, PAB49, PAB50, PAB51, PAB52, PAB53, PAB54, PAB55, PAB56, PAB57, PAB58, PAB59, PAB60, PAB61, PAB62, PAB63, PAB64, PAB65, PAB66, PAB67, PAB68, PAB69, PAB70, PAB71, PAB72, PAB73, PAB74, PAB75, PAB76, PAB77, PAB78, PAB79, PAB80, PAB81, PAB82, PAB83, PAB84, PAB85, PAB86, PAB87, PAB88, PAB89, PAB90, PAB91, PAB92, PAB93, PAB94, PAB95, PAB96, PAB97, PAB98, PAB99, PAB100, PAB101, PAB102, PAB103, PAB104, PAB105, PAB106, PAB107, PAB108, PAB109, PAB110, PAB111, PAB112, PAB113, PAB114, PAB115, PAB116, PAB117, PAB118, PAB119, PAB120, PAB121, PAB122, PAB123, PAB124, PAB125, PAB126, PAB127, PAB128, PAB129, PAB130, PAB131, PAB132, PAB133, PAB134, PAB135, PAB136, PAB137, PAB138, PAB139, PAB140, PAB141, PAB142, PAB143, PAB144, PAB145, PAB146, PAB147, PAB148, PAB149, PAB150, PAB151, PAB152, PAB153, PAB154, PAB155, PAB156, PAB157, PAB158, PAB159, PAB160, PAB161, PAB162, PAB163, PAB164, PAB165, PAB166, PAB167, PAB168, PAB169, PAB170, PAB171, PAB172, PAB173, PAB174, PAB175, PAB176, PAB177, PAB178, PAB179, PAB180, PAB181, PAB182, PAB183, PAB184, PAB185, PAB186, PAB187, PAB188, PAB189, PAB190, PAB191, PAB192, PAB193, PAB194, PAB195, PAB196, PAB197, PAB198, PAB199, PAB200, PAB201, PAB202, PAB203, PAB204, PAB205, PAB206, PAB207, PAB208, PAB209, PAB210, PAB211, PAB212, PAB213, PAB214, PAB215, PAB216, PAB217, PAB218, PAB219, PAB220, PAB221, PAB222, PAB223, PAB224, PAB225, PAB226, PAB227, PAB228, PAB229, PAB230, PAB231, PAB232, PAB233, PAB234, PAB235, PAB236, PAB237, PAB238, PAB239, PAB240, PAB241, PAB242, PAB243, PAB244, PAB245, PAB246, PAB247, PAB248, PAB249, PAB250, PAB251, PAB252, PAB253, PAB254, PAB255, PAB256, PAB257, PAB258, PAB259, PAB260, PAB261, PAB262, PAB263, PAB264, PAB265, PAB266, PAB267, PAB268, PAB269, PAB270, PAB271, PAB272, PAB273, PAB274, PAB275, PAB276, PAB277, PAB278, PAB279, PAB280, PAB281, PAB282, PAB283, PAB284, PAB285, PAB286, PAB287, PAB288, PAB289, PAB290, PAB291, PAB292, PAB293, PAB294, PAB295, PAB296, PAB297, PAB298, PAB299, PAB300, PAB301, PAB302, PAB303, PAB304, PAB305, PAB306, PAB307, PAB308, PAB309, PAB310, PAB311, PAB312, PAB313, PAB314, PAB315, PAB316, PAB317, PAB318, PAB319, PAB320, PAB321, PAB322, PAB323, PAB324, PAB325, PAB326, PAB327, PAB328, PAB329, PAB330, PAB331, PAB332, PAB333, PAB334, PAB335, PAB336, PAB337, PAB338, PAB339, PAB340, PAB341, PAB342, PAB343, PAB344, PAB345, PAB346, PAB347, PAB348, PAB349, PAB350, PAB351, PAB352, PAB353, PAB354, PAB355, PAB356, PAB357, PAB358, PAB359, PAB360, PAB361, PAB362, PAB363, PAB364, PAB365, PAB366, PAB367, PAB368, PAB369, PAB370, PAB371, PAB372, PAB373, PAB374, PAB375, PAB376, PAB377, PAB378, PAB379, PAB380, PAB381, PAB382, PAB383, PAB384, PAB385, PAB386, PAB387, PAB388, PAB389, PAB390, PAB391, PAB392, PAB393, PAB394, PAB395, PAB396, PAB397, PAB398, PAB399, PAB400, PAB401, PAB402, PAB403, PAB404, PAB405, PAB406, PAB407, PAB408, PAB409, PAB410, PAB411, PAB412, PAB413, PAB414, PAB415, PAB416, PAB417, PAB418, PAB419, PAB420, PAB421, PAB422, PAB423, PAB424, PAB425, PAB426, PAB427, PAB428, PAB429, PAB430, PAB431, PAB432, PAB433, PAB434, PAB435, PAB436, PAB437, PAB438, PAB439, PAB440, PAB441, PAB442, PAB443, PAB444, PAB445, PAB446, PAB447, PAB448, PAB449, PAB450, PAB451, PAB452, PAB453, PAB454, PAB455, PAB456, PAB457, PAB458, PAB459, PAB460, PAB461, PAB462, PAB463, PAB464, PAB465, PAB466, PAB467, PAB468, PAB469, PAB470, PAB471, PAB472, PAB473, PAB474, PAB475, PAB476, PAB477, PAB478, PAB479, PAB480, PAB481, PAB482, PAB483, PAB484, PAB485, PAB486, PAB487, PAB488, PAB489, PAB490, PAB491, PAB492, PAB493, PAB494, PAB495, PAB496, PAB497, PAB498, PAB499, PAB500, PAB501, PAB502, PAB503, PAB504, PAB505, PAB506, PAB507, PAB508, PAB509, PAB510, PAB511, PAB512, PAB513, PAB514, PAB515, PAB516, PAB517, PAB518, PAB519, PAB520, PAB521, PAB522, PAB523, PAB524, PAB525, PAB526, PAB527, PAB528, PAB529, PAB530, PAB531, PAB532, PAB533, PAB534, PAB535, PAB536, PAB537, PAB538, PAB539, PAB540, PAB541, PAB542, PAB543, PAB544, PAB545, PAB546, PAB547, PAB548, PAB549, PAB550, PAB551, PAB552, PAB553, PAB554, PAB555, PAB556, PAB557, PAB558, PAB559, PAB560, PAB561, PAB562, PAB563, PAB564, PAB565, PAB566, PAB567, PAB568, PAB569, PAB570, PAB571, PAB572, PAB573, PAB574, PAB575, PAB576, PAB577, PAB578, PAB579, PAB580, PAB581, PAB582, PAB583, PAB584, PAB585, PAB586, PAB587, PAB588, PAB589, PAB590, PAB591, PAB592, PAB593, PAB594, PAB595, PAB596, PAB597, PAB598, PAB599, PAB600, PAB601, PAB602, PAB603, PAB604, PAB605, PAB606, PAB607, PAB608, PAB609, PAB610, PAB611, PAB612, PAB613, PAB614, PAB615, PAB616, PAB617, PAB618, PAB619, PAB620, PAB621, PAB622, PAB623, PAB624, PAB625, PAB626, PAB627, PAB628, PAB629, PAB630, PAB631, PAB632, PAB633, PAB634, PAB635, PAB636, PAB637, PAB638, PAB639, PAB640, PAB641, PAB642, PAB643, PAB644, PAB645, PAB646, PAB647, PAB648, PAB649, PAB650, PAB651, PAB652, PAB653, PAB654, PAB655, PAB656, PAB657, PAB658, PAB659, PAB660, PAB661, PAB662, PAB663, PAB664, PAB665, PAB666, PAB667, PAB668, PAB669, PAB670, PAB671, PAB672, PAB673, PAB674, PAB675, PAB676, PAB677, PAB678, PAB679, PAB680, PAB681, PAB682, PAB683, PAB684, PAB685, PAB686, PAB687, PAB688, PAB689, PAB690, PAB691, PAB692, PAB693, PAB694, PAB695, PAB696, PAB697, PAB698, PAB699, PAB700, PAB701, PAB702, PAB703, PAB704, PAB705, PAB706, PAB707, PAB708, PAB709, PAB710, PAB711, PAB712, PAB713, PAB714, PAB715, PAB716, PAB717, PAB718, PAB719, PAB720, PAB721, PAB722, PAB723, PAB724, PAB725, PAB726, PAB727, PAB728, PAB729, PAB730, PAB731, PAB732, PAB733, PAB734, PAB735, PAB736, PAB737, PAB738, PAB739, PAB740, PAB741, PAB742, PAB743, PAB744, PAB745, PAB746, PAB747, PAB748, PAB749, PAB750, PAB751, PAB752, PAB753, PAB754, PAB755, PAB756, PAB757, PAB758, PAB759, PAB760, PAB761, PAB762, PAB763, PAB764, PAB765, PAB766, PAB767, PAB768, PAB769, PAB770, PAB771, PAB772, PAB773, PAB774, PAB775, PAB776, PAB777, PAB778, PAB779, PAB780, PAB781, PAB782, PAB783, PAB784, PAB785, PAB786, PAB787, PAB788, PAB789, PAB790, PAB791, PAB792, PAB793, PAB794, PAB795, PAB796, PAB797, PAB798, PAB799, PAB800, PAB801, PAB802, PAB803, PAB804, PAB805, PAB806, PAB807, PAB808, PAB809, PAB810, PAB811, PAB812, PAB813, PAB814, PAB815, PAB816, PAB817, PAB818, PAB819, PAB820, PAB821, PAB822, PAB823, PAB824, PAB825, PAB826, PAB827, PAB828, PAB829, PAB830, PAB831, PAB832, PAB833, PAB834, PAB835, PAB836, PAB837, PAB838, PAB839, PAB840, PAB841, PAB842, PAB843, PAB844, PAB845, PAB846, PAB847, PAB848, PAB849, PAB850, PAB851, PAB852, PAB853, PAB854, PAB855, PAB856, PAB857, PAB858, PAB859, PAB860, PAB861, PAB862, PAB863, PAB864, PAB865, PAB866, PAB867, PAB868, PAB869, PAB870, PAB871, PAB872, PAB873, PAB874, PAB875, PAB876, PAB877, PAB878, PAB879, PAB880, PAB881, PAB882, PAB883, PAB884, PAB885, PAB886, PAB887, PAB888, PAB889, PAB890, PAB891, PAB892, PAB893, PAB894, PAB895, PAB896, PAB897, PAB898, PAB899, PAB900, PAB901, PAB902, PAB903, PAB904, PAB905, PAB906, PAB907, PAB908, PAB909, PAB910, PAB911, PAB912, PAB913, PAB914, PAB915, PAB916, PAB917, PAB918, PAB919, PAB920, PAB921, PAB922, PAB923, PAB924, PAB925, PAB926, PAB927, PAB928, PAB929, PAB930, PAB931, PAB932, PAB933, PAB934, PAB935, PAB936, PAB937, PAB938, PAB939, PAB940, PAB941, PAB942, PAB943, PAB944, PAB945, PAB946, PAB947, PAB948, PAB949, PAB950, PAB951, PAB952, PAB953, PAB954, PAB955, PAB956, PAB957, PAB958, PAB959, PAB960, PAB961, PAB962, PAB963, PAB964, PAB965, PAB966, PAB967, PAB968, PAB969, PAB970, PAB971, PAB972, PAB973, PAB974, PAB975, PAB976, PAB977, PAB978, PAB979, PAB980, PAB981, PAB982, PAB983, PAB984, PAB985, PAB986, PAB987, PAB988, PAB989, PAB990, PAB991, PAB992, PAB993, PAB994, PAB995, PAB996, PAB997, PAB998, PAB999, PAB1000 |

|       |               |           |       |       |       |          |          |                                                                                                                                                                                                                                                                                                                                                                                                                                                                                                                                                                                                                                                                                                                                                                                                                                                                                                                                                                                                                                                                                                                                                                                                                                                                                                                                                                                                                                                                                                                                                                                                                                                                                                                                                                                                                                                                                                                                                                                                                                                                                                |
|-------|---------------|-----------|-------|-------|-------|----------|----------|------------------------------------------------------------------------------------------------------------------------------------------------------------------------------------------------------------------------------------------------------------------------------------------------------------------------------------------------------------------------------------------------------------------------------------------------------------------------------------------------------------------------------------------------------------------------------------------------------------------------------------------------------------------------------------------------------------------------------------------------------------------------------------------------------------------------------------------------------------------------------------------------------------------------------------------------------------------------------------------------------------------------------------------------------------------------------------------------------------------------------------------------------------------------------------------------------------------------------------------------------------------------------------------------------------------------------------------------------------------------------------------------------------------------------------------------------------------------------------------------------------------------------------------------------------------------------------------------------------------------------------------------------------------------------------------------------------------------------------------------------------------------------------------------------------------------------------------------------------------------------------------------------------------------------------------------------------------------------------------------------------------------------------------------------------------------------------------------|
| TGFB1 | growth factor | Activated | 1,926 | 2,387 | 0,026 | 9,98E-43 | 4,12E-39 | <p>AASS,ABCA1,ABCE1,ABCG1,ABCG2,ABL1,ACKR2,ACTN1,ADAM10,ADGRB1,ADI1,ADIPOQ,ADM,AFM,AFP,AGR2,AHR,AKR1C1/AKR1C2,ALB,ALDH18A1,ALDH2,ALDH3A2,ALDOA,ALDOB,ALOX12,ALOX5,ALOX5AP,ANKH,ANPEP,ANXA11,ANXA2,APLNR,APOB,APP,AQP8,ARF1,ARF4,ARPC2,ASNS,ASS1,ATG5,ATP13A3,AVP,B2M,BAX,BECN1,BHLHE40,BMP7,BNIP3L,BUD31,C1QA,C1QB,C1R,C1S,C2,C3,CALM1 (includes others),CALML3,CAMK2G,CAMK2N1,CAP1,CAPNS1,CAPRI N1,CASP1,CASP3,CASP4,CASP8,CAT,CAV2,CAVIN2,CFB,CCL20,CCN2,CCN5,CCNA2,CCNB1,CCNB2,CCR4,CCT2,CCT5,CCT6A,CD163,CD44,CD59,CD83,CDC20,CDC7,CDK1,CDK2AP1,CDK4,CDKN1B,CDKN1C,CDKN3,CFB,CFD,CFI,CHI3L1,CHRN4,CHST8,CIDEC,CITED2,CKS2,CLDN1,CLU,COL18A1,COL1A1,COL1A2,COL3A1,COL4A1,COL4A2,COL6A3,CORO1C,CRIP2,CRMP1,CSR2,CTCF,CTLA4,CTSD,CTSS,CX3CR1,CXADR,CYBA,CYBB,CYP11B2,CYP27B1,CYP3A7,DAD1,DDB2,DLX5,DMTN,DNAJB6,DNMT1,DSG2,DTX4,DUSP1,DYNLL1,DYRK2,EGF,EGR1,EGR3,EIF4A3,ELAVL1,ELK3,ELN,ENO1,ENO3,EPCAM,ERF,ESM1,ESPL1,EXT1,EXT2,F12,F2RL1,F3,FAM110B,FAS,FBN1,FCER1G,FXR,FERMT2,FGF5,FGF6,FGFBP1,FHL1,FILIP1L,FLRT1,FN1, FNDC3B,FOS,FOSB,FOXC2,FOXO1,FOXP3,FUBP1,FURIN,FUS,FUT7,FZD1,G6PC,GAD1,GADD45A,GADD45B,GARS1,GATM,GBP1,GBP2,GDPD5,GIN1,GLI1,GLRX2,GNAS,GNNG7,GNL1,GPI,GPR12,GPR21,GZMA,HADH,HAT1,HBEGF,HEXA,HEXB,HIF1A,HK1,HLA-DMA,HLA-DQB1,HMOX1,HNF1A,HNF4A,HNMT,HNRNPAB,HPGD,HS D3B2,HSPA5,HTRA1,IDI1,IER2,IFI16,IFI30,IFIH1,IFIT3,IFRD1,IGFBP4,IL10RA,IL13,IL15,IL17RB,IL18,IL32,IL36A,IL6R,IMPDH1,INHA,INTS13,ITGA6,ITGA7,ITGAE,ITGAV,ITGB2,ITGB3,ITGB6,IVL,JUNB,JUND,KDEL2,KDEL3,KDM5B,KITLG, KLF15,KLF9,KLK11,KLK3,KRAS,KRT10,KRT19,KRT81,LAMC1,LASP1,LBR,LCN2,LDB1,LDLR,LEP,LIN37,LIPF,LOXL1,LPCAT3,LPL,LSR,LTA,LTBP2,MAP2K3,MAP3K1,MAPK1,MAPK13,MCM2,MET,MGAT3,MIA2,MID1,MITF,MLXIPL,MMP1,MMP7,MPRIIP,MPZ,MSH6,MSN,MST1R,MTHFD2,MXI1,MYBL2,MYL12A,MYL6,MYOD1,MYOF,MYOG,NAA80,NAB2,NAMPT,NBEA,NCF2,NCR3,NDC80,NET1,NEU3,NFKBIA,NGF,NME1,NMNAT2,NNMT,NOC3L,NOS2,NPPA,NR4A1,NR4A3,NRP1,NUCB2,NUP153,NUP62,OGA,OPN3,OVOL1,P4HA1,PAK3,PAPPA,PCNA,PCOLCE2,PDCC1,PDCC4,PDK2,PECAM1,PFKP,PIGF,PIM1,PKM,PLA1A,PLAGL2,PLK2,PLOD1,PLOD2,PLS3,PLSCR1,PNP,PODXL,POLE2,POSTN,PPARG,PPI</p> |
|-------|---------------|-----------|-------|-------|-------|----------|----------|------------------------------------------------------------------------------------------------------------------------------------------------------------------------------------------------------------------------------------------------------------------------------------------------------------------------------------------------------------------------------------------------------------------------------------------------------------------------------------------------------------------------------------------------------------------------------------------------------------------------------------------------------------------------------------------------------------------------------------------------------------------------------------------------------------------------------------------------------------------------------------------------------------------------------------------------------------------------------------------------------------------------------------------------------------------------------------------------------------------------------------------------------------------------------------------------------------------------------------------------------------------------------------------------------------------------------------------------------------------------------------------------------------------------------------------------------------------------------------------------------------------------------------------------------------------------------------------------------------------------------------------------------------------------------------------------------------------------------------------------------------------------------------------------------------------------------------------------------------------------------------------------------------------------------------------------------------------------------------------------------------------------------------------------------------------------------------------------|

tretinoin

chemical -  
endogenous  
mammalian

-0,718

-0,233

0,027

3,63E-40

9,98E-37

A2M,AATK,ABCA1,ABCE1,ABCG1,ABI1,ABLIM1,ACACB,ACKR2,ADAM10,ADAM11,ADAR,ADM,AFP,AGO1,AHR,AIMP1,AKAP12,ALAS1,ALDH1A1,ALDH1A3,ALDH3A1,ALOX5,ALPL,ANPEP,ANXA1,ANXA2,ANXA5,APLNR,APOC3,APOD,APP,ARHGAP29,ARHGAP1,ASNS,ATR,AURKA,BHLHE40,BHMT,BID,BIRC2,BMPR1B,BNIP3L,BPIFA1,BTG2,C1QA,C3,C2,CA8,CACNA1S,CALM1 (includes others),CALML3,CAPN2,CASP1,CASP3,CASP6,CASP7,CAVIN3,CBFB,CCL20,CCL22,CCN2,CCNA2,CCNB1,CCNC,CC T5,CD44,CD47,CD52,CD53,CD63,CD70,CD74,CDC20,CDC73,CDH6,CDK4,CDKN1B,CDKN3,CDX1,CDX2,CEBPE,CGA,CHN2,CHRM2,CITED2,CKS2,CLDN1,CLDN11,CLPS,COL1A1,COL1A2,COL3A1,COL4A1,COL4A2,COL6A3,CRABP1,CRABP2,CRAT,CSE1L,CSF3,CSSL1,CSNK1A1,CTLA4,CTNNA3,CTSD,CTSS,CUBN,CX3CR1,CXCL6,CYBB,CYP11B2,CYP26A1,CYP2B6,CYP4A11,DAAM2,DAD1,DAP3,DAPK2,DBI,D CSTAMP,DDB2,DDIT3,DDX58,DDX60,DHRS3,DHX15,DIO3,DLEU1,DLGAP5,DNMT1,DPP4,DRD2,DTL,DUSP1,DYNLL1,E2F4,ECI2,EFNB1,EGR1,EIF4G1,EIF5,EIF5B,ELAVL3,ELN,ELOC,EMP3,EPCAM,EPHX1,F3,FCER1G,FGF5,FLRT1,FN1,FOS,FOSL1,FOXP3,FRAT2,FUT4,G0S2,GARS1,GATA6,GCA,GCK,GDE1,GDF2,GDF9,GHR,GIMAP6,GJB4,GJB5,GLI1,GM2A,GNAS,GPR21,GRB10,GSPT2,GSTP1,GZMA,HBEGF,HDAC1,HK1,HLA-A,HLA-B,HLA-C,HLA-DMB,HMOX1,HNF1A,HNF1B,HNF4A,HNRNP,HOXA10,HOXB1,HOXB6,HOXB7,HPRT1,HS3ST1,HSF4,IFI16,IFI35,IFI44,IFIH1,IFIT2,IFIT3,IFIT5,IFITM1,IFNGR1,IGFBP4,IL10RA,IL13,IL15,IL1RAPL1,IL6R,IMPDH2,IRF9,ISG15,ITGA6,ITGAE,ITGB2,ITGB3,IVL,JAK1,KITLG,KLF15,KLF9,KLK3,KRT19,KRT31,LAMB1,LCN2,LEFTY2,LEPR,LGALS1,LGALS3BP,LIPA,LTF,LY6G6D,LYN,LYPD1,M6PR,MAP2K3,MAP3K1,MAP3K10,MAPK10,MAPK8,MARCKSL1,MC1R,MDK,MGST3,MID1,MLF2,MMP1,MMP7,MRAS,MTHFD2,MUC5B,MYBL2,MYOD1,MYOG,NAE1,NCF2,NDRG1,NES,NEUROD6,NEUROG1,NFE2L2,NFKB1,NKX2-5,NMI,NOS2,NPHS1,NPHS2,NPPA,NR0B2,NR2F1,NR2F2,NRGN,NRP1,NTRK3,OAS1,OAT,ODC1,OLFM4,PAM,PCK1,PDCD4,PDE1B,PDIA2,PDYN,PFN1,PGD,PIM1,PKP2,PLAAT4,PLCB2,PLCE1,PLK2,PLK3,PLOD3,PLS3,PLSCR1,PNP,POSTN,PPARA,PPARG,PPP1R16B,PRG2,PRKCA,PRKCD,PRLL,PROM1,PRPH,PSMB10,PSMB8,PSMB9,PSMC4,PTEN,PTGDS,PTPRC,PTPRU,RABGGTB,RAD23B,RAE1,RAI14,RALB,RAN,RARG,RARRES1,RB1,RBP1,RFC2,RFC4,RHOA,RLBP1,RORC,RPA1,RPS19,RTP4,RUVBL1,RXRA,S100A10,S



|       |        |                                   |        |        |       |          |          |                                                                                                                                                                                                                                                                                                                                                                                                                                                                                                                                                                                                                                                                                                                                                                                                                                                                                                                                                                                                                                                                                                                                                                                                                                                                                                                                                                                                                                                                                                                                                                                                                                                                                                                                                                                                                                                                                                                                                                                                                                                                                                                                                                                                                                                                              |
|-------|--------|-----------------------------------|--------|--------|-------|----------|----------|------------------------------------------------------------------------------------------------------------------------------------------------------------------------------------------------------------------------------------------------------------------------------------------------------------------------------------------------------------------------------------------------------------------------------------------------------------------------------------------------------------------------------------------------------------------------------------------------------------------------------------------------------------------------------------------------------------------------------------------------------------------------------------------------------------------------------------------------------------------------------------------------------------------------------------------------------------------------------------------------------------------------------------------------------------------------------------------------------------------------------------------------------------------------------------------------------------------------------------------------------------------------------------------------------------------------------------------------------------------------------------------------------------------------------------------------------------------------------------------------------------------------------------------------------------------------------------------------------------------------------------------------------------------------------------------------------------------------------------------------------------------------------------------------------------------------------------------------------------------------------------------------------------------------------------------------------------------------------------------------------------------------------------------------------------------------------------------------------------------------------------------------------------------------------------------------------------------------------------------------------------------------------|
| HNF4A | -0,298 | transcription regulator Inhibited | -4,743 | -4,562 | 0,018 | 1,62E-34 | 2,68E-31 | AASS,ABCC3,ABCC6,ABCE1,ABCG1,ACAT1,ACO1,ACOT1<br>3,ACOX2,ACTN1,ACTR1A,ACTR3,ADGRB1,ADGRB2,ADH6<br>,ADIPOR1,AFP,AGA,AGTPBP1,AIMP1,AKAP13,AKR1B1,AK<br>R1C1/AKR1C2,ALB,ALDH1A1,ALDH1L1,ALDH2,ALDH3A1,A<br>LDOB,AMT,ANKRD49,ANPEP,ANXA5,APOA1,APOB,APOC<br>1,APOC3,APOH,APOM,APP,AQP8,ARFIP2,ARL4C,ARMC1,<br>ARMC6,ARMT1,ARPC5,ASNS,ATAD5,ATAT1,AVPI1,BAAT,<br>BAZ1A,BCKDHA,BCLAF1,BET1,BHMT,BLOC1S1,BMP5,BM<br>P7,BPHL,BST1,BUD31,C11orf71,C12orf49,C1S,C2,C3,CAP1<br>,CAPZA2,CAT,CBX3,CBX5,CCDC47,CCDC90B,CCL16,CCN<br>A2,CCNB1,CCT8,CDC123,CDC23,CDIPT,CDK1,CDK2AP2,<br>CDK8,CDKN1B,CENPU,CEP83,CETN3,CFAP20,CHCHD3,C<br>HI3L1,CHMP4A,CHRN2,CIDEC,CKS2,CLCN6,CLDN1,CLD<br>N3,CLPB,CLTCL1,COMMD9,COPB1,COPB2,CRABP2,CRA<br>T,CSK,CSNK2A1,CSTF2T,CTSA,CTS2,CUTC,CWF19L1,CX<br>ADR,CYP26A1,CYP2A6 (includes<br>others),CYP2B6,CYP2C8,CYP3A4,CYP3A5,CYP3A7,CYP7B<br>1,DAD1,DCK,DCTN4,DCTN5,DDOST,DDX25,DDX41,DDX47<br>,DERL1,DHRS7B,DNAJB9,DNPH1,DPAGT1,DTL,E2F4,ECI2<br>,EED,EGR1,EIF4ENIF1,EIF4G1,EIF5,ELP3,EPCAM,EPHX1,<br>ESYT1,ETNK2,F11,F11R,F12,FABP1,FABP2,FAM117A,FAN<br>CF,FAS,FBP1,FDX1,FDXR,FHL1,FKBP3,FLOT1,FOXO1,FR<br>K,FURIN,FUZ,FYCO1,FZD1,FZD6,G0S2,G6PC,GADD45B,G<br>ADD45G,GATA6,GDAP2,GIN1,GLA,GLYAT,GMDS,GNAI3,G<br>NL3,GOLIM4,GPX7,GRHPR,GRIK3,GSTA1,GTF2E1,GTF2H<br>1,GTF2I,HAAO,HAO1,HBEGF,HBQ1,HDAC6,HEXA,HIF1A,H<br>IKESHI,HLA-A,HLA-B,HLA-C,HLA-F,HLA-<br>G,HMGB2,HMGN4,HNF1A,HNF1B,HNF4A,HNRNP,HOXC8<br>,HPD,HPF1,HPX,HSD17B4,HSP90B1,HSPA5,IFI30,IFITM2,I<br>FNGR1,IFT122,IL10RA,IL15,INTS13,INTS9,IPO13,ISOC2,IT<br>GA6,ITGA9,ITIH4,JRKL,JUNB,KCNC3,KCNN2,KDM5C,KIF2<br>0A,KLF15,KLHL20,KLK14,KPNB1,KRT10,L2HGDH,LARS2,L<br>CN2,LDB1,LDLR,LEPR,LINC00574,LIPA,LIPC,LPCAT3,LPG<br>AT1,LSR,LTF,LYRM4,MAPK8IP2,MBD4,MCM3,MED7,META<br>P2,METTL18,MFSD1,MGST3,MICU1,MID1,MIS12,MLXIPL,M<br>PZL2,MRPL15,MRPL18,MRPL3,MRPL33,MRPL49,MSN,MT1<br>X,MTMR2,MTNR1A,MUTYH,MYL6,MYO1A,NAMPT,NAT10,N<br>BEA,NCBP2,NCK1,NDC1,NDC80,NDRG1,NFE2L2,NME1,N<br>MNAT2,NOC3L,NPC1L1,NROB2,NR2F1,NR2F2,NRAS,NSF,<br>NUP54,NUP62,OGA,ORMDL2,OSMR,OVOL1,PAPOLA,PCK<br>1,PCK2,PCNA,PDCD10,PDCD4,PDIA5,PK2,PK4,PELO,P<br>EPD,PERP,PHKB,PHTF1,PIGN,PIK3R3,PKLR,PKM,PKP2,P<br>LA2G2D,PLAGL2,PLD2,PLG,PLSCR1,PMEL,PMS1,PNLIPR<br>P1,PNMA1,PNP,PNPLA3,PODXL,POGLUT2,POLL,POP5,PP |
|-------|--------|-----------------------------------|--------|--------|-------|----------|----------|------------------------------------------------------------------------------------------------------------------------------------------------------------------------------------------------------------------------------------------------------------------------------------------------------------------------------------------------------------------------------------------------------------------------------------------------------------------------------------------------------------------------------------------------------------------------------------------------------------------------------------------------------------------------------------------------------------------------------------------------------------------------------------------------------------------------------------------------------------------------------------------------------------------------------------------------------------------------------------------------------------------------------------------------------------------------------------------------------------------------------------------------------------------------------------------------------------------------------------------------------------------------------------------------------------------------------------------------------------------------------------------------------------------------------------------------------------------------------------------------------------------------------------------------------------------------------------------------------------------------------------------------------------------------------------------------------------------------------------------------------------------------------------------------------------------------------------------------------------------------------------------------------------------------------------------------------------------------------------------------------------------------------------------------------------------------------------------------------------------------------------------------------------------------------------------------------------------------------------------------------------------------------|

|      |       |                                   |       |       |       |          |          |                                                                                                                                                                                                                                                                                                                                                                                                                                                                                                                                                                                                                                                                                                                                                                                                                                                                                                                                                                                                                                                                                                                                                                                                                                                                                                                                                                                                                                                                                                                                                                                                                                                                                                                                                                                                                                                                                                                                                                                                                                                                                                             |
|------|-------|-----------------------------------|-------|-------|-------|----------|----------|-------------------------------------------------------------------------------------------------------------------------------------------------------------------------------------------------------------------------------------------------------------------------------------------------------------------------------------------------------------------------------------------------------------------------------------------------------------------------------------------------------------------------------------------------------------------------------------------------------------------------------------------------------------------------------------------------------------------------------------------------------------------------------------------------------------------------------------------------------------------------------------------------------------------------------------------------------------------------------------------------------------------------------------------------------------------------------------------------------------------------------------------------------------------------------------------------------------------------------------------------------------------------------------------------------------------------------------------------------------------------------------------------------------------------------------------------------------------------------------------------------------------------------------------------------------------------------------------------------------------------------------------------------------------------------------------------------------------------------------------------------------------------------------------------------------------------------------------------------------------------------------------------------------------------------------------------------------------------------------------------------------------------------------------------------------------------------------------------------------|
| TP53 | 0,330 | transcription regulator Activated | 2,214 | 2,383 | 0,009 | 1,09E-32 | 1,50E-29 | <p>A2M,ABCC1,ABCG2,ACACB,ACAT1,ACO1,ACSF2,ACTL6A,ACTN1,ADGRB1,AFP,AHCV,AKAP12,AKR1B1,ALB,ALDH18A1,ALDOA,ALOX5,ANKH,ANXA1,ANXA2,ANXA3,ANXA4,APOA1,APOBEC2,APP,ARAP2,ARL6IP1,ARPC1B,ASNS,ASS1,ATF3,AURKA,BAG1,BAX,BCAP31,BCAS3,BHLHE40,BLHE41,BID,BIRC2,BMX,BTG2,C2,CA9,CALU,CAMK2N1,CAND1,CAP1,CAPNS1,CARHSP1,CASP1,CASP3,CASP4,CASP6,CASP8,CAT,CAV2,CCN2,CCN5,CCNA2,CCNB1,CCNB1IP1,CCNB2,CCNL1,CD44,CD47,CD59,CD70,CD81,CDC20,CD25B,CDC7,CDH3,CDK1,CDK4,CDK7,CDKN1B,CDKN3,CELL,CITED2,CKAP2,CKS2,CLU,COL18A1,COL1A1,COL1A2,COL3A1,COL4A1,COL4A2,COL5A2,COMT,COPB1,COQ2,COX6A2,CRYAB,CSHL1,CSK,CSNK1D,CSTB,CTF1,CTSD,CTS3,CYB5A,CYFIP2,CYP24A1,DBI,DCK,DD2,DDIT3,DDR1,DDX39A,DEK,DHCR24,DLGAP5,DNAJB5,DNAJC15,DNM1L,DNMT1,DPEP1,DPP4,DRAM1,DSTN,DTYMK,DUSP1,DUSP2,E2F4,EGF,EGR1,EGR3,EI24,EIF2B1,EIF4E2,EIF4G2,EIF4G3,EIF5,ENO3,EPHX1,ERF,ESPL1,ESR1,ESRRG,F11R,F3,FAS,FDXR,FERMT2,FGFBP1,FHL1,FHL2,FKBP1A,FKBP3,FKBP6,FN1,FOS,FOSL1,FOXO1,FOXP3,FSTL1,FUBP1,FUT1,FXRD3,FZD6,G0S2,G6PC,GADD45A,GADD45B,GADD45G,GAS6,GATA6,GATM,GBP1,GDPD5,GLB1,GLRX,GLUL,GML,GNAI1,GNL3,GPD1,GPI,GPR12,GPR162,GSK3A,GSTM5,GSTP1,GTF2H1,HADH,HBEGF,HIF1A,HLA-B,HMGB2,HMOX1,HRAS,HS3ST1,HYAL1,IFI16,IFI30,IFI35,IGFBP4,IL10RA,IL7,INKA2,INSR,IRF7,IRF8,IRF9,ISG15,ITGAV,JUNB,JUND,KCNNA4,KITLG,KLK3,KPNA2,KPNB1,LAMB2,LAMC1,LASP1,LBR,LDLR,LIPF,LMAN2,LPP,LRRC17,LRRC3,LYZ,MACROH2A1,MAD2L1,MAN2A1,MAP2K3,MAP4K2,MAPK1,MB,MCAM,MCM2,MCM3,MCM5,ME1,MELK,MET,MLF2,MMP1,MPZL2,MRPL15,MRPL18,MSH2,MSH6,MVP,MX1,MYBL2,MYH10,MYO6,MYOF,NAMPT,NAP1L4,NARS1,NCK2,NDC80,NDRG1,NDUFS6,NFKB1,NFKBIA,NKX2-5,NME1,NOS1,NOS2,NPTX1,NR0B2,NR2F1,NRP1,NTSR2,NUP153,OAS1,OAT,P2RX4,P4HA1,P4HB,PAK3,PARVA,PBK,PCK1,PCLAF,PCNA,PDE6A,PDHA1,PDHX,PDIA5,PDIA6,PDK2,PDLIM1,PDYN,PEA15,PECAM1,PERP,PFKFB1,PFKP,PFN1,PGD,PIGF,PIK3R3,PIM1,PKM,PLAAT4,PLK2,PLOD2,PLTP,PODXL,POLE2,POLR2E,POSTN,PPARA,PPARG,PPFIBP1,PPIC,PPM1D,PPP1CA,PPP1R15A,PPP1R17,PPT1,PRC1,PRKCA,PRKD1,PRL,PROM1,PRRX2,PSEN1,PSMA1,PSMB9,PSMD1,PSME3,PSTPIP2,PTEN,PTGDS,PTK2,PTPN12,PTPRO,PTPRU,PTTG1,PYCARD,RAB8A,RAC2,RAD50,RAN,RB1,RBBP7,RFC4,RGS16,RHOA,RHOB,RPN2,RPS19,RR</p> |
| OSM  |       | cytokine Activated                | 4,529 | 4,945 | 0,031 | 4,42E-29 | 4,52E-26 | <p>A2M,ABCA1,ABCC1,ABCC3,ABCC4,ABCC8,ABCG1,ACAA1,ACKR2,ADAMTS1,AFP,AHR,AKR1C1/AKR1C2,ALB,ALDH3B1,ANXA1,ANXA11,ANXA2,ANXA3,ARL4C,ASNS,ATF3,ATP13A3,ATP9A,B2M,BAIAP2,BHLHE40,BST1,C1R,C1S,CAP1,CASK,CASP4,CAT,CBX3,CCL20,CCT2,CDA,CDH3,CDKN1B,CDSN,CGA,CHI3L1,CISH,COL1A1,COL1A2,COL3A1,CSF3,CST6,CTSV,CXADR,CYP3A5,DENND5A,DHCR24,DHRS3,DHX9,DNAJC3,DNM1L,DSG3,ECM2,EGR1,EMP3,EPCAM,EXOSC10,F3,FLOT1,FN1,FOS,FOSB,FOSL1,GADD45G,GBP1,GBP2,GCA,GFPT1,GHRH,GJB5,GLUL,GRHPR,HBEGF,HIF1A,HLA-A,HLA-B,HLA-C,HLA-F,HMGN4,HMOX1,HSD11B2,HSF4,HSPA5,IFI35,IFNGR1,IL13,IL13RA1,IL15,IL18,IL32,IL6R,IL7,IRAK1,IRF7,IRF9,ITGA6,ITGA7,ITPKB,JUNB,KLK1,KLK7,KPNB1,KRT19,LCN2,LDLR,LPCAT3,LRRFIP1,LY6G6C,MARCKS,MGLL,MLLT1,MMP1,MPP2,MPZL2,MT1X,MX1,MYH10,NAMPT,NEDD4L,NELL2,NT2,NOS2,NRAS,NTSR2,OAS1,OLFM2A,OSMR,PAK2,PCNA,PDCC4,PEPD,PIGR,PLCB4,POLR2E,POLR2L,PPARG,PSMB8,PSMB9,PTEN,RAB4A,RARG,RBFOX2,RORA,RYK,SCNN1B,SERPINA3,SERPINB1,SERPING1,SLPI,SPP1,STAT1,STAT3,SULT2B1,TAP1,TAPBP,TERT,TIMP1,TLR2,TLR3,TNCC,TNFRSF11B,TNNC1,TP53,TPBG,TPM1,TRIM22,TSTA3,TUBA1A,TYRO3,UBE2L6,UBQLN2,UPK1A,USP46,VCAM1,</p>                                                                                                                                                                                                                                                                                                                                                                                                                                                                                                                                                                                                                                                                                                                                                                                                                                                                                                                                                                                                       |

IFNG

cytokine

Activated

5,744

6,292

0,032

4,92E-29

4,52E-26

A2M,ABCA1,ABCC1,ABI1,ACO1,ADA2,ADGRG1,ADIPOQ,ADM,AGRN,AHCY,AHR,ALDH1A3,ALDH1L1,ALDH7A1,ALOX12,ALOX5AP,ALPL,APOBEC3G,APP,ARAP2,ARC,ARFGAP3,ARL6IP5,ASNS,ASS1,ATF3,ATG5,AZGP1,B2M,BAX,BECN1,BID,BIRC2,BLNK,BST1,BTN3A2,C1QA,C1QB,C1R,C2,C3,CASP1,CASP10,CASP3,CASP4,CASP6,CASP7,CASP8,CAT,CCL1,CCL17,CCL20,CCL22,CCL25,CCN2,CCNA2,CCR4,CD163,CD44,CD63,CD74,CD83,CDK4,CDKN1B,CDX1,CDX2,CFB,CHAC1,CHRD,CHST8,CISH,CLIC5,COL1A1,COL1A2,COL5A2,CRABP1,CSE1L,CSF3,CSK,CTSD,CTSS,CTSV,CTSZ,CX3CR1,CXADR,CXCL6,CYB5A,CYBA,CYBB,CYP24A1,CYP3A4,DCT,DDB2,DDIT3,DDX58,DDX60,DEFB1,DHX9,DIO1,DMWD,DPP4,DUSP1,E2F4,EGF,EGR1,EGR3,ELAVL1,ELK1,ELN,EMID1,ENO1,ERAP1,ESM1,ETV7,F11R,F2RL1,F3,FAAH,FANCF,FAS,FBP1,FCER1G,FGF1,FGL2,FHL2,FKBP1A,FKBP6,FN1,FOS,FOSB,FOXO1,FOXP3,FURIN,FZD1,GAD1,GAS6,GBP1,GBP2,GCH1,GCK,GLA,GLUL,GNAS,GN G7,GNL1,GPR12,GSTP1,HAAS,HBEGF,HCP5,HERC6,HIF1A,HLA-A,HLA-B,HLA-C,HLA-DMA,HLA-DMB,HLA-DQB1,HLA-DRA,HLA-DRB1,HLA-E,HLA-F,HLA-G,HMOX1,HSD17B4,HSPA5,HTRA1,IDH3B,IDI1,IER2,IFI16,IFI30,IFI35,IFI44,IFIH1,IFIT2,IFIT3,IFIT5,IFITM1,IFITM2,IFNGR1,IFNGR2,IGFBP4,IL10RA,IL13,IL15,IL17RB,IL18,IL25,IL32,IL6R,IL7,INS,INSR,IRAK1,IRF7,IRF8,IRF9,ISG15,ITGA6,ITGAV,ITGB2,ITGB3,ITPKB,JUNB,JUND,KITLG,KRAS,KRT19,KYAT1,KYNU,LAMB2,LAMC1,LCN2,LEP,LGALS3BP,LPL,LTA,LTB,LY96,LYN,MAFF,MAN2A1,MARCKSL1,METAP2,MITF,MMP1,MRAS,MSH2,MST1R,MUC1,MX1,MYH10,MYOD1,MYOG,NAMPT,NBN,NCALD,NCF2,NCR3,NFKB1,NFKBIA,NGF,NMI,NOS1,NOS2,OAS1,ODC1,OPN3,PAM,PANX1,PAPPA,PBK,PCK1,PDCC1,PEA15,PECAM1,PIGR,PIM1,PKM,PLAAT4,PLSCR1,PMEL,PPARA,PPARG,PRKCA,PRKCD,PRL,PSMA4,PSMA6,PSMB10,PSMB8,PSMB9,PSME1,PSME3,PTGES2,PTPRB,RAB27A,RAB38,RAC2,RACK1,RARRES1,RB1,RBP7,RFXANK,RHOB,RORC,RTP4,S100A10,SCNN1B,SEC11A,SEC61A1,SEMA4A,SEMA7A,SERPING1,SGPL1,SHARPN,SLC12A2,SLC1A2,SLC28A1,SLC2A4,SLC37A4,SLPI,SMA D1,SMAGP,SOAT1,SOCS2,SOD2,SP110,SPP1,SQSTM1,SRP54,SSBP1,ST13,STAT1,STAT3,TACR2,TAP1,TAPBP,TBX21,TCIRG1,TERT,TGFBR3,TGM1,TIMP1,TLR1,TLR2,TLR3,TLR6,TMEM50B,TNFRSF11B,TNFSF10,TP53,TP73,TRIM21,TRIM22,TSC22D3,TYROBP,UBD,UBE2D1,UBE2E1,UBE2L6,VCAM1,VDR,VEGFA,VLDR,WARS1,ZFP36,ZNF638

| MYC | 0,404 | transcription regulator | -0,428 | -0,004 | 0,028 | 1,08E-28 | 8,93E-26 | ABCA1,ABCC1,ABCC3,ABCC4,ABCE1,ABCG4,ACACA,ACAT1,ACTN1,ADAMTS1,ADIPOR1,ADM,AFP,AHCY,AIMP2,AKAP12,ALB,ALDH18A1,ALDOA,ALOX5,ANKRD17,ANXA4,ANXA5,APOC3,APP,ARL6IP1,ASNS,ASS1,ATOH1,AXIN1,BAG1,BAX,BIRC2,BZW2,C12orf49,CAMK2N1,CANX,CAPN2,CAPNS1,CASP1,CASP10,CASP3,CASP8,CAST,CCNA2,CCNB1,CCNB2,CCT3,CD151,CD44,CD47,CD48,CDC20,CDC25B,CDK1,CDK4,CDK7,CDKN1B,CDX2,CEBPE,CIDEA,CKS2,CLPB,CLU,COL15A1,COL1A1,COL1A2,COL3A1,COL4A1,COL4A2,COL5A2,COL6A3,CPD,CRABP2,CRYAB,CSE1L,CSRP2,CST6,CSTB,CTNNA1,CTSD,CTSV,CUL1,CYFIP2,CYP26A1,DBI,DBN1,DCTPP1,DDB2,DDIT3,DEK,DLEU1,DNMT1,DNPH1,DROSHA,DUSP1,DUSP2,EED,EGR1,EIF2B1,EIF3D,EIF4G1,ELAVL1,ENO1,EPCAM,EPHB3,ERAP1,EVX1,EXOSC8,EXT2,F3,FABP1,FABP2,FARP1,FAS,FBN1,FCGRT,FGF5,FN1,FOS,FOSL1,FOXF1,FSTL1,G6PC,GADD45A,GADD45B,GADD45G,GATA6,GBP2,GCK,GFPT1,GLUD1,GLUL,GM2A,GPC3,GPI,GRPEL1,HAND1,HIF1A,HLA-A,HLA-B,HLA-E,HMOX1,HNRNPAB,HRAS,HSD11B2,HSPA14,IFI16,IFI35,IFI44,IFIH1,IFIT2,IFIT3,IFIT5,IL17RB,INS,IRF7,IRF9,ITGA6,KAT2A,KLK1,KLK14,KLK6,KRAS,LAMB2,LAMP1,LEP,LGALS1,LUM,LXN,LYZ,MAD2L1,MAN2A1,MCM5,METAP2,MFAP1,MGST3,MITF,MMP7,MSH2,MSN,MX1,MYBPH,NARS1,NBN,NDRG1,NFE2L2,NFKBIA,NGF,NIBAN1,NME1,NMI,NOCT,NPPA,NRP1,OAS1,OAT,ODC1,OVOL1,PAM,PARP1,PCK1,PDCNA,PDCD4,PDHA1,PECAM1,PERP,PEX19,PFKFB1,PFKP,PHF21A,PKLR,PKM,PLA1A,PLS3,PLSCR1,POLR2G,PPARA,PPID,PPL,PRDX4,PRKACB,PROM1,PRPH,PSMB8,PTEN,PTPRC,PYCR1,RARG,RARRES1,RARS1,RB1,RBBP7,RBP1,RHOA,RHOB,RIOX2,ROCK1,RPS19,RRM2,RUVBL1,S100A10,S100A6,SAE1,SARDH,SDCBP,SEMA4A,SERINC3,SERPINE2,SFXN1,SGK1,SIRT2,SLC16A7,SLC22A4,SMAD1,SNRPD1,SOD2,SPP1,SPRR3,SQOR,ST3GAL4,STAT1,STAT3,STMN1,TERT,TES,TGM1,THBS2,TIMP1,TKT,TLE1,TMSB10/TMSB4X,TNC,TNFSF10,TOB1,TP53,TP53I3,TP73,TPP2,TRIM5,TRIP12,TSPAN7,TSPO,TXNRD1,TYMS,UBE2C,UBE2I,VEGFA,VEGFA,VIM,VLDLR,WNT7B,WNT8B,XPO1,YAP1,YRDC,YTHDC1,ZFP36 |
|-----|-------|-------------------------|--------|--------|-------|----------|----------|----------------------------------------------------------------------------------------------------------------------------------------------------------------------------------------------------------------------------------------------------------------------------------------------------------------------------------------------------------------------------------------------------------------------------------------------------------------------------------------------------------------------------------------------------------------------------------------------------------------------------------------------------------------------------------------------------------------------------------------------------------------------------------------------------------------------------------------------------------------------------------------------------------------------------------------------------------------------------------------------------------------------------------------------------------------------------------------------------------------------------------------------------------------------------------------------------------------------------------------------------------------------------------------------------------------------------------------------------------------------------------------------------------------------------------------------------------------------------------------------------------------------------------------------------------------------------------------------------------------------------------------------------------------------------------------------------------------------------------------------------------------------------------------------------------|
|-----|-------|-------------------------|--------|--------|-------|----------|----------|----------------------------------------------------------------------------------------------------------------------------------------------------------------------------------------------------------------------------------------------------------------------------------------------------------------------------------------------------------------------------------------------------------------------------------------------------------------------------------------------------------------------------------------------------------------------------------------------------------------------------------------------------------------------------------------------------------------------------------------------------------------------------------------------------------------------------------------------------------------------------------------------------------------------------------------------------------------------------------------------------------------------------------------------------------------------------------------------------------------------------------------------------------------------------------------------------------------------------------------------------------------------------------------------------------------------------------------------------------------------------------------------------------------------------------------------------------------------------------------------------------------------------------------------------------------------------------------------------------------------------------------------------------------------------------------------------------------------------------------------------------------------------------------------------------|

| TNF | -0,089 | cytokine | Activated | 3,672 | 4,204 | 0,028 | 7,04E-28 | 5,28E-25 | A2M,AATK,ABCA1,ABCC1,ABCC3,ABCG2,ABTB2,ACACA,ACKR2,ACKR3,ADIPOQ,ADM,AIMP1,AKAP12,AKR1B1,ALAD,ALB,ALDH1A3,ALDH2,ALDH3A1,ALOX15B,ALOX5,ALOX5AP,ANKRD55,ANPEP,ANXA1,ANXA11,APOA1,APOBEC3B,APP,AQP5,ARC,ARF4,ARHGDI,ARHGFE17,ARL6IP5,ASS1,ATF3,AURKC,AVP,AXIN1,B2M,BAX,BCKDHA,BHLHE40,BHLHE41,BID,BIRC2,BLVRA,BTG2,BTN3A3,C3,CA2,CASP1,CASP10,CASP3,CASP4,CASP6,CASP7,CASP8,CAT,CAVIN3,CCL1,CCL17,CCL20,CCL22,CCN2,CCN5,CCR4,CD163,CD1A,CD1B,CD44,CD47,CD5,CD59,CD70,CD83,CDH3,CDK4,CDX1,CERT1,CFB,CFD,CHI3L1,CHRND,CIDEC,CISH,CITE2,CLDN11,CLTCL1,CLU,CNR2,COL15A1,COL1A1,COL1A2,COL3A1,CRYAB,CSF3,CTLA4,CTSF,CTSS,CTSZ,CX3CR1,CXCL6,CYBA,CYBB,CYP27B1,CYP2C8,CYP7B1,DBI,DCSTAMP,DDIT3,DDX58,DENND2D,DHRS3,DIO1,DLEU1,DMBT1,DNMT1,DPP4,DPYS,DUSP1,DUSP2,EGR1,EGR3,ELAVL1,ELK1,ELK3,EPCAM,ESM1,ESR1,EXT1,F11R,F2RL1,F3,FABP1,FADD,FAS,FCER1G,FCGRT,FGF5,FN1,FOS,FOSB,FOXL1,FOXC2,FOXF1,FOXO1,FOXO4,FOXP3,FUT4,FUT7,FZD5,G0S2,GABRA2,GADD45A,GADD45B,GADD45G,GAST,GBP1,GBP2,GCH1,GHR,GM2A,GNAI1,GNAI3,GNL1,GPD1,GRN,GSTA1,GSTP1,HAND1,HBEGF,HDAC1,HERC1,HEXA,HEXB,HIF1A,HLA-A,HLA-B,HLA-DRA,HLA-E,HLA-F,HLA-J,HMGN3,HMOX1,HNF4A,HPGD,HPRT1,HSD3B2,HSP90B1,HSPA4,HSPA5,IER2,IFI16,IFIH1,IFIT3,IFIT5,IFITM1,IFNAR2,IFNGR1,IFNGR2,IGFBP4,IL10RA,IL13,IL15,IL17RB,IL18,IL25,IL32,IL36A,IL7,INHA,INS,INSR,IRF7,IRF8,ISG15,ITGA10,ITGA6,ITGAV,ITGB2,ITGB3,ITGB6,ITGB8,JAK1,JUNB,JUND,KIF20A,KITLG,KLK3,KYNU,LAMC1,LCN2,LDLR,LEP,LPL,LTB,LTBP2,LXN,LY96,LYN,MAEA,MAFF,MAP2K3,MAP4K4,MAPK1,MARCKSL1,MC1R,MCAM,MCM3,MET,MFHAS1,MITF,MMMD,MMP1,MMP7,MPC1,MSH2,MST1R,MUC1,MVP,MX1,MYH10,MYL6,MYOD1,MYOG,NAMPT,NCF2,NCK1,NET1,NFE2L2,NFKB1,NFKBIA,NFKBIE,NGF,NME1,NNMT,NOCT,NOS1,NOS2,NOTCH4,NPHS1,NPPA,NR0B2,NR4A1,NR4A3,NRP1,NUCB2,OAS1,ODC1,OLFML2A,OSBPL10,OSMR,P4HB,PAK2,PAPPA,PARP1,PCBP2,PCK1,PCK2,PCNA,PDCD1,PDIA4,PDZD2,PECAM1,PER2,PIGR,PIM1,PKM,PLA1A,PLA2G3,PLA2G4C,PLAAT4,PLAGL2,PLK2,PLK3,PLOD2,PLSCR1,POSTN,PPARA,PPARG,PPIF,PPP1R15A,PPP1R3C,PRKCA,PRKCD,PRL,PSEN1,PSMB10,PSMB8,PSMB9,PSME1,PTE,N,PTPN12,PTPRC,PYCARD,RAB32,RAC1,RB1,RBP1,RBPMS,RGS16,RGS2,RGS7,RHOA,RHOB,RORA,RRM1,RRM2,RXRA,SCNN1B,SEC61A1,SERPINA3,SERPIN1,SERPINE |
|-----|--------|----------|-----------|-------|-------|-------|----------|----------|--------------------------------------------------------------------------------------------------------------------------------------------------------------------------------------------------------------------------------------------------------------------------------------------------------------------------------------------------------------------------------------------------------------------------------------------------------------------------------------------------------------------------------------------------------------------------------------------------------------------------------------------------------------------------------------------------------------------------------------------------------------------------------------------------------------------------------------------------------------------------------------------------------------------------------------------------------------------------------------------------------------------------------------------------------------------------------------------------------------------------------------------------------------------------------------------------------------------------------------------------------------------------------------------------------------------------------------------------------------------------------------------------------------------------------------------------------------------------------------------------------------------------------------------------------------------------------------------------------------------------------------------------------------------------------------------------------------------------------------------------------------------------------------------------------------------------------------------------------------------------------------------------------------------------------------------------------------------------------------------------------------------------------------------------------------------------------------------------------------------------------------|
|-----|--------|----------|-----------|-------|-------|-------|----------|----------|--------------------------------------------------------------------------------------------------------------------------------------------------------------------------------------------------------------------------------------------------------------------------------------------------------------------------------------------------------------------------------------------------------------------------------------------------------------------------------------------------------------------------------------------------------------------------------------------------------------------------------------------------------------------------------------------------------------------------------------------------------------------------------------------------------------------------------------------------------------------------------------------------------------------------------------------------------------------------------------------------------------------------------------------------------------------------------------------------------------------------------------------------------------------------------------------------------------------------------------------------------------------------------------------------------------------------------------------------------------------------------------------------------------------------------------------------------------------------------------------------------------------------------------------------------------------------------------------------------------------------------------------------------------------------------------------------------------------------------------------------------------------------------------------------------------------------------------------------------------------------------------------------------------------------------------------------------------------------------------------------------------------------------------------------------------------------------------------------------------------------------------|

|      |        |                                   |           |        |        |       |          |          |                                                                                                                                                                                                                                                                                                                                                                                                                                                                                                                                                                                                                                                                                                                                                                                                                                                                                                                                                                                                                                                                                                                                                                                                                                                                                                                                                                                                                                                                                                                                                                                                                                                                                                                                                                                                                                                                                                                                                                                                                                                                                                                                                                                                                                                                                                                                                                                                                                                                                                                                                                                                                                                                                                                                                                                                                                                                                                                                                                                                                                                                                              |
|------|--------|-----------------------------------|-----------|--------|--------|-------|----------|----------|----------------------------------------------------------------------------------------------------------------------------------------------------------------------------------------------------------------------------------------------------------------------------------------------------------------------------------------------------------------------------------------------------------------------------------------------------------------------------------------------------------------------------------------------------------------------------------------------------------------------------------------------------------------------------------------------------------------------------------------------------------------------------------------------------------------------------------------------------------------------------------------------------------------------------------------------------------------------------------------------------------------------------------------------------------------------------------------------------------------------------------------------------------------------------------------------------------------------------------------------------------------------------------------------------------------------------------------------------------------------------------------------------------------------------------------------------------------------------------------------------------------------------------------------------------------------------------------------------------------------------------------------------------------------------------------------------------------------------------------------------------------------------------------------------------------------------------------------------------------------------------------------------------------------------------------------------------------------------------------------------------------------------------------------------------------------------------------------------------------------------------------------------------------------------------------------------------------------------------------------------------------------------------------------------------------------------------------------------------------------------------------------------------------------------------------------------------------------------------------------------------------------------------------------------------------------------------------------------------------------------------------------------------------------------------------------------------------------------------------------------------------------------------------------------------------------------------------------------------------------------------------------------------------------------------------------------------------------------------------------------------------------------------------------------------------------------------------------|
| ESR1 | -0,196 | ligand-dependent nuclear receptor | Activated | 2,724  | 2,907  | 0,012 | 3,70E-25 | 2,35E-22 | <p>AASS,ABCC3,ABCG2,ABLM1,ACKR3,ACTR2,ADCY1,AKA P13,ALOX5,ANGPTL2,ANXA3,ANXA4,AP2B1,AP2S1,APOA 1,ARFIP2,ASS1,ATF3,AURKA,AVP,BAG1,BAX,BCAS3,BCL AF1,BECN1,BUB3,C3,CA2,CAP2,CAPN2,CASP10,CASP6,C ASP8AP2,CASQ2,CAV2,CCL20,CCN5,CCNA2,CCNB1,CCN C,CD59,CD83,CDK1,CDK4,CDKN1B,CDKN1C,CDKN3,CEN PM,CENPU,CGA,CHMP4A,CHRM2,CIT,CLCN3,CLDN1,CLN 3,CLTCL1,COBL,COL5A2,COMT,CRABP2,CRK,CSAD,CSN K1A1,CTSD,CTSS,CXADR,CYFIP1,CYFIP2,CYP4A11,CYP7 B1,DDB2,DLG5,DMTN,DR1,DSG2,DYNC1L2,DYRK2,EGF,E GR1,ENAH,ENO1,ERGIC2,ESR1,ESRRA,F12,F2RL1,F3,FA BP1,FADD,FAM102A,FAS,FHL1,FIBP,FOS,FOSB,FOSL1,FO XO1,FOXO4,FOXP3,FRAT2,GADD45B,GALNT7,GHR,GLB1, GLRX,GM2A,GNAS,GNB1,GNG12,GUCY1A1,GUCY1B1,GU LP1,HACD1,HAX1,HBEGF,HCP5,HIF1A,HIP1R,HLA-B,HLA- C,HLA-E,HLA-G,HLA- J,HOMER3,HPX,HSD17B4,HSD3B2,HSP90B1,HTRA1,HYAL 1,IFI44,IFITM1,IFITM2,IFRD1,IGFBP4,IMPDH2,INSR,IQGAP1 ,ITGA10,ITGA6,ITGB1BP1,IVL,JAK1,JUNB,JUND,KCNE2,KI F20A,KLHL20,KLK3,KLK5,KPNB1,KRAS,KRT19,LAMB1,LA MB2,LAPTM5,LCN2,LDLR,LEP,LEPR,LGALS1,LGALS3BP,L HB,LIPC,LPL,LTB,LTBP4,LTF,LYPD1,M6PR,MAD2L1,MAP3 K1,MAP3K12,MAPK1,MAPK8,MAPT,MARCKS,MAST2,MC1 R,MMD,MME,MMP1,MPC1,MST1R,MX1,MYH10,MYO6,NCF 2,NDC1,NELL2,NFKB1,NFKBIA,NFKBIE,NLGN1,NME1,NOS 2,NROB2,NRCAM,NUP153,NUP210,PAK2,PBK,PCNA,PCNT ,PDCD2,PDCD4,PDCD5,PDK4,PGLS,PIBF1,PLA2G4C,PLC E1,PLOD2,PLS1,PLXNA2,PPP1R12A,PPP1R3C,PPP6R2,P RKACB,PRKCD,PRKX,PRL,PROM1,PROS1,PSIP1,PTCH2, PTEN,PTGER3,PTK2,PTP4A2,PTPRT,PTTG1,PTTG1IP,PY CR1,RAB27A,RAI2,RB1,RBM22,RDH16,RGS16,RHOQ,RIT1 ,ROCK1,RORC,RRBP1,RTP4,SCARB2,SCNN1B,SEMA3B,S GK1,SLC10A1,SLC13A4,SLC25A36,SLC26A2,SLC2A4,SLC 6A4,SLC9A5,SMAD2,SMC4,SNAI1,SNAP23,SNN,SOCS2,S OX4,SP110,SPINT1,SPP1,SPRY4,SPTLC2,SQSTM1,SRPK 2,STAT1,STAT3,STAT5A,STC2,STEAP1,STX3,SYNPO,TAC C1,TAPBP,TCIRG1,TEAD4,TERT,TESK1,TFF2,THBS4,THR B,TIMM17B,TMED10,TMPO,TNFRSF11B,TNFSF10,TNPO1, TOB1,TP53,TP53BP1,TP53I3,TPD52L1,TPM1,TPP2,TRAM1 ,TRPM2,TSC22D3,TSKU,TSPO,TSPYL2,TYK2,UBE2I,USP8, VEGFA,VEZF1,VIM,VPS35,VRK2,WARS1,WEE1,WNT11,W RAP73,YARS1,YIPF3,ZBTB7B,ZNF544</p> <p>ABCA1,ABCC4,ACTR3,AGRN,AHR,AIMP2,ALDOA,ALDOC, AMPH,ANPEP,AQP5,ATF3,ATG5,B2M,BAG1,BZW2,CASP1, CASP3,CAVIN2,CBX5,CCN2,CCNA2,CCNB1,CCT5,CD44,C D74,CDH3,CDKN1B,CHI3L1,CLIC5,CLU,COL1A1,COL3A1,C OL4A1,CRYAB,CSE1L,CSF3,CXADR,CXCL6,DBN1,DDIT3, DNMT1,DPYSL2,DUSP1,E2F4,EGR1,EI24,EIF5,ELK1,ELN,E NO1,EPCAM,EPM2A,F2RL1,F3,FAS,FBN1,FLII,FN1,FOS,FO SB,FOSL1,FOXP3,FSTL1,FXVD3,GADD45A,GCNT3,GFPT1, GLI1,GLUL,GPC3,GRN,GSTA3,GTTF2,HBEGF,HEXA,HIF1A, HLA- DRB1,HMOX1,HOPX,HSPA5,IFITM1,IFITM2,IRF9,ISG15,ITG B3,JUNB,KCNN4,KPNB1,KRAS,LAMB1,LAMP1,LCN2,LTBP 4,LYZ,MAN2A1,MAPK8,MCAM,MET,MMD,MMP7,MSN,MUC 6,MX1,MYBL2,NETO2,NFE2L2,NFKB1,NFKBIA,NOS2,NR4A 1,NRAS,NSF,NXN,OAS1,ODC1,P3H3,PARVA,PDIA2,PDIA3, PECAM1,PIM1,PKM,PLA1A,PPARG,PPFIBP1,PPP1CA,PRC 1,PRDX4,PRKCD,PRPH,PSEN1,PTEN,PTK2,PTTG1,PYGM, QTRT2,RAB27A,RAI14,RBBP7,RBM7,RCL1,RHOA,RHOB,R HOC,ROCK1,S100A4,S100A6,SEMA7A,SERPINA3,SERPIN E2,SLC34A2,SLC7A10,SNAI1,SOAT1,SPP1,SPRY2,SQSTM 1,ST5,STAT1,STAT3,STAT5A,TAP1,TBX21,TESC,TNC,TNF RSF11B,TP53,TRMT2A,UBE2I,VCAN,VEGFA,VIM,VPS35,W</p> |
| KRAS | 0,279  | enzyme                            |           | -0,394 | -0,392 | 0,000 | 5,82E-25 | 3,43E-22 | <p>ABCA1,ABCC4,ACTR3,AGRN,AHR,AIMP2,ALDOA,ALDOC, AMPH,ANPEP,AQP5,ATF3,ATG5,B2M,BAG1,BZW2,CASP1, CASP3,CAVIN2,CBX5,CCN2,CCNA2,CCNB1,CCT5,CD44,C D74,CDH3,CDKN1B,CHI3L1,CLIC5,CLU,COL1A1,COL3A1,C OL4A1,CRYAB,CSE1L,CSF3,CXADR,CXCL6,DBN1,DDIT3, DNMT1,DPYSL2,DUSP1,E2F4,EGR1,EI24,EIF5,ELK1,ELN,E NO1,EPCAM,EPM2A,F2RL1,F3,FAS,FBN1,FLII,FN1,FOS,FO SB,FOSL1,FOXP3,FSTL1,FXVD3,GADD45A,GCNT3,GFPT1, GLI1,GLUL,GPC3,GRN,GSTA3,GTTF2,HBEGF,HEXA,HIF1A, HLA- DRB1,HMOX1,HOPX,HSPA5,IFITM1,IFITM2,IRF9,ISG15,ITG B3,JUNB,KCNN4,KPNB1,KRAS,LAMB1,LAMP1,LCN2,LTBP 4,LYZ,MAN2A1,MAPK8,MCAM,MET,MMD,MMP7,MSN,MUC 6,MX1,MYBL2,NETO2,NFE2L2,NFKB1,NFKBIA,NOS2,NR4A 1,NRAS,NSF,NXN,OAS1,ODC1,P3H3,PARVA,PDIA2,PDIA3, PECAM1,PIM1,PKM,PLA1A,PPARG,PPFIBP1,PPP1CA,PRC 1,PRDX4,PRKCD,PRPH,PSEN1,PTEN,PTK2,PTTG1,PYGM, QTRT2,RAB27A,RAI14,RBBP7,RBM7,RCL1,RHOA,RHOB,R HOC,ROCK1,S100A4,S100A6,SEMA7A,SERPINA3,SERPIN E2,SLC34A2,SLC7A10,SNAI1,SOAT1,SPP1,SPRY2,SQSTM 1,ST5,STAT1,STAT3,STAT5A,TAP1,TBX21,TESC,TNC,TNF RSF11B,TP53,TRMT2A,UBE2I,VCAN,VEGFA,VIM,VPS35,W</p>                                                                                                                                                                                                                                                                                                                                                                                                                                                                                                                                                                                                                                                                                                                                                                                                                                                                                                                                                                                                                                                                                                                                                                                                                                                                                                                                                                                                                                                                                                                                                                                                                                                                                                                                                                                                                                                                                                                                                                                                                                    |

|       |        |                                   |        |        |       |          |          |                                                                                                                                                                                                                                                                                                                                                                                                                                                                                                                                                                                                                                                                                                                                                                                                                                                                                                                                                                                                                                                                                                                                                                                                                                                  |
|-------|--------|-----------------------------------|--------|--------|-------|----------|----------|--------------------------------------------------------------------------------------------------------------------------------------------------------------------------------------------------------------------------------------------------------------------------------------------------------------------------------------------------------------------------------------------------------------------------------------------------------------------------------------------------------------------------------------------------------------------------------------------------------------------------------------------------------------------------------------------------------------------------------------------------------------------------------------------------------------------------------------------------------------------------------------------------------------------------------------------------------------------------------------------------------------------------------------------------------------------------------------------------------------------------------------------------------------------------------------------------------------------------------------------------|
| IL6   | -0,273 | cytokine                          | 1,198  | 1,722  | 0,042 | 4,81E-23 | 2,48E-20 | A2M,ABCA1,ABCC1,ABCC3,ABCG2,ACKR2,ADAMTS1,ADGRB1,ADM,AFP,AHR,ALAS1,ALB,ANPEP,ANXA1,APOA1,APOB,APP,ARL4C,ATF3,AVP,AXIN1,BAX,BTG2,BUB3,C1QL1,C3,CAPRIN1,CASP1,CASP3,CASP4,CASP7,CCL20,CCN2,CCNA2,CCNB1,CCNB2,CCR4,CD163,CD44,CD48,CD53,CD74,CD83,CDCC20,CDK1,CDKN1B,CDKN3,CDX2,CFD,CHRN4,CISH,CLU,COL1A1,COL3A1,CRYAB,CX3CR1,CXCL6,CYBB,CYP2B6,CYP2C8,CYP3A4,CYP3A5,DIO1,DLX5,DNMT1,DUSP1,E2F4,EGR1,F12,F3,FAS,FCGRT,FN1,FOS,FOSL1,FOXO3,G6PC,GADD45A,GADD45B,GADD45G,GBP2,GCH1,GHRH,GINS1,GLI1,GLRX,GSTA1,HIF1A,HLA-A,HLA-DMA,HMOX1,HOMER3,HPGD,HPX,HSPA5,IFI16,IFIT2,IGFBP4,IK,IL13,IL15,IL25,IL6R,IL7,IRF9,ITGAV,ITGB3,JAK1,JUNB,JUND,KLK3,LCN2,LDLR,LEFTY2,LEP,LGALS1,LPL,LTF,LY96,LYZ,MACROD1,MAD2L1,MCM3,MET,MIA2,MMD,MMP1,MMP7,MRAS,MUC1,MYBL2,MYO1,NAMPT,NCF2,NEU3,NFKB1,NFKBIA,NGF,NOS2,NRAS,NUCB2,PCLAF,PCNA,PCD1,PECAM1,PIM1,PLA2G2D,PLG,PLK2,PPARG,PPP1R15A,PROM1,PRPH,PSMB10,PSMB8,PSMB9,PSME1,PTPRC,PTTG1,RAB27A,RASA1,RB1,REG1A,RNASE6,RORA,RORC,RRM2,SEMA4A,SEMA6D,SENP2,SERPINA3,SGK1,SH3GLB1,SLC10A1,SLC12A2,SLC2A4,SLC7A7,SNAI1,SNX10,SOC2,SOD2,SP110,SPP1,SST,STAP2,STAT1,STAT3,TAF9,TAP1,TBX21,TERT,TIMP1,TLR1,TLR2,TLR3,TLR6,TNC,TNFRSF11B,TNFSF10,TNS4,TP53,TYK2,UBE2C,VCAM1,VEGFA,VIM,VLDLR,VTGN1,WARS1,WEE1,XPNPEP2,XRCC5 |
| NR3C1 | 0,075  | ligand-dependent nuclear receptor | -1,911 | -1,839 | 0,009 | 3,55E-22 | 1,73E-19 | A2M,AATK,ABCA1,ABI1,ABL1,ACAT1,ACTN1,ADM,ALOX5AP,ANXA1,APP,AQP5,ARPC2,AVP,B2M,BAG1,BAG2,BAX,BCKDHA,BHLHE40,BIRC2,BNIP3L,C1R,CAPN2,CASP10,CASP4,CASP6,CASP7,CAT,CAVIN2,CD47,CD70,CD83,CDKN1C,CGA,CIDEA,CKAP2,COMT,CORO1C,CRABP2,CRYAB,CUL1,CYP11B2,CYP2A6 (includes others),CYP2C8,CYP3A4,CYP3A5,CYP3A7,DAD1,DAPK2,DBI,DNAJC15,DPF2,DUSP1,DUSP22,DYNLL1,EGR1,ETNK2,F2RL1,F3,FADD,FASTKD1,FCER1G,FN1,FNTA,FOS,FOXO1,G6PC,GADD45A,GADD45B,GBP2,GLUL,GNMT,GPR65,GRAB3,GSTA1,GSTP1,GULP1,GZMA,HDAC1,HSD11B2,HSPA6,IER2,IFIH1,IFIT2,IFT122,IGFALS,IL13,IL15,IL18,INSR,IRF8,ISG15,ITGAV,ITGB2,ITGB6,JUND,KLF9,KLK3,LEP,LHB,LIP,LTB,MAEA,MALT1,MAPK1,MAT1A,MEST,MMP1,MYOC,NAMPT,NFIL3,NFKB1,NFKBIA,NHLH1,NME5,NOS2,NOTCH4,NPPA,NR0B2,NSMAF,NTF3,OAT,PAK2,PCK1,PDCD4,PEA15,PER1,PIGR,PIK3R3,PLK2,PPARA,PPARG,PPP1R15A,PRKACB,PRKAR1B,PRKCD,PRL,PRPH,PSEN1,PSMA6,PSMG2,PTEN,PTP4A2,PTRH2,RAB11A,RABGGTB,RB1,RGS2,RHOB,ROCK1,RRAGC,SERPINA6,SGK1,SGPL1,SH3GLB1,SLC10A2,SLC19A2,SLC1A6,SLC1A7,SLC2A5,SLC43A1,SMAD1,SOX4,SPP1,SRD5A2,STAT3,STAT5A,STK39,STUB1,SYT2,THAP1,TIPARP,TLR1,TLR2,TM2D3,TNFAIP8,TNFRSF11B,TNS4,TP53,TP53BP2,TP53I3,TSC22D3,UBE2K,UGCG,VCAM1,VDR,WDR3,YWHAH,YWHAH                                                                      |

|       |        |          |           |        |        |       |          |          |                                                                                                                                                                                                                                                                                                                                                                                                                                                                                                                                                                                                                                                                                                                                                                                                                                                                                                                                                                                                                                                                                                                                                                                                                                                                                                                                                                                               |
|-------|--------|----------|-----------|--------|--------|-------|----------|----------|-----------------------------------------------------------------------------------------------------------------------------------------------------------------------------------------------------------------------------------------------------------------------------------------------------------------------------------------------------------------------------------------------------------------------------------------------------------------------------------------------------------------------------------------------------------------------------------------------------------------------------------------------------------------------------------------------------------------------------------------------------------------------------------------------------------------------------------------------------------------------------------------------------------------------------------------------------------------------------------------------------------------------------------------------------------------------------------------------------------------------------------------------------------------------------------------------------------------------------------------------------------------------------------------------------------------------------------------------------------------------------------------------|
| IL1B  | -0,096 | cytokine |           | 1,385  | 1,820  | 0,031 | 5,14E-22 | 2,36E-19 | A2M,ABCC3,ABCG2,ACKR2,ADAMTS1,ADM,AKR1B1,ALDH7A1,ALPL,ANKH,ANXA1,APOB,APP,ARC,ARL6IP5,ASIC3,ASS1,ATF3,AVP,B2M,BAX,BIRC2,BTG2,C1R,C3,CASP10,CASP3,CASP4,CAT,CCL1,CCL17,CCL20,CCL22,CCN2,CD44,CD74,CD83,CDX1,CFB,CHI3L1,CISH,CNR2,COL1A1,CRYAB,CSF3,CTSF,CTSS,CTSZ,CX3CR1,CXCL6,CYBA,CYBB,CYP11B2,CYP27B1,CYP2B6,CYP3A4,CYP3A5,DBI,DDIT3,DI O1,DNMT1,DPP4,DPY19L4,DR1,DUSP1,EGR1,ELAVL1,ELN,ESR1,ESRRA,F2RL1,F3,FABP1,FAS,FN1,FOS,FOSB,FOXO1,FOXO1,FURIN,FUT7,GOS2,GAD1,GADD45A,GADD45B,GAS6,GAST,GBP1,GBP2,GCH1,GCK,GHR,GLA,GM2A,GNAS,GNL1,GRN,GSTA1,HBEGF,HDAC1,HEXA,HEXB,HIF1A,HLA-A,HLA-DRA,HLA-E,HMOX1,HNF1B,HNF4A,HPRT1,HSPA5,IER2,IFI16,IFIT3,IFNGR1,IFRD1,IGFALS,IGFBP4,IL10RA,IL15,IL18,IL25,IL32,IL36A,IL6R,IL7,INS,INSR,IRAK1,IRF7,ISG15,ITGAV,ITGB3,ITGB8,ITPKB,JUNB,JUND,KRT19,LCN2,LDLR,LEP,LHB,LTA,LY96,MAPT,MARCKSL1,MMP1,MMP7,MUC1,MUC5B,MX1,MYOD1,MYOG,NAMPT,NFE2L2,NFIL3,NFKB1,NFKBIA,NGF,NIBAN1,NMI,NOCT,NOS1,NOS2,NPPA,NROB2,NR4A1,NR4A3,NRP1,ODC1,OSMR,P4HB,PAPPA,PCNA,PDCD1,PFKP,PIGR,PIM1,PLA2G3,PLK3,PLSCR1,POSTN,PPARA,PPARG,PRKCD,PSEN1,PSMB10,PSMB8,PSMB9,PTGDS,RAC2,RAN,RGS16,RHOB,RORA,RORC,RXRA,S100A10,S100A6,SCNN1B,SEC61A1,SERPINA3,SGPL1,SIRT3,SLC10A1,SLC10A2,SLC1A2,SLC22A4,SLC2A4,SLC37A4,SLC6A4,SOCS2,SOD2,SPP1,SSTR2,STAT1,STAT3,STAT5A,TBP,TBX21,TFPI2,TGM1,TIMP1,TLR2,TLR3,TNFRSF11B,TNFSF10,TNMD,TOB1,TPD52L2,TSC22D3,UBD,UBE2L6,UBE2V2,UGCG,VCAM1,V |
| MAPK1 | 0,300  | kinase   | Inhibited | -6,373 | -6,362 | 0,001 | 1,53E-21 | 6,63E-19 | ACO1,ADAR,ANPEP,APBB3,ARC,ATF3,AURKA,BTN3A3,C1S,CAPN2,CAV3,CCL1,CCN2,CCNB1,CDKN1B,CFB,CGA,CISH,CRABP2,CRYL1,CSTA,DDX58,DNMT1,DSE,DUSP1,DUSP2,EGR1,ENDOD1,ENO3,ERAP1,ESR1,EXOC2,FHL2,FN1,FOS,FOSB,FOXP3,GBP1,GBP2,GRAMD1B,HBB,HLA-B,HLA-C,HLA-DMA,HLA-E,HMOX1,IFI16,IFI35,IFI44,IFIH1,IFIT2,IFIT3,IFIT5,IFITM1,IL13,IRF7,IRF9,ISG15,ITGAV,ITGB3,JUNB,JUND,LGALS1,LGALS3BP,LHB,MAPK13,MAST3,MITF,MMP1,MNS1,MVP,MYBL2,NFE2L2,NMI,NOS2,NOX5,NPPA,NR4A1,NRP1,OAS1,OLFM2A,PARP12,PHF11,PLSCR1,PPT2,PRL,PROS1,PSMB8,PSMB9,PTPRK,RFPL1/RFPL3,RGS16,RGS2,SNAI1,SOCS2,SP110,SPP1,SPRY2,SPRY4,STAT1,SUN2,TAP1,TBX21,TD RD7,TLR3,TM4SF5,TMEM87A,TNFSF10,TP53,TRIM21,TRIM22,TRIM38,TRIM5,TSKU,UBE2C,UBE2I,UBE2L6,VDR,VIM, ZC3H4V4                                                                                                                                                                                                                                                                                                                                                                                                                                                                                                                                                                                                                                                                          |
| HRAS  | 0,270  | enzyme   |           | 0,093  | 0,306  | 0,024 | 3,05E-21 | 1,26E-18 | A2M,ACTG1,ADM,AFF,ALDH1A3,ANXA2,ANXA3,APP,ARF1,ASNS,ATP1A3,AURKA,B2M,BAX,BMP7,BTG2,CACNG4,CALU,CAPG,CAPN2,CAV3,CCN2,CCNA2,CCNB1,CD24,CD44,CD81,CDH3,CDK1,CDK4,CDK7,CDKN1B,CDX2,CFB,CGA,CISH,CLU,COL18A1,COL1A1,COL1A2,COL3A1,COL4A1,COL5A2,COPB2,CRABP2,CSR2,CSTA,CTSS,CTSV,CTSZ,CYP24A1,DDIT3,DNMT1,DPF1,DPP4,DTYMK,DUSP1,EGR1,EIF4E2,EIF4G3,ELK1,ELK3,ELN,EPHX1,FAS,FERMT2,FGFBP1,FHL1,FKBP6,FN1,FOS,FOSB,FOSL1,FOXO1,FSTL1,FURIN,FUT7,FZD1,GADD45G,GAS6,GNB1,GRN,HIF1A,HLA-B,HMOX1,HOXB6,HOXC8,HRAS,HTRA1,IFI30,IFITM2,IGFBP4,IL13RA1,ITGA6,ITGAE,ITGAV,IVL,JUNB,KLF3,KRAS,KRT19,LASP1,LOXL1,LPP,LRRC17,LXN,LYZ,MAPK1,MCAM,MEET,MMP1,MYH10,MYL12A,MYOD1,MYOG,NFKBIA,NNAT,NOS2,NPPA,NRP1,OSBP2,P4HB,PAFAH1B3,PCDHGA1,PCK1,PCNA,PDCD4,PDIA5,PDLIM1,PER2,PFN1,PKP1,PLOD1,PLOD2,PLS3,PLTP,POLR2G,POSTN,PPIC,PRKCA,PRKCD,PSEN1,PSMB9,PTEN,RBBP7,RBPMS,RHOA,RHOB,RRM1,RRM2,RSU1,S100A4,SEM1,SERPINA3,SERPINE2,SLC1A7,SLC5A5,SLN,SNAI1,SOAT1,SOCS2,SOX4,SPP1,SPRY2,SPRY4,STAU1,SYN1,TAP1,TBP,TERT,TLN2,TMSB10/TMSB4X,TP53,TP73,TRPV1,TSPAN6,TYMS,TYRO3,VCAN,VEGFA,VIM,YAP1                                                                                                                                                                                                                                                                                                                        |



|                     |                                 |           |        |       |          |          |                                                                                                                                                                                                                                                                                                                                                                                                                                                                                                                                                                                                                                                                                                                                                                                                                                                                                                                                                   |                                                                                                                                                                                                                                                                                                                                                                                                                                                                                                                                                                                                                                                                                                                                                                                                                                                                                                                                                                                                                                                                                                                                                                                                   |
|---------------------|---------------------------------|-----------|--------|-------|----------|----------|---------------------------------------------------------------------------------------------------------------------------------------------------------------------------------------------------------------------------------------------------------------------------------------------------------------------------------------------------------------------------------------------------------------------------------------------------------------------------------------------------------------------------------------------------------------------------------------------------------------------------------------------------------------------------------------------------------------------------------------------------------------------------------------------------------------------------------------------------------------------------------------------------------------------------------------------------|---------------------------------------------------------------------------------------------------------------------------------------------------------------------------------------------------------------------------------------------------------------------------------------------------------------------------------------------------------------------------------------------------------------------------------------------------------------------------------------------------------------------------------------------------------------------------------------------------------------------------------------------------------------------------------------------------------------------------------------------------------------------------------------------------------------------------------------------------------------------------------------------------------------------------------------------------------------------------------------------------------------------------------------------------------------------------------------------------------------------------------------------------------------------------------------------------|
| dihydrotestosterone | chemical - endogenous mammalian | -0,719    | -0,320 | 0,039 | 4,65E-21 | 1,83E-18 | ABCA1,ABCC4,ABCG1,ACACA,ACKR3,ADAMTS1,ADIPOQ,ADM,ALAS1,ALDH1A3,ALDOA,APOD,APOM,APP,ARFGAP3,AVP,AZGP1,B2M,BAX,BCAP31,BTG2,C1orf116,C1orf21,CANX,CASP1,CASP3,CASP8,CCL16,CCN2,CCNA2,CCNB1,CCT3,CD63,CD74,CDC20,CDKN1B,CGA,CHI3L1,CLU,COL3A1,COL4A1,COL5A2,COL5A3,CSNK2A1,CST6,CST8,CYBB,CYP4A11,DBI,DCTPP1,DHCR24,DPP4,DTL,DYNC1L2,DYNLL1,EGF,EGR1,ELAVL1,ELN,ENO1,ESR1,FN1,FOS,FOXO1,FOXP3,FRK,FZD6,G0S2,GAS6,GHR,GLUL,GNMT,GPD1,GPI,GPX5,GRB10,GRN,GSTP1,GTF2I,HLA-A,HPGD,HSD11B2,HSD3B2,IGFBP4,IL17RB,INSR,KLK1,KLK3,KLK7,KRT19,LDLR,LEP,LGALS1,LHB,LPL,LYZ,MAFF,MCAM,MCM5,ME1,MGLL,MME,MMP1,MMP7,MUC1,MYO1,NDRG1,NEDD4L,NFKBIA,NNAT,NOS1,NOS2,NR4A1,ODC1,PAM,PCK1,PDCD4,PDYN,PEA15,PER1,PER2,PFN1,PHF21A,PIP,POSTN,PPARA,PPARG,PROS1,RAB27A,RAD50,RARG,RB1,RHOB,RPLP2,SELENBP1,SERPINE2,SGK1,SHC1,SLC16A7,SLC19A2,SLC2A4,SLC2A5,SLC7A7,SNAI1,SPP1,SRD5A2,STARD8,STAT5A,TALDO1,TERT,TFPI,TGFBR3,TKT,TMPRSS2,TNFSF10,TP53,VCAM1,VCAN,VEGFA,VIM,VL |                                                                                                                                                                                                                                                                                                                                                                                                                                                                                                                                                                                                                                                                                                                                                                                                                                                                                                                                                                                                                                                                                                                                                                                                   |
| ERBB2               | kinase                          | Activated | 2,149  | 2,596 | 0,041    | 7,74E-20 | 2,66E-17                                                                                                                                                                                                                                                                                                                                                                                                                                                                                                                                                                                                                                                                                                                                                                                                                                                                                                                                          | ABCG2,ABL1,AGR2,AIMP2,ALAD,ALAS1,ALDOC,ANGPTL2,ANXA2,AURKA,BAG2,BCAT2,BHLHE40,BMP7,BTG2,CAPZA2,CAVIN2,CAVIN3,CCL20,CCN2,CCN5,CCNA2,CCNB1,CNBN2,CD47,CD59,CDC20,CDC23,CDC25B,CDC7,CDH3,CDK1,CDKN1B,CDKN3,CIDEC,CKS2,CLDN3,CLU,CMAS,COL18A1,COL1A1,COL3A1,COL4A1,COL5A2,COL6A3,CSE1L,CST8,CUL1,DDIT3,DERL1,DNAJB6,DPEP1,DPT,DSG2,EGR1,ELK1,ELK3,ELL2,EMP3,ESPL1,ESR1,FEZ2,FN1,FOS,FOXO1,FSTL1,FXD3,GALNT3,GAS6,GHR,GINS1,GNAI1,GSPT2,HBEGF,HEYL,HIF1A,HMGB2,HSPB8,HTRA1,IDI1,IGFBP4,IL25,IL6R,ITGA6,ITGB3,JAK1,JUNB,KCNN4,KDM5B,KLK3,KRT81,LAMB1,LAMP1,LCN2,LGALS1,LPCAT1,LRRFIP1,LSR,LTBP2,LUM,LXN,MACF1,MAP2K3,MAPK13,MCM2,MCM3,MC5,MITF,MME,MMP1,MMP7,MUC1,MXI1,MYBL2,NDC80,NDRG1,NET1,NFKB1,NNMT,NOS2,NOTCH4,NRP1,NUCB2,ORC2,PCK2,PCNA,PDCD4,PDHA1,PDIA4,PKD4,PHYH,POLD3,POLE2,POLR2E,POLR2G,POLR2L,PPARG,PRC1,PRL,PRO1,PRSS3,PSEN1,PSMB9,PTEN,PTPRB,PTPRK,RALB,RARG,RFC2,RFC4,RFC5,RHOB,RPA1,RPA2,RRM1,RRM2,S100A4,S100A6,SEC61A1,SERPINA3,SERPINI1,SLC1A6,SLPI,SMAD2,SNAI1,SOCS2,SOWAHC,SOX4,SPDEF,SPINK4,SPINT1,SPINT2,SQOR,ST3GAL4,ST3GAL6,STAT3,TAP1,TAPBP,TCEAL9,TERT,TGFBI,TGM1,THBS4,TMEM43,TNC,TNS4,TP53,TPD52L1,TPM1,TUBA1A,TUBB4A,TYMS,UBE2C,USP14,VCAN,VDR,VEGFA,VIM,WT1,WWC1,ZWINT |
| butyric acid        | chemical - endogenous mammalian | -0,831    | -0,760 | 0,008 | 8,34E-20 | 2,75E-17 | A2M,ADCY1,ADGRG1,ADH6,ALAD,ALB,ALDH1A1,ALOX15B,ALOX5,ALPG,ANXA1,ANXA2,ANXA5,BAG1,BAX,CALM1 (includes others),CAP1,CASP3,CCL20,CCNA2,CCNB1,CCNB2,CCNC,CD44,CD81,CD83,CDC20,CDK1,CDK4,CDKN1B,CDKN1C,CGA,CLCN3,CLDN1,CLU,COL4A1,COL4A2,COL5A2,COL6A3,CUL1,CYP2B6,CYP4A11,DDR1,DEK,DHCR24,DPP6,DTYMK,DUSP1,E2F4,EIF4G2,ELK3,EMP3,ERCC2,ESR1,FOS,FSTL1,FURIN,G0S2,G6PC,GADD45A,GATA6,GBP2,GLI3,GRN,GSTA1,GSTP1,H1-2,HBB,HK1,HLA-DRA,HLA-DRB1,HMGB2,IFI16,IFI30,IFIT3,IFITM1,IFITM2,IFNAR2,IFNGR2,IL32,INPP5J,IQGAP1,KLK3,KRAS,LEP,MAPK13,MMP7,MPP3,MUC1,MVP,MYCL,NAMPT,NEU1,NEU3,NFATC4,NFKB1,NFKBIA,NKX2-5,NME1,NOS2,NR4A1,NRAS,NRP1,PCK1,PCNA,PDIA3,PK2,PDYN,PLCB2,PLSCR1,POLR2L,PPARG,PRKCD,PTEN,PTGDS,RB1,RHOA,RXRA,SEC61B,SGK1,SLC1A2,SLC26A2,SLC5A5,SPP1,STAT3,TGFBI,TGM1,THBS4,TIMP1,TP53,T                                                                                                                                                     |                                                                                                                                                                                                                                                                                                                                                                                                                                                                                                                                                                                                                                                                                                                                                                                                                                                                                                                                                                                                                                                                                                                                                                                                   |

|              |                                       |        |        |       |          |          |                                                                                                                                                                                                                                                                                                                                                                                                                                                                                                                                                                                                                                                                                                                                                                                                                                                                                                                                                                                                                                                                                                                                                                                                                                                                                                                                                                                                                                                 |
|--------------|---------------------------------------|--------|--------|-------|----------|----------|-------------------------------------------------------------------------------------------------------------------------------------------------------------------------------------------------------------------------------------------------------------------------------------------------------------------------------------------------------------------------------------------------------------------------------------------------------------------------------------------------------------------------------------------------------------------------------------------------------------------------------------------------------------------------------------------------------------------------------------------------------------------------------------------------------------------------------------------------------------------------------------------------------------------------------------------------------------------------------------------------------------------------------------------------------------------------------------------------------------------------------------------------------------------------------------------------------------------------------------------------------------------------------------------------------------------------------------------------------------------------------------------------------------------------------------------------|
| progesterone | chemical -<br>endogenous<br>mammalian | -1,134 | -0,904 | 0,020 | 1,31E-19 | 4,00E-17 | ABCG2,ACAT1,ADAMTS1,ADIPOQ,ADM,ALDH1A1,ALPL,ANKH,AP1G1,APOD,ATF3,AURKA,B3GALNT1,BAX,BHLHE40,C3,CA2,CASP3,CCL25,CCN5,CCNA2,CCNB1,CCNB2,CDKN1B,CFB,CFD,CIDEC,CITED2,CLCA1,CLDN3,COL15A1,COMT,CRYAB,CTSF,CTSV,CYP26A1,CYP2A6 (includes others),CYP2B6,CYP2C8,CYP3A4,CYP3A5,DDIT3,DPP4,DRD2,EGF,EGR1,EIF5B,ELL2,ESPL1,ESR1,F2RL1,F3,FAAH,FKBP3,FN1,FOS,FOXO1,FOXP3,FRAT2,GABARAPL1,GAD1,GARS1,GAS6,GCH1,GHR,GNMT,GRB10,GRIA3,GRINA,GSTA3,HBEGF,HGFAC,HIF1A,HLA-DQB1,HLA-G,HOPX,HOXA10,HSD11B2,HSD17B4,IHH,IL13,IL15,IL6R,INHHA,INSR,KLF9,CLK1,CLK3,LCN2,LEFTY2,LEPR,LEPROT,LGALS1,LHB,LPL,LT,FXN,MAD2L1,MAP2K3,MCM2,MCM3,MCM5,ME1,MME,MMP1,MMP26,MMP7,MPZ,MUC1,MYBL2,NDRG1,NET1,NFIL3,NFKBIA,NOS2,NR4A1,NRP1,NSUN5,NT5C2,NTF3,P2RX4,PCDH1,PCK1,PCNA,PDHA1,PDLIM1,PER2,PHF21A,PIGR,PIP5K1B,PKM,PLK2,POSTN,PPARG,PRL,PROS1,PTGDS,PTGER3,RAP2C,RBP1,RRM2,S100A6,SCNN1B,SFN,SGK1,SMAD2,SOD2,SPP1,SSTR3,ST3GAL4,STAT1,STAT3,STAT5A,STEAP1,TBX2,TERT,TGFBI,TGFBR3,TGM1,TIMP1,TIPARP,TNFSF10,TNS2,TP53,UGCG,VDR,VEGFA,VIM,WDR33,WNT6,WNT7B,ZNFX1                                                                                                                                                                                                                                                                                                                                                                                                           |
| EGF          | growth factor                         | 0,341  | 0,877  | 0,049 | 2,43E-19 | 7,18E-17 | ABCG2,ABI1,ACTN1,AFP,ALOX12,ANPEP,APOA1,ARC,ATF3,AURKA,B4GALT5,BET1,BIRC2,BTG2,CASP1,CASP3,CAVIN2,CCL17,CCL20,CCN2,CCNB1,CD44,CDK1,CDK4,CDKN1B,CDX2,CEBPE,CGA,CISH,CKS2,CLCN3,CLDN3,CLU,COL1A1,COL1A2,COL3A1,CTCF,CTSD,CXCL6,CYP2B6,DAD1,DDIT3,DIO3,DNAI1,DPP4,DUSP1,EGR1,EGR3,ELK1,ENAH,ESR1,F3,FN1,FOS,FOSB,FOSL1,FSTL1,GADD45A,GAST,GDF2,GFPT1,GSTP1,HBEGF,HIF1A,HMOX1,HNF4A,HPGD,HRAS,HSD3B2,IDI1,IER2,IGFALS,IGFBP4,ITGB3,JUNB,JUND,CLK3,KRAS,KRT19,LCN2,LPCAT3,LSM1,LT,FXN,MAD2L1,MAPK1,MB,MET,MMP1,MUC1,MUC5B,MYOG,NES,NGF,NO2,NPPA,NR4A1,NR4A3,NRP1,ODC1,PBK,PCNA,PDCD4,PK4,PER1,PFKFB1,PLSCR1,PPARG,PIIB,PRL,PROM1,PTPN12,PTTG1,RAB5A,RAC1,RHOA,RHOB,RRM1,RRM2,RXRAS,S100A10,S100A11,S100A4,SERPINA3,SH2B3,SHC1,SLC1A2,SLC2A4,SMAD1,SNAI1,SOX4,SPP1,SPRY2,SPRY4,ST3GAL4,STAT1,TBP,TERT,TFPI2,TGM1,TIMP1,TM4SF5,TNC,TP53,ULK1,VAMP2,VCAM1,VCAN,VDR,VEGFA,VIM,ZFP36                                                                                                                                                                                                                                                                                                                                                                                                                                                                                                                                                                      |
| IL4          | cytokine                              | 0,502  | 1,072  | 0,042 | 4,39E-19 | 1,25E-16 | ABCA1,ABLIM1,ACTG1,AHR,ALAS1,ALDH2,ALDOC,ALOX12,ALOX15B,ALOX5,ALOX5AP,ANKRD55,ANXA1,ANXA2,ANXA4,APOLD1,ARMC6,ASCC3,ASS1,ATP1A3,BANF1,BAX,BAT2,BHLHE40,BIRC2,BNIP3L,BPIFA1,C3,CA2,CAND1,CAPG,CASP3,CASP6,CAT,CBFB,CBX3,CCL1,CCL17,CCL20,CCL22,CCL25,CCN2,CCR4,CCT3,CD163,CD1A,CD1B,CD33,CD44,CD5,CD58,CD74,CD83,CDK1,CDKN1B,CISH,CITED2,CKAP4,CLCN3,CNR2,COL18A1,COL1A1,COL1A2,COL6A3,CRLF2,CSF3,CTNNA1,CXCL6,CYB5A,CYBB,DCSTAMP,DC,T,DPP4,EBNA1BP2,EFL1,EPHX1,EXT1,F2RL1,F3,FAAH,FA5,FCER1G,FN1,FOS,FOSB,FOXP3,FUT7,FYCO1,GADD45G,GATM,GBP2,GZMA,HBEGF,HCLS1,HDAC1,HLA-DMA,HLA-DMB,HPGD,HSD3B2,IER2,IFI16,IFI30,IFI44,IFIH1,IFIT3,IFNAR2,IFNGR2,IGFBP4,IL10RA,IL13,IL13RA1,IL15,IL17RB,IL18,IP04,IRF7,IRF8,IRF9,ISG15,ITGAE,ITGAV,ITGB2,ITGB3,ITPA,JAK1,JUNB,JUND,KIF3A,KITLG,CLK3,CLK7,KRT10,LGALS1,LGALS3BP,LMAN2,LPL,LTA,LTB,LY75,MAPK1,MCM5,MMP1,MSH2,MUC1,MYOD1,MYOF,MYOG,NAB2,NDRG1,NFIL3,NFKB1,NFKBIA,NOCT,NOS2,NR4A3,NRP1,NUP155,PCD1,PDE1B,PFKP,PIGR,PIM1,PLA2G4C,PLBD1,PLOD2,PLSCR1,PMS1,PNP,POLE2,POSTN,PPARG,PREPL,PRKCA,PRKCD,PROS1,PSMA6,PSMB10,PSMB8,PSME1,RAB5A,RAD50,RHOA,RIDA,RIN1,S100A10,SAMSN1,SDF2L1,SEMA4A,SEMA4D,SOCS2,SOX13,SPHK2,SPINK5,SPINT2,SPP1,SQSTM1,ST14,STAT1,STAT5A,STK39,STUB1,SWAP70,SYNGR2,SYT11,TAPBP,TBX21,TES,TFAP4,TGFBI,TIMP1,TLE1,TLN2,TLR2,TMED5,TMEM131,TNC,TNFRSF11B,TP53,TPD52L2,TXLNA,TYRO3,UBR4,UCLH3,USO1,USP2,VCAM1,VDR,VEGFA,VIM,VPS13C,VPS35,VTCN1,XPO7,XPOT,XRCC5,ZBP1,ZFP36,ZNF195,ZZZ3 |

|      |        |                                   |        |        |       |          |          |                                                                                                                                                                                                                                                                                                                                                                                                                                                                                                                                                                                                                                                                                                                                                                                                                                                                                                                                                                                                                                                     |
|------|--------|-----------------------------------|--------|--------|-------|----------|----------|-----------------------------------------------------------------------------------------------------------------------------------------------------------------------------------------------------------------------------------------------------------------------------------------------------------------------------------------------------------------------------------------------------------------------------------------------------------------------------------------------------------------------------------------------------------------------------------------------------------------------------------------------------------------------------------------------------------------------------------------------------------------------------------------------------------------------------------------------------------------------------------------------------------------------------------------------------------------------------------------------------------------------------------------------------|
| IGF1 | -0,305 | growth factor                     | -0,899 | -0,479 | 0,038 | 4,81E-19 | 1,29E-16 | A2M,ABCA1,ACACA,ACTR1B,ADIPOQ,ADM,AKR1B1,AKR1C1/AKR1C2,ANPEP,APP,BAX,BHLHE40,BTG2,C1QA,CACNA1S,CASP3,CAVIN2,CCN2,CCNA2,CCNB1,CD44,CD70,CDK1,CDK4,CDKN1B,CISH,CITED2,CLU,COL1A1,COL3A1,CSHL1,CTSD,CXCL6,CYBA,CYBB,CYFIP2,CYP27B1,DDIT3,DDX50,DUSP1,EGF,EGR1,ELN,ESR1,F3,FJX1,FN1,FOS,FOXB,FOXC2,FOXO1,GADD45A,GADD45G,GCK,GHR,GHRH,GPD1,HBB,HIF1A,HMOX1,HSD11B2,HSPA4,HSPA5,IER2,IFNGR2,IGFBP4,IHH,IL18,INHA,INSR,ITGAV,JUNB,KAT2A,KIF1A,KLK6,LAMP1,LASP1,LCN2,LEP,LEPR,LPL,MAPK1,MAPT,MMP1,MPZ,MUC5B,MX1,MYOD1,MYOG,NCF2,NFE2L2,NFKBIA,NOS2,NPPA,NR4A1,ODC1,OSMR,PARP1,PBK,PCK2,PCNA,PDYN,PIM1,PITX3,PKM,PLK2,PPARG,PRL,PSMB8,PSMB9,PTEN,PTPRC,PYY,SEC23A,SFN,SGK1,SHBG,SIRT2,SLC12A6,SLC1A6,SLC2A4,SLC5A5,SLPI,SNCG,SPP1,SST,SYN1,TAP1,TBX2,TGFBI,TNFRSF11B,TP53,TRPV1,TF2,UBE2D2,UGCG,VCAM1,VEGFA,VIM,WEE1,WT1,ZFP36                                                                                                                                                                                                                              |
| CD3  |        | complex                           | 1,239  | 1,902  | 0,058 | 1,63E-17 | 3,95E-15 | ACTR3,AHR,AIMP1,ALAS1,ANXA1,APBA1,ARHGDI3,BECN1,C1R,C2,CALM1 (includes others),CAMK2A,CASP3,CASP6,CASP8,CCL1,CCL17,CCL20,CCL22,CCR4,CD44,CD5,CD53,CD74,CD83,CDK1,CDK2A,P1,CDK4,CDK7,CDKN1B,CISH,CKS2,CLCN1,CNIH4,COPB2,CRLF2,CTLA4,CYBA,DAD1,DPP4,DUSP2,DUSP22,E2F4,EGR3,EIF4A3,ELAVL3,ELK3,EXOSC8,FAS,FCER1G,FKBP1A,FKBP3,FOS,FOXP3,FUT7,GBP1,GLI1,GNAS,GNL2,GTF2IRD1,GTPBP4,GUCY1B1,GZMA,HAT1,HAX1,HCCS,HIF1A,HILA-DQB1,HNRNPF,HNRNPR,HPX,HSP90B1,HSPA5,IFI35,IFITM1,IFNGR1,IL10RB,IL13,IL32,ILF2,IRF8,IRF9,JAK1,JUNB,KATNA1,KCNA5,KCNN4,KDEL2,KLK7,LAMP1,LTA,LYN,MACROH2A1,MAP3K10,MAPK1,MCM5,MTHFD2,NAMPT,NFE2L2,NFKB1,NFKBIA,NME1,NOS1,NOS2,NR4A1,ODC1,P4HB,PAFAH1B3,PCBP2,PCNA,PDCD1,PDCD5,PDIA4,PFN1,PKLR,PLA2R1,PNP,PPA1,PPARG,PRDX4,PSMA5,PSMA6,PTEN,PTP4A2,PTPRC,RAB8A,RAC2,RAD23B,RARS1,RB1,RHOC,RORA,RORC,RXRA,RYK,S100A11,SEC61B,SH2D2A,SHC1,SLPI,SMPDL3B,SNRPB,SOCS2,SPINK4,SSB,STAT1,STMN1,SYNPO,TBX21,TFPI2,TLR2,TMPO,TNFSF10,TP73,TPST1,TRA2A,TRIM24,TRIM5,TSPAN7,TSTA3,TXNRD1,VBP1,VEGFA,VPS4B,WEE1,YARS1,ZBTB32,ZFP36,ZNF140,ZNF |
| RXRA | -0,316 | ligand-dependent nuclear receptor | -1,619 | -1,503 | 0,016 | 6,06E-17 | 1,38E-14 | ABCA1,ABCC3,ABCG1,ABCG2,ACACA,ACACB,AHCY,AKR1C1/AKR1C2,ALDH1A1,APOA1,APOC3,APOM,APP,ARL4C,ASNS,BAAT,C1QA,C3,CAT,CCL17,CCL20,CCL22,CCNA2,CCNB1,CEBPE,COL1A1,CRABP2,CRYAB,CSHL1,CTSS,CYP24A1,CYP26A1,CYP27B1,CYP2B6,CYP3A4,CYP3A5,CYP4A11,DR1,DRD2,EPHX1,FABP1,FABP2,FABP6,FLRT3,FOS,FSTL1,GAS6,GCK,GPD1,HBEGF,HIF1A,HMOX1,HNF1B,HNFA4,HOXB1,HSD17B4,IL13,KLF9,LCN2,LPL,LTF,LYZ,MLXIPL,MYL7,MYOG,NME1,NPC1L1,NPPA,NR0B2,NRGN,PCK1,PKCK2,PKLR,PLTP,PPARA,PPARG,PRL,PTGDS,RARG,RBP1,RGR,RLBP1,RORA,RORC,RXRA,S100A4,SEMA4D,SLC10A1,SLC10A2,SLC2A4,SLC34A1,SPP1,STRA6,TBXA2R,VCAN,VDR,VEGFA,WFF1                                                                                                                                                                                                                                                                                                                                                                                                                                                         |

|                   |        |                         |        |        |       |          |          |                                                                                                                                                                                                                                                                                                                                                                                                                                                                                                                                                                                                                                                                                                                                                                                                                                                                                                                                                                                                                                                                                                                                                                                                                                       |
|-------------------|--------|-------------------------|--------|--------|-------|----------|----------|---------------------------------------------------------------------------------------------------------------------------------------------------------------------------------------------------------------------------------------------------------------------------------------------------------------------------------------------------------------------------------------------------------------------------------------------------------------------------------------------------------------------------------------------------------------------------------------------------------------------------------------------------------------------------------------------------------------------------------------------------------------------------------------------------------------------------------------------------------------------------------------------------------------------------------------------------------------------------------------------------------------------------------------------------------------------------------------------------------------------------------------------------------------------------------------------------------------------------------------|
| NFkB<br>(complex) |        | complex                 | 0,164  | 0,896  | 0,068 | 6,20E-17 | 1,38E-14 | A2M,ABCG1,ACKR3,ADM,AHR,ALDH1A3,ALDH7A1,AMPH,APP,AQP5,ATF3,BAG2,BAX,BECN1,BID,BIRC2,BLVRA,BPIFA1,C1R,C3,CAPNS1,CASP4,CASP7,CASP8,CAV3,CCL1,CCL17,CCL20,CCL22,CCN2,CCNB1,CCNB2,CD44,CD74,CD83,CD99,CDC25B,CDX1,CDX2,CFB,CLU,COL18A1,COL1A2,CSF3,CSNK2A1,CTCF,CXCL6,CYBB,CYP3A4,CYP3A5,DAD1,DDIT3,DIO1,DMBT1,DRD2,DUSP2,EGR1,ELK1,ELL2,EPCAM,ERAP1,F2RL1,F3,FABP6,FAS,FGF1,FGF5,FN1,FOS,FOX1,FOX3,G0S2,GAD1,GADD45A,GADD45B,GAS6,GAST,GBP2,GCH1,GLA,GNAS,HDAC6,HGFAC,HIF1A,HLA-A,HLA-DMB,HLA-F,HMOX1,HNF4A,IFNAR2,IL13,IL15,IL18,IL32,IRF7,ISG15,ITGAV,ITGB8,ITPKB,JUNB,KLF3,KRT19,KYNU,LCN2,LTA,LTB,MFHAS1,MMP1,MSH2,MUC5B,NAMPT,NCF2,NFKB1,NFKBIA,NFKBIE,NGF,NOS1,NOS2,NPPA,NUP62,ODC1,PEA15,PECAM1,PKP1,PLK2,PLK3,PPARA,PPARG,PPIF,PPM1D,PRKCD,PSMB9,RGS16,RRAS,SCFD1,SEN2,SERPINA3,SLC1A2,SLC22A4,SLC2A4,SLC2A5,SLC37A4,SLIT2,SLPI,SOAT1,SOD2,SPP1,STAT5A,STX4,TAP1,TCF12,TERF2IP,TERT,TFPI2,TIMP1,TLR2,TNFAIP8,TNFRSF11B,TNFSF10,TP53,TRIM38,UBD,VCAM1,VEGFA,VIM,XRCC5,ZFP36                                                                                                                                                                                                                                                       |
| CTNNB1            | -0,034 | transcription regulator | -1,715 | -1,193 | 0,058 | 6,93E-17 | 1,51E-14 | ABCC1,ACACA,ACAP1,ACAT1,ACTR3,ACTR8,ADIPOQ,AFP,AGRN,AHR,AKAP13,ALDH1A1,ALDH1A3,ALDH3A2,ANXA1,APOD,APP,AQP5,ARFGAP3,ATOH1,AURKA,BCAP31,BECN1,BHLHE40,BMP7,BTF3,CALM1 (includes others),CAPN1,CAPNS1,CASP7,CCN2,CCNA2,CD44,CD47,CD99,CDK7,CDKN1B,CDX1,CDX2,CENPM,CER1,CFD,CIDEC,CLU,CNTFR,COL1A1,COL4A1,COL4A2,CRABP2,CRAT,CSF3,CTNNA1,CTSF,CTSZ,CXCL6,CXXC4,CYB5A,CYFIP2,CYP24A1,CYP2A6 (includes others),CYP4F12,CYP7B1,DCT,DDIT3,DDX50,DIO1,DPEP1,EGR1,ENO3,EPCAM,EPHB3,EVX1,FAS,FBRS,FCER1G,FGF16,FGF5,FGFBP1,FN1,FOS,FOSL1,FOXC2,GAD1,GADD45B,GADD45G,GAST,GCH1,GDF9,GHR,GLI1,GLI3,GLUL,GRAMD4,HNF1A,HNF4A,HOXB7,HTATIP2,HTRA1,IFITM1,IHH,IL13,IL7,IMPDH2,INHA,IRF8,ITGA6,ITGB2,KITLG,KLK3,LAMB1,LHB,LIMD2,LIPA,LMX1B,LPL,MAN2B1,ME1,MITF,MME,MMP1,MMP7,MPZ,MPZL2,MUC6,MYOD1,MYOG,NES,NEUROG1,NKX2-5,NOS2,NPHS2,NPTX1,NR4A1,NRCAM,OAT,PAR3,PCNA,PDYN,PECAM1,PFN1,PIP5K1B,PLS3,POLR2E,PPARG,PRDM14,PRRC2A,PRX,PTCH2,PTCRA,PTEN,QPCT,RAB3A,RAI14,S100A4,SCRN1,SEC61A1,SERPINA3,SERPINE2,SFN,SGK1,SLC12A2,SLC1A2,SLC26A2,SNAI1,SNRNP70,SORBS3,SOX4,SPP1,SPRY4,SQSTM1,STAT3,STAT5A,TBX21,TCF12,TERT,TGM1,TIA1,TIMP1,TNC,TNFRSF11B,TNFSF10,TNNC1,TP53,TP73,TSPAN8,UGCG,UPB1,USO1,USP46,VCAM1,VCAN,VEGFA,VIM,WIF1,WNT11,WNT2,WNT6,WNT7B, |
| STAT3             | 0,283  | transcription regulator | -0,340 | 0,048  | 0,039 | 4,56E-16 | 9,41E-14 | A2M,ADIPOQ,ADM,AHR,ALDH1A1,ALDH1A3,ATOH1,BECN1,BNIP3L,CA9,CASP1,CASP3,CASP7,CAT,CCL17,CCL20,CCN2,CCNB1,CCNC,CD74,CD83,CDK1,CDKN1B,CFB,CHI3L1,CLIC5,COL1A1,COL1A2,COL3A1,CSF3,CTF1,CTLA4,CXCL6,CYP26A1,DDIT3,DLEC1,DMBT1,DNMT1,DPP4,ECT2,EE2,EGR1,EGR3,ESR1,F3,FAS,FCER1G,FERMT2,FGL2,FLRT3,FN1,FOS,FOX3,FUT4,G6PC,GADD45A,GADD45G,GBP2,GPR65,HBB,HERC6,HIF1A,HLA-A,HLA-DMA,HMOX1,HNF4A,HOXA10,IFI16,IFI30,IFI35,IFI44,IFIH1,IFIT2,IFIT3,IFIT5,IFITM1,IFITM2,IHH,IL13,IL6R,IL7,IRF7,IRF9,ISG15,ITGAV,ITGB2,ITGB6,JUNB,KLK3,LEP,LEPR,LTA,LTF,LYZ,MITF,MMP7,MRAS,MUC1,MX1,MXI1,MYOD1,MYOG,NAMPT,NDRG1,NES,NFKB1,NOS2,NOX5,NPPA,NRP1,OAS1,PCK1,PDCD1,PDIA4,PECAM1,PIM1,PLSCR1,PROM1,PSIP1,PSMB8,PSMB9,PTK2,PTTG1,RAB27A,REG1A,RORA,RORC,SERPINA3,SERPINE1,SERPINE2,SGK1,SNAI1,SOD2,SP110,STAT1,STAT3,STC2,SYNPO,TAP1,TBX21,TERT,TFPI2,TIMP1,TLR3,TNFSF10,TNS1,TNS4,TP53,TRIM22,TRIM5,TRIM2,UBD,VCAN,VEGFA,VIM,WIF1,ZFP36                                                                                                                                                                                                                                                                                                                  |

|         |        |                         |           |        |        |          |          |                                                                                                                                                                                                                                                                                                                                                                                                                                                                                                                                                                                                                                                                                                                                                                                                                                                                                         |                                                                                                                                                                                                                                                                                                                                                                                                                                                                                                                                                                                                                                                                                                                            |
|---------|--------|-------------------------|-----------|--------|--------|----------|----------|-----------------------------------------------------------------------------------------------------------------------------------------------------------------------------------------------------------------------------------------------------------------------------------------------------------------------------------------------------------------------------------------------------------------------------------------------------------------------------------------------------------------------------------------------------------------------------------------------------------------------------------------------------------------------------------------------------------------------------------------------------------------------------------------------------------------------------------------------------------------------------------------|----------------------------------------------------------------------------------------------------------------------------------------------------------------------------------------------------------------------------------------------------------------------------------------------------------------------------------------------------------------------------------------------------------------------------------------------------------------------------------------------------------------------------------------------------------------------------------------------------------------------------------------------------------------------------------------------------------------------------|
| FOS     | -1,524 | transcription regulator | 0,201     | 0,380  | 0,021  | 6,05E-16 | 1,22E-13 | A2M,ABCC1,ACACA,ACTG1,ADD2,ADNP,AGPS,ALAS1,ALDH1A3,ANKRD2,ANXA4,ARF1,ARPC5,ATF3,ATF7IP,CA2,CALU,CAPN2,CASP3,CAST,CAT,CCL20,CCN2,CCNA2,CD44,CGA,CHI3L1,CLU,COL18A1,COL1A1,CRABP1,CRABP2,CSF3,CSTA,CTH,CTSV,DAPK2,DNMT1,DSG3,EGR1,EIF4G2,ELOVL6,ENAH,ENO1,ESM1,EVX1,F3,FBN1,FEZ2,FN1,FOS,FOSB,FOSL1,FSTL1,FZD5,FZD6,G6PC,GM2A,GSTP1,HDAC6,HLA-B,HMOX1,HPGD,HSD3B2,HSP90B1,HSPA5,HSPB8,HTATIP2,ITGA6,IVL,JUNB,KCNN4,KIF2A,KITLG,LGALS3BP,LHB,PCAT3,LPL,LTBP2,MAP4K4,MCM5,MET,MMP1,MMP7,MPZL2,NAA80,NAE1,NCF2,NET1,NFE2L2,NFIL3,NGF,NOTCH4,NPPA,NPTX1,NR4A1,NUBP1,ODC1,PAOX,PFN1,PIP5K1B,PLK2,PRL,PTGDS,PTP4A2,PTPN12,PTPRO,PTS,PTTG1,RALB,RARG,RBBP7,RBP1,RXRA,S100A10,SEC23B,SELENBP1,SEMA3B,SEMA4D,SEMA6D,SERPINE2,SLC10A2,SLPI,SLURP1,SNAI1,SNAP23,SNCG,SNN,SPP1,STMN1,SULT2B1,SWAP70,TGFB1,TIMP1,TIPARP,TNFRSF11B,TNMD,TP53,TUBB,UGCG,VCAM1,VEGFA,VIM,WEE1,WNT10B,WNT11,WNT2,WNT7B,XDH |                                                                                                                                                                                                                                                                                                                                                                                                                                                                                                                                                                                                                                                                                                                            |
| PDGF BB |        | complex                 | Inhibited | -2,617 | -2,186 | 0,048    | 2,02E-15 | 3,78E-13                                                                                                                                                                                                                                                                                                                                                                                                                                                                                                                                                                                                                                                                                                                                                                                                                                                                                | ACKR3,ADM,AKAP12,ANXA11,ATF3,BHLHE40,BMP3,C3,CALM1 (includes others),CASP4,CAV2,CCL20,CCN2,CCNL1,CCR4,CD44,CDK1,CDK4,CDKN1B,COL18A1,COL3A1,CRYAB,CSF3,CSR2,CTH,DDIT3,DUSP1,EGR1,EGR3,EIF4E2,EIF4G1,ELAVL1,F3,FHL1,FHL2,FN1,FOS,FOSB,FOSL1,FOXC2,FZD1,GADD45A,GBP2,GHR,GLUL,GUCY1B1,HBEGF,HLA-E,HMOX1,HRAS,IER2,IGFBP4,JUNB,KRAS,LAMB2,LDLR,MP1,MYBL2,NAMPT,NFIL3,NOS1,NOS2,NR4A1,NR4A3,ODC1,PCNA,PDLIM1,PIM1,PLK2,POSTN,PPARG,PPP1R15A,PRRX2,QARS1,RACK1,RBP1,RFC5,RGS2,RHOB,RPN2,S1PR2,SERPINA3,SGK1,SLC6A4,SLC7A7,SNAI1,SOD2,STAT3,TAF9,TEAD4,TIMM17A,TIMP1,TNC,TOB1,TP53,TRA2B,TRIOBP,VCAM1,VCAN,VFCFA,XDH,ZFP36                                                                                                        |
| RELA    |        | transcription regulator |           | 1,148  | 1,626  | 0,053    | 2,79E-15 | 5,11E-13                                                                                                                                                                                                                                                                                                                                                                                                                                                                                                                                                                                                                                                                                                                                                                                                                                                                                | A2M,ABCG2,AFP,AHR,ALOX5AP,ANKRD2,APP,ARFGAP3,ARHGDIB,B2M,BAX,BECN1,BHLHE40,BIRC2,BLVR4,BNIP3L,BTG2,C3,CASP3,CASP8,CCL20,CCL22,CCN2,CD44,CD59,CDKN1B,CERT1,CFB,CHI3L1,CITED2,COL1A1,COL1A2,CRYAB,CTCF,CXCL6,CYBB,CYP2B6,CYP3A4,DDIT3,DUSP1,EGR1,ELN,EPCAM,ERAP1,F3,FABP6,FAS,FCGRT,FN1,FOS,FOSB,FOXP3,GAST,GBP1,GCH1,GSTA1,HIF1A,HLA-B,HMOX1,HNF4A,HSP90B1,IER2,IFNGR2,IL13,IL32,IRF7,ISG15,JUNB,LTA,LTB,LUM,LYN,MMP1,MST1R,MUC1,MYOD1,NAMPT,NFE2L2,NFKB1,NFKBIA,NFKBIE,NMI,NOS2,NOX5,NR4A1,NR4A3,PCK1,PECAM1,PKM,PLK3,PPARG,PPM1D,PRKCD,PSMB10,PSMB9,PTEN,PTGDS,RORC,S100A6,SRPINE2,SHBG,SLC1A2,SLC2A4,SLC2A5,SNAI1,SOD2,STAT5A,TAP1,TAPBP,TBX21,TERF2IP,TERT,TFPI2,THOC1,TLR2,TNFRSF11B,TP53,TP73,UBD,VCAM1,VEGFA,VIM,WT1 |
| CDKN1A  | -0,252 | kinase                  |           | -1,814 | -1,953 | -0,024   | 1,59E-14 | 2,73E-12                                                                                                                                                                                                                                                                                                                                                                                                                                                                                                                                                                                                                                                                                                                                                                                                                                                                                | AIMP1,APP,ARL6IP1,AURKA,BAX,BIRC2,BUB3,CASP3,CCN2,CCNA2,CCNB1,CDC20,CDC25B,CDK1,CDK4,CDKN1B,CDKN3,CIT,COL1A2,CRYAB,DLGAP5,DSE,DTL,DUSP1,FAS,FN1,GLB1,GRN,HMGB2,HSPA5,IL32,ITGAV,ITGB3,KIF20A,LBR,LGALS3BP,LUC7L3,MAD2L1,MCM2,MCM3,MMP1,MYBL2,MYOD1,P4HA1,PBK,PCLAF,PCNA,PELO,PLK2,PRC1,PTPRC,RB1,RFC4,RPA3,RRM1,SHC1,SLC30A5,SMC4,SOD2,STMN1,SUV39H1,TERT,TGM1,TP53,TP53I3,TRIM44,TUBB4A,TUBG2,TYMS,UBE2C,VEGFA,VGLL4,VIM,YTHDC1,ZRFD5,ZNF84                                                                                                                                                                                                                                                                               |

|           |        |                                   |        |        |       |          |          |                                                                                                                                                                                                                                                                                                                                                                                                                                                                                                                                                                                                                                                                                                                                                                                                                                                                                                                                                             |
|-----------|--------|-----------------------------------|--------|--------|-------|----------|----------|-------------------------------------------------------------------------------------------------------------------------------------------------------------------------------------------------------------------------------------------------------------------------------------------------------------------------------------------------------------------------------------------------------------------------------------------------------------------------------------------------------------------------------------------------------------------------------------------------------------------------------------------------------------------------------------------------------------------------------------------------------------------------------------------------------------------------------------------------------------------------------------------------------------------------------------------------------------|
| SP1       | 0,064  | transcription regulator           | -0,035 | 0,541  | 0,069 | 1,83E-14 | 2,97E-12 | ABCA1,ABCC8,ADAMTS1,AKAP12,ALDH3A2,ALOX12,ALOX15B,ALOX5,ALPL,ANKH,APOA1,APOC3,ASNS,ASS1,ATF3,B4GALT5,BAG2,BAX,BMP7,BNIP3L,CASP3,CAT,CCL20,CCL22,CCN2,CCNA2,CD59,CD99,CDC25B,CDK1,CDK4,CDKN1B,CHI3L1,CHRN4,CITED2,COL1A1,COL1A2,CRABP2,CRYAB,CRYBB1,CRYBB2,CRYBB3,CSNK2A1,CTH,CTSD,CYP26A1,CYP2B6,CYP7B1,DHCR24,DRD2,EGR1,ESR1,ESRRA,F3,FABP6,FAS,FDX1,FN1,FOS,FOSL1,FOXP3,GHR,GJD2,GNAS,HBB,HBEGF,HDAC1,HIF1A,HMOX1,HNF4A,HSD11B2,HSPA5,IFNGR1,IGFBP4,IL15,INSR,ITGAV,ITGB3,KRT19,KRT4,KRT81,LDLR,LHB,LIPA,LPL,LTB,MET,MMP1,MSH6,MST1R,MUC5B,MYBL2,NAB2,NCF2,NDRG1,NES,NFKB1,NFKBIA,NOS1,NOX5,NPPA,PARP1,PCK1,PDHX,PIM1,PKM,PRKCA,PRKCD,PROM1,PSIP1,PTCRA,PTTG1,PYY,RB1,ROBO4,RRAS,SERPINE2,SGK1,SLC22A4,SNCG,SOAT1,SOX2,SPP1,SPTB,STAT1,STAT3,TBXA2R,TERT,TFPI2,TGFB,R3,TGM1,THRB,TIMP1,TLR2,TNC,TNFSF10,TNNC1,TP53,TP73,TSPO,TUG1,TXNRD1,TYMS,UFD1,UGCG,VDR,VEGFA                                                                                         |
| D-glucose |        | chemical - endogenous mammalian   | -0,005 | 0,272  | 0,024 | 1,95E-14 | 3,10E-12 | ABCA1,ABCG1,ACAA1,ACACA,ACTN1,ADIPOQ,ADIPOR1,AKR1B1,ALDOA,ALDOB,ALDOC,ANXA1,ANXA3,APOB,APOC3,ARF4,ASNS,ASS1,ATF3,BAX,C3,CANX,CAP1,CAPZA2,CASP1,CASP3,CASQ2,CAT,CCL20,CCN2,CCNB1,CD59,CDK1,CDK4,CDKN1B,CLU,COL1A1,COL3A1,COL4A1,COX6A2,CPD,CTSV,CYBA,CYBB,DBI,DDIT3,DNAJC3,DUSP1,EGR1,ELOVL6,ENO1,FABP2,FAS,FBP1,FN1,FOS,FUT1,G6PC,GABARAPL1,GCGR,GCH1,GCK,GFPT1,GLUL,GPD1,GPI,GRN,HIF1A,HK1,HMOX1,HNF4A,HPRT1,HSPA5,IER2,INS,INSR,ITGA8,JUNB,KDEL2,LAMB1,LAMC1,LDLR,LEP,LPL,LY96,MCAM,MLXIPL,MMP1,MMP17,NAMPT,NEU1,NFE2L2,NOS2,NPHS1,NR4A1,NR4A3,OAT,ODC1,PARP1,PBK,PCK1,PKCK2,PCNA,PCSK1N,PDCC4,PDHX,PDIA3,PDIA4,PDIA6,PDYN,PFKP,PKLR,PKM,PLA2G6,PLIN3,PLK3,PNPLA3,PODXL,PON2,PPARA,PPARG,PPIB,PTGDS,PYCR1,RDH16,RGS2,RRM2,RTN3,S100A4,SEC61A1,SGK1,SHC1,SIRT2,SIRT3,SLC25A10,SLC2A4,SLC37A4,SLC39A6,SOD2,SPHK2,SPP1,SQSTM1,SSR1,SST,STUB1,TALDO1,TIMM17A,TIMP1,TKT,TLR2,TP53,TRPV4,TRPV5,TUBB4A,TXNRD1,UCP2,USO1,VAMP2,VAMP8,VCAM1,VEGFA,WARS1,WWP1,YARS1 |
| FOXO3     | -0,065 | transcription regulator Inhibited | -2,592 | -2,496 | 0,012 | 2,79E-14 | 4,35E-12 | AGFG1,AHR,ALDH3A1,ANXA1,ANXA3,AURKA,BAX,BECN1,BNIP3L,C1QA,CASP4,CASP8,CAT,CCN2,CCNB1,CCNB2,CDC20,CDK4,CDKN1B,CDKN1C,CDKN3,CLDN1,COL4A1,COL4A2,CTSV,DDIT3,DLGAP5,DNM1L,EGR1,ESR1,FN1,FOS,FOSB,FOXO1,FOXO4,FOXP3,GABARAPL1,GABRR2,GADD45A,GADD45B,GLUL,GSTM5,GTF2I,GYP,A,HIF1A,HTATIP2,IFIH1,IL10RB,IL13,IMPDH2,ITGB2,JAK1,JUNB,LCN2,MCAM,MCM2,MET,MTHFD2,MX1,MYO6,MYOD1,NAMPT,NCA PG2,NDRG1,NFKBIA,NOS2,OVOL1,PBK,PCNA,PECAM1,PIK3IP1,PLA2G2D,PPP1R15A,PRKCD,PTEN,PTPRB,PTPRC,PTTG1,RASA1,RTN3,RUVBL1,SAC3D1,SGK1,SH2B3,SH3GLB1,SLIT2,SNAI1,SOD2,SPTLC2,TIPIN,TNFSF10,TP53,URFAP1,USP2,USP7,VCAM1,VEGFA,VIM,ZWINT                                                                                                                                                                                                                                                                                                                                            |
| TP73      | -0,200 | transcription regulator           | -0,005 | 0,231  | 0,023 | 4,01E-14 | 6,02E-12 | ABCC1,ADAM10,AFP,AQP5,ATF3,ATG5,AURKA,B2M,BAX,BHLHE40,BID,BIRC2,BMP7,BTG2,C1R,C3,CASP1,CASP3,CASP4,CCN5,CCNA2,CCNB1,CD83,CDC20,CDC25B,CDK1,CDKN1B,CDKN1C,CDKN3,CKS2,CLIP3,CNTFR,COL18A1,COL1A1,COL5A2,CRYAB,CTH,CTSD,DDIT3,DHRS3,DIMT1,DRAM1,DTYMK,EGR1,ELOC,ERCC2,FAS,FDXR,FN1,FOXF1,G0S2,GADD45A,GRN,HAGH,HBEGF,HIF1A,HSPB8,HTATIP2,IGFBP4,IGSF3,IL7,IVL,KRT10,LYZ,MDK,MIR22HG,MPZL2,MUTYH,NFKB1,NRGN,NRP1,P2RX4,PERP,PIGF,PIK3R3,PLK2,PPL,PRL,PTEN,PTPN3,RAN,RB1,RBX1,ROBO4,S100A2,SERPINA3,SERPINE2,SERPING1,SFN,SNAI1,SPHK2,SPIRIT1,SPP1,STMN1,SYNE2,TAP1,TERT,THBS2,TIMP1,TNIN1,TP53,TP53I3,TP73,TRIM22,TRIM32,TSHZ2,TSPAN1,UBE2C,UBE2D1,ULK1,VDR,VEGFA,WARS2,YWHAB,ZMAT3                                                                                                                                                                                                                                                                             |

|         |       |                                   |        |       |       |          |          |                                                                                                                                                                                                                                                                                                                                                                                                                                                                                                                                                                                                                                                                                                                                                                                                                                                                                                                                                                     |
|---------|-------|-----------------------------------|--------|-------|-------|----------|----------|---------------------------------------------------------------------------------------------------------------------------------------------------------------------------------------------------------------------------------------------------------------------------------------------------------------------------------------------------------------------------------------------------------------------------------------------------------------------------------------------------------------------------------------------------------------------------------------------------------------------------------------------------------------------------------------------------------------------------------------------------------------------------------------------------------------------------------------------------------------------------------------------------------------------------------------------------------------------|
| SMARCA4 | 0,238 | transcription regulator           | 0,621  | 1,307 | 0,066 | 5,84E-14 | 8,61E-12 | A2M,ABCA1,ADAM15,ADGRG1,ADIPOQ,AFP,AGMAT,AGR2,AHR,ALB,ALDH1A3,ALDH2,ANGPTL2,APOA1,APOBEC3G,ARHGDI,ARL4C,ASCC1,ASNS,AZGP1,BNIP3L,C1orf105,CA14,CASP1,CASP3,CCN2,CCNA2,CD44,CD47,CD52,CD63,CD74,CDKN1B,COL1A1,CTSS,CYP26A1,CYP3A4,DCT,E,CM2,EFNB1,EGR1,ELOVL6,EMP3,ENO3,F3,FABP6,FADS3,FAS,FBP1,FHL2,FN1,FOS,FUT1,GADD45A,GADD45B,GADD45G,GBP1,GBJ5,GLI1,GNAI3,GSTP1,GULP1,HBB,HCLS1,HCP5,HEXB,HKDC1,HLA-B,HLA-C,HLA-DRA,HLA-E,HLA-F,HLA-J,HNF4A,HNMT,HPGD,HS3ST1,HY1,IFI16,IFI30,IFITM1,IFITM2,IGFBP4,IL13,IL1RAPL1,ITGA7,ITGAV,KHDRBS3,KIFBP,CLK3,LDB1,LGALS1,LUM,MAFF,MAPK1,MAPK13,MC4R,MC5R,MMP1,MMP7,MUC1,MYBPH,MYOG,NCALD,NR2F2,NRP1,PARVA,PCDH1,PERP,PLS1,PMEL,PPARG,PSG4,PSMB9,PTP4A2,RAB27A,RAB38,RAC2,RAD50,RBM4B,RBP1,RGS2,ROCK1,RRM2,S100A2,S100A6,SEL1L3,SEMA3B,SEMA7A,SERPINE2,SKAP2,SLC2A4,SMARCA4,SOC2,SPP1,SPRY2,ST6GALNAC4,TAOK3,TAP1,TBX2,TBX21,TLR2,TNFAIP8,TNFSF10,TNNC2,TNNT2,TP53,TPK1,TPM1,TRIM15,TSPAN13,TSPAN8,TUBB,TXNRD1,TYMS,UBD,VIM,WT1 |
| HGF     |       | growth factor                     | -0,093 | 0,460 | 0,055 | 6,54E-14 | 9,48E-12 | A2M,ABCC6,ABCG2,ACKR3,ADAMTS1,ADGRF5,ADGRG1,AFP,AHR,AIMP2,AKAP12,AKAP13,ANGPTL2,ARPC5,ASNS,ATF3,AURKA,BAG2,BIRC2,CA9,CALM1 (includes others),CASP1,CASP10,CASP8,CCN2,CD44,CDC20,CDC25B,CDK1,CDK4,CDKN1B,CDKN3,CHRN2,CITED2,CNTFR,COL1A1,COL1A2,COL3A1,COL4A1,COPB1,CRYAB,CSE1L,CYP2B6,DDIT3,DTYMK,DYNLL1,EGR1,EPCAM,ESM1,F3,FGF16,FN1,FOS,FOSB,FOSL1,G6PC,GRB10,GUCY1B1,HBE,GF,HK1,HMOX1,IGFBP4,IL13,IRF8,ISG15,ITGA6,ITGB8,KIT,LG,KRT19,LCN2,LDLR,LSM1,LTA,LY75,MAD2L1,MAP2K3,MC2,MCM5,MELK,MET,MID1,MMP1,MPC1,NAB2,NAMPT,NDC80,NES,NFKB1,NOS2,NR0B2,NR4A1,NR4A3,NRCAM,NRP1,OR7C2,ORC2,OSMR,PCK1,PCNA,PIM1,PLA2R1,PLOD1,PLXNA2,PRC1,PTPRF,PTTG1,RAB5A,RAC1,RAD50,RFC2,RGS2,RHOB,RIN1,SGK1,SLC19A2,SLC1A2,SNAI1,SNRN,P70,SOC2,SOD2,SPP1,SPRY2,ST14,TBXA2R,TIMP1,TP53,UBE2C,VCAM1,VDR,VEGFA,VIM,WT1,YWHAH                                                                                                                                                            |
| E2F1    |       | transcription regulator           | 0,531  | 0,934 | 0,047 | 7,83E-14 | 1,08E-11 | ABCG2,ACTR1A,ACTR3,ADIPOQ,ALG5,ALPL,AURKA,BAX,BECN1,BID,BUB3,CA2,CALM1 (includes others),CASP3,CASP6,CASP7,CASP8,CBX5,CBX7,CCNA2,CCNB1,CCNB2,CCT2,CD2AP,CD44,CDC20,CDC25B,CDK1,CDK4,CDKN1B,CDKN1C,CITED2,CLIC1,CRABP2,CRIP2,CRYAB,CSE1L,CSHL1,CTNBP1,CYB5A,CYP27B1,DDB2,DIT3,DLEU1,DNMT1,DUSP1,E2F4,ECT2,EED,EGR1,EI24,FAS,FHL1,FKBP3,FOS,FOXO1,GINS1,GM2,GRAMD4,H2AC8,HMGB2,HNRNP,HS11B2,HSP90B1,JPT1,KRAS,KRT10,LEP,LHX3,MAD2L1,MCM2,MCM3,MCM5,MFAP1,MMP1,MSH2,MYBL2,NDC80,NFKB1A,NMI,NRP1,OGA,PCLAF,PCNA,PCDC5,PKK4,PLK2,PPARG,PPP1R26,PPP1R8,PPT2,PSMB9,RAN,RB1,RBFOX2,REV3L,RFC2,RFC4,RFC5,RHOQ,RPA2,RPA3,RRM1,RRM2,RUVBL1,SMARCA5,SMC4,SOD2,STAM,STMN1,TAF9,TAP1,TAPBP,TERT,TGM1,TOP2B,TP53,TP53BP2,TP73,TXNRD1,TYMS,UCP2,ULK1,VCAM1,VEGFA,VIM,WEE1,WWOX,YARS1,YWHAH,ZFP36,ZNF22                                                                                                                                                                              |
| PML     |       | transcription regulator Activated | 2,164  | 2,205 | 0,005 | 8,82E-14 | 1,19E-11 | ACACA,ACACB,ACTG1,ADIPOQ,ANXA4,APOA1,BAX,CAT,CEBPE,CIAPIN1,CIT,DDX60,DNAJB6,DNAJB9,FABP1,FAS,GADD45A,HBB,HERC6,HLA-DMB,HLA-DRA,HMOX1,IFI35,IFI44,IFIH1,IFIT3,IFITM1,IRF7,ISG15,LDLR,LEP,LIPC,LPL,LYZ,MAFF,MAPK1,MX1,NDRG1,NFE2L2,OS1,PCBP2,PKK4,PLSCR1,PRKCA,PSMB8,PSMB9,RSU1,RXRA,SNAI1,SQSTM1,STAT1,STMN1,TAP1,TBX2,TP53,TPD52L2,TXNRD1,UBE2M,UCP2,VIM                                                                                                                                                                                                                                                                                                                                                                                                                                                                                                                                                                                                            |
| PAX3    |       | transcription regulator           | -0,055 | 0,045 | 0,036 | 9,23E-14 | 1,23E-11 | ALDH3A2,ANXA1,APP,ARC,ARHGDI,ASNS,ASS1,CAPN1,CD151,CDH3,CLU,COL1A2,CTSA,DBN1,DCT,DPEP1,DUSP2,F2RL1,F3,FHL1,FILIP1L,FKBP1A,FUBP1,GOS2,GLB1,GSTM5,GTF2H1,GUCY1A1,HARS1,HLA-DRB1,HPX,HTR6,IFITM2,IL6R,LRRC17,M6PR,MCAM,MEST,MET,MITF,MYOD1,MYOG,NNMT,P2RY4,PAK2,PCNA,PEA15,PIIB,PSME1,PTGER3,PTPN12,PTPN3,PXDN,RHOB,RLBP1,SFN,SOX10,SOX4,STX3,TFPI2,TIA1,TNC,TNNI1,TP53,TSPAN7,TYRO3,VCAN,YARS1,YWHAH                                                                                                                                                                                                                                                                                                                                                                                                                                                                                                                                                                  |

|        |        |                                   |           |        |        |        |          |          |                                                                                                                                                                                                                                                                                                                                                                                                                                                                                                                                                                                                                                                                                                 |
|--------|--------|-----------------------------------|-----------|--------|--------|--------|----------|----------|-------------------------------------------------------------------------------------------------------------------------------------------------------------------------------------------------------------------------------------------------------------------------------------------------------------------------------------------------------------------------------------------------------------------------------------------------------------------------------------------------------------------------------------------------------------------------------------------------------------------------------------------------------------------------------------------------|
| PGR    |        | ligand-dependent nuclear receptor |           | -0,799 | -0,365 | 0,050  | 1,33E-13 | 1,72E-11 | ABCG2,ADAMTS1,AKAP13,ALDH1A3,AP1G1,BIRC2,CAPN2,CCN5,CCNB1,CCNB2,CD44,CD59,CDC20,CDK1,CDKN1B,CDKN1C,CGA,CKAP4,COMT,CTSD,DPYSL2,DSCAM,DYNLL1,EFNA3,EIF5B,ELL2,ESR1,ESRRA,F2RL1,F3,FN1,FOS,FOXO1,G6PC,GAS6,GLUL,GRB10,GRIA3,HBEGF,HIF1A,HPGD,HSD11B2,ITGA6,KLF9,LAMB2,LHB,MAD2L1,MAP2K3,MUC1,MVP,NDRG1,NET1,NFKBIA,NSUN5,NT5C2,OCEL1,P2RX4,PCDH1,PCNA,PDLIM1,PFKP,PHF21A,PIP5K1B,PLK2,POSTN,PPARG,PIPF,PRL,RAP2C,RHOC,S100A6,SGK1,SM PDL3B,SNPH,SPRY2,ST3GAL4,STAT1,STAT3,STAT5A,STEAP1,TGFBI,TIPARP,TNC,TSC22D3,UGCG,VCAN,VDR                                                                                                                                                                     |
| TRIM24 | 0,412  | transcription regulator           | Inhibited | -4,504 | -4,964 | -0,074 | 3,42E-13 | 4,21E-11 | AGRN,BLNK,CA2,CNOT6,CYP24A1,DDX58,DDX60,FAM110B,FBN1,FLRT3,GBP2,GLUL,HERC6,HNF1B,IFI35,IFI44,IFIH1,IFIT2,IFIT3,IFNGR1,IFNGR2,IRF7,IRF9,ISG15,LGALS3BP,MYH10,NMI,OAS1,PARP12,PCLAF,PHF11,PSMB10,PSMB8,PSMB9,RTP4,SOCS2,SPP1,STAT1,TAP1,TGFBI,TLR2,TP53,TRPV5,VEGFA                                                                                                                                                                                                                                                                                                                                                                                                                               |
| PPARA  | -0,177 | ligand-dependent nuclear receptor |           | -0,646 | -0,441 | 0,021  | 3,95E-13 | 4,79E-11 | ABCA1,ACAA1,ACACA,ACAT1,ADAM10,ADIPOQ,AGXT,AHCY,ALDH2,ALDH3A2,ALDOB,ANXA2,APOA1,APOC3,APOM,APP,AQP8,ASNS,ASS1,AURKA,BAX,C1QA,C1QB,C1R,C1S,C2,C3,CA9,CAT,CCNA2,CCNB1,CD63,CDK1,CDK4,CFI,CIDEC,CSAD,CTH,CYBA,CYBB,CYP2B6,CYP2C8,CYP4A11,CYP7B1,DBI,DECR2,DIO1,DR1,DYNLL1,EI2,ELOVL6,F11R,FABP1,FABP2,FBXO21,FOS,FTCD,G0S2,G6PC,GCK,GLUD1,GLUL,GNMT,GPD1,GSTP1,H1-2,HADH,HIF1A,HLA-E,HMOX1,HNF4A,HPD,HPX,HSD17B4,IDI1,KHK,KIF20A,KYAT1,LPCAT3,LPL,MAD2L1,MASP2,MGLL,MGST3,MMD,MTNR1A,NCF2,NFE2L2,NFKB1,NFKBIA,NOS2,NPC1L1,NPPA,PAH,PBLD,PCK1,PCNA,PKK4,PKLR,PLTP,PNPLA2,PPA1,PPARA,PPARG,PPM1D,PRC1,PRL,QPCT,SARDH,SELENBP1,SLC10A2,SLC2A4,SMC4,SOCS2,TALDO1,TBX21,TERT,TLR2,TSPO,UCP2,VCAM1,VEGFA |
| SREBF1 | 0,122  | transcription regulator           |           | -0,119 | 0,303  | 0,056  | 4,45E-13 | 5,32E-11 | AACS,ABCA1,ACACA,ACACB,ADGRG1,ADIPOQ,AGMAT,ALDOA,ALDOC,ALOX12,ANKRD2,APOBEC3F,APOC3,ARF4,BAX,BEST1,BHLHE40,BHLHE41,CAP2,CCL17,CDK4,CFD,CFI,CSAD,CXADR,CYB5A,CYP27B1,CYP7B1,DARS1,DBI,ELOVL6,FABP6,FAS,FN1,FOXO1,G6PC,GCK,GLB1,HMOX1,HNF4A,HSPA5,IDI1,IFI30,INS,KLK3,LDLR,LEP,LPL,MAT1A,MDK,MYOD1,MYOG,NCF2,NFIL3,NOS2,NR0B2,OAT,PCK1,PCK2,PIK3R3,PKLR,PLA2G3,PLA2G6,PLS3,PLTP,PNPLA3,PPARG,PTGDS,RBP1,RNASET2,S100A13,SERPINA3,SLC22A4,SORBS3,SUCLG1,SV2A,TNNI1,TP53,UCP2,VEGFA                                                                                                                                                                                                                 |
| IL3    |        | cytokine                          |           | -1,527 | -1,180 | 0,056  | 4,84E-13 | 5,70E-11 | ALDH2,ALOX5AP,ARHGAP29,ARHGDB,ARHGEF1,BNIP3L,BTG2,C1QA,CASP3,CAT,CBFB,CCL17,CCT5,CD1A,CD48,CD53,CD63,CD83,CDKN1B,CIAPIN1,CISH,CITED2,CRAT,CSF3,CSNK1A1,CTLA4,DAD1,DDIT3,EGR1,EGR3,ELAVL3,EMP3,FAS,FKBP3,FOS,FUS,GADD45A,GADD45B,GADD45G,GNAS,GPR21,GZMA,HBEGF,HK1,HLA-A,HNF1A,HNF4A,HSP90B1,HSPA5,IK,IL13,IL17RB,IMPDH2,ITGAV,ITGB3,JUNB,KLF9,KPNB1,LCN2,LTA,LY75,LYN,MAN2B1,MCM5,MID1,MLF2,MMP1,NARS1,NRP1,ODC1,PDE1B,PIM1,PIWIL1,PLCB2,PRG2,PSMA5,PSMC4,PSME1,RAN,ARS1,RB1,RIDA,RPS19,SEMA7A,SERPINA3,SH3BP1,SOX4,SSBP1,STT3A,TARS1,TERT,TLR2,TNFSF10,TNK1,TYK2,UCP2,VCAM1,VEGFA,ZFAND5                                                                                                       |
| IFNA2  |        | cytokine                          | Activated | 5,646  | 6,144  | 0,066  | 5,22E-13 | 5,98E-11 | ALOX5,ANXA1,B2M,BAX,C1R,C1S,CBFB,CCDC92,CD70,CDKN1B,CISH,CYB5A,DAD1,DDX58,DDX60,DPP4,FAS,GBP1,GBP2,GNAS,HBEGF,HERC6,HIF1A,HLA-A,HLA-B,HLA-C,HLA-E,HSPA6,IFI16,IFI35,IFI44,IFIH1,IFIT2,IFIT3,IFIT5,IFITM1,IFITM2,IFNAR2,IL10RB,IRF7,IRF9,ISG15,KCNJ6,LAPTM4B,LGALS3BP,LYN,MET,MT1X,MX1,OAS1,PARP12,PHF11,PLAAT4,PLSCR1,PPP1CA,PSME1,PTTG1,RB1,SAMSN1,SOCS2,SP110,STAT1,TAP1,TBX21,TDRD7,TLR3,TNFRSF10D,TNFSF10,TP53,TRIM21,TRIM22,UBD,UBE2L6,VCAM1,VEGFA,ZRP1,ZC3HAV1                                                                                                                                                                                                                            |



|        |        |                                   |        |        |       |          |          |                                                                                                                                                                                                                                                                                                                                                                                                                                                                                                                                                                                                                                                                                                                 |
|--------|--------|-----------------------------------|--------|--------|-------|----------|----------|-----------------------------------------------------------------------------------------------------------------------------------------------------------------------------------------------------------------------------------------------------------------------------------------------------------------------------------------------------------------------------------------------------------------------------------------------------------------------------------------------------------------------------------------------------------------------------------------------------------------------------------------------------------------------------------------------------------------|
| EGR1   | -1,174 | transcription regulator           | -0,270 | 0,155  | 0,058 | 7,13E-13 | 7,95E-11 | ALOX5AP,APOA1,APP,ARC,ATF3,BAIAP2,BAX,CACNA1H,CASP3,CASP6,CASP7,CASP8,CD44,CDC20,CLU,COL1A1,COL1A2,CSHL1,CXCL6,EGR1,ELK1,F3,FAS,FN1,FOSL1,FOX3,GAD1,GADD45A,GADD45B,GLI1,GNAS,HBEGF,HIF1A,HMOX1,HPGD,IL13,IL6R,JUNB,JUND,LDLR,LHB,LYZ,ME1,MTNR1A,NAB2,NDRG1,NFKB1,NR4A1,PNPLA2,PPARG,PTEN,RB1,SGK1,SLC12A2,SNAI1,SOD2,SPP1,SYN1,TIMP1,TNFSF10,TP53,TP73,VCAM1,VEGFA                                                                                                                                                                                                                                                                                                                                             |
| NFE2L2 | 0,262  | transcription regulator Activated | 3,741  | 4,291  | 0,053 | 8,17E-13 | 8,99E-11 | ABCC1,ABCC3,ABCC4,ABCG2,ACTG1,AHR,ALAS1,ALDH3A1,ALDOA,ARF1,ATF3,BHMT,CA11,CAT,CCN2,CCT3,CFD,COL1A1,COL3A1,COL4A2,CTSD,CUL1,CXCL6,CYBB,DAD1,DCSTAMP,DDIT3,DDX50,DNAJB5,DNAJC3,DSTN,DYNLL1,EIF4G2,ELN,EPHX1,FABP1,FN1,GABRA2,GADD45G,GHR,GNG3,GSTA1,GSTA3,GSTM5,GSTP1,HAX1,HMOX1,HNF1A,HPRT1,HSP90B1,HTATIP2,IFNGR2,IFRD1,IL13,IMPDH1,KLK3,LPL,M6PR,MAFF,MAPK10,ME1,MGLL,MGST3,MST1R,NARS1,NCF2,NFE2L2,NOCT,NOS2,NR0B2,NSMF,NUCB2,OAT,P2RX4,PDIA3,PDIA4,PDIA6,PGD,PPARG,PPIB,PSMA1,PSMA4,PSMA5,PSMA6,PSMD1,PSMD14,PSMD7,PTPRB,PTPRO,RACK1,RAN,RARS1,RBBP7,RUVBL1,S100A13,SEC23A,SEC61A1,SERINC3,SERPINA3,SERPINA6,SHC1,SLC10A1,SLC38A3,SOD2,SQSTM1,TALDO1,TKT,TP53,TUB,TXNRD1,UBE2K,UBQLN2,USO1,USP14,VCAM1,VEGFA |
| FSH    |        | complex                           | -1,335 | -1,177 | 0,024 | 8,32E-13 | 9,03E-11 | ACTN1,ACTR2,ADAMTS1,ADGRG1,ADM,AHR,AKAP12,ALDH3A2,ALPL,ARL4C,ARL6IP5,ATP9A,BAG1,BECN1,BMPR1B,BNIP3L,BTG2,CAMK2G,CAP2,CASP4,CCN2,CDK14,CDKN1C,COL15A1,COL18A1,CSNK1A1,CTSV,CYFIP2,DHRS3,DHX15,DLX5,DNAJB9,DUSP1,ELL2,ESR1,FDX1,FDXR,FILIP1L,FOS,FOSB,FOSL1,FOXO1,GATA6,GBP1,GDE1,GDF9,GK,GNAS,GNB1,GNRH2,HSD3B2,IGFBP4,IL6R,INHA,JUNB,KIDINS220,KITLG,LDLR,LGALS1,LYPD3,MAP2K3,MAP4K4,MT1X,NR4A1,PCK1,PCNA,PDYN,PHKA2,PKM,PLA1A,PLIN3,PLK2,POP5,PPARA,PPIH,PPP1CB,PRKD1,PRKX,PSIP1,PSMD1,PTEN,PTPRF,RAB27A,RAB4A,RAB5A,RGS16,RGS7,RHOB,SGK1,SHBG,SMAD1,SMAD2,SMARCA4,SNAP23,SSTR2,STAT1,STK24,STX4,TFPI2,TGFB3,TIMP1,TNFRSF11B,TOB1,TP53,TPM1,TUBA1A,TYRO3,UBE2L3,VEGFA,WT1,ZNF324                               |
| FOXO1  | -0,278 | transcription regulator           | -0,211 | 0,117  | 0,036 | 1,13E-12 | 1,21E-10 | A2M,ACACA,ADIPOQ,ADIPOR1,AGXT,ALAS1,ALB,ALDOB,ANXA3,APOC3,APOM,BAX,BID,BLNK,C1QA,CA2,CASP6,CASP8,CAT,CCL20,CCN2,CCNA2,CCNB1,CCNB2,CD70,CDK1,CDKN1B,CDKN1C,CITED2,COL4A1,COL4A2,CTSV,DCSTAMP,DLGAP5,EGR1,ELOVL6,FABP2,FAS,FBXO21,FN1,FOS,FOSB,FOXO1,FOXP3,G6PC,GABARAPL1,GADD45A,GADD45B,GCK,GPD1,GPI,GRHPR,GZMA,HIF1A,HMOX1,HPD,HSPA5,IL10RB,IL15,IL18,INS,INSR,ITGAV,ITGB2,ITGB6,JUNB,KLK3,LEFTY2,LEP,LHB,LPL,MAVS,MB,MCM5,ME1,MFN1,MLXIPL,MMP1,MXI1,MYOG,NAMPT,OVOL1,PBK,PCK1,PCK2,PDCD1,PDK4,PIK3IP1,PKLR,PLA2G2D,PLSCR1,PNP,LA2,PPARG,PPP1R15A,PRC1,PRKCD,PRL,PSMB8,PTEN,PTPRB,PTPRC,RPIA,SEMA6D,SFN,SGK1,SLC25A24,SLC2A4,SOD2,SPRY2,SPTLC2,TBX21,TKT,TNFSF10,TNNC1,TP53,TSPQ,VCAM1                         |
| Akt    |        | group                             | 0,812  | 1,041  | 0,027 | 1,72E-12 | 1,82E-10 | A2M,ADIPOQ,ADM,AIMP2,ANKRD2,B4GALT5,BAX,BHLHE40,BID,BIRC2,BTG2,CAV3,CCN2,CD44,CDK4,CDKN1B,CDKN1C,COL3A1,CTSD,E2F4,ELK1,ESR1,F3,FAS,FN1,FOS,FOSL1,FOXO1,FOXP3,GCK,GLI1,HIF1A,HMOX1,HPGD,IL13,IL32,INSR,KCNA5,LCN2,LEP,LPL,MCAM,MT1X,MUC1,NDRG1,NES,NET1,NFE2L2,NFIL3,NFKB1,NFKBIA,NOS1,NOS2,NOTCH2,NPPA,NR0B2,PCK1,PCNA,PDK4,PEA15,PLG,PPARG,PSMD10,RB1,RHOB,RRM2,SEMA6D,SGK1,SLC1A2,SLC2A4,SNAI1,SOD2,SOX4,SPP1,TERT,THBS2,TIPARP,TLR2,TMED10,TNC,TNFSF10,TP53,VCAM1,VCAN,VEGFA,WT1                                                                                                                                                                                                                             |

|         |        |                                 |           |        |        |       |          |          |                                                                                                                                                                                                                                                                                                                                                                                                                                                                                                                                                                                                                                                                                                                                        |
|---------|--------|---------------------------------|-----------|--------|--------|-------|----------|----------|----------------------------------------------------------------------------------------------------------------------------------------------------------------------------------------------------------------------------------------------------------------------------------------------------------------------------------------------------------------------------------------------------------------------------------------------------------------------------------------------------------------------------------------------------------------------------------------------------------------------------------------------------------------------------------------------------------------------------------------|
| Insulin |        | group                           |           | 1,364  | 1,580  | 0,023 | 1,90E-12 | 1,96E-10 | ABCA1,ACACA,ACAT1,ADAM10,ADIPOQ,ADIPOR1,ALB,ALDOA,ALDOB,APLN,APOA1,APOM,APP,ATF3,AVP,BECN1,CANX,CCN2,CCNC,CCT2,CCT5,CCT6A,CCT8,CDK8,CDKN1B,CDX2,CIDEA,COL1A1,COL1A2,COL3A1,COL4A1,COX6A2,CRABP2,CSHL1,CTH,CYBB,DBI,DEFB1,DUSP1,EGR1,ELOVL6,FKBP8,FN1,FOS,FOSB,FOXC2,FOXO1,G6PC,GCK,GHRH,GRB10,GSTP1,HAP1,HIF1A,HMOX1,HNF1A,HSD3B2,HSP90B1,HSPA4,HSPA5,IFIT2,IFIT3,IGFALS,IGFBP4,INSR,IRF7,ITGB3,KLK3,LAMB1,LEP,LEPR,LGALS3BP,LPL,MAPT,MAT1A,ME1,MLXIP,NFIL3,NFKBIA,NOS2,NR4A1,NR4A3,NUCB2,ODC1,OGA,P4HB,PCK1,PCNA,PKC,PKD,PKD4,PER2,PKM,PLIN3,PNPLA2,PPARA,PPARG,PPIB,PPIC,PPP1R15A,PRKCA,PRKCD,PRL,PTEN,PTK2,RAC1,SGK1,SLC10A2,SLC2A4,SLC2A5,SLC37A4,SLC38A3,SLC5A5,SLC6A4,STAT1,STAT3,TBX21,TGFB,THBS2,TLR2,TNC,TRPV1,UCP2,VEGFA,VIM |
| PRL     | -0,273 | cytokine                        | Activated | 4,715  | 5,185  | 0,054 | 2,47E-12 | 2,49E-10 | A2M,ABCG2,ACTR3,ADAR,ANXA2,ANXA3,ANXA5,APP,B2M,BAG1,CAMK2N1,CAPN2,CCL20,CCNB1,CDK4,CISH,CLDN3,CLU,COL1A1,COL1A2,COL3A1,CPD,CTSA,CTSD,CTSS,CTSV,DDX58,EGF,EGR1,ELOC,ENO1,ESR1,FN1,FOS,HEP,RC6,HSD11B2,IFI35,IFI44,IFIH1,IFIT3,IFIT5,IFITM1,IGFALS,IRF7,IRF9,ISG15,KRT19,KRT31,LAMC1,MAGED1,MARS1,ME,MSN,NFKB1,NOS2,OAS1,ODC1,P4HB,PARP12,PCNA,PDIA4,PDIA5,PKC,PKD4,PIM1,PLSCR1,PRL,PSME1,RALB,SERPINA3,SLC10A1,SND1,SOCS2,SP110,SPP1,STAT1,STAT5A,TDRD7,TIMP1,TMEM140,TP53,TUBA1B,VDR,VIM,XDH                                                                                                                                                                                                                                           |
| Ins1    |        | other                           |           | -2,193 | -1,920 | 0,031 | 2,65E-12 | 2,63E-10 | ACACA,ADIPOQ,ADIPOR1,ALAD,ALAS1,ALB,AP2M1,APOA1,APOC3,ARF1,BCKDHA,CA14,CDKN1B,CFD,COL18A1,COL1A1,CRAT,CRYAB,CSHL1,CYB5A,DDIT3,DLX5,DYNLL1,E2F4,ECI2,EGR1,ELOVL6,FOS,FOXC2,G6PC,GAST,GCK,GPD1,GSK3A,GSTP1,HSD11B2,HSD17B4,IGFBP4,IMPDH2,INSR,ITGA6,JUNB,LDLR,LEP,LGALS3BP,LPL,MAPK1,MAPT,MLXIP,MMP1,MPZ,MYO10,MYOG,NGF,NOS1,NOS2,NPPA,NTF3,ODC1,PCK1,PCNA,PDIA2,PER1,PKLR,PPARA,PPARG,PPIB,PRKCA,PRL,PTEN,RHOA,RRM1,RRM2,RXRA,SLC28A1,SLC2A4,SLC37A4,SOCS2,SOD2,STAT3,STAT5A,STX4,TBX21,TIMP1,TTF2,UBE2D2,UGT8,VAMP2,VEGFA,VIM                                                                                                                                                                                                          |
| ethanol |        | chemical - endogenous mammalian |           | 0,968  | 1,185  | 0,022 | 3,98E-12 | 3,92E-10 | ABCA1,ABCG1,ACACA,ACKR3,ADIPOQ,ADIPOR1,ADM,ALDH1A3,ALOX15B,ALOX5,ANPEP,APOA1,ATF3,AVP,BAX,BHMT,CAPN1,CASP3,CAT,CCN2,CDKN1B,CHRNA6,CLU,COL1A2,COL3A1,CYP2A6 (includes others),CYP2B6,CYP2C8,CYP3A4,CYP3A5,CYP3A7,CYP4A11,DCT,DDIT3,DRD2,DUSP1,EGR1,EPHX1,ESR1,FAAH,FABP1,FABP2,FAS,FOS,FOSB,G6PC,GADD45A,GCK,GDE1,GHRH,GNAI1,GNAS,HIF1A,HLA-A,HMOX1,HSPB1,HSP90B1,HSPA5,HTATIP2,IL15,IRF7,LEP,LGALS1,MAPK8,MAT1A,MGST3,MLXIP,MME,MYCL,NCF2,NMI,NOS2,NPPA,PARP1,PCK1,PCNA,PDCD1,PDYN,PLK3,PNPLA2,PPARA,PPARG,PPP1R3C,PRL,PTEN,RBP1,RHOB,RORA,SEC23A,SGK1,SLC1A2,SNAI1,SOD2,STAT1,STAT3,TBP,TFPI2,TIMP1,TLR1,TLR2,TLR6,TP53,TSC22D3,VAMP2,VIM,WEE1                                                                                        |
| TCF4    | 0,083  | transcription regulator         |           | -0,900 | -0,699 | 0,023 | 4,68E-12 | 4,51E-10 | AMHR2,APOBEC3G,ARHGEF18,BAG2,BHLHE40,BMP7,CASP1,CASP3,CASP4,CASP8,CCN5,CCNA2,CCNB2,CCT6A,CD24,CDC20,CDC25B,CDH17,CDK1,CDKN1C,CDKN3,CKAP4,CKS2,CRELD2,CSF3,DCK,DCT,DDX58,DIIMT1,DPF2,DPY19S1,DSTN,EAF2,EPCAM,FAM111A,FAS,FGF1,FKBP8,FN1,FOS,FOXO1,GLI1,GP9,GRPEL1,HIF1A,HMGB2,HSP90B1,IFI16,IGFBP4,IL15,KCNN4,LEPROTL1,MAD2L1,MANF,MITF,MMP1,MVP,NDC80,NEIL1,NELL1,NOD1,NOS2,NOTCH2,OCA2,OTOR,PARP8,PDIA4,PDIA6,PIWIL1,PLK2,POP7,PPARG,PPIB,PPIH,PRC1,PRDX4,PTCRA,QTRT2,RHOC,RPS6KC1,RRM2,SACS,SDF2L1,SEC24D,SERPINB1,SGK1,SH3BP5,SH3GLB1,SMAD1,SMAD2,SMAGP,SORBS2,SP140L,SPP1,SQSTM1,STAT3,SUB1,TERT,TIA1,TMEM140,TMEM184B,TNFSF10,TRIM38,VCAN,WARS1,ZBP1,ZP2                                                                          |
| IRF1    | 0,232  | transcription regulator         | Activated | 5,083  | 5,496  | 0,060 | 8,50E-12 | 7,89E-10 | B2M,BAX,C1R,CASP1,CASP3,CASP7,CASP8,CCL20,CCNB1,CDK4,CFB,CTSS,CYBB,DDX58,EIF4A3,ERAP1,FGL2,FOXO3,GBP2,HLA-G,IFI35,IFIH1,IFIT2,IFIT3,IFIT5,IFITM1,IL13,IL15,IL18,IL7,IRF7,IRF9,ISG15,LTB,MAP4K4,MX1,NOS2,OAS1,ODC1,PCNA,PIGR,PLAAT4,PSMB10,PSMB8,PSMB9,PSME1,SLP1,SOCS7,SP110,STAT1,STAT3,TAP1,TAPBP,TERT,TLR3,TLR6,TNFSF10,TP53,TRIM21,TRIM22,UBD,VIM                                                                                                                                                                                                                                                                                                                                                                                  |

|        |        |                         |           |        |        |       |          |          |                                                                                                                                                                                                                                                                                                                                                                                                                                                                                                                                                                                                                                                                                               |
|--------|--------|-------------------------|-----------|--------|--------|-------|----------|----------|-----------------------------------------------------------------------------------------------------------------------------------------------------------------------------------------------------------------------------------------------------------------------------------------------------------------------------------------------------------------------------------------------------------------------------------------------------------------------------------------------------------------------------------------------------------------------------------------------------------------------------------------------------------------------------------------------|
| EGFR   |        | kinase                  |           | 1,132  | 1,479  | 0,036 | 1,06E-11 | 9,66E-10 | ABCG2,ABI1,ANXA1,BAX,BZW2,C12orf49,CAPZA2,CASP3,CASP4,CBX5,CCN2,CCNA2,CCT5,CD47,CDK1,CDK4,CDKN1B,CHI3L1,COL1A1,COL3A1,COL5A2,CRMP1,CRYAB,CUL1,DDIT3,DSG2,DUSP1,EGF,EGR1,EGR3,ELK1,ESR1,F2RL1,F3,FBN1,FOS,FOSL1,FOXP3,GADD45A,GAST,GBP1,GHR,GRN,HBEGF,HIF1A,HMGB3,HSD11B2,HSP90B1,HSPA5,IER2,IGFBP4,IL36A,ITGA6,JUNB,JUND,KCNN4,KLK3,KPNB1,LCN2,MACF1,MARCKS,MET,MME,MMP1,MUC1,MXI1,MYBL2,NFKBIA,NOS2,NPPA,NSF,ODC1,OSMR,PCNA,PDIA2,PKM,POSTN,PROM1,PSEN1,PTEN,QTRT2,RAI14,RB1,RBBP7,RCL1,RHOB,RRAS,S100A2,SDF2L1,SEMA7A,SERPINA3,SERPINE2,SLPI,SPRY2,STAT3,TM4SF5,TNC,TNFRSF11B,TPST1,TRMT2A,TUBB4A,VCAN,VDR,VEGFA,VIM,WEE1,WNT10B,WNT6,WNT7B                                                 |
| AGT    | 0,279  | growth factor           | Activated | 1,865  | 2,275  | 0,040 | 1,18E-11 | 1,05E-09 | ADIPOQ,ADIPOR1,ADM,ALOX12,ANXA1,ANXA3,ATF3,AVP,BAX,BECN1,CASP3,CASP8,CAT,CAV3,CCN2,CD44,CDK1,CDK4,CDKN1B,CIT,COL11A2,COL1A1,COL1A2,COL3A1,COL4A1,CRABP2,CTF1,CTSS,CYBA,CYBB,CYP11B2,CYP4A11,DRD5,DUSP1,EGR1,F3,FBXO21,FDX1,FDXR,FN1,FOS,FRTAT2,GCH1,GFPT1,GSTA3,GSTM5,GSTP1,HBEGF,HIF1A,HMGB2,HMOX1,HSD3B2,IDI1,IGFBP4,IL13,IL15,IL18,INSR,ITGA7,ITGAV,ITGB3,ITPKB,KITLG,KRAS,LAMB1,LDLR,LEP,LEPR,LIMD2,LPP,LTA,MAD2L1,MAPT,MMP1,MYH10,NAMPT,NCALD,NCF2,NDRG1,NGF,NMNAT2,NOS1,NOS2,NOTCH4,NOX5,NPHS1,NPPA,NR4A1,PARP1,PECAM1,PFN1,POSTN,PPARG,PPFIBP1,PPP1R3C,PSMB10,PSMB8,PTEN,RAC1,RGS2,RHOA,RRAS,SGK1,SHC1,SOD2,SOX4,SPP1,TBX2,TFPI,TIMP1,TLN2,TP53,UCP2,UGCG,VCAM1,VEGFA,VIM,ZFP36,ZNF268 |
| NFKBIA | -0,487 | transcription regulator |           | 0,182  | 0,403  | 0,022 | 1,31E-11 | 1,15E-09 | A2M,ACKR3,ALOX15B,ANKRD49,APOA1,AZGP1,BAX,BID,BIRC2,BPIFA1,BTG2,C3,CAPZA2,CASP4,CASP8,CCL20,CCNA2,CCNB1,CCNC,CDC25B,CDH3,CHI3L1,CLU,COL1A2,COL3A1,COL5A2,CRYAB,CSF3,CSK,CTNNA1,CTSF,CTS2,CXCL6,CYBA,CYP7B1,DDIT3,EIF4G2,ERAP1,ESM1,F3,FAS,FCGRT,FHL2,FN1,FOS,FOXC2,GADD45A,GADD45B,GADD45G,GBP2,GCH1,GM2A,GRN,GSTM5,HIF1A,HLA-A,HMOX1,HOXA10,HSPA5,IFI16,IL13,IL15,IRAK1,ISG15,ITGAV,JUNB,KCNN4,LCN2,MMP1,MSH2,MYOD1,NFKB1,NFKBIA,NFKBIE,NGF,NOCT,NOS2,NPPA,NR4A1,PCNA,PDHA1,PDIM1,PEA15,PICALM,PIM1,PRL,PTEN,PTP4A2,RAC1,RBP1,RGS16,ROCK1,RRM1,SCFD1,SERPINE2,SGK1,SLC12A2,SLC1A2,SOAT1,SOD2,TCEAL9,TCF12,TIMP1,TLR2,TMPO,TNC,TNFAIP8,TNFRSF11B,TNFSF10,TP53,VCAM1,VEGFA,YRCC5,YAP1,ZNF338   |
| ANGPT2 |        | growth factor           | Activated | 3,200  | 3,628  | 0,057 | 1,69E-11 | 1,41E-09 | ABCC1,ARL4C,BAG1,C1R,CASP3,CAT,CFB,COL1A1,COL1A2,COL3A1,COMT,CRYAB,CRYBB3,CYBA,CYBB,CYP11B2,DDIT3,EXT2,FAS,FN1,GATA6,HIF1A,HMOX1,HSPA4,HSPA5,INPP5F,KPNA2,LEP,LEPR,LYN,MAPK10,MMP1,MMP7,MYOD1,MYOG,NME1,NPHS1,NPPA,P4HB,PDCD4,PDIA3,PDIA5,PDIA6,PLG,POSTN,PPARA,PROS1,RFC2,RFC4,RHOB,RPA2,RPA3,SERPING1,SMYD5,SNAI1,SOC5,SOD2,ST13,THBS2,TLR3,TP53,UBE2A,VCAM1,VIM,YIPF5                                                                                                                                                                                                                                                                                                                      |
| ERK1/2 |        | group                   |           | -1,513 | -1,098 | 0,049 | 1,69E-11 | 1,41E-09 | ABCA1,ABCC6,ADIPOQ,ALOX5,ANKRD2,ATP1A3,AVP,B2M,BAX,BHMT,BIRC2,C3,CAT,CAV3,CCL20,CCL22,CCN2,CD44,CDK1,CDK4,CDKN1B,COL1A1,COL3A1,CTSV,CXCL6,CYBB,DDIT3,DUSP1,EGR1,ELK1,ENO1,ESR1,F3,FN1,FOS,FOSB,FOSL1,FOXO1,FZD1,GAD1,HBEGF,HIF1A,HLA-A,HPGD,HSPA5,INS,ITGB3,JUNB,JUND,KIF2A,LDLR,LEPR,MAP3K10,MAPK1,MAPT,MMP1,MUC5B,MYOG,NAMPT,NKX2-5,NOS2,NPPA,NR4A3,PCNA,PKM,POSTN,PRL,PSMB10,PSMB8,PSMB9,RAC1,RB1,RHOC,S100A6,SGK1,SLC12A6,SNAI1,SPP1,SPRY4,SSTR3,TAP1,TAPBP,TBP,TERT,TIMP1,VCAM1,VCAN,VEGFA                                                                                                                                                                                               |

|        |        |                                   |        |        |        |          |          |                                                                                                                                                                                                                                                                                                                                                                                                                                                                                                                                                                                                                                                                                                                      |
|--------|--------|-----------------------------------|--------|--------|--------|----------|----------|----------------------------------------------------------------------------------------------------------------------------------------------------------------------------------------------------------------------------------------------------------------------------------------------------------------------------------------------------------------------------------------------------------------------------------------------------------------------------------------------------------------------------------------------------------------------------------------------------------------------------------------------------------------------------------------------------------------------|
| CD40LG | -0,097 | cytokine                          | 1,264  | 1,786  | 0,066  | 2,51E-11 | 2,05E-09 | AHR,AKAP13,APOBEC3G,ARMC6,ASCC3,ATF3,B2M,BAX,BCAT2,BIRC2,CA2,CASP1,CAST,CBX3,CCL17,CCL20,CCL22,CCN2,CD44,CD63,CD70,CD83,CDC25B,CDKN1B,CHRM5,CLU,DUSP1,DUSP2,EGR1,F3,FAS,FOS,FOSB,FURIN,G0S2,GADD45A,GCH1,HIF1A,HLA-DQB1,IFI44,IFIT2,IFIT3,IFITM1,IL10RA,IL13RA1,IL15,ISG15,ITPA,JUNB,JUND,KIF2A,LMAN2,LTA,LTB,MAP2K3,MARCKS,MARCKSL1,MSH2,MX1,NAMPT,NET1,NFKB1,NFKBIA,NFKBIE,NOS2,NR4A3,PIM1,PLA2G4C,PREPL,PSMB10,PSMB8,PSMB9,PSME1,PTPN12,RAD50,RASA1,RB1,RGS2,RIDA,RNASE3,SAMSN1,SEMA4D,SERPINA10,SOD2,SPHK2,STAT1,STAT3,STAT5A,SWAP70,TAP1,TFAP4,TNFRSF11B,TNFRSF13B,TNFSF10,TNPO1,TP53,TPD52L2,TUBB,UBD,UC                                                                                                       |
| Pkc(s) |        | group                             | -1,460 | -1,133 | 0,046  | 2,61E-11 | 2,11E-09 | ABC1,ACAT1,ACO1,ADM,AHR,APOA1,APP,ATF3,CCN2,CDKN1B,CDX2,CGA,CLDN1,COL3A1,CYBB,CYP2A6 (includes others),DDIT3,DNAJC3,DUSP1,EGR1,F3,FAS,FGFBP1,FN1,FOS,FOSL1,GADD45A,GADD45B,HIF1A,HMOX1,HPGD,HS                                                                                                                                                                                                                                                                                                                                                                                                                                                                                                                       |
| STAT1  | 0,761  | transcription regulator Activated | 6,287  | 6,766  | 0,055  | 2,69E-11 | 2,12E-09 | CA,PER1,PER2,PLA2G6,PPARA,PPARG,PPP1R15A,PRKCA,PRL,RB1,RGS2,S100A1,SLC1A2,SLC6A4,SPP1,STC2,TGM1,TP73,VCAM1,VDR,VFGFA                                                                                                                                                                                                                                                                                                                                                                                                                                                                                                                                                                                                 |
| RARA   |        | ligand-dependent nuclear receptor | -0,083 | -0,085 | -0,000 | 2,70E-11 | 2,12E-09 | A2M,ABCA1,ALDH1A3,APOBEC3B,APOBEC3G,B2M,BAX,C1R,C1S,C3,CAPN1,CASP1,CASP3,CASP4,CASP6,CASP8,CCL20,CDKN1B,CFB,CLIC5,CTSS,CX3CR1,CYP2C8,CYP3A5,CYP4A11,DCSTAMP,DDX60,DPP4,EGR1,FAS,FCER1G,FGL2,FOS,FOXO1,FXP3,FURIN,GBP1,GBP2,GCK,HERC6,HIF1A,HLA-E,HTRA1,IFI16,IFI30,IFI35,IFI44,IFIH1,IFIT2,IFIT3,IFITM1,IFI                                                                                                                                                                                                                                                                                                                                                                                                          |
| CEBPA  | 0,005  | transcription regulator           | -1,568 | -1,317 | 0,027  | 2,74E-11 | 2,13E-09 | A2M,ACACA,ADH6,ADIPOQ,AKAP12,AKR1B1,AKR1C1/AKR1C2,ALB,ALOX5AP,ANPEP,ANXA1,APLNR,APOB,APOC3,AQP5,ARL4C,ARL6IP5,ASNS,ASS1,BHMT,BTG2,C3,CA2,CCL20,CCNA2,CCNB2,CDK4,CEBPE,CFD,CHI3L1,CKAP4,COL1A1,COL1A2,CRABP2,CSF3,CTNNA1,CYP2A6 (includes others),CYP2B6,CYP3A4,CYP3A5,CYP3A7,EDF1,EPHA7,EPHX1,FHL1,FOS,FOXO1,FZD1,G0S2,G6PC,GADD45A,GATA6,GBP1,GCH1,GLI1,GLRX,GP9,GSTP1,HDAC1,HLA-B,HMOX1,HNF1A,HNF1B,HPGD,HSPA5,IGFBP4,IL6R,INSR,ISG15,IVL,JUNB,KLK14,LCN2,LEP,LEPR,LGALS1,LPL,LTF,MALT1,MC1R,MYBL2,MYOD1,MYOG,NFIL3,NRP1,OVOL1,PCCK1,PCNA,PGD,PLOD2,PPARA,PPARG,PPL,PPP1R3C,PRL,PTPN3,PTPRC,RGS2,RIN1,RORA,SERPINB1,SERPINI1,SLC10A1,SLC2A4,SOD2,SPINT2,SPP1,SPRR3,THRB,TNFSF10,TSC22D3,UBE2I,VCAN,VDR,VLDLR,ZMIZ1 |

|      |        |                         |           |        |       |          |          |                                                                                                                                                                                                                                                                                                                                                                                                                                                                                                                                                                                                                                                                                                                                                                                                                                                                                                        |                                                                                                                                                                                                                                                                                                                                                                                                                                                                       |
|------|--------|-------------------------|-----------|--------|-------|----------|----------|--------------------------------------------------------------------------------------------------------------------------------------------------------------------------------------------------------------------------------------------------------------------------------------------------------------------------------------------------------------------------------------------------------------------------------------------------------------------------------------------------------------------------------------------------------------------------------------------------------------------------------------------------------------------------------------------------------------------------------------------------------------------------------------------------------------------------------------------------------------------------------------------------------|-----------------------------------------------------------------------------------------------------------------------------------------------------------------------------------------------------------------------------------------------------------------------------------------------------------------------------------------------------------------------------------------------------------------------------------------------------------------------|
| TP63 |        | transcription regulator | -0,357    | -0,067 | 0,034 | 2,95E-11 | 2,26E-09 | ACTL6A,ADA2,ADAMTS1,ADM,AGR2,AHR,ALDH1A3,ALOX12,ATG5,ATOH1,BAX,BECN1,BHLHE40,BMP7,CASP3,CAS T,CCNA2,CCNB1,CDK1,CDK18,CDKN1B,CDKN1C,CITED2,CKS2,CLDN3,COL4A1,CSTA,CTSD,CYP2A6 (includes others),DAP3,DD2,DNMT1,EFNA4,EI24,F3,FAS,FBN1,FDX R,FN1,FOS,FOSL1,FUBP1,FUT1,GADD45A,GCNT3,HAGH,HBEGF,HSPA4,IHH,INSR,ITGA7,ITGB8,IVL,JUNB,KHK,KLK3,KRT10,KRT31,LLGL1,LYN,MAD2L1,MAFF,MAP2K3,MAP4K4,MAPK8,MPZL2,PCNA,PERP,PIK3R3,PKLR,PKP2,POSTN,PPARA,PTEN,PTPN12,RAC2,RIN1,RPA1,S100A2,S100A4,SFN,SH2B3,SMAD2,SNAI1,SPINK4,SPRR3,TERT,TFF2,TIPIN,TNC,TNFAIP8,TNFSF10,TNS4,TP53,TP53I3,TP73,TPM1,TRIM29,ULK1,UPK1A,UPK2,VDR,VEGFA,VIM,WEE1,WFNCC2                                                                                                                                                                                                                                                               |                                                                                                                                                                                                                                                                                                                                                                                                                                                                       |
| IL13 | -0,261 | cytokine                | 0,067     | 0,389  | 0,034 | 4,14E-11 | 3,11E-09 | ABCA1,ACKR3,ADAM15,AOX5AP,ATF3,AVPI1,BAX,BID,BIRC2,BLVRA,BPIFA1,BZW2,C3,CA2,CAPN2,CASP1,CASP3,CASP6,CASP7,CASP8,CCL17,CCL20,CCL22,CCL25,CCN2,CD163,CD1A,CD1B,CD44,CD48,CD52,CFI,CHI3L1,CHN2,CISH,CLCA1,COL18A1,COL1A1,COL1A2,COL3A1,CTSS,CTSV,CXCL6,CYBB,DHCR24,DNASE2,EGR1,F3,FAS,FKBP1A,FOXO1,FXR,G0S2,GAS6,GP2,HK1,HMOX1,HTRA1,IFNGR1,IFNGR2,IL13,IL13RA1,IL17RB,IL18,IVL,JAK1,KITLG,LILRB3,LIPA,MCUR1,MMP1,MS4A4A,MT1X,MUC5B,MYOD1,MYOG,NHLH1,NOS2,PAPSS1,PFKP,PLA2G2D,POSTN,PPARG,RHOA,RORC,RYK,SAMSN1,SLC26A6,SLC7A7,SLPI,SPDEF,SPINT1,SPINT2,SPP1,ST14,ST3GAL6,SWAP70,SYNGR2,TIMP1,TLR1,TNFRSF11B,TNS1,TRPV1,TYRO3,VCAM1                                                                                                                                                                                                                                                                        |                                                                                                                                                                                                                                                                                                                                                                                                                                                                       |
| IL2  |        | cytokine                | 0,875     | 1,381  | 0,048 | 4,18E-11 | 3,11E-09 | ABCA1,ABCC1,AHR,ANXA1,APOBEC3G,ARHGAP12,ARHGAP32,ARHGEF18,AVP,BAG1,BAX,BHLHE40,C3,CACNA1E,CACNG3,CAMK2N1,CAPG,CASP1,CASP3,CASP4,CCL1,CCL17,CCL22,CCR4,CD44,CD47,CD5,CD58,CD59,CD74,CD83,CDK4,CDKN1B,CDKN1C,CHN2,CISH,CPD,CRMP1,CSF3,CTCF,CTLA4,CX3CR1,CYP2B6,DAPK2,DENND2D,DKKL1,DPP4,DRD5,DSG2,DUSP2,E2F4,EEF1E1,FAM13B,FAS,FCER1G,FGL2,FOS,FOXO1,FOXP3,GADD45B,GADD45G,GARS1,GNL3,GRN,GZMA,H1-2,HDAC1,HSP90B1,HSPA5,IDI1,IFNGR1,IFNGR2,IGFBP4,IL10RA,IL13,IL17RB,IL18,ITGA6,ITGAE,ITGB8,JAK1,JUND,LAPTM5,LDLR,LTA,LTB,MLLT3,MMD,MME,MMP25,MX1,NAB2,NCR3,NDRG1,NET1,NETO2,NFKB1,NME1,NMI,NOS2,NRGN,NRP1,PCNA,PDCD1,PDCD4,PDIA3,PEA15,PECAM1,PIK3R3,PIM1,PLA2G2D,PNP,POLE2,PPARG,PRKX,PROS1,PTPN3,PTPRC,PTRH2,RGS16,RGS2,RHOB,RHOC,RORC,RUFY1,RXRA,S100A4,SNAP23,SOCS2,SPP1,STAM,STAT3,STC2,SWAP70,TBX21,TGFBR3,TIMP1,TLR2,TNFAIP8,TNFRSF10D,TNFRSF11B,TNFRSF13B,TNFSF10,TP53,VEGFA,VIMWIP2,WIT4,YABC4 |                                                                                                                                                                                                                                                                                                                                                                                                                                                                       |
| LDL  |        | complex                 | Activated | 2,512  | 2,822 | 0,044    | 4,55E-11 | 3,35E-09                                                                                                                                                                                                                                                                                                                                                                                                                                                                                                                                                                                                                                                                                                                                                                                                                                                                                               | ABCA1,ABCG1,AP1G1,APOBEC3B,ATF3,C3,CAPN1,CAPN2,CASP1,CASP10,CASP3,CASP6,CASP7,CASP8,CCL20,CN2,CDK1,CX3CR1,CXCL6,CYBB,CYP11B2,CYP2C8,DDIT3,DNMT1,DUSP1,DUSP2,EGR1,EGR3,F3,FAS,FOS,FOSB,G0S2,GAS6,GJD2,GNAI1,GTF2I,HIF1A,HMOX1,HSP90B1,HSPA5,HSPA6,IFIT2,IFITM1,IGFBP4,IL10RA,IRF7,ITGAV,ITGB3,LASP1,LDLR,LTA,MMP1,MX1,NAMPT,NFKB1,NME1,NOS2,NROB2,NR4A1,NR4A3,PANX1,PARP1,PECAM1,PPARG,PTEN,PTPRF,RNASEH1,SHC1,SOD2,STAT3,TGFBR3,TNFSF10,TP53,VEGFA,VIMWIP2,WIT4,YABC4 |
| IL15 | 0,210  | cytokine                | 0,531     | 0,907  | 0,047 | 4,70E-11 | 3,43E-09 | AHR,ALDOA,ALDOC,ANXA1,APBA1,ARHGDI3,CALM1 (includes others),CAMK2G,CASP3,CCL17,CCN2,CD33,CD44,CD5,CD53,CD59,CD74,CD83,CDK2AP1,CDK4,CDKN1B,CISH,CKS2,COPB2,CSF3,CX3CR1,DPP4,ELK3,ELOC,ENO1,ENO3,EXOSC8,FAS,FBP1,FKBP1A,FOXP3,GARS1,GNAS,GNL2,GPI,HAT1,HK1,HMOX1,HNRNPF,IFI35,IFITM1,IL13,IL15,IL32,JUNB,LEP,LTA,LYN,MACROH2A1,MAPK1,MCM5,MLLT3,MX1,NCR3,NFKB1,NFKBIA,NME1,NOS2,PAFAH1B3,PCBP2,PCNA,PDCD1,PDCD4,PDCD5,PDIA3,PDIA4,PFKP,PFN1,PGD,PIK3R3,PIM1,PKM,PNP,PRDX4,PSMA5,PSMB10,PSMB8,PSMB9,PTP4A2,PTPRC,RAB8A,RAC2,RBX1,RGS16,RPIA,S100A11,SET,SMAD2,SOCS2,SYNPO,TALDO1,TBX21,TIGAR,TIMP1,TKT,TLR2,TNFSF10,TNNI1,TRIM5,TSPAN7,TXNRD1,TYROBP,VBP1,VCAM1,VDR,VEGFA,YARS1,ZFP36                                                                                                                                                                                                                     |                                                                                                                                                                                                                                                                                                                                                                                                                                                                       |

|          |        |                                   |        |        |        |          |          |                                                                                                                                                                                                                                                                                                                                                                                                                                                                                                                                                                                                                                                                                                                                                                                                                                                                                                                         |
|----------|--------|-----------------------------------|--------|--------|--------|----------|----------|-------------------------------------------------------------------------------------------------------------------------------------------------------------------------------------------------------------------------------------------------------------------------------------------------------------------------------------------------------------------------------------------------------------------------------------------------------------------------------------------------------------------------------------------------------------------------------------------------------------------------------------------------------------------------------------------------------------------------------------------------------------------------------------------------------------------------------------------------------------------------------------------------------------------------|
| THRB     | -0,175 | ligand-dependent nuclear receptor | 0,113  | 0,191  | 0,012  | 4,75E-11 | 3,44E-09 | ACACA,APOA1,APOC3,APOM,ATP1A3,BTG2,CASP1,CCL17,CCNB1,CDK4,CDKN1B,CFD,CGA,CSHL1,CSNK1A1,CTSD,CYP27B1,DAD1,DIO1,DR1,EGF,F12,FOS,FOSL1,FOXN1,FSTL1,FZD1,FZD6,G6PC,GCH1,HIF1A,IL7,KLF9,LDLR,LPL,LYZ,MAPK8,MC4R,ME1,MET,MLXIPL,MMP1,MMP7,NME1,NPPA,NR4A1,NRAS,NRGN,PAM,PCK1,PDK4,PER1,PGD,PHYH,PPARG,PRL,PROM1,PTGDS,PTTG1,SLC2A4,TGFBI,THRB,TP53,WIF1,WNT11,WNT2,WNT8B,YWHAE                                                                                                                                                                                                                                                                                                                                                                                                                                                                                                                                                |
| PTP4A1   | -0,116 | phosphatase                       | 0,758  | 0,889  | 0,020  | 9,85E-11 | 6,95E-09 | ACTN1,ACTR2,ACTR3,AHCY,ALDOA,ANXA5,BAX,C1orf21,COL15A1,CRK,CSNK2A1,ELAVL1,FKBP1A,FLRT1,GSTP1,HIF1A,HNF4A,HNRNPF,HRAS,HSPA6,IFI16,IMPDH2,ITGB8,MAP3K1,MAPK10,MAPK8,NCK1,NME1,NRAS,PCNA,PECAM1,PKM,PPA1,PPP1R12A,RAN,ROCK1,RUVBL1,SHC3,SPI                                                                                                                                                                                                                                                                                                                                                                                                                                                                                                                                                                                                                                                                                |
| P38 MAPK |        | group                             | -0,652 | -0,063 | 0,065  | 1,20E-10 | 8,34E-09 | NT2,STMN1,TKT,TMEM267,TP53,VCAN,VIM<br>ABCA1,ADIPOQ,ANXA5,AQP5,ASS1,ATF3,BAX,BNIP3L,CAV3,CCN2,CD44,CD70,CD83,CDX2,COL3A1,CSF3,CXCL6,CYBB,DDB2,DDIT3,DIO3,DUSP1,EGR1,ELK1,F3,FADD,FAS,FDXR,FN1,FOS,GBP1,HIF1A,HMOX1,HSPA5,HTRA1,IL13,IL32,IRF7,ITGAV,ITGB2,ITGB3,ITGB8,IVL,JUNB,KDEL3,KLF15,LEP,MAP4K4,MITF,MMP1,MSH2,MUC5B,MYBPH,MYOG,NFATC4,NFE2L2,NFKB1,NGF,NKX2-5,NOS2,NPPA,NR4A1,NR4A3,PCK1,PCNA,POSTN,PPARG,PPM1D,PTEN,PTPN12,RAB5A,RASA1,RB1,RBP1,RHOB,SATB2,SGK1,SLC5A5,SMAD2,SNAI1,STAT1,TBP,TBX21,TERT,TIMP1,TLR2,TNFSF10,TNNC1,TNNC2,TNNI1,TP53,TP53I3,I11K1,VCAM1,VDR,VGF,VI,DI,R7FP36,ZMAT3                                                                                                                                                                                                                                                                                                                 |
| BRCA1    |        | transcription regulator           | 1,789  | 1,956  | 0,024  | 1,22E-10 | 8,40E-09 | ALDH1A3,AQP5,BAX,CCNB1,CCNB2,CDH3,CDKN1B,COL18A1,CTSD,CTSF,CYP3A4,DDB2,DDIT3,DDX58,EGR1,ELAVL1,ESR1,FAS,FHL2,FOXO1,FXRD3,GADD45A,GADD45B,GT2H1,HBB,HMOX1,HSD11B2,IFIT2,IFIT3,IFITM1,IRF7,JAK1,KLK3,MAD2L1,MX1,NFE2L2,PCBP2,PCNA,PERP,PLSCR1,PLTP,PTEN,RB1,S100A2,SERPINE2,SFN,SNAI1,STAT1,STAT5A,TAP1,TBP,TERT,TP53,TP53I3,UBE2I,VCAN,VEGFA,VIM,WEE1                                                                                                                                                                                                                                                                                                                                                                                                                                                                                                                                                                    |
| XBP1     | 0,270  | transcription regulator Activated | 3,550  | 4,014  | 0,059  | 1,25E-10 | 8,55E-09 | ACACA,ACACB,ADAM10,AFP,APOA1,APP,ARFGAP3,ATG5,BECN1,BET1,CAT,COPB1,COPB2,CREB3L1,CRK,DAD1,DDIT3,DDOST,DERL1,DNAJB9,DNAJC10,DNAJC3,ESR1,FAS,FN1,GOLGA3,GOLPH3L,GORASP2,HLA-DRA,HMOX1,HSP90B1,HSPA5,INS,KDEL2,KDEL3,LMAN2,MGAT2,NOS2,NUCB2,P3H1,PDIA2,PDIA3,PDIA4,PDIA6,PGC,PPIB,RAB3A,RPN2,S100A6,SDF2L1,SEC11A,SEC23A,SEC23B,SEC24D,SEC61A1,SEC61B,SEC61G,SPCS3,SRP54,SSR1,STT3A,TFF2,TRAM1,USO1,VAMP2,VCAM1,WNT10B,YIF1A,YIPF5                                                                                                                                                                                                                                                                                                                                                                                                                                                                                         |
| IFNL1    |        | cytokine Activated                | 4,741  | 5,166  | 0,074  | 1,77E-10 | 1,18E-08 | ATF3,CD83,CHAC1,DDX58,DDX60,GBP1,HERC6,HLA-B,HLA-C,IFI35,IFI44,IFIH1,IFIT2,IFIT3,IFIT5,IFITM1,IFITM2,IL13,IRF9,ISG15,LGALS3BP,MX1,OAS1,PHF11,PLAAT4,PLSCR1,PSMB9,RTP4,SP110,STAT1,TDRD7,TLR2,TMEM140,TRIM22,UBE2L6,ZC3HAV1                                                                                                                                                                                                                                                                                                                                                                                                                                                                                                                                                                                                                                                                                              |
| PTEN     | 0,319  | phosphatase                       | 0,702  | 0,680  | -0,002 | 1,77E-10 | 1,18E-08 | ABCC4,ACAA1,ACACA,ADIPOQ,ADM,AGFG1,ALOX5AP,ANXA1,ARF4,ATF3,AURKA,BAX,BTG2,C3,CA2,CA8,CADM3,CASP7,CCNB1,CCNB2,CCNC,CD44,CDC20,CDK4,CDKN1B,CFD,CITED2,CKS2,CST6,CTSV,CTS2,CX3CR1,DENR,DHRS11,DNPH1,DUSP1,DYNC1L2,ECI2,EED,EGF,ESR1,F3,FAS,FGF1,FGF5,FN3K,FOS,FOXO1,FZD6,G0S2,GALK1,GMD5,GP9,GPR12,GPR162,GTF2I,HADH,HCLS1,HEXB,HGFA,C,HIF1A,HLA-DMA,HOXA10,IDH3B,IDI1,IFI30,IFNGR2,IFRD1,ISG15,JUND,KAT2A,KIAA0930,KIF3A,KRT19,LEPROT,LHPP,LMX1B,LRRFIP1,MACROH2A1,MAD2L1,MAPK8,MCAM,MET,MFAP3L,MME,MYBL2,MYO6,NDRG1,NEU1,NFIL3,NFKB1,NKX2-5,NME1,NOD1,NOS2,NPPA,NR2F2,NTSR2,PAPOLA,PARP1,PCBP2,PDCC4,PDHA1,PECAM1,PIM1,PITX3,PKLR,PLOD1,PPARG,PPP1R17,PRL,PTEN,PTP4A2,PTPRC,PTPRF,PTPRK,RAB38,RB1,RMI1,RNASEH1,RRM1,SEC23A,SERINC3,SMAD1,SMAD2,SMARCA4,SNAI1,SNRPF,SOAT1,SOX4,SP1,SPRY2,SQOR,SRSF10,STARD8,STAT3,STAT5A,STEAP1,SUCLG1,SYNCRIP,TNFRSF10D,TNFRSF11B,TNFSF10,TP53,TP53BP2,TRAM1,TSC22D3,TSPO2,VCAM1,VEGFA,X |

|             |        |                                   |           |        |        |          |          |                                                                                                                                                                                                                                                                                                                                                                                                                                                                                                                                                                                                                                                     |                                                                                                                                                                                                                                |
|-------------|--------|-----------------------------------|-----------|--------|--------|----------|----------|-----------------------------------------------------------------------------------------------------------------------------------------------------------------------------------------------------------------------------------------------------------------------------------------------------------------------------------------------------------------------------------------------------------------------------------------------------------------------------------------------------------------------------------------------------------------------------------------------------------------------------------------------------|--------------------------------------------------------------------------------------------------------------------------------------------------------------------------------------------------------------------------------|
| NR4A1       | -1,162 | ligand-dependent nuclear receptor | 0,916     | 0,910  | -0,001 | 1,85E-10 | 1,22E-08 | ACACA,ACO1,ADIPOQ,ADM,AKR1C1/AKR1C2,ALDOA,ALDOB,APOB,APOD,ATF3,CAV3,CDKN1B,COL1A1,COL1A2,C RABP2,DDIT3,ELK3,ENO1,ENO3,EPCAM,FBP1,FOXP3,G0 S2,G6PC,GCK,GPD1,GPI,GSK3A,GSTM5,HDAC1,HDAC6,H IF1A,HMOX1,HSD3B2,IL13,INS,ITGAE,KITLG,LDLR,LEP,LIP C,LPL,MAPK8,MARCKSL1,MMP7,MPZ,NDUFS6,NFKBIA,N R4A3,NUCB2,PCK1,PCK2,PCNA,PDCD1,PDHA1,PDIA3,PD K4,PHKB,PKLR,PPA1,PPARG,PPP1R3C,PRL,PTGDS,PTK2 ,PYGM,RPIA,RXRA,SLC2A4,SOAT1,SPINT2,SUCLG1,TALD O1,TNFSF10,UBE2C,UCP2,VCAM1                                                                                                                                                                                |                                                                                                                                                                                                                                |
| EDN1        | 0,125  | cytokine                          | -0,083    | 0,350  | 0,063  | 1,90E-10 | 1,24E-08 | ADIPOQ,ANXA1,ANXA4,ANXA5,AVP,BAG2,CCN2,CDK1,CD KN1B,COL1A2,COL4A1,CYBB,CYP11B2,DCT,EGR1,EIF3J, ENAH,FN1,FOS,FOSB,FOSL1,GAST,GRN,HAND1,HBEGF, HIF1A,HSPA5,IL18,INSR,ITGAV,ITGB3,IVL,JUNB,LEP,LEPR ,MARCKSL1,MCAM,MITF,MMP1,MMP7,MPRIIP,MSN,MYL6, NOX5,NPPA,ODC1,PDIA6,PLCB4,PLOD1,PPARA,PRKCA,PR KCD,PRL,RAB3A,SLC1A2,TIMP1,TNC,TP53,VCAM1,VCA N,VEGFA,VIM,YWHAE                                                                                                                                                                                                                                                                                     |                                                                                                                                                                                                                                |
| CEBPB       | -0,173 | transcription regulator           | 0,689     | 1,182  | 0,052  | 2,10E-10 | 1,37E-08 | ADIPOQ,ADM,ALB,ALDH1A1,ALOX5AP,APLN,POB,APO C3,APP,ASNS,ATR,BHMT,BLNK,C3,CCNA2,CCNB2,CDC25 B,CDH3,CDKN1B,CFD,COL1A1,COL1A2,COL5A2,CSF3,CY B5A,CYP24A1,CYP27B1,CYP2A6 (includes others),CYP3A4,DOB2,DDIT3,DHX9,DMWD,DYNLT1,EPHA7 ,FAS,FHL1,FHL2,FKBP6,FOS,FZD1,G6PC,GADD45A,GNAS ,GSTA1,H4C4,HBB,HLA-A,HPX,HSD17B4,HSD3B2,IDH3B,IGFBP4,IL7,INS,INSR,IRF 9,IVL,LAMC1,LCN2,LDLR,LEP,LEPR,LY96,LYN,MAPT,MCM 3,MMP1,MSH2,MYBL2,NOS2,NRP1,ODC1,PCK1,PCNA,PD K4,PEA15,PLG,PPARA,PPARG,PPP1R15A,PRG2,PRKCD, PRL,PSMA3,PSMA6,RAC2,RBBP7,RORA,SEC11A,SGK1,S LC10A1,SLC12A2,SMAD2,SPP1,SQOR,SRP54,SST,STAT3, TMEM50B,TP53,USP33,VCAN,VDR,VIM,VLDLR,XDH,ZNF6 38 |                                                                                                                                                                                                                                |
| TCF3        |        | transcription regulator           | -1,039    | -0,803 | 0,036  | 2,15E-10 | 1,39E-08 | ABCC8,ACACB,ADIPOQ,ARHGEF18,ATF3,ATOH1,AURKA, AZGP1,BID,BLNK,BTNL2,CA2,CASP3,CASP6,CCNA2,CCN B1,CCNB2,CD5,CDC20,CDC25B,CDK1,CDKN3,CKAP4,CK S2,COL1A1,CRELD2,CTSV,DCK,DDX58,DSTN,E2F4,EAF2, ECT2,EPB42,EPCAM,FOXO1,FOXP3,GADD45A,GADD45B, GM2A,GYP A,HAND1,HMGB2,HS3ST1,HSD17B14,HSP90B1 ,IFI16,INS,INTS13,JUND,KCNN4,LEPROTL1,MAD2L1,MANF ,MYOD1,MYOG,NDC80,NEIL1,NELL1,NFIL3,NPPA,NR0B2, NR4A3,PAFAH1B3,PARP8,PDIA4,PDIA6,PFKP,PRC1,PRDX 4,PRSS3,PTCRA,PTPRU,RGS16,RORA,RORC,RRM2,SCN 4A,SDF2L1,SEC24D,SEMA3G,SERPINB1,SLC12A2,SMAGP ,SUB1,SULT2B1,TCEAL9,TMEM184B,TYMS,ZBP1,ZP2                                                                   |                                                                                                                                                                                                                                |
| Rxr         |        | group                             | -0,678    | -0,616 | 0,018  | 2,80E-10 | 1,78E-08 | ABCA1,ADAM10,ALAS1,BMP7,BTG2,C1QA,CEBPE,CRABP 1,CSF3,CSHL1,CTSS,CYP24A1,CYP26A1,CYP2B6,CYP2C8 ,CYP3A4,CYP3A5,DIO1,EMX1,FABP6,FURIN,GADD45A,GS TA1,HBEGF,HNF1B,HR,INSR,ITGB2,LEP,LTF,MMP1,NOS2, NR0B2,PCK1,PK4,PLTP,PPARG,PTPRO,RXRA,SEMA4D, SLC10A1,SPP1,TERT                                                                                                                                                                                                                                                                                                                                                                                       |                                                                                                                                                                                                                                |
| bisphenol A |        | chemical - endogenous mammalian   | 1,408     | 1,715  | 0,046  | 2,82E-10 | 1,78E-08 | ADIPOQ,ALAS1,APOB,AQP5,BAX,BECN1,C3,CASP3,CCN2 ,CDK4,CDKN1B,CFD,CITED2,CLU,CTSD,DNM1L,EGR1,EL AC2,ENO1,ESR1,F11R,FABP2,FOS,GHRH,HOXA10,HSP90 B1,LCN2,LEP,NMD3,NR4A1,NR4A3,PCNA,PICALM,PKM,P OSTN,PPARG,PPP1R10,PRL,RBM22,RBM4B,RBPMS,RPH 3A,RPN2,SLC22A6,SLC2A4,SLC6A4,SLFN12,SRD5A2,STA T3,SYN1,SYNCRIP,TP53,TRA2A,TWF2                                                                                                                                                                                                                                                                                                                            |                                                                                                                                                                                                                                |
| lfnar       |        | group                             | Activated | 4,755  | 5,206  | 0,075    | 2,88E-10 | 1,80E-08                                                                                                                                                                                                                                                                                                                                                                                                                                                                                                                                                                                                                                            | APOBEC3B,B2M,C3,CASP1,CCL22,CD74,DDIT3,DDX58,FC ER1G,GBP2,HLA-A,HLA-E,HLA-G,IFI16,IFI35,IFIH1,IFIT2,IFIT3,IFNGR1,IL15,IRF7,IRF8,IRF9, ISG15,OAS1,PSMB8,PSMB9,SPP1,STAT1,TAP1,TAPBP,TL R2,TLR3,TNFSF10,TRIM21,UBE2L6,VCAM1,ZBP1 |
| IL5         |        | cytokine                          | 0,626     | 1,299  | 0,076  | 2,95E-10 | 1,83E-08 | A2M,ALDOA,ALDOC,ANXA2,ASNS,ASS1,BIRC2,BNIP3L,CA SP4,CCL22,CD24,CD5,CD63,CDC123,CISH,CITED2,CKAP4 ,CRELD2,CX3CR1,EAF2,EGR1,EGR3,ELL2,ENO1,FAS,FGL 2,GADD45A,GADD45G,GALK1,GBP2,GK,HBEGF,HIF1A,HS P90B1,HSPA5,HSPA6,IDI1,IER2,IFI30,IL13,IL13RA1,IL6R,IR F7,ITGAV,ITGB6,LTA,LTB,LUM,MANF,MMD,NDRG1,NFIL3, NOS2,P4HA1,PDOD2,PDIA6,PDLIM1,PFKP,PIM1,PKM,PIIF ,PRDX4,PRRC2A,PTPRC,PYCR1,RBPMS,S100A4,S100A6, SDF2L1,SEMA4A,SGK1,SNAP23,SOCS2,SRI,STK39,TLR1, TRA2A,UCHL3,UPB1,VIM,ZBTB32                                                                                                                                                                 |                                                                                                                                                                                                                                |

|                  |       |                         |           |        |        |        |          |          |                                                                                                                                                                                                                                                                                                                                                                                                                                                                                                                                                                                                                                                   |
|------------------|-------|-------------------------|-----------|--------|--------|--------|----------|----------|---------------------------------------------------------------------------------------------------------------------------------------------------------------------------------------------------------------------------------------------------------------------------------------------------------------------------------------------------------------------------------------------------------------------------------------------------------------------------------------------------------------------------------------------------------------------------------------------------------------------------------------------------|
| NRAS             | 0,370 | enzyme                  | Inhibited | -2,180 | -2,367 | -0,030 | 3,15E-10 | 1,94E-08 | AGRN,AKAP12,ANXA4,B2M,BAX,BUB3,CCNB1,CCNB2,CD48,CDC20,CDKN3,COL1A2,CRABP2,CX3CR1,CYBB,DLX5,DUSP2,EGR1,ELK1,EPHX1,FHL1,FN1,GBP2,HIF1A,HLA-A,HOMER3,HTRA1,IFI16,IFI35,IFIH1,IL13RA1,ISG15,KRAS,LCN2,LGALS1,MCM3,MEST,MITF,MYBL2,NCF2,NPPA,NRAS,P3H4,PERP,PLTP,PSMB8,RBPMS,RHOB,RNASE6,SARDH,SERPINE2,SLC2A4,STAT1,STAT3,TAP1,TMEM43,UBE2C,VEGFA,WEE1,XPNPPEP2,YIF1A                                                                                                                                                                                                                                                                                 |
| FAS              | 0,557 | transmembrane receptor  |           | -1,068 | -1,096 | -0,005 | 3,73E-10 | 2,20E-08 | ANXA2,ARAP2,ARHGFE1,BAX,BID,BIRC2,BTN3A3,CAMK2G,CASP3,CASP8,CAST,CCL20,CCN2,CD44,CD48,CD59,CD83,CDIPT,CDKN1B,CEACAM4,CLTB,COL15A1,COL18A1,COL1A1,COL1A2,COL3A1,COL4A1,COL4A2,COL6A3,CXCL6,DGKZ,EGR1,F2RL1,F3,FADD,FAS,FBN1,FGL2,FOS,FOSB,FOXO1,GADD45G,GBP1,GBP2,GDE1,GNG7,GRIA3,HLA-DQB1,HLA-F,IL10RA,IL13RA1,IL18,ITGA7,ITGAV,ITGB8,JUND,LDLR,LTB,LUM,LY75,MAP4K4,MET,MME,MMP1,MPZL1,NFKBIA,NFKBIE,NOS2,NR4A1,P2RX4,PAK2,PECAM1,PLD2,PPP1R15A,PTP4A2,PVALB,RASA1,SHC1,SIT1,SLPI,SOD2,SPP1,STAMBP,STK38,TLN2,TLR2,TNC,TNFRSF11B,TNFSF10,TP53BP1,TPM1,TWF2,TYK2,UGCG,VCAM1,VEGFA,VRK2,ZFP36                                                       |
| ERK              |       | group                   |           | 0,791  | 1,168  | 0,050  | 4,89E-10 | 2,84E-08 | ABCA1,ACTN1,ADAM10,APOBEC3G,ARPC2,BAX,BECN1,BTG2,CCN2,CDK4,CDKN1B,CGA,CKS2,CLU,COL1A1,COL3A1,CXCL6,DIO3,DPYSL2,DUSP1,E2F4,EGR1,ESR1,ESRRA,FAS,FN1,FOS,FOSL1,FOXO1,FOXP3,GDF9,GK,HBEGF,HMOX1,IFNAR2,ITGAV,ITGB2,ITGB3,JUNB,KYNU,LAMB1,LCN2,LDLR,MAFF,MAP4K4,MCAM,MMP1,MUC1,NDRG1,NFE2L2,ODC1,OSBP10,PKD4,PECAM1,PIWIL1,ROCK1,RORC,SNF,SOX4,STAT1,STMN4,TBX21,TERT,TIMP1,TNFAIP8,TP53,TUBA1A,UGCG,VCAN,VEGFA,ZFP36                                                                                                                                                                                                                                  |
| Interferon alpha |       | group                   | Activated | 4,948  | 5,427  | 0,051  | 5,19E-10 | 3,00E-08 | ADA2,ADAR,AFP,ANXA5,APOBEC3B,APOBEC3F,APOBEC3G,ATF3,B2M,BTG2,C3,CASP1,CASP3,CASP8,CCL22,CD70,CD81,CD83,CDKN1B,CISH,CLTCL1,CTH,CYP3A4,DDX58,DEFB1,DYNLT1,E2F4,EMID1,F3,FAS,FOS,GBP1,GBP2,GLI1,HERC6,HLA-A,HLA-B,HLA-C,HLA-F,HLA-G,IFI16,IFI35,IFI44,IFIH1,IFIT2,IFIT3,IFITM1,IFITM2,IFNAR2,IGFBP4,IL10RA,IL13,IL15,IL32,IL6R,IL7,INSR,IRF7,IRF8,IRF9,ISG15,JAK1,MX1,MYLIP,NCR3,NFIL3,NFKBIA,NMI,NOS2,OSAS1,PARP12,PHF11,PIM1,PLAAT4,PLSCR1,PRL,PSMB8,PSMB9,RB1,RBX1,RTP4,SERPINB1,SLC6A4,SOCS2,SP110,SPRY1,SPRY2,SPRY4,STAT1,STAT3,TAP1,TAPBP,TBX21,TDRD7,TERT,TGM1,TLR1,TLR2,TLR3,TMEM140,TNFSF10,TRIM21,TRIM22,TRIM5,TRIOBP,TYMS,UBE2L6,VCAM1,WA |
| HIF1A            | 0,522 | transcription regulator |           | 0,234  | 0,742  | 0,056  | 6,04E-10 | 3,46E-08 | ABCC8,ACO1,ADAM10,ADAM15,ADAMTS1,ADIPOQ,ADM,AFP,AKAP12,ALDOA,ALDOC,ALOX5AP,ARPC2,ASNS,AURKA,BAX,BHLHE40,BHLHE41,BID,BIRC2,BNIP3L,CA9,CCN2,CD24,CD44,CD70,CDKN1B,CITED2,CLDN1,CTSD,CYB5A,EED,EIF4G1,ENO1,ESRRG,FHL1,FHL2,FHL3,FN1,FOS,FURIN,FUT7,GADD45B,GATA6,GCK,GHR,GPI,H1-2,H2BC12,HIF1A,HMOX1,HSPA4,HSPA5,IL15,ITGAV,ITGB2,ITGB3,KITLG,KLHL20,KRT19,LEP,LGALS1,MAFF,MANF,MB,MET,MITF,MMP1,MMP7,MST1R,MUC1,NAE1,NBN,NDRG1,NOS2,NPPA,NR4A1,NR4A3,P4HA1,PDHA1,PKM,PLOD2,PPARA,PRKCA,PROM1,PTEN,RORC,SIRT2,SLC2A4,SNAI1,SOD2,SSBP1,STAT3,STC2,TERT,TLR2,TLR6,TMPRSS6,TNFRSF11B,TP53,TRIM21,VCAM1,VEGFA,VIM,WNT10B,WT1,ZNF267                      |



|     |        |                                   |           |        |        |        |          |          |                                                                                                                                                                                                                                                                                                                                                                                                                                                                                                                                                                                                                                                                                                                                                                                                                                                                                                                                                                                                                                                                                                                                             |
|-----|--------|-----------------------------------|-----------|--------|--------|--------|----------|----------|---------------------------------------------------------------------------------------------------------------------------------------------------------------------------------------------------------------------------------------------------------------------------------------------------------------------------------------------------------------------------------------------------------------------------------------------------------------------------------------------------------------------------------------------------------------------------------------------------------------------------------------------------------------------------------------------------------------------------------------------------------------------------------------------------------------------------------------------------------------------------------------------------------------------------------------------------------------------------------------------------------------------------------------------------------------------------------------------------------------------------------------------|
| APP | 0,227  | other                             | Activated | 1,961  | 2,233  | 0,028  | 6,18E-10 | 3,52E-08 | ABCA1,ABCG1,ABCG2,ABL1,ACTG1,ALB,ALDOA,ALDOC,AMPH,ANXA5,APP,ARC,ARF4,ARL6IP5,ASCC1,ATF1,ATP1A3,ATP4A,AXIN1,BAX,C1R,C1S,C3,CALML3,CANX,CAP1,CAPN1,CASP3,CAST,CAT,CCL20,CCN2,CD151,CD44,CD59,CD74,CDH3,CDK1,CDK4,CITED2,CLDN1,CLIC1,CLTB,CLU,COL18A1,CPNE6,CRABP1,CRABP2,CRK,CRYL1,CSF3,CSNK2A1,CTSD,CTSV,CXCL6,CYBB,CYFIP1,CYFIP2,DBI,DBN1,DDX58,DNM1L,DPYSL2,DRD2,DSTN,EGR1,ELN,ENO1,ERMP1,ESR1,EXT1,F2RL1,FKBP1A,FN1,FOS,FOSB,FUZ,FZD1,GALK1,GBP2,GHR,GNB1,GPI,GSTP1,HAP1,HARS1,HADC1,HECW1,HERC6,HK1,HLA-E,HMOX1,HSPA5,IFI16,IFI35,IFIH1,IFIT2,IL13,IL15,IL18,IL7,INR,INSR,IRF7,ITGA6,ITGB3,JUNB,JUND,KAT2A,KIF2A,KLK3,KPNB1,KYNU,LDLR,MAFF,MAPK1,MAPT,MBD4,MDK,MGAT3,MME,MMP1,MX11,NAMPT,NDUFS6,NES,NEUROG1,NFKB1,NME1,NNAT,NOS1,NOS2,NPTX1,NRP1,NTF3,PAK3,PDCD4,PKD2,PEA15,PFKP,PITX3,PJA1,PKM,PPARG,PRKCA,PSEN1,PSME1,PTCH2,PTGDS,PTPRC,PVALB,RAN,RFC4,RHOA,ROCK1,RTP4,SET,SH3GL2,SHC1,SLC13A3,SLC1A2,SLIT2,SMARCA4,SOD2,SQSTM1,STAT3,STMN1,STUB1,SUCLG1,SYN1,TAF9,TERT,TLR2,TLR3, TNFSF10, TOP2B, TOR3A, TP53, TP73, TPD52L1, TPM1, TRIM21, TUBA1A, TUBA1B, TUBB, TUBB6, UBE2K, UCHL1, VAMP2, VCAM1, VCAN, VEGFA, VIM, WEE1, WT1, ZR1 |
| AR  | -0,026 | ligand-dependent nuclear receptor |           | 0,044  | 0,489  | 0,050  | 6,86E-10 | 3,88E-08 | ABCA1,ABCC4,ABCG1,ACTR3,ADGRA3,ADM,ALDH1A1,ALOX15B,AMHR2,AQP8,ATP1A3,ATP4A,AZGP1,C3,CA5B,CA7,CADM3,CALU,CAMK2A,CASQ2,CAST,CAV2,CCDC70,CCNA2,CCT3,CDC25B,CDK14,CEND1,CGA,CIT,CKAP4,CLCN1,CLDN11,CLDN3,COL3A1,CTSO,DBI,DCTPP1,DHCR24,DNAJB9,DNM1L,DR1,DSG2,EGR1,EPHX1,EPPIN,ESPL1,FXD3,GAS6,GDF9,GPD1,GPX5,GSTP1,GUCY1A1,HOPX,HSD3B2,HSPA5,IMPDH2,INHA,ITGA6,KDEL2,KITLG,KLK3,KPNA2,MAD2L1,MCM2,MME,MRAS,MT1X,MTHFD2,MUC1,MYO1,MYOG,NDRG1,ODC1,P4HA1,PBK,PCSK1N,PDIA5,PDYN,PER1,PGC,PIGR,PIP,PLOD2,PLS3,PRKCA,PRKCD,PROS1,PTEN,PTGDS,RARRES1,RHBG,RHOB,SCN4A,SEC61B,SERPINA3,SGK1,SHBG,SLC22A4,SLC43A1,SNAI1,SPP1,SRD5A2,STAT1,STK39,TERT,TMPRSS2, TNFSF10, TNNT2, TPD52L1, TSPAN8, UBE2C, VCAN, VEGFA, VIM, WEE1, WT1, ZR1                                                                                                                                                                                                                                                                                                                                                                                                                   |
| OGA | 0,233  | enzyme                            |           | 0,775  | 0,699  | -0,007 | 7,23E-10 | 4,06E-08 | ABLM1,ACTG1,ADIPOQ,ALDOC,ALOX5AP,APOBEC3G,ARHGAP29,ASS1,AZGP1,BAX,C1QA,C1QB,C1RL,C6orf15,CAPN1,CASP1,CASQ2,CAVIN2,CCL20,CD151,CD24,CD44,CD47,CD48,CD53,CDH15,CIAPIN1,CLDN1,COLEC11,CRABP1,CX3CR1,CXCL6,CYFIP2,CYP2B6,DPEP1,EFNB1,ELK1,EPHB3,FAS,FBP1,FERMT2,FGF5,FGFBP1,FN1,FSCN3,FZD6,GABRA2,GADD45A,GADD45G,GALNT7,GAS6,GLI3,GLUL,GP9,GPR21,GTF2IRD1,HPGD,IFIT3,IFNGR2,IGFBP4,IL18,IL6R,ITPKB,JAK1,KRT81,LAMB1,LEP,LIPC,MCAM,MGLL,NDUFA2,NOTCH2,NPHS1,PDCC2,PDHA1,PHKA2,PHKB,PLCE1,PLIN3,PRDX4,PRKAR1B,PROM1,PTGDS,RAB27A,RB1,RHOB,S100A2,S100A6,SERPINE2,SOC2,SRPK3,ST14,STAT1,TBP,TGFB1,TGFB3,TIMP1,TNC,TNFRSF11B,TP53,TP53BP1,TP73,TPD52L1,TUBA1A,VIM,WNT11                                                                                                                                                                                                                                                                                                                                                                                                                                                                            |
| LEP | -0,132 | growth factor                     |           | -1,740 | -1,437 | 0,032  | 7,55E-10 | 4,19E-08 | ABCC3,ACACA,ACAT1,ACO1,ADIPOQ,AKR1C1/AKR1C2,ALDOB,APOA1,APOH,APOM,APP,ASS1,BAX,BID,CASP10,CASP3,CASP6,CASP7,CCNA2,CD63,CDKN1B,CEL,CFD,COL1A1,COL3A1,COL4A1,CSF3,CSHL1,CTSV,CYB5A,CYBA,CYBB,CYP24A1,CYP27B1,CYP2C8,CYP3A5,CYP4A11,DGKZ,DRD2,EGR1,ELOVL6,ESR1,F3,FAAH,FADD,FAS,FDX1,FOXS,FOXP3,G6PC,GADD45A,GCK,GNAS,GSTA3,HPX,HSPA5,IL13,INS,JUNB,JUND,KIF3A,LDLR,LEP,LEPR,LIPA,LIPC,LP L,MLXIP1,MMP1,MMP7,MUC5B,MYO1,MYOG,NAMPT,NC F2,NEUROG1,NOS1,NOS2,NPPA,P2RX4,PCK1,PCNA,PECAM1,PER2,PNPLA2,PPARA,PPARG,PPP1CA,PRL,RAC1,RORC,SLC13A2,SLC2A4,SOD2,SPP1,SST,STAT3,SYN1,TE RT,TIMP1, TMED9, TNFRSF11B, TNFSF10, TP53, TRPV1, TSP O TTP4, UCP2, VCAM1, VEGFA, VIM, ZFP36                                                                                                                                                                                                                                                                                                                                                                                                                                                                    |

|                   |                                   |               |        |        |        |          |          |                                                                                                                                                                                                                                                                                                                                                                                                                                                                                                                                                                                                                                                                                                                                                                                                                                                                                                                                       |
|-------------------|-----------------------------------|---------------|--------|--------|--------|----------|----------|---------------------------------------------------------------------------------------------------------------------------------------------------------------------------------------------------------------------------------------------------------------------------------------------------------------------------------------------------------------------------------------------------------------------------------------------------------------------------------------------------------------------------------------------------------------------------------------------------------------------------------------------------------------------------------------------------------------------------------------------------------------------------------------------------------------------------------------------------------------------------------------------------------------------------------------|
| Growth hormone    | group                             | Inhibited     | -2,565 | -2,344 | 0,033  | 7,88E-10 | 4,34E-08 | ACAA1,ACACA,ADIPOQ,AKR1B1,ALB,APLP1,BMP7,BPHL,C3,CAT,CDH3,CISH,CITED2,CLDN15,CLU,COL18A1,COL1A1,COL3A1,COMT,CSHL1,CTH,CYP27B1,CYP2C8,CYP3A4,DDIT3,DDR1,DYRK2,EGR1,FN1,FOS,FZD5,G6PC,GHR,GLUD1,GSTA1,GSTM5,GSTP1,HADH,HBB,IGFALS,INSR,JUNB,LDLR,LEPR,LPL,MYOD1,NAMPT,NFKBIA,NPPA,PCK1,PCNA,PKK4,PLK2,PPARA,PPARG,PPP1R15A,PRL,RAB3A,RPH3A,SGK1,SOC2,SPP1,SST,STAT5A,TKT,TNFSF10,TUBA1A,XDH                                                                                                                                                                                                                                                                                                                                                                                                                                                                                                                                             |
| MKKN1             | -0,007                            | kinase        | 0,056  | 0,552  | 0,080  | 8,40E-10 | 4,59E-08 | AGRN,ANXA2,ANXA5,ARVCF,ATAT1,ATP1A3,BMP8B,CAMK2A,CRMP1,EPB41L2,FOS,FOSB,GNAI1,GPC4,GPS1,HSD17B4,IFIT2,IFRD1,ISG15,KIF21B,LAMB2,LAMC1,LCN2,MAN2A1,MAPK1,MAPT,MYO6,NELL2,NR4A3,PLTP,PRKAR1B,RAB3A,SMAD2,TM9SF2,TP53BP1,TRIM32,USO1,VAMP2,VIM                                                                                                                                                                                                                                                                                                                                                                                                                                                                                                                                                                                                                                                                                            |
| hydrogen peroxide | chemical - endogenous mammalian   |               | 0,562  | 1,008  | 0,044  | 1,18E-09 | 6,30E-08 | ADAM9,ADIPOQ,AKR1C1/AKR1C2,ALOX5,ANXA2,APP,ATF3,AURKA,BAX,BTG2,CASP1,CASP3,CAT,CBX5,CCN2,CCNA2,CCNB1,CD59,CD63,CD81,CDK1,CDKN1B,CFD,CLU,CO1A1,COL1A2,CRYAB,CSF3,CTSD,CTSS,CXCL6,DDIT3,DMNT1,DPAGT1,DUSP1,DUSP2,E2F4,EGR1,ELN,F2RL1,FAS,FDXR,FN1,FOS,FOSL1,FOXO4,GADD45A,GADD45B,GLI1,GLRX,GSTA1,HBEGF,HIF1A,HLA-DRA,HMOX1,HRAS,HSPA5,IFIT2,IL10RB,IL13,IL32,ITGA6,ITGB3,KITLG,KRAS,LCN2,LDLR,MAPK8,MB,MCAM,MCM2,MKD,MITF,MMP1,MUC1,NAT10,NDC80,NFE2L2,NFIL3,NGF,NOS1,NOS2,NOX5,NR4A1,ODC1,PAH,PARP1,PCBP2,PDCD10,PDCD4,PDIA3,PDIA4,PIM1,PPARG,PPM1D,PPP1CA,PSMC4,PSTPIP2,PTEN,PTP4A2,RAB27A,RAC1,RAN,RBMX2,RTN3,SGK1,SHC1,SNAI1,SOD2,SPP1,STAT3,STMN1,SUV39H1,TAP1,TGFBR3,TP53,TP73,UCP2,VCAM1,VDR,VEGFA,VIM                                                                                                                                                                                                                          |
| HTT               | transcription regulator Activated |               | 2,639  | 2,741  | 0,016  | 1,30E-09 | 6,82E-08 | ABCA1,ABCC10,ADRA2B,AGRN,AKAP12,ALDOA,ALDOC,APOA1,APP,ATF3,ATP1A3,AVP,AZIN1,B2M,BAIAP2,BCAP31,BHLHE40,BID,BIRC2,BMP3,C1R,CAMK2A,CANX,CASP1,CASP3,CAST,CAVIN3,CBX5,CCN2,CD74,CDHR5,CDK2AP1,CHRN2,CIT,CITED2,CLCN1,CLDN1,CNR2,COL18A1,COL4A1,COL4A2,COL6A3,COX6A2,CRYAB,CTSD,CYFIP2,DDIT3,DDX50,DLG3,DNAI1,DNAJC3,DRD2,DRD5,EGR1,EMC8,EMP3,ENO3,FGF1,FHL1,FN1,FOS,FOSL1,GAD1,GADD45G,GHRH,GJD2,GLUL,GN7,GPI,HAP1,HBEGF,HIF1A,HMGB2,HOXB1,HRAS,HSPA5,IFI16,IL15,JUNB,KAT2A,KCNC3,KLF9,LDLR,LTBP2,LTF,MAST3,MCAM,MICU1,MLF2,MPRIIP,MTNR1A,MYOD1,NAA15,NAB2,NDUFB2,NFE2L2,NFIL3,NOS1,NOS2,NPTX1,NR2F1,NR4A1,NSF,PCNA,PDE10A,PDE1B,PK2,PEA15,PER1,PER2,PFN1,PIGF,PLOD3,PPARA,PPARG,PPP1R16B,PPP1R1A,PRELP,PRKACB,PRKCD,PROM1,PSMA5,PSMB8,PSMB9,PSME1,PVALB,RGS16,RNF34,RPH3A,SERPINA3,SERPING1,SGK1,SIRT3,SLC12A2,SLC1A2,SN,N,SOC2,SOD2,SPP1,SPTBN2,SQSTM1,SST,STAU1,STMN1,STX4,SYN1,TBX6,TESC,TGFBI,THBS2,THRB,TP53,TRIB2,TRPC1,UCP2,VCAM1 |
| VEGFA             | -0,459                            | growth factor | -0,611 | -0,099 | 0,060  | 1,73E-09 | 8,97E-08 | ABCC1,ADAM15,ADAMTS1,ALAS1,ALDH2,ANPEP,BAX,BCAT2,CASP3,CBFB,CCN2,CD1A,CD83,CDKN1B,CITED2,CO1A1,CSF3,CSTB,CTLA4,CTSS,CTSV,CXCL6,EGR1,ERAP1,ESM1,F3,FN1,FOS,FOSB,GBP1,GRB10,HBEGF,HIF1A,HK1,HLA-DQB1,HMOX1,HSPA5,IGFBP4,ITGAV,ITGB3,JUNB,LDB1,MP1,MRPL3,MTIF2,MVP,NME1,NOS2,NOTCH4,NPHS1,NR2F2,NR4A1,NRGN,NRP1,PARP1,PCNA,PDCD1,PECAM1,PIM1,PNPLA2,PPA1,PRKCA,PSEN1,PTK2,RAB5A,SET,SLC12A6,SNCG,SOD2,ST5,STARD8,TERT,TFPI2,TIMP1,TLR1,TMSB10/TMSB4X,TNC,TOMM70,TP53,TSPO,VCAM1,VEGFA                                                                                                                                                                                                                                                                                                                                                                                                                                                    |
| APOE              | -0,217                            | transporter   | -0,818 | -1,099 | -0,046 | 1,92E-09 | 9,92E-08 | ABCA1,ACAT1,ADAM10,ADGRB1,ADGRG1,ADIPOQ,ADNP,ALOX12,ANXA11,APOA1,APOB,APOD,APP,ATF3,BAX,BEGAIN,C1QA,C1QB,C2,CAPNS1,CASP1,CASP3,CAT,CCL22,CCN2,CD44,CLU,COL18A1,COL1A1,CREB3L1,CTSD,CTSS,CTSV,CYBB,CYP3A5,DCSTAMP,DDIT3,EGR1,ESR1,F2RL1,F3,FOS,GJD2,GLUL,GRIA3,HMOX1,HSP90B1,HSPA5,IL10RA,IL10RB,INSR,JAK1,LCN2,LDLR,LEP,LIMS2,LIPA,LPL,LTBP2,M6PR,MAP2K3,MAP3K1,MAPT,MYLIP,NCF2,NELL2,NMNAT2,NOS2,OGA,P4HB,PEA15,PHF21A,PPARG,PPP1R15A,PSMC4,SEMA6B,SERPINA3,SLC25A44,SMAD1,SOD2,SPP1,TCIRG1,TIMP1,UCP2,VCAM1,WBP2,WNT2                                                                                                                                                                                                                                                                                                                                                                                                               |

|                   |         |                         |           |        |        |        |          |          |                                                                                                                                                                                                                                                                                                                                                                                                                                                                                                                                                                                                             |
|-------------------|---------|-------------------------|-----------|--------|--------|--------|----------|----------|-------------------------------------------------------------------------------------------------------------------------------------------------------------------------------------------------------------------------------------------------------------------------------------------------------------------------------------------------------------------------------------------------------------------------------------------------------------------------------------------------------------------------------------------------------------------------------------------------------------|
| RNA polymerase II | complex |                         |           | -0,005 | 0,152  | 0,080  | 2,05E-09 | 1,05E-07 | ADIPOQ,ALAS1,ALPL,APOC3,APOM,ASNS,B2M,BLNK,CA P2,CASP7,CBX5,CCNB1,CCNB2,CD83,CLDN3,COL1A2,CS DC2,CSHL1,CYP24A1,DCTPP1,DDIT3,DIO1,DLGAP5,DUS P1,ENO1,ESR1,ESRRA,EXOSC8,FOS,FOSL1,FOXC2,GAD D45A,GADD45B,GAST,GBP2,GHR,HBB,HNF1A,HNF4A,HP RT1,HSD11B2,IFNGR1,INS,JUNB,KITLG, KPNA2,LDLR,MAD 2L1,MAPK1,MAPK8,MCM3,MYBL2,MYOG,NFKBIA,NMD3,N OS2,PCK1,PCNA,PKLR,PPARG,PSMB9,PTK2,RAD50,ROR C,RPL13A,SFN,SOD2,SPP1,TAP1,TAPBP,TERT,THBS2,TN NT2,WNT7B,ZNF268,ZNF83                                                                                                                                                |
| PI3K (complex)    | complex |                         |           | 0,717  | 1,116  | 0,055  | 2,07E-09 | 1,05E-07 | ABCA1,ABCC4,ADIPOR1,ALOX5AP,ATF3,ATG5,ATOH1,CA SP3,CCN2,CCNB1,CCT6A,CD44,CDK4,CDKN1B,CNR2,CO L1A1,CTCF,CTSD,CYBB,DDIT3,DUSP1,E2F4, FN1,FOS,FO SL1,FOXO1,FRY,FUT7,GLI1,GSTA1,GSTM5,GSTP1,HBEGF ,HIF1A, HK1,HMOX1,INHA,INS,ITGA6,ITGB2,KRAS,LASP1,L CN2,LEFTY2,LEP,LTBP2,MCAM,MITF,MMP1,MTHFD2,MYO D1,NFE2L2,NFKBIA,NME1,NOS2,NPPA,NRAS,PCDC4,PIM 1,PMEL,POSTN,PTPN12,RGS2,RHOB,SEMA6D,SGK1,SLC 12A6,SLC5A5,SNAI1,SNCG,SOAT1,SPP1,SST,STMN1,TNF SF10,TP53,UGCG,VCAM1,VEGFA,WT1                                                                                                                                |
| BDNF              | -0,043  | growth factor           | Inhibited | -3,838 | -3,585 | 0,032  | 2,36E-09 | 1,19E-07 | AGRN,ALDH7A1,ANXA2,ANXA5,APP,ARC,ARVCF,ATAT1,A TP1A3,BHLHE40,BID,BMP7,CAMK2A,CASP3,CAV2,CRMP1 ,DNAJB5,DRD2,DUSP1,EGR1,ELOVL6,EPB41L2,FOS,FOS B,GLUL,GNAI1,GPC4,GPS1,HSD17B4,HSPA5,IFRD1,KIF1A ,KIF21B,LAMB2,LAMC1,LCN2,LEP,LGALS1,LYPD1,MACRO D1,MAN2A1,MAPK1,MAPT,MMP1,MYO6,MYOD1,MYOG,NA B2,NECAB3,NELL2,NOS1,NOS2,NR4A1,NR4A3,NTF3,P4H A1,PCNA,PER2,PLG,PLTP,PRKAR1B,PTEN,PTEN,RAB3A ,REEP5,RHOA,S100A10,SLC16A7,SLC17A7,SOD2,SPP1,S PRY2,SST,SYN1,TIPARP, TM9SF2,TNFRSF11B,TP53BP1,T RIM32,TIR1A1,USO1,VAMP2,VIM,WNT7                                                                                   |
| CREBBP            |         | transcription regulator |           | -1,447 | -1,135 | 0,053  | 2,55E-09 | 1,27E-07 | AKAP12,ALAS1,AMHR2,B2M,BMP7,CA2,CAMK2G,CAPG,C D44,CD53,CD59,CDKN1B,CGA,COL1A2,CRYBB2,CTSG,CY BB,CYP24A1,DHRS3,DUSP1,DUSP22,EGR1,EGR3,EPN1,E VI2A,FDX1, FNDC3B,FOS,FOSB,FUT7,G6PC,GHRH,GLI1,G M2A,GNAS,GRIA3,HBB,HLA-B,HLA-DRA,HLA- G,HSD3B2,IL10RA,INHA,ISG15,ITGA6,ITGA9,JUND,KLK3,L DLR,LGALS3BP,LPL,LTA,MCM3,MFHAS1,MPZ,MSH2,MYO D1,NDRG1,NFE2L2,NFKBIA,NOS2,NPPA,NR4A1,NR4A3,N TRK3,PCK1,PCNA,PDE10A,PHIP,PIP5K1B,PKLR,PLEKHA1 ,PRKCD,PRL,PSMB9,PTPRF, RB1,RGS2,RHOA,RNF39, RTP 4,SERPINA3,SERPINE2,SLC1A2,SLC43A1,SST,TAPBP,TB X4,TESC,TIPARP,TLE6,TLR2,TMPRSS2,TMPRSS4,TNC,TN FSF10,VCAM1,VEGFA,WNT8R |
| RAF1              | -0,028  | kinase                  |           | -1,120 | -0,619 | 0,070  | 2,73E-09 | 1,36E-07 | AKAP12,ANKRD2,ANXA1,AP2B1,BECN1,CA2,CCN5,CD44, CD74,CDKN1B,CLDN1,CRYAB,CSTA,DHRS3,DUSP2,EGR 1,EGR3,ELK1,EMP3,ESR1,FAS,FGFBP1,FOS,GRN,HBEGF, HIF1A,HMGB3,HNRNPAB,HSD11B2,IER2,INS,ITGB3,LHB,L PGAT1,MET,MGLL,MMP1,MYBL2,NFKB1,NGF,NPPA,OSM R,PCK1,PNP,PPP1R10,PRL,PRSS3,RAC1,RAN,RRM2,SEL ENBP1,SLC16A7,SLC26A2,SMAGP,SNRPD1,SPRY2,ST3G AL4,TBP,TERT,TFPI2,TIMP1,TNNI1,TSPCAP1,VEGFA                                                                                                                                                                                                                         |
| NOS2              | -0,309  | enzyme                  |           | 0,664  | 0,733  | 0,009  | 2,95E-09 | 1,46E-07 | ACO1,ADIPOQ,ALDH3A1,APP,AVP,AZGP1,BAX,CASP3,CA V3,CD44,CD53,CFD,CHI3L1,COL4A1,COX6A2,FAS,FOXO1, FOXP3,G6PC,GPD1,GSPT2,HIF1A,HMGB2,HMOX1,IFIT3,IL 32,IRAK1,ISG15,ITIH4,KRT4,LCN2,LEP,LGALS3BP,MAPK8, MB,MCM5,NFKBIA,NKX2- 5,NOS2,NPPA,PCNA,PERP,PIGR,PLSCR1,PRL,SERPINA3, SFXN1,SLC2A4,SPRR3,TIMP1,TKT,TNFSF10,TNNC1,TNNT 2,TOR3A,TSPYL2,TYROBP,VEGFA                                                                                                                                                                                                                                                        |
| MAPK8             | -0,221  | kinase                  |           | -1,129 | -0,915 | 0,031  | 3,32E-09 | 1,63E-07 | ABCA1,APOA1,APOD,ATG5,B4GALT5,CASP3,CAT,CCN2, CCNA2,CDKN1B,COL1A1,CSTA,CYBB,DDIT3,DNMT1,DUS P1,EGF,EGR1,ELK1,FOS,FOSL1,FOXO1,FOXO4,FUS,G6P C,GADD45A,GCK,HDAC6,HMOX1,IL13,JUND,LEP,LHB,MM P1,MMP7,MUC5B,MVP,MYOG,NOS2,NPPA,NRP1,PTEN,R BP1,SH2D2A,SLC10A1,SOD2,TBP,TBX21,TLR2,TP53,TSC2 D3,VDR,WNT6,ZFP36                                                                                                                                                                                                                                                                                                   |
| ACOX1             | -0,146  | enzyme                  | Inhibited | -2,150 | -2,252 | -0,015 | 3,40E-09 | 1,66E-07 | ACAA1,ADAMTS1,ANXA2,BAAT,CAT,CD63,CHRN2,COL4 A2,CRAT,CSTB,CTSV,CYP26A1,CYP2C8,CYP4A11,CYP4F 12,CYP7B1,DDIT3,DIO1,DPP4,FABP2,G6PC,GADD45A,GN MT,GSTP1,HDAC1,HPD,HSPA5,LCN2,LGALS3BP,LHPP,LP CAT3,LPL,MGLL,NFE2L2,OAT,PAH,PKD4,PLSCR1,QPCT,R GS2,SELENBP1,SGK1,SLC37A4,SQSTM1,TP53,UCP2,UG CG,UGT8                                                                                                                                                                                                                                                                                                            |

|               |        |                                   |        |        |        |          |          |                                                                                                                                                                                                                                                                                                                                                                                                                                                                                                                                                                                                                                                                |
|---------------|--------|-----------------------------------|--------|--------|--------|----------|----------|----------------------------------------------------------------------------------------------------------------------------------------------------------------------------------------------------------------------------------------------------------------------------------------------------------------------------------------------------------------------------------------------------------------------------------------------------------------------------------------------------------------------------------------------------------------------------------------------------------------------------------------------------------------|
| FGF19         |        | growth factor                     | -0,443 | -0,473 | -0,010 | 3,41E-09 | 1,66E-07 | ACACA,ACACB,AFP,ALDH1A1,AQP8,CYP7B1,EGR1,ENO3,FBP1,FOS,G0S2,GADD45A,GCK,HLA-DQB1,HSD3B2,LCN2,LEP,LEPR,MCAM,MME,NNAT,NR0B2,PKLR,PRL,PROM1,PTGDS,RGS16,RGS2,SERPINA3,SGK1,SLC10A2,SLC2A5,SLPI,TNNI1                                                                                                                                                                                                                                                                                                                                                                                                                                                              |
| testosterone  |        | chemical - endogenous mammalian   | 1,543  | 1,873  | 0,037  | 3,71E-09 | 1,79E-07 | A2M,ADIPOQ,ADRA2B,ALDOA,ANPEP,ANXA1,ANXA3,AVP,BAX,BMP7,CASP3,CASP8,CAST,CAT,CCNC,CDK4,CDKN1B,CGA,CLCN3,CLU,COX6A2,CRK,CST8,CTSV,CYB5A,CYP7B1,DHCR24,EGF,EGR1,EIF4G3,ELOC,ESR1,FADD,FAS,FN1,FOS,FOSB,FOSL1,FOXO1,GADD45A,GDF9,GHRH,GMFB,GPX5,HIF1A,HSD3B2,JUND,KLK3,KRAS,LEP,LGALS1,LHB,MMP7,MX1,MYOD1,MYOG,NDRG1,NFKBIA,NGF,NOS1,NOS2,OAT,ODC1,PARP1,PCNA,PDIA4,PDYN,PPARA,PPARG,PSEN1,PSMA1,RAI14,RARG,SHBG,SLC25A10,SLC5A5,SMAD2,SOD2,SRD5A2,SST,SSTR2,SSTR3,STAT3,STX3,SYT11,TAC3,TNFRSF11B,TXNRD1,UGT8,VCAM1,VCAN,YWHAFA                                                                                                                                   |
| FOXA1         | 0,002  | transcription regulator Inhibited | -3,082 | -3,121 | -0,007 | 4,43E-09 | 2,13E-07 | AFP,AGR2,ALDH6A1,ANXA1,BEST2,CD58,CDX2,COL18A1,CSHL1,DCT,DSCAM,DSE,ELK3,EPHX1,ESR1,FABP2,FND3B,FSTL1,G6PC,GBP2,GFRA4,HADH,HK1,HNF1A,HNF1B,HNF4A,KLK3,LHFPL6,LYN,MALT1,MLXIPL,MSH2,MUC5B,MUC6,NES,PAM,PCK1,PFKFB1,PPARA,PYY,RORA,RORC,S100A2,SLC12A2,SLPI,SPDEF,SST,TMPRSS2,TNNI1,WNT7B                                                                                                                                                                                                                                                                                                                                                                         |
| PPARG         | 0,186  | ligand-dependent nuclear receptor | -1,003 | -0,791 | 0,023  | 4,69E-09 | 2,23E-07 | ABCA1,ABCG1,ABCG2,ACAA1,ACACA,ADIPOQ,AOX12,AOX15B,APOA1,APP,ATP4A,BAX,BECN1,C3,CA2,CAT,CAV2,CAVIN2,CCL1,CCL17,CCL22,CCN2,CFD,CIDEC,COL1A1,COL1A2,CRABP2,CRAT,CSF3,CXCL6,CYBA,CYP26A1,CYP4A11,DHRS3,DR1,ELOVL6,EPHX1,ESRRA,F11R,FABP1,FABP2,FGF1,FN1,FOSL1,FZD1,G6PC,GCK,GPD1,GSTA1,HMOX1,HR,IHH,IL13,IL25,INS,INSR,KLK11,KLK6,KRT19,LDLR,LEP,LHPP,LPL,ME1,MGLL,MUC1,MYOD1,MYOG,NDRG1,NFE2L2,NOS2,NPPA,NR2F2,NR4A1,NSF,ODC1,PCK1,PCK2,PCLO,PCNA,PK4,PEA15,PECAM1,PEPD,PHKB,PLA2G3,PPARA,PPARG,PPIC,PTEN,PTPRF,RHOB,RORC,SGK1,SHBG,SLC27A3,SLC2A4,SNCG,SPP1,TBCC,TBXA2R,TKT,TNFSF10,TP53,TP53,TP53,TP53,TUBB,UCP2,VAMP2,VAMP8,VCAM1,VDR,VEGFA,VIM,VI,DI,R,YWHAFA |
| VCAN          | 0,866  | other                             | 0,698  | 0,744  | 0,007  | 4,97E-09 | 2,33E-07 | ADM,AGRN,ASS1,C1R,C1S,C3,CASP1,CASP3,CASQ2,CBX6,CCL20,CD59,CEACAM4,CLU,CXCL6,CYBA,ELN,F3,FAS,FN1,GLB1,GUCY1B1,IFI44,IFIT2,IFITM1,IGFBP4,IRF8,LAMB1,LCN2,MX1,MYH10,NFKB1,NFKBIA,PAM,PCSK1N,PRELP,PTK2,RBP1,RGS2,ROCK1,RXRA,SERPING1,SMPDL3B,SOD2,STAT1,TIMP1,TP53,TRIM22,VCAM1,VCAN,VEGFA                                                                                                                                                                                                                                                                                                                                                                       |
| MED1          |        | transcription regulator           | 1,032  | 1,387  | 0,064  | 4,97E-09 | 2,33E-07 | ACAA1,ACACA,ADIPOQ,APOB,AURKA,BAX,BCL7A,BHLHE40,CCN5,CCNB1,CDC20,CDK1,CDK4,CFD,CYP24A1,CYP2B6,CYP3A5,CYP4A11,DIO1,DTYMK,EDF1,FOXO1,GADD45A,GCK,GHR,GSTP1,HPRT1,HSD17B4,IRF8,KLK3,LBR,MAD2L1,MB,MET,MYOD1,NFKBIA,ODC1,PK4,PIM1,PODXL,PPARG,PRDM14,SLC2A4,SMARCA4,STC2,TBX21,TERT,TNNC1,TNNI1,TP53,VDR                                                                                                                                                                                                                                                                                                                                                           |
| INS           | -0,150 | other                             | -0,635 | -0,561 | 0,012  | 5,65E-09 | 2,64E-07 | ACACA,ADAM10,ADIPOQ,ADIPOR1,ADM,ALDH3A2,APOA1,AVP,CAT,CCN2,CIDEC,CITED2,CRABP2,CSHL1,DDIT3,DUSP1,EGR1,ELK1,F3,FADS3,FAS,FOS,FOSB,FOSL1,FOXO1,G6PC,GABARAPL1,GCK,GRB10,HIF1A,HSPA5,IER2,IGFBP4,INSR,JUNB,JUND,LEP,LPL,NOS1,NR4A1,PCK1,PLK2,PPARG,RDH16,SLC2A4,SNAI1,TP53,UGCG,VEGFA,VLDLR                                                                                                                                                                                                                                                                                                                                                                       |
| AKT1          | 0,070  | kinase                            | 0,063  | 0,351  | 0,037  | 5,76E-09 | 2,67E-07 | ADIPOQ,AKR1C1/AKR1C2,ANKH,APOC3,ARL6IP1,ASS1,BAX,CASP3,CD74,CDK4,CDKN1B,CISH,CKS2,CLU,COL4A1,CTSV,CXCL6,EGR1,ENO1,ESR1,FAS,FN1,FOS,FOSB,FOXO1,FOXP3,FSTL1,G6PC,GATM,GCK,GSTM5,HIF1A,HMGB2,HMOX1,HNRNPJ,JUND,KLF15,LAMB1,LCN2,LEP,LIPA,ME1,MEPE,MYH10,MYOG,NDC80,NFE2L2,NFKB1,NOS2,NPPA,PCK1,PDCC1,PKM,PLG,PPARA,PPARG,PRL,RAB11A,RF4,RHOB,SEMA6D,SLC5A5,SNAI1,SPP1,STUB1,TGFBR3,THBS2,TIMP1,TNFSF10,TP53,TPD52L1,TYMS,UBE2C,UBE2I,VCAN,VEGFA,VIM,WINN                                                                                                                                                                                                          |
| linoleic acid |        | chemical - endogenous mammalian   | -0,432 | -0,284 | 0,028  | 6,13E-09 | 2,81E-07 | ABCA1,APOA1,APOB,APP,CD47,CLU,CYP4F12,DDIT3,DGKZ,DUSP1,FABP1,G6PC,HSP90B1,HSPA5,LDLR,LHB,LPL,MLXIPL,MMP1,NEDD4L,NFKBIA,NOS2,PECAM1,PKLR,PSE1,N,RXRA,SLC2A4,UCP2,VCAM1,VEGFA                                                                                                                                                                                                                                                                                                                                                                                                                                                                                    |

|            |        |                                   |        |        |        |          |          |                                                                                                                                                                                                                                                                                                                                                                                                                                                                                                                                                                                                                                                   |
|------------|--------|-----------------------------------|--------|--------|--------|----------|----------|---------------------------------------------------------------------------------------------------------------------------------------------------------------------------------------------------------------------------------------------------------------------------------------------------------------------------------------------------------------------------------------------------------------------------------------------------------------------------------------------------------------------------------------------------------------------------------------------------------------------------------------------------|
| Lh         |        | complex                           | -1,720 | -1,617 | 0,022  | 6,85E-09 | 3,11E-07 | ACTN1,ACTR2,ADAMTS1,ADGRG1,AKAP12,ALPL,ARL4C,ARL6IP5,ATP9A,BAG1,BECN1,BNIP3L,CAMK2G,CAP2,CASP4,CDK14,CDKN1C,COL15A1,COL18A1,CSNK1A1,CYFIP2,CYP11B2,DHRS3,DUSP1,FDX1,FDXR,FOS,GBP1,GK,GNAS,GNB1,GNRH2,HSD3B2,INHA,KIDINS220,MAP2K3,MAP4K4,NTF3,PER1,PHKA2,PLIN3,POP5,PIIH,PRKD1,PRKX,PSIP1,PSMD1,PTPRF,RAB27A,RAB4A,RAB5A,RGS16,RGS7,RHOB,SGK1,SLIT2,SMARCA4,SNAP23,SOD2,SRD5A2,STAT1,STK24,TFPI2,THBS2,TNFRSF11B,TP53,TPM1,TUBA1A,TYRO3,VEGFA                                                                                                                                                                                                     |
| RB1        | 0,238  | transcription regulator Inhibited | -2,493 | -2,354 | 0,017  | 7,80E-09 | 3,52E-07 | ALG5,ALPL,ATOH1,BAX,BCKDHA,BECN1,CACNA1S,CASP3,CASP4,CASP6,CASP7,CASP8,CBX5,CCN2,CCNA2,CCN B1,CDK1,CDKN1B,CDX1,CDX2,CERT1,CHCHD3,CITED2,CLDN3,CMAS,CYP27B1,DCK,DCTN4,DDB2,DDIT3,DEK,DNMT1,EED,EGR1,EI24,F3,FABP2,FAM111A,FANCL,FAS,FN1,FOS,FOSL1,FOXO2,FOXN1,FZD6,GPR12,GPR162,GRPEL1,H2AC8,HMGB2,HRAS,HSBP1,IDH3B,IVL,KPNA4,KRT10,KRT4,MAP2K3,MAPK1,MCM2,MCM3,MCM5,MELK,MET,MFAP1,MYBL2,MYOM2,NDUFA2,NKX2-5,NME1,NTSR2,OGA,PARP1,PCLAF,PCNA,PGD,PIM1,POL D3,PPARG,PPFIBP1,PPP1R17,PPT2,PYY,RAB27A,RB1,RF C4,RFM1,RRM1,RRM2,SMARCA5,SOD2,TERT,TMPO,TNNC1,TNNC2,TNNT2,TP53,TP73,TUBA1A,TYMS,ULK1,VEGFA, VWH4F7NF63R                                |
| oleic acid |        | chemical - endogenous mammalian   | -1,506 | -1,380 | 0,021  | 9,05E-09 | 4,04E-07 | ABCA1,ACACA,ALOX5,APOB,APP,BAX,CLU,CYP4F12,DDIT3,DUSP1,FABP1,FABP2,FOS,G6PC,GADD45A,GADD45B,HMOX1,HSPA5,LGN2,LDLR,LHB,LPL,MLXIP,NFKBIA,NOS2,NPC1L1,NR4A1,PCK1,PKK1,PIK3IP1,PLIN3,PNPLA3,PPARA,PSEN1,PTEN,RXRA,SLC2A4,SOAT1,TLR2,UCP2,VCAM1                                                                                                                                                                                                                                                                                                                                                                                                        |
| FGF2       |        | growth factor                     | -0,327 | 0,026  | 0,040  | 9,84E-09 | 4,34E-07 | ADM,AFP,AKR1B1,ALB,ANPEP,ARC,BAX,BTG2,C1QL1,CA PZA2,CBFB,CCL20,CDKN1B,CDX2,CIDEC,COL1A1,COL1A 2,COL3A1,CRYAB,CSF3,CXCL6,DAD1,DDIT3,DIO3,EGR1,ELK1,ELN,ENO1,EPCAM,F3,FAS,FBN1,FDX1,FN1,FOS,FOSL1,FOXO1,FOXO4,GADD45A,GBP1,GCH1,GLI1,GRIA3,HBE GF,HIF1A,IGFBP4,JUNB,KATNA1,KRAS,MACROD1,MAPT,MCAM,MET,MIP,MITF,MMD,MMP1,MPZ,MYOD1,MYOG,NE S,NEUROD6,NKX2-5,NOS2,NOTCH4,NR4A1,NTF3,ODC1,PCNA,PLK2,PPARG,PPP1R12A,PRKCD,PRL,PTTG1,RB1,S100A10,S100A4,SE MA6D,SHBG,SLC34A1,SNAI1,SPP1,SPRY1,SPRY2,SPRY4,SQSTM1,ST3GAL4,TEAD4,TFPI,TGFBR3,TIMP1,TNFSF10,TP53,USP47,VCAM1,VEGFA,VIM,WNT10B,XRCC5                                                         |
| JUN        | -0,496 | transcription regulator           | -0,574 | -0,226 | 0,042  | 1,01E-08 | 4,44E-07 | A2M,AFP,AKAP12,ALAS1,ALOX12,ANGPTL2,ANKRD2,ANXA1,ANXA2,APOC3,APOM,APP,ASNS,ATF3,BAX,BIRC2,CAL M1 (includes others),CAPN2,CAPNS1,CCL20,CCN2,CCNA2,CD44,CDC20,CDK1,CDKN1B,CGA,CLU,COL1A1,COL1A2,COMT,CSTA,DARS1,DNMT1,DROSHA,DUSP1,EVX1,F3,FAS,FN1,FOS,FOSL1,FUS,GADD45A,GAS6,GSTP1,HLA-B,HLA-G,HMOX1,HPGD,IFI16,IGFBP4,ITGAV,ITGB8,IVL,JUNB,LHB,MET,MMP1,MMP7,MPZ,MSH2,MXI1,MYOD1,NCF2,NFKBIA,NGF,NKX2-5,NOS2,NOX5,NPPA,NR0B2,NR4A1,NRCAM,PADI3,PAK3,PARVA,PDCC4,PEA15,PPM1D,PRL,PTEN,PTGDS,PTPRO,PCXDN,RARG,RASA1,RHOB,RNF7,RXRA,S100A10,SGK1,SLC10A2,SNCG,SNRNP70,SOD2,SPP1,SST,STAT1,STMN1,TIMP1,TNC,TNNC1,TP53,TP73,VCAM1,VDR,VEGFA,VIM,ZF D2A |
| NR1H3      | -0,126 | ligand-dependent nuclear receptor | 1,431  | 1,489  | 0,011  | 1,08E-08 | 4,72E-07 | ABCA1,ABCG1,ACACA,APOA1,APOC3,APOD,APOM,ARL4C,ATF3,AURKA,C1QA,CAT,CCL17,CCNA2,CCNB1,CCNB2,CD47,CDC25B,CDK1,CDKN1B,CFB,CSF3,CX3CR1,DDX60,FBP1,FGL2,G6PC,GAS6,GCK,GLI1,GRAP2,GSTM5,GSTP1,HK1,IFIT2,IRF7,ITGB3,KIF20A,LDLR,LPL,LYZ,MELK,MLXIP,MYLIP,NFKBIA,NOD1,NOS2,NR0B2,PFKFB1,PKLR,PLTP,PPARG,PRC1,RB1,SLC2A4,SNAI1,SYN1,TAP1,THRB,TLR1,UBE2C,VCAN,VEGFA,ZBP1                                                                                                                                                                                                                                                                                    |
| FOXA2      |        | transcription regulator           | -0,288 | -0,348 | -0,010 | 1,27E-08 | 5,54E-07 | A2M,ABCC8,AFP,AGR2,ALAS1,ALB,ALDOB,ALOX5,APOA1,APOB,APOC3,APOM,BIRC2,C3,CCL17,CCL22,CDX2,CER1,CHI3L1,CLCA1,CYP26A1,CYP2A6 (includes others),DCT,EPCAM,EPHX1,EPX,FOXO1,G6PC,GCK,GFRA4,HADH,HNF1A,HNF1B,HNF4A,HPGD,IL13,LPL,LYZ,MLXIP,L,MUC5B,MUC6,NFKBIE,PCK1,PDHX,PIM1,PKM,PNLIPRP1,PPARA,PPARG,PROS1,PTGDS,PYY,RARG,RORA,RORC,SLC10A1,SLC2A4,SNAI1,SST,TMPRSS2,TNNI1,UCP2,WNT7B                                                                                                                                                                                                                                                                  |

|         |        |                                 |           |        |        |        |          |          |                                                                                                                                                                                                                                                                                                                                                                                                                                                                                                                                                                                                                                                                                                                                                                              |
|---------|--------|---------------------------------|-----------|--------|--------|--------|----------|----------|------------------------------------------------------------------------------------------------------------------------------------------------------------------------------------------------------------------------------------------------------------------------------------------------------------------------------------------------------------------------------------------------------------------------------------------------------------------------------------------------------------------------------------------------------------------------------------------------------------------------------------------------------------------------------------------------------------------------------------------------------------------------------|
| ELAVL1  | 0,140  | other                           |           | -0,424 | -0,171 | 0,054  | 1,42E-08 | 6,12E-07 | ABCA1,ANXA11,ATF3,CALM1 (includes others),CD83,CLDN1,CLDN3,DUSP1,EIF4E2,EIF4ENIF1,EIF4G1,ELAVL1,FOS,HMOX1,IL13,MYBL2,MYOD1,MYOG,NOS2,PBK,PIGR,PRC1,PROM1,QARS1,RACK1,RFC5,RPN2,SLC7A7,SQSTM1,STAT3,TAF9,TIA1,TIMM17A,TP53,TRIOBP,TSC22D3,VEGFA,WEE1,ZFP36                                                                                                                                                                                                                                                                                                                                                                                                                                                                                                                    |
| SP3     | 0,223  | transcription regulator         |           | 0,560  | 0,739  | 0,041  | 1,50E-08 | 6,42E-07 | ABCA1,AKAP12,ALOX12,ALOX15B,APBA1,ASNS,ATF3,CC20,CD2AP,CDC25B,CDKN1B,CHI3L1,CITED2,COL1A1,COL1A2,CYP26A1,CYP7B1,DRD2,DUSP1,EGR1,ESR1,F3,FAS,FDX1,FOS,FOSL1,FOXP3,GHR,HSD11B2,HSPA5,ITGB8,KRT81,LDLR,LPL,MET,MSH6,NCF2,NES,NFKB1,NOS1,PKM,PRKCD,PTCRA,PTTG1,PYY,RRAS,SGK1,SOD2,STAT1,STAT3,TERT,TGFBR3,TGM1,TIMP1,TLR2,TNC,TNNC1,TP53,TSPO,TXNRD1,VEGFA,VIM                                                                                                                                                                                                                                                                                                                                                                                                                   |
| CREB1   |        | transcription regulator         |           | -1,347 | -1,077 | 0,027  | 1,51E-08 | 6,42E-07 | ABCA1,ADM,AKAP13,ALAS1,ALOXE3,ANGPTL2,APOLD1,AR,ARHGAP33,ATF1,ATF3,AURKA,AVP,BCAP29,BHLHE40,BTG2,CA10,CAMKV,CCNA2,CCNB1,CCNB2,CDA,CDK14,CGA,CPD,CRMP1,CSR2,CYFIP2,DMBT1,DUSP1,EGR1,ESRRG,FABP2,FGL2,FN1,FOS,FOSB,FOXP3,FUT7,G6PC,GAD1,GADD45A,GADD45B,GADD45G,GALNT1,GLA,GPR12,GPR3,GRIA3,HLA-A,HLA-DQB1,HLA-DRA,HLA-D,HLA-E,HMOX1,HPGD,HSPA4,HSPA5,IDI1,IER2,INA,INHA,IRF7,JP1,JUNB,KDEL3,KYAT1,LAPT4B,LCN2,LDLR,LEP,LPL,MARCKSL1,MCAM,MCM5,MEST,MMP1,MNS1,MRPL49,MUC5B,MYBL2,MYH10,NAB2,NEUROD6,NFIL3,NNAT,NOS1,NOS2,NOX5,NR4A1,NR4A3,NRP1,PAM,PCK1,PCNA,PDYN,PER1,PER2,PLXNA2,PPARG,PPP1R15A,PRL,PSEN1,RALYL,RB1,RGS2,SEMA4A,SEMA7A,SERPINI1,SGK1,SHTN1,SLC2A4,SLC8A2,SOC2,SOD2,SQSTM1,SRPK2,SRSF10,SST,STAT3,STMN1,SULT2B1,TCEAL9,TIPARP,TMBIM1,TSKU,VEGFA,VIM,WDR2,ZEB2 |
| IGF2    |        | growth factor                   |           | 0,018  | 0,141  | 0,031  | 2,14E-08 | 9,03E-07 | ALAD,CASP6,CAV3,CCN2,CDK1,CTSV,DDIT3,DUSP1,EGR1,ELOVL6,FN1,GADD45A,GATA6,GCH1,GHR,GNB1,GRN,HBEF,HIF1A,IER2,IFITM2,IGFBP4,JUNB,KLF9,LEP,MCM2,MCM5,MMP1,MX1,MYBL2,MYOD1,MYOG,NDRG1,NFKBIA,NGF,NOS2,PDCC4,PIM1,PMS1,PTEN,RGS16,RHOB,RRM1,RRM2,SKAP2,SLC2A4,SPP1,TGFBI,THBS2,TP53,VEGFA,ZFAND5                                                                                                                                                                                                                                                                                                                                                                                                                                                                                   |
| NRG1    |        | growth factor                   |           | 0,285  | 0,470  | 0,033  | 2,28E-08 | 9,54E-07 | ABCA1,ACAT1,ACTN1,ATF1,BDH2,BET1,CAPN1,CASP3,CCN2,CDKN1B,CDX2,CHCHD3,CHRD,CKS2,COL1A1,COL6A3,CXCL6,DAD1,DDIT3,DUSP1,EGR1,EGR3,ENO3,FGF1,FN1,FOS,FOSB,FSTL1,GAD1,GPI,HIF1A,HMOX1,IDH3B,IDI1,IER2,ITGAV,ITGB3,JUNB,JUND,KLK3,LPCAT3,LSM1,MGLL,MYBPC3,MYOG,NKX2-5,NPPA,NR4A1,NR4A3,PDCC4,PFKFB1,PKLR,PLG,PRL,PYGM,RAB3A,SHBG,SLC2A4,SNAI1,SOX4,VEGFA,VIM,ZFP36,ZNF33B                                                                                                                                                                                                                                                                                                                                                                                                           |
| MAP2K1  | 0,132  | kinase                          |           | -1,081 | -0,692 | 0,063  | 2,29E-08 | 9,54E-07 | ABCC1,ADGRG1,AHR,ALDH1L1,APOBEC3G,ATF3,BIRC2,CCN2,CCNA2,CD44,CDKN1B,COL1A1,COL1A2,COL3A1,CRYAB,CSTA,DNMT1,DPP4,DUSP1,ELK1,ENO1,F3,FOS,FOSL1,FURIN,HIF1A,HSPA5,INS,ITGB3,IVL,JUND,LDLR,LEP,LHB,MITF,MMP1,MPZ,MUC5B,NET1,NFKBIA,NOS1,NOS2,NOX5,OLFM4,PCNA,PECAM1,PIM1,RAB38,RRM2,SERPINE2,SMAD2,SPDEF,TFPI2,TNC,TNFSF10,VEGFA,ZWINT                                                                                                                                                                                                                                                                                                                                                                                                                                            |
| inosine |        | chemical - endogenous mammalian | Activated | 3,980  | 4,276  | 0,061  | 2,49E-08 | 1,03E-06 | A2M,ANXA1,ANXA2,ANXA5,ARPC1B,C1QA,C1QB,C1S,C2,C3,CD63,CFB,CFD,DPP4,EMP3,LGALS3BP,RHOC,RNASE T2,SERPINB1,SERPING1,TIMP1,TSPO,TUBA1A,VIM                                                                                                                                                                                                                                                                                                                                                                                                                                                                                                                                                                                                                                       |
| TWIST1  | -0,002 | transcription regulator         |           | 0,636  | 0,818  | 0,028  | 2,88E-08 | 1,17E-06 | ADAMTS1,ALDH1A1,APOD,BAX,C3,CASP3,CD44,CHI3L1,COL1A1,EMP3,ESR1,FAS,FN1,FOS,FOSL1,FOXC2,FOXO1,GLI1,IGFBP4,ITGA8,ITGB3,KCNN4,LEFTY2,MET,MGST3,MME,MMP1,MXRA8,PAM,PAMR1,PDZD2,PRL,PROM1,PRRX2,PTPRU,PXDN,RHOA,RHOC,SLC28A3,SNAI1,SPOCK2,SPP1,TBX21,TGFBI,THBS2,TP53,VCAN,VEGFA,VIM                                                                                                                                                                                                                                                                                                                                                                                                                                                                                              |
| KDM5B   | 0,293  | transcription regulator         | Inhibited | -4,118 | -4,366 | -0,039 | 4,12E-08 | 1,64E-06 | ARL6IP5,ASF1A,AURKA,BUB3,CCN2,CCNB1,CDIPT,CDK1,CDKN1B,CLDN1,CYB5A,DDIT3,DHCR24,DLGAP5,DPY19L1,ECT2,EGR1,EIF5B,ESR1,FHL1,FJX1,GADD45A,GCA,HACD1,HSD17B8,ISG15,ITGB1BP1,LGALS3BP,MCAM,MCM2,MCM3,MPC1,MT1X,NDC80,NKX2-5,PBK,PLS3,PSIP1,PSME3,RNASET2,SNRPD1,STAT5A,SWAP70,WNT7B                                                                                                                                                                                                                                                                                                                                                                                                                                                                                                 |

|                 |        |                                   |           |        |        |          |          |                                                                                                                                                                                                                                                                                                                                                                                                                                                                                                                                                                                                                                                                                              |                                                                                                                                                                                                                                                                                          |
|-----------------|--------|-----------------------------------|-----------|--------|--------|----------|----------|----------------------------------------------------------------------------------------------------------------------------------------------------------------------------------------------------------------------------------------------------------------------------------------------------------------------------------------------------------------------------------------------------------------------------------------------------------------------------------------------------------------------------------------------------------------------------------------------------------------------------------------------------------------------------------------------|------------------------------------------------------------------------------------------------------------------------------------------------------------------------------------------------------------------------------------------------------------------------------------------|
| Vegf            | group  |                                   | -0,269    | 0,333  | 0,058  | 4,28E-08 | 1,70E-06 | A2M,ACKR3,ADAM10,ADAM15,ADAMTS1,ADGRF5,ADGRG1,AHR,AKAP12,AKAP13,ALOX5AP,ANGPTL2,ANPEP,APLN,APOM,ARHGEF17,ASNS,ATF3,AURKA,BAG2,BAX,BMP7,CA2,CALM1 (includes others),CASP1,CASP3,CASP8,CD44,CDC20,CDC25B,CDK1,CDKN3,CHI3L1,CHRN2,CLDN1,CNTFR,CRABP1,CRYAB,CSE1L,CYP4A11,DDIT3,DENND2D,DNAJB9,DTYMK,EGR1,EGR3,ELN,ESM1,F3,FAS,FGF16,FN1,FOSB,FOSL1,GRB10,GUCY1B1,HBEGF,HIF1A,HMOX1,HOPX,IGFBP4,IHH,IL18,ITGA10,ITGA6,ITGB8,KITLG,LCN2,LDLR,LY75,LYN,MAD2L1,MAP2K3,MCM2,MCM5,MELK,MET,MID1,MPC1,NAB2,NAMPT,NDC80,NFKB1,NGB,NOTCH4,NR2F2,NR4A1,NR4A3,NRCAM,NRP1,OR7C2,OSBPL10,OSMR,PLOD2,PLXNA2,PRC1,PTK2,RAC1,RGS2,SFN,SGK1,SLC19A2,SOCS2,STAT3,TBXA2R,TIMP1,TLR3,TNC,TNFRSF11B,TPST1,UBE2C,UGCG |                                                                                                                                                                                                                                                                                          |
| ADIPOQ          | -0,184 | other                             | 0,466     | 0,503  | 0,006  | 4,76E-08 | 1,87E-06 | VCAM1,VEGFA,VIM,YDH,ACACA,ACACB,ADIPOQ,ADIPOR1,BECN1,CASP6,CCL20,CCN2,CD163,CDKN1B,CGA,COL3A1,CYBA,CYBB,DUSP1,EGR1,F3,FN1,FOS,FOXP3,G6PC,GCK,GPD1,HBEGF,HMOX1,LDLR,LEP,LEPR,LPL,MMP1,NCF2,NFKBIA,NOS2,NPPA,PCK1,PCNA,PDCD4,PFKFB1,PPARA,PPARG,PTEN,ROCK1,SHC1,SLC2A4,SOAT1,SOD2,STAT3,TIMP1,TP53,UCP2,VCAM1                                                                                                                                                                                                                                                                                                                                                                                  |                                                                                                                                                                                                                                                                                          |
| F2              | -0,082 | peptidase                         | 1,217     | 1,800  | 0,072  | 5,29E-08 | 2,07E-06 | ADIPOQ,AKR1B1,BAX,BIRC2,CASP1,CASP3,CCL20,CCN2,CCNA2,CD44,CD63,CDKN1B,CKAP4,CLIC1,CLU,COL1A1,COL4A1,CORO1C,CYBB,CYP2B6,DIO3,DUSP1,EGR1,ELL2,ESM1,F2RL1,F3,FHL1,FN1,FOS,FOSB,FOSL1,HBEGF,HIF1A,HMOX1,IER2,IGFBP4,IL13,IL32,JUNB,LAMP1,MFHAS1,MGLL,MMP1,MYBL2,MYOG,NCF2,NFKBIA,NOS2,NR4A3,NUP62,PDIA4,PPIF,PROS1,RAB3A,RAC1,RAC2,RHOA,RHOB,SLC16A5,SLIT2,SOD2,SOX15,TFPI,TFPI2,TMED9,TNFSF10,TNNT2,VCAM1,VEGFA,YIF1A                                                                                                                                                                                                                                                                           |                                                                                                                                                                                                                                                                                          |
| CLOCK           | 0,022  | transcription regulator           | 0,137     | 0,095  | -0,008 | 5,43E-08 | 2,12E-06 | APP,AVP,BHLHE40,BPHL,CA1,CBFB,CCN2,CPD,CYP26A1,DDIT3,DNAJB9,DR1,DTX4,EFHC1,EIF4G2,ELOVL6,ESYT1,FGF1,FZD6,GADD45A,GADD45B,GCC2,GCK,GNPTAB,GP3,GTFE1,HLA-DQB1,HSD17B8,IHH,ITM2C,JUNB,KCNN3,KCNS1,KIF20A,MAP2K3,MAPK8,MEST,MGAT2,MMP7,MOXD1,NAA15,NFIL3,NOCT,NR0B2,NTSR2,OPN3,PER1,PER2,PICALM,PPARA,PPIF,RIOX2,SEC23A,SLC12A3,SLC1A2,SLC30A5,ST6GALNAC4,TEF,TMED3,TMX1,TOR1B,TP53BP1,TPST1,UBE3C,IISPR,VSTM4,WFF1,WT1,7773                                                                                                                                                                                                                                                                     |                                                                                                                                                                                                                                                                                          |
| ESR2            |        | ligand-dependent nuclear receptor | -0,558    | -0,474 | 0,013  | 5,77E-08 | 2,23E-06 | ABCA1,ABLIM1,ADAMTS1,AKAP12,ANGPTL2,ANPEP,ANXA4,ATF3,AVP,BAG1,BID,C3,CA2,CADM3,CAPN2,CCN2,CCN5,CCNA2,CDKN1B,CDKN1C,CGA,CLDN1,CLDN11,CLIC5,COL1A1,COL1A2,CTSD,CYP2A6 (includes others),DDB2,DMTN,EGR1,EGR3,ELK1,ESR1,F2RL1,FADD,FHL1,FN1,FOS,FOXO1,GADD45B,GALNT7,GLB1,GLRX,GM2A,GRPR,GSTP1,HAND1,HPGD,HRAS,HSD17B4,IGFBP4,IMPDH2,IVL,JAK1,JUNB,KLK3,KRT19,LAPTM5,LEP,LHB,LPL,MAP2K3,MAPK1,MGAT3,MME,MMP1,MPC1,MUC1,MYCL,MYOD1,NDRG1,NELL2,NFKB1,NFKBIA,NOS2,PDK4,PERP,PIBF1,PPP1R12A,PPP1R3C,PRL,PTEN,PTGDS,PYCR1,RAI2,RHOQ,ROCK1,RORC,SEMA3B,SGK1,SHC1,SLC5A7,SMAD2,SNN,SOCS2,SOX4,SPP1,SYNPO,TEAD4,TERT,TESK1,THBS4,TIMP1,TNFRSF11B,TP53I3,TPM1,TSPAN13,TSP                                |                                                                                                                                                                                                                                                                                          |
| CD38            | 0,036  | enzyme                            | 0,237     | 0,731  | 0,072  | 6,44E-08 | 2,46E-06 | ALDOA,ALDOC,ANXA2,ASNS,ASS1,BNIP3L,CCL22,CD44,CISH,CITED2,CKAP4,CLCN3,COL1A1,CRELD2,EAF2,ELL2,FGL2,FN1,GADD45G,GALK1,GBP2,IFI30,IL6R,LTA,MANF,NDRG1,NFIL3,P4HA1,PDCD2,PDIA6,PDLIM1,PFKP,PIM1,PKM,PRDX4,PYCR1,RBPMS,S100A4,S100A6,SDF2L1,SEMA4A,SOCS2,STK39,TMED5,UCHL3,UPB1,VCAM1,VIM,ZBTB32                                                                                                                                                                                                                                                                                                                                                                                                 |                                                                                                                                                                                                                                                                                          |
| thyroid hormone |        | chemical - endogenous mammalian   | Inhibited | -3,079 | -3,087 | -0,001   | 6,75E-08 | 2,54E-06                                                                                                                                                                                                                                                                                                                                                                                                                                                                                                                                                                                                                                                                                     | ABC1,AFP,ALDOB,BTG2,CCNA2,CDKN1B,COMT,CRAT,CSNK2A1,DAD1,DBI,DNAJC3,EGF,EGR1,FOS,FZD6,G6PC,GCH1,GHR,HR,IGFBP4,INHA,KCNA5,KLF3,KLF9,LEP,LPL,ME1,NHLH1,NNAT,NPPA,NRAS,OAT,PCK1,PER1,PGD,PHYH,PKLR,PPARA,PRL,PTEN,PTGDS,RYK,S100A10,SEMA6B,SERPINE2,SLC6A4,SST,ST14,STAT1,THRB,UCP2,VIM,YWHA |

|        |       |                         |           |        |        |          |          |                                                                                                                                                                                                                                                                                                                                                                                                                                                                                                                                                                                                        |                                                                                                                                                                                                                                                           |
|--------|-------|-------------------------|-----------|--------|--------|----------|----------|--------------------------------------------------------------------------------------------------------------------------------------------------------------------------------------------------------------------------------------------------------------------------------------------------------------------------------------------------------------------------------------------------------------------------------------------------------------------------------------------------------------------------------------------------------------------------------------------------------|-----------------------------------------------------------------------------------------------------------------------------------------------------------------------------------------------------------------------------------------------------------|
| HDAC1  | 0,351 | transcription regulator | -1,147    | -1,229 | -0,013 | 7,41E-08 | 2,77E-06 | ADIPOQ,AKAP12,APOA1,ARC,ATF3,ATG5,BAX,CAVIN2,CNA2,CCNB1,CCNB2,CD44,CDK1,CDKN1B,COL1A1,COL1A2,CSHL1,DUSP1,EGR1,ESR1,FABP1,FABP2,FAS,FOS,FOX P3,GABARAPL1,GAST,GLI1,GLUL,GNAS,GSTP1,IL13,INA, KLK3,LCN2,MCM3,MCM5,MME,MPZ,MYBL2,NFKBIA,NKX2-5,NOS2,OLFM4,PCK1,POLL,PPARG,PTEN,RBBP7,RGS10, RHOB,RORC,RRM2,SGK1,SLC1A2,SNAI1,SOX10,SPP1,SQ STM1,ST5,STAT3,TBX2,TBX6,TERT,TNS1,TP53,TP73,TSC 22D3,TYMS,VDR                                                                                                                                                                                                 |                                                                                                                                                                                                                                                           |
| Jnk    |       | group                   | 0,807     | 1,163  | 0,052  | 7,75E-08 | 2,88E-06 | A2M,ABCA1,ANXA5,APP,ATG5,BAX,CASP3,CCL22,CCN2, CD44,CD83,CDK4,COL1A1,COL3A1,CRIP2,CXCL6,DDIT3,D NMT1,DUSP1,E2F4,EGR1,F12,F2RL1,F3,FAS,FN1,FOS,FO SB,GADD45A,HMOX1,HNF4A,HSPA5,IL13,INS,JUND,LHB, MMP1,MSH2,NFE2L2,NOS2,NR4A1,PLG,PLSCR1,PON2,P OSTN,PPM1D,PRL,PTEN,RARG,RBP1,RXRA,SOD2,STRA6 ,TBP,TERT,TIMP1,TP53,VCAM1,VCAN,ZFP36                                                                                                                                                                                                                                                                     |                                                                                                                                                                                                                                                           |
| lfn    |       | group                   | Activated | 3,685  | 4,001  | 0,055    | 8,65E-08 | 3,20E-06                                                                                                                                                                                                                                                                                                                                                                                                                                                                                                                                                                                               | ADAMTS1,B2M,BAG1,CASP8,CD44,CD58,CD83,CYP4A11, DDX58,FAS,FOS,HIF1A,HLA- A,IFIH1,IFIH1,IFITM1,IL10RA,IL15,IL32,IL7,IRF7,IRF8,ISG15, LCN2,MAVS,MX1,NOS2,PECAM1,PLAAT4,SPP1,STAT1,TA P1,TLR1,TLR2,TLR3,TP53,TRIM21,TRIM22,XDH,ZBP1                           |
| EP300  |       | transcription regulator | -1,643    | -1,198 | 0,067  | 1,11E-07 | 4,09E-06 | ACACB,ADIPOQ,AKAP12,AMHR2,AQP5,B2M,BAX,BCLAF1, CA2,CAPG,CAV3,CD53,CD59,CDKN1B,CHPT1,COL1A2,CO MT,CRAPP2,CRYBB2,CSF3,DHRS3,DIO1,DRD2,DUSP1,D USP22,EGR1,EPN1,EVI2A,FDX1,FN1,FNDC3B,FOS,FOXO1 ,G6PC,GAST,GM2A,HBB,HLA-B,HLA- G,HMOX1,HSD11B2,IL10RA,INS,ITGA6,ITGA9,ITGB2,KLK3, LEFTY2,LEP,LGALS3BP,LHB,LTA,MAPT,MCM3,MFHAS1,M MD,MME,MMP1,MMP7,MSH2,MYOG,NDRG1,NFKBIA,NOS2 ,NPPA,NR4A1,NTRK3,PARP1,PCK1,PDE10A,PDK4,PERP, PHIP,PIP5K1B,PKLR,PLEKHA1,PPARA,PRKCD,PRL,PSEN 1,PTEN,PTPRF,RB1,RBP1,RHOA,RNF39,RORC,RTP4,SLC 43A1,SOD2,TERT,TESC,TIPARP,TLE6,TLR2,TMPRSS2,TM PRSS4,TNC,TP53,IRF7,VEGFA,WNT8R |                                                                                                                                                                                                                                                           |
| CNOT7  | 0,116 | transcription regulator | -1,553    | -1,698 | -0,060 | 1,15E-07 | 4,18E-06 | B2M,CLDN1,CSTA,HERC6,IFI35,IFIT5,IFITM1,ISG15,LGALS 3BP,OAS1,PARP12,PLSCR1,PSMB8,SP110,STAT1,TAP1,U BE2L6                                                                                                                                                                                                                                                                                                                                                                                                                                                                                              |                                                                                                                                                                                                                                                           |
| SRF    |       | transcription regulator | -0,508    | -0,330 | 0,029  | 1,27E-07 | 4,61E-06 | A2M,ACTG1,AKAP12,ANKRD6,APOLD1,ARC,BICC1,BRD3, CAP1,CAPRIN1,CCN2,CD177,CDK4,CEBPE,CLDN1,CLDN1 5,CLDN3,CSR2,CTSG,DSTN,EGR1,EGR3,ELK1,EPX,FER MT2,FGF1,FHL1,FHL2,FILIP1L,FOS,FOSB,FOSL1,G0S2,GA DD45A,GADD45G,GCH1,GP9,GSTM5,HMOX1,IER2,IL15,IT GA6,ITGA9,JUNB,LCN2,LDLR,LEPR,LPCAT3,LPL,LTTF,MAP 4K4,MAPK10,MAPK13,MAT1A,MED6,MTMR6,MYOD1,MYO G,NET1,NEUROD6,NKX2- 5,NPPA,NR4A1,OPN3,PDCD10,PLA2R1,PMFBP1,PRG2,PT MS,RAI2,RFC4,SEMA6D,SLC6A4,SLPI,SND1,SNX2,SPTBN 2,TBP,TMEM184C,TNC,TNNC1,TNN2,VCAN,WDR1,WT1                                                                                           |                                                                                                                                                                                                                                                           |
| SP110  | 0,251 | transcription regulator | Inhibited | -2,605 | -2,714 | -0,016   | 1,34E-07 | 4,84E-06                                                                                                                                                                                                                                                                                                                                                                                                                                                                                                                                                                                               | ANXA5,ATF3,CD74,CLU,EGR3,F3,FLII,FUS,GRN,IFIH1,IFIT 3,IFITM1,IL18,IL6R,IRF9,ITGAV,LY96,MRTFB,MX1,NCK1,NF IL3,OAS1,PANX1,PERP,PLSCR1,PPARG,PRKCA,PTPN12, RAC1,RPA1,RXRA,SMAD2,SMARCA4,SMARCD3,SOX4,SQ STM1,STAT1,STAT5A,TGFBR3,TIA1,TIMP1,TRIM5,WWOX, YAP1 |
| MAPK14 |       | kinase                  | -0,171    | 0,139  | 0,046  | 1,47E-07 | 5,28E-06 | ABCA1,ALOX5AP,BAX,CAT,CCL25,CCNA2,CCNB1,CD83,C OL1A1,CRYAB,DUSP1,ELAVL1,FAS,FGFBP1,FN1,FOS,G6 PC,GADD45A,GNAS,HMOX1,IL13,IL18,ITGB8,IVL,JUNB,JU ND,KITLG,LDLR,MAPT,MMP1,MUC5B,MYOG,NOS2,NPPA, NRP1,PCK1,PECAM1,PRL,PSEN1,PSMD10,PTEN,SGK1,S H2D2A,SHC1,SOD2,TBX21,TIMP1,TP53,TRPV1,VCAM1,VD R,VEGFA,WIF1,ZFP36                                                                                                                                                                                                                                                                                         |                                                                                                                                                                                                                                                           |
| IgG    |       | complex                 | 1,053     | 0,787  | -0,037 | 1,53E-07 | 5,46E-06 | ADGRG1,ADM,AFM,APP,B2M,C3,CD1B,COL3A1,CRABP2, DDIT3,DSG3,DUSP1,EFNA3,ELK1,FGFBP1,FN1,FOSB,FOX P3,GNAS,HLA- E,HSPA5,IER2,IFITM1,IL13,IL25,ISG15,ITGB8,IVL,JUND,KL K11,KLK6,KLK7,KRT10,KRT31,LCN2,LDLR,LGALS1,NGF,P EA15,PIM1,PLS3,PPIF,PPL,PPP1R15A,SPINT1,ST14,STK2 4,TAPBP,TNC,TNFRSF13B,TOB1,TRIM29,UGCG,VCAM1,V EGFA,ZFP36                                                                                                                                                                                                                                                                          |                                                                                                                                                                                                                                                           |



|              |        |                                 |           |        |        |        |          |          |                                                                                                                                                                                                                                                                                                                                                                                                                                                                                                                                                                                 |
|--------------|--------|---------------------------------|-----------|--------|--------|--------|----------|----------|---------------------------------------------------------------------------------------------------------------------------------------------------------------------------------------------------------------------------------------------------------------------------------------------------------------------------------------------------------------------------------------------------------------------------------------------------------------------------------------------------------------------------------------------------------------------------------|
| STK11        |        | kinase                          |           | 0,027  | 0,209  | 0,022  | 1,54E-07 | 5,49E-06 | A2M,ADSL,AHCY,ALB,ALDOA,ASS1,ATF3,ATIC,BMP5,BTF3,CCNA2,CCT6A,CDKN1B,COL3A1,CSF3,CTSD,CXCL6,CYP2B6,DCTPP1,DLGAP2,DNMT1,ECM2,EIF3A,ENO1,FBXO9, FN1,FOSL1,GADD45A,GADD45B,GPI,GRIA3,HIF1A,IMPDH2,JUNB,LTB,LUM,LYPD3,MCAM,MMP17,NDUFA2,NET1,NO D1,NOS2,NRCAM,PAPSS1,PCDHA10,PCK2,PDYN,PKM,PNP,POLR2E,PPA1,PTEN,PTPN3,PYCR1,RB1,RPIA,RRM1,RRM2,SARDH,SERPINI1,SNAI1,SPP1,TALDO1,TARS1,TKT, TNFSF10.TWF2.TXNRD1.TYMS.VEGFA.WNT2                                                                                                                                                       |
| EIF2AK3      | -0,120 | kinase                          |           | -1,804 | -1,537 | 0,064  | 1,76E-07 | 6,23E-06 | ALDH18A1,ASNS,ATF3,ATG5,BECN1,BIRC2,BTG2,CA9,CC L20,CLCN3,DDIT3,DNAJB9,DNAJC3,EGR1,ELP3,FOSL1,G ADD45A,GCH1,HSPA5,NARS1,NDRG1,NFIL3,NOS2,PCK2, PNLIP,PON2,PPP1R15A,SLC1A7,SNW1,SQSTM1,TARS1,T P53,VEGFA,WARS1,YARS1,ZFP36                                                                                                                                                                                                                                                                                                                                                       |
| CSF3         | -0,210 | cytokine                        |           | -0,894 | -0,743 | 0,022  | 1,99E-07 | 6,96E-06 | BAX,CAPG,CD177,CD44,CDK4,CDKN1B,CEBPE,CISH,CTL A4,CTSD,CX3CR1,CYBB,EGR1,EGR3,FOS,FUS,GADD45A, GADD45B,GADD45G,HLA-DPA1,HLA-DRA,HLA- DRB1,HMOX1,HOXB7,IK,IL7,ITGB2,KITLG,LCN2,LTA,LTB, LTF,LY96,LYZ,MET,NFIL3,ODC1,PIM1,PIWIL1,PLCB2,PLS C R1,PPARG,PRKCA,RAB27A,RORC,STAT3,TLR2,TNFSF10, TP53,VCAM1,VEGFA                                                                                                                                                                                                                                                                       |
| SMARCB1      | 0,044  | transcription regulator         |           | -1,013 | -0,723 | 0,045  | 2,34E-07 | 8,09E-06 | A2M,ACAT1,ACTR2,AMPH,AURKA,BNIP3L,CA8,CCNA2,CD 44,CDC7,CDK1,COL18A1,COL1A1,COL1A2,COL5A2,CYP2 C8,CYP3A7,CYP4A11,DSG2,F11,F11R,FAS,FBP1,FOS,G6P C,GADD45A,HBEGF,HOXC8,IFI16,IFITM1,IFNAR2,MCM2, MCM3,MCM5,MMP1,MX1,MYBL2,OAS1,PCK1,PFKFB1,POST N,PPARG,PPP1R3C,PTMS,RFC5,S100A1,SLC37A4,SMC4, TBX21,TP53                                                                                                                                                                                                                                                                         |
| mir-21       |        | microRNA                        | Inhibited | -2,702 | -3,148 | -0,055 | 2,49E-07 | 8,49E-06 | ARF4,ARL6IP1,BTG2,C1R,CANX,CASP4,CCL1,CCL17,CCN A2,CCNB1,CCT8,CKS2,CLPB,CLU,COL1A1,COL3A1,CRY2, CSE1L,DLGAP5,ECT2,ELN,FAS,FGF1,FGL2,FN1,FOXP3,F UBP1,GBP2,IFI16,IL18,IL6R,IRAK1,LEPR,LTB,MSH2,NME1, NMT2,NOS2,PBK,PDCD4,PECAM1,PER2,PPA1,PPARA,PR C1,PTEN,RHOB,SLPI,SMAD2,SMARCA4,SOD2,SPRY1,SP RY2,SSR1,STAT1,STAT3,STMN1,TAP1,TBX21,TERT,TGM1 ,TLR1,TLR2,TP53,TPM1,TRIM37,UBE2A,UBE2L6,VCAM1, Y WHAB,ZWILCH                                                                                                                                                                   |
| IRF4         |        | transcription regulator         | Inhibited | -3,134 | -3,337 | -0,032 | 2,52E-07 | 8,58E-06 | ALPL,B2M,CANX,CASP10,CCL1,CCL17,CCL20,CCNB1,CC NC,CDK1,CTLA4,CTSS,CX3CR1,DBI,DDIT3,DNASE2,ELL2, FAIM,FOXP3,GALNT2,GBP1,IL13,IRF7,IRF9,ISG15,MANF, O AS1,PCNA,PDCD6,PHF11,PLSCR1,PPIB,PRKCA,PSMA1,R AC1,RHOA,RHOB,RORA,RORC,SMARCA4,SPP1,STAT1,S UB1,TBX21,TNFSF10,TRIM21,YWHAH                                                                                                                                                                                                                                                                                                  |
| MST1         | -0,121 | growth factor                   |           | -1,715 | -1,820 | -0,029 | 2,63E-07 | 8,80E-06 | CCN2,FAS,FOS,FOXP3,G6PC,GPC3,IL15,IL18,IRF8,MST1R ,NR0B2,PCK1,PTK2,SOX4,SPP1                                                                                                                                                                                                                                                                                                                                                                                                                                                                                                    |
| SIRT1        | -0,193 | transcription regulator         | Inhibited | -2,136 | -2,410 | -0,031 | 2,84E-07 | 9,44E-06 | ABCA1,ABCG1,ACAP1,ADAR,ADIPOQ,AFP,ANXA4,ATOH1, BAX,BCLAF1,CAT,CCNB2,CD74,CD83,CDKN1B,CLCA1,CY P2B6,DDX58,DDX60,ERMP1,ESR1,FAS,FGF5,FN1,FOXO1, FOXP3,G6PC,GABARAPL1,GADD45A,GCK,GFPT1,GLI1,G STA3,HIF1A,HLA-A,HLA- DQB1,HMOX1,IFI44,IFIT3,IL13,IRF7,KDM5B,KIF1A,LAMB1,L APTM5,LDLR,LEP,LGALS3BP,LTBP2,MAPT,MGAT2,MMP1, MYL6,MYOG,NEDD4L,NELL2,NFKBIE,NLGN1,OAS1,P3H3, PARP1,PARP12,PCK1,PCK2,PDK4,PER1,PHKB,PLAGL2,P NPLA3,PSMB9,PYGM,RAC1,RGS16,RNF39,ROCK1,RTP4, SEC61A1,SIRT3,SLC7A10,SNRNP70,SOD2,SP110,SSBP3, STAT1,STAT3,SYNPO,TAP1,TERT,TFPI,TMPRSS4,TP53,T P73,UCP2,WNT2 |
| S100A8       | 1,146  | other                           |           | 1,016  | 1,154  | 0,020  | 2,93E-07 | 9,67E-06 | A2M,ABCG1,ADAMTS1,AKAP12,ALDH1A1,ALPL,ATF3,BEC N1,BHLHE40,BIRC2,C1QB,C1S,CASP1,CCL20,CCN5,CDH3 ,COX6A2,CTLA4,ELN,EPCAM,FAS,FOSL1,FURIN,HMOX1,I SG15,KLF15,MMP1,MMP17,NFKB1,NFKBIA,NOS2,NR4A3, NTRK3,PCDHGB5,PER1,PIK3IP1,PLK3,PLXNB3,POSTN,PT PRO,RBFOX1,RNASE6,SEMA3B,SGK1,SHC3,SLC26A1,SO CS7,TNFAIP8,VCAM1,VCAN,WT1                                                                                                                                                                                                                                                          |
| L-methionine |        | chemical - endogenous mammalian |           | 0,326  | 0,286  | -0,012 | 2,99E-07 | 9,82E-06 | ALB,CCNB1,CCNB2,CDK1,CLU,DDIT3,F3,FANCL,G6PC,GA DD45B,HSPA5,IFI16,IGFBP4,MAT1A,NFKBIA,PCK1,PCK2,P RC1,RHOB,SOD2,SPHK2,SPP1,TYMS                                                                                                                                                                                                                                                                                                                                                                                                                                                 |
| cholesterol  |        | chemical - endogenous mammalian |           | 0,197  | 0,370  | 0,025  | 3,09E-07 | 1,01E-05 | ABCA1,ABCG1,ACAT1,ADAM11,APOB,APP,AQP8,ATF3,C ASP1,CAV2,CCL1,COL1A1,COL3A1,CYBB,CYP3A5,CYP7B 1,DBI,DCSTAMP,DDIT3,EPHX1,F3,FABP6,FN1,GLI3,GNAI1, GNMT,HBEGF,HSP90B1,HSPA5,IDI1,IHH,IL10RA,IL10RB,J AK1,KCNA5,KITLG,LAPTM5,LDLR,LEPR,LPL,LYZ,MANF,M APT,ME1,MITF,MME,MMP1,NCF2,NPC1L1,NR0B2,NR4A1, NR4A3,PLTP,RGS16,RHOA,SLC28A3,SLC2A4,STX3,TIMP1 .TMEM123,VCAM1                                                                                                                                                                                                                 |

|             |        |                                   |        |        |        |          |          |                                                                                                                                                                                                                                                                                                                                                                                                                                                                                                                                                                                                                                         |
|-------------|--------|-----------------------------------|--------|--------|--------|----------|----------|-----------------------------------------------------------------------------------------------------------------------------------------------------------------------------------------------------------------------------------------------------------------------------------------------------------------------------------------------------------------------------------------------------------------------------------------------------------------------------------------------------------------------------------------------------------------------------------------------------------------------------------------|
| HNF1A       | -0,233 | transcription regulator Inhibited | -3,719 | -3,171 | 0,074  | 3,21E-07 | 1,04E-05 | ADH6,AFP,AIMP1,AKR1C1,AKR1C2,ALB,ALDOB,ANPEP,ANXA4,APOB,APOC3,APOH,APOM,ATP4A,BMP3,C1S,C2,C8B,CDKN1B,CLIC5,COL3A1,COX6A2,CSHL1,CTS,CTS,CTS,CYB5A,DCT,DPP4,DTL,F11,FABP1,FAS,FBP1,FRK,FUT7,FXD3,G0S2,G6PC,GARS1,GATM,GCK,GCNT3,GLA,GLUL,GMDS,GN12,GRHPR,GSTA1,GTF2E1,HAO1,HGFAC,HNF1A,HNF1B,HNF4A,HNMT,HOPX,HPX,HSPA5,IHH,IL36A,INS,INSR,ITI4,KIF20A,LCT,LDLR,LIPA,MIA2,MLXIPL,MRPL15,MSH6,MT1X,NAT10,NOD1,NPC1L1,NR0B2,PAH,PAMR1,PCK1,PDHX,PFKP,PIGR,PKLR,PLA1A,PLG,PPP1R1A,PSMA5,RACK1,RO60,SEMA4A,SERPINA10,SERPING1,SLC10A1,SLC10A2,SLC26A1,SLC37A4,SLPI,SRI,SSTR4,SUPV3L1,TARS1,TEF,TMED10,TMEM140,TMPRSS2,TMPRSS4,TRPM2,UCP2,VLNIP |
| IKKBK       |        | kinase                            | 1,578  | 1,957  | 0,049  | 3,23E-07 | 1,04E-05 | ABCA1,AFP,ATF3,BAX,BIRC2,C3,CASP8,CCL1,CCL17,CCL20,CCL25,CCN2,CCNA2,CD44,CDC25B,CLU,CTSF,CTS,CXCL6,CYBA,CYP7B1,ECT2,EGR1,F3,FAS,FOS,FOXO1,GADD45A,GBP2,GCH1,GLI1,GM2A,GRN,HIF1A,HLA-A,HMOX1,IFI16,IL13,ISG15,ITGB3,JUNB,KIF20A,LCN2,LTB,MMP1,MX1,NFKB1,NFKBIA,NGF,NOCT,NOS2,NPPA,POSTN,PPM1D,PTEN,RBP1,RGS16,S100A4,SERPINE2,SGK1,SNAIL,SOCS2,SOD2,STAT3,TERF2IP,TLR3,TNC,TNFRSF11B,TP53,VCAM1,VCAN,VEGFA                                                                                                                                                                                                                               |
| IRF2        | 0,131  | transcription regulator Activated | 2,339  | 2,577  | 0,044  | 3,72E-07 | 1,18E-05 | B2M,BNIP3L,C1S,CASP1,CDKN1B,CFB,CIDEA,CLIC1,CTSS,DNAJB6,DPY19L1,ERAP1,FAM111A,GBP1,IFI35,IL7,IRF7,IRF8,ISG15,LCN2,MMP7,NAMPT,NOS2,OAS1,OPN3,PSMB10,PSMB8,PSMB9,PSME1,RARRES1,RRBP1,TAP1,TAPBP,TLR3,TNFSF10,TPM1,TRIM21,TXNRD1,UBE2L6,VCAM1                                                                                                                                                                                                                                                                                                                                                                                              |
| HNF1B       | 0,282  | transcription regulator           | -1,639 | -1,604 | 0,006  | 3,84E-07 | 1,22E-05 | ACTN1,AFP,ALB,ALDOB,ANXA4,BHLHE40,CA2,CD44,CD99,CDK1,CITED2,CLDN1,COL5A2,DEFB1,DUSP1,EXT1,F11R,FN1,FZD1,GATA6,GSTA1,HGFAC,HNF1A,HNF4A,IHH,ITGB6,LAMB1,LUM,MET,MMP7,MPZL2,PDE4C,PODXL,PSTPIP2,S100A2,S100A4,S100A6,SNAIL                                                                                                                                                                                                                                                                                                                                                                                                                 |
| CG          |        | complex                           | 0,031  | 0,482  | 0,052  | 4,41E-07 | 1,38E-05 | ADAMTS1,ADM,APLN,RB2M,BAX,BHLHE40,BHMT,BTG2,CDK4,CDKN1B,CLDN11,CLU,CTSV,CYP26A1,DBI,DDX25,DP1,DTL,DUSP1,EGR1,ELK3,EPHA7,ESM1,F2RL1,FAS,FGL2,FHL1,FJX1,FOS,FZD1,G0S2,G6PC,GATA6,GM2A,GTF2E1,HIF1A,HLA-A,HPGD,HSD11B2,HSD3B2,IFIT3,IGFBP4,INHA,ITGAV,ITGB3,KHK,LDLR,LEPR,LGALS3BP,MCAM,MMP1,MYCL,NOS2,NR2F1,NR4A1,NRP1,NUCB2,PAPPA,PCNA,PDYN,PECAM1,PODXL,PPARA,PPARG,RGS2,RORA,S100A10,S100A6,SACS,SLC5A5,SLC5A7,SMAD2,SMARCA1,SMARCA5,SPP1,SPRY2,SRD5A2,STEAP1,TFPI2,TGFBR3,TIMP1,TIPIN,TP53,TPSPAN13,VCAN,VEGFA                                                                                                                        |
| cholic acid |        | chemical - endogenous mammalian   | 1,441  | 1,523  | 0,016  | 4,45E-07 | 1,39E-05 | ABCA1,ABCC3,ABCC4,APOA1,APOM,CDX2,CYP2B6,CYP3A4,CYP3A5,CYP4A11,CYP7B1,EGF,EPHX1,FABP1,FABP6,FBP1,G6PC,LPL,MDK,MVP,NR0B2,PCK1,PLTP,RAD23B,RBP1,SLC10A1,SLC10A2,TM4SF5                                                                                                                                                                                                                                                                                                                                                                                                                                                                    |
| RBL2        | -0,071 | other                             | 1,094  | 0,749  | -0,070 | 4,84E-07 | 1,50E-05 | ATO1H,AURKA,CASP4,CASP6,CCNA2,CCNB1,CCNB2,CDK1,CDKN1B,CDX1,CDX2,DNMT1,E2F4,ELK1,FAS,FOXN1,GRPR,HADH,IVL,KPNA2,MAP2K3,MYBL2,MYOD1,PCNA,PIM1,PPP1R8,RB1,RRM2,STMN1,TEAD4,TERT,TP73,TYMS,VEGFA                                                                                                                                                                                                                                                                                                                                                                                                                                             |
| IRF7        | 0,451  | transcription regulator Activated | 5,494  | 6,039  | 0,080  | 4,94E-07 | 1,52E-05 | ADAR,APOBEC3G,CASP4,CTLA4,DDX58,FOXO3,FZD1,GBP1,IFI16,IFI35,IFI44,IFIH1,IFIT2,IFIT3,IFITM1,IFITM2,IL15,IRF7,IRF8,IRF9,ISG15,MX1,NAMPT,NMI,OAS1,PARP12,PDCC2,PHF11,PLSCR1,PSMB10,PSMB8,PSMB9,PSME1,RTP4,STAT1,TAP1,TDRD7,TMPO,TNFAIP8,TNFSF10,TOR1B,TPST1,TRIM21,TRIM22,TRIM5,UBE2L6,USP8,ZBP1,ZC3HAV1                                                                                                                                                                                                                                                                                                                                   |
| TCR         |        | complex                           | -1,600 | -1,235 | 0,050  | 5,07E-07 | 1,55E-05 | ABLIM1,ADM,ALDOA,ALOX12,APOC3,APOD,ARHGEF1,CCL1,CCL17,CCL22,CCR4,CD44,CD5,CD70,CDKN1B,CISH,CTLA4,DDX58,EBNA1BP2,EGR1,ELL2,ENO1,FAS,FOS,FOXP3,GADD45B,GADD45G,GLUD1,GRIA3,GZMA,HADH,HIF1A,HSP90B1,HSPA5,IFI44,IFIH1,IFIT2,IFIT3,IFNGR1,IL13,IL7,IRF7,ISG15,JUNB,KCNK5,LAMP1,LBR,LIPA,LTA,MAPK1,MAPK8,MX1,NAB2,NFKB1,NFKBIA,NME1,NR4A1,NRP1,OAS1,ODC1,P4HB,PDCC1,PDCC4,PDIA4,PIK3R3,PIM1,PRKACB,PTEN,PTPRC,RPL13A,SCARB2,SDCBP,SERPINA3,SOCS2,SP1,STAT1,STAT3,STAT5A,SYNCRIP,TALDO1,TBX21,TLR3,TOB1,TSC22D3,VDR,ZBTB32,ZBTB7B,ZC3HAV1                                                                                                     |

|           |        |                                 |           |        |        |       |          |          |                                                                                                                                                                                                                                                                                                                                                                                                                                                                                                                                                                                                                                                                                                                                                                                                                                                                                            |
|-----------|--------|---------------------------------|-----------|--------|--------|-------|----------|----------|--------------------------------------------------------------------------------------------------------------------------------------------------------------------------------------------------------------------------------------------------------------------------------------------------------------------------------------------------------------------------------------------------------------------------------------------------------------------------------------------------------------------------------------------------------------------------------------------------------------------------------------------------------------------------------------------------------------------------------------------------------------------------------------------------------------------------------------------------------------------------------------------|
| FOXO1     | 0,147  | transcription regulator         | Activated | 1,714  | 2,133  | 0,069 | 5,08E-07 | 1,55E-05 | ANXA1,CAT,CCNA2,CCNB1,CCNB2,CDC20,CDC25B,CDK1,CDKN1B,CDKN3,CKS2,ESR1,FOS,FOXO1,FUT4,FZD1,GLB1,HSD11B2,KIF20A,MAPK8,MET,MMP7,NBN,NES,NFKB1,PCNA,PECAM1,PRC1,PROM1,PTCH2,PTTG1,RMI1,SNAI1,SOD2,SQSTM1,STAT3,STMN1,TP53,VCAN,VEGFA,VIM                                                                                                                                                                                                                                                                                                                                                                                                                                                                                                                                                                                                                                                        |
| NGF       | -0,241 | growth factor                   |           | -2,041 | -1,709 | 0,049 | 5,11E-07 | 1,55E-05 | A2M,ADM,AGRN,ANXA2,APOBEC3G,APP,ASIC2,ASIC3,ATF3,BAX,BTG2,C1QL1,CD83,CDK1,CDKN1B,CHRN4,CRYAB,DHX9,DRD2,DUSP1,EGR1,ELK1,FAS,FOS,FOSL1,GADD45A,GCH1,GUCY1A1,GUCY1B1,HMOX1,JUNB,KIF2A,KLK3,LDLR,LRRFIP1,MACROD1,MAP3K12,MMD,NAB2,NOS1,NR4A1,PLG,PLK2,PPARG,PTEN,RAC1,RACK1,S1PR2,SEMA6D,SHC1,SHTN1,SQSTM1,STAT3,STMN4,TP73,TRPV1,TRPV4,VEGFA,WT1,ZWINT                                                                                                                                                                                                                                                                                                                                                                                                                                                                                                                                        |
| levodopa  |        | chemical - endogenous mammalian |           | -2,043 | -1,938 | 0,009 | 5,50E-07 | 1,66E-05 | ABI1,ADAR,ADGRB2,ALPL,APLP1,ARC,AREL1,BANF1,BAX,BICC1,C12orf43,C1GALT1C1,C1QA,C8B,CACNA1H,CAP1,CAPG,CAPN10,CASK,CASP3,CD63,CHAC1,CHRM2,CHST8,CINP,COL4A1,COMT,CRY2,CTNBP1,CTSZ,CYP2A6 (includes others),DDOST,DENND1C,DMTN,DNAJC2,DOC2B,DUSP1,EIF4G2,F11R,FAAH,FADD,FAM3A,FCGRT,FOS,FOSB,FOSL1,FOXO1,FRAT2,FSTL4,GABARAPL1,GADD45B,GLB1,GNAS,GNNG7,GOLIM4,GPC3,GPD1,GPS1,GRB10,GUCY1A1,HBEFG,HCLS1,HECW1,HEXA,HEXB,HLA-A,HRAS,HTATIP2,HTR1B,IFNAR2,INPP5F,INTS13,IQGAP1,ITGB1BP1,JUNB,KCNA5,KCNA6,KCNE5,KDM5B,KLF9,KYAT1,LAPTM5,LASP1,LPP,LRRC1,LYPD1,MAP3K1,MITF,MRPL33,NAB2,NEDD4L,NOCT,NTRK3,PALM,PAOX,PAR6A,PDZD4,PDYN,PDZD2,PER1,PER2,PFKP,PKP2,PLK2,PRL,PPRF18,PTPRT,PVALB,RAB8A,RC3H2,RESF1,RFC2,RTL8C,RUND3B,S100A10,S1PR2,SCRN1,SH3BGRL3,SH3GL2,SHC1,SLC1A2,SLC25A44,SRPK3,SUB1,SYN1,TBP,TCIRG1,TLE1,TMED10,TMEM106C,TNR,TP53,TRIOBP,UBE3C,UBF1,UBP1,VDL1,WDR1,WNT7B,ZNF284,ZNF76 |
| ERN1      | -0,079 | kinase                          | Activated | 2,281  | 2,504  | 0,041 | 6,33E-07 | 1,89E-05 | ACACA,ARF4,ATF3,BECN1,BLOC1S1,CDH6,DDIT3,DERL2,DNAJB9,DNAJC10,DNAJC3,EPCAM,FAS,G6PC,GOLGA3,HSP90B1,HSPA5,IFITM1,ITGB6,MLXIP,MPZL2,NARS1,NOS2,NPPA,P3H1,PPARG,PROS1,SDF2L1,SEC11A,SEC24D,SEC61A1,SLC25A28,ST14,SYT11,TBCB,TMED3,TMPRSS2,UBE2J1,USO1,VEGFA,WARS1                                                                                                                                                                                                                                                                                                                                                                                                                                                                                                                                                                                                                             |
| lfn gamma |        | complex                         | Activated | 2,243  | 2,472  | 0,043 | 7,04E-07 | 2,07E-05 | ADAR,APOBEC3G,BAG1,CASP1,CASP3,CDKN1B,CHI3L1,COL1A1,CSE1L,CYBB,ESR1,FAS,FN1,GBP1,HLA-DRA,IGFBP4,IL32,IRF8,LY96,MAP4K4,MAPK1,NOS2,NR4A3,PCK1,PPARG,PSME1,SOC5,STAT1,TACR2,TERT,TLR3,TNFSF10,VSIG4                                                                                                                                                                                                                                                                                                                                                                                                                                                                                                                                                                                                                                                                                           |
| EPAS1     | -0,138 | transcription regulator         |           | -0,698 | -0,325 | 0,060 | 7,27E-07 | 2,13E-05 | ABCG2,ABI1,ACACA,ADIPOQ,ADM,AKAP12,ALDOC,ATG5,BHLHE40,C1QA,CA9,CAT,CCN2,CCN5,CITED2,CLDN1,DDIT3,DECR2,ENO1,FABP2,FHL1,FN1,FOS,GADD45B,H1-2,HIF1A,HSPA4,HSPA5,ITGAV,ITGB3,LDLR,LEP,LPL,MAFF,MANF,MB,MYO7A,MYOM2,NAMPT,NDRG1,NFIL3,PLOD2,PPARG,PRKCA,SLC2A4,SOD2,SOX15,STC2,TERT,TMPRSS6,TNFRSF11B,TNNI1,TP53,TPP2,TRIM21,VEGFA,WNT10B,YAP1                                                                                                                                                                                                                                                                                                                                                                                                                                                                                                                                                  |
| HMGA1     | -0,067 | transcription regulator         |           | -1,217 | -1,069 | 0,024 | 7,51E-07 | 2,19E-05 | ALPL,B2M,CAV2,CD44,CLCN6,COL1A1,COL1A2,COL4A1,COL4A2,COX6A2,CRYAB,CSK,DDIT3,EGR1,ELK1,ESR1,FOS,FSTL1,GHR,HAND1,HS3ST1,IDI1,IER2,IGFALS,IGFBP4,IL15,INSR,JUNB,KITLG,KRT10,LAMB1,LTA,MAPT,NKX2-5,NOS2,PPARG,PTPRU,RAN,RHOB,SHC3,SOX4,STAT3,TNFB,WNT6                                                                                                                                                                                                                                                                                                                                                                                                                                                                                                                                                                                                                                         |
| EHF       | 0,303  | transcription regulator         |           | 0,625  | 0,786  | 0,030 | 7,84E-07 | 2,28E-05 | ALOX5,ANPEP,BLNK,CASP3,CCL20,CDH3,CDK1,CDKN1B,CRABP2,FOXN1,GLB1,HMOX1,HOPX,IL13,KLK3,KLK5,KLK6,KLK7,LYN,MET,MMP1,MUC1,NOTCH2,PGLYRP4,RHCG,SERPINA3,SPDEF,SPRR3,TFPI,TIMP1,TNC,VEGFA                                                                                                                                                                                                                                                                                                                                                                                                                                                                                                                                                                                                                                                                                                        |
| Creb      |        | group                           |           | -2,065 | -1,783 | 0,041 | 7,91E-07 | 2,29E-05 | AAS,ADIPOQ,ADM,ALOX5,ARPC5,ATF3,CACNA1S,CASP1,CD59,CGA,CIDEC,COMT,COX6A2,CTH,CTSV,CYP11B2,DUSP1,DYNC1LI2,EGR1,EGR3,FAS,FCER1G,FOS,FOSB,FOSL1,G6PC,GABRR2,GNAS,HLA-G,HPGD,HSPB8,IFI16,INHA,ITGA10,IVL,JUNB,LASP1,LDLR,LEP,MAPK8,MCAM,MCM3,MITF,MMP1,MUC5B,NMNAT2,NOX5,NR4A1,NR4A3,NRL,PCK1,PCNA,PDYN,PER1,PER2,PHRF1,PLIN3,PPARG,PPFIBP1,PRKCA,PRL,PSENNEN,PYCR1,RBFOX1,RGS2,SLC25A44,SLIT2,SOX4,SST,SSTR2,SYNPO,THAP1,TIA1,TMEM184C,TNFRSF11B,VEGFA,ZBP1                                                                                                                                                                                                                                                                                                                                                                                                                                   |

|           |        |                                   |           |        |        |        |          |          |                                                                                                                                                                                                                                                                                                                                                                                                                                                                                                                      |
|-----------|--------|-----------------------------------|-----------|--------|--------|--------|----------|----------|----------------------------------------------------------------------------------------------------------------------------------------------------------------------------------------------------------------------------------------------------------------------------------------------------------------------------------------------------------------------------------------------------------------------------------------------------------------------------------------------------------------------|
| MAPK9     |        | kinase                            |           | -0,686 | -0,469 | 0,034  | 8,34E-07 | 2,41E-05 | ACACA,BAX,CCN2,CD70,CDKN1B,CIDECD,EGF,EGR1,FAS,FGL2,FOS,FOSL1,FOXP3,GADD45A,GADD45B,HIF1A,IER2,IF16,IL18,IRF9,JUNB,JUND,LGALS3BP,LPL,LTA,LUC7L3,MARCKSL1,METAP2,MUC5B,NMI,NOS2,PDIA3,PLA1A,PPARA,PPARG,PPP1R15A,PTEN,RAC1,RAD23B,SEM1,SOD2,TBP,TBX21,TLR3,TP53,VDR,ZFP36                                                                                                                                                                                                                                             |
| HDAC4     |        | transcription regulator           |           | 0,554  | 0,447  | -0,029 | 8,51E-07 | 2,45E-05 | ARC,ATF3,CAMK2A,CAP2,CCNB1,CYFIP2,FOS,FOSL1,G6PC,GADD45A,HDAC1,HIF1A,HLA-DRA,KLHL2,MAPK1,MAPK10,MAPK8,MYH10,MYOG,MYOM2,MYOZ1,NBEA,NOS2,NR4A1,NRCAM,PRKCA,RGS2,RGS7,SH3GL2,SLC17A7,SLC2A4,SYN1,TERT,TP53BP1,TRPV1,TSPAN13,TSPAN7,VCAM1,VEGFA                                                                                                                                                                                                                                                                          |
| NR2F2     | 0,200  | ligand-dependent nuclear receptor |           | -0,557 | -0,557 | 0,000  | 8,64E-07 | 2,47E-05 | ALDH2,APOA1,APOC3,CYP11B2,GATA6,HNF1A,HNF1B,HNF4A,LIPC,LPL,LTFF,NPPA,NR2F2,NRP1,PCK1,PPARA,SHBG,VEGFA                                                                                                                                                                                                                                                                                                                                                                                                                |
| IL1A      |        | cytokine                          |           | 0,668  | 1,077  | 0,054  | 9,44E-07 | 2,66E-05 | ADAMTS1,ALDH1A1,ALDH1A3,ALDH3A2,APOD,APP,ASIC2,ASIC3,ATF3,BAX,BIRC2,BTN3A3,CA2,CCL20,CD44,CD83,CSF3,CXCL6,CYP2B6,CYP3A4,CYP3A5,DPP4,F2RL1,FAS,FOS,FOSB,FOSL1,GBP1,GCH1,HMOX1,HSD11B2,IFNGR1,IFNGR2,IK,IL13,IL18,IL32,IRAK1,ITGAV,ITGB3,JUNB,KITLG,LCN2,LEP,MCAM,MMP1,NFKB1,NFKBIA,NGF,NOS2,NR2F2,PPARG,RHCG,SERPINA3,SOD2,SPP1,SSTR2,TERF2IP,TLR2,TNFRSF11B,VCAM1                                                                                                                                                    |
| WT1       | -0,429 | transcription regulator           |           | -0,203 | -0,136 | 0,011  | 9,44E-07 | 2,66E-05 | ACTN1,AHCY,AMHR2,ANPEP,ANXA11,ARL2,ASNS,BTG2,CAPRIN1,CCN2,CD2AP,CDC73,CLIC1,CMPK1,COL4A1,CTSV,EGR1,ESR1,EXT2,FGF1,FIBP,FOSB,GRB10,HBEGF,HCFC1R1,HSP90B1,IDI1,INHA,INSR,IRF8,ITGB1BP1,JUNB,JUND,KRAS,MAPK8,MT1X,MTIF2,MYL6,NDRG1,NME1,NPHS1,ODC1,PCK2,PDIA4,PECAM1,PODXL,PPIB,ROCK1,SH3BP5,SPRY1,SQSTM1,TARS1,TERT,TRIM21,TYROBP,VDR,VEGFA,WARS1,WT1,YARS1,ZMIZ1                                                                                                                                                      |
| PPARGC1A  | -0,177 | transcription regulator Inhibited |           | -3,605 | -3,455 | 0,018  | 9,48E-07 | 2,66E-05 | ACACA,ACACB,ACAT1,ADAMTS1,ADGRG1,ADIPOQ,ALAS1,APOC3,APOD,BAX,BCAT2,C2,C3,CALM1 (includes others),CAT,CAV3,CCN2,COL1A2,COL6A3,CYP2A6 (includes others),CYP2B6,CYP3A4,CYP3A5,DIO1,DPT,DR1,ESRRA,G6PC,GAS6,GK,HSD3B2,IL18,INHA,INPP5J,ITGB1BP1,KYAT1,LAMB1,LDLR,LIPA,LIPC,LPL,LUM,MB,MCM3,MCM5,ME1,MITF,NPC1L1,NPPA,PCK1,PCK2,PDHA1,PDIA5,PDK2,PDK4,PHYH,PLA2R1,PNPLA2,POSTN,PPARA,PVALB,RXRA,SEMA3G,SERPINA3,SERPINE2,SIRT3,SLC2A4,SOD2,SYT2,TGFBR3,TIGAR,TIMP1,TNFRSF11B,TNFSF10,TNNI1,TP53,UCP2,VAMP2,VCAN,VEGFA,XDH |
| glutamine |        | chemical - endogenous mammalian   |           | 1,007  | 0,876  | -0,025 | 1,05E-06 | 2,92E-05 | AKR1C1/AKR1C2,ASNS,ASS1,ATG5,COL1A1,DDIT3,DUSP1,FN1,FOS,GADD45A,HIF1A,HK1,HSBP1,HSPA5,IL15,JUNB,LTA,NES,NFKBIA,NR4A1,PCK1,PCK2,PCNA,PROM1,PYCR1,SOX10,THBS2,TIMM17A,TP53,TUBB4A,VEGFA,VIM,WARS1,WT1                                                                                                                                                                                                                                                                                                                  |
| MTOR      | -0,088 | kinase                            |           | 1,405  | 1,566  | 0,023  | 1,15E-06 | 3,18E-05 | ACACA,ACACB,ADM,AKAP13,AKR1B1,ALDH1A3,ARL4C,CASP1,CASP3,CASP8,CAV3,CITED2,CTCF,DDIT3,DEFB1,EI3A,ENO1,FADD,FKBP1A,FN1,FOXP3,GLUD1,GSTM5,HIF1A,HK1,HSP90B1,IF16,IL13,INHA,IQSEC2,IRAK1,IRF8,KLK3,LEP,MAPT,MB,MLXIPL,MUC1,MYOG,NAB2,NOS2,OAS1,PCNA,PDHA1,PDHX,PDK2,PDK4,PECAM1,PFKP,PFN1,PKM,PLD2,PNLIP,PPARA,PPARG,PPIB,PRX,PTEN,RAB4A,RAP1,GDS1,RHOA,RORC,SERPINE1,SGCA,SLC12A2,SLC2A4,SLC8A2,SNCG,SND1,SOAT1,SOX4,SQSTM1,STAT1,STAT3,TBX21,TMPRSS2,TNFRSF11B,TNFSF10,TP53,UBE2C,VCAM1,VEGFA                          |
| TLR4      | 0,059  | transmembrane receptor            | Activated | 1,632  | 2,069  | 0,059  | 1,17E-06 | 3,21E-05 | ADM,APOBEC3B,APP,ATF3,BAX,C3,CASP7,CASP8,CAST,CCL1,CCL20,CD163,CD44,CD70,CERT1,CFB,CISH,CITED2,CLN3,CSF3,CXCL6,CYP27B1,CYP3A5,DDIT3,DUSP2,EGF,F3,FAS,FGL2,GADD45G,GBP2,HBEGF,HDAC1,HMOX1,HSPA5,HTRA1,IF16,IFIT2,IFIT3,IL13,IL15,IL18,IRF7,IRF8,ISG15,LCN2,LHB,LTA,MET,METT1,MMP1,MX1,NAA80,NFKB1,NFKBIA,NMI,NOS1,NOS2,NR4A1,NR4A3,NSMAF,PLA1A,PLK2,PPARG,RAC1,RGS16,RXRA,SGPL1,SH3BP5,SIRT3,SMAD3,SOD2,SPP1,SPTLC1,SPTLC2,STAT1,STAT3,STAT5A,TLR2,TLR3,TNFRSF13B,TNFSF10,TPM1,TRIM21,TRIM38                          |
| ATF4      |        | transcription regulator           |           | -0,849 | -0,445 | 0,067  | 1,19E-06 | 3,27E-05 | TSPO,HIC1,VCAM1,ABCA1,ABCG2,ASNS,ATF3,CA9,CANX,CDKN1B,CHAC1,CTH,DDIT3,FN1,FUT7,GADD45A,GARS1,GCH1,GRB10,HNF4A,HSP90B1,HSPA5,IHH,KLF9,MARS1,MITF,MTHFD2,NARS1,NDRG1,OSMR,PCK1,PCK2,PPARG,PPP1R15A,PRRX2,PSEN1,PYCR1,SLC38A3,SOD2,SST,STAT3,STC2,TKT,TNFRSF11B,VEGFA,WARS1,WNT1,XDH,XPO1                                                                                                                                                                                                                               |

|               |        |                                   |           |        |        |        |          |          |                                                                                                                                                                                                                                                                                                                                                                                                                                                                                                                             |
|---------------|--------|-----------------------------------|-----------|--------|--------|--------|----------|----------|-----------------------------------------------------------------------------------------------------------------------------------------------------------------------------------------------------------------------------------------------------------------------------------------------------------------------------------------------------------------------------------------------------------------------------------------------------------------------------------------------------------------------------|
| SMAD3         |        | transcription regulator           |           | -0,269 | 0,051  | 0,045  | 1,21E-06 | 3,30E-05 | ALB,APOA1,APOB,APOC3,C3,CCN2,CD59,CDK4,COL1A1,COL1A2,COL3A1,COL6A3,DDIT3,EGR1,ELN,ESR1,F12,FN1,FOS,FOXP3,G6PC,GADD45B,GAST,GLI1,GZMA,HBEGF,HMOX1,HNF4A,HSP90B1,HSPA5,IL13,IL15,INHA,JUNB,JUND,KLK3,LEFTY2,LHB,LUM,MMP1,MYOD1,NET1,NOS2,PCNA,PDCD1,PTPRK,RAC1,RHOB,S1PR4,SLC5A5,SMAD1,SNAI1,SPP1,SSTR2,STAT3,TBX21,TERT,TIMP1,TNC,TPM1,VEGFA,VIM,ZFP36                                                                                                                                                                       |
| HOXA10        | 0,235  | transcription regulator           |           | -0,270 | -0,444 | -0,026 | 1,26E-06 | 3,42E-05 | ADIPOQ,ADM,AIMP2,ALDH1A1,ALOX5AP,ALPL,ARL2,B3GALNT1,CFD,COL15A1,COL3A1,CSTA,CTSG,CTSV,CYBB,DDIT3,EIF3A,ELOC,FCER1G,FKBP3,FN1,FZD1,FZD5,GAS6,GSTA3,HLA-DQB1,ITGB3,KLF9,KRT4,LCN2,LEPR,LTF,LYZ,ME1,MMP26,MSN,NCF2,NR4A1,P4HB,PIGR,PRKCD,PROM1,PROS1,PTGER3,RBP1,TGFB3,TP53,WNT10B,XDH,ZNF22                                                                                                                                                                                                                                   |
| SRC           |        | kinase                            |           | -0,611 | -0,361 | 0,046  | 1,30E-06 | 3,53E-05 | ACAT1,CA2,CDK1,CGA,COL1A2,CSF3,CTSV,DUSP1,ENO1,F3,FN1,FOS,FOSL1,GBP1,HIF1A,INS,KLK3,LAMP1,LDLR,LHB,MMP1,MYOD1,MYOG,NFKB1,NPPA,POSTN,PRKCA,PRKCD,PRL,SPP1,STAT3,SYNPO,TFPI2,VCAM1,VEGFA,VIM                                                                                                                                                                                                                                                                                                                                  |
| AHR           | 0,308  | ligand-dependent nuclear receptor |           | -1,189 | -1,119 | 0,009  | 1,31E-06 | 3,54E-05 | A2M,ABCC4,ABCG2,ACACA,ACTL6A,ACTN1,ADM,ALB,ALDH2,ALDH3A1,ALOX5,APP,ATP4A,BAX,BTG2,BZW2,CAMK2N1,CASP8,CCL1,CCNA2,CCNB1,CDC25B,CDK1,CDK4,CDKN1B,COL1A1,COL1A2,COL3A1,COL4A1,COL4A2,COL5A2,COL6A3,CTSD,CYP2A6 (includes others),CYP2B6,CYP2C8,CYP3A4,DIO1,ENO1,ESR1,ESRRG,FAS,FN1,FOS,FOSL1,FOXP3,GADD45A,GAS6,GSTA1,GSTM5,HIF1A,HSPA5,ITGA6,ITGA7,JUNB,LTBP2,NFE2L2,NMT2,NNMT,NOS2,NPTX1,PCK1,PJA1,PKLR,PLXNA2,PPARG,PPP1R15A,PRL,RBP1,RDH16,RORC,SLC16A5,SNAI1,SNAT1,SOD2,SPP1,STAT3,TGFB1,TIPARP,TP53,TP73,TSPYL2,VEGFA,VIM |
| KITLG         | 0,309  | growth factor                     |           | 0,809  | 1,176  | 0,064  | 1,32E-06 | 3,54E-05 | ALOX5,ALOX5AP,B2M,BZW2,CA2,CASP1,CASP3,CCL22,CN2,CCNA2,CDKN1B,CIAPIN1,CISH,CLIC1,DHCR24,EGR1,FOS,FRK,GAS6,GCC2,HMOX1,HNRNP,IK,IL13,IL18,ITGA V,ITGB3,KPNA2,KPNB1,LAPTM5,LDLR,LTF,MME,NFKBIA,NPPA,PDCD4,PGLS,PIK3IP1,PIM1,PIWIL1,PKM,PLSCR1,PRKCA,PTGES3,RAB4A,RBBP7,SAMSN1,SHC1,SLC4A1,SNAP23,ST3GAL4,STAT3,TCF12,TERT,TSC22D3,UCP2,UGCG,WDR1,WEE1,ZNF207                                                                                                                                                                   |
| IRS1          | -0,035 | enzyme                            |           | -0,979 | -0,861 | 0,031  | 1,32E-06 | 3,55E-05 | ACACA,ACTR3,ADIPOQ,COL3A1,COL4A1,COL4A2,COL6A3,CRABP2,DBN1,DDIT3,EGR1,FHL1,FOS,G6PC,GCK,GLRB,HMOX1,IGFBP4,INS,INSR,LDLR,LPL,MYBL2,NR2F1,NRP1,PCK1,PPARG,PTPRF,SLC2A4,SNAI1,SPP1,TGFB1,TNNC1,TNNI1,TNNT2,UCP2,VEGFA,WNT6                                                                                                                                                                                                                                                                                                     |
| RHO           |        | G-protein coupled receptor        |           | -1,149 | -1,091 | 0,013  | 1,36E-06 | 3,64E-05 | APP,B2M,C1QA,CASP3,CASP7,CD44,CD74,COL1A2,CRABP1,CTSS,DDIT3,FOS,GNAT1,GNB1,H1-2,HCLS1,HMGB2,IMPDH1,LAMB2,PDE6A,PRPH,S100A6,SERPINE1,SGK1                                                                                                                                                                                                                                                                                                                                                                                    |
| CHUK          | 0,018  | kinase                            | Activated | 1,726  | 2,172  | 0,065  | 1,43E-06 | 3,80E-05 | ACKR3,ARL6IP5,ATF3,C3,CASP4,CCNB1,CDKN1B,CLU,COL18A1,CTSF,CTSZ,CXCL6,CYBA,CYP7B1,DNMT1,EGF,ENAH,F3,FAS,FOS,FOXC2,GADD45B,GBP2,GCH1,GM2A,GRN,HLA-A,HMOX1,IFI16,IFI35,IFIT2,IL13,ISG15,ITGB3,JUNB,LCN2,NFKBIA,NGF,NOCT,OVOL1,PCNA,PLSCR1,RB1,RBP1,RGS16,SERPINE2,SGK1,SNX10,SPP1,SQSTM1,TERF2IP,TLR3,TNFRSF11B,TP53,VCAM1,VEGFA                                                                                                                                                                                               |
| cyclic AMP    |        | chemical - endogenous mammalian   | Inhibited | -4,280 | -3,882 | 0,051  | 1,46E-06 | 3,86E-05 | ABCA1,APP,ARC,ASS1,CA2,CACNA1H,CCN2,CDK4,CDKN1B,CGA,CRYAB,CTLA4,CYP11B2,CYP2A6 (includes others),DCT,DDIT3,EGR1,EPCAM,ESRRA,EVX1,F3,FN1,FO S,G6PC,GATA6,GCH1,GCK,HBEGF,HIF1A,IGFBP4,IL15,INHA,INSR,JUNB,LPL,LGALS3BP,LHB,MEST,MITF,MME,MM P1,NGF,NOS1,NOS2,NR4A1,NTF3,OAT,ODC1,PAH,PCK1,PER1,PFKFB1,PRL,RORC,RXRA,SLC37A4,SLC5A5,SOD2,SST,STAT1,STAT3,TIMP1,TNFSF10,TP53,TRPV4,WNT10B                                                                                                                                       |
| palmitic acid |        | chemical - endogenous mammalian   |           | 0,776  | 1,009  | 0,032  | 1,61E-06 | 4,24E-05 | ACAA1,ACACA,ADIPOQ,AHR,ALDOA,APOM,ATF3,ATG5,BAX,BECN1,CASP3,CCN2,CYBA,CYBB,CYP4F12,DDIT3,EL OVL6,F2RL1,FABP1,FABP2,FN1,FOS,FOXO1,G6PC,GCK,HMOX1,HNF1A,HNF4A,HSPA5,IL6R,INS,INSR,LCN2,LPL,ME T,MLXIPL,NCF2,NFE2L2,NFKBIA,NOS2,NR4A1,NR4A3,PCK1,PKK4,PKLR,PNPLA2,PNPLA3,PPARA,PPARG,PTEN,SLC2A4,SQSTM1,TLR2,TNFSF10,TP53,UCLH1,UCP2,VCAM1                                                                                                                                                                                     |

|                            |        |                                 |           |        |        |        |          |          |                                                                                                                                                                                                                                                                                                                                                                                                                                                                                                                                                                                               |
|----------------------------|--------|---------------------------------|-----------|--------|--------|--------|----------|----------|-----------------------------------------------------------------------------------------------------------------------------------------------------------------------------------------------------------------------------------------------------------------------------------------------------------------------------------------------------------------------------------------------------------------------------------------------------------------------------------------------------------------------------------------------------------------------------------------------|
| CSF2                       |        | cytokine                        |           | 1,009  | 1,577  | 0,062  | 1,65E-06 | 4,29E-05 | ABCA1,ABCG1,ALOX5,ALOX5AP,ANXA1,AURKA,BAX,BID,C3,CASP1,CASP3,CCL17,CCL25,CCNA2,CCNB1,CD163,CD1A,CD1B,CD24,CD33,CD5,CD63,CD74,CD83,CDC123,CD20,CDK1,CDKN1B,CISH,CSF3,CTLA4,CYBB,DDIT3,EGR1,EGR3,ELN,EPCAM,F2RL1,F3,FANCL,FAS,FOS,FOSL1,FOXP3,GCH1,GK,HBEGF,HIF1A,HLA-DQB1,IK,IL13,IL15,IL32,IRAK1,ITGAE,ITGB3,JUNB,LEP,LTB,LY75,LY96,MAEA,MCM3,MCM5,MET,MMD,MME,MMP1,MNS1,NET1,NFKB1,NFKBIA,NOS2,NR4A1,NRP1,ODC1,OSMR,PDE1B,PIM1,PLAGL2,PPARG,PPIF,PPP1R15A,PRC1,PSENI1,PTK2,RB1,RRM2,SGK1,SLC2A4,SNAP23,SOCS2,SOD2,SPP1,SQSTM1,STMN1,TERT,TLR1,TLR2,TNFRSF10D,TP53,UBR1,URF2C,VDR,VTCN1,ZFP36 |
| NKX2-3                     |        | transcription regulator         | Inhibited | -2,211 | -2,200 | 0,001  | 1,65E-06 | 4,29E-05 | ACO1,ADM,ALPL,ANKRD55,APOBEC3G,ARHGDB,ASNS,CASP1,CAVIN2,CCNB2,CDKN3,CLEC1A,CRYAB,CXADR,DX58,DDX60,F2RL1,GBP1,GBP2,GCA,GCH1,GHR,GNG12,HCP5,HLA-B,HLA-C,HLA-F,KRT81,LYPD1,MMP7,NETO2,NR2F1,NT5DC2,PARP12,PLA1A,PLSCR1,POSTN,PSMB8,PSMB9,RTP4,SERPINE2,SLC25A28,SNCAIP,SP110,STAT1,SYT11,TAP1,TFPI2,TIPARP,TNFRSF10D,TRIM21,TRIM22,TRIM5,UBE2L6,VCAM1,ZC3HAV1,ZMAT3                                                                                                                                                                                                                              |
| 15-deoxy-delta-12,14-PGJ 2 |        | chemical - endogenous mammalian |           | 0,627  | 0,449  | -0,026 | 1,79E-06 | 4,63E-05 | BAX,BECN1,BIRC2,CASP3,CAV2,CCN2,CCNB1,CDK4,COL1A1,COL1A2,CTSD,CYBB,DDIT3,DDX58,E2F4,EGR1,ESR1,FABP2,FN1,FOS,GADD45A,GSTP1,HLA-DRA,HMOX1,KLK3,LAMP1,MMP1,MUC1,MYOD1,MYOG,NFE2L2,NFKB1,NFKBIA,NOS2,P4HA1,PARP1,PLAAT4,PPARG,PTGES2,RORA,SLC2A4,SOAT1,SPP1,STAT1,TBXA2R,TPR52,TP53,TXNRD1,VCAM1,VEGFA                                                                                                                                                                                                                                                                                            |
| IGF1R                      | 0,010  | transmembrane receptor          |           | -0,780 | -0,455 | 0,052  | 1,85E-06 | 4,78E-05 | ABCC4,ALDOA,ANXA3,APP,ATOH1,BAX,CALU,CAPG,CAVIN3,CBFB,CD48,CD53,CDK1,CDKN1B,CKS2,CLU,COL1A1,COL1A2,COL3A1,COL4A1,COL4A2,COX6A2,CSHL1,CTSD,DDIT3,DIO3,EGR1,ESR1,FOS,GCK,GHRH,GLI1,GRB10,HIF1A,HSPA5,HTRA1,IFNGR2,IGFBP4,KIF20A,KRT19,LASP1,MYOD1,MYOG,MYOM2,NME1,NR4A1,PDCCD10,PKM,PROM1,RAC1,RBBP7,RFC2,RHOA,RRAGC,S100A4,SNAI1,SNCG,SST,STAT3,TGFB1,TMEM87A,TNFSF10,TNNI1,TP53,TYMS,UBE2V2,VEGFA                                                                                                                                                                                             |
| IDH1                       | -0,129 | enzyme                          |           | 0,905  | 1,033  | 0,036  | 1,90E-06 | 4,89E-05 | CD47,CFD,CLDN3,CREB3L1,DDIT3,EGR1,FBP1,FN1,G6PC,GLI1,GLUD1,LEP,LPL,MAPK10,PKC1,PKM,PPARG,PPP1R15A,SLC2A4,TP53,VIM                                                                                                                                                                                                                                                                                                                                                                                                                                                                             |
| CDKN2A                     |        | transcription regulator         |           | -1,863 | -1,922 | -0,007 | 1,93E-06 | 4,96E-05 | A2M,BAX,BTG2,C3,CAPG,CASP3,CCL1,CCL22,CCN2,CCNA2,CCNB1,CCR4,CDC25B,CDK1,CDKN1B,CITED2,COL1A2,CUL1,CXCL6,DCK,DCTN4,DDR1,DEK,DUSP1,EED,EGR1,FAM111A,FANCL,FHL2,FOS,GADD45G,GLB1,GNAS,GNL3,HMGB2,IFI35,IL15,IL36A,ITGAV,ITGB3,KLK3,KRAS,LAMP1,LTA,MAD2L1,MCM5,MELK,MMP1,MYBL2,ODC1,PCNA,POLD3,PPFIBP1,PSMA5,PSMB9,PTEN,RAB27A,RB1,RBBP7,RF4,RMI1,RRM1,RRM2,S100A6,SAE1,TMPO,TOB1,TP53,TPM1,VEGFA,VIM,ZMAT3                                                                                                                                                                                       |
| CREM                       |        | transcription regulator         | Inhibited | -2,412 | -2,324 | 0,016  | 2,01E-06 | 5,15E-05 | ABCA1,ANXA4,APOLD1,ARC,ATF3,BHLHE40,BTG2,CCNB1,CGA,COL3A1,CRABP2,CYP11B2,DUSP1,EGR1,FOS,FUT7,GADD45B,GJD2,HLA-DRA,HSPA4,IDI1,INA,INHA,INS,IRAK1,JUNB,LDLR,MEST,MNS1,NAB2,NFIL3,NOS1,NOS2,NR4A1,PDYN,PER1,PPP1R15A,PRL,RHOB,SMC4,SST,TIPARP,VEGFA,ZNRF4                                                                                                                                                                                                                                                                                                                                        |
| GH1                        |        | growth factor                   | Inhibited | -2,843 | -2,762 | 0,014  | 2,06E-06 | 5,26E-05 | ABCC1,ATF3,CCNB1,CISH,CLU,CSHL1,CYP3A4,DBI,DDIT3,EGR1,FN1,FOS,GADD45A,GAST,GHR,GHRH,GT2H1,HDAC1,IGFALS,JUNB,LDLR,NOS2,NRAS,PTEN,RAD23B,RHOA,RYK,SMARCA4,SNAI1,SOCS2,SPP1,TAF9,TKT,VEZF1,VIM,ZFP36                                                                                                                                                                                                                                                                                                                                                                                             |
| S100A9                     | 0,438  | other                           |           | 1,553  | 1,728  | 0,026  | 2,11E-06 | 5,36E-05 | A2M,ABCG1,ADAMTS1,AKAP12,ALDH1A1,ALPL,ATF3,BECN1,BHLHE40,C1QB,C1S,C3,CASP1,CCN5,CDH3,COX6A2,CTLA4,ELN,EPCAM,FAS,FOSL1,FURIN,ISG15,KLF15,MMP1,MMP17,NOS2,NR4A3,NTRK3,PCDHGB5,PER1,PIK3IP1,PLK3,PLXNB3,POSTN,PTPRO,RBFOX1,RNASE6,SEMA3B,SGK1,SHC3,SLC26A1,SOCS7,TNFAIP8,VCAM1,VCAN,WT1                                                                                                                                                                                                                                                                                                          |
| PDX1                       |        | transcription regulator         |           | -1,269 | -1,153 | 0,020  | 2,11E-06 | 5,36E-05 | ACTG1,AKR1B1,ALB,ALDOB,ANXA2,ASNS,ATF3,ATG5,CAMK2N1,CAT,CD44,COL1A1,COL3A1,CRELD2,DNAJC10,EGFR1,F3,FGF1,FGF5,FUT1,G6PC,GCH1,GCK,GNAS,GNG12,GRN,HAP1,HK1,HNF4A,HSPA5,INS,JUNB,LRR49,LXN,MAPT,MITF,NFKB1,NNAT,PCNA,PDIA4,PDIA6,PPP1R1A,PTGER3,PTPRF,RHOBTB1,SPP1,SSBP3,SST,TGFB3,TIPRL,TPAN8                                                                                                                                                                                                                                                                                                    |

|                    |        |                                 |           |        |        |        |          |          |                                                                                                                                                                                                                                                                                                                                                                                                                                                                                        |
|--------------------|--------|---------------------------------|-----------|--------|--------|--------|----------|----------|----------------------------------------------------------------------------------------------------------------------------------------------------------------------------------------------------------------------------------------------------------------------------------------------------------------------------------------------------------------------------------------------------------------------------------------------------------------------------------------|
| RBL1               |        | transcription regulator         |           | -0,852 | -1,083 | -0,056 | 2,19E-06 | 5,50E-05 | CASP4,CASP6,CCNA2,CDK1,CDKN1B,E2F4,F3,FAS,FOS,F OXN1,H2AC8,IVL,KRT10,MCM2,MCM3,MCM5,MET,MYBL2,PCNA,PPP1R8,RB1,RRM1,RRM2,TERT,TP53,TP73,TYMS                                                                                                                                                                                                                                                                                                                                            |
| SEMA7A             | -0,192 | transmembrane receptor          |           | 1,151  | 1,437  | 0,080  | 2,32E-06 | 5,80E-05 | BAX,CCN2,CCN5,CCNA2,COL1A1,COL1A2,COL3A1,CTSS,EGR1,ELN,FN1,IL18,TIMP1                                                                                                                                                                                                                                                                                                                                                                                                                  |
| POU5F1             |        | transcription regulator         |           | 0,304  | 0,530  | 0,028  | 2,50E-06 | 6,19E-05 | AFP,AHR,ALB,ANKRD17,AQR,AXIN1,BAG1,BAX,BID,BIRC2,BNIP3L,CASP1,CASP10,CASP3,CASP6,CASP7,CD70,CDX2,CGA,CRABP2,CST6,CYP26A1,DLX5,DNMT1,DUSP1,EED,EPCAM,EVX1,EXT2,FABP1,FABP2,FADD,FARP1,FAS,FGF5,FOXF1,FUT4,GADD45A,GADD45G,GATA6,GCK,HAND1,HIF1A,HOPX,HOXB1,KLK14,LEFTY2,LOXL1,LTA,MYBL2,NFATC4,NR2F2,NRP1,OVOL1,PARP1,PECAM1,PODXL,PPARA,PPL,PRDM14,PROM1,PYCARD,SH3GLB1,SMAD1,SNAI1,SPP1,SPRR3,TDRD7,TGM1,TNFRSF11B,TNFSF10,TP53,TP53BP2,TP73,TXNRD1,VEGFA,VIM,WNT8B,YAP1              |
| SYVN1              |        | transporter                     |           | 1,533  | 1,998  | 0,074  | 2,62E-06 | 6,46E-05 | ABCC3,ABCC4,ADAM9,AHR,APP,BHLHE40,CALM1 (includes others),CD151,CD44,CDA,DUSP1,EMC7,EXT2,F3,FAS,HLA-A,HLA-C,HNRNPM,IFI44,IFITM2,ITGA6,ITGAV,KCNN4,LGALS3BP,MCAM,MYOF,NFE2L2,PFN1,PLD2,PNPLA2,PODXL,RPN2,SETX,SLC12A3,SLC27A3,SNAP23,TARS1,TNS4,ZC3HAV1,ZNF281                                                                                                                                                                                                                          |
| folic acid         |        | chemical - endogenous mammalian |           | 0,329  | 0,342  | 0,003  | 2,65E-06 | 6,52E-05 | ABCC1,ABCG2,APP,CLU,COL1A1,COL3A1,CSNK1A1,CYBB,DDIT3,DNMT1,FABP1,FN1,FZD1,FZD6,HDAC6,NOS2,PCNA,PECAM1,PLG,PSEN1,TP53,TYMS,VCAM1,WNT6                                                                                                                                                                                                                                                                                                                                                   |
| IRF5               |        | transcription regulator         | Activated | 3,771  | 4,082  | 0,061  | 2,67E-06 | 6,54E-05 | BAX,BID,CASP3,COL1A1,COL3A1,COL4A1,DAPK2,DDX58,FOXO1,IFI44,IFIH1,IFIT2,IFIT3,IRF7,ISG15,NAMPT,OAS1,PARP12,PDCC2,PLSCR1,SP110,STAT1,TMPO,TNFSF10,UBE2L6,USP8,VEGFA,YWHAE                                                                                                                                                                                                                                                                                                                |
| CHD4               |        | enzyme                          | Activated | 2,317  | 2,065  | -0,058 | 2,75E-06 | 6,68E-05 | ARC,CASQ1,CDA,CDKN1B,CPLX3,CPNE6,CPNE7,FAS,GNB3,HBB,HMOX1,IL13,NHLH1,NT5DC2,PDE1B,PRPH,RAD50,RORC,SPRY1,SYDE1,TBX21,TNNC2,TP53                                                                                                                                                                                                                                                                                                                                                         |
| ARNT               |        | transcription regulator         |           | -0,217 | 0,051  | 0,064  | 2,76E-06 | 6,68E-05 | ADM,AHR,ALDH3A1,ALDH7A1,ALDOA,ALDOC,BHLHE40,BHLHE41,CA9,CD81,CDK4,CITED2,CLDN1,CSF3,CTSD,CYP2A6 (includes others),DNAJC2,ENO1,ESRRG,FURIN,G6PC,GPI,GSTA1,HIF1A,HNF1A,HNF4A,INSR,ITGAV,ITGB3,KIF20A,LEP,MYL6,PCK2,TP53,UBE2C,VEGFA,VIM                                                                                                                                                                                                                                                  |
| EPO                |        | cytokine                        | Inhibited | -2,385 | -2,152 | 0,042  | 2,77E-06 | 6,68E-05 | B2M,BAX,BNIP3L,BZW2,CA1,CA2,CASP3,CD52,CDKN1B,CISH,CLIC1,CTSZ,CUL1,DCSTAMP,DDIT3,DHCR24,EGR1,FABP1,FAS,FOS,FOSB,G6PC,GCC2,GLUL,GYPA,HBB,HLA-DRB1,HNRNPF,IL18,ILF2,JUNB,KCNH6,KPNA2,KPNB1,LAPTM5,LDLR,MACROH2A1,MAN2A1,MIA2,MYOD1,MYOG,NAB2,NFKBIA,PCNA,PDCC4,PIK3IP1,PIM1,PLCB2,PRDM14,PRKCA,PRKCD,PTPRB,RAB4A,RHOA,ROCK1,SAMSN1,SLC4A1,SNAP23,SOCS2,SPP1,ST3GAL4,STAT3,TNFRSF11B,TNFSF10,TP53,TSC22D3,UCP2,UGCG,VEGFA,WDR1                                                            |
| MITF               | 0,269  | transcription regulator         |           | 0,158  | 0,683  | 0,071  | 2,78E-06 | 6,70E-05 | APOLD1,ATP6V1C1,BEST1,CA14,CCNB1,CD151,CD44,CD25B,CENPM,CLCN7,COL1A1,CTSG,DCSTAMP,DCT,ECT2,ESPL1,FN1,FOS,GAPDHS,GLI1,GM2A,GNPTAB,HIF1A,HPGD,IL6R,ITPKB,KCNN2,KIF20A,MC1R,MCM2,MCM5,MET,MGAT4B,MITF,MMS19,PLA1A,PMEL,POLE2,POLM,RAB27A,RFC5,RHOQ,RMI1,RPA3,SHTN1,SLC19A2,SNAI1,SNW1,SOX10,SOX13,ST3GAL6,STX7,TBC1D16,TBX2,TDRD7,TERT,TMEM251,TP53,UBE2C,YAP1                                                                                                                            |
| L-triiodothyronine |        | chemical - endogenous mammalian | Inhibited | -2,261 | -2,054 | 0,024  | 2,89E-06 | 6,94E-05 | A2M,ABCA1,ADIPOQ,ADM,AFF,ALB,ALDH1A1,APOA1,APOB,APOC1,APOC3,APOM,APP,ATIC,ATP1A3,BNIP3L,C1S,C A1,CCN2,CD44,CDKN1B,CGA,CLU,COL4A1,CSHL1,CTH,CYP27B1,CYP4A11,DIO1,DIO3,DUSP1,EGF,EGR1,ESR1,FABP1,FAS,FOS,G6PC,GCK,HIF1A,HR,IGFBP4,INHA,ITGA7,ITGAV,ITGB3,KLF9,LCT,LDLR,LEP,LYZ,MC4R,ME1,MGST3,MLXIPL,MYBPH,MYOD1,NKX2-5,NME1,NOS2,NR4A1,NRGN,NTF3,OAT,ODC1,PARP1,PCK1,PCK2,PDK2,PDK4,PER1,PITX3,PPARA,PPARG,PRL,PTGDS,PTTG1,RGS2,ROCK1,RYK,SEMA7A,SHBG,SLC2A4,SSR,ST3GAL4,THRR,TP53,UCP2 |

|                  |        |                                 |           |        |        |        |          |          |                                                                                                                                                                                                                                                                                                                                                                                                                                                                                                     |
|------------------|--------|---------------------------------|-----------|--------|--------|--------|----------|----------|-----------------------------------------------------------------------------------------------------------------------------------------------------------------------------------------------------------------------------------------------------------------------------------------------------------------------------------------------------------------------------------------------------------------------------------------------------------------------------------------------------|
| MYOD1            | -0,148 | transcription regulator         |           | -2,135 | -1,840 | 0,045  | 2,95E-06 | 7,06E-05 | ACACA,ACACB,ALDOA,ANKRD2,ASS1,CAV3,CBX5,CDH15,CDKN1C,CDX2,CHRND,COL4A1,CRYAB,DAO,DUSP1,ENO3,ESR1,FOSL1,FSTL1,GADD45A,GADD45G,GUCA2A,HA DH,HSPB8,IFI16,ITGA7,JUNB,MYBPH,MYCL,MYOD1,MYO G,NPTX1,PNP,POSTN,PTK2,RB1,RRAS,SCN4A,SGCA,SH3GLB1,SLC12A2,SLC2A4,SST,STAM,TGFBR3,TKT,TNNC1,TNNC2,TNNI1,TNNT2,TNS1                                                                                                                                                                                            |
| EIF4E            | 0,070  | translation regulator           | Activated | 2,182  | 2,680  | 0,080  | 2,97E-06 | 7,08E-05 | ATR,BCLAF1,BIRC2,CAPG,CD70,CDK4,CKS2,CSHL1,FGF5, FN1,FOSL1,GPS1,HIF1A,HMOX1,HRAS,IGFBP4,IL18,ILF2, LSM1,LSM7,NCK2,NFKBIA,NOP10,NOS2,NRAS,NRP1,ODC1,PCNA,PIM1,POP7,PRG2,PRL,PTGES3,RB1,SIRT2,SLC6A4,SNAI1,TGFBI,TNC,TP53,TP53BP1,TP53BP2,TRIP6,UBE2A,UBE2C                                                                                                                                                                                                                                           |
| CD28             |        | transmembrane receptor          |           | -0,124 | 0,311  | 0,050  | 2,98E-06 | 7,08E-05 | ACTR3,AHR,ANXA1,ARHGDI1,BHLHE40,C2,CAMK2A,CASP3,CASP6,CASP8,CCR4,CDK4,CDK7,CDKN1B,CISH,CNIH4,CRLF2,CTLA4,DAD1,DDX58,DUSP22,E2F4,FCER1G,FOS,FOXP3,GBP1,GBP2,GLI1,GNL2,GTF2IRD1,GTPBP4,GUCY1B1,GZMA,HAT1,HAX1,HCCS,HLA-DQB1,IFITM1,IFNGR1,IL10RA,IL10RB,IL13,IL7,ILF2,IRF8,KDELR2,LTA,MACROH2A1,MAP3K10,NAMPT,NFKB1,NFKBIA,NOS1,NR4A1,ODC1,PDCC1,PKLR,PLA2R1,PNP,PPA1,PRDX4,PSMA5,PSMA6,PTEN,RAD23B,RHOC,RORA,RORC,RYK,SEC61B,SH2D2A,SNRPB,SOCS2,SSB,STAT3,TBX21,TFPI2,TNFSF10,TOR1,TRIM24,TSTA3,VRP1 |
| POR              | -0,004 | enzyme                          |           | -1,362 | -1,479 | -0,029 | 3,00E-06 | 7,10E-05 | ABCA1,ABCC3,ACTG1,AHR,ALDH1A1,ANXA5,AQP8,ASNS,CD74,CLDN3,CSAD,CYP26A1,CYP2A6 (includes others),CYP2B6,CYP2C8,CYP4A11,CYP7B1,DHCR24,ELOVL1,ELOVL6,FABP2,FGF1,GADD45B,GBP2,GCK,GSTA3,GS TM5,HIF1A,HLA-A,HLA-DMA,HLA-DQB1,HMOX1,IDI1,IHH,LDLR,LGALS1,LPL,NAA80,NOCT,NROB2,PDK4,PGD,PPARG,SERPINA3,STAT1,TMEM184C, TMEM267,UBD,VEGFA                                                                                                                                                                    |
| TSC2             | -0,100 | other                           |           | -1,504 | -1,726 | -0,039 | 3,08E-06 | 7,26E-05 | A2M,ANXA1,ANXA2,ARC,ATF3,BAX,CASP1,CDKN1B,CEACAM4,CRYAB,CST6,DDIT3,EGR1,EMP3,FOS,GLA,HIF1A,HMOX1,HSPA5,NEU1,NIBAN1,NTRK3,OLFM4,PDK4,PLP2,PRELP,PRKCA,PSMA1,PSMD1,PSMD14,PTEN,PVALB,S100A11,S100A6,SOD2,STAT1,UCP2,VAMP8,ZFP36                                                                                                                                                                                                                                                                       |
| SOD1             | -0,061 | enzyme                          |           | -1,097 | -1,219 | -0,047 | 3,31E-06 | 7,76E-05 | ACO1,ALDOC,APP,ASS1,ATF1,ATP1A3,B2M,BAX,BID,C1QA,CA7,CACNB4,CASP1,CASP3,CASP4,CAST,CCNC,CDK4,CGA,CLU,COL1A1,COMT,CRYAB,DAO,DCXR,DSG3,FGF6,FOS,GNAS,GNB1,GNG7,GSTM5,GSTP1,HMOX1,HSBP1,HSPA4,HSPB8,IL15,JPT1,JUNB,LPL,MET,NETO2,NFE2L2,NFIL3,NOS1,NOS2,P2RX4,PLCB4,PRPH,PSMB8,RAC1,RGRIP1,SH3BGL3,SLC1A2,SNCG,SOD2,SPP1,SQSTM1,STMN1,TP53,TUBB4A,VCAM1                                                                                                                                                |
| Mek              |        | group                           |           | -1,133 | -0,947 | 0,027  | 3,44E-06 | 8,04E-05 | ABCE1,ABCG2,ACAT1,ANPEP,BECN1,BID,CCN2,CDKN1B,CDX2,CLU,COL1A2,CRYAB,DCT,DDR1,DDX58,DNMT1,EGR1,EGR3,ESR1,FGFBP1,FOS,FOSL1,FOXP3,GBP2,GNL3,HAND1,HIF1A,IER2,IL15,ITGA6,ITGB3,IVL,JUNB,LEP,LHB,MAFF,MANSC1,MST1R,NES,NGF,NR4A1,PIWIL1,PMEL,PRL,PSEN1,PTEN,PUS7,RABGGTB,ROCK1,SACS,SH2B3,SLC5A5,SNCG,SPRY1,SPRY2,SPRY4,TP53,VIM                                                                                                                                                                         |
| 26s Proteasome   |        | complex                         |           | -0,023 | -0,253 | -0,036 | 3,47E-06 | 8,10E-05 | AHR,ATG5,BAX,BIRC2,CCNA2,CDK1,CDKN1B,CLCN7,CTSA,CTSD,CTSF,DDIT3,DDX58,EGF,ESR1,FOSL1,FOXO1,GC H1,HBEGF,HMGB2,HSBP1,HSPB8,IFI35,JUNB,LAMP1,MAD2L1,NFKB1,PRKCA,PSMC4,PTEN,RB1,SMAD2,SNAI1,SQSTM1,STAT1,STAT5A,TNFSF10,TP53,UBD,UBE2I,UBFD1,VI M,WBP2                                                                                                                                                                                                                                                  |
| MTPN             |        | transcription regulator         | Activated | 2,854  | 3,270  | 0,080  | 3,51E-06 | 8,17E-05 | ANXA1,APOD,BAX,CASP3,CASP7,CASP8,CASQ1,CCNA2,CCNB1,CCNB2,CCNC,CDK1,COL1A1,COL1A2,FADD,FAS, FN1,FOS,GAS6,LTB,NFKB1,NPPA,S100A10,S100A6,SPP1, TNFSF10,TUBA1A,VCAM1                                                                                                                                                                                                                                                                                                                                    |
| PTH              |        | other                           |           | 0,382  | 0,655  | 0,048  | 3,56E-06 | 8,27E-05 | ADAMTS1,ALPL,BHLHE40,CCN2,CCN5,CDKN1B,COL1A1, COL1A2,CYBA,CYP24A1,CYP27B1,CYP3A4,DDIT3,DUSP1, FN1,FOS,FOSB,GALNT3,GNG12,HSPA5,IL6R,ITGAV,MEPE, MME,MMP1,NFIL3,NR4A1,ODC1,PALM,POSTN,PPP1R1A, RGS2,SEC61B,SLC2A4,SLC34A1,SPP1,ST14,TFPI2,THBS4, TNFSF11B,TNS1,TRPV5,VDR,WIF1,WNT10B                                                                                                                                                                                                                  |
| arachidonic acid |        | chemical - endogenous mammalian |           | -0,583 | -0,511 | 0,014  | 3,61E-06 | 8,35E-05 | ABCA1,ABCG1,ACACA,CD83,CLU,COL1A2,DDIT3,DNAJB9, EGR1,ELOVL6,F3,FABP1,FAS,FOS,FOSL1,GLI1,HMOX1,LDLR,NFKBIA,PECAM1,PKLR,PLTP,PNPLA2,PPARG,PRKD1,RGS2,RXRA,SLC2A4,SOAT1,UCP2,VCAM1,VIM                                                                                                                                                                                                                                                                                                                 |
| NCOR1            |        | transcription regulator         | Activated | 2,267  | 2,121  | -0,052 | 3,64E-06 | 8,38E-05 | ADIPOQ,AFP,AZGP1,CCNA2,CDKN1B,CEBPE,CGA,DBI,DHCR24,DIO1,DUSP1,FXDY3,G6PC,HK1,CLK3,LYZ,MB,ME1, MME,MRPL49,MT1X,MYOD1,MYOG,NDRG1,PDK4,PFKFB1, PPARG,PRKCD,STK39,WARS2                                                                                                                                                                                                                                                                                                                                 |



|                       |        |                                   |           |        |        |        |          |          |                                                                                                                                                                                                                                                                                                                                                                                                                                                                                                           |
|-----------------------|--------|-----------------------------------|-----------|--------|--------|--------|----------|----------|-----------------------------------------------------------------------------------------------------------------------------------------------------------------------------------------------------------------------------------------------------------------------------------------------------------------------------------------------------------------------------------------------------------------------------------------------------------------------------------------------------------|
| TCF                   |        | group                             |           | -1,248 | -1,091 | 0,080  | 3,64E-06 | 8,38E-05 | AKAP13,ALDH1A1,ALDH3A2,APOD,CCT8,CD44,CRAT,CYP24A1,DPEP1,EGR1,EPCAM,EPHB3,FOS,GAD1,HTRA1,IFI TM1,IHH,JUNB,KLK3,MME,MMP7,MUC6,NRCAM,PLS3,QPCT,SERPINA3,SFN,SLC26A2,TSPAN8,UGCG                                                                                                                                                                                                                                                                                                                             |
| NR0B2                 | -0,721 | ligand-dependent nuclear receptor | Activated | 4,189  | 3,903  | -0,063 | 3,88E-06 | 8,88E-05 | ABCA1,ACACA,APOA1,APOM,BAAT,CEL,CYP11B2,CYP7B1,EGR1,ESRRG,FBP1,G6PC,GCK,HNF1A,HNF4A,NR0B2,P4HB,PCK1,PCK2,PDIA3,PDIA4,PKD4,PPARG,SLC10A1,SLC10A2,SPP1,TIMP1                                                                                                                                                                                                                                                                                                                                                |
| CYP27B1               | -1,287 | enzyme                            |           | -1,198 | -1,270 | -0,021 | 3,92E-06 | 8,94E-05 | ALPL,CCL1,CCL17,CCL20,CCR4,CTLA4,CYP27B1,CYP3A4,CYP3A5,IL15,IL18,SLC34A1,SPP1,TLR2,TRPV5,VDR                                                                                                                                                                                                                                                                                                                                                                                                              |
| EZH2                  | 0,264  | transcription regulator           |           | 0,475  | 0,477  | 0,000  | 3,95E-06 | 8,97E-05 | ACKR3,ADAM10,ALOX5AP,ALPL,ATF3,ATOH1,BMP7,BMPR1B,C3,CACNA1E,CACNG4,CD63,CD70,CDK4,CDKN1B,CDX2,CER1,COL4A1,CPD,CSF3,CSNK1A1,CTNNA1,CUL1,DNMT1,EGR1,EVX1,FBN1,FGF5,FHOD3,FOXP3,FZD1,GABRA2,HCP5,HOXA10,HOXB6,HOXC13,HSD11B2,IL10RA,IL13,IL36A,KLK3,KRAS,KRT81,LCN2,LTB,MMP7,MPZL2,MYL6,MYOY1,NDRG1,NES,NFKBIA,NME1,NME5,NOTCH2,PARP12,PER1,PER2,PIK3IP1,PLAAT4,PPARG,PRG2,PRL,PROM1,PSMD1,PTEN,RNASEH1,S100A4,SFN,SGPL1,SNAI1,SOX10,SPOCK2,STT3A,TBX21,TMPRSS2,TP53,TRIM38,TSPAN7,IRF7,VFGFA,WIF1,WNT10R    |
| chenodeoxycholic acid |        | chemical - endogenous mammalian   |           | 0,210  | 0,333  | 0,023  | 4,10E-06 | 9,28E-05 | ABCA1,ABCC3,ABCG1,APOA1,APOB,APOM,COL1A1,CYP3A4,CYP3A5,EGR1,FABP6,FBP1,G6PC,HNF1A,HNF4A,HPGD,LDLR,LIPC,NR0B2,PCK1,PCK2,PKD4,PLTP,PPARA,SLC10A1,SLC10A2,SNAI1,TXNRD1,VDR                                                                                                                                                                                                                                                                                                                                   |
| IL27                  |        | cytokine                          | Activated | 3,502  | 3,765  | 0,044  | 4,11E-06 | 9,28E-05 | AHR,B2M,CCL16,CCL20,CD163,CD63,CD74,CDK4,CKLF,CTLA4,EGR1,FOS,FOXP3,GADD45G,GBP2,HLA-A,HLA-B,HLA-C,HLA-DMA,HLA-DMB,HLA-DPA1,HLA-DQB1,HLA-DRA,HLA-E,HPGD,IL10RB,IL13,IL18,MX1,NOS2,OAS1,PIM1,PLAAT4,RORC,STAT1,TAP1,TBX21,TLR3,TNFSF10,UBD,VCAM1,VIM                                                                                                                                                                                                                                                        |
| E2F3                  | 0,111  | transcription regulator           |           | 0,744  | 0,962  | 0,038  | 4,24E-06 | 9,54E-05 | AKR1C1/AKR1C2,BECN1,CASP7,CAV2,CCL20,CCNA2,CCNB1,CCNB2,CDK1,COL18A1,CSHL1,DEK,ECHDC2,EED,FAM102A,FOXN1,H1-2,HMGB2,KRAS,LBR,LEP,LPL,MAD2L1,MCM2,MCM3,MCM5,MT1X,MYBL2,NCAPG2,PCLAF,PCNA,PLCB4,PPP1R8,PTGER3,PTTG1,RB1,RBPMS,RRM1,RRM2,TERT,TM9SF2,TMPO,TOP2B,TP53BP2,TP73,UBE2C,WFDC2,ZNF76                                                                                                                                                                                                                 |
| STAT5A                | -0,279 | transcription regulator           | Inhibited | -2,909 | -2,818 | 0,017  | 4,28E-06 | 9,55E-05 | A2M,ADIPOQ,AGR2,ALDH3A1,BAX,CASP3,CASP4,CASP6,CASP8,CD24,CD70,CDC7,CDH17,CDK4,CDKN1B,CISH,CSF3,CYP27B1,ESR1,FAS,FCER1G,FGFBP1,FOS,FOSB,GADD45A,GADD45G,GCNT3,GZMA,H1-2,HOXB6,HSD3B2,IFITM2,IGFALS,IL6R,KLK3,LCN2,LTA,LTB,LY6G6D,MMP7,OAS1,PIM1,PIP,PLAAT4,PPARG,PRL,PSMB8,QPCT,RNF39,RO60,RORA,RPA1,SELENBP1,SERPINA3,SH3GL2,SLC10A1,SLC34A2,SLC7A7,SOCS2,STAT5A,TBX21,TGFB1,TNNC1,TNNI1,TP53,TSPAN13,TSPAN8,WARS1,ZFP36                                                                                  |
| PSEN1                 | 0,214  | peptidase                         |           | 0,077  | 0,029  | -0,009 | 4,47E-06 | 9,92E-05 | ABCC6,ABCG1,ABCG2,ACTG1,ALB,ALDOA,AMPH,APP,ARCA,ARF4,ATP1A3,ATP4A,BAX,C1QA,C1QB,C1R,C1S,C3,CALML3,CANX,CAP1,CASP3,CD74,CDX1,CLTB,CTSD,CTSS,CTSZ,CYFIP2,DBI,DNM1L,DPYSL2,DSTN,DUSP1,EGR1,ENO1,EPM2A,ERMP1,FKBP1A,FOS,GADD45B,GNB1,GPX5,GSTP1,HAND1,HK1,HLA-E,HSPA5,INSR,IRF7,MAPK1,MAPT,MME,NDUFS6,NME1,NOS1,NOS2,NTF3,OCEL1,PAK3,PEA15,PKM,PPARG,PRC1,PSEN1,PSENE1,PTPRF,PVALB,RHOQ,SCN10A,SH3GL2,SLC1A2,SQSTM1,STMN1,SUCLG1,SYN1,TIPARP,TOP2B,TP53,TP73,TUBA1A,TUBA1B,TUBB,TUBB6,UCHL1,VAMP2,WARS1,YWHAF |
| TFRC                  | -0,144 | transporter                       |           | -0,732 | -1,043 | -0,065 | 4,59E-06 | 1,01E-04 | ADGRG1,ANXA2,ATF3,CASP3,CCNA2,CCNB1,CDC20,CDK1,CHAC1,CSTF2T,DDIT3,FOS,GADD45A,GPX7,HMOX1,HPA5,ITGB2,LY75,ME1,MS4A6A,PIP5K1B,PPARG,PPP1R15A,STC2,TNFSF10,TP53,TREML2,UBE2E1                                                                                                                                                                                                                                                                                                                                |
| RAS                   |        | group                             |           | -1,676 | -1,404 | 0,052  | 4,60E-06 | 1,01E-04 | ANPEP,AURKA,B4GALT5,CCN2,CDKN1B,CDX1,CDX2,CYP24A1,EGR1,FN1,FOS,FOSL1,GBP2,GSTP1,HMOX1,IVL,LDLR,LHB,MET,MITF,MMP1,MUC5B,NFKB1,NOS2,ODC1,PDCD4,PRL,PSMD10,PTEN,RAE1,SERPINE2,SNAI1,SOD2,STAT1,TBP,TFPI2,TP53,VEGFA,VIM                                                                                                                                                                                                                                                                                      |
| mir-8                 |        | microRNA                          |           | -0,911 | -1,201 | -0,050 | 4,60E-06 | 1,01E-04 | ADAMTS1,ATF3,ATG5,BAX,BST1,CD47,CDC25B,CITED2,CLDN3,DLX5,DNAJC3,DUSP26,EPCAM,ESM1,HIF1A,HMOX1,KITLG,LEPR,LSR,MAP3K1,MMP1,MPRIIP,MYH10,MYOF,PEPR,PTEN,SEC23A,SMAD2,SNAI1,SPRY2,SQSTM1,STAT5A,TOB1,TSPAN1,UBE2D1,VIM,YAP1,YWHAB,ZFP36                                                                                                                                                                                                                                                                       |

|                |        |                         |           |        |        |          |          |                                                                                                                                                                                                                                                                                                                                                                                                                                                                                                                                                                                                                                           |                                                                                                                                                                                                                                                                                                                                                                                                                                                                                              |
|----------------|--------|-------------------------|-----------|--------|--------|----------|----------|-------------------------------------------------------------------------------------------------------------------------------------------------------------------------------------------------------------------------------------------------------------------------------------------------------------------------------------------------------------------------------------------------------------------------------------------------------------------------------------------------------------------------------------------------------------------------------------------------------------------------------------------|----------------------------------------------------------------------------------------------------------------------------------------------------------------------------------------------------------------------------------------------------------------------------------------------------------------------------------------------------------------------------------------------------------------------------------------------------------------------------------------------|
| Immunoglobulin |        | complex                 | -0,714    | -0,708 | 0,001  | 4,77E-06 | 1,04E-04 | ACACA,ACKR2,ACO1,ADIPOR1,ADM,ANPEP,APP,CAPG,CASP4,CCL1,CCL17,CCL22,CD44,CD74,CD83,CDK4,CDKN1B,CDKN1C,CHN2,CISH,CLCA1,CTH,CTS2,CXCL6,CYP27B1,DPYSL2,DUSP1,EGR1,EGR3,ENO1,ENO3,EXT1,F3,FAIM,FAS,FBP1,FCER1G,FOS,FOSB,FOXP3,G6PC,GCK,GPI,GSK3A,HLA-DQB1,HMOX1,HSD11B2,HSPA6,IFI30,IFNGR2,IGFBP4,IL10RA,IL10RB,IL13,IL17RB,IL18,IL25,IL32,IMPDH2,IRAK1,IRF7,ITGAE,ITGB8,LCN2,LILRB3,LTA,MAFF,MAPT,MMP1,MTHFD2,NAMPT,NCF2,NDUFS6,NFIL3,NFKBIA,NOS1,NOS2,NR4A1,NRP1,PCK1,PCK2,PDCD1,PDHA1,PDIA6,PK4,PHKB,PKLR,PLSCR1,PPA1,PYGM,RB1,RGS16,RGS2,RORC,RPIA,RRBP1,SOD2,SPP1,STAT3,SUCLG1,TALDO1,TBX21,TGFBF3,TIMP1,TLR2,TXNRD1,UBD,VCAM1,VCAN,VEGFA |                                                                                                                                                                                                                                                                                                                                                                                                                                                                                              |
| E2F4           | -0,197 | transcription regulator | -0,793    | -0,733 | 0,022  | 4,77E-06 | 1,04E-04 | ALG5,BECN1,BUB3,CALM1 (includes others),CASP4,CASP6,CBX5,CCNA2,CDK1,CEP57,CFAP20,CKS2,DROSHA,ECT2,EFHC1,EXOSC8,FAS,FOXN1,FPGT,GINS1,HMGB3,HSP90B1,MAD2L1,MCM3,MCM5,MSH2,MYBL2,NAP1L4,NDC80,PCLAF,PCNA,PCSK1N,PLSCR1,PPARG,PPP1R8,PRC1,PTTG1,RB1,RFC2,RFC4,RPA3,RRM1,RRM2,SMARCA5,SMC4,STAM,STMN1,TEAD4,TERT,TMPO,TP2B,TP53,TP53BP2,TP73,UBE2C,ZNF267,ZNF83                                                                                                                                                                                                                                                                                |                                                                                                                                                                                                                                                                                                                                                                                                                                                                                              |
| PIK3R1         | 0,126  | kinase                  | 1,227     | 1,511  | 0,057  | 5,11E-06 | 1,11E-04 | CDKN1B,COL1A2,DDIT3,DNAJB9,DNAJC3,F3,FOS,FOXO1,GCH1,HIF1A,HMOX1,HSP90B1,HSPA5,IRF7,ISG15,MITF,NFE2L2,NOS2,PCK1,PDHA1,PKM,PPARG,PTEN,SLC5A5,SOX2,VCAM1,VEGFA                                                                                                                                                                                                                                                                                                                                                                                                                                                                               |                                                                                                                                                                                                                                                                                                                                                                                                                                                                                              |
| LGALS3         | -0,080 | other                   | 0,138     | 0,213  | 0,017  | 5,25E-06 | 1,14E-04 | ABCC1,ADIPOQ,BAX,CASP3,CCNB2,CDKN1B,COL3A1,COL4A1,COL5A2,CTSF,CTSV,DDOST,FN1,IL13,ITGA10,ITGA6,ITGAV,KRAS,KRT19,LAMP1,MAP3K10,MUC1,NOS2,NRAS,PNPLA2,PPARG,PRSS3,PTEN,RAC1,RB1,VCAM1                                                                                                                                                                                                                                                                                                                                                                                                                                                       |                                                                                                                                                                                                                                                                                                                                                                                                                                                                                              |
| PRKCD          | -0,382 | kinase                  | -0,249    | 0,010  | 0,038  | 5,73E-06 | 1,23E-04 | ABCA1,ALOXE3,ARHGAP32,BIRC2,CCL20,CCNA2,CD70,COL1A1,COL1A2,DDIT3,FBN1,FOS,FOSL1,FZD1,GLI1,IL13,IL32,IVL,JUNB,LAMP1,LDLR,MPZ,MUC5B,NES,NFKBIA,NOC,T,NOS2,NOTCH2,NR0B2,NR4A1,OAS1,ODC1,PDCD4,PLA2,PLSCR1,PPP1R15A,PRL,PROM1,SLITRK3,SPRY1,STAT3,TLR2,TNFRSF11B,TP53,TPBG,TRIM48,UGCG,VCAM1,VEGFA,ZFP36                                                                                                                                                                                                                                                                                                                                      |                                                                                                                                                                                                                                                                                                                                                                                                                                                                                              |
| SMAD7          | -0,235 | transcription regulator | -0,197    | -0,339 | -0,022 | 5,96E-06 | 1,28E-04 | ALDOB,APOC3,BIRC2,BMP5,BMP7,BMPR1B,BZW2,CCN2,CCNA2,CCNB1,CDK1,CDKN1B,CITED2,COL1A1,COL1A2,COL3A1,COL6A3,FAS,FGF5,FN1,FOXO1,FURIN,GADD45A,GAS6,HBEGF,HMOX1,ITGA6,ITGA7,LTBP2,MET,MMP1,NET1,NFKBIA,NOS2,PCNA,PROM1,RAC1,SLC5A5,TERT,TGFBI,TIMP1,VEGFA                                                                                                                                                                                                                                                                                                                                                                                       |                                                                                                                                                                                                                                                                                                                                                                                                                                                                                              |
| Mapk           |        | group                   | Inhibited | -2,834 | -2,505 | 0,072    | 6,27E-06 | 1,34E-04                                                                                                                                                                                                                                                                                                                                                                                                                                                                                                                                                                                                                                  | APOA1,APOC3,APP,ARC,CAT,CDKN1B,CHRN4,COL1A1,CYBB,EGR1,ESR1,F3,FOS,FURIN,HMOX1,HPGD,JUNB,LEP,MMP7,NOS1,NOS2,NR4A3,PER1,PER2,PIGR,PRL,PTEN,SNAI1,SNCG,SPP1,STAT1,VCAM1,VEGFA                                                                                                                                                                                                                                                                                                                   |
| GATA4          |        | transcription regulator |           | -1,195 | -1,070 | 0,020    | 6,42E-06 | 1,37E-04                                                                                                                                                                                                                                                                                                                                                                                                                                                                                                                                                                                                                                  | ACACA,ATOH1,BECN1,CASQ2,CCN2,CDX2,CLDN1,COL1A1,COL1A2,COL3A1,CRABP2,CXCL6,ECM2,EPHX1,ESPL1,FABP1,FABP6,FGF16,FOS,FSTL4,HSD3B2,HSPA5,IFI16,INH1,IRF8,KCNA5,KLK14,LCT,LRRFIP1,LTBP2,MYL7,MYOG,NKX2-5,NPPA,OVOL1,POSTN,PPL,PTPRB,PYY,S100A4,SGPL1,SLC10A2,SPP1,SPRR3,TGFBI,THBS4,TIMP1,TNNC1,TNNT2,TPM1,VCAM1,VIM                                                                                                                                                                               |
| MAPT           | -0,688 | other                   |           | -0,875 | -0,836 | 0,013    | 6,45E-06 | 1,37E-04                                                                                                                                                                                                                                                                                                                                                                                                                                                                                                                                                                                                                                  | ABCG1,ABCG2,ACAT1,ACTG1,ACTN1,ACTR1A,ADD2,ALB,ALDOA,AMPH,ANXA5,APP,ARF1,ARF4,ATP1A3,ATP4A,BSN,C1R,C1S,C3,CALML3,CAMK2A,CAMK2G,CANX,CAP1,CAPN1,CAPN2,CASP3,CAST,CCNB1,CCT8,CDKN1B,CLTB,CTSD,CYFIP2,DBI,DNM1L,DPYSL2,DSTN,ENO1,ERMP1,FKBP1A,FOS,FUZ,GAD1,GSTM5,GSTP1,GUCY1B1,HK1,HSPA5,MAP1A,MAPK1,MAPK8,MAPT,NDUFS6,NFKB1,NME1,NMNAT2,NOS1,NOS2,PAK3,PCLO,PEA15,PKM,PPA1,PSEN1,PVALB,SH3GL2,SLC1A2,SQSTM1,STMN1,STUB1,SUCLG1,SYN1,TLN2,TOMM70,TOP2B,TUBA1A,TUBA1B,TUBB,TUBB6,UCHL1,VAMP2,YWHA |

|                                                                 |        |                                      |           |        |        |        |          |          |                                                                                                                                                                                                                                                                                                                                                                                                                                                                                                                                                                                                                                                                                                                                                                              |
|-----------------------------------------------------------------|--------|--------------------------------------|-----------|--------|--------|--------|----------|----------|------------------------------------------------------------------------------------------------------------------------------------------------------------------------------------------------------------------------------------------------------------------------------------------------------------------------------------------------------------------------------------------------------------------------------------------------------------------------------------------------------------------------------------------------------------------------------------------------------------------------------------------------------------------------------------------------------------------------------------------------------------------------------|
| STAT5B                                                          |        | transcription regulator              |           | -1,793 | -1,727 | 0,009  | 6,59E-06 | 1,39E-04 | A2M,AKR1C1/AKR1C2,ALDH3A2,BAIAP2,BAX,C8B,CA2,CA<br>SP3,CASP4,CASP6,CASP8,CD70,CISH,COX6A2,CSHL1,C<br>YP2A6 (includes<br>others),CYP2B6,CYP2C8,CYP3A5,CYP4A11,DDIT3,ESR1,F<br>AS,FOS,FOXP3,G0S2,GADD45A,GADD45B,GCK,GPD1,GP<br>X7,GSTP1,HEXA,HSD3B2,IGFALS,KRT19,LEP,LMAN1L,LT<br>A,LTB,MB,ME1,MOXD1,MYL7,NNMT,NPPA,PDK4,PIM1,PIP,<br>PLTP,PPP1R3C,PROM1,RO60,RPA1,SLC16A5,SLC34A2,S<br>LN,SOCS2,SOX15,STAT5A,TLR2,TNNC1,TNNI1,TRIM24,TU<br>LP2,WARS1,YBX2,ZFP36                                                                                                                                                                                                                                                                                                              |
| EIF2AK2                                                         | 0,159  | kinase                               | Activated | 2,348  | 2,727  | 0,072  | 6,65E-06 | 1,40E-04 | ATF3,BAX,BHLHE40,BIRC2,DDIT3,DDX58,EGR1,FAS,FOS,I<br>FI35,IFIT5,IFITM1,IFITM2,ISG15,LGALS3BP,NFKBIA,NMI,N<br>NMT,NOS2,OAS1,PARP12,PLSCR1,PPP1R15A,PSMB10,S<br>OD2,STAT1,TP53,TUBA1A,UBE2L6,ZC3HAV1,ZNF292                                                                                                                                                                                                                                                                                                                                                                                                                                                                                                                                                                    |
| miR-29b-3p<br>(and other<br>miRNAs<br>w/seed<br>AGCACCA)<br>Ap1 |        | mature microRNA                      | Inhibited | -3,031 | -3,412 | -0,080 | 6,72E-06 | 1,41E-04 | CAV2,CNOT8,COL15A1,COL1A1,COL1A2,COL3A1,COL4A1<br>,COL4A2,COL5A2,COL5A3,DCP2,DUSP2,FBN1,FRAT2,GM<br>FB,HMG3,LAMC1,MYBL2,PPIC,PPM1D,PTEN,SRSF10,TP<br>53,VEGFA                                                                                                                                                                                                                                                                                                                                                                                                                                                                                                                                                                                                                |
|                                                                 |        | complex                              |           | -1,472 | -1,139 | 0,073  | 7,20E-06 | 1,51E-04 | ATF3,CALM1 (includes<br>others),CCN2,CCNA2,CD44,CDX2,CLU,DDIT3,DLX5,DNMT1<br>,F2RL1,F3,FN1,FOS,FOSL1,GSTP1,HBB,HMOX1,HPGD,HS<br>P90B1,IFRD1,IL13,KCNN4,KLK3,LPL,MET,MMP1,MMP7,MY<br>OD1,NDRG1,NGF,NOS2,NOTCH4,PADI3,PCK1,PRL,RNF7,<br>S100A4,SNCG,TIMP1,UFD1,VCAM1,VDR,VEGFA                                                                                                                                                                                                                                                                                                                                                                                                                                                                                                 |
| ERG                                                             |        | transcription regulator              |           | 1,028  | 1,402  | 0,064  | 7,27E-06 | 1,52E-04 | ABCC4,ACTN1,ADGRG1,ALOX12,APOC1,ARHGAP28,CCN<br>A2,CD59,CHRN2,CHRN4,CHTOP,COL11A2,CYFIP1,DB<br>N1,DSTN,EXT1,FHL1,FOSB,GDF2,GMFB,GUCY1A1,GUCY<br>1B1,HDAC6,HPGD,ITGA6,KLK3,MET,MMP1,NDRG1,NFIL3,<br>NLGN1,NRCAM,PARVA,PECAM1,PIM1,PLA1A,PSTPIP2,RH<br>OA,RHOB1,RPA1,RRAS,RSU1,SLIT2,SNAI1,SOX4,SPP1<br>,TACC1,TMPRSS2,TRIOBP,TSC22D3,VIM,WNT11,WNT2                                                                                                                                                                                                                                                                                                                                                                                                                           |
| mir-30                                                          |        | other                                |           | -0,897 | -1,185 | -0,072 | 7,76E-06 | 1,61E-04 | BAX,BECN1,CCN2,GADD45A,ITGB3,KLF9,MYBL2,NEDD4L,<br>NPPA,RAB38,SMAD1,SMAD2,SNAI1,STK39,TP53,UBE2I,U<br>GT8,VIM                                                                                                                                                                                                                                                                                                                                                                                                                                                                                                                                                                                                                                                                |
| RXRB                                                            |        | ligand-dependent<br>nuclear receptor |           | 1,561  | 1,522  | -0,013 | 8,23E-06 | 1,70E-04 | ABCA1,ALDH1A1,ATP1A3,C1QA,CCL17,CCL20,CCL22,CR<br>YAB,CSHL1,CTSS,CYP24A1,DRD2,FABP1,FLRT3,FSTL1,G<br>AS6,HBEGF,IL13,LCN2,LYZ,S100A4,SEMA4D,SPP1,TERT,<br>VCAN                                                                                                                                                                                                                                                                                                                                                                                                                                                                                                                                                                                                                |
| TERT                                                            | -0,231 | enzyme                               |           | -0,398 | -0,346 | 0,016  | 8,23E-06 | 1,70E-04 | ALDH1A3,ASNS,ATF3,B2M,BAX,CALU,CCN2,CD24,COL5A<br>2,ELK3,FUT4,GATA6,GLB1,HLA-<br>B,HOXB6,HTRA1,IFI16,IFIT2,IGFBP4,IL13RA1,ISG15,ITGAV<br>,KDM5C,KLK3,KRT19,MMP1,MX1,NFKBIA,PCDHGA1,PLD<br>2,PLTP,PROM1,RB1,RRM2,SOD2,SPP1,TERT,TP53,VIM                                                                                                                                                                                                                                                                                                                                                                                                                                                                                                                                      |
| CST5                                                            |        | other                                | Inhibited | -3,417 | -3,731 | -0,039 | 8,30E-06 | 1,71E-04 | ABCC1,ABLIM1,ACYP2,ADSL,AGO1,AKAP12,AKR1C1/AKR<br>1C2,ANXA2,ANXA3,ANXA5,ARHGAP12,ARHGAP29,ATR,B<br>CAP31,BLOC1S1,CAMK2G,CD44,CNOT8,DHX9,DR1,EBNA<br>1BP2,EIF2B1,EIF5B,ELK3,EMP3,ESRRA,FHL1,FRAS1,GAR<br>1,GNL3,KDM5B,LAMC1,LIMD2,MALT1,MAPK13,MSN,MVP,<br>NCBP2,NOC3L,NOP10,NR2F1,NRP1,NUP107,NUP155,PCL<br>AF,PLS3,PPIC,PPL,PRKACB,PUF60,RBM28,RBP1,REEP5,<br>RTN3,S100A11,SGPL1,SMAD2,SNF8,SOX4,STEAP1,SUPV<br>3L1,TAF1,TESC,VCAN,VIM,WDR3                                                                                                                                                                                                                                                                                                                                 |
| ALDH1A2                                                         | 0,060  | enzyme                               |           | -0,181 | -0,276 | -0,025 | 8,36E-06 | 1,71E-04 | ABCG2,ALDH1A1,ALDH1A3,ATF3,CCN2,CD44,COL1A2,CO<br>L3A1,HOXC8,IGFBP4,NKX2-5,NPPA,SPP1,TGFB1,TIMP1                                                                                                                                                                                                                                                                                                                                                                                                                                                                                                                                                                                                                                                                             |
| ADRB                                                            |        | group                                | Inhibited | -2,156 | -2,320 | -0,026 | 8,39E-06 | 1,71E-04 | AACS,ABL1,ANXA5,ATF3,BAX,BHLHE40,BNIP3L,CASP3,C<br>ASP4,CASP6,CAVIN2,CCNA2,CDC7,CDK4,CDKN1B,CRYA<br>B,DDIT3,E2F4,ENDOD1,FAS,FOS,GADD45A,GSTA3,HMOX<br>1,IFIT3,JUNB,NBN,NFKBIA,NOD1,NOS2,NOTCH2,NPPA,N<br>R4A1,NR4A3,PCNA,PPM1D,RAN,SQSTM1,WEE1,WNT7B<br>AATK,ACAA1,ADGRG1,ADO,ALDH3A2,ALOX5,ANKRD49,A<br>NXA1,APLP1,APOD,ARAP2,ASPA,CAMK2N1,CAP1,CARHS<br>P1,CCN2,CCN5,CD24,CDKN1B,CLDN11,CPD,CTNNA1,CY<br>P2C8,CYP3A7,DHCR24,ELOVL1,EPCAM,ERF,EVI2A,EVI2B<br>,FBP1,FKBP1A,G6PC,GAST,GJC2,GLUL,HAPLN2,INS,IPO1<br>3,KLHL2,LAMP1,MAP4K4,MCAM,ME1,MMP1,MMP7,MTMR2<br>,MTMR6,MYO6,NFASC,NKAIN1,PAPSS1,PCK1,PICALM,PL<br>EKHA1,PPP1R16B,PROP1,PRRG1,RCBTB1,RHOA,ROCK1<br>,SEMA4D,SIRT2,SLC12A2,SLC1A2,SNAP23,SORBS3,SOX1<br>0,SPP1,STK39,TMEM123,TNS1,UGT8,UTP14C,VEGFA,YA<br>P1 |
| TCF7L2                                                          |        | transcription regulator              | Activated | 1,535  | 2,114  | 0,070  | 8,54E-06 | 1,74E-04 | ALAS1,APOC3,CCR4,CLU,CSTA,CTLA4,CYBB,F3,FOSL1,H<br>MOX1,HPGD,IVL,JUND,MMP1,NCF2,NOS2,NR4A1,PRL,SO<br>X4,SPP1,SST,TBX21,TIMP1,VEGFA                                                                                                                                                                                                                                                                                                                                                                                                                                                                                                                                                                                                                                           |
| JUND                                                            | -0,375 | transcription regulator              |           | -0,246 | -0,109 | 0,039  | 9,01E-06 | 1,83E-04 | ALAS1,APOC3,CCR4,CLU,CSTA,CTLA4,CYBB,F3,FOSL1,H<br>MOX1,HPGD,IVL,JUND,MMP1,NCF2,NOS2,NR4A1,PRL,SO<br>X4,SPP1,SST,TBX21,TIMP1,VEGFA                                                                                                                                                                                                                                                                                                                                                                                                                                                                                                                                                                                                                                           |

|         |        |                                      |           |        |        |        |          |          |                                                                                                                                                                                                                                                                                                                                                                                                                                                                                                                                                                             |
|---------|--------|--------------------------------------|-----------|--------|--------|--------|----------|----------|-----------------------------------------------------------------------------------------------------------------------------------------------------------------------------------------------------------------------------------------------------------------------------------------------------------------------------------------------------------------------------------------------------------------------------------------------------------------------------------------------------------------------------------------------------------------------------|
| GNAQ    |        | enzyme                               |           | -1,522 | -1,344 | 0,064  | 9,16E-06 | 1,86E-04 | ADAMTS1,ADM,ANXA3,ATF3,BNIP3L,BTG2,CCN2,CD44,CI<br>TED2,CTSV,DPYS,EGR1,F2RL1,FOS,GADD45A,GAS6,GBP<br>2,HSPB8,LHB,NEU1,NFIL3,NOX5,NPPA,NR4A1,NR4A3,OA<br>S1,PDE10A,PLSCR1,PRKCD,RHOB,SELENBP1,SGK1,SH3<br>BP5,STAT1,VEGFA,YAP1                                                                                                                                                                                                                                                                                                                                               |
| SPARC   | 0,382  | other                                | Inhibited | -2,539 | -2,609 | -0,012 | 9,72E-06 | 1,96E-04 | ABCC4,BHLHE40,CDH3,CFD,CIDEC,CLDN1,COL1A1,COL1<br>A2,CTSF,FN1,GPD1,HAT1,HSF4,MBD4,MPZL1,MSH2,NDR<br>G1,NES,NIPSNAP2,NOTCH2,PER2,PIK3C2G,POLE2,PPIH,<br>RFC4,RIC8A,RRM1,SLC34A2,SNAI1,TRIM5,TSKU,USP2,VI<br>M                                                                                                                                                                                                                                                                                                                                                                |
| TAZ     |        | enzyme                               |           | 1,009  | 0,980  | -0,008 | 1,05E-05 | 2,11E-04 | ADAMTS1,ALDOC,AMPH,ANXA1,ARHGAP29,CAMK2N1,CA<br>V2,CCN2,CD44,COL1A1,COL5A2,DUSP1,ESM1,F2RL1,FN1<br>,HIF1A,HMOX1,IFI16,LDLR,LUM,MET,MYOF,NOS2,PCLO,P<br>KM,PLK2,SORBS2,TFPI2,VEGFA,VLDLR,WNT11                                                                                                                                                                                                                                                                                                                                                                               |
| RORA    | -0,330 | ligand-dependent<br>nuclear receptor | Inhibited | -2,899 | -2,730 | 0,046  | 1,07E-05 | 2,13E-04 | ABCA1,ACACB,ADIPOR1,APOC3,AQP8,ASNS,BHMT,CAV3<br>,CCNB1,CISH,CLCA1,CYP2A6 (includes<br>others),CYP2B6,CYP2C8,CYP3A5,CYP4A11,CYP7B1,DHCR<br>24,ELOVL6,G6PC,GADD45B,GSTP1,HPGD,IL18,KCNK5,LC<br>N2,MC1R,MGST3,MUC5B,MYOG,NFKBIA,NLGN1,NNMT,N<br>OCT,PCK1,PPP1R3C,RBFOX1,RDH16,RHBG,RORA,RORC<br>,SELENBP1,SLC13A2,SLC16A7,SLC1A2,SLC25A24,SLC2A<br>4,TLR3,UCP2,VLDLR                                                                                                                                                                                                          |
| EBI3    | -0,049 | cytokine                             | Activated | 1,950  | 2,142  | 0,043  | 1,10E-05 | 2,18E-04 | B2M,CDK4,FOS,GADD45G,GBP2,HLA-A,HLA-B,HLA-C,HLA-<br>DMA,HLA-DMB,HLA-DPA1,HLA-<br>DRA,IL13,MX1,PDCD1,PIM1,RORC,STAT1,TAP1,TBX21,TN<br>FSF10                                                                                                                                                                                                                                                                                                                                                                                                                                  |
| GDF2    | -0,224 | growth factor                        |           | -0,026 | 0,350  | 0,072  | 1,11E-05 | 2,19E-04 | ABCG2,ANKH,ANXA3,BID,CDH6,COL1A1,CRABP1,CRYAB,<br>DLX5,ELOVL1,FOS,FOXC2,GADD45B,HIF1A,HSPB8,HTRA<br>1,NFKBIA,NGF,NRCAM,NRP1,NTF3,POSTN,SEMA3B,SER<br>PINE2,SMAD1,SOCS2,SPP1,VCAM1,YWHAH                                                                                                                                                                                                                                                                                                                                                                                     |
| RAC1    | 0,223  | enzyme                               |           | 0,113  | 0,366  | 0,054  | 1,20E-05 | 2,35E-04 | APBB1,ATF3,BID,CCN2,COL1A2,DPYSL2,DUSP1,ESR1,FA<br>S,FN1,FOS,FOSL1,HIF1A,HMOX1,HSD11B2,IL13,IL6R,ITGA<br>6,KIR3DL2,MAPK8,MMP1,MYOG,NPPA,PRL,RAC1,RHOA,S<br>HC1,SLC5A5,SOD2,STAT1,STAT3,VCAM1,VEGFA                                                                                                                                                                                                                                                                                                                                                                          |
| TNFSF11 |        | cytokine                             |           | -1,390 | -0,918 | 0,063  | 1,25E-05 | 2,43E-04 | AHR,AKAP13,AURKA,BST1,CA2,CAPN2,CCR4,CD1A,CD44<br>,CD83,CDK14,CDKN1B,CSF3,DCSTAMP,DUSP1,ECT2,ES<br>R1,F3,FAS,FHL2,FOS,FOSL1,FOXO1,GADD45B,GCH1,GLR<br>X,GRB10,GRN,GTF2H1,HCLS1,HMOX1,IFRD1,IL13,IL13RA<br>1,IL15,IRF8,ITGAV,ITGB3,ITPKB,JUNB,LSR,MARCKSL1,M<br>MP1,NAB2,NFIL3,NFKB1,NFKBIA,NOS2,PIM1,RCL1,RGS16<br>,RHOB,RRAS,SEN2,SLC7A7,SOD2,SPP1,STAT1,STMN1,<br>TLR2,TNFRSF11B,TPAN13,VCAM1                                                                                                                                                                             |
| STAT6   |        | transcription regulator              |           | -0,677 | -0,570 | 0,013  | 1,26E-05 | 2,45E-04 | ABLIM1,ADAM11,ALDH2,ANKRD55,ANXA1,APOLD1,ASS1,<br>BAX,CASP6,CCL17,CCL20,CCL22,CDKN1B,CEL,CIDEC,CI<br>SH,CLPS,CNR2,COL1A1,COL1A2,CTSS,CYBB,CYP4A11,D<br>CSTAMP,EFL1,EGR1,EPHX1,EXT1,FABP1,FCER1G,FOXP3<br>,GADD45B,GADD45G,GATM,GBP2,HLA-DMA,HLA-<br>DMB,IER2,IFI16,IFI44,IFIH1,IFIT3,IFNAR2,IL10RA,IL13,IL15,I<br>RF7,IRF9,ISG15,LGALS3BP,LTA,LTB,LY75,MYO6,NFIL3,NF<br>KBIA,PDK4,PLBD1,PLSCR1,PNPLA2,POLE2,PPARA,PRKC<br>A,PROS1,RAD50,S100A10,SAMSN1,SELENBP1,SOCS2,S<br>OX13,SPDEF,SQSTM1,STAT5A,STK39,SYNGR2,TBX21,TE<br>S,TIMP1,TLE1,TMEM131,USP2,VCAM1,VIM,ZBP1,ZFP36 |
| NFYA    |        | transcription regulator              |           | -1,106 | -0,887 | 0,060  | 1,27E-05 | 2,46E-04 | ALB,CAT,CCNA2,CCNB1,CCNB2,CDC25B,CDK1,COL1A2,<br>COL5A3,EGR1,EPHX1,F12,G6PC,GADD45A,GADD45B,GU<br>CY1B1,HLA-DQB1,HLA-<br>DRA,HSPA5,JUNB,JUND,PCK1,PKM,PPP1R15A,PTTG1,R<br>HOB,RRM2,UBE2I                                                                                                                                                                                                                                                                                                                                                                                    |
| BMI1    |        | transcription regulator              |           | 0,647  | 0,579  | -0,025 | 1,31E-05 | 2,54E-04 | ATOH1,AURKA,BTG2,CASP8,CD63,CDKN1B,CUL1,CYFIP2<br>,DNMT1,FAS,IL36A,MCM3,MET,NFKB1,P4HA1,RRM1,SFN,<br>TERT,TP53,TP53I3,TUSC3,VIM,WNT10B                                                                                                                                                                                                                                                                                                                                                                                                                                      |
| RAB1B   | -0,052 | other                                |           | 1,098  | 1,273  | 0,046  | 1,33E-05 | 2,57E-04 | ARF4,BET1,COP22,DERL1,GOLGA3,GORASP2,KDELR3,R<br>AB32,RRAGC,SEC24D,SLC5A5,SRP54,STX3,USO1,YIF1A                                                                                                                                                                                                                                                                                                                                                                                                                                                                             |
| NFATC2  |        | transcription regulator              |           | 0,771  | 0,994  | 0,034  | 1,40E-05 | 2,70E-04 | ABCA1,AQP5,CASP3,CASP4,CCL17,CCL22,CCNA2,CCNB<br>1,CD83,CDK4,CISH,CITED2,CRYAB,CTLA4,CX3CR1,EGR3,<br>FAS,FGL2,FOXP3,HDAC1,IFIT2,IFIT3,IL13,IL15,IL18,IRF7,IS<br>G15,MITF,NAA80,NFKB1,NFKBIA,NMI,NR4A1,PDCD1,PDC<br>D5,PDZD2,PLK2,PMEL,PPARG,PTPRK,RGS2,RORC,SH3B<br>P5,SOCS2,STAT1,STAT5A,TBX21,TERT,TLR2,TLR3,ZBTB<br>32                                                                                                                                                                                                                                                   |
| ATF2    |        | transcription regulator              |           | -1,954 | -1,600 | 0,077  | 1,40E-05 | 2,70E-04 | ANGPTL2,APOC3,ASNS,ATF3,BCKDHA,CCNA2,CGA,CYP<br>11B2,DDIT3,DMBT1,DUSP1,EGR1,FN1,FOS,GADD45A,IL13<br>,ITGB8,MMP1,NOS2,NPPA,PCK1,PPARG,PSEN1,PTEN,RH<br>OB,SOD2,SST,VCAM1,ZNF268                                                                                                                                                                                                                                                                                                                                                                                              |

|                   |        |                            |           |        |        |        |          |          |                                                                                                                                                                                                                                                                                                                                                                                                                                                                                 |
|-------------------|--------|----------------------------|-----------|--------|--------|--------|----------|----------|---------------------------------------------------------------------------------------------------------------------------------------------------------------------------------------------------------------------------------------------------------------------------------------------------------------------------------------------------------------------------------------------------------------------------------------------------------------------------------|
| SIM1              | 0,094  | transcription regulator    |           | -2,131 | -1,580 | 0,076  | 1,51E-05 | 2,89E-04 | ABCG1,ABI1,AKR1B1,AVP,BST1,CBFB,CDH3,CLCN1,COP2,CRISP2,CYBA,EGF,EGR1,ELL2,FKBP3,FOXH1,GLI1,GLUL,GSTA3,HGFAC,HLA-A,IFI16,IGFBP4,IL6R,ITGB3,KCNE5,KLK3,LEP,LRRFIP1,LT F,MYCL,NAP1L4,PADI3,PEA15,PFN1,PMFBP1,POSTN,RG S10,SELENBP1,SLC12A3,SNN,SNX5,SOX10,SST,TACR2,TCF7L1,THRB,TSC22D3,TSSK2,TYK2,TYROBP,USP2,WNT7B                                                                                                                                                               |
| ELK1              | -0,204 | transcription regulator    | Inhibited | -2,269 | -2,022 | 0,062  | 1,52E-05 | 2,90E-04 | ANKH,AVP,CCT8,CDKN1B,EGR1,ELK1,FOS,FOSB,FOSL1,FUT4,ITGAV,ITGB6,JUNB,MTHFD2,PRKCA,PRL,SNAI1,SP P1,TIPARP,TPD52L1,ZFP36                                                                                                                                                                                                                                                                                                                                                           |
| Ige               |        | complex                    | Activated | 1,746  | 2,239  | 0,060  | 1,59E-05 | 3,03E-04 | ACTN1,ALAS1,ALOX5,ANXA1,BAIAP2,C3,CAMK2G,CAPN2,CARHSP1,CCL1,CCL17,CCL22,CD53,CD74,CHST8,CISH,C OL18A1,CSF3,CXADR,DUSP2,EGR1,EIF4G2,FAS,FCER1G, FHL2,GADD45B,HBEGF,HIP1R,HLA-DMA,HMOX1,IL13,IL15,ITGAV,JUNB,KRAS,LTA,MALT1,MA RCKSL1,MMD,NFKB1,NFKBIA,NFKBIE,NPHS2,NRP1,NXPE 4,PEA15,PECAM1,PFN1,PIK3IP1,PLK3,PPARG,PPIF,PRKC A,PTPRF,RAI14,RGS16,RNASE3,SEMA7A,SERPINB1,SNR PD1,SPP1,STAT5A,TCIRG1,TLR2,TNC,TNFRSF11B,TNFR SF13B,TNFSF10,TPPP3,TUBB6,UGCG,VCAM1,VDR,VIM,W NT10R |
| estrogen receptor |        | group                      |           | -1,462 | -1,473 | -0,002 | 1,60E-05 | 3,04E-04 | ABCA1,ABCG1,ABCG2,ADIPOQ,AGO1,ANXA1,BAX,BMP7, C3,CAPG,CAV2,CCN2,CD24,CD44,CD5,CD59,CD99,CDH1 5,CDH3,CLDN3,COL4A1,COL4A2,CYP2B6,DNMT1,EGR1,F 11R,F12,FGF1,FGF5,FN1,FOS,GP9,HBEGF,HRAS,KRT19,L DLR,LTF,LYN,MAPT,MMP1,MMP17,MSN,MUC1,PCDH1,PD YN,RGS2,SMAD1,SNAI1,SYNPO,TERT,TGFBR3,TIMP1,TN C,TP53,TSC22D3,UGT8,VEGFA,VIM                                                                                                                                                         |
| RETNLB            |        | other                      |           | 1,236  | 1,610  | 0,074  | 1,64E-05 | 3,10E-04 | CASP3,CCN2,COL1A1,COL1A2,ELN,FABP1,FN1,FZD1,FZD 6,IL13,IL13RA1,JAK1,KLF15,MID1,MSN,NR4A1,PLA1A,PTE N,SMAD1,SOCS2,TERT,THBS4,TIMP1,TLR2,TNNC1,UBE2 C                                                                                                                                                                                                                                                                                                                             |
| SGPL1             | 0,216  | enzyme                     |           | 0,649  | 0,637  | -0,003 | 1,73E-05 | 3,24E-04 | ABCA1,ABCC1,APP,BAX,DDIT3,DDX58,HSPA5,ISG15,MX1, OAS1,PPARG,SEC61A1                                                                                                                                                                                                                                                                                                                                                                                                             |
| CETP              | -0,100 | enzyme                     |           | 1,282  | 1,257  | -0,007 | 1,73E-05 | 3,24E-04 | APOA1,APOB,DDIT3,HSPA5,LDLR,LPL,NR0B2,P4HB,PDIA 3,PDIA4,PLIN3,PPARG                                                                                                                                                                                                                                                                                                                                                                                                             |
| EFNA1             | -0,242 | other                      |           | -0,436 | -0,512 | -0,017 | 1,75E-05 | 3,27E-04 | APOBEC3G,CCN2,CRABP2,FN1,FOSL1,GATA6,HERC6,HR AS,IRF7,ITGB6,IVL,KLK7,KRAS,KRT10,KRT4,KRT75,NEDD 4L,NRAS,PKP1,TGM1,TRIM5,UBE2C,WWP1                                                                                                                                                                                                                                                                                                                                              |
| IL12 (complex)    |        | complex                    | Activated | 1,928  | 2,252  | 0,052  | 1,81E-05 | 3,38E-04 | AHR,CASP1,CASP3,CCL1,CCL17,CCL20,CCL22,CCR4,CD 44,CD63,CISH,CXCL6,DDB2,FAAH,FAS,FOS,FOXP3,FURIN ,FUT7,GADD45B,GADD45G,GZMA,IFIH1,IFIT2,IFNGR1,IFN GR2,IL13,IL15,IL18,IL32,IRF8,ISG15,ITGA6,ITGAE,ITGB2,LT A,LTB,NOS2,PDCD1,PDCD4,PIM1,RAD23B,RPA1,RPA2,RP A3,SET,SMAD2,SOCS2,TBX21,TIMP1,TLR2,VEGFA                                                                                                                                                                             |
| TGFB2             |        | growth factor              |           | 0,449  | 0,615  | 0,031  | 1,82E-05 | 3,40E-04 | ABCA1,AHR,BHLHE40,CCN2,CD59,COL1A1,COL1A2,COL3 A1,COL4A1,CYP24A1,EGR1,FAS,FN1,FOS,FURIN,HBEGF, HMOX1,MLLT3,NGF,NOS2,PKD4,PECAM1,PLOD2,PTEN,S MAD2,SPP1,TGFBR3,TIMP1,TNFRSF11B,VCAN,VDR,VEG FA,WNT11                                                                                                                                                                                                                                                                             |
| KLF2              | -0,097 | transcription regulator    |           | 0,635  | 0,561  | -0,014 | 1,83E-05 | 3,41E-04 | ACKR3,ADAM15,ADM,APLN,AQP5,ASS1,CCN2,CCR4,CD 1A,CD44,COL4A1,CX3CR1,ELN,F2RL1,F3,FGF5,FOXP3,FU T4,GADD45A,HBB,HIF1A,IL6R,ITGB2,ITGB3,JUNB,KCNN4, KITLG,LEPR,MVP,MYH10,NDRG1,NFKBIA,NOTCH2,PECA M1,PLOD2,PPARG,PROS1,PTGDS,STAT1,STAT3,TBX21,T ERT,TFPI,TFPI2,TIMP1,VCAM1,WEE1                                                                                                                                                                                                    |
| NTRK2             | 0,062  | kinase                     |           | 1,652  | 1,931  | 0,067  | 1,85E-05 | 3,43E-04 | ABCG2,AMBN,APP,BID,CASP1,CCNA2,CDK1,CDK4,EGR1, FOS,GAD1,MCM5,NOS2,PCNA,PTEN,PVALB,PYCARD,RA B3A,RB1,SPP1,SYN1,TNFSF10,TP53BP2,VEGFA,VIM                                                                                                                                                                                                                                                                                                                                         |
| MEF2D             |        | transcription regulator    |           | -1,717 | -1,547 | 0,040  | 1,91E-05 | 3,53E-04 | CCN2,COL1A2,COL3A1,FN1,FOS,FOSB,JUNB,JUND,MCM 3,MCM5,MYOD1,MYOG,NPPA,NR4A1,PCNA,PPARA,PTEN, SLC2A4,TNNC1,TNNI1,VIM,ZFP36                                                                                                                                                                                                                                                                                                                                                        |
| PRKCA             | -0,182 | kinase                     |           | -1,182 | -0,973 | 0,040  | 1,95E-05 | 3,60E-04 | APOBEC3G,APOM,APP,ARHGDI,ARL4C,ARPC2,AVP,BNI P3L,CCN2,CHRD,COL1A1,CSF3,CSTA,CYBB,EGR1,FN1, FOS,IFIT3,IVL,LPL,MMP1,NFKB1,NFKBIA,NOS2,NOTCH4,N PPA,PLA2G6,PRKCD,PTEN,RB1,SDCBP,TP53,USP8,VCA M1,VEGFA                                                                                                                                                                                                                                                                             |
| ADRB1             | -0,117 | G-protein coupled receptor |           | 0,296  | 0,314  | 0,007  | 2,03E-05 | 3,73E-04 | ANXA4,APP,BECN1,COL3A1,DDIT3,GNAS,HSPA5,IRAK1,L EP,NGF,SMC4                                                                                                                                                                                                                                                                                                                                                                                                                     |
| F2R               | 0,109  | G-protein coupled receptor |           | 0,093  | 0,367  | 0,052  | 2,03E-05 | 3,73E-04 | BIRC2,CASP3,CASP4,CCN2,CD24,CD44,CLDN3,DUSP1,E GR1,EGR3,ESR1,F11,F3,FBP1,FN1,FOS,HMOX1,ITGA6,KR T19,LAMB1,MCAM,MYOG,NR4A1,RHOA,S100A4,TFPI,TFPI 2,TP53,VCAM1,VEGFA,VIM                                                                                                                                                                                                                                                                                                          |

|                  |        |                                   |           |        |        |        |          |          |                                                                                                                                                                                                                                                                                                                                                                                                                                                                                            |
|------------------|--------|-----------------------------------|-----------|--------|--------|--------|----------|----------|--------------------------------------------------------------------------------------------------------------------------------------------------------------------------------------------------------------------------------------------------------------------------------------------------------------------------------------------------------------------------------------------------------------------------------------------------------------------------------------------|
| PRKAA1           | 0,079  | kinase                            |           | -0,278 | -0,464 | -0,031 | 2,05E-05 | 3,75E-04 | ACKR3,ALB,ARHGDI,ATF3,BAX,CA2,CAT,CD24,CDH3,CDKN1B,CLU,CYP2B6,CYP3A5,DDIT3,DLGAP2,EAF2,EGF,FN1,G6PC,GHR,GRIA3,GSTA1,HSD3B2,HSPA5,IGFBP4,NCF2,NFKBIA,OAT,PDYN,PKLR,PRKACB,PSMB8,RGS2,SERPIN1,SIRT2,SIRT3,SOD2,TP53,VCAM1,YAP1                                                                                                                                                                                                                                                               |
| MAP2K1/2         |        | group                             |           | -1,217 | -1,004 | 0,046  | 2,11E-05 | 3,83E-04 | ARC,ATF3,C3,CCN2,CDK1,CDKN1B,CHI3L1,DDIT3,DUSP1,EGR1,ELN,FOS,FOSL1,FOXP3,FURIN,HMOX1,HSPA5,IL13,JAK1,NFKB1,NOS2,PCNA,PPARA,RRM1,VEGFA,VIM                                                                                                                                                                                                                                                                                                                                                  |
| ID3              | 0,266  | transcription regulator           |           | -0,045 | -0,075 | -0,005 | 2,25E-05 | 4,06E-04 | ADGRG1,ADIPOQ,ADM,BMP7,BTG2,CCNB1,CD44,CD83,CD25B,CDK1,CDKN1B,DTX2,DUSP1,DUSP2,ELOVL6,FCER1G,FOXO1,FOXP3,GADD45B,GADD45G,GNL3,HIF1A,IFI16,IFNGR1,IFNGR2,IGFBP4,IL10RA,IL17RB,IL6R,IRF8,ITGB3,LEPR,LGALS1,LTA,LTB,NEUROD6,NPPA,NR4A1,NR4A3,PDCD1,PIK3IP1,PTPN3,RORA,SEMA7A,SOX13,SOX4,TGFB3,TNFSF10,TP53,VCAM1                                                                                                                                                                              |
| LEPR             | 0,236  | transmembrane receptor            |           | 0,024  | 0,117  | 0,017  | 2,25E-05 | 4,06E-04 | ABCG1,ACACA,ADIPOQ,ANXA5,APOA1,APOB,CASP8,CD5,CD63,CDK8,CNR2,COL1A1,COL4A1,EIF3A,FN1,FOS,GADD45B,GADD45G,GCK,GTFA2,HIF1A,HPX,LCN2,LDLR,LEPR,LIPC,LPL,MAP4K4,MMP7,NBN,NOS2,PPARA,PPARG,PSMB8,RNASET2,SLC2A4,SMARCD3,SOC2,STAT3,STUB1,TIMP1,TRPV1,TSC22D3,UCP2                                                                                                                                                                                                                               |
| mir-155          |        | microRNA                          | Inhibited | -3,727 | -3,959 | -0,042 | 2,31E-05 | 4,14E-04 | ADAM10,ANXA2,CD47,CDC73,CLDN1,CSF3,DHX40,FADD,HIF1A,HMOX1,IL13,IL13RA1,IL7,IRF7,IRF8,IRF9,MME,MSH2,MSH6,MX1,NOS2,NUP153,PDCD4,PPARG,PSIP1,PTEN,RORA,SDCBP,SMAD2,STAT1,STAT3,TP53,TRIM32,WEE1                                                                                                                                                                                                                                                                                               |
| CLDN7            | 0,258  | other                             |           | -1,205 | -1,197 | 0,001  | 2,36E-05 | 4,20E-04 | ABLIM1,ALDH3A1,ANXA3,ARHGDI,C1S,C3,CCL20,CCN2,CKAP4,CYP11B2,DENND5A,DNAJB6,F3,FADS3,FOSL1,GRINA,HLA-B,IFI44,MAGED1,MLEC,MRPS17,MT1X,MUC1,MX1,NETO2,NNMT,PLGRKT,PSG11,PSMG2,RNASET2,RPP40,SERPINB1,SPRR3,TPK1,UBE2L6                                                                                                                                                                                                                                                                        |
| Pdgf (complex)   |        | complex                           |           | -0,310 | -0,072 | 0,045  | 2,38E-05 | 4,22E-04 | BAX,CD44,CDKN1B,COL4A1,CYBA,DIO3,EGR1,F3,FN1,FOS,FOSB,FOXO1,HIF1A,HMOX1,IL13,ITGB3,JUNB,LDLR,MMPI1,NTF3,ODC1,PCNA,PIK3R3,PPARG,SV2A,TERT,TIMP1,TP53,VCAM1,VEGFA                                                                                                                                                                                                                                                                                                                            |
| prostaglandin E2 |        | chemical - endogenous mammalian   |           | -2,182 | -1,971 | 0,029  | 2,56E-05 | 4,53E-04 | ABCG1,ADAMTS1,AHR,ANXA2,APP,ARC,ATF3,BAX,CASP1,CASP3,CASP4,CASP6,CASP7,CCL20,CCL22,CCN2,CCNB1,CCR4,CD44,CD83,CNNM2,COL1A1,CSF3,CTLA4,DUSP1,DYNLL1,EGR1,ESRRA,F2RL1,FAS,FN1,FOS,FOSB,FOSL1,FOXO1,FOXP3,HIF1A,HMOX1,HSD3B2,IGFBP4,LEFTY2,MITF,MMP1,MX1,MYOZ1,NFIL3,NFKBIA,NOS2,NR4A1,NRP1,PKLR,PLK2,PPARG,PRL,PTK2,RAB5A,RGS2,RIN1,RORC,SOC2,SPP1,ST3GAL4,TBX21,TGFB3,TNFRSF11B,TP53,TSC22D3,UCP2,VEGFA,VIM,XRCC5                                                                            |
| INSR             | -0,328 | kinase                            | Inhibited | -3,070 | -2,786 | 0,063  | 2,62E-05 | 4,63E-04 | ACOT13,ALAD,ALB,ALDH2,ALDH6A1,ATF3,BAG1,C1QA,C2,CASP6,CCN2,CD83,CDK1,COL6A3,COX6A2,CRAT,CSTB,CTSV,DCTN4,DEK,DIO3,DUSP1,EGR1,FBP1,FHL1,FOS,FOX2,FURIN,GADD45A,GATA6,GCH1,GCK,GNB1,GRB10,GRN,HBEGF,HOXC8,HSD17B4,IDI1,IER2,IFITM2,IFNAR2,IL25,INS,INSR,IQGAP1,JUNB,KLF9,LEP,LEPR,LGALS1,LRP10,LYZ,MARCKSL1,MCM2,MCM5,MSH6,MX1,MYBL2,MYOM2,NAMPT,NDRG1,NFE2L2,NGF,NPPA,PDCD4,PDHA1,PKK4,PIM1,PKLR,PMS1,PPARA,PRKD1,RGS16,RHOB,RRM1,RRM2,SIRT2,SKAP2,SLC2A4,SOC2,THBS2,TNNI1,UCP2,VCAM1,7FAND5 |
| NR1H3            | -0,229 | ligand-dependent nuclear receptor |           | -0,573 | -0,242 | 0,067  | 2,63E-05 | 4,64E-04 | ABCC3,ABCC4,AHR,ALAS1,ALDH1A1,APOA1,CSHL1,CYP2A6 (includes others),CYP2B6,CYP2C8,CYP3A4,CYP3A5,CYP3A7,CYP7B1,DIO1,EI24,EPHX1,FBRS,G6PC,GADD45B,GSTM5,GSTP1,HK1,HNF4A,HSD17B4,MAFF,PCK1,PGD,RARRES1,RPA2,SULT2B1,TMPRSS2                                                                                                                                                                                                                                                                    |
| EGR2             | -0,609 | transcription regulator           |           | -1,638 | -1,245 | 0,063  | 2,80E-05 | 4,93E-04 | ABCC1,ASS1,BHLHE40,BNIP3L,CAST,CCL1,CDH6,CNTFR,CRABP1,DDN,DLG3,DMBT1,EGR1,EIF5B,FOS,GHR,GHRH,HSPA5,IL6R,ITGAE,KITLG,LHB,MME,MPZ,NAB2,NSF,NUP54,PIP,PPT2,PRKCD,PRX,RORA,RORC,S100A1,SLC12A2,SMAD1,STAT5A,TBX21,TGFB3,TNFSF10,TP53,VEGFA                                                                                                                                                                                                                                                     |
| LIPE             |        | enzyme                            |           | 0,113  | 0,176  | 0,019  | 2,85E-05 | 5,00E-04 | ABCA1,ADIPOQ,ALDH1A1,ANKRD2,ATF3,CA2,CASP8,CD74,CITED2,COL1A1,COL1A2,EGR1,FOS,G0S2,GRB10,ITGA6,KITLG,MAPT,NET1,NR4A1,PAM,PCK1,PDHA1,PKK4,PER1,PFKFB1,POSTN,PPARG,PVALB,RB1,RXRA,SCARB2,SLC2A4,TKT,TWF2                                                                                                                                                                                                                                                                                     |

|                           |        |                         |           |        |        |        |          |          |                                                                                                                                                                                                                                                                                                                                                                                                                                                                                           |
|---------------------------|--------|-------------------------|-----------|--------|--------|--------|----------|----------|-------------------------------------------------------------------------------------------------------------------------------------------------------------------------------------------------------------------------------------------------------------------------------------------------------------------------------------------------------------------------------------------------------------------------------------------------------------------------------------------|
| ARNT2                     | 0,271  | transcription regulator |           | -2,143 | -1,575 | 0,080  | 2,87E-05 | 5,02E-04 | ABCG1,ABI1,AKR1B1,BST1,CBFB,CDH3,CLCN1,COP22,C RISP2,CYBA,EGF,EGR1,ELL2,FKBP3,FOXH1,GLI1,GLUL,G STA3,HGFAC,HLA- A,IFI16,IGFBP4,IL6R,ITGB3,KCNE5,KLK3,LRRFIP1,LTF,MY CL,NAP1L4,PADI3,PEA15,PFN1,PMFBP1,POSTN,RGS10,S ELENBP1,SLC12A3,SNN,SNX5,SOX10,TACR2,TCF7L1,TH RB,TSC22D3,TSSK2,TYK2,TYROBP,USP2,VEGFA,WNT7B                                                                                                                                                                          |
| ONECUT1                   |        | transcription regulator |           | 0,379  | 0,417  | 0,016  | 2,95E-05 | 5,15E-04 | AASS,ACACB,AFP,AKAP13,ALDH3A1,AMT,APOH,ARHGA P32,ARMC6,ARMT1,BCKDHA,BNIP3L,C1S,C2,CCT8,CFI,C OL5A3,COPB2,DOB2,EED,ELOVL1,F11,FADS3,FAM117A,F AS,G6PC,GLA,GTF2E1,HLA- G,HMGB2,HNF1B,HNF4A,HNRNPR,HSD17B4,ITGAV,ITIH1, KLF3,LPL,LRRRC59,LUC7L3,MFSD1,MGST3,MYOF,NDC1,N FKBI,NR0B2,OAT,PCK1,PFKFB1,PHTF1,PMEL,PPFIBP1, PSMA1,RARG,RORA,RORC,SH3BGR,SNW1,SPAST,TAO K3,TBX2,TNFSF10,USP46,UPT3,VWA5A                                                                                           |
| EIF3A                     | 0,226  | other                   |           | -1,088 | -1,203 | -0,044 | 2,98E-05 | 5,18E-04 | CDKN1B,ISG15,NDRG1,RAD23B,RPA1,RPA2,RPA3                                                                                                                                                                                                                                                                                                                                                                                                                                                  |
| LIF                       | -0,074 | cytokine                |           | 0,915  | 1,051  | 0,021  | 3,01E-05 | 5,22E-04 | A2M,ACACA,AFP,BMP7,CCNA2,CISH,CSSL1,CYFIP1,CYP 11B2,CYP26A1,EGR1,ERAP1,EVX1,FBP1,FGF5,FN1,FOS,F OXF1,FOXP3,GATA6,GHRH,HBEGF,HIF1A,HLA- G,HOXB1,IFI16,IL7,JUNB,LEP,LPL,MMP1,MYOG,NKX2- 5,NMI,NPPA,PECAM1,PIM1,PPARG,PRDM14,PRPH,SERP1 NA3,SNAP23,SOC2,SOD2,SPP1,STAT3,TIMP1,TNC,TNF RSF11B,TP53,TSPAN7,VEGFA,WT1                                                                                                                                                                           |
| Pro-inflammatory Cytokine |        | group                   |           | 0,022  | 0,230  | 0,064  | 3,03E-05 | 5,23E-04 | ADM,AKR1B1,ASS1,CD47,CLU,F3,GLUL,GSTA1,HDAC6,H MOX1,HSPA5,LCN2,LGALS1,NFE2L2,NOS2,NR4A1,S100A 1,SLC6A4,SPINT1,TIMP1,TLR2,UBD,VCAM1                                                                                                                                                                                                                                                                                                                                                        |
| GAPDH                     |        | enzyme                  | Inhibited | -2,580 | -2,706 | -0,033 | 3,16E-05 | 5,44E-04 | C2,CCL20,DUSP1,ENO1,FCER1G,HLA- C,IFIT2,IFITM1,IFITM2,KLK3,OAS1,SPP1,STAT1,UBE2L6,W ARS1                                                                                                                                                                                                                                                                                                                                                                                                  |
| IL10                      |        | cytokine                |           | 0,315  | 0,379  | 0,008  | 3,26E-05 | 5,58E-04 | ABCA1,ADM,ALOX5AP,ARAP2,BAX,CASP3,CASP8,CCL1,C CL16,CCL17,CCL20,CCL22,CCR4,CD163,CD1A,CD44,CD8 3,CDKN1B,CLCA1,COL1A1,CSF3,CTLA4,CTSS,CTS2,CX3 CR1,CXCL6,DUSP1,ELAVL1,F3,FAAH,FAS,FCER1G,FOS,F OXP3,GZMA,HLA- G,HMOX1,HPGD,HTATIP2,IFIT2,IGFBP4,IL10RA,IL13,IL17R B,IL18,IL7,IRAK1,ITGAE,KITLG,LGALS1,LTB,LY75,MMP1,M UC1,MYOG,NOS2,NPHS1,NR4A3,PAM,PDCC1,PSMB9,RA RRES1,RGS16,SLC6A4,SNAP23,STAT1,STAT3,TAP1,TER T,TIMP1,TLR2,TLR3,TNFRSF13B,TNFSF10,TSC22D3,VCAM1,VCAN,VFGFA,VTGN1,ZFP36 |
| GATA1                     | -0,126 | transcription regulator |           | -2,093 | -1,875 | 0,031  | 3,29E-05 | 5,59E-04 | ABCC4,ACTN1,ALOX12,ALOX5,ALOX5AP,BTG2,BZW2,CA 1,CA2,CBX5,CCR4,CDK4,CDKN1B,CPD,CYBB,CYFIP1,DM TN,EGR1,EPB42,EXOC1,FHL1,FOSB,GNAS,GP9,GUCY1B1 ,GYPA,GYPB,HBB,HNRNPAB,IL13,IL6R,INHA,IRF8,ITGA6,I TGB3,JUNB,LEPR,LYZ,MAGED1,MCM3,MCM5,MITF,MSH2, NAB2,NFIL3,NFKB1,NPPA,PCNA,PECAM1,PIM1,PLXNA2,P RG2,PSTPIP2,RFC4,RRM1,SLC4A1,SMARCE1,SPOCK2,S PTB,SSBP3,ST3GAL6,STAT5A,TAC3,TFEB,TRIM29,USP16                                                                                               |
| FN1                       | 0,341  | enzyme                  |           | 0,722  | 1,005  | 0,046  | 3,29E-05 | 5,59E-04 | .VDR ACTR2,AHCY,APP,BNIP3L,CANX,CAPN2,CASP7,CD83,CD K4,CDKN1B,CHRN4,COL1A1,CSNK2A1,CTSD,DHCR24,D PF2,F3,FERMT2,FN1,FOS,GSK3A,HK1,HLA- B,IL7,ITGAE,ITGAV,ITGB3,JUND,KIF21B,LAMP1,MAPK8,M ARCKS,MMP1,NES,NFKBIA,NOS2,PCNA,PPP6R2,RALB,S CRN1,SDCBP,SEC23B,SMAD2,SMARCA4,SNAI1,SNAP23, SPP1,SQSTM1,TLR2,VIM,VPS45                                                                                                                                                                            |
| ZBTB17                    |        | transcription regulator | Inhibited | -2,511 | -2,708 | -0,046 | 3,42E-05 | 5,76E-04 | ATOH1,BHLHE40,CAMK2N1,CCNA2,CCNB1,CCNB2,CDC2 0,CDK1,CDKN1C,CKAP2,DCT,DOB2,DDIT3,ECT2,EGR1,KI F20A,LDLR,NDC80,NOCT,ODC1,OSMR,PBK,PRC1,RHOA, UBE2C,ZFP36                                                                                                                                                                                                                                                                                                                                    |
| JUNB                      | -0,667 | transcription regulator |           | 0,939  | 1,164  | 0,052  | 3,43E-05 | 5,76E-04 | APOC3,APOM,ATF3,C3,CCR4,CDC20,CDKN1B,CGA,CLU, COL1A1,COL1A2,COMT,DARS1,DUSP1,FN1,FOSL1,FOXP 3,HMOX1,HPGD,ITGAV,ITGB3,JUNB,LCN2,MMP1,MYL12A, NCF2,PAK3,PNPLA2,ROCK1,SGK1,SNAI1,SST,SWAP70,TI MP1,VAMP8                                                                                                                                                                                                                                                                                     |
| let-7                     |        | microRNA                | Inhibited | -4,282 | -4,819 | -0,077 | 3,43E-05 | 5,76E-04 | AURKA,BTG2,CASP3,CBFB,CCNA2,CCNB1,CD44,CDC20, CDC23,CDK1,CDK8,COL1A1,COL1A2,COL3A1,E2F4,EIF4G 2,ERF,FARP1,FN1,FOSL1,GPI,GPX7,GT2,IL6R,ITGB3,KR AS,MAD2L1,MCM2,MCM3,MCM5,NFKB1,NRAS,PBX2,PKM, PLAGL2,PPP1R12B,PROM1,RFC2,RFC4,RFC5,RIOX2,RRM 1,RRM2,S100A4,SMAD2,SSR1,STAT3,VIM,YAP1,ZFP36                                                                                                                                                                                                 |

|                     |        |                                 |           |        |        |        |          |          |                                                                                                                                                                                                                                                                                                                                                                                           |
|---------------------|--------|---------------------------------|-----------|--------|--------|--------|----------|----------|-------------------------------------------------------------------------------------------------------------------------------------------------------------------------------------------------------------------------------------------------------------------------------------------------------------------------------------------------------------------------------------------|
| ATF3                | -1,334 | transcription regulator         |           | 1,709  | 1,629  | -0,017 | 3,44E-05 | 5,76E-04 | ADIPOQ,ADIPOR1,ASNS,ATF3,AURKA,BHLHE41,CD83,CDK1,CDK4,CGA,CHAC1,DDIT3,FBP1,G6PC,GBP2,HSPA5,KLK3,LDLR,MMP1,MSH2,NOS2,PCK1,PPP1R15A,SRI,STAT3,TLR2,TP53,TP53I3,TP73                                                                                                                                                                                                                         |
| Ca2+                |        | chemical - endogenous mammalian | Inhibited | -3,773 | -3,460 | 0,043  | 3,53E-05 | 5,88E-04 | AHR,ANKH,APP,AQP5,ARC,ATF3,CD83,CDK4,CDKN1B,CGA,COL1A1,CUL9,CYP27B1,DDIT3,DUSP1,EGR1,ELK1,FAH,FN1,FOS,FOSL1,GAST,GUCY1A2,HBEGF,HSPA5,IL6R,ITGA6,IVL,JUNB,JUND,KLK5,KLK7,KRT10,LHB,MCAM,NDRG1,NFKBIA,NOS1,NOX5,NPPA,NR4A1,NR4A3,ODC1,PADI3,PER1,PER2,PLS3,PPARA,PPARG,PRL,PTTG1,PYY,SGK1,SLC12A3,SPP1,SST,SSTR2,TGM1,UGCG,VCAM1,VDR,VEGFA                                                  |
| TGFB3               | -0,172 | growth factor                   |           | 0,329  | 0,630  | 0,057  | 3,91E-05 | 6,49E-04 | BHLHE40,CCN2,CD59,CDH6,CDKN1B,CLDN11,COL1A1,COL1A2,COL3A1,ELN,F2RL1,FN1,FOS,FOSB,HTRA1,ITGAV,ITGB3,JUND,LTBP2,MMP1,PLOD2,PTEN,SERPINE2,SMAD2,SNAI1,TGFB3,TNC,TNFRSF11B,TNS1,TPM1,TSPAN13,VEGFA                                                                                                                                                                                            |
| JAK1                | 0,545  | kinase                          |           | 1,201  | 1,518  | 0,070  | 3,95E-05 | 6,50E-04 | BID,CAPN1,CDKN1B,CHI3L1,CSF3,FOS,HIF1A,HLA-A,HLA-C,HLA-F,IFIT2,IRF7,IRF9,JUNB,MX1,MYOD1,OSMR,PSMB9,SNAI1,STAT1,STAT3,TAP1,TNS4                                                                                                                                                                                                                                                            |
| mir-133             |        | microRNA                        |           | -1,677 | -1,988 | -0,066 | 3,95E-05 | 6,50E-04 | ARFIP2,CCN2,CCNB1,CMTM6,CORO1C,CTBP2,DNMT1,ELAVL1,FN1,GSTP1,HLA-G,KLF15,LASP1,LPGAT1,MET,MSN,PITX3,PPARG,RHOA,SLC2A4,TNFSF10,TNNT2,VCAN                                                                                                                                                                                                                                                   |
| 5-hydroxytryptamine |        | chemical - endogenous mammalian |           | -1,164 | -0,881 | 0,057  | 4,01E-05 | 6,59E-04 | AP2S1,ARC,ARHGEF1,ASIC2,ASIC3,CCN2,CYBB,EGR1,F3,FADD,FOS,GAD1,HBEGF,HIF1A,LIPC,MAPK13,MYL6,NCF2,NR4A1,NUCB2,PFN1,PLCB2,PLIN3,PPP1CA,PRL,RAB8A,SLC10A2,SLC6A4,STX4,TRPV1,TUBB,UCP2,VCAM1                                                                                                                                                                                                   |
| PRDM1               | -0,108 | transcription regulator         |           | -0,754 | -0,880 | -0,018 | 4,05E-05 | 6,64E-04 | ACOX2,ADGRG1,AFP,ALPL,APOM,ATP9A,BMP5,CA9,CCL20,CD44,CD53,CD74,CHI3L1,CLDN1,CSF3,CXCL6,ERAP1,ESR1,FOS,FOSL1,GAD1,GALNT2,GPX5,HLA-DRA,IRF8,KHDRBS3,KRT81,LGALS1,LHX3,LIPF,ME1,MMP25,MS4A4A,MYO1A,NOS2,PDCD1,PLAAT4,PSMB10,PSMB8,REG1A,SERPINA3,SLC16A5,SLC2A5,SMPDL3B,SNAI1,ST14,SWAP70,TAPBP,TBX21,TNFRSF10D,TNFRSF13B,TNFSF10,TREH,TRIM38,XRCC5                                          |
| corticosterone      |        | chemical - endogenous mammalian |           | 0,422  | 0,433  | 0,002  | 4,08E-05 | 6,66E-04 | ACACA,ANXA1,APOB,APP,ARC,AVP,CCN2,CDK4,CDKN1B,CGA,CSHL1,CYBA,DDIT3,FOS,GCK,GLUL,HSPA5,KLF9,LEP,LHB,MAPK8,NOS1,NOS2,NPPA,PDK4,PNPLA2,PRL,SGK1,SLC12A3,SLC1A2,TLR2,UCP2,WNT10B,WNT7B                                                                                                                                                                                                        |
| hydrocortisone      |        | chemical - endogenous mammalian |           | -1,864 | -1,789 | 0,013  | 4,11E-05 | 6,70E-04 | ACO1,ADM,ALDH18A1,ALDH1L1,APP,BCLAF1,CCL17,CCN2,CD163,CDK1,CFD,CSHL1,CYP3A4,FAS,FN1,GADD45B,GBP1,GLUL,GNAS,GPR153,IGFBP4,INS,IVL,KLK3,LPL,LY75,NFKBIA,NOTCH4,PLG,PPARG,PRL,STAT5A,STC2,TLR2,TNFRSF11B,TP53,TUBB,VAMP2                                                                                                                                                                     |
| Tgf beta            |        | group                           |           | -0,134 | 0,128  | 0,036  | 4,17E-05 | 6,79E-04 | ABCA1,ACKR2,ANKH,AXIN1,BECN1,BHLHE40,CASP1,CASP8,CCL1,CCN2,CDKN1B,CLU,COL1A1,COL1A2,COL4A1,COL4A2,CSF3,CTF1,CTLA4,CX3CR1,FN1,FOS,FOXP3,FSTL1,FURIN,GADD45B,HMOX1,HNRNPAB,HTATIP2,IGFBP4,IL13,IL32,ITGA6,ITGAV,ITGB3,JAK1,JUNB,MET,MMP1,MMP7,MUC1,NCR3,NOS2,PDCD1,POSTN,PROM1,PTEN,RHOB,RNF111,RORA,RORC,SGK1,SMAD2,SNAI1,SPP1,SSBP3,TBX21,TERT,TGFB1,TIMP1,TLR2,TNFRSF11B,VCAM1,VEGFA,VIM |
| ZBTB20              | 0,088  | transcription regulator         |           | 0,320  | 0,333  | 0,003  | 4,37E-05 | 7,08E-04 | AFP,CISH,CYP2B6,CYP2C8,CYP3A5,G6PC,GAS6,GCGR,GCK,GHR,GPC3,GSTM5,IGFALS,LEP,LEPR,NFKBIA,PCK1,PDK4,SOCS2                                                                                                                                                                                                                                                                                    |
| GPBR1               | -0,229 | G-protein coupled receptor      | Inhibited | -4,022 | -3,720 | 0,073  | 4,37E-05 | 7,08E-04 | ATF3,BAX,BHLHE40,CCN2,DDIT3,DUSP1,EGR1,ESR1,ESRRA,FOS,FOSB,HSPA5,IER2,LTF,MTX1,NFKBIA,PPP1R15A,RGS16,ZFP36                                                                                                                                                                                                                                                                                |
| PARP9               |        | enzyme                          | Activated | 2,916  | 3,138  | 0,071  | 4,38E-05 | 7,08E-04 | CD74,HLA-DQB1,HLA-E,IFI44,IFIT2,IFIT3,IRF7,ISG15,SP110,STAT1                                                                                                                                                                                                                                                                                                                              |
| L-glutamic acid     |        | chemical - endogenous mammalian |           | 0,129  | 0,372  | 0,045  | 4,62E-05 | 7,40E-04 | APP,B2M,BAX,CASP3,CDS1,CFD,CIDEA,CYP2B6,CYP3A4,EGR1,FOS,FOSB,GADD45B,HEXA,HIF1A,IL18,JUNB,LEP,MLL,NFIL3,NOS1,NOS2,PCNA,PER1,RHOA,ROCK1,SLC1A2,TAP1,TIMP1,TOR3A,TP53                                                                                                                                                                                                                       |
| AVP                 | -0,233 | other                           | Inhibited | -2,402 | -2,204 | 0,051  | 4,63E-05 | 7,40E-04 | ADM,ATF3,AVP,COL3A1,EGR1,FOS,HSPA5,MYOG,NGF,NOS1,NOS2,NPPA,PRKCA,RRM1,RRM2,S100A6,SCNN1B,ST                                                                                                                                                                                                                                                                                               |
| ERBB3               | -0,009 | kinase                          |           | -0,356 | -0,403 | -0,009 | 4,68E-05 | 7,47E-04 | ADAM9,BAX,CD47,CDKN1B,CLU,COL1A1,DUSP1,EGR1,F3,FBN1,FN1,GHR,HBEGF,HIF1A,HMOX1,IER2,MX1,PRL,PTEN,RRAS,SERPINA3,SLPI,SNAI1,SPINK4,TNC,USP14,VEGFA                                                                                                                                                                                                                                           |
| ITGAV               | 0,474  | transmembrane receptor          |           | 1,309  | 1,471  | 0,046  | 4,72E-05 | 7,51E-04 | BAX,BIRC2,CDK1,CDKN1B,COL1A1,COL1A2,FN1,FOS,ITGAV,ITGB3,LDLR,MMP1,PCNA,TIMP1,TP53                                                                                                                                                                                                                                                                                                         |



|                                             |       |                                   |           |        |        |        |          |          |                                                                                                                                                                                                                                                                                                                                                                                                                                                                                                                                                      |
|---------------------------------------------|-------|-----------------------------------|-----------|--------|--------|--------|----------|----------|------------------------------------------------------------------------------------------------------------------------------------------------------------------------------------------------------------------------------------------------------------------------------------------------------------------------------------------------------------------------------------------------------------------------------------------------------------------------------------------------------------------------------------------------------|
| NCOA1                                       |       | transcription regulator           |           | -0,830 | -0,950 | -0,022 | 4,79E-05 | 7,60E-04 | ABCA1,ADIPQ,AGRN,AHR,ALDOA,BTG2,C3,CASP7,CASP8,CD24,CSHL1,CYP2B6,DIO1,EGR1,ELK1,FOS,FRAT2,HIF1A,HNF1A,HSD3B2,JUNB,CLK3,LEP,LHB,LYZ,MAPK8IP2,NFKBIA,NOCT,NR0B2,PCK1,PDCC2,PKLR,PMM2,PPARG,PRL,PSMG2,PTGES2,RB1,TFE1                                                                                                                                                                                                                                                                                                                                   |
| TGM2                                        | 0,238 | enzyme                            | Activated | 2,273  | 2,518  | 0,034  | 4,85E-05 | 7,67E-04 | ALPL,BTG2,C3,CA2,CCL22,CD74,CSF3,CX3CR1,DAAM2,DAPK2,DCSTAMP,DDX60,DLEU1,FCER1G,FN1,GCA,GIMAP6,GM2A,HIF1A,HLA-B,IFI35,IFIT2,IFIT3,IFIT5,IL10RA,IRF9,ITGA6,ITGB3,NCF2,OLFM4,PIM1,PLAAT4,PLSCR1,PPP1R16B,SACS,SDCBP,SEMA6B,SEMA7A,SLPI,SP110,SPP1,STAT1,TAP1,TNFRSF11B,TOR1B,TP53,TPCN1,TRIM22,TYROBP,UBXN8,VSIG4,WDR3,ZNF146                                                                                                                                                                                                                           |
| CNR1                                        |       | G-protein coupled receptor        |           | 0,500  | 0,715  | 0,036  | 4,86E-05 | 7,67E-04 | ACACA,ADIPQ,ALPL,APBB1,BMP7,CA9,CCNB2,CDK1,DDX25,DRD2,DRD5,DYRK2,EAF2,EGF,FOS,GAD1,HAGH,HEYL,HPRT1,HSPA4,CLK7,LEP,LIPC,MDK,NPHS1,NPHS2,PCNA,PDYN,PECAM1,PLSCR1,RAC1,S100A6,SLC2A4,SLIT2,STAT3,TIMP1,UPK2,WNT6                                                                                                                                                                                                                                                                                                                                        |
| MAP3K7                                      |       | kinase                            |           | 0,216  | 0,384  | 0,035  | 4,99E-05 | 7,83E-04 | CCL20,CFB,CXCL6,DDX58,GBP1,GBP2,GCH1,HMOX1,IFI44,IFIH1,IFIT2,IFIT3,IFITM1,IRF7,MAP2K3,MMP1,MYOD1,MYOG,NFKB1,NKX2-5,NPPA,RGS2,SLPI,TERT,TNFSF10                                                                                                                                                                                                                                                                                                                                                                                                       |
| TLR3                                        | 0,546 | transmembrane receptor            | Activated | 1,664  | 2,155  | 0,072  | 5,02E-05 | 7,87E-04 | ABCA1,ATF3,C3,CAST,CCL1,CCL17,CCL20,CD70,CFB,CLCA1,CLU,CSF3,CTH,DDX58,DEFB1,DNMT1,DUSP1,FAS,FOS,FURIN,GADD45B,GBP2,GCH1,HMOX1,IFI16,IFI44,IFIH1,IFIT2,IFIT3,IL13,IL15,IL36A,IRF7,ISG15,JUNB,LCN2,LIPA,MP1,MX1,NFKB1,NMI,NOS2,NR4A1,OAS1,PECAM1,PIK3R3,PLK2,PPP1CA,RHOB,SLPI,SPRY1,STAT1,TIMP1,TLR3,TNFC,TNFSF10,TREML2,TRIM38,ZBTB32,ZC3HAV1                                                                                                                                                                                                         |
| PPARD                                       |       | ligand-dependent nuclear receptor |           | -0,617 | -0,384 | 0,033  | 5,11E-05 | 7,98E-04 | ACAA1,ACACA,ACACB,ALDH2,ALDH3A2,APOA1,APOB,C1QA,C1QB,CDK1,CDK4,CDKN1B,CSAD,CYP2B6,ECI2,FABP1,FBP1,FN1,GAS6,GCK,GPD1,HSD11B2,KYAT1,LPCAT3,PLMAPK1,MYCL,MYOM2,NOS2,NPC1L1,NPPA,OCEL1,PCNA,PDE4C,PDK4,PKLR,PNPLA2,PPARG,PTEN,RBP1,S100A6,SCARB2,SLC10A2,SLC2A4,STAT1,TBX21,TNFRSF11B,TP53,UCP2,VEGFA,VLDR,YWHA,ZBED5                                                                                                                                                                                                                                    |
| miR-16-5p (and other miRNAs w/seed AGCAGCA) |       | mature microRNA                   | Inhibited | -2,774 | -3,328 | -0,080 | 5,18E-05 | 8,08E-04 | ACTR1A,ARL2,CAPRIN1,CDK7,CSHL1,EIF4G2,FNDC3B,GALNT7,GFPT1,GOLPH3L,GRB10,GRN,GTFF2H1,HARS1,HERC6,HMOX1,HPF1,HSP90B1,IFRD1,IPO4,KCNN4,KITLG,LAMC1,LAMTOR3,MLLT11,MSH2,NAA15,NOTCH2,PANX1,PCD4,PHKB,PMS1,PNP,PPIF,RARS1,RIDA,SERPINE2,SKAP2,SLC12A2,SPTLC1,SQSTM1,TIA1,TMEM251,TMEM43,TPP3,UCP2,VEGFA,VPS45,WEE1,WT1                                                                                                                                                                                                                                    |
| Histone h3                                  |       | group                             | Inhibited | -2,795 | -2,621 | 0,066  | 5,38E-05 | 8,38E-04 | ACKR3,ADAM10,ADD2,ADGRB1,ADIPQ,AFP,AKAP12,AQP5,ARHGEF17,ARR3,ATF7IP,ATOH1,B2M,BAHCC1,CA9,CNA2,CCNB1,CDK14,CDK4,CDKN1B,CDX2,CGA,CKAP4,CLPS,COL1A2,CRIP2,CSHL1,CTNNA1,CYP3A5,DIO1,DUSP2,EGR1,ENO3,EPHB3,ESR1,EVX1,FGF5,FOS,GAD1,GATA6,GHR,GLI1,HAND1,HNF4A,HOXA10,HOXB1,HOXB6,IGFBP4,IL13,IL6R,INHA,INS,IRF7,CLK3,MAD2L1,MCM2,MCM3,MCM5,MET,MGLL,MPZ,MX1,MYBL2,NFKBIA,NOS2,PADI3,PCNA,PKLR,PPARG,PROS1,PTEN,RAB38,RB1,RGS10,SATB2,SGK1,SNAI1,SOD2,SPINK4,SPP1,SYNE2,TBX2,TBX21,TBX6,TERT,TLR2,TMPRSS2,TNFSF10,TYRO3,USP3,VAMP8,VEGFA,WDR1,WNT8R,ZNF71P |
| CFTR                                        | 0,009 | ion channel                       |           | -1,808 | -1,838 | -0,006 | 5,43E-05 | 8,40E-04 | ABCA1,ACAA1,ASNS,BLNK,CAPG,CFI,CUBN,CYP2B6,CYP3A5,CYP4A11,DMBT1,FAAH,FABP2,FAS,GML,HADH,HPGD,HSD17B4,IDI1,MYL7,NFKB1,NFKBIA,NOS2,SLC37A4,SPINK4,STAT1                                                                                                                                                                                                                                                                                                                                                                                                |
| PTK2                                        | 0,165 | kinase                            |           | 0,505  | 0,635  | 0,033  | 5,43E-05 | 8,40E-04 | BIRC2,CDKN1B,COL1A1,COL1A2,FN1,FOS,LDLR,LPP,MMMP7,NPPA,P4HA1,PCOLCE2,PTK2,SERPINB1,SNAI1,SPP1,TIMP1,TNC,TP53,VCAM1                                                                                                                                                                                                                                                                                                                                                                                                                                   |
| SERPINF1                                    | 0,589 | other                             |           | -1,065 | -1,084 | -0,005 | 5,43E-05 | 8,40E-04 | ADIPQ,BAX,BID,CCN2,CRYAB,CYBA,CYBB,G0S2,LOXL1,NFKB1,NFKBIA,NGF,NOS2,PPARG,RLBP1,SOD2,SOX10,TNFRSF11B,TNFSF10,VIM                                                                                                                                                                                                                                                                                                                                                                                                                                     |
| Atg5                                        |       | other                             |           | 0,483  | 0,447  | -0,016 | 5,46E-05 | 8,41E-04 | BAX,BID,CASP3,NOS2,SQSTM1                                                                                                                                                                                                                                                                                                                                                                                                                                                                                                                            |
| RCHY1                                       |       | enzyme                            |           | -0,495 | -0,651 | -0,080 | 5,46E-05 | 8,41E-04 | CDKN1B,HDAC1,CLK3,TP53,TP73                                                                                                                                                                                                                                                                                                                                                                                                                                                                                                                          |

|                 |        |                                   |           |        |        |          |          |                                                                                                                                                                                                                                                                                                                                                                                                                                                                                                                                                                                                     |                                                                                                                                                                                                                                                                                                                                                                                           |
|-----------------|--------|-----------------------------------|-----------|--------|--------|----------|----------|-----------------------------------------------------------------------------------------------------------------------------------------------------------------------------------------------------------------------------------------------------------------------------------------------------------------------------------------------------------------------------------------------------------------------------------------------------------------------------------------------------------------------------------------------------------------------------------------------------|-------------------------------------------------------------------------------------------------------------------------------------------------------------------------------------------------------------------------------------------------------------------------------------------------------------------------------------------------------------------------------------------|
| SOX2            |        | transcription regulator           | 1,333     | 1,227  | -0,011 | 5,51E-05 | 8,47E-04 | ABCC3,ABCC6,ABCG2,ABTB2,ADRA2B,AHR,ALB,ALDH1A1,ALOX5,ANKRD17,ARPC1B,ATF3,AXIN1,BHLHE40,C1QL1,CCN2,CCN5,CD44,CDKN1B,CDX2,CER1,CITED2,CLDN11,COL11A2,COL1A1,CRABP2,CST6,CYP26A1,DLX5,DNMT1,DUSP1,ELOVL1,EPB41L2,EPCAM,EVX1,EXT2,FABP1,FABP2,FARP1,FGF5,FOS,FOXF1,FOXH1,FOXO4,FUT4,GADD45B,GATA6,GCK,GJC2,GLI3,HAND1,HHAT,HOPX,HOXB1,KITLG,KLK14,KRT19,LIMS2,MPZL1,NEUROG1,NFASC,NOTCH4,NRP1,OVOL1,PECAM1,PIK3R3,PLXNB3,PPARA,PPARG,PPL,PRDM14,PRKCD,PROM1,S100A1,S100A13,SIRT2,SLC12A2,SMAD1,SNAI1,SOX10,SOX13,SOX21,SPRR3,SPRY4,STRA6,TBX6,TGM1,TIA1,TNNI1,TNR,TXNRD1,UGT8,VCAN,VFGFA,VIM,WNT8R,YAP1 |                                                                                                                                                                                                                                                                                                                                                                                           |
| IFN Beta        |        | group                             | Activated | 3,045  | 3,375  | 0,059    | 5,73E-05 | 8,78E-04                                                                                                                                                                                                                                                                                                                                                                                                                                                                                                                                                                                            | ATF3,CASP4,CD74,CD83,CYP3A4,DDX58,DPP4,DUSP1,FN1,HLA-A,HLA-B,HLA-G,IFI16,IFI35,IFI44,IFIH1,IFIT2,IFIT3,IFITM1,IFNAR2,IL15,IRF7,IRF9,ISG15,MX1,NOS2,OAS1,PRKCA,SPRY1,SPRY2,SPRY4,STAT1,TAPBP,TLR3, TNFSF10,TP53,TXNRD1,ZBP1                                                                                                                                                                |
| cholecalciferol |        | chemical - endogenous mammalian   | Activated | 2,102  | 2,348  | 0,044    | 5,82E-05 | 8,88E-04                                                                                                                                                                                                                                                                                                                                                                                                                                                                                                                                                                                            | ADGRG1,ALOX5,ANXA2,BECN1,CD83,CDA,CDKN1B,COL1A1,CSTF2T,CYP24A1,FABP6,FOS,FOXP3,ITGB2,LY75,ME1,MS4A6A,MYO6,NROB2,PIP5K1B,PPARG,PRKX,PTPRB,PVALB,RB1,RORC,SPP1,TNFRSF11B,TNFSF10,TREML2,UBE2E1,VDR,WT1                                                                                                                                                                                      |
| THRA            |        | ligand-dependent nuclear receptor |           | -0,962 | -0,949 | 0,003    | 5,85E-05 | 8,91E-04                                                                                                                                                                                                                                                                                                                                                                                                                                                                                                                                                                                            | ACACA,APOA1,APP,CCL17,CD44,CDKN1B,CDX1,CDX2,CGA,CSHL1,CSNK1A1,CYP27B1,DIO1,DIO3,DR1,FOS,FURN,HMOX1,IL7,KLF9,LDLR,LPL,MC4R,MMP7,NME1,NPPA,NRGN,PCK1,PPARG,PRL,PROM1,PTTG1,RB1,SLC2A4,THRB,TP53                                                                                                                                                                                             |
| DCN             | -0,085 | other                             |           | -0,425 | -0,459 | -0,008   | 5,92E-05 | 9,00E-04                                                                                                                                                                                                                                                                                                                                                                                                                                                                                                                                                                                            | BAX,CASP3,CASP8,CCN2,CDKN1B,CDKN1C,COL1A2,DUSP1,FBN1,HIF1A,HLA-DQB1,ITGAV,MET,MMP1,MYOG,NOS2,TP53,VCAM1,VEGFA                                                                                                                                                                                                                                                                             |
| LDLR            | -0,509 | transporter                       |           | 0,955  | 0,892  | -0,020   | 6,11E-05 | 9,22E-04                                                                                                                                                                                                                                                                                                                                                                                                                                                                                                                                                                                            | ABCA1,ABCG1,ACACA,APOB,AURKA,C1QA,CCNA2,CCNB1,CCNB2,CD47,CDC25B,CDK1,CFB,CX3CR1,CYP7B1,DDIT3,DUSP1,EGR1,ELOVL6,F3,FGL2,FOXP3,G6PC,GADD45G,GAS6,GATM,GRAP2,HSPA5,IRF7,ITGB3,KIF20A,LCN2,LDLR,LPL,LYZ,NOD1,PLTP,PPARA,PPARG,PPP1R15A,PRC1,PSMB9,SIGLEC9,SPP1,SYN1,TAP1,TLR1,UBE2C,VCAM1,VCAN,VLDLR,ZBP1                                                                                     |
| FOXO4           | -0,303 | transcription regulator           |           | -1,691 | -1,753 | -0,012   | 6,15E-05 | 9,27E-04                                                                                                                                                                                                                                                                                                                                                                                                                                                                                                                                                                                            | ACACA,ANXA3,C1QA,CASP8,CCN2,CDKN1B,COL4A1,COL4A2,DHCR24,ELOVL6,GADD45A,GADD45B,HIF1A,IDI1,IL10RB,ITGB2,NAMPT,OVOL1,PLA2G2D,PRKCD,PTPRB,PTPRC,SGK1,SOD2,SPTLC2,VCAM1,VEGFA,ZFAND5                                                                                                                                                                                                          |
| MYCN            |        | transcription regulator           |           | -0,864 | -0,738 | 0,017    | 6,21E-05 | 9,34E-04                                                                                                                                                                                                                                                                                                                                                                                                                                                                                                                                                                                            | ABCA1,ABCC1,ABCC3,ABCC4,ABCE1,ABCG2,ABCG4,ACTG1,ALDH1A1,ALDOA,ARPC1B,B2M,BAX,BID,CCN2,CDK7,CDKN1B,CITED2,CKAP4,CLU,COL18A1,COL1A1,COL4A1,COL5A2,DUSP2,EED,EIF4G2,FBN1,FGF5,FN1,GATA6,HLA-A,KDM5B,KLK3,LGALS1,MX1,MYL12A,NBN,NDRG1,NME1,ODC1,P3H1,PDIA4,POLR2L,PTK2,RBBP7,RPL13A,RPLP2,RPS19,RUSC2,S100A10,SLC16A7,SLC1A2,TERT,TMED9,TMPRSS2,TP53,TPM1,TUBA1B,TUBB,UBE2V2,UCHL1,VIM,ZFAND5 |
| ATM             |        | kinase                            |           | 0,717  | 0,916  | 0,054    | 6,55E-05 | 9,80E-04                                                                                                                                                                                                                                                                                                                                                                                                                                                                                                                                                                                            | ADIPOQ,BAX,BIRC2,CCN2,CD70,CDK4,CDKN1B,CLU,DUSP1,FAS,FDXR,FN1,GADD45A,GADD45B,GADD45G,HMOX1,LEP,PCNA,PSMC4,RRM1,RRM2,TP53,XRCC5                                                                                                                                                                                                                                                           |
| MAP2K3          | -0,241 | kinase                            |           | -1,122 | -0,838 | 0,070    | 6,55E-05 | 9,80E-04                                                                                                                                                                                                                                                                                                                                                                                                                                                                                                                                                                                            | BAX,CDKN1B,COL1A1,COL1A2,COL3A1,DDIT3,GP9,GSTP1,IRF9,ISG15,IVL,MMP1,MUC5B,NOS2,NPPA,PPA1,RGS7,SGK1,SLC2A4,SLC5A5,STAT1,TNFSF10,VEGFA                                                                                                                                                                                                                                                      |
| SPI1            |        | transcription regulator           |           | 0,782  | 0,989  | 0,031    | 6,70E-05 | 9,98E-04                                                                                                                                                                                                                                                                                                                                                                                                                                                                                                                                                                                            | BAX,BCL7A,BLNK,CCL17,CCL22,CCNA2,CCNB1,CCNB2,CDK1,CDK4,CEBPE,CHI3L1,CTSS,CYBB,DCSTAMP,EPB41L2,EPX,FCER1G,FCGRT,FOS,FOXO1,FUT7,IFI44,IFIT2,IFIT3,IFITM1,IL13,IL18,IRF7,IRF9,ISG15,ITGB2,KLK1,KLK3,LBR,ILIRB3,LTF,LYZ,MME,MMP1,MT1X,MX1,NCF2,NKX2-5,NOS2,PARP12,PCNA,PRG2,PSMB10,PSMB8,PSMB9,PTCRA,PTEN,PTPRC,RACK1,SP110,SPP1,TLR2,TNFSF10,TIRM2,VIM                                       |
